1 **Rules for hardening influenza A virus liquid condensates**

2 Temitope Akhigbe Etibor<sup>1</sup>, Sílvia Vale-Costa<sup>1</sup>, Sindhuja Sridharan<sup>2</sup>, Daniela Brás<sup>1</sup>, Isabelle  
3 Becher<sup>2</sup>, Victor Hugo Mello<sup>1</sup>, Filipe Ferreira<sup>1</sup>, Marta Alenquer<sup>1,3</sup>, Mikhail M Savitski<sup>2</sup> and Maria  
4 João Amorim<sup>1,3\*</sup>

5

6 <sup>1</sup> Cell Biology of Viral Infection Lab, Instituto Gulbenkian de Ciência, Oeiras, Portugal.

7 <sup>2</sup> EMBL, Heidelberg, Germany

8 <sup>3</sup> Cell Biology of Viral Infection Lab, Universidade Católica Portuguesa, Católica Medical School,  
9 Católica Biomedical Research Centre, Portugal.

10

11 **\* Correspondence**

12 [mjamorim@igc.gulbenkian.pt](mailto:mjamorim@igc.gulbenkian.pt) (M.J.A.)

13

14

## 15 **Summary**

16 Multiple viral infections form biomolecular condensates in the host cell to compartmentalize viral  
17 reactions. Accumulating evidence indicates that these viral condensates may be hardened, a  
18 strategy with potential for exploitation as novel antiviral therapy, given that viral reactions rely on  
19 specific material properties for function. However, there is no molecular understanding on how to  
20 specifically and efficiently modify the material properties of viral condensates, a pre-requisite for  
21 overcoming off-target effects by rational drug design. *In vitro*, the material properties of biological  
22 condensates are modified by different thermodynamic parameters, including free energy,  
23 concentration, and type/strength of interactions. Here, we used influenza A virus liquid cytosolic  
24 condensates, A.K.A viral inclusions, to provide a proof of concept that modulating the  
25 type/strength of transient interactions among the interactome in IAV inclusions is more efficient at  
26 hardening these structures than varying the temperature or concentration, both in *in vitro* and in  
27 *in vivo* models. This stabilization can be achieved by a known pharmacological sticker that can  
28 specifically change the material properties of viral inclusions without affecting host proteome  
29 abundance nor solubility. Our work supports the development of antivirals targeting the material  
30 properties of biomolecular condensates in viral infections. It also provides a framework for the  
31 selection of compounds with this activity for general application and thus provides an advance in  
32 disease therapy.

33

34

## 35 INTRODUCTION

36 Central to the spatiotemporal control of reactions in many viral infections is the formation of  
37 biomolecular condensates that facilitate key steps of viral lifecycles (Etibor et al., 2021). In  
38 influenza A virus (IAV) infection, this is key for assembling its segmented genome, a complex  
39 composed of 8 different viral RNA segments (vRNA) (Pons, 1976). Each vRNA is encapsidated  
40 by molecules of nucleoprotein (NP) along its length, with one unit of the RNA dependent RNA  
41 polymerase (RdRp, consisting of PB2, PB1 and PA) bound to the base-paired RNA termini,  
42 forming viral ribonucleoproteins (vRNPs) (Amorim, 2019). How the 8 vRNP complex self-  
43 assembles is unknown, although it is known that it relies on RNA-RNA interactions amid vRNPs  
44 and is a selective process because most virions contain exactly 8-different segments (Hutchinson  
45 et al., 2010). After export from the nucleus where vRNPs are synthesized, vRNPs reach the  
46 cytosol and induce the formation of cytosolic condensates, known as viral inclusions (Amorim et  
47 al., 2011; Avilov et al., 2012; Chou et al., 2013; Einfeld et al., 2011; Lakdawala et al., 2014;  
48 Momose et al., 2011), which we postulated to be sites dedicated to IAV genome assembly  
49 (Alenquer et al., 2019). Interestingly, IAV cytosolic inclusions exhibit liquid properties (fuse and  
50 divide, dissolve upon shock and are dynamic) (Alenquer et al., 2019), providing the first indication  
51 that defined material properties are critical for the formation of influenza epidemic and pandemic  
52 genomes.

53 As the list of viruses utilizing liquid biomolecular condensates is increasing fast, including  
54 reoviruses, human cytomegalovirus, HIV, rabies, measles, SARS-CoV-2 (reviewed in (Etibor et  
55 al., 2021; Lopez et al., 2021)), it becomes pertinent to ask whether targeting the material  
56 properties could constitute a novel antiviral approach. Recently, the Sonic hedgehog pathway  
57 antagonist cyclopamine and its analogue A3E were demonstrated to inhibit human respiratory  
58 syncytial virus (hRSV) replication by altering the material properties of viral condensates (Risso-  
59 Ballester et al., 2021). However, compounds targeting hRSV-related (Risso-Ballester et al., 2021)  
60 and cancer-associated (Klein et al., 2020) condensates exhibited off-target effects. Therefore, a  
61 critical advance in condensate disease therapy, including in viral infections, requires the defining  
62 of the yet unknown rules for efficiently and specifically targeting selected biological condensates.  
63 Such knowledge would create opportunities towards rational design of molecules targeting these  
64 structures and hence reduce off target effects. In several studies, it was demonstrated that the  
65 properties of biological condensates respond to many factors in a system-dependent manner  
66 (Alberti et al., 2019; Falahati and Haji-Akbari, 2019; Hyman et al., 2014; Milovanovic and De  
67 Camilli, 2017; Mittag and Parker, 2018; Perdikari et al., 2020; Riback and Brangwynne, 2020;  
68 Snead and Gladfelter, 2019). Entropic free energy (Quiroz and Chilkoti, 2015), concentration

69 (Riback et al., 2020), type, number and strength of interactions (Sanders et al., 2020), have been  
70 demonstrated to affect the formation and properties of biomolecular condensate. This suggests  
71 that *in vivo* strategies able to modify these parameters could offer solutions for drug development.  
72 For example, pathways affecting local energy production, consumption or metabolism will alter  
73 the free energy landscape of biomolecular condensates (Patel et al., 2017). Similarly, pathways  
74 that regulate the local density of condensate drivers could affect concentration (Banani et al.,  
75 2016; Riback et al., 2020). Finally, pathways involved in post-translational modifications (Rai et  
76 al., 2018), pH (Kroschwald et al., 2018; Munder et al., 2016) or ionic strength (Yang et al., 2020),  
77 as well as strategies promoting aggregation or dissolution of condensate interactomes could  
78 affect the type, number and strength of interactions (Bracha et al., 2019a; Bracha et al., 2019b;  
79 Zhu et al., 2019). However, *in vivo*, it is unknown if changes in free energy, concentration or  
80 strength/type of interactions affect equally the material properties and function of biomolecular  
81 condensates.

82 In this work, we meet the critical need to identify the most efficient and specific strategies to  
83 harden IAV liquid inclusions. We found that the stabilization of intersegment interactions is more  
84 efficient at hardening IAV inclusions than varying the temperature or the concentration of the  
85 drivers of IAV inclusions. Importantly, we show that the hardening topological phenotype is  
86 observed in the lungs of infected mice. We also report that it is possible to affect viral inclusions  
87 without imposing additional changes in host protein abundance and solubility using solubility  
88 proteome profiling of infected cells (Sridharan et al., 2022). In sum, our data support the  
89 development of strategies targeting the material properties of cellular condensates in viral  
90 infections and provides a critical advance in disease therapy.

## 91 **Keywords**

92 Phase transition, Biomolecular condensates, Viral inclusions, Influenza A virus,  
93 Thermodynamics, Pharmacological hardening, Temperature, Concentration, Molecular  
94 interaction, Proteome-wide solubility, Thermal stability.

95

96

97

## 98 RESULTS

99

### 100 Framework to identify perturbations that harden IAV liquid inclusions

101 We previously demonstrated that viral inclusions formed by IAV infection display a liquid profile in  
102 the sense that they drip, acquire a spherical shape upon fusion and dissolve in response to  
103 hypotonic shock or brefeldin A treatment (Alenquer et al., 2019). Here, we identify the best  
104 strategies to harden viral inclusions to investigate if altering their material properties may be a  
105 novel antiviral therapy. For this, we systematically probed and compared the impact of  
106 temperature, concentration, and number/strength of ligations on the material properties of liquid  
107 viral inclusions, as a proxy of entropic, molecular and valency contributions, respectively. We  
108 selected these parameters as they are well understood to regulate the interactions amongst  
109 components and the material properties of condensates (Quiroz and Chilkoti, 2015; Riback et al.,  
110 2020; Sanders et al., 2020) (**Figure 1A**). Methodologically, we employed established protocols  
111 for the thermodynamic perturbations to directly compare the effect of several parameters in one  
112 study. We quantified the impact of these perturbations on the number, nucleation density ( $\rho =$   
113  $\frac{\text{number of inclusion}}{\text{Cytoplasm Area}}$ ,  $\mu\text{m}^{-2}$ ), size, shape, dynamics, supersaturation ( $S = \ln \frac{C_{\text{dilute}}}{C_{\text{saturation}}}$ , in which  
114  $C_{\text{saturation}}$  is the concentration above which molecules demix from an homogenous system), and  
115 the Gibbs free energy of partition (henceforth called free energy,  $\Delta G = -RT \ln K$ , in which  $K = \frac{C_{\text{dense}}}{C_{\text{dilute}}}$   
116 is the partition coefficient). Material concentrations inside ( $C_{\text{dense}}$ ) and outside ( $C_{\text{dilute}}$ ) viral  
117 inclusions were measured using the analytical strategies described in (Riback et al., 2020;  
118 Shimobayashi et al., 2021) and shown in **Figure 1B** (and validated in **S3A-H**). For this, we used  
119 the mean fluorescence intensity (MFI) of NP as proxy of vRNP concentration (Amorim et al., 2011;  
120 Vale-Costa et al., 2016), as it is well established that the majority of cytosolic NP is in the form of  
121 vRNPs (Amorim et al., 2011; Avilov et al., 2012; Einfeld et al., 2011; Momose et al., 2011).  
122 Our goal was to identify which perturbations translated into significant shifts in  $\Delta G$  to further  
123 explore whether these resulted in dramatic alterations in the material properties of viral inclusions,  
124 by assessing their kinetics and dynamics (**Figure 1C**) and determine how they impact viral  
125 replication *in vivo* (**Figure 1D**).

126

### 127 Changes in temperature mildly perturb IAV inclusions.

128 Cellular steady state is maintained at a narrow permissive physiological range, including of  
129 temperature. However, biomolecular condensates respond to fluctuations in temperature, and we  
130 took advantage of this to assess the entropic contribution of free energy and evaluate whether

131 regulating host cell metabolism could offer future solutions to harden IAV liquid inclusions (**Figure**  
132 **2A**). For this, we quantitatively analysed the viral inclusions formed in cells incubated at 4 °C, 37  
133 °C and 42 °C for 30 minutes at 8 hours post-infection (hpi) (representative images in **Figure 2B**).  
134 Although this short duration in temperature shift is not expected to alter the levels of cytosolic  
135 vRNPs, we observed an increase in vRNP amount in the cytosol at 42 °C and a decrease at 4°C  
136 (**Figure 2C**). This could be due to the NP antibody having different access to its antigen in IAV  
137 inclusions with different morphologies. Increasing the temperature from 37° to 42°C did not  
138 significantly change the number (**Figure 2D-E**), size (**Figure 2G-J**) or aspect ratio (**Figure 2K-L**)  
139 of viral inclusions but decreased the concentration of vRNPs in condensates ( $C_{\text{dense}}$ ) (**Figure 2F-**  
140 **I**, **Table S1**(sheet1)). Importantly, this increase in temperature modestly destabilized the structure,  
141 as observed by an increase in Gibbs free energy ( $-3571 \pm 446.1 \text{ J.mol}^{-1}$  @ 37 °C to  $-2659.5 \pm$   
142  $398.1 \text{ J.mol}^{-1}$  @ 42 °C, mean  $\pm$  SD, **Figure 2 M-O**, **Table S1** (sheet1)). These alterations are  
143 consistent with heat disruption of molecular interactions leading to disassembly of IAV inclusions  
144 with temperature. Conversely, decreasing the temperature until 4°C leads to an increase in the  
145 number and size of inclusions (shift in area from  $0.14 \pm 0.027 \mu\text{m}^2$  at 37 °C to  $0.2 \pm 0.03$  at 4°C,  
146 **Figure 2D,E. J** and **Table S1** (sheet1)), as well as in the concentration of vRNPs in inclusions  
147 ( $C_{\text{dense}}$  at 37°C of  $44.4 \pm 6.66 \text{ AU}$ , mean  $\pm$  sd, and at 4°C of  $63.2 \pm 6.40 \text{ AU}$ , **Table S1** (sheet1)),  
148 and does not significantly change the stability of IAV inclusions as determined by Gibbs free  
149 energy ( $-3658 \pm 410.2 \text{ J.mol}^{-1}$  @ 4 °C, **Figure 2M-O**).

150

### 151 **Changes in concentration of viral inclusions' drivers do not impact their liquid profile.**

152 Two factors were shown to drive the formation of IAV inclusions - vRNPs and Ras-related in brain  
153 11a (Rab11a) (Alenquer et al., 2019; Amorim et al., 2011; Eisfeld et al., 2011; Lakdawala et al.,  
154 2014; Vale-Costa et al., 2016; Veler et al., 2022). In fact, vRNP accumulation in liquid viral  
155 inclusions requires its association with Rab11a directly via the viral polymerase PB2 (Amorim et  
156 al., 2011; Veler et al., 2022), and the liquid character is maintained by an incompletely understood  
157 network of intersegment interactions bridging several cognate vRNP-Rab11 units on flexible  
158 membranes (Vale-Costa et al., 2016). As the concentration of material is a key determinant for  
159 the physical properties of condensates (Hernandez-Vega et al., 2017; Riback et al., 2020; Weber  
160 and Brangwynne, 2015), we evaluated how concentration of these two drivers impacts the  
161 behaviour of IAV inclusions.

162 For this, we took advantage of the fact that vRNP levels increase during infection (Kawakami et  
163 al., 2011), and we analysed viral inclusions over a time course, in two conditions: with endogenous  
164 levels of Rab11a (using cells expressing GFP, **as in (Alenquer et al., 2019)**) and overexpressing

165 Rab11a (in the form of GFP-Rab11a, as in (Alenquer et al., 2019)) (Figure 3A-B, Figure S2).  
166 With this approach, we aimed at analysing whether the material properties of viral inclusions  
167 changed over time and whether increasing the levels of Rab11 would alter these properties. This  
168 strategy would reveal if regulating Rab11a activity could harden IAV liquid inclusions.  
169 In GFP expressing cells, as the progeny vRNP pool reaches the cytosol (Figure 3A,C), viral  
170 inclusions augment in size (from  $0.172 \pm 0.04$  to  $0.289 \pm 0.06 \mu\text{m}^2$ , mean  $\pm$  SD, Figure 3D), with  
171 similar aspect ratio (Figure S1A,B). There is a mild reduction in the number of inclusions from  
172 8hpi onwards, as measured by the nucleation density ( $\rho$ ) (Figure 3E, S1C, all topological data in  
173 Table S1 (sheet2)). As infection progresses, the concentration of vRNPs inside condensates  
174 increases until 8 hpi (Figure 3F and S1D,E), accompanied by an increase in the diluted cytosolic  
175 phase (Figure 3G and S1D,F, Table S1(sheet2)), and both parameters stabilise thereafter,  
176 indicating that the critical concentration occurs around 8 hpi. Importantly, Gibbs free energy  
177 (normalised to 3 hpi) is lowest at 6 hpi ( $-1799.0 \pm 623 \text{ J.mol}^{-1}$ ) and destabilises mildly onwards ( $-$   
178  $1139.8 \pm 382$ ,  $-1131.2 \pm 444$  and  $-833.8 \pm 342 \text{ J.mol}^{-1}$  @ 8, 12 and 16 hpi, respectively) (Figure  
179 3H, S1G,H, Table S1 (sheet2)). These results are consistent with the increase in cytosolic vRNP  
180 leading to bigger sized inclusions that overall maintain the same concentration although becoming  
181 modestly destabilised, suggesting that the material properties are also modestly affected. When  
182 overexpressing Rab11a (right side of each graph), cytosolic vRNPs also accumulated in viral  
183 inclusions that increased with infection (Figure 3C-D, from  $0.243 \pm 0.03$  to  $0.385 \pm 0.04 \mu\text{m}^2$ ), but  
184 were significantly bigger than viral inclusions in GFP expressing cells, revealing a higher  
185 nucleation density (Figure 3E and S1C) and similar aspect ratio (Figure S1A,B),  $C_{\text{dense}}$  (Figure  
186 3F and S1D,E) and  $C_{\text{dilute}}$  (Figure 3G and S1D,F). The lowest value of Gibbs free energy occurs  
187 at 8 hpi ( $-1337.7 \pm 331 \text{ J.mol}^{-1}$ ) and destabilises from then onwards ( $-1145.3 \pm 443$  and  $-895.3 \pm$   
188  $394 \text{ J.mol}^{-1}$  @ 12 and 16 hpi, respectively, Figure 3H, S1G,H, all thermodynamic data in Table  
189 S1(sheet3)). This is consistent with Rab11a overexpression giving rise to bigger viral inclusions  
190 that overall contained the same vRNP concentration and destabilise slightly later. Importantly, in  
191 the two conditions and over the course of infection, viral inclusions maintained a liquid character  
192 with fusion and fission events taking place (Figure 3I, Movies S1-2). Therefore, these data  
193 indicate that altering the concentration of vRNPs and/or Rab11a affects the size but modestly  
194 impact IAV inclusions' material properties.

195

### 196 **The increase in type/strength of vRNP interactions dramatically stabilizes IAV inclusions.**

197 Another critical regulator of condensate properties is the type and strength of interactions among  
198 its components interact (Alberti and Hyman, 2021). Therefore, we predict that oligomerizing

199 vRNPs to each other, or to Rab11a, will change the viscoelasticity of condensates in similar  
200 manner to iPOLYMER in intracellular hydrogels (Nakamura et al., 2018). For IAV, it was shown  
201 by many independent groups that the drug nucleozin operates as a pharmacological sticker that  
202 oligomerizes all forms of NP (Amorim et al., 2013; Kao et al., 2010; Nakano et al., 2021). In fact,  
203 it was demonstrated that this drug has affinity for 3 different sites in NP (Kao et al., 2010)  
204 chemically polymerizing NP either, free or in vRNPs, in a reversible manner (Amorim et al., 2013).  
205 Interestingly, nucleozin was described as a novel class of influenza antivirals targeting the viral  
206 protein NP, potently inhibiting IAV replication in cultured cells and in a mouse model of influenza  
207 infection (Cianci et al., 2012). However, it readily evolved escape mutant viruses carrying the  
208 single substitution Y289H in NP (Kao et al., 2010). Despite its capacity to evolve resistance, our  
209 strategy is to take advantage of a well-known tool to probe the effects of increasing the number  
210 and type of intra and inter-vRNP interactions in the material properties of IAV inclusions (**Figure**  
211 **4A**).

212 With this reasoning, we evaluated the thermal stability of inclusions in the presence or absence  
213 of nucleozin in order to confirm its pharmacological sticker activity (Sridharan et al., 2019). It is  
214 well established that increasing temperature shifts a thermodynamics system to a homogeneous  
215 mix. In agreement, when we exposed IAV infected cells to a range of temperatures (4°C, 37°C  
216 and 42°C), we found that higher temperatures yield smaller inclusions tending towards its  
217 homogenous distribution in the cytoplasm (**Figure 2, S2**). Interestingly, when infected cells were  
218 exposed to the same thermal conditions after nucleozin treatment, inclusions were irresponsive  
219 to thermal fluctuation, maintaining their stability (**Figure S2**).

220 Next, we tracked how nucleozin affected IAV liquid inclusions, by imposing the infected cells to  
221 this drug for different periods ranging from from 5 min to 2h. We observes that nucleozin-treated  
222 inclusions form a multi-shaped meshwork unlike the rounded liquid droplets formed without  
223 nucleozin (**Figure 4B**). Nucleozin affected the concentration of vRNPs in the cytosol that  
224 decreased with the time of treatment (**Figure 4C**), presumably by blocking vRNP nuclear export  
225 and/or changes accessibility of antibodies to oligomerized NP. Conversely, nucleozin-treatment  
226 increased the size of viral inclusions (from  $0.284 \pm 0.04$  without nucleozin to  $1.02 \pm 0.18 \mu\text{m}^2$  with  
227 2 h treatment, **Figure 4D**), which lost circularity ( $0.893 \pm 0.02$  without nucleozin to  $0.761 \pm 0.02$   
228 2h treatment) and roundness ( $0.734 \pm 0.01$  without nucleozin to  $0.672 \pm 0.02$  with 2h treatment,  
229 **Figure 4E-F**) and decreased in number (from  $366.2 \pm 133,6$  to  $48.1 \pm 34.0$  after 2h treatment  
230 **Figure 4G,H**), suggesting that they were stiffer. Interestingly,  $C_{\text{dense}}$  increased dramatically (from  
231  $2125.8 \pm 0.09$  without nucleozin to  $3650.0 \pm 0.03$  with 2h nucleozin), **Figure 4I-K**) and  $C_{\text{dilute}}$   
232 decreased and became stable after 20 min treatment (from  $766.2 \pm 213.0$  without nucleozin to



233 330.2 ± 94.0 after 2h treatment, **Table S1** (sheet4, total  $C_{dilute}$ ), **Figure 4J**, L-M). Importantly, these  
234 structures were energetically more stable, with lower free energy (from  $-1711.1 \pm 397 \text{ J.mol}^{-1}$   
235 without nucleozin to  $-5388.4 \pm 808 \text{ J.mol}^{-1}$  2 h post nucleozin addition (**Figure 4N-O**, all topological  
236 and thermodynamic values in **Table S1** (sheet 4)).

237 Together, the data suggest that stabilizing vRNP interactions changes inclusions more efficiently  
238 than the other strategies tested above.

239

#### 240 **Modifiers of strength/type of interactions between vRNPs harden liquid IAV inclusions**

241 Changing the strength of interactions amongst vRNPs impacted viral inclusions' thermodynamics  
242 the most. Therefore, we next sought to assess if nucleozin altered their material properties. We  
243 first checked if nucleozin-treated viral inclusions maintained the ability to dissolve upon shock  
244 treatments, as illustrated in **Figure 5A**. We observed that native inclusions responded to shock  
245 treatment as expected, however, nucleozin strongly held inclusions together that did not dissolve  
246 when exposed to either hypotonic or 1,6-hexanediol shock treatments (**Figure 5B, C**). This  
247 unresponsiveness to shock suggests that IAV inclusions undergo hardening when vRNP  
248 interactions are stronger.

249 To formally establish that IAV liquid inclusions can be hardened, we compared the dynamics of  
250 viral inclusions in the presence or absence of nucleozin using four different approaches. First, we  
251 assessed their movement and measured speed and displacement from their point of origin  
252 (**Figure 5D**). Native liquid inclusions (treated with sham vehicle - DMSO) display a highly  
253 stochastic movement and long displacement, whilst nucleozin-hardened inclusions were less  
254 mobile with smaller displacement, as observed by analysing loss of movement in individual tracks  
255 (**Figure 5E**). There is an overall reduction in mean square displacement (MSD) with nucleozin  
256 (**Figure 5F**) that results in a lower MSD at 100 sec ( $\text{MSD}_{100\text{sec}} = 0.838 \pm 1.17 \mu\text{m}^2$  without nucleozin  
257 shifting to  $0.057 \pm 0.22 \mu\text{m}^2$  with treatment, median ± SD, **Figure 5F-G** and **Table S1** (sheet 5)).

258 In a second approach, we measured the time that two droplets take to relax to a sphere upon  
259 fusion by coarsening assays (shifting the aspect ratio from 2 to 1, **Figure 5H**). DMSO-treated  
260 inclusions relax fast to a single sphere upon fusion ( $5.8 \pm 1.94 \text{ s}$ ; mean fusion time ± SEM), shifting  
261 the aspect ratio from 2 to 1. Nucleozin-treated inclusions retain a stable aspect ratio over time  
262 (**Figure 5I**), as they are unable to fuse (**Figure 5I-K**, **Table S1** (sheet 6), **Movie S3,4**). The results  
263 demonstrate that nucleozin stiffens IAV inclusions.

264 In a third approach, inclusion molecular dynamics was tested by Fluorescence Loss After  
265 Photoactivation (FLAPh, **Figure 5L**). In a live imaging experiment, a region of interest (ROI) was  
266 photoactivated (**Figure 5M**), its decay profile monitored for 120 sec and the plot fitted to a single

267 exponential model. DMSO- and nucleozin-treated inclusions exhibited distinct decay profiles  
268 (**Figure 5N**), with half-life of  $14.41 \pm 0.9$  s (mean  $\pm$  SEM) and  $85.02 \pm 19.8$  s, respectively (**Figure**  
269 **5O**, **Table S1** (sheet 7) and **Movie S5,6**). This indicates that nucleozin treated inclusions become  
270 more static.

271 Lastly, we measured the internal rearrangement in viral inclusions. Because of the small size and  
272 highly dynamic nature of IAV inclusions, previous attempts to perform Fluorescence Recovery  
273 After Photobleaching (FRAP) experiments resulted in highly variable recovery rates (Alenquer et  
274 al., 2019; Amorim et al., 2011) that were unable to accurately determine if internal rearrangements  
275 were taking place viral inclusions. As the microtubule depolymerising drug nocodazole largely  
276 blocks the movement of IAV inclusions, rendering them larger and more spherical (Amorim et al.,  
277 2011; Avilov et al., 2012), we opted for bleaching IAV inclusions upon treating them with  
278 nocodazole (**Figure 5P**). In native conditions, the photobleached region quickly disappeared,  
279 consistent with internal rearrangement of vRNPs inside IAV inclusions, whilst in nucleozin-treated  
280 inclusions, the photobleached area remained unaltered, revealing stiffness (several examples in  
281 **Figure 5Q** and **Movie S7,8**).

282 Taken together, DMSO- and nucleozin-treated IAV inclusions exhibit distinct responses to shocks,  
283 dynamics, internal rearrangement and coalescing properties, supporting that nucleozin hardens  
284 IAV liquid inclusions.

### 285 286 **Modifiers of strength/type of interactions between vRNPs hardens IAV liquid inclusions *in*** 287 ***vivo***

288 Recently, the condensate-hardening drugs steroidal alkaloid cyclopamine and its chemical  
289 analogue A3 were shown to reduce viral titres in respiratory syncytial virus (RSV) infected mice  
290 (Risso-Ballester et al., 2021). However, at the organismal level, it was not demonstrated that RSV  
291 inclusion bodies in infected cells retained hardened features. To test if we could phenocopy the  
292 *in vitro* function of nucleozin, we aimed at analysing vRNP morphology inside the lung cells of  
293 infected mice. For this, we challenged mice with the IAV strain X31 for 2 days. At 30 min, 1 h or  
294 2 h before the collection of the lungs, each mouse was treated with PBS (sham vehicle) or  
295 nucleozin, administered intranasally (**Figure 6A-C**). Interestingly, when we analysed viral  
296 inclusions under control conditions in cells of lungs of infected mice, we observed a punctate-like  
297 NP distribution. Upon nucleozin treatment, these cytosolic inclusions grew larger (inclusions per  
298 cell mean  $\pm$  SEM: Ncz 30 min,  $0.101 \pm 0.006 \mu\text{m}^2$ ; 2h,  $0.226 \pm 0.012 \mu\text{m}^2$ , **Figure 6B**, **Table S1**  
299 (sheet 8)). This indicates that the pharmacological induced sticker activity of nucleozin (Amorim  
300 et al., 2013; Kao et al., 2010) was retained *in vivo*. Having seen an effect in vRNP cytosolic

301 localization *in vivo*, we aimed at confirming a nucleozin-dependent abrogation of IAV infection in  
302 our system as reported before (Kao et al., 2010). In fact, nucleozin was reported to affect viral  
303 titres by 1 log and increase survival of IAV (A/Vietnam/1194/04 H5N1) infected mice by 50%. For  
304 this, we therefore challenged nucleozin pretreated mice with X31 and treated with a daily dose of  
305 PBS (sham vehicle) or nucleozin and found that nucleozin-treated mice had a faster recovery  
306 from viral infection (**Figure 6D**). In sum, the data serves as proof of concept that the material  
307 properties of condensates may be targeted *in vivo*.

308

### 309 **Nucleozin rescues formation of hardened IAV inclusions in the absence of Rab11a**

310 Given the possibility to harden IAV inclusions, it is important to define the molecular mechanisms  
311 conferring the material properties of these condensates, which remain elusive. As Rab11a drives  
312 the formation of IAV inclusions (Alenquer et al., 2019; Amorim et al., 2011; Einfeld et al., 2011;  
313 Lakdawala et al., 2014; Vale-Costa et al., 2016; Veler et al., 2022), we asked if nucleozin could  
314 artificially reform viral inclusions and mimic its behaviour in the absence of Rab11a. Stable cell  
315 lines expressing Rab11a dominant negative (DN) (henceforward Rab11a-DN) did not form IAV  
316 inclusions, as expected, maintaining vRNPs dispersed throughout the cytosol (**Figure 7A**).  
317 Interestingly, both Rab11a-WT and Rab11a-DN cell lines, in the presence of nucleozin, exhibited  
318 cytosolic puncta (despite smaller in Rab11a-DN lines, (**Figure 7A-B**)). This indicates that  
319 nucleozin bypasses the need for Rab11a to concentrate vRNPs, forming aberrant inclusions as  
320 predicted. We next tested the fusion ability of nucleozin-induced IAV inclusions in Rab11a-DN  
321 cell lines. Unlike native inclusions in WT cells, nucleozin-induced IAV inclusions in Rab11a-DN  
322 infected cells are not able to fuse in coarsening assays (**Figure 7C-E**). In sum, the liquid properties  
323 of IAV inclusions derived from flexible intersegment interactions and interaction with Rab11a  
324 harden to form stiff aggregates upon nucleozin treatment even when active Rab11a is absent.

325

### 326 **Nucleozin affects vRNP solubility in a Rab11a-dependent manner without altering host** 327 **proteome profile**

328 Next, to understand how both the viral and host proteomes remodel in response to nucleozin  
329 treatment, we used a recently developed quantitative mass spectrometry-based approach called  
330 solubility proteome profiling (SPP) (Sridharan et al., 2019). This is a lysate centrifugation assay,  
331 which can distinguish the soluble (supernatant) from insoluble (dense assemblies) protein pools.  
332 The majority of proteins annotated to be part of membraneless organelles, as well as many  
333 cytoskeletal proteins, exhibit prominent insolubility. In SPP, two aliquots of cellular lysates are  
334 extracted with either a strong (SDS) or a mild (NP40) detergent. Protein extracted with SDS

335 represent the total proteome, while the supernatant of NP40-extracted lysate represents the  
336 soluble sub-pool. The ratio of NP40- and SDS-derived protein abundance represents the solubility  
337 of a protein (**Figure 8A**). Protein solubility is a proxy to track phase transition events in different  
338 cellular states. However, this measurement cannot distinguish between different events, such as  
339 solidification, phase separation, percolation and gelation (Alberti and Hyman, 2021) that may  
340 underlie the phase transition.

341 To define the effect of nucleozin in viral inclusions, we compared proteome abundance and  
342 solubility profiles of Rab11a-DN cell lines, where the formation of liquid inclusion is blocked, with  
343 that of Rab11a-WT cell lines at 12 hpi, in the absence or presence of nucleozin (1 h treatment)  
344 (**Figure 8A-E, Table S2,3**). Nucleozin-treatment did not induce significant alteration in host  
345 proteome abundance in both cell lines (**Figure 8B**). Similarly, no major changes in terms of protein  
346 solubility were observed for the host proteome during this treatment period (**Figure 8B**). Overall,  
347 our results suggest that nucleozin does not induce changes in cellular protein levels or their  
348 solubility.

349 In terms of the viral proteome, the abundance of all protein components of vRNPs (NP, PB1, PB2,  
350 PA and M1) show a modest increase in Rab11a-DN cell lines (**Figure 8C**). On the solubility level,  
351 NP exhibited a prominent change. NP remains more soluble in Rab11a-DN lines compared to  
352 Rab11a-WT infected cells (fold change of 0.188,  $P = 7.97E-6$ , **Figure 8C**). This corroborates the  
353 observation that vRNPs remain uniformly distributed in Rab11a-DN cells. Upon nucleozin  
354 treatment, SPP data reveal that the solubility of NP remains unaltered in Rab11a-WT cells, while  
355 increasing the proportion of NP in insoluble pool in Rab11a-DN cells (**Figure 8D-E, red square**).  
356 Although there were no changes in solubility by SPP, we observed IAV inclusions growing larger  
357 and hardening upon nucleozin treatment at the microscopic level in Rab11a-WT cells (**Figure**  
358 **7A**). This can be explained, as vRNPs are already insoluble in viral inclusions before nucleozin  
359 treatment and the net increase in size of the inclusions does not result in higher insolubility of  
360 vRNPs. Both SPP and microscopy complement each other in the case of Rab11a-DN cells, as  
361 viral inclusions change from soluble to insoluble and become bigger upon nucleozin treatment.  
362 Overall, these data substantiate our finding that vRNPs form Rab11a-dependent insoluble and  
363 liquid inclusions that undergo a distinctive (aberrant) phase transition upon nucleozin treatment.

## 364 **DISCUSSION**

365 In thermodynamics, the demixing from the surrounding media implies a preference of alike  
366 molecules to interact and self-sort, excluding the milieu. This is well understood for binary systems  
367 but deviate considerably for multicomponent systems, even *in vitro* (Klosin et al., 2020; Riback et

368 al., 2020; Snead et al., 2022). How living cells, that are complex multicomponent systems at non-  
369 equilibrium, operate lacks understanding. Small alterations in the interactions, caused by changes  
370 in the environment or the interactome of the condensate, originate different self-assembled  
371 structures (Riback et al., 2020) that respond distinctly to thermodynamic variables such as  
372 concentration, temperature and type/strength of interactions. For example, increasing the  
373 concentration in a system is mostly associated with more ordered, less flexible structures,  
374 however higher ordered structures were reported to arise in response to a concentration reduction  
375 (Helmich et al., 2010). Therefore, understanding how physical modulators of phase transitions  
376 impact the properties of condensates is key to comprehend how biological systems may be  
377 regulated, which is essential for, for example, designing condensate-targeting drugs with specific  
378 activities (Hermans et al., 2009). IAV infection forms cytosolic liquid inclusions that are sites for  
379 genome assembly. Our study to address the fundamental question of whether the material  
380 properties of IAV inclusions may be modulated, shows that IAV inclusions may be hardened by  
381 targeting vRNP interactions but not by lowering the temperature down to 4 °C nor by altering the  
382 concentration of the factors that drive their formation. The data on temperature reveals that a  
383 decrease in the entropic contribution leads to a growth of condensates, as observed for other  
384 systems (Falahati and Haji-Akbari, 2019; Hyman et al., 2014; Riback et al., 2020), that is,  
385 however, mild and does not significantly impact the stability of the structures. Similarly, altering  
386 the concentration of drivers of IAV inclusions impact their size but not their material properties.  
387 This is unexpected because many studies have shown that changing the temperature or  
388 concentration of condensate drivers dramatically impacts their phase diagrams (Bracha et al.,  
389 2018; Riback et al., 2020; Zhu et al., 2019) and material properties (Shin et al., 2017). For  
390 influenza, these minor effects demonstrate that is system is flexible, which may result from the  
391 necessity to maintain the liquid character over a wide range of vRNP concentration in the cytosol  
392 (low levels in the beginning and high at late stages of infection). The maintenance of the liquid  
393 character may be a regulated process involving fission and fusion events associated with the ER,  
394 as reported for other systems (Lee et al., 2020). In fact, IAV liquid inclusions develop in proximity  
395 to a particular part of a modified endoplasmic reticulum (ER) (de Castro Martin et al., 2017), the  
396 ER exit sites (Alenquer et al., 2019). In addition, the fusion and fission events of inclusions may  
397 be necessary to promote vRNP interactions, which is essential for genome assembly, as  
398 proposed before (Eisfeld et al., 2015; Lakdawala et al., 2014).

399 Defining the rules for hardening the condensates is important for understanding how biological  
400 condensates may be manipulated in cells and has consequences for development of novel  
401 antiviral treatments. By demonstrating that targeting the type/strength of interactions modulates

402 the material properties of liquid viral inclusions in *in vitro* and *in vivo* models, we show that the  
403 development of molecules that affect the interactions between two components (such as post-  
404 translational modifications, local pH or ionic strength or pharmaceutical stickers/spacers) should  
405 be prioritized over those increasing their concentration or local entropy. Such targeting may  
406 prevent off-target effects, especially by developing compounds able to distinguish free vRNP  
407 components from those in the supramolecular complex. In fact, the solubility proteome profiling  
408 herein reported demonstrates that it is possible to harden a liquid condensate without imposing  
409 changes in the host proteome abundance and solubility, which is important to increase specificity.  
410 However, a cost of targeting conserved molecules is the evolution of escape mutants (Cheng et  
411 al., 2012; Hu et al., 2017; Kao et al., 2010). Therefore, a concern to address in the future is how  
412 to design suitable combinatorial therapies able to reduce their emergence. Since single nucleotide  
413 mutations underpin numerous resistance mechanisms to antivirals (Lampejo, 2020), an  
414 alternative is to engineer condensate hardening drugs that require multiple amino acid changes  
415 for escaping.

416 In this work, we explored the rules for hardening IAV liquid condensates. Other alternatives to  
417 modulate the material properties tailored for function can be developed. For example,  
418 accumulating evidence shows that blocking viral inclusion formation hinders viral infection  
419 (Amorim, 2019; Amorim et al., 2011; de Castro Martin et al., 2017; Einfeld et al., 2011; Han et al.,  
420 2021; Momose et al., 2011; Vale-Costa et al., 2016; Vale-Costa and Amorim, 2017; Veler et al.,  
421 2022). Herein, we observe that increase in temperature biases the system to dissolving viral  
422 inclusions, therefore activating exothermic reactions close to IAV inclusions may lead to their  
423 dissolution. Furthermore, it has been previously demonstrated that blocking Rab11 pathway,  
424 directly or indirectly, hampers viral infection (Amorim et al., 2011; Einfeld et al., 2011; Han et al.,  
425 2021; Momose et al., 2011). Future research could also explore this route. As Rab11a has  
426 emerged as a key factor for the replication of members of many unrelated viral families relevant  
427 for human health (*Bunyaviridae*, *Filoviridae*, *Orthomyxoviridae*, *Paramyxoviridae* and  
428 *Pneumoviridae*), targeting its activity may serve as a pan-antiviral strategy (Amorim et al., 2011;  
429 Bruce et al., 2010; Cosentino et al., 2022; Nakatsu et al., 2013; Nanbo and Ohba, 2018).

430

### 431 **Limitations of the study**

432 Understanding condensate biology in living cells is physiological relevant but complex because  
433 the systems are heterotypic and away from equilibria. This is especially challenging for influenza  
434 A liquid inclusions that are formed by 8 different vRNP complexes, which although sharing the  
435 same structure, vary in length, valency, and RNA sequence. In addition, liquid inclusions result

436 from an incompletely understood interactome where vRNPs engage in multiple and distinct  
437 intersegment interactions bridging cognate vRNP-Rab11 units on flexible membranes (Chou et  
438 al., 2013; Gavazzi et al., 2013; Haralampiev et al., 2020; Le Sage et al., 2020; Shafiuddin and  
439 Boon, 2019; Sugita et al., 2013). At present, we lack an *in vitro* reconstitution system to  
440 understand the underlying mechanism governing demixing of vRNP-Rab11a-host membranes  
441 from the cytosol. This *in vitro* system would be useful to explore how the different segments  
442 independently modulate the material properties of inclusions, explore if condensates are sites of  
443 IAV genome assembly, determine thermodynamic values and thresholds accurately and validate  
444 our findings. One of the constraints of using cells in this work relates to the range and precision  
445 of the concentrations we can vary in our system. Herein, we compared endogenous Rab11a  
446 cellular levels to a single pool of transduced cells that contained low, but still heterogeneous,  
447 levels of Rab11a as a way to avoid toxicity and/or uncharacterized effects of overly expressing  
448 Rab11a in the cell. To minimize this limitation, we combined overexpressing Rab11a with a range  
449 of low and high levels of vRNPs (analysing the entire time course of infection) to understand if a  
450 combination of high levels of vRNPs and of Rab11a could synergistically change the material  
451 properties of IAV inclusions. Finally, technically we retrieved thermodynamic parameters (such as  
452  $C_{dense}$ ,  $C_{dilute}$ , shape, size) from images in z-stacks as the sum of slices at specific snapshots of  
453 infection. However, although requiring a very complex imaging analysis that we lack, in the ideal  
454 scenario, the analysis should have been done using the whole volumetry of each viral inclusion,  
455 and using live images quantified over time that is yet to be reported.

## 456 **ACKNOWLEDGEMENTS**

457 This project has received funding from the European Research Council (ERC) under the  
458 European Union's Horizon 2020 research and innovation programme (grant agreement No.  
459 101001521). Salary support from FCT : T.A.E, D.B., V.M. are funded by PhD fellowships  
460 (PD/BD/128436/2017, PD/BD/148391/2019 and UI/BD/152254/2021) and S.V.C by D.L. 57.

## 461 **AUTHOR CONTRIBUTIONS**

462 T.A.E., S.V.C, S.S., D.B., I.B., V.M., F.F., M.A, M.S., M.J.A designed and executed experiments  
463 and analysed the data. T.A.E AND M.J.A wrote the manuscript. M.J.A. initiated and designed the  
464 overall project. S.S., I.B., and M.S. designed, performed, and analysed the experiments of whole  
465 proteome solubility assay and T.A.E, D.B., S.V.C, F.F., M.A, M.J.A designed and executed  
466 experiments to validate hits. D.B., and M.J.A designed, performed, and analysed animal

467 experiments. T.A.E., V.M., M.J.A designed, performed, and analysed the framework on how the  
468 thermodynamic variables influence biophysical parameters and implemented the framework for  
469 analyses. T.A.E, S.V.C, M.J.A., designed, performed, and analyzed all live cell analyses. M.S and  
470 M.J.A. obtained funding for the study. All authors reviewed the manuscript.

471 **DECLARATION OF INTERESTS**

472 None.

473 **INCLUSION OF DIVERSITY**

474 One or more of the authors of this paper self-identifies as an underrepresented ethnic minority in  
475 science.

476



## 477 **FIGURE LEGENDS**

### 478 **Figure 1. Framework applied to define the rules for hardening IAV liquid inclusions or other** 479 **condensates.**

480 (A) To compare the contributions of entropy, concentration, and valency/strength/type of  
481 interactions, we subjected infected cells to the different perturbations, temperature, concentration  
482 of viral inclusion drivers (vRNPs and Ras-related in brain 11a (Rab11a)) and number or strength  
483 of interactions between different vRNPs using the well-studied vRNP pharmacological sticker,  
484 nucleozin.

485 (B) Our aim is to determine which amongst these perturbations impact more dramatically viral  
486 inclusions number, shape, size or Gibbs free energy of partition (free energy,  $\Delta G$ ). For this, we  
487 segmented circa 20 cells under the different conditions to measure the above-mentioned  
488 parameters and the amount of material inside ( $C_{\text{dense}}$ ) and outside ( $C_{\text{dilute}}$ ) viral condensates. With  
489 this, we calculated the partition coefficient  $K$  and extrapolated the  $\Delta G$ .

490 (C) When  $\Delta G$  dramatically changed, we assessed how perturbations altered the material  
491 properties of IAV inclusions by determining how fast and how much they moved (using coarsening  
492 assays, particle tracking, fluorescence recovery after photobleaching (FRAP) and fluorescence  
493 loss after photoactivation (FLAPh))

494 (D) We also assessed whether the phenotype could be recapitulated *in vivo* using mice infected  
495 with influenza A virus reassortant X31. The overall goal of this framework is to determine, for IAV,  
496 how liquid inclusions may be efficiently hardened to prioritize research and development of  
497 strategies with that activity. Additionally, the framework may be applied to other systems, including  
498 other viruses, for informed decisions on how to harden condensates.

499

### 500 **Figure 2. Thermal changes mildly perturb the material properties of inclusions.**

501 A549 were infected at a MOI of 3 with PR8 virus for 8 h, incubated at different temperatures (4°C,  
502 37°C, 42°C) for 30 min, fixed, and analysed by immunofluorescence using antibody staining  
503 against Rab11 and NP as a proxy for vRNP. The biophysical parameters were extracted from  
504 immunofluorescence images ( $n = 18 - 29$ ), adapting the method published by (Riback et al., 2020;  
505 Shimobayashi et al., 2021) to determine concentration  $C_{\text{dense}}$  as the mean fluorescence intensity  
506 of vRNPs in the segmented IAV inclusions, while concentration  $C_{\text{dilute}}$  was extrapolated from the  
507 cytoplasmic vRNP intensity outside the inclusions. Each dot is the average value of a measured  
508 parameter within or outside IAV inclusions per cell, while the continuous black lines are non-linear  
509 fitted models for all data. Also, size and shape of inclusion were extracted from inclusions after

510 image segmentation. Parameters that were normalized to an infection state without IAV inclusions  
511 (3hpi) are indicated by a dashed horizontal line. Above each boxplot, same letters indicate no  
512 significant difference between them, while different letters indicate a statistical significance at  $\alpha =$   
513 0.05. All data are displayed in **Table S1** (sheet1). Abbreviations: AU, arbitrary unit.  
514 (A) Representative depiction of the experimental analysis workflow.  
515 (B) Representative images of fixed A549 cells infected with PR8 virus showing alterations in viral  
516 inclusions at different temperatures.  
517 (C). Boxplot depicting the fold change in cytoplasmic to nuclear vRNP concentration;  $P = 0.0362$   
518 by one-way ANOVA followed by Tukey multiple comparisons of means.  
519 (D) Scatter plot of nucleation density ( $\rho = \frac{\text{number of inclusion}}{\text{Cytoplasm Area}}$ ,  $\mu\text{m}^{-2}$ ) versus degree of  
520 supersaturation ( $S = \ln \frac{C_{\text{dilute}}}{C_{\text{sat}}}$ ), as a measure of propensity to remain dispersed in the cytoplasm.  
521 (E) Boxplot showing number of viral inclusions per cell;  $P = 0.00118$  by one-way ANOVA, followed  
522 by Tukey multiple comparisons of means.  
523 (F) Scatter plot of vRNP concentration within inclusions ( $C_{\text{dense}}$ , AU) versus surrounding cytoplasm  
524 ( $C_{\text{dilute}}$ , AU).  
525 (G) Scatter plot of vRNP concentration in inclusion ( $C_{\text{dense}}$ , AU) versus area of inclusion ( $\mu\text{m}^2$ ).  
526 (H) Scatter plot of vRNP concentration within inclusions ( $C_{\text{dense}}$ , AU) versus its total cytoplasmic  
527 vRNP concentration ( $C_{\text{cytoplasm}}$ , AU).  
528 (I) Scatter plot of  $C_{\text{dilute}}$  (AU) versus total cytoplasmic vRNP concentration  $C_{\text{cytoplasm}}$  (AU).  
529 (J) Boxplot of viral inclusion area ( $\mu\text{m}^2$ ) per cell;  $P < 0.00387$  by Kruskal Wallis Bonferroni  
530 treatment.  
531 (K) Boxplot of aspect ratio of inclusions;  $P = 0.234$  by Kruskal Wallis Bonferroni treatment.  
532 (L) Scatter plot of inclusions circularity versus roundness.  
533 (M) Scatter plot of fold change in free energy of partition ( $\Delta\Delta G$ ,  $\text{J}\cdot\text{mol}^{-1}$ ) where  $\Delta G = -RT \ln K$ , and  
534  $K = \left(\frac{C_{\text{dense}}}{C_{\text{dilute}}}\right)$ , and  $\Delta\Delta G = \Delta G - \Delta G_{3 \text{ hpi}}$ , versus vRNP concentration in the cytoplasm outside viral  
535 inclusions ( $C_{\text{dilute}}$ , AU)  
536 (N) Boxplot of  $\Delta\Delta G$  ( $\text{J}\cdot\text{mol}^{-1}$ );  $P < 8.01\text{e-}16$  by one-way ANOVA followed by Tukey multiple  
537 comparisons of means.  
538 (O) Scatter plot of relative fold change in  $\Delta\Delta G$  versus area of inclusion ( $\mu\text{m}^2$ ).

539

540 **Figure 3. Changes in concentration of vRNPs and Rab11a modestly alter the material**  
541 **properties of viral inclusions.**

542 (A - H) A549 cells stably expressing GFP, or Rab11a-WT were infected at a MOI of 3 with PR8  
543 virus and, at the indicated time points, were fixed, and analysed by immunofluorescence using an  
544 antibody against NP (as a proxy for vRNPs). (C - H) Each dot is the average value of measured  
545 parameters per cell, and the continuous black lines are non-linear fitted models for all data. Above  
546 each boxplot, same letters indicate no significant difference between them, while different letters  
547 indicate a statistical significance at  $\alpha = 0.05$  using one-way ANOVA, followed by Tukey multiple  
548 comparisons of means for parametric analysis, or Kruskal-Wallis Bonferroni treatment for non-  
549 parametric analysis. All thermodynamic related values are displayed in **Table S1** (sheets 2 and  
550 3). Abbreviations: AU, arbitrary unit.

551 (A) Representative depiction of the experimental analysis workflow.

552 (B) Immunofluorescence images of infected cells at different hours post-infection (hpi) (a proxy  
553 for changing cytoplasmic vRNP concentration) in cells overexpressing GFP (left) or GFP-Rab11  
554 (right) (both in green); NP (red), and nucleus (blue). Scale bar = 10  $\mu\text{m}$ .

555 (C) Boxplot depicting the fold change in the ratio of cytoplasmic to nuclear vRNPs concentration  
556 at different times of infection, with endogenous or overexpressed Rab11a;  $P < 0.001$ ; Kruskal  
557 Wallis Bonferroni treatment.

558 (D) Boxplot of inclusion area ( $\mu\text{m}^2$ ) per cell;  $P < 0.001$  by one-way ANOVA, followed by Tukey  
559 multiple comparisons of means.

560 (E) Scatter plot showing nucleation density ( $\rho$ ,  $\mu\text{m}^{-2}$ ) versus degree of supersaturation (S).

561 (F) Boxplot of  $C_{\text{dense}}$  (AU);  $P < 0.001$  by Kruskal Wallis Bonferroni treatment.

562 (G) Boxplot of  $C_{\text{dilute}}$  (AU);  $P < 0.001$  by Kruskal Wallis Bonferroni treatment.

563 (H) Boxplot of  $\Delta\Delta G$  ( $\text{J}\cdot\text{mol}^{-1}$ );  $P < 0.001$  by Kruskal Wallis Bonferroni treatment. Conditions were  
564 normalized to an infection state without IAV inclusions (3 hpi) that is indicated by the dashed  
565 black line.

566 (I) A549 cells stably expressing GFP, or Rab11a-WT were transfected with a plasmid encoding  
567 mCherry-NP and simultaneously co-infected with PR8 virus at an MOI of 10 and were live  
568 imaged at 12 – 16 hpi. Representative time lapse images of fission (blue arrow) and fusion  
569 (yellow arrow) dynamics of viral inclusions in cells with endogenous levels or overexpressing  
570 Rab11a (**Movie S1, S2**).

571

#### 572 **Figure 4. Increasing interaction number and strength stabilizes IAV inclusions.**

573 A549 cells were infected at a MOI of 3 with PR8 virus for 8 hrs, then incubated with 5 $\mu\text{M}$  of  
574 nucleozin (Ncz), a vRNP pharmacological sticker, for different time periods from 5mins to 2 h,  
575 before fixing. Cells were processed for immunofluorescence analysis, using antibodies against

576 NP and Rab11a. Each dot is the average value of a measured parameter per cell, while the  
577 continuous black lines are non-linear fitted models for all data. Conditions normalized to an  
578 infection state without IAV inclusions (3 hpi) are indicated by a dashed black horizontal line. Above  
579 each boxplot, same letters indicate no significant difference between them, while different letters  
580 indicate a statistical significance at  $\alpha = 0.05$  using one-way ANOVA, followed by Tukey multiple  
581 comparisons of means for parametric analysis, or Kruskal-Wallis Bonferroni treatment for non-  
582 parametric analysis. All the values calculated for the thermodynamics parameters have been  
583 included as **Table S1** (sheet 4). Abbreviations: AU, arbitrary unit, CM, complete media and Ncz,  
584 nucleozin.

585 (A) Representative depiction of the experimental and analysis workflow.  
586 (B) Representative images of infected A549 cells subjected (or not) to increasing periods of Ncz  
587 treatment. NP (green), Rab11a (red) and nucleus (blue). Scale bar =  $10\mu\text{m}$ .  
588 (C) Boxplot depicting the fold change in the ratio of cytoplasmic to nuclear vRNPs concentration  
589 before and after Ncz treatment at 8hpi;  $P = 6.16\text{e-}14$  by Kruskal Wallis Bonferroni treatment.  
590 (D) Boxplot of mean inclusion area per cell;  $P < 0.001$  by Kruskal Wallis Bonferroni treatment.  
591 (E) Boxplot of inclusion aspect ratio;  $P < 2\text{e-}16$  by Kruskal Wallis Bonferroni treatment.  
592 (F) Scatter plot of inclusion circularity versus roundness.  
593 (G) Boxplot showing the number of inclusions per cell;  $P < 0.001$  by Kruskal Wallis Bonferroni  
594 treatment.  
595 (H) Scatter plot of nucleation density ( $\rho$ ,  $\mu\text{m}^{-2}$ ) versus degree of supersaturation (S).  
596 (I) Boxplot showing increasing inclusion  $C_{\text{dense}}$  (AU) with increasing Ncz incubation period;  $P <$   
597  $0.001$  by Kruskal Wallis Bonferroni treatment.  
598 (J) Scatter plot of  $C_{\text{dense}}$  (AU) versus  $C_{\text{dilute}}$  (AU).  
599 (K) Scatter plot of  $C_{\text{dense}}$  (AU) and  $C_{\text{cytoplasm}}$  (AU).  
600 (L) Boxplot showing  $C_{\text{dilute}}$  (AU);  $P < 0.001$  by Kruskal Wallis Bonferroni treatment.  
601 (M) Scatter plot of  $C_{\text{dilute}}$  (AU) versus  $C_{\text{cytoplasm}}$  (AU). Coloured lines are non-linear fitted models of  
602 grouped data points in the graph.  
603 (N) Scatter plot of  $\Delta\Delta G$ ,  $\text{J}\cdot\text{mol}^{-1}$  versus  $C_{\text{dilute}}$ .  
604 (O) Boxplot of fold change in free energy of partition ( $\Delta\Delta G$ ,  $\text{cal}\cdot\text{mol}^{-1}$ );  $P < 0.001$ ; Kruskal Wallis  
605 Bonferroni treatment.

606  
607 **Figure 5. Increasing the strength/type of interactions between vRNPs changes the material**  
608 **properties of liquid IAV inclusions.**

609 (A – C) A549 cells were infected at a MOI of 3 with PR8 virus and treated with 5 $\mu$ M Ncz or DMSO  
610 at 7 hpi. An hour later, cells were treated for 30 min with 80% water (hypotonic shock, Hyp), with  
611 1,6-hexanediol (Hex) or complete media (CM) as control, before allowing recovery from stress  
612 treatment in CM for 1 h. Cells were fixed, stained for NP for analysis by immunofluorescence and  
613 the percentage of cells with IAV inclusions was scored manually. (D - K, P - Q) A549 cells were  
614 infected with PR8 virus at an MOI of 10 and simultaneously transfected with plasmids encoding  
615 (D - G) GFP-NP, (H - K) mcherry-NP, or (L -O) photoactivatable GFP-NP and mcherry-NP. Cells  
616 were then live imaged after 12 hpi.

617 (A) Experimental schematics of inclusion shock assay.

618 (B) Representative images showing the response of IAV inclusions (NP, as proxy) to shock  
619 treatments after incubation in Ncz or DMSO. Scale Bar = 10  $\mu$ m.

620 (C) Boxplot showing percentage cells with inclusions, after DMSO or Ncz treatment, by manual  
621 scoring;  $P < 0.001$  by Kruskal Wallis Bonferroni treatment.

622 (D) Scheme showing how IAV inclusions were tracked over time.

623 (E) Plot showing inclusion (GFP-NP, as proxy) particle trajectory when treated with DMSO or Ncz.

624 (F) Graph showing the mean square displacement ( $\mu\text{m}^2$ ) versus time (sec) of IAV.

625 (G) Boxplot depicting the resulting mean square displacement ( $\mu\text{m}^2$ ) after 100 sec tracking of IAV  
626 inclusions;  $P < 0.001$  by Kruskal Wallis Bonferroni treatment.

627 (H) Schematics of the coarsening assay model, in which liquid and hardened IAV inclusions are  
628 represented by orange and blue dots, respectively. Unlike hardened inclusions, native liquid  
629 inclusions would fuse and relax to a spherical droplet.

630 (I) Aspect ratio (AR) was used as a measure of IAV inclusion coalescence into a sphere. Mean  
631 AR per time was fitted to a linear model (bold coloured lines). Horizontal grey dash lines depict a  
632 perfect sphere (aspect ratio = 1).

633 (J) Pseudo-colored time-lapse images of coalescing viral inclusions (GFP-NP used as proxy;  
634 extracted from Movie S3,4) in the presence or absence of Ncz.

635 (K) Boxplot of the fusion time (sec) of IAV liquid inclusions. Dots represent fusion time of individual  
636 fusion event.

637 (L) Schematic of a fluorescence loss after photoactivation (FLAPh) experiment.

638 (M) Time-lapse pseudo-colour images showing the fluorescence loss in photoactivated IAV  
639 inclusions (photoactivatable GFP-NP used as proxy) upon treatment with Ncz or DMSO  
640 (extracted from Supplementary Movie S5,6). Bar = 2  $\mu$ m.

641 (N) Fluorescence intensity decay of photoactivated (PhotoGFP-NP) normalised to the  
642 corresponding IAV inclusions expressing mcherry-NP. Coloured lines are single exponential

643 model fitting ( $y_0 = (1-a) + ae^{-kt}$ ) of the data point, dots are the mean of the data per second, and  
644 vertical lines denote the standard deviation (SD) per time (s).

645 (O) Half-life ( $t_{1/2} = \frac{\ln(2)}{k}$ ,  $k = \text{rate constant}$ ) of liquid and hardened IAV inclusions decay post-  
646 activation (sec);  $P = 1.386e-6$  by Kruskal Wallis Bonferroni treatment.

647 (P) Schematic depiction of an internal rearrangement of viral inclusion after a ROI within the  
648 inclusion is FRAPed.

649 (Q) A549 cells were transfected with plasmids encoding mcherry-NP and co-infected with PR8  
650 virus at an MOI of 10. At 12hpi, cells were treated with nocodazole (10  $\mu\text{g}/\text{mL}$ ) for 2h to reduce  
651 the highly stochastic motion of liquid IAV inclusions and subsequently treated with DMSO or Ncz.  
652 Small regions inside IAV inclusions were photobleached to assess internal rearrangement of  
653 vRNPs (mCherry-NP as proxy). Time lapse pseudocolor images shows the fluorescence recovery  
654 after photobleaching (FRAP, extracted from Supplementary Videos 7,8).

655

656 **Figure 6. Hardened inclusions emerge *in vivo* when infected mice are treated with**  
657 **nucleozin.**

658 (A - B) Mice were intranasally infected with 4000 plaque forming units (PFU) of X31 virus, and  
659 after 2 days were intraperitoneally injected with PBS or 8.3 nmoles/g mice of Ncz at 30 min, 1h  
660 or 2h before the collection of the lungs. Data were extracted from inclusions (NP, as proxy) from  
661 fixed immunofluorescence images of lung tissues.

662 (A) Representative immunofluorescence images show sections of lung tissue stained for NP (red)  
663 and nucleus (blue) after PBS or Ncz treatment.

664 (B) Boxplot showing the mean area ( $\mu\text{m}^2$ ) of inclusions from cells in lung section;.  $P = 3.378e-8$   
665 by Kruskal Wallis Bonferroni treatment.

666 (C) Mice were pre-treated intraperitoneally with 8.3 nmoles/g mice Ncz or PBS for 1 h before  
667 being intranasally infected with 1000 plaque forming units (PFU) of X31 virus, injected with a daily  
668 dose of Ncz or PBS for 11 days and the weight loss monitored daily.

669

670 **Figure 7. Only hardened inclusions emerge in nucleozin-treated Rab11a-DN cell line.**

671 (A - B) A549 cells constitutively expressing GFP-Rab11a-WT and GFP-Rab11a-DN were infected  
672 for 10 h with PR8 at a MOI of 3 and treated with 5 $\mu\text{M}$  Ncz or DMSO before fixing for analysis by  
673 immunofluorescence. (A) Representative images of cells analysed by immunofluorescence  
674 staining using antibodies against viral protein NP (magenta), host Rab11 (green) and ER (cyan).

675 Nuclei and cell periphery delimited by yellow and white dashed line respectively, and white boxes  
676 are insets showing presence or absence of viral inclusions. Scale bar = 10  $\mu$ m.

677 (B) Scatter plot of circularity versus roundness of viral inclusions.

678 (C - E) A549 cells constitutively expressing GFP-Rab11a-DN were transfected with mcherry-NP  
679 and co-infected with PR8 virus at a MOI of 3. At 12hpi, the cells were treated with 5 $\mu$ M Ncz or  
680 DMSO for 10 mins before imaging.

681 (C) Schematic depicting the possible outcomes when Rab11a-DN cell lines are treated with Ncz.

682 (D) Time lapse pseudocolor images show fusion of IAV inclusions in a coarsening assay of PR8  
683 infected Rab11a-DN cell line treated with Ncz or DMSO (extracted from Supplementary Videos  
684 9,10).

685 (E) Plot depicting the aspect ratio of fusing inclusions over time in infected Rab11a-DN cell line  
686 treated with Ncz.

687

### 688 **Figure 8. Hardening of IAV inclusions changes its proteome solubility.**

689 (A - E) A549 cells constitutively expressing GFP-Rab11a-WT or GFP-Rab11a-DN were infected  
690 for 12 h with PR8 at a MOI of 5 and treated with 5 $\mu$ M Ncz or DMSO for 1 h. Thereafter, cells were  
691 lysed in mild (NP40) or strong detergent (SDS), while NP40 lysate was ultracentrifuged (100,000  
692 g) to pellet materials in condensates from the soluble fraction in the supernatant. Soluble and total  
693 host and viral proteome were identified by LC-MS/MS and solubility was determined as the ratio  
694 of soluble NP40- to SDS- derived total proteome abundances at the indicated time points.

695 (A) Schematic representation of solubility proteome profiling (SPP).

696 (B) Volcano plot representing relative host protein abundance in Rab11a-WT and Rab11a-DN  
697 infected cell lines (at 12 hpi) after treatment with Ncz or DMSO. Differentially upregulated proteins  
698 in these conditions (statistical significance – see *methods*) are indicated in blue dots

699 (C) Bar graphic comparing abundances of viral proteins (in log<sub>2</sub> scale) in Rab11a-WT and  
700 Rab11a-DN cell lines PR8-infected (12 hpi) and treated with either Ncz or DMSO.

701 (D) Volcano plot representing relative solubility of host and viral proteins in Rab11a-WT and  
702 Rab11a-DN infected cell lines (at 12 hpi) after treatment with Ncz. Differentially soluble proteins  
703 in these conditions (statistical significance – see *methods*) are indicated in pink and green dots.

704 (E) Bar graph comparing solubility (in log<sub>2</sub> scale) of viral proteins when PR8 infected (12 hpi)  
705 Rab11a-WT and Rab11a-DN cell lines were treated with either Ncz or DMSO.

706

### 707 **STAR METHODS**

708 Detailed methods are provided in the online version of this paper and include the following:

- 709 • **KEY RESOURCES TABLE**
- 710 • **RESOURCES AVAILABILITY**
  - 711 ○ Lead contact
  - 712 ○ Materials availability
  - 713 ○ Data and code availability
- 714 • **EXPERIMENTAL MODEL AND SUBJECT DETAILS**
  - 715 ○ Cell lines
  - 716 ○ Viruses
  - 717 ○ Animals and infection
  - 718 ○ Ethics statement
- 719 • **METHODS DETAILS**
  - 720 ○ Mice infection
  - 721 ○ Plaque assay.
  - 722 ○ Drug treatment
  - 723 ○ Microscopy and image processing
  - 724 ○ Determining inclusion topology and thermodynamics
  - 725 ○ Live Imaging, photoactivation
  - 726 ○ Particle tracking and coarsening assay
  - 727 ○ Solubility Proteome Profiling
    - 728 ▪ Mass spectrometry sample preparation
    - 729 ▪ Protein digestion and labelling
    - 730 ▪ LC-MS-MS measurement
    - 731 ▪ Protein identification and quantification
    - 732 ▪ Mass spectrometry data analysis and normalization.
    - 733 ▪ Differential analysis of protein abundance
    - 734 ▪ Differential analysis of protein solubility
    - 735 ▪ Gene ontology over representation analysis
- 736 • **QUANTIFICATION AND STATISTICAL ANALYSIS**
- 737
- 738
- 739 **KEY RESOURCES TABLE**



| Reagent or RESOURCE                                                   | SOURCE               | IDENTIFIER      |
|-----------------------------------------------------------------------|----------------------|-----------------|
| <b>Antibodies</b>                                                     |                      |                 |
| Anti-Rab11a                                                           | Proteintech          | Cat#15903-1-AP  |
| Anti-Calnexin                                                         | Abcam                | Cat#22595       |
| Anti-NP                                                               | Abcam                | Cat#20343       |
| <b>Chemical, peptides and recombinant proteins</b>                    |                      |                 |
| DMEM, high glucose, pyruvate, no glutamine (Gibco™)                   | ThermoFisher         | Cat#21969035    |
| L-Glutamine                                                           | ThermoFisher         | Cat#25030024    |
| OPTIMEM-I W/GLUTAMAX-I (CE)                                           | ThermoFisher         | Cat#51985026    |
| Leibovitz's L-15 Medium, no phenol red (Gibco®)                       | Life Technologies    | Cat#21083-027   |
| Lipofectamine™ LTX Reagent with PLUS™ Reagent (Invitrogen™)           | ThermoFisher         | Cat#15338100    |
| Penicillin-Streptomycin Solution                                      | Biowest              | Cat#L0022-100   |
| Dimethyl sulfoxide (DMSO)                                             | BioLabs              | Cat#B0515A      |
| Formaldehyde, extra pure, solution 37-41%, AR grade (Fisher Chemical) | Acros                | Cat#10231622    |
| Fetal Bovine Serum, qualified, heat inactivated, Brazil (Gibco™)      | ThermoFisher         | Cat#10500064    |
| Nucleozin                                                             | Target Mol           | Cat#282T7330    |
| 1,6-Hexanediol                                                        | Aldrich              | Cat#240117-50G  |
| Triton-X-100                                                          | Sigma                | Cat#X100        |
| Dako Faramount Aqueous Mounting Medium                                | Agilent Technologies | Cat#S3025       |
| Complete protease inhibitor cocktail                                  | Merck                | Cat#11836170001 |
| PhosphoStop                                                           | Merck                | Cat#4906837001  |

|                                        |                                                                                                       |                                                                                                                                                                 |
|----------------------------------------|-------------------------------------------------------------------------------------------------------|-----------------------------------------------------------------------------------------------------------------------------------------------------------------|
| RNasin® Plus RNase Inhibitor           | Promega                                                                                               | Cat#N2615                                                                                                                                                       |
| NP-40                                  | ThermoFisher Scientific                                                                               | Cat#FNN0021                                                                                                                                                     |
| SDS                                    | NZYTEch                                                                                               | Cat#MB01501                                                                                                                                                     |
| Benzonase® Nuclease HC                 | Merck                                                                                                 | Cat#71206-3                                                                                                                                                     |
| Ethanol                                | VWR chemicals                                                                                         | Cat#20821.330                                                                                                                                                   |
| Sequencing Grade Modified Trypsin      | Promega                                                                                               | Cat#V5111                                                                                                                                                       |
| Lysyl Endopeptidase, Mass Spectrometry | Wako                                                                                                  | Cat#125-05061                                                                                                                                                   |
| HEPES                                  | Alfa Aesar                                                                                            | Cat#A14777                                                                                                                                                      |
| TMT-16plex reagents                    | Thermo                                                                                                | Cat#A44522                                                                                                                                                      |
| PIERCE BCA protein assay               | Thermo                                                                                                | Cat#23225                                                                                                                                                       |
| <b>Deposited data</b>                  |                                                                                                       |                                                                                                                                                                 |
| Raw proteomics data                    | ProteomeXchange Consortium                                                                            | PRIDE: PXD034778                                                                                                                                                |
| Raw and analyzed data                  | This paper; Zenodo                                                                                    | 10.5281/zenodo.7292888                                                                                                                                          |
| <b>Recombinant DNA</b>                 |                                                                                                       |                                                                                                                                                                 |
| GFP-NP                                 | This paper                                                                                            | N/A                                                                                                                                                             |
| mcherry-NP                             | This paper                                                                                            | N/A                                                                                                                                                             |
| photoactivatable cherry-NP             | This paper                                                                                            | N/A                                                                                                                                                             |
| photoactivatable GFP-NP                | This paper                                                                                            | N/A                                                                                                                                                             |
| <b>Software and algorithms</b>         |                                                                                                       |                                                                                                                                                                 |
| FIJI                                   | This paper                                                                                            | <a href="https://imagej.net/software/fiji/">https://imagej.net/software/fiji/</a>                                                                               |
| R                                      | This paper                                                                                            | <a href="https://www.r-project.org/">https://www.r-project.org/</a>                                                                                             |
| Trackmate plugin                       | (Ershov et al., 2022; Tinevez et al., 2017)                                                           | <a href="https://imagej.net/plugins/trackmate/">https://imagej.net/plugins/trackmate/</a>                                                                       |
| <i>limma</i>                           | (Ritchie et al., 2015).                                                                               | <a href="https://bioconductor.org/packages/release/bioc/html/limma.html">https://bioconductor.org/packages/release/bioc/html/limma.html</a>                     |
| ClusterProfiler Bioconductor)          | (R) (Yu et al., 2012).                                                                                | <a href="https://bioconductor.org/packages/release/bioc/html/clusterProfiler.html">https://bioconductor.org/packages/release/bioc/html/clusterProfiler.html</a> |
| isobarQuant                            | <a href="https://doi.org/doi:10.18129/B9.bioc.isobar">https://doi.org/doi:10.18129/B9.bioc.isobar</a> | <a href="https://www.bioconductor.org/packages/release/bioc/html/isobar.html">https://www.bioconductor.org/packages/release/bioc/html/isobar.html</a>           |

|                    |                |                                                                                                          |                                                                                                                    |
|--------------------|----------------|----------------------------------------------------------------------------------------------------------|--------------------------------------------------------------------------------------------------------------------|
| Mascot<br>Science) | 2.4<br>(Matrix | <a href="https://doi.org/10.1016/j.cell.2018.02.030">https://doi.org/10.1016/j<br/>.cell.2018.02.030</a> | <a href="https://www.matrixscience.com/help/apr2012.html">https://www.matrixscience.com/help/a<br/>pr2012.html</a> |
|--------------------|----------------|----------------------------------------------------------------------------------------------------------|--------------------------------------------------------------------------------------------------------------------|

740

## 741 **RESOURCES AVAILABILITY**

### 742 **Lead contact**

743 Further information and requests for resources and reagents should be directed to and will be  
744 fulfilled by the lead contact, Maria Joao Amorim ([mjamorim@igc.gulbenkian.pt](mailto:mjamorim@igc.gulbenkian.pt)).

### 745 **Materials availability**

746 This study did not generate new unique reagent.

### 747 **Data availability and code availability**

748 • The mass spectrometry proteomics data have been deposited to the ProteomeXchange  
749 Consortium via the PRIDE (PubMed ID: 34723319) partner repository with the dataset  
750 identifier PXD034778.

- 751 ○ Reviewer account details:
- 752 ○ Username: [reviewer\\_pxd034778@ebi.ac.uk](mailto:reviewer_pxd034778@ebi.ac.uk)
- 753 ○ Password: BprURfLw

754 • All computer code or algorithm used to generate the results reported in the paper are  
755 available at [10.5281/zenodo.7292888](https://zenodo.org/record/7292888).

756 • All experimental data shown in Figure 1–8 and Figure S1-2 is available from the  
757 corresponding author upon request. Sequences of described viruses are accessible from  
758 the NCBI virus under accession number GCF\_000865725.1. Source data are provided  
759 with this paper in [10.5281/zenodo.7292888](https://zenodo.org/record/7292888).

760

761

## 762 **EXPERIMENTAL MODEL AND SUBJECT DETAILS**

### 763 **Cell lines**

764 GFP-Rab11a-WT and GFP-Rab11a-DN cell lines were produced in-house and characterized in  
765 (Vale-Costa et al., 2016), while the human alveolar basal cell (A549) and epithelial cell Madin-

766 Darby Canine Kidney (MDCK) were generous gifts from Prof Paul Digard, Roslin Institute, UK.  
767 Cells were cultured in Dulbecco's Modified Eagle's Medium (DMEM) supplemented with 10%  
768 fetal bovine serum (FBS), 2 mM L-glutamine and 1% Pencillin-Streptomycin. GFP-Rab11a cell  
769 lines were cultured/maintained in DMEM supplemented with 1.25 µg/mL Puromycin. Cells were  
770 maintained in a humidified incubator at 37°C and 5% v/v atmospheric CO<sub>2</sub>.

771

## 772 **Viruses**

773 Reverse-genetics engineered A/Puerto Rico/8/34 virus (PR8 WT; H1N1) was used to infect all  
774 cell types and titrated by plaque assay in MDCK cells, while X31 virus (a reassortant virus carrying  
775 HA and NA segments from A/Hong-Kong/1/1968 (H3N2) in the background of PR8) was used to  
776 infect mice. Infection for live imaging were done at 10 MOI, with viral infections for  
777 immunofluorescence at an MOI of 3 or 5.

778

## 779 **Animals and infection**

780 Female C57Bl/6 mice were used.

781

## 782 **Ethics statement**

783 All experiments involving mice were performed using 8-week-old littermate C57BL6/6J, female  
784 mice under specific pathogen-free conditions at the Instituto Gulbenkian de Ciência (IGC)  
785 biosafety level 2 animal facility (BSL-2). Animals were group housed in individually ventilated  
786 cages with access to food and water *ad libitum*. This research project was ethically reviewed and  
787 approved by both the Ethics Committee and the Animal Welfare Body of the IGC (license  
788 reference: A003.2021), and by the Portuguese National Entity that regulates the use of laboratory  
789 animals (DGAV – Direção Geral de Alimentação e Veterinária (license references:  
790 0421/000/000/2022, Controlling influenza A virus liquid organelles – LOFLU, funded by the  
791 European Research Council). All experiments conducted on animals followed the Portuguese  
792 (Decreto-Lei nº 113/2013) and European (Directive 2010/63/EU) legislations, concerning housing,  
793 husbandry, and animal welfare.

794

## 795 **METHODS DETAILS**

796

### 797 **Mice infection**

798 Female C57Bl/6 mice were infected with 4000pfu of X31 (A/X31; H3N2) virus for 2 days. At 30min,  
799 1h or 2h before the collection of the lungs, each mouse was intranasally treated with PBS (vehicle)  
800 or 2.3mg/mL of nucleozin (Ncz). Then, lungs were collected to determine viral titres by plaque  
801 assays (using MDCK infected with a set of serial dilutions from the homogenized lung tissue  
802 samples) and for histology processing.

803

#### 804 **Plaque assay.**

805 For viral titre measurement, A549 cells were seeded for 24 hrs, infected at MOI of 3 in DMEM  
806 supplemented with 2 mM L-glutamine and 1% penicillin/streptomycin and devoid of sera for 45  
807 mins at 37 °C and 5% CO<sub>2</sub>. The supernatants were subjected to a plaque assay in MDCK cells  
808 to calculate the virus titres, as described previously (Matrosovich et al., 2006).

809

#### 810 **Drug treatment**

811 Nucleozin was dissolved in dimethyl sulfoxide (DMSO) and used at a final concentration of 2 µM  
812 (immunofluorescence staining and virus titres) or 5 µM (live imaging), while 1,6-Hexanediol was  
813 dissolved in DMEM and used at 5 % (w/v).

814

#### 815 **Microscopy and image processing**

816 For immunofluorescence, A549 cells were fixed in 4% paraformaldehyde for 10 mins and  
817 permeabilized with triton-X-100 (0.2% (v/v)), incubated in primary antibodies for 1 h at RT, washed  
818 (3x) in PBS/1% FBS and finally incubated in Hoechst and Alexa Fluor conjugated secondary  
819 antibodies for 45mins at RT. Antibodies used were rabbit polyclonal against Rab11a (1:100;  
820 Proteintech, 15903-1-AP), calnexin (1:1000, Abcam, 22595), TRIM25 (1: 100, Abcam,  
821 ab167154), and NP (1:1000; gift from Prof Paul Digard), mouse polyclonal against NS1 (Neat, in-  
822 house from hybridoma made at the IGC antibody facility), mouse monoclonal against NP (1:1000;  
823 Abcam, 20343), Tom20 (1:200; Sigma-Aldrich, WH0009804M1) and Drp1 (1:200; Abcam,  
824 ab56788). Secondary antibodies were all from the Alexa Fluor range (1:1000; Life Technologies).  
825 Following washing in PBS, cells were mounted with Dako Faramount Aqueous Mounting Medium  
826 and single optical sections were imaged with a Leica SP5 live or stellaris confocal microscope  
827 using the photon counter mode. For z-stacks image, a spinning disk 3i (Marianas) confocal  
828 microscope was used in the super-resolution (CSU-W1, SoRa) mode. Samples were imaged on  
829 a 63x oil immersion Nikon objective (NA = 1.4). Using the function sum of slices, stacked images  
830 were projected to 2D and inclusion and its cytoplasmic milieu were segmented and analyzed  
831 using Lab-custom ImageJ macros and R analytics scripts.

832

### 833 **Determining inclusion topology and thermodynamics**

834 To determine the total concentration of vRNPs (NP as proxy) transported to the cytoplasm in  
835 relation to vRNPs produced in the nucleus ( $\frac{C_{cytoplasm}}{C_{nucleus}}$ ), a sum of slices of z-stacked images were  
836 used, otherwise, single plane images were analysed for other parameters. We used a custom (Fiji  
837 Is Just) ImageJ 2.1.0/1.53p script for image processing using the following pipeline: **(1.)** Segment  
838 cell periphery. **(2.)** Segment and remove nucleus from the cell to make the cytoplasm. **(3.)** From  
839 the cytoplasm, segment inclusions **(4.)** Analyse the cytoplasm, nucleus, and inclusions for number  
840 and topological shape descriptors **(5.)** Using the appropriate segmented region, measure the  
841 mean fluorescence intensity (as proxy of concentration) of cell, nucleus, cytoplasm, and  
842 cytoplasmic inclusion (See **Figure 1B**).

843 Using the method published by Riback *et al.* 2020 as template, we determined  $C_{dense}$  as the mean  
844 fluorescence intensity of the segmented inclusion while  $C_{dilute}$  was extrapolated from remaining  
845 cytoplasmic vRNP intensity outside the inclusions. We picked the best approach out of three to  
846 measure  $C_{dilute}$ . **(1.)** Use ROIs from randomly selected cytoplasmic areas lacking inclusions. The  
847 limitation with this method is that inclusions are highly abundant in the cytoplasm of infected cells  
848 and are nearly impossible to manually or automatically draw without selecting regions containing  
849 inclusions. **(2.)** Use an enlarged ROI band around the inclusions. This was easy to automate but  
850 limited by the overlap with other ROI bands due to the density of IAV inclusions in the infected  
851 cell. **(3.)** Use ROI of the entire cytoplasm devoid of viral inclusions. This was easy to automate,  
852 lacks overlap with other ROIs and serves as the cleanest strategy when compared to strategy 2  
853 (**Figure S3 A-H**). We used strategy 3 to determine the  $C_{dilute}$ .

854 Partition coefficient (K) and free energy ( $\Delta G$ ) were derived based on Riback *et al.*, 2020  
855 publication; where  $K = \frac{C_{dense}}{C_{dilute}}$ , and  $\Delta G = -RT \ln K$ . Inclusion saturation concentration ( $C_{sat}$ ) is the  
856 threshold  $C_{dilute}$  where inclusion begins to appear (~ 6hpi) and is calculated as the minimum  $C_{dilute}$   
857 in cells with observable viral inclusions. The change in free energy was normalised to 3hpi (an  
858 infection stage with nuclear vRNP staining lacking cytoplasmic inclusions and was represented  
859 as  $\Delta \Delta G = \Delta G - \Delta G_{(3\text{ hpi})}$ .

860

### 861 **Live Imaging, photoactivation**

862 A549 cells were seeded in 8-well glass-bottomed dish (Ibidi) and grown overnight in OptiMEM  
863 (37°C, 5% CO<sub>2</sub>). Cells infected with PR8 at an MOI of 10 were transfected simultaneously with  
864 200ng/μl GFP-NP or cherry-NP plasmid. For photoactivation experiment, a corresponding

865 plasmid of either photoactivatable cherry-NP or photoactivatable GFP-NP was co-transfected with  
866 lipofectamine LTX. Cells were imaged using OptiMEM or Leibovitz medium with a 63x oil  
867 immersion Nikon objective (NA = 1.4) on Roper TIRF, AiryScan or spinning disk confocal (SoRa)  
868 microscopes equipped with temperature (37°C) and CO<sub>2</sub> (5%) regulated chamber and stage.  
869 Inclusions at a specified region of interest (ROI) was activated by blue light (405 nm laser) at  
870 100% intensity and imaged at 1 frame/ sec for 2 min using 488 nm and 568 nm lasers for GFP  
871 and cherry respectively. Photoactivation data were post-processed in FIJI (Image J) using a  
872 modified FLAPh algorithm and analysed with a lab-custom R script. Model was obtained using  
873 single exponential curve fitting.  $y = (1-a) + ae^{-kt}$ , a = mobile fraction, K = decay rate constant (per  
874 second, s<sup>-1</sup>), t = time (s).

875

### 876 **Particle tracking and coarsening assay**

877 Trackmate plugin ((Fiji Is Just) ImageJ 2.1.0/1.53p, FIJI) was used to track inclusions at a  
878 timescale of 1 s/frame in live imaging samples and XY trajectories were subsequently analysed  
879 in a custom R (version 4.1.0) script. Using (FIJI and R), coarsening assay was analysed from  
880 time-lapsed tracking of two inclusions, starting from the point they first touch to the point they  
881 relax into a rounded puncta with an aspect ratio (AR) of 1.

882

### 883 **Solubility Proteome Profiling**

884 A549, GFP-Rab11a-WT and GFP-Rab11a-DN cells were mock-infected or infected with PR8  
885 virus between 4 to 16hpi and treated with nucleozin or DMSO. Frozen cell pellets containing 1x10<sup>6</sup>  
886 cells were shipped to Proteomics Core Facility at EMBL, Heidelberg for further sample  
887 processing.

888 Samples for mass spectrometry analysis were prepared as described (Zhang et al., 2022). Briefly,  
889 1x10<sup>6</sup> cells were resuspended in 100 µl lysis buffer (0.8 % NP-40, 1x cOmplete protease inhibitor  
890 cocktail (Roche), 1x PhosphoStop (Roche), 1 U/ml RNAsin (Promega), 1.5 mM MgCl<sub>2</sub> in PBS  
891 (2.67 mM KCl, 1.5 mM KH<sub>2</sub>PO<sub>4</sub>, 137 mM NaCl, and 8.1 mM NaH<sub>2</sub>PO<sub>4</sub>, pH 7.4). The sample  
892 aliquot for total proteome was incubated directly with benzonase on ice, while the sample aliquot  
893 for the soluble proteome was spun down at 100,000 g at 4 °C for 20 min. The supernatant was  
894 incubated with benzonase. Both total and soluble aliquots were incubated for 10 min with final 1  
895 % SDS. Protein concentration was determined for the total proteome sample and aliquots equal  
896 to 5 µg protein were taken for sample preparation for MS analysis. Both soluble and total lysate  
897 of each sample was combined in a multiplexing MS experiment.

898

## 899 **Mass spectrometry sample preparation**

900 Sample preparation for mass spectrometric measurements were performed as described in  
901 (Mateus et al., 2020; Sridharan et al., 2019) .

902

## 903 **Protein digestion and labelling**

904 Protein digestion was performed using a modified SP3 protocol (Hughes et al., 2014; Hughes et  
905 al., 2019). 5 µg of proteins (per condition) were diluted to a final volume of 20 µl with 0.5% SDS  
906 and mixed with a bead slurry (Sera-Mag Speed beads, Thermo Fisher Scientific) in ethanol) and  
907 incubated on a shaker at room temperature for 15 min. The beads were washed four times with  
908 70% ethanol. Proteins on beads were overnight reduced (1.7mM TECP), alkylated (5mM  
909 chloroacetamide) and digested (0.2 µg trypsin, 0.2µg LysC) 100 mM HEPES, pH8. On the next  
910 day, peptides were eluted from the beads, dried under vacuum, reconstituted in 10 µl of water  
911 and labelled with TMT-16plex reagents for one hour at room temperature. The labelling reaction  
912 was quenched with 4 µl of 5% hydroxylamine and the conditions belonging to a single MS  
913 experiment were pooled together. The pooled sample was desalted with solid-phase extraction  
914 after acidification with 0.1 % formic acid. The samples were loaded on a Waters OASIS HLB  
915 µelution plate (30µm), washed twice with 0.05% formic acid and finally eluted in 100 µl of 80%  
916 acetonitrile containing 0.05% formic acid. The desalted peptides were dried under vacuum and  
917 reconstituted in 20 mM ammonium formate. The samples were fractionated using C18-based  
918 reversed-phase chromatography running at high pH. Mobile phases constituted of 20 mM  
919 Ammonium formate pH 10 (buffer A) and acetonitrile (buffer B). This system was run at 0.1 ml/min  
920 on the following gradient: 0% B for 0 – 2 min, linear increase 0 - 35% B in 2 – 60 min, 35 – 85%  
921 B in 60 – 62 min, maintain at 85% B until 68 min, linear decrease to 0% in 68 – 70 min and finally  
922 equilibrated the system at 0% B until 85 min. Fractions were collected between 2 – 70 min and  
923 every 12<sup>th</sup> fraction was pooled together and vacuum dried.

924

## 925 **LC-MS-MS measurement**

926 Samples were re-suspended in 0.05% formic acid, 4% ACN in LC-MS grade water and analyzed  
927 on Q Exactive Plus mass spectrometer (Thermo Fisher Scientific) connected to UltiMate 3000  
928 RSLC nano system (Thermo Fisher Scientific) equipped with a trapping cartridge (Precolumn;  
929 C18 PepMap 100, 5 µm, 300 µm i.d. × 5 mm, 100 Å) and an analytical column (Waters nanoEase  
930 HSS C18 T3, 75 µm × 25 cm, 1.8 µm, 100 Å) for chromatographic separation. Mobile phase  
931 constituted of 0.1% formic acid in LC-MS grade water (Buffer A) and 0.1% formic acid in LC-MS  
932 grade acetonitrile (Buffer B). The peptides were loaded on the trap column (30 µl/min of 0.05%



933 trifluoroacetic acid in LC-MS grade water for 3 min) and eluted using a gradient from 2 % to 30 %  
934 Buffer B over 103 min at 0.3  $\mu$ l/min (followed by an increase to 40 % B, and a final wash to 80 %  
935 B for 2 min before re-equilibration to initial conditions). The outlet of the LC- system was directly  
936 fed for MS analysis using a Nanospray-Flex ion source and a Pico-Tip Emitter 360  $\mu$ m OD  $\times$  20  
937  $\mu$ m ID; 10  $\mu$ m tip (New Objective). The mass spectrometer was operated in positive ion mode.  
938 The spray voltage and capillary temperature was set to 2.2 kV and 275°C respectively. Full-scan  
939 MS spectra with a mass range of 375–1,200 m/z were acquired in profile mode using a resolution  
940 of 70,000 (maximum fill time of 250 ms or a maximum of 3e6 ions (automatic gain control, AGC)).  
941 Fragmentation was triggered for the top 10 peaks with charge 2–4 on the MS scan (data-  
942 dependent acquisition) with a 30-s dynamic exclusion window (normalized collision energy was  
943 30), and MS/MS spectra were acquired in profile mode with a resolution of 35,000 (maximum fill  
944 time of 120 ms or an AGC target of 2e5 ions).

945

#### 946 **Protein identification and quantification**

947 The MS data was processed as described in (Sridharan et al., 2019). Briefly, the raw MS data  
948 was processed with isobarQuant (and identification of peptides and proteins was performed with  
949 Mascot 2.4 (Matrix Science) against a database containing *Homo sapiens* Uniprot FASTA  
950 ((proteome ID: UP000005640, downloaded on 14 May 2016) and Influenza A virus (strain  
951 A/Puerto Rico/8/1934 H1N1, proteome ID: UP000009255) along with known contaminants and  
952 the reverse protein sequences (search parameters: trypsin; missed cleavages 3; peptide  
953 tolerance 10 ppm; MS/MS tolerance 0.02 Da; fixed modifications included carbamidomethyl on  
954 cysteines and TMT16plex on lysine; variable modifications included acetylation of protein N-  
955 terminus, methionine oxidation and TMT16plex on peptide N-termini).

956

#### 957 **Mass spectrometry data analysis and normalization.**

958 All MS data analysis was performed using R studio (version 1.2.1335 and R version 3.6.1). Data  
959 normalization of NP40- and SDS- derived proteomes was performed with *vs*n (Huber et al., 2002).  
960 The overall signal sum intensities distributions from all TMT channels of all replicates were  
961 corrected for technical variations.

962

#### 963 **Differential analysis of protein abundance**

964 The  $\log_2$  transformed *vs*n normalized SDS-derived signal sum intensities of proteins from different  
965 samples were analysed for differential abundances using *limma* (Ritchie et al., 2015). Proteins

966 with  $|\log_2(\text{fold change})| > 0.5$  and adjusted p-value (Benjamini Hochberg)  $< 0.1$  were considered  
967 significantly changed.

968

### 969 **Differential analysis of protein solubility**

970 Solubility is defined as the ratio of NP40- and SDS- derived abundances of proteins. This ratio  
971 was computed for all proteins measured in a dataset. The  $\log_2$  transformed protein solubility was  
972 compared between different conditions (time points of infection or different cell line at 12 hours  
973 post infection) using *limma*. Proteins with  $|\log_2(\text{fold change})| > 0.5$  and adjusted p-value  
974 (Benjamini Hochberg)  $< 0.1$  were considered significantly changed.

975

### 976 **Gene ontology over representation analysis**

977 Differential abundant or soluble human proteins from infection time course or different cell line  
978 datasets were used for GO term “Biological processes” and/or “Cellular Compartments”  
979 overrepresentation analysis using clusterProfiler (R Bioconductor) (Yu et al., 2012). All identified  
980 proteins in each dataset served as the background. Standard settings were used for representing  
981 enriched GO terms (p-value cutoff: 0.05, Benjamini-Hochberg procedure for multiple testing  
982 adjustment and q-value cutoff of 0.2).

983

### 984 **QUANTIFICATION AND STATISTICAL ANALYSIS**

985 After testing for homogeneity of variance, homogenously distributed data were assessed by  
986 parametric test using One-way ANOVA, followed by Tukey multiple comparisons of means. In  
987 contrast, non-homogenous data were assessed by non-parametric test with statistical levels  
988 determined after Kruskal-Wallis Bonferroni treatment. Alphabets above each boxplot represents  
989 the statistical differences between groups. Same alphabets indicate lack of significant difference  
990 between groups while different alphabets infer a statistically significant difference at  $\alpha = 0.05$ .

991

992

993

994 **REFERENCES**

- 995 Alberti, S., Gladfelter, A., and Mittag, T. (2019). Considerations and Challenges in Studying Liquid-Liquid  
996 Phase Separation and Biomolecular Condensates. *Cell* *176*, 419-434.
- 997 Alberti, S., and Hyman, A.A. (2021). Biomolecular condensates at the nexus of cellular stress, protein  
998 aggregation disease and ageing. *Nat Rev Mol Cell Biol* *22*, 196-213.
- 999 Alenquer, M., Vale-Costa, S., Etibor, T.A., Ferreira, F., Sousa, A.L., and Amorim, M.J. (2019). Influenza A  
1000 virus ribonucleoproteins form liquid organelles at endoplasmic reticulum exit sites. *Nature*  
1001 *Communications* *10*, 1629.
- 1002 Amorim, M.J. (2019). A Comprehensive Review on the Interaction Between the Host GTPase Rab11 and  
1003 Influenza A Virus. *Frontiers in Cell and Developmental Biology* *6*.
- 1004 Amorim, M.J., Bruce, E.A., Read, E.K., Foeglein, A., Mahen, R., Stuart, A.D., and Digard, P. (2011). A Rab11-  
1005 and microtubule-dependent mechanism for cytoplasmic transport of influenza A virus viral RNA. *J Virol*  
1006 *85*, 4143-4156.
- 1007 Amorim, M.J., Kao, R.Y., and Digard, P. (2013). Nucleozin targets cytoplasmic trafficking of viral  
1008 ribonucleoprotein-Rab11 complexes in influenza A virus infection. *J Virol* *87*, 4694-4703.
- 1009 Avilov, S.V., Moisy, D., Naffakh, N., and Cusack, S. (2012). Influenza A virus progeny vRNP trafficking in live  
1010 infected cells studied with the virus-encoded fluorescently tagged PB2 protein. *Vaccine* *30*, 7411-7417.
- 1011 Banani, S.F., Rice, A.M., Peeples, W.B., Lin, Y., Jain, S., Parker, R., and Rosen, M.K. (2016). Compositional  
1012 Control of Phase-Separated Cellular Bodies. *Cell* *166*, 651-663.
- 1013 Bracha, D., Walls, M.T., and Brangwynne, C.P. (2019a). Probing and engineering liquid-phase organelles.  
1014 *Nat Biotechnol* *37*, 1435-1445.
- 1015 Bracha, D., Walls, M.T., Wei, M.T., Zhu, L., Kurian, M., Avalos, J.L., Toettcher, J.E., and Brangwynne, C.P.  
1016 (2018). Mapping Local and Global Liquid Phase Behavior in Living Cells Using Photo-Oligomerizable Seeds.  
1017 *Cell* *175*, 1467-1480 e1413.
- 1018 Bracha, D., Walls, M.T., Wei, M.T., Zhu, L., Kurian, M., Avalos, J.L., Toettcher, J.E., and Brangwynne, C.P.  
1019 (2019b). Mapping Local and Global Liquid Phase Behavior in Living Cells Using Photo-Oligomerizable  
1020 Seeds. *Cell* *176*, 407.
- 1021 Bruce, E.A., Digard, P., and Stuart, A.D. (2010). The Rab11 pathway is required for influenza A virus budding  
1022 and filament formation. *J Virol* *84*, 5848-5859.
- 1023 Cheng, H., Wan, J., Lin, M.I., Liu, Y., Lu, X., Liu, J., Xu, Y., Chen, J., Tu, Z., Cheng, Y.S., *et al.* (2012). Design,  
1024 synthesis, and in vitro biological evaluation of 1H-1,2,3-triazole-4-carboxamide derivatives as new anti-  
1025 influenza A agents targeting virus nucleoprotein. *J Med Chem* *55*, 2144-2153.
- 1026 Chou, Y.Y., Heaton, N.S., Gao, Q., Palese, P., Singer, R.H., and Lionnet, T. (2013). Colocalization of different  
1027 influenza viral RNA segments in the cytoplasm before viral budding as shown by single-molecule sensitivity  
1028 FISH analysis. *PLoS Pathog* *9*, e1003358.
- 1029 Cianci, C., Gerritz, S.W., Deminie, C., and Krystal, M. (2012). Influenza nucleoprotein: promising target for  
1030 antiviral chemotherapy. *Antivir Chem Chemother* *23*, 77-91.
- 1031 Cosentino, G., Marougka, K., Desquesnes, A., Welti, N., Sitterlin, D., Gault, E., and Rameix-Welti, M.A.  
1032 (2022). Respiratory syncytial virus ribonucleoproteins hijack microtubule Rab11 dependent transport for  
1033 intracellular trafficking. *PLoS Pathog* *18*, e1010619.
- 1034 de Castro Martin, I.F., Fournier, G., Sachse, M., Pizarro-Cerda, J., Risco, C., and Naffakh, N. (2017).  
1035 Influenza virus genome reaches the plasma membrane via a modified endoplasmic reticulum and Rab11-  
1036 dependent vesicles. *Nat Commun* *8*, 1396.
- 1037 Eisfeld, A.J., Kawakami, E., Watanabe, T., Neumann, G., and Kawakami, Y. (2011). RAB11A is essential for  
1038 transport of the influenza virus genome to the plasma membrane. *J Virol* *85*, 6117-6126.

- 1039 Einfeld, A.J., Neumann, G., and Kawaoka, Y. (2015). At the centre: influenza A virus ribonucleoproteins.  
1040 *Nat Rev Microbiol* *13*, 28-41.
- 1041 Ershov, D., Phan, M.S., Pylvainainen, J.W., Rigaud, S.U., Le Blanc, L., Charles-Orszag, A., Conway, J.R.W.,  
1042 Laine, R.F., Roy, N.H., Bonazzi, D., *et al.* (2022). TrackMate 7: integrating state-of-the-art segmentation  
1043 algorithms into tracking pipelines. *Nat Methods* *19*, 829-832.
- 1044 Etibor, T.A., Yamauchi, Y., and Amorim, M.J. (2021). Liquid Biomolecular Condensates and Viral Lifecycles:  
1045 Review and Perspectives. *Viruses* *13*.
- 1046 Falahati, H., and Haji-Akbari, A. (2019). Thermodynamically driven assemblies and liquid-liquid phase  
1047 separations in biology. *Soft Matter* *15*, 1135-1154.
- 1048 Gavazzi, C., Yver, M., Isel, C., Smyth, R.P., Rosa-Calatrava, M., Lina, B., Moules, V., and Marquet, R. (2013).  
1049 A functional sequence-specific interaction between influenza A virus genomic RNA segments. *Proc Natl*  
1050 *Acad Sci U S A* *110*, 16604-16609.
- 1051 Han, J., Ganti, K., Sali, V.K., Twigg, C., Zhang, Y., Manivasagam, S., Liang, C.Y., Vogel, O.A., Huang, I.,  
1052 Emmanuel, S.N., *et al.* (2021). Host factor Rab11a is critical for efficient assembly of influenza A virus  
1053 genomic segments. *PLoS Pathog* *17*, e1009517.
- 1054 Haralampiev, I., Prisner, S., Nitzan, M., Schade, M., Jolmes, F., Schreiber, M., Loidolt-Kruger, M., Jongen,  
1055 K., Chamiolo, J., Nilson, N., *et al.* (2020). Selective flexible packaging pathways of the segmented genome  
1056 of influenza A virus. *Nat Commun* *11*, 4355.
- 1057 Helmich, F., Lee, C.C., Nieuwenhuizen, M.M., Gielen, J.C., Christianen, P.C., Larsen, A., Fytas, G., Leclere,  
1058 P.E., Schenning, A.P., and Meijer, E.W. (2010). Dilution-induced self-assembly of porphyrin aggregates: a  
1059 consequence of coupled equilibria. *Angew Chem Int Ed Engl* *49*, 3939-3942.
- 1060 Hermans, T.M., Broeren, M.A., Gomopoulos, N., van der Schoot, P., van Genderen, M.H., Sommerdijk,  
1061 N.A., Fytas, G., and Meijer, E.W. (2009). Self-assembly of soft nanoparticles with tunable patchiness. *Nat*  
1062 *Nanotechnol* *4*, 721-726.
- 1063 Hernandez-Vega, A., Braun, M., Scharrel, L., Jahnel, M., Wegmann, S., Hyman, B.T., Alberti, S., Diez, S., and  
1064 Hyman, A.A. (2017). Local Nucleation of Microtubule Bundles through Tubulin Concentration into a  
1065 Condensed Tau Phase. *Cell Rep* *20*, 2304-2312.
- 1066 Hu, Y., Sneyd, H., Dekant, R., and Wang, J. (2017). Influenza A Virus Nucleoprotein: A Highly Conserved  
1067 Multi-Functional Viral Protein as a Hot Antiviral Drug Target. *Curr Top Med Chem* *17*, 2271-2285.
- 1068 Huber, W., von Heydebreck, A., Sultmann, H., Poustka, A., and Vingron, M. (2002). Variance stabilization  
1069 applied to microarray data calibration and to the quantification of differential expression. *Bioinformatics*  
1070 *18 Suppl 1*, S96-104.
- 1071 Hughes, C.S., Foehr, S., Garfield, D.A., Furlong, E.E., Steinmetz, L.M., and Krijgsveld, J. (2014).  
1072 Ultrasensitive proteome analysis using paramagnetic bead technology. *Mol Syst Biol* *10*, 757.
- 1073 Hughes, C.S., Moggridge, S., Muller, T., Sorensen, P.H., Morin, G.B., and Krijgsveld, J. (2019). Single-pot,  
1074 solid-phase-enhanced sample preparation for proteomics experiments. *Nat Protoc* *14*, 68-85.
- 1075 Hutchinson, E.C., von Kirchbach, J.C., Gog, J.R., and Digard, P. (2010). Genome packaging in influenza A  
1076 virus. *J Gen Virol* *91*, 313-328.
- 1077 Hyman, A.A., Weber, C.A., and Julicher, F. (2014). Liquid-liquid phase separation in biology. *Annu Rev Cell*  
1078 *Dev Biol* *30*, 39-58.
- 1079 Kao, R.Y., Yang, D., Lau, L.S., Tsui, W.H., Hu, L., Dai, J., Chan, M.P., Chan, C.M., Wang, P., Zheng, B.J., *et al.*  
1080 (2010). Identification of influenza A nucleoprotein as an antiviral target. *Nat Biotechnol* *28*, 600-605.
- 1081 Kawakami, E., Watanabe, T., Fujii, K., Goto, H., Watanabe, S., Noda, T., and Kawaoka, Y. (2011). Strand-  
1082 specific real-time RT-PCR for distinguishing influenza vRNA, cRNA, and mRNA. *J Virol Methods* *173*, 1-6.
- 1083 Klein, I.A., Boija, A., Afeyan, L.K., Hawken, S.W., Fan, M., Dall'Agnese, A., Oksuz, O., Henninger, J.E.,  
1084 Shrinivas, K., Sabari, B.R., *et al.* (2020). Partitioning of cancer therapeutics in nuclear condensates. *Science*  
1085 *368*, 1386-1392.

- 1086 Klosin, A., Oltsch, F., Harmon, T., Honigmann, A., Julicher, F., Hyman, A.A., and Zechner, C. (2020). Phase  
1087 separation provides a mechanism to reduce noise in cells. *Science* 367, 464-468.
- 1088 Kroschwald, S., Munder, M.C., Maharana, S., Franzmann, T.M., Richter, D., Ruer, M., Hyman, A.A., and  
1089 Alberti, S. (2018). Different Material States of Pub1 Condensates Define Distinct Modes of Stress  
1090 Adaptation and Recovery. *Cell Rep* 23, 3327-3339.
- 1091 Lakdawala, S.S., Wu, Y., Wawrzusin, P., Kabat, J., Broadbent, A.J., Lamirande, E.W., Fodor, E., Altan-  
1092 Bonnet, N., Shroff, H., and Subbarao, K. (2014). Influenza a virus assembly intermediates fuse in the  
1093 cytoplasm. *PLoS Pathog* 10, e1003971.
- 1094 Lampejo, T. (2020). Influenza and antiviral resistance: an overview. *Eur J Clin Microbiol Infect Dis* 39, 1201-  
1095 1208.
- 1096 Le Sage, V., Kanarek, J.P., Snyder, D.J., Cooper, V.S., Lakdawala, S.S., and Lee, N. (2020). Mapping of  
1097 Influenza Virus RNA-RNA Interactions Reveals a Flexible Network. *Cell Rep* 31, 107823.
- 1098 Lee, J.E., Cathey, P.I., Wu, H., Parker, R., and Voeltz, G.K. (2020). Endoplasmic reticulum contact sites  
1099 regulate the dynamics of membraneless organelles. *Science* 367.
- 1100 Lopez, N., Camporeale, G., Salgueiro, M., Borkosky, S.S., Visentin, A., Peralta-Martinez, R., Loureiro, M.E.,  
1101 and de Prat-Gay, G. (2021). Deconstructing virus condensation. *PLoS Pathog* 17, e1009926.
- 1102 Mateus, A., Hevler, J., Bobonis, J., Kurzawa, N., Shah, M., Mitosch, K., Goemans, C.V., Helm, D., Stein, F.,  
1103 Typas, A., *et al.* (2020). The functional proteome landscape of *Escherichia coli*. *Nature* 588, 473-478.
- 1104 Matrosovich, M., Matrosovich, T., Garten, W., and Klenk, H.D. (2006). New low-viscosity overlay medium  
1105 for viral plaque assays. *Virology* 3, 63.
- 1106 Milovanovic, D., and De Camilli, P. (2017). Synaptic Vesicle Clusters at Synapses: A Distinct Liquid Phase?  
1107 *Neuron* 93, 995-1002.
- 1108 Mittag, T., and Parker, R. (2018). Multiple Modes of Protein-Protein Interactions Promote RNP Granule  
1109 Assembly. *J Mol Biol* 430, 4636-4649.
- 1110 Momose, F., Sekimoto, T., Ohkura, T., Jo, S., Kawaguchi, A., Nagata, K., and Morikawa, Y. (2011). Apical  
1111 transport of influenza A virus ribonucleoprotein requires Rab11-positive recycling endosome. *PLoS One* 6,  
1112 e21123.
- 1113 Munder, M.C., Midtvedt, D., Franzmann, T., Nuske, E., Otto, O., Herbig, M., Ulbricht, E., Muller, P.,  
1114 Taubenberger, A., Maharana, S., *et al.* (2016). A pH-driven transition of the cytoplasm from a fluid- to a  
1115 solid-like state promotes entry into dormancy. *Elife* 5.
- 1116 Nakamura, H., Lee, A.A., Afshar, A.S., Watanabe, S., Rho, E., Razavi, S., Suarez, A., Lin, Y.C., Tanigawa, M.,  
1117 Huang, B., *et al.* (2018). Intracellular production of hydrogels and synthetic RNA granules by multivalent  
1118 molecular interactions. *Nat Mater* 17, 79-89.
- 1119 Nakano, M., Sugita, Y., Kodera, N., Miyamoto, S., Muramoto, Y., Wolf, M., and Noda, T. (2021).  
1120 Ultrastructure of influenza virus ribonucleoprotein complexes during viral RNA synthesis. *Commun Biol* 4,  
1121 858.
- 1122 Nakatsu, Y., Ma, X., Seki, F., Suzuki, T., Iwasaki, M., Yanagi, Y., Komase, K., and Takeda, M. (2013).  
1123 Intracellular transport of the measles virus ribonucleoprotein complex is mediated by Rab11A-positive  
1124 recycling endosomes and drives virus release from the apical membrane of polarized epithelial cells. *J*  
1125 *Virology* 87, 4683-4693.
- 1126 Nanbo, A., and Ohba, Y. (2018). Budding of Ebola Virus Particles Requires the Rab11-Dependent Endocytic  
1127 Recycling Pathway. *J Infect Dis* 218, S388-S396.
- 1128 Patel, A., Malinowska, L., Saha, S., Wang, J., Alberti, S., Krishnan, Y., and Hyman, A.A. (2017). ATP as a  
1129 biological hydrotrope. *Science* 356, 753-756.
- 1130 Perdikari, T.M., Murthy, A.C., Ryan, V.H., Watters, S., Naik, M.T., and Fawzi, N.L. (2020). SARS-CoV-2  
1131 nucleocapsid protein undergoes liquid-liquid phase separation stimulated by RNA and partitions into  
1132 phases of human ribonucleoproteins. *bioRxiv*.

- 1133 Pons, M.W. (1976). A reexamination of influenza single- and double-stranded RNAs by gel electrophoresis.  
1134 *Virology* *69*, 789-792.
- 1135 Quiroz, F.G., and Chilkoti, A. (2015). Sequence heuristics to encode phase behaviour in intrinsically  
1136 disordered protein polymers. *Nat Mater* *14*, 1164-1171.
- 1137 Rai, A.K., Chen, J.X., Selbach, M., and Pelkmans, L. (2018). Kinase-controlled phase transition of  
1138 membraneless organelles in mitosis. *Nature* *559*, 211-216.
- 1139 Riback, J.A., and Brangwynne, C.P. (2020). Can phase separation buffer cellular noise? *Science* *367*, 364-  
1140 365.
- 1141 Riback, J.A., Zhu, L., Ferrolino, M.C., Tolbert, M., Mitrea, D.M., Sanders, D.W., Wei, M.T., Kriwacki, R.W.,  
1142 and Brangwynne, C.P. (2020). Composition-dependent thermodynamics of intracellular phase separation.  
1143 *Nature* *581*, 209-214.
- 1144 Risso-Ballester, J., Galloux, M., Cao, J., Le Goffic, R., Hontonnou, F., Jobart-Malfait, A., Desquesnes, A.,  
1145 Sake, S.M., Haid, S., Du, M., *et al.* (2021). A condensate-hardening drug blocks RSV replication in vivo.  
1146 *Nature* *595*, 596-599.
- 1147 Ritchie, M.E., Phipson, B., Wu, D., Hu, Y., Law, C.W., Shi, W., and Smyth, G.K. (2015). limma powers  
1148 differential expression analyses for RNA-sequencing and microarray studies. *Nucleic Acids Res* *43*, e47.
- 1149 Sanders, D.W., Kedersha, N., Lee, D.S.W., Strom, A.R., Drake, V., Riback, J.A., Bracha, D., Eeftens, J.M.,  
1150 Iwanicki, A., Wang, A., *et al.* (2020). Competing Protein-RNA Interaction Networks Control Multiphase  
1151 Intracellular Organization. *Cell* *181*, 306-324 e328.
- 1152 Shafiuddin, M., and Boon, A.C.M. (2019). RNA Sequence Features Are at the Core of Influenza A Virus  
1153 Genome Packaging. *J Mol Biol*.
- 1154 Shimobayashi, S.F., Ronceray, P., Sanders, D.W., Haataja, M.P., and Brangwynne, C.P. (2021). Nucleation  
1155 landscape of biomolecular condensates. *Nature* *599*, 503-506.
- 1156 Shin, Y., Berry, J., Pannucci, N., Haataja, M.P., Toettcher, J.E., and Brangwynne, C.P. (2017). Spatiotemporal  
1157 Control of Intracellular Phase Transitions Using Light-Activated optoDroplets. *Cell* *168*, 159-171 e114.
- 1158 Snead, W.T., and Gladfelter, A.S. (2019). The Control Centers of Biomolecular Phase Separation: How  
1159 Membrane Surfaces, PTMs, and Active Processes Regulate Condensation. *Mol Cell* *76*, 295-305.
- 1160 Snead, W.T., Jaliha, A.P., Gerbich, T.M., Seim, I., Hu, Z., and Gladfelter, A.S. (2022). Membrane surfaces  
1161 regulate assembly of ribonucleoprotein condensates. *Nat Cell Biol*.
- 1162 Sridharan, S., Hernandez-Armendariz, A., Kurzawa, N., Potel, C.M., Memon, D., Beltrao, P., Bantscheff, M.,  
1163 Huber, W., Cuylen-Haering, S., and Savitski, M.M. (2022). Systematic discovery of biomolecular  
1164 condensate-specific protein phosphorylation. *Nat Chem Biol* *18*, 1104-1114.
- 1165 Sridharan, S., Kurzawa, N., Werner, T., Gunthner, I., Helm, D., Huber, W., Bantscheff, M., and Savitski,  
1166 M.M. (2019). Proteome-wide solubility and thermal stability profiling reveals distinct regulatory roles for  
1167 ATP. *Nat Commun* *10*, 1155.
- 1168 Sugita, Y., Sagara, H., Noda, T., and Kawaoka, Y. (2013). Configuration of viral ribonucleoprotein complexes  
1169 within the influenza A virion. *J Virol* *87*, 12879-12884.
- 1170 Tinevez, J.Y., Perry, N., Schindelin, J., Hoopes, G.M., Reynolds, G.D., Laplantine, E., Bednarek, S.Y., Shorte,  
1171 S.L., and Eliceiri, K.W. (2017). TrackMate: An open and extensible platform for single-particle tracking.  
1172 *Methods* *115*, 80-90.
- 1173 Vale-Costa, S., Alenquer, M., Sousa, A.L., Kellen, B., Ramalho, J., Tranfield, E.M., and Amorim, M.J. (2016).  
1174 Influenza A virus ribonucleoproteins modulate host recycling by competing with Rab11 effectors. *J Cell Sci*  
1175 *129*, 1697-1710.
- 1176 Vale-Costa, S., and Amorim, M.J. (2017). Clustering of Rab11 vesicles in influenza A virus infected cells  
1177 creates hotspots containing the 8 viral ribonucleoproteins. *Small GTPases* *8*, 71-77.
- 1178 Veler, H., Fan, H., Keown, J., Sharps, J., Fournier, M., Grimes, J.M., and Fodor, E. (2022). The C-terminal  
1179 domains of the PB2 subunit of the influenza A virus RNA polymerase directly interact with cellular GTPase  
1180 Rab11a. *J Virol*, jvi0197921.

1181 Weber, S.C., and Brangwynne, C.P. (2015). Inverse size scaling of the nucleolus by a concentration-  
1182 dependent phase transition. *Curr Biol* 25, 641-646.

1183 Yang, P., Mathieu, C., Kolaitis, R.M., Zhang, P., Messing, J., Yurtsever, U., Yang, Z., Wu, J., Li, Y., Pan, Q., *et*  
1184 *al.* (2020). G3BP1 Is a Tunable Switch that Triggers Phase Separation to Assemble Stress Granules. *Cell*  
1185 181, 325-345 e328.

1186 Yu, G., Wang, L.G., Han, Y., and He, Q.Y. (2012). clusterProfiler: an R package for comparing biological  
1187 themes among gene clusters. *OMICS* 16, 284-287.

1188 Zhang, X., Sridharan, S., Zagoriy, I., Oegema, C.E., Ching, C., Pflaesterer, T., Fung, H.K.H., Poser, I., Müller,  
1189 C.W., Hyman, A.A., *et al.* (2022). Molecular mechanisms of stress-induced reactivation in mumps virus  
1190 condensates. *bioRxiv*, 2021.2007.2010.451879.

1191 Zhu, L., Richardson, T.M., Wacheul, L., Wei, M.T., Feric, M., Whitney, G., Lafontaine, D.L.J., and  
1192 Brangwynne, C.P. (2019). Controlling the material properties and rRNA processing function of the  
1193 nucleolus using light. *Proc Natl Acad Sci U S A* 116, 17330-17335.

1194

1195

1196

1197

1198

1199

1200

1201

1202

1203

1204

1205

1206

1207

1208

1209

1210

1211

1212

1213 **Figures**

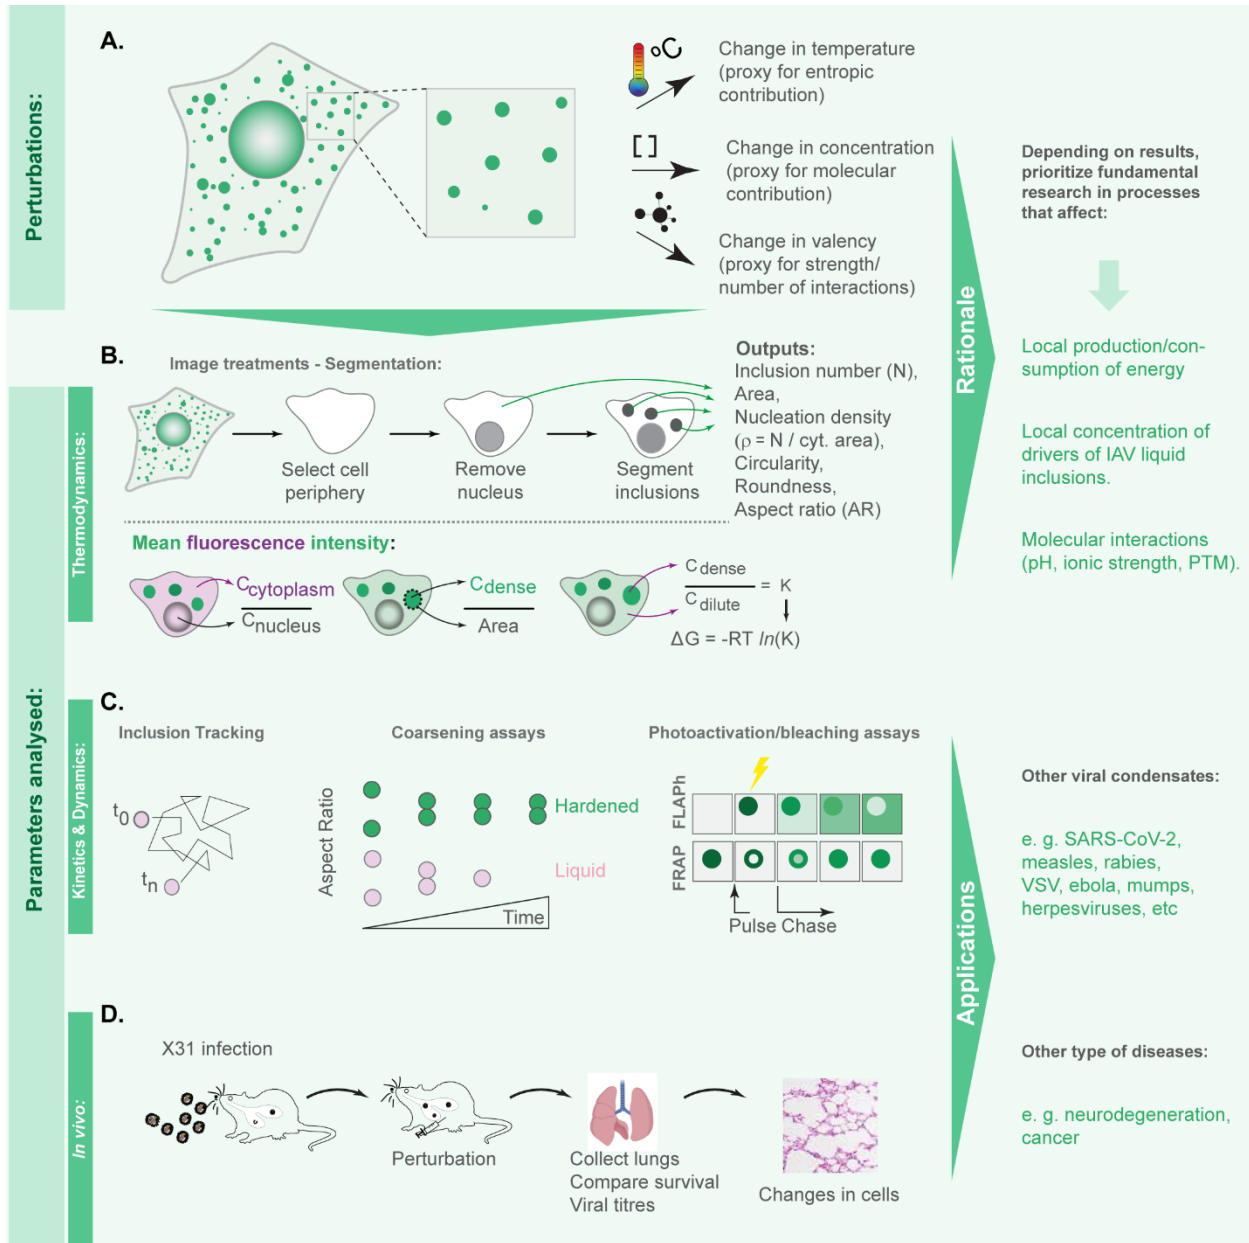

1214

1215 **Figure 1**

1216



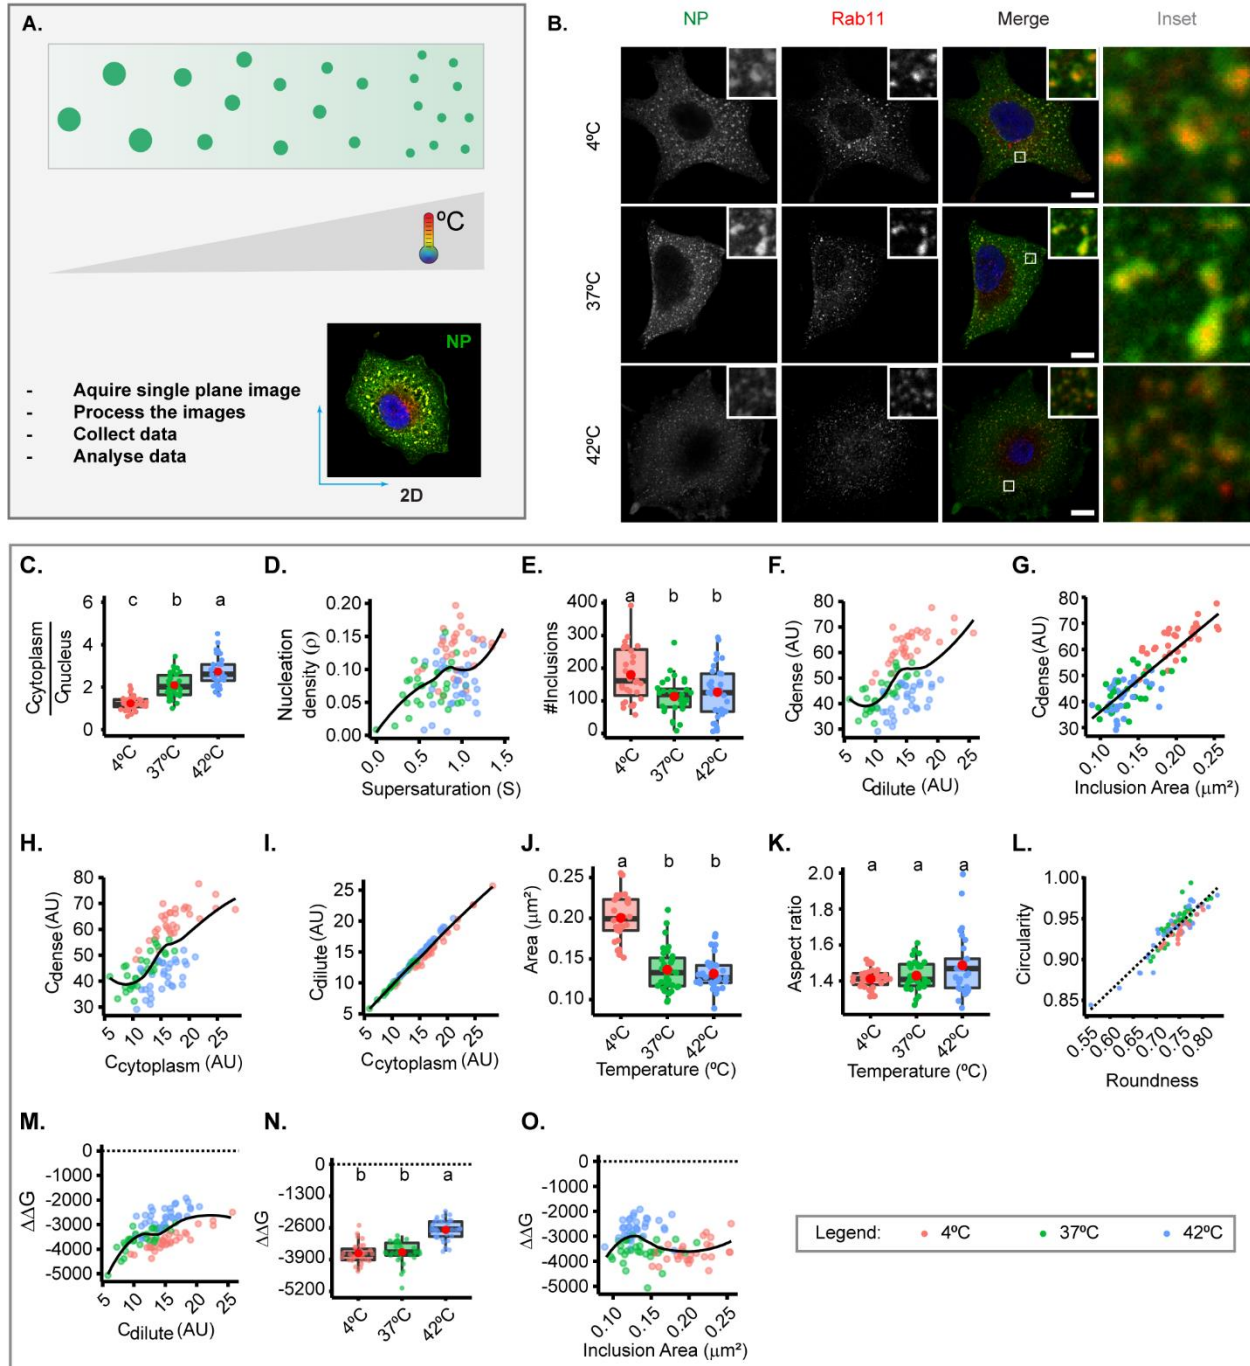

1217

1218 **Figure 2**

1219

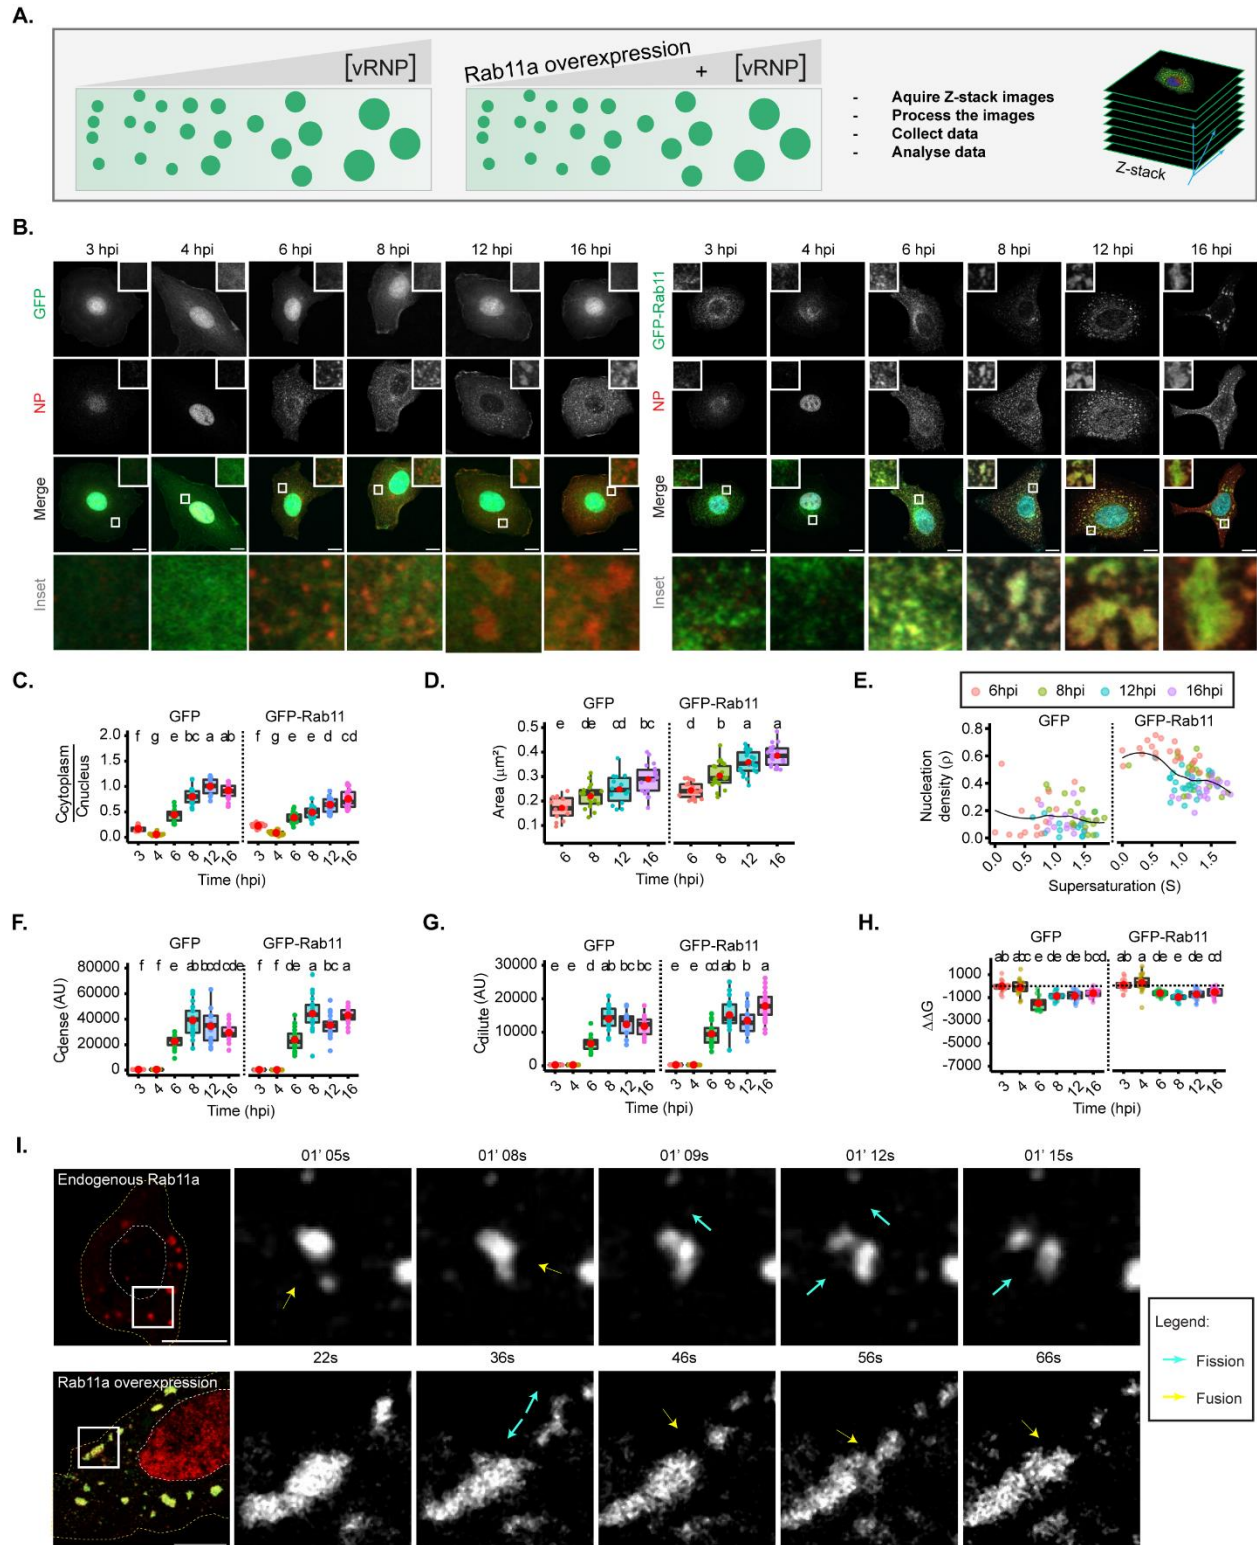

1220

1221 **Figure 3**

1222

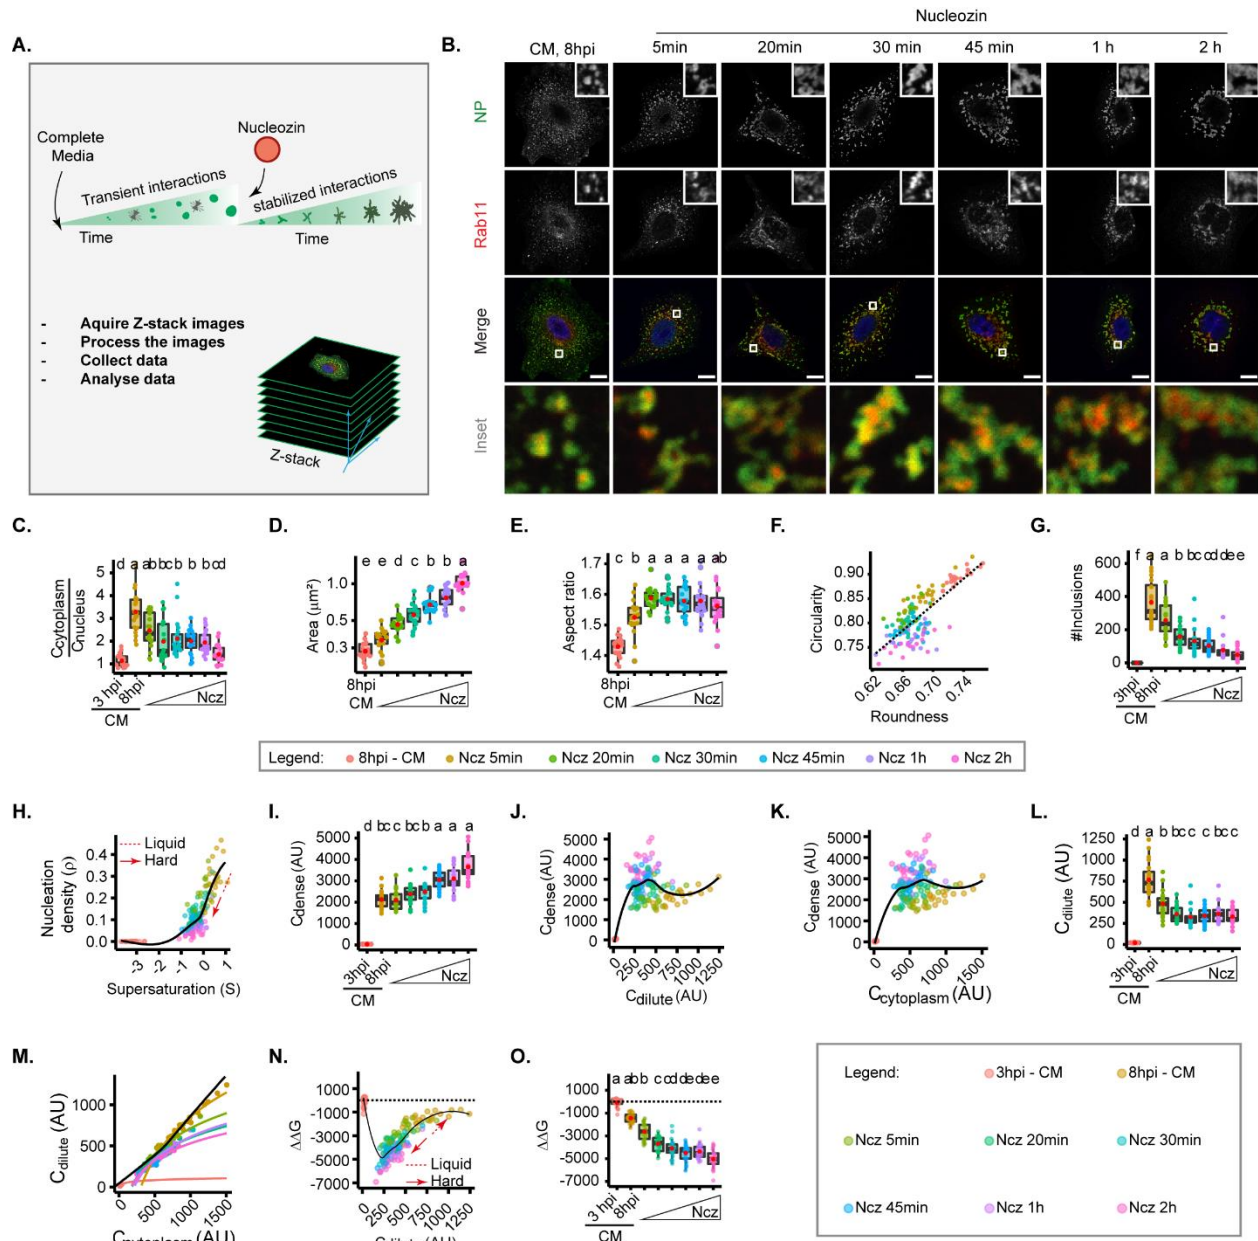

1223

1224 **Figure 4**

1225

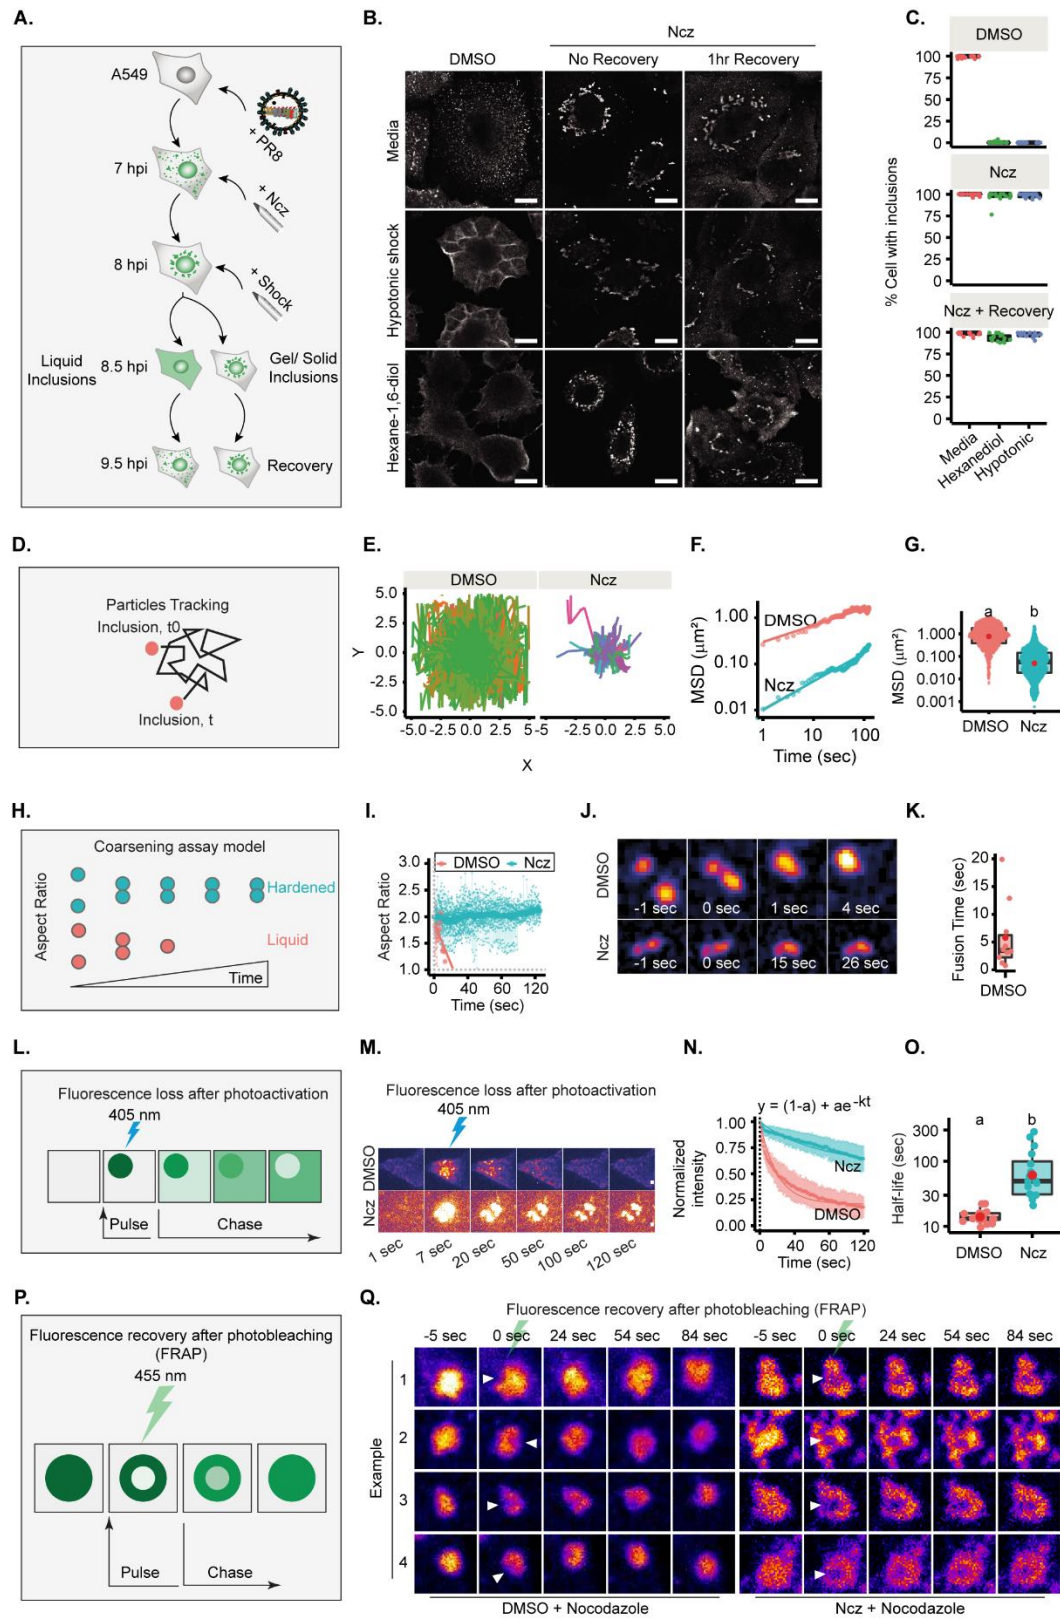

1226

1227 **Figure 5**

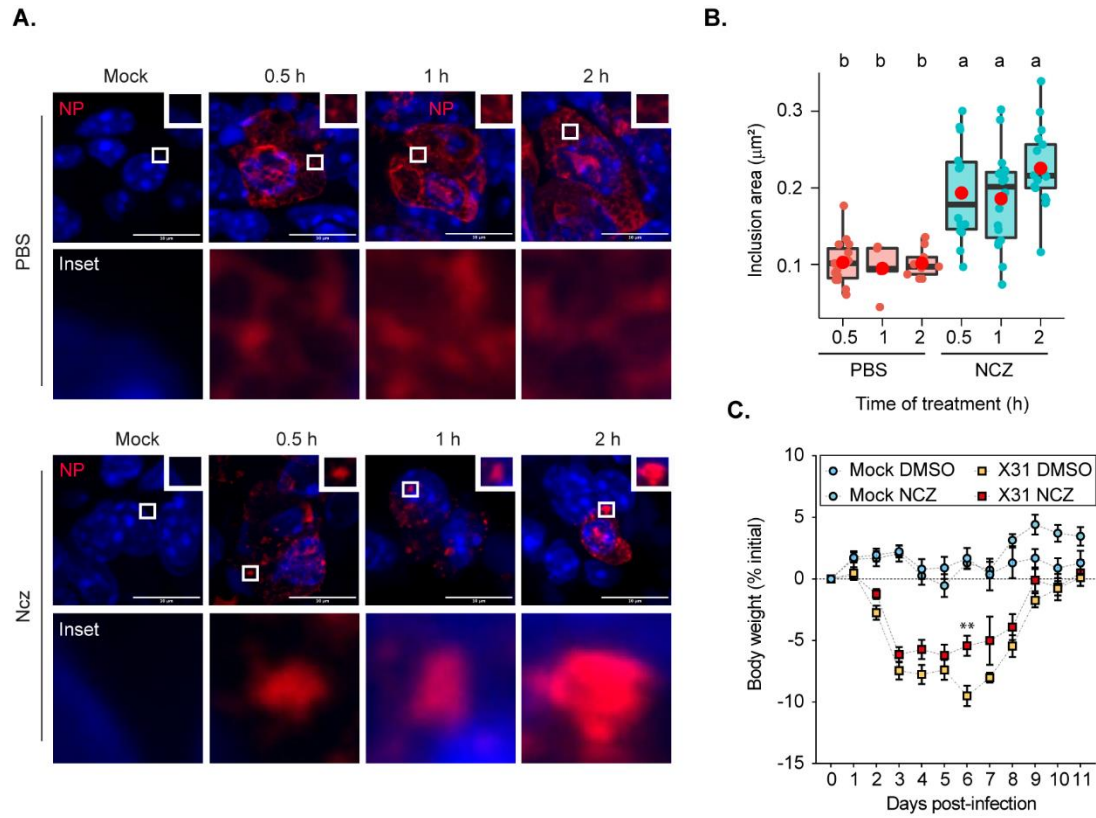

1228

1229 **Figure 6**

1230

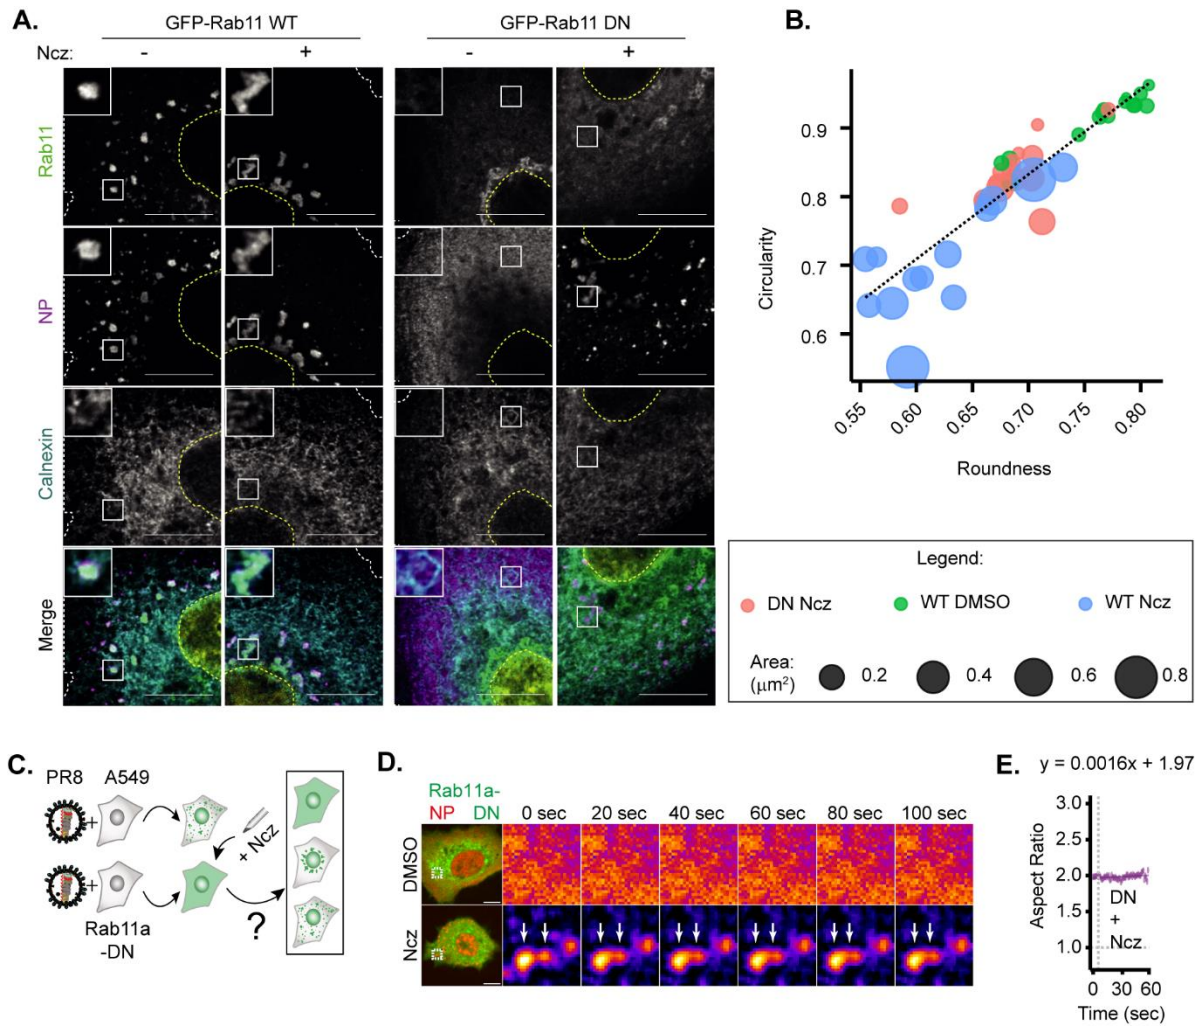

1231

1232 **Figure 7**

1233

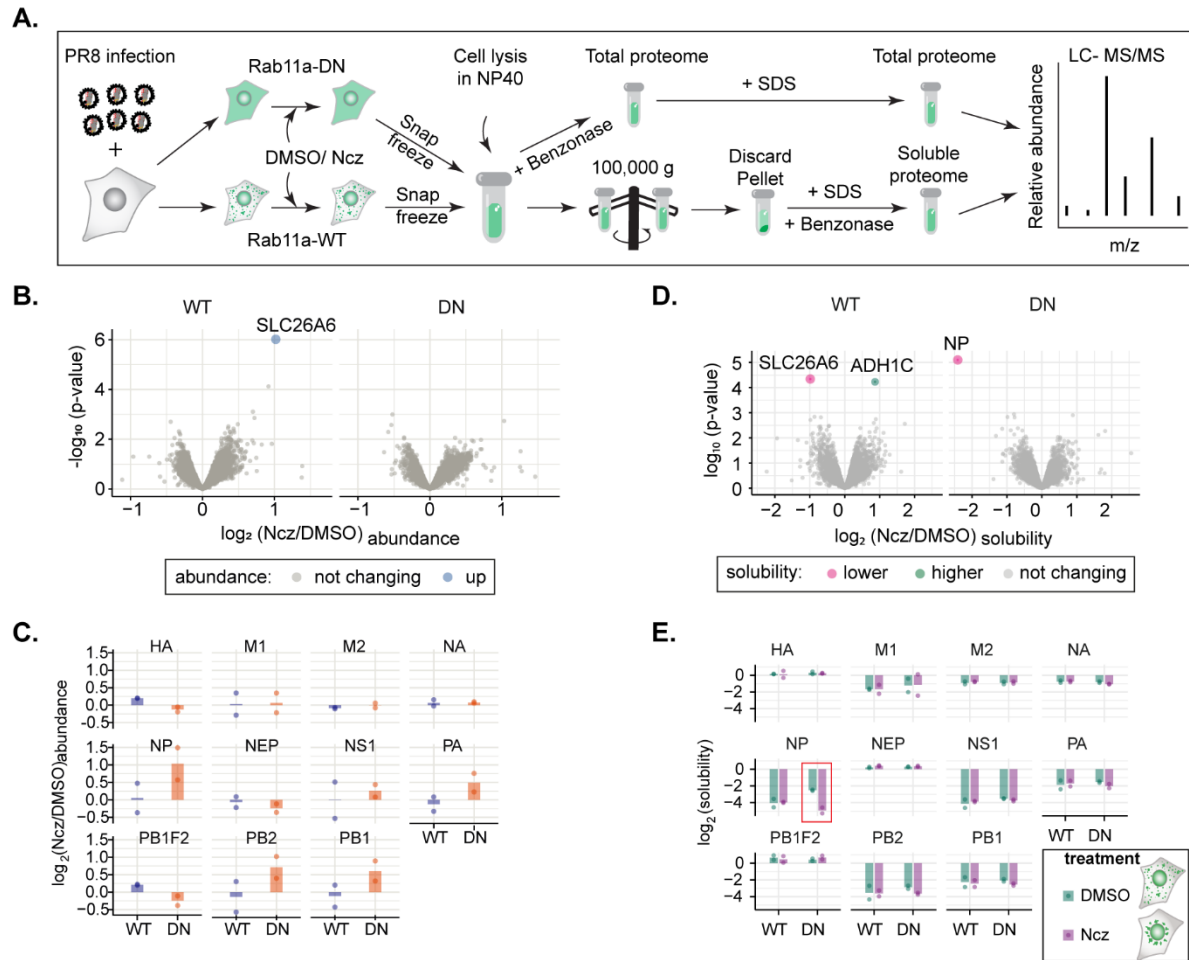

1234

1235 **Figure 8**

1236

1237 **SUPPLEMENTAL INFORMATION**

1238 This section contains extended material – Movie 1-10, Tables S1-3 and Figure S1-S3, - for the  
1239 manuscript “Rules for hardening influenza A virus liquid condensates” from the authors Temitope  
1240 Akhigbe Etibor, Sílvia Vale-Costa, Sindhuja Sridharan, Daniela Brás, Isabelle Becher, Victor  
1241 Mello, Filipe Ferreira, Marta Bebiano Alenquer, Mikhail Savitski and Maria João Amorim.  
1242



1243 **Supplementary Videos**

1244 All videos were acquired at the speed of 1second/frame.

1245

1246 **Movie S1:** Fusion and Fission dynamics of IAV inclusions with endogenous Rab11a.

1247 A549 cells expressing endogenous Rab11a were PR8 infected and co-transfected with cherry-  
1248 NP for 16 hrs and subsequently monitored for inclusion fusion and fission events by live  
1249 imaging.

1250

1251 **Movie S2:** Fusion and Fission dynamics of IAV inclusions overexpressing Rab11a.

1252 Cell lines overexpressing Rab11a-WT were PR8 infected and co-transfected with cherry-NP for  
1253 16 hrs, after which fusion and fusion dynamics were monitored by live imaging.

1254

1255 **Movie S3:** Coarsening assay in liquid inclusions

1256 Liquid-like DMSO-treated inclusions formed in post infected and GFP-NP co-transfected A549  
1257 cells were quantified for their ability to coarsen by live imaging. We present 2 videos a-b,  
1258 showing an entire cell (a) or an inlet with an example of fusion event (b).

1259

1260 **Movie S4:** Coarsening assay in hardened inclusions

1261 Hardened nucleozin-induced inclusions formed in post infected and GFP-NP co-transfected  
1262 A549 cells were quantified for their inability to coarsen by live imaging. We present 2 videos a-b,  
1263 showing an entire cell (a) or an inlet with an example of fusion event (b).

1264

1265 **Movie S5:** Fluorescence loss after photoactivation (FLAPh) in liquid inclusions.

1266 PR8 infected A549 was co-transfected with cherry-NP and photoGFP-NP and treated with  
1267 DMSO for posterior photoactivation of viral inclusions (with blue light, 405 nm) at a region of  
1268 interest (ROI). Fluorescence loss in the ROI was monitored over time as vRNPs (NP, as a  
1269 proxy) were transferred from the activated zone to the inactivated region. We present 3 videos  
1270 a-d, the separate channels for cherry-NP (a), photoGFP-NP (b), the merged video (c).

1271

1272 **Movie S6:** Fluorescence loss after photoactivation (FLAPh) in hardened inclusions.

1273 PR8 infected A549 was co-transfected with photoGFP-NP and cherry-NP and treated with  
1274 nucleozin for posterior photoactivation of viral inclusions (with blue light, 405 nm) at a region of  
1275 interest (ROI). Fluorescence loss in the ROI was monitored over time as vRNPs (NP, as a  
1276 proxy) were transferred from the activated zone to the inactivated region. We present 3 videos  
1277 a-c, the separate channels for cherry-NP (a), photoGFP-NP (b), the merged video (c).

1278

1279 **Movie S7:** Fluorescence recovery after photobleaching (FRAP) in liquid inclusions

1280 PR8 infected A549 co-transfected with GFP-NP and cherry-NP were treated with nocodazole  
1281 (Noc) and subsequently photobleached (488 nm) at a region of interest (ROI) in the centre of an  
1282 inclusion to follow the internal rearrangement by live imaging. We present 2 videos a-b, showing  
1283 an entire cell (a) or an inlet with an example of fusion event (b).

1284

1285 **Movie S8:** FRAP in hardened inclusions.

1286 PR8 infected A549 co-transfected with GFP-NP and cherry-NP were treated with both  
1287 nocodazole and nucleozin and subsequently photobleached (488 nm) at a region of interest  
1288 (ROI) in the centre of an inclusion to see if internal rearrangement occurred during live imaging.  
1289 We present 2 videos a-b, showing an entire cell (a) or an inlet with an example of fusion event  
1290 (b).

1291

1292 **Movie S9:** Coarsening assay of Rab11a-DN cells treated with DMSO but lacking inclusions.

1293 GFP-Rab11a-DN cell lines lacking viral inclusion and coarsening events upon infection and  
1294 transfection (cherry-NP). We present 4 videos a-d, the separate channels for cherry-NP (a),  
1295 photoGFP-NP (b), the merged video (c).

1296

1297 **Movie S10:** Coarsening assay of hardened viral inclusions formed by treating Rab11a-DN with  
1298 nucleozin.

1299 GFP-Rab11a-DN cell lines transfected (with cherry-NP) and PR8-infected display a solid-like  
1300 coarsening behaviour when treated with nucleozin. We present 4 videos a-d, the separate  
1301 channels for cherry-NP (a), photoGFP-NP (b), the merged video (c).

1302

1303

1304 **Supplementary Tables**

1305

1306 **Table S1:** Topology, thermodynamics and material properties of IAV inclusions.

1307 After PR8 infection (1 MOI) inclusions were subjected to thermal changes (Sheet 1) and live  
1308 imaging for inclusion tracking (Sheet 5), fusion dynamics (Sheet 6) and FLAPh (Sheet 7), or  
1309 observed for different hours post infection (hpi) as vRNP concentration increases (Sheet 2) or  
1310 with overexpressed Rab11 (Sheet 3), or nucleozin treatment (Sheet 4). The data summary of  
1311 inclusion topology and thermodynamics are listed in this table in sheet 1-4. Mice was infected with  
1312 X31 and treated with PBS or nucleozin for the analysis of number of inclusion and topology in  
1313 lung slices (Sheet 8).

1314

1315 **Table S2:** Differential analysis of protein solubility changes before and after nucleozin treatment  
1316 at 12 hours post infection in WT and Rab11a-DN cell lines

1317 PR8-infected Rab11a-WT and Rab11a-DN cells were treated with either DMSO (vehicle) or 5  $\mu$ M  
1318 of nucleozin for 1 hour. The protein solubility changes upon nucleozin (or DMSO) treatment in  
1319 RAB11a-WT and Rab11a-DN cells is listed in this table.

1320

1321 **Table S3:** Differential analysis of protein abundance changes before and after nucleozin  
1322 treatment at 12 hours post infection in WT and Rab11a-DN cell lines

1323 PR8-infected Rab11a-WT and Rab11a-DN cells were treated with either DMSO (vehicle) or 5  $\mu$ M  
1324 of nucleozin for 1 hour. The protein abundance changes upon nucleozin (or DMSO) treatment in  
1325 RAB11a-WT and Rab11a-DN cells is listed in this table.

1326

1327 **Supplementary Figures**

1328

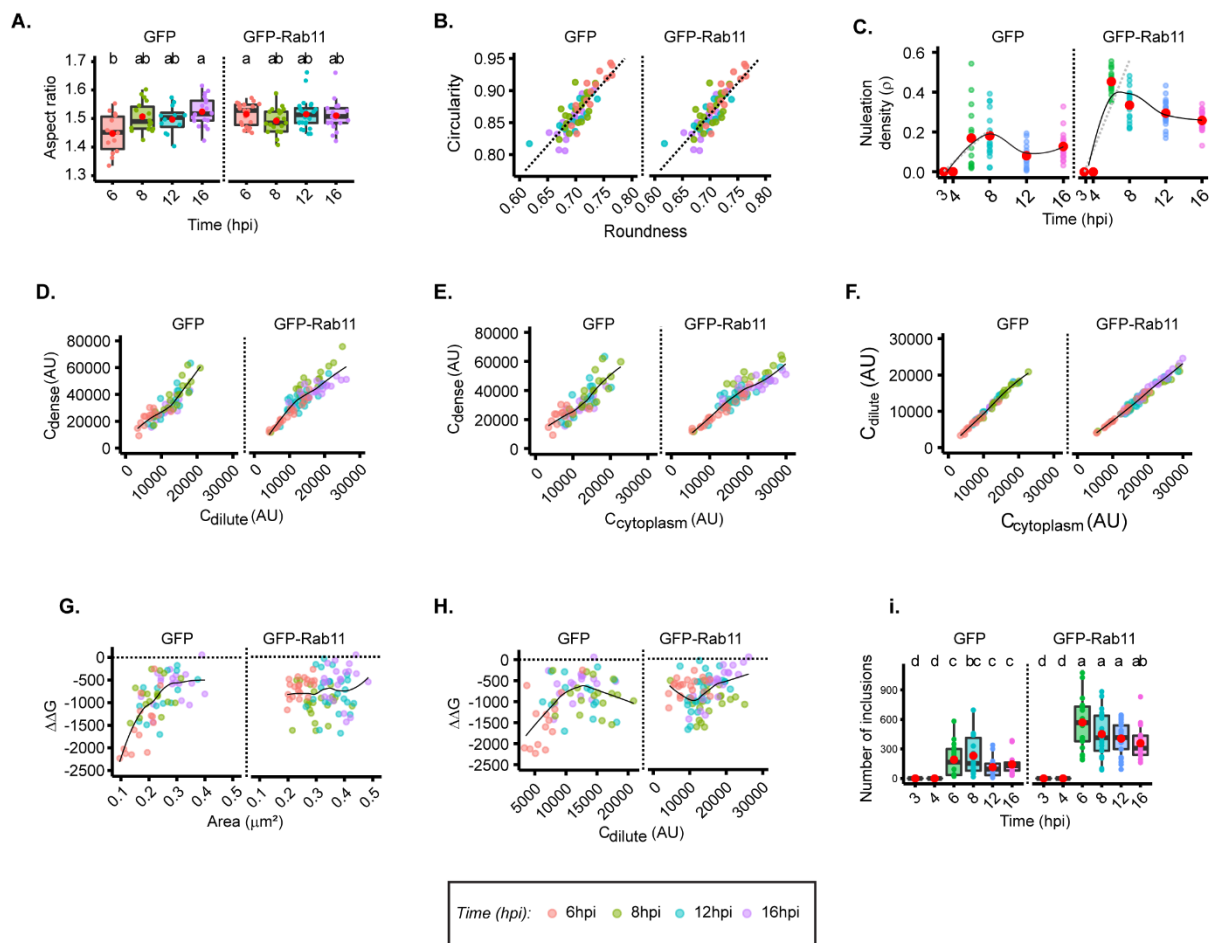

1329

1330

1331 **Figure S1. Change in vRNP and Rab11a concentration modestly alter inclusions properties.**

1332 (A - H) A549 cells stably expressing GFP, or Rab11a-WT, as indicated, were infected at a MOI of 3 with  
 1333 PR8 virus and, at the indicated time points, were fixed, and analysed by immunofluorescence using  
 1334 antibody against NP (as a proxy for vRNPs). The cytoplasmic vRNP concentration increases with time of  
 1335 infection (hpi) and was used as a proxy for cytoplasmic vRNP concentration changes. Each dot is the  
 1336 average value of measured parameter within or outside IAV inclusions per cell, while the continuous black  
 1337 lines are non-linear fitted models for all data. Above each boxplot, same letters indicate no significant  
 1338 difference between them, while different letters indicate a statistical significance at  $\alpha = 0.05$  using one-way  
 1339 ANOVA, followed by Tukey multiple comparisons of means for parametric analysis, or Kruskal-Wallis  
 1340 Bonferroni treatment for non-parametric analysis. Abbreviations: AU, arbitrary unit.

1341 (A) Boxplot of inclusion aspect ratio at different hpi.  $P = 0.033422$ ; Kruskal Wallis Bonferroni treatment.

1342 (B) Scatter plot of inclusion circularity versus roundness at different time post infection (hpi).

- 1343 (C) Dot plot and model depicting nucleation density ( $\rho$ ,  $\mu\text{m}^{-2}$ ) over time of infection (hpi).  $P = 0.001$ ; Kruskal  
1344 Wallis Bonferroni treatment.
- 1345 (D) Scatter plot of  $C_{\text{dense}}$  (AU) versus  $C_{\text{dilute}}$  (AU) at different hpi.
- 1346 (E) Scatter plot of  $C_{\text{dense}}$  (AU) and  $C_{\text{cytoplasm}}$  (AU).
- 1347 (F) Scatter plot of  $C_{\text{dilute}}$  (AU) versus  $C_{\text{cytoplasm}}$  (AU) with time of infection. Coloured lines are non-linear fitted  
1348 models of the data points in the graph
- 1349 (G - H) Conditions were normalized to an infection state without IAV inclusions (3 hpi) that is indicated by  
1350 the dashed black line.
- 1351 (G) Scatter plot of  $\Delta\Delta G$  ( $\text{J}\cdot\text{mol}^{-1}$ ) relative to 3 hpi versus area of inclusion.
- 1352 (H) Scatter plot of  $\Delta\Delta G$  versus  $C_{\text{dilute}}$  (AU) with time of IAV infection.
- 1353 (I) Boxplot of inclusion number per cell at different hpi.  $P = 0.001$ ; Kruskal Wallis Bonferroni treatment.  
1354

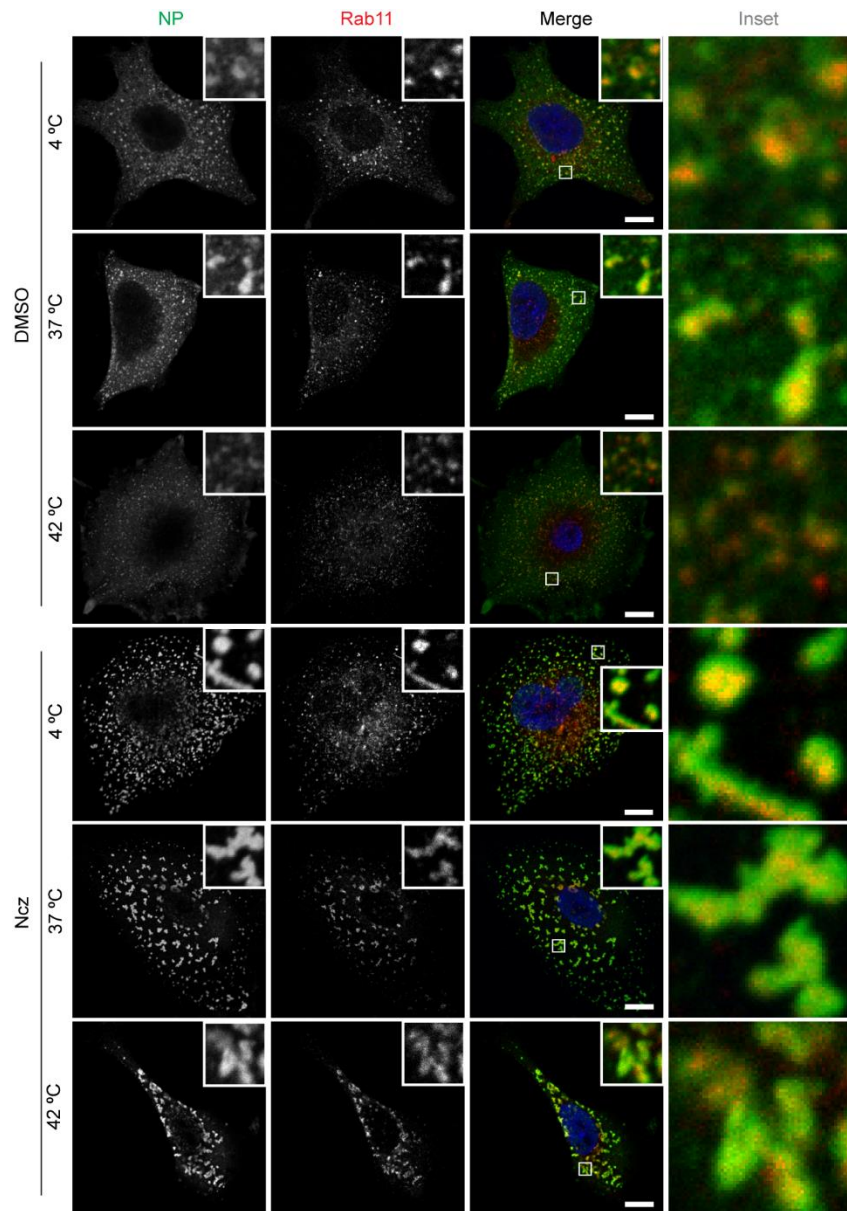

1355

1356 **Figure S2. Hardened inclusions are thermally stable**

1357 A459 cells were infected with PR8 at a MOI of 3. At 7.5 hpi the infected cells were treated with 5  $\mu$ M Ncz  
1358 or DMSO for 30 mins at 37°C before being subjected to thermal stress at 4°C, 37°C and 42°C for 20mins  
1359 and fixed for immunofluorescence analysis by staining with antibody against NP (green), Rab11 (red) and  
1360 nucleus (blue). Representative images with Scale Bar = 10  $\mu$ m.

1361

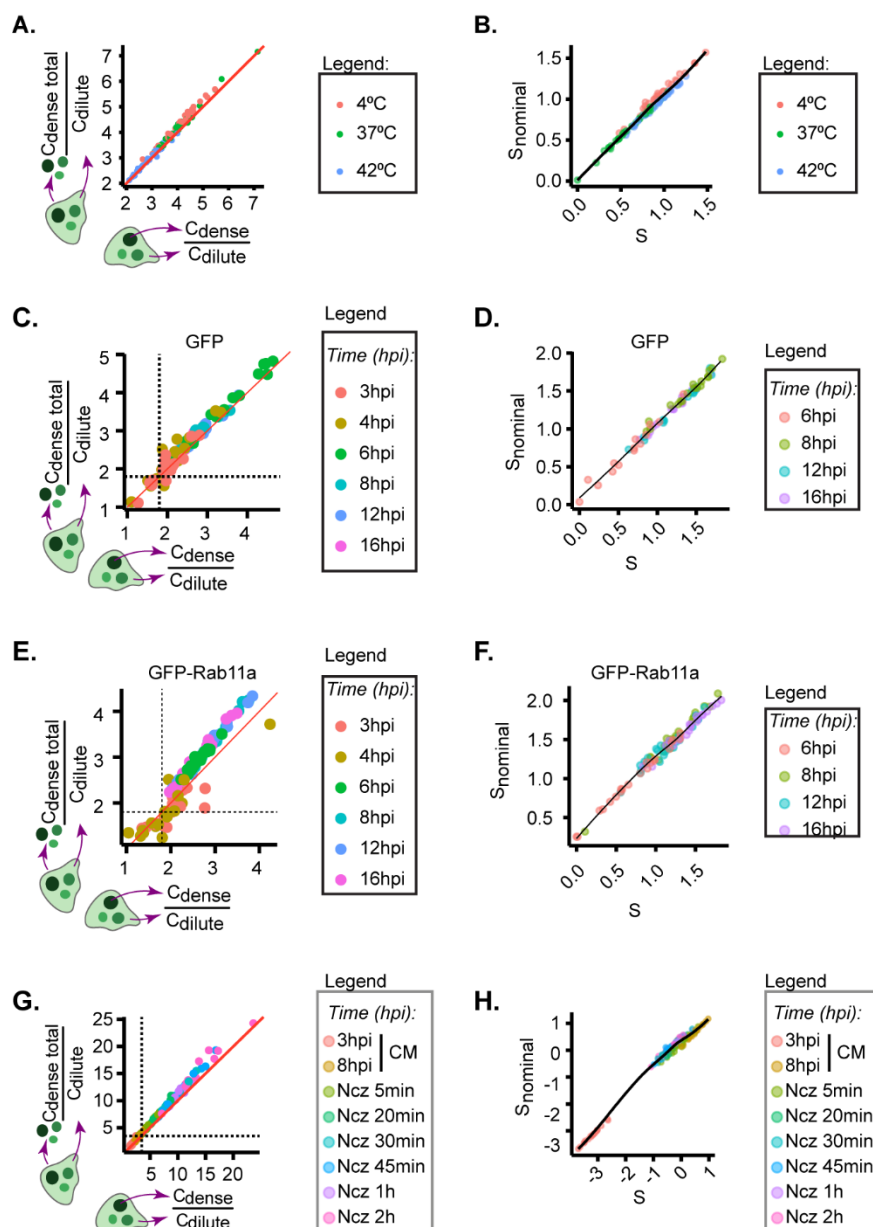

1362

1363

1364 **Figure S3. Validation of method analysing thermodynamics parameters.**

1365 A549 cells expressing (A – D, G – H) endogenous levels of Rab11a or (E - F) over expressing Rab11a  
 1366 were infected at a MOI of 3 with PR8 virus for (A – B, G - H) 8 h before incubating the cells at the indicated  
 1367 (A - B) temperatures, (G - H) Ncz residence time or (C - F) at the indicated timepoints. After this, the cells  
 1368 were fixed, and analysed by immunofluorescence using antibody against NP (as a proxy for vRNPs). Each  
 1369 dot is the average value of measured parameter within or outside IAV inclusions per cell, while the  
 1370 continuous black lines are non-linear fitted models for all data. (A, C, E, G) are the scatterplots comparing  
 1371 image segmentation strategies to calculate partition coefficient and extrapolate the free energy (see  
 1372 *Methods*) while (B,D,F,H) is a scatter plot comparing methods for calculating the degree of supersaturation.
