# Supplementary material for: Rules for hardening influenza A virus liquid condensates
Source: bioRxiv preprint, doi:10.1101/2022.08.03.502602, version 2 (2022-11-07)
Supplement: Table S2 [file 502602_file03.xlsx]

## Sheet: DEP_protein_solubility_all_cell
gene_name	protein_id	description	mw	max.qupm	average.top3	logFC	AveExpr	t	p_value	FDR_limma	B	comparison	annotation
KHDRBS1	Q07666	KH domain-containing, RNA-binding, signal transduction-associated protein 1 OS=Homo sapiens OX=9606 GN=KHDRBS1 PE=1 SV=1	55612.2	7	8.20129	-1.38862	-1.14007	-6.13474	0.000117781	0.649562	-3.68124	CA	no_hit
STK38L	Q9Y2H1	Serine/threonine-protein kinase 38-like OS=Homo sapiens OX=9606 GN=STK38L PE=1 SV=3	65756.4	4	6.91017	0.580128	0.433644	3.98019	0.00267867	0.999039	-3.92943	CA	no_hit
TRAPPC13	A5PLN9|A5PLN9-2|A5PLN9-4|A5PLN9-5	Trafficking protein particle complex subunit 13 OS=Homo sapiens OX=9606 GN=TRAPPC13 PE=1 SV=2|Isoform 2 of Trafficking protein particle complex subunit 13 OS=Homo sapiens OX=9606 GN=TRAPPC13|Isoform 3 of Trafficking protein particle complex subunit 13 OS=Homo sapiens OX=9606 GN=TRAPPC13|Isoform 4 of Trafficking protein particle complex subunit 13 OS=Homo sapiens OX=9606 GN=TRAPPC13	54782.9|54194.6|54281.7|54869.9	6	7.19119	0.589386	-0.0240338	3.92696	0.0029174	0.999039	-3.93822	CA	no_hit
ZNF207	J3QRS9|O43670|O43670-2|O43670-4|X6R4W8	BUB3-interacting and GLEBS motif-containing protein ZNF207 OS=Homo sapiens OX=9606 GN=ZNF207 PE=1 SV=1|BUB3-interacting and GLEBS motif-containing protein ZNF207 OS=Homo sapiens OX=9606 GN=ZNF207 PE=1 SV=1|Isoform 2 of BUB3-interacting and GLEBS motif-containing protein ZNF207 OS=Homo sapiens OX=9606 GN=ZNF207|Isoform 4 of BUB3-interacting and GLEBS motif-containing protein ZNF207 OS=Homo sapiens…	60758.6|58607.4|57607.0|60910.6|59411.5	6	7.85029	-1.10665	-0.343608	-3.89748	0.00305912	0.999039	-3.94316	CA	no_hit
PPP1R12C	K7EL81|Q9BZL4-3|Q9BZL4|Q9BZL4-2|Q9BZL4-4	Protein phosphatase 1 regulatory subunit 12C (Fragment) OS=Homo sapiens OX=9606 GN=PPP1R12C PE=1 SV=1|Isoform 3 of Protein phosphatase 1 regulatory subunit 12C OS=Homo sapiens OX=9606 GN=PPP1R12C|Protein phosphatase 1 regulatory subunit 12C OS=Homo sapiens OX=9606 GN=PPP1R12C PE=1 SV=1|Isoform 2 of Protein phosphatase 1 regulatory subunit 12C OS=Homo sapiens OX=9606 GN=PPP1R12C|Isoform 3 of Prote…	88932.3|93300.6|93499.6|85639.5|93428.6	11	6.77887	-0.747627	-0.043866	-3.56602	0.00525237	0.999039	-4.00214	CA	no_hit
LGALS8	F6V2D4|O00214|O00214-2	Galectin OS=Homo sapiens OX=9606 GN=LGALS8 PE=1 SV=1|Galectin-8 OS=Homo sapiens OX=9606 GN=LGALS8 PE=1 SV=4|Isoform 2 of Galectin-8 OS=Homo sapiens OX=9606 GN=LGALS8	40580.0|41736.5|47901.0	4	6.9166	0.502076	-0.627088	3.53272	0.00554938	0.999039	-4.00843	CA	no_hit
ISG20	H0YMM4|Q96AZ6	Interferon-stimulated gene 20 kDa protein (Fragment) OS=Homo sapiens OX=9606 GN=ISG20 PE=1 SV=1|Interferon-stimulated gene 20 kDa protein OS=Homo sapiens OX=9606 GN=ISG20 PE=1 SV=2	18814.8|22651.1	5	7.0058	0.437259	0.0557613	3.48743	0.00598147	0.999039	-4.01708	CA	no_hit
NDUFA12	Q9UI09	NADH dehydrogenase [ubiquinone] 1 alpha subcomplex subunit 12 OS=Homo sapiens OX=9606 GN=NDUFA12 PE=1 SV=1	20754.1	10	7.8214	0.701908	0.634163	3.44038	0.00646741	0.999039	-4.02619	CA	no_hit
RPIA	P49247	Ribose-5-phosphate isomerase OS=Homo sapiens OX=9606 GN=RPIA PE=1 SV=3	38096.2	4	7.11911	0.756482	0.460795	3.35556	0.00744941	0.999039	-4.04296	CA	no_hit
PSMB10	P40306	Proteasome subunit beta type-10 OS=Homo sapiens OX=9606 GN=PSMB10 PE=1 SV=1	32549.4	2	6.75836	0.536436	0.612548	3.23445	0.00912581	0.999039	-4.06766	CA	no_hit
BAG1	J3QTA2|Q99933|Q99933-2|Q99933-3|Q99933-4	BAG family molecular chaperone regulator 1 OS=Homo sapiens OX=9606 GN=BAG1 PE=1 SV=1|BAG family molecular chaperone regulator 1 OS=Homo sapiens OX=9606 GN=BAG1 PE=1 SV=4|Isoform 2 of BAG family molecular chaperone regulator 1 OS=Homo sapiens OX=9606 GN=BAG1|Isoform 3 of BAG family molecular chaperone regulator 1 OS=Homo sapiens OX=9606 GN=BAG1|Isoform 4 of BAG family molecular chaperone regulator…	46570.3|46588.3|41347.5|38931.2|32893.1	4	6.93412	0.498405	0.123983	3.19313	0.00978268	0.999039	-4.07629	CA	no_hit
NDUFA13	Q9P0J0	NADH dehydrogenase [ubiquinone] 1 alpha subcomplex subunit 13 OS=Homo sapiens OX=9606 GN=NDUFA13 PE=1 SV=3	18512.8	6	7.65317	0.51924	0.591761	3.17773	0.0100399	0.999039	-4.07953	CA	no_hit
NCAP	P03466	Nucleoprotein OS=Influenza A virus (strain A/Puerto Rico/8/1934 H1N1) OX=211044 GN=NCAP PE=1 SV=2	62904.4	40	9.90972	-0.900962	-3.8993	-3.15986	0.0103468	0.999039	-4.08331	CA	no_hit
SLC44A1	Q8WWI5|Q8WWI5-2|Q8WWI5-3	Choline transporter-like protein 1 OS=Homo sapiens OX=9606 GN=SLC44A1 PE=1 SV=1|Isoform 2 of Choline transporter-like protein 1 OS=Homo sapiens OX=9606 GN=SLC44A1|Isoform 3 of Choline transporter-like protein 1 OS=Homo sapiens OX=9606 GN=SLC44A1	85135.9|85738.5|85150.0	5	6.80586	2.01699	0.0594037	3.11632	0.0111359	0.999039	-4.0926	CA	no_hit
TRIM24	O15164|O15164-2	Transcription intermediary factor 1-alpha OS=Homo sapiens OX=9606 GN=TRIM24 PE=1 SV=3|Isoform Short of Transcription intermediary factor 1-alpha OS=Homo sapiens OX=9606 GN=TRIM24	138774.0|134963.0	7	6.64431	-0.643337	-0.435745	-3.11054	0.0112453	0.999039	-4.09384	CA	no_hit
PDPK1	E9PER6|O15530|O15530-2|O15530-3	3-phosphoinositide-dependent protein kinase 1 OS=Homo sapiens OX=9606 GN=PDPK1 PE=1 SV=1|3-phosphoinositide-dependent protein kinase 1 OS=Homo sapiens OX=9606 GN=PDPK1 PE=1 SV=1|Isoform 2 of 3-phosphoinositide-dependent protein kinase 1 OS=Homo sapiens OX=9606 GN=PDPK1|Isoform 3 of 3-phosphoinositide-dependent protein kinase 1 OS=Homo sapiens OX=9606 GN=PDPK1|3-phosphoinositide-dependent protein …	72249.7|75185.0|69957.5|71765.3	8	6.98613	0.738789	0.385378	3.10714	0.0113101	0.999039	-4.09458	CA	no_hit
SPRYD4	Q8WW59	SPRY domain-containing protein 4 OS=Homo sapiens OX=9606 GN=SPRYD4 PE=1 SV=2	26270.1	8	7.43548	1.0192	0.405872	3.06862	0.0120714	0.999039	-4.10291	CA	no_hit
PLS3	P13797	Plastin-3 OS=Homo sapiens OX=9606 GN=PLS3 PE=1 SV=4	86489.8	28	8.44578	0.428394	0.462189	3.04626	0.0125372	0.999039	-4.10779	CA	no_hit
MCTS1	Q9ULC4|Q9ULC4-3	Malignant T-cell-amplified sequence 1 OS=Homo sapiens OX=9606 GN=MCTS1 PE=1 SV=1|Isoform 3 of Malignant T-cell-amplified sequence 1 OS=Homo sapiens OX=9606 GN=MCTS1	26549.8|26240.6	6	7.84258	0.691118	0.376899	3.04275	0.0126118	0.999039	-4.10855	CA	no_hit
SUDS3	Q9H7L9	Sin3 histone deacetylase corepressor complex component SDS3 OS=Homo sapiens OX=9606 GN=SUDS3 PE=1 SV=2	48265.3	3	6.44083	-0.98908	-0.78166	-2.98827	0.0138323	0.999039	-4.12057	CA	no_hit
MIEF1	B0QY95|L0R8F8|Q9NQG6	Mitochondrial dynamics protein MID51 OS=Homo sapiens OX=9606 GN=MIEF1 PE=1 SV=1|MIEF1 upstream open reading frame protein OS=Homo sapiens OX=9606 GN=MIEF1 PE=1 SV=1|Mitochondrial dynamics protein MID51 OS=Homo sapiens OX=9606 GN=MIEF1 PE=1 SV=1|MIEF1 upstream open reading frame protein OS=Homo sapiens OX=9606 GN=MIEF1 PE=1 SV=1|Mitochondrial dynamics protein MID51 OS=Homo sapiens OX=9606 GN=MIEF1…	61055.1|9656.41|58105.2	3	6.77006	0.691999	0.2624	2.98256	0.013967	0.999039	-4.12184	CA	no_hit
PGM2	Q96G03	Phosphoglucomutase-2 OS=Homo sapiens OX=9606 GN=PGM2 PE=1 SV=4	83355.5	17	7.74335	0.414746	0.307526	2.96444	0.0144034	0.999039	-4.12588	CA	no_hit
DNAJC21	Q5F1R6|Q5F1R6-2|Q5F1R6-3	DnaJ homolog subfamily C member 21 OS=Homo sapiens OX=9606 GN=DNAJC21 PE=1 SV=2|Isoform 2 of DnaJ homolog subfamily C member 21 OS=Homo sapiens OX=9606 GN=DNAJC21|Isoform 3 of DnaJ homolog subfamily C member 21 OS=Homo sapiens OX=9606 GN=DNAJC21	82523.1|89267.7|84482.3	4	6.52576	-0.561262	-1.97286	-2.92371	0.0154353	0.999039	-4.13503	CA	no_hit
SAP130	A0A2R8YDB8|H7BXF5|Q9H0E3|Q9H0E3-3	Histone deacetylase complex subunit SAP130 OS=Homo sapiens OX=9606 GN=SAP130 PE=1 SV=1|Histone deacetylase complex subunit SAP130 OS=Homo sapiens OX=9606 GN=SAP130 PE=1 SV=1|Histone deacetylase complex subunit SAP130 OS=Homo sapiens OX=9606 GN=SAP130 PE=1 SV=1|Isoform 3 of Histone deacetylase complex subunit SAP130 OS=Homo sapiens OX=9606 GN=SAP130	125148.0|125077.0|123812.0|127757.0	3	6.4563	-0.637009	-0.714378	-2.89893	0.0160997	0.999039	-4.14065	CA	no_hit
NCOR1	O75376	Nuclear receptor corepressor 1 OS=Homo sapiens OX=9606 GN=NCOR1 PE=1 SV=2	314154	16	7.12765	-0.834518	-0.823569	-2.8971	0.0161497	0.999039	-4.14106	CA	no_hit
FIG4	Q92562	Polyphosphoinositide phosphatase OS=Homo sapiens OX=9606 GN=FIG4 PE=1 SV=1	119882	4	6.35237	0.542005	0.0106208	2.88663	0.01644	0.999039	-4.14345	CA	no_hit
CDR2	Q01850	Cerebellar degeneration-related protein 2 OS=Homo sapiens OX=9606 GN=CDR2 PE=1 SV=2	62812.4	4	6.5995	-0.50142	0.226669	-2.86226	0.0171362	0.999039	-4.14902	CA	no_hit
REEP3	Q6NUK4|A0A0U1RR85|Q6NUK4-2	Receptor expression-enhancing protein 3 OS=Homo sapiens OX=9606 GN=REEP3 PE=1 SV=1|Receptor expression-enhancing protein (Fragment) OS=Homo sapiens OX=9606 GN=REEP3 PE=1 SV=1|Receptor expression-enhancing protein 3 OS=Homo sapiens OX=9606 GN=REEP3 PE=1 SV=1|Isoform 2 of Receptor expression-enhancing protein 3 OS=Homo sapiens OX=9606 GN=REEP3	36850.4|11265.3|20030.1	4	7.22959	0.468199	-0.224943	2.8428	0.0177135	0.999039	-4.15349	CA	no_hit
TP53BP2	Q13625|Q13625-2|Q13625-3	Apoptosis-stimulating of p53 protein 2 OS=Homo sapiens OX=9606 GN=TP53BP2 PE=1 SV=2|Isoform 2 of Apoptosis-stimulating of p53 protein 2 OS=Homo sapiens OX=9606 GN=TP53BP2|Isoform 3 of Apoptosis-stimulating of p53 protein 2 OS=Homo sapiens OX=9606 GN=TP53BP2	147213.0|131592.0|148223.0	6	6.58023	-0.584348	-0.268489	-2.8393	0.0178191	0.999039	-4.1543	CA	no_hit
CP	E9PFZ2|H7C5R1|P00450	Ceruloplasmin OS=Homo sapiens OX=9606 GN=CP PE=1 SV=1|Ceruloplasmin (Fragment) OS=Homo sapiens OX=9606 GN=CP PE=1 SV=1|Ceruloplasmin OS=Homo sapiens OX=9606 GN=CP PE=1 SV=1|Ceruloplasmin OS=Homo sapiens OX=9606 GN=CP PE=1 SV=1|Ceruloplasmin OS=Homo sapiens OX=9606 GN=CP PE=1 SV=1	128962.0|112633.0|143061.0	3	6.40527	1.60694	-0.298611	2.8121	0.018664	0.999039	-4.16059	CA	no_hit
NCOR2	C9J0Q5|C9JE98|Q9Y618|Q9Y618-4|Q9Y618-5|A0A384DVL6|C9J7T7	Nuclear receptor corepressor 2 OS=Homo sapiens OX=9606 GN=NCOR2 PE=1 SV=2|Nuclear receptor corepressor 2 OS=Homo sapiens OX=9606 GN=NCOR2 PE=1 SV=1|Nuclear receptor corepressor 2 OS=Homo sapiens OX=9606 GN=NCOR2 PE=1 SV=3|Isoform 3 of Nuclear receptor corepressor 2 OS=Homo sapiens OX=9606 GN=NCOR2|Isoform 4 of Nuclear receptor corepressor 2 OS=Homo sapiens OX=9606 GN=NCOR2|Nuclear receptor corepr…	318058.0|312977.0|318644.0|316925.0|311844.0|258196.0|256477.0	24	7.32121	-0.64267	-0.278154	-2.80977	0.0187383	0.999039	-4.16113	CA	no_hit
RBSN	Q9H1K0	Rabenosyn-5 OS=Homo sapiens OX=9606 GN=RBSN PE=1 SV=2	103911	5	6.37425	-0.63226	0.122568	-2.80225	0.0189801	0.999039	-4.16288	CA	no_hit
TMEM65	Q6PI78	Transmembrane protein 65 OS=Homo sapiens OX=9606 GN=TMEM65 PE=1 SV=2	28200.2	2	7.05509	0.465897	0.14078	2.79418	0.0192429	0.999039	-4.16476	CA	no_hit
DARS1	P14868|C9JLC1	Aspartate--tRNA ligase, cytoplasmic OS=Homo sapiens OX=9606 GN=DARS1 PE=1 SV=2|Aspartyl-tRNA synthetase 1 (Fragment) OS=Homo sapiens OX=9606 GN=DARS1 PE=1 SV=1|Aspartate--tRNA ligase, cytoplasmic OS=Homo sapiens OX=9606 GN=DARS1 PE=1 SV=2	66321.2|24146.3	30	8.43192	0.339981	-0.0418673	2.78937	0.0194012	0.999039	-4.16588	CA	no_hit
QARS1	P47897	Glutamine--tRNA ligase OS=Homo sapiens OX=9606 GN=QARS1 PE=1 SV=1	102649	32	8.22105	0.399332	-0.141089	2.78732	0.0194689	0.999039	-4.16636	CA	no_hit
OTUD4	Q01804	OTU domain-containing protein 4 OS=Homo sapiens OX=9606 GN=OTUD4 PE=1 SV=4	146117	9	7.06512	-0.561742	-0.572234	-2.77308	0.0199475	0.999039	-4.16969	CA	no_hit
ATXN2	A0A2R8Y5A6|A0A2R8YDM9	Ataxin-2 OS=Homo sapiens OX=9606 GN=ATXN2 PE=1 SV=1|Ataxin-2 OS=Homo sapiens OX=9606 GN=ATXN2 PE=1 SV=1	141901.0|120484.0	16	7.35738	-0.700427	-1.39571	-2.74845	0.0208026	0.999039	-4.17548	CA	no_hit
TBC1D22A	A0A0A0MRY0|Q8WUA7|Q8WUA7-4	TBC1 domain family member 22A OS=Homo sapiens OX=9606 GN=TBC1D22A PE=1 SV=1|TBC1 domain family member 22A OS=Homo sapiens OX=9606 GN=TBC1D22A PE=1 SV=2|Isoform 4 of TBC1 domain family member 22A OS=Homo sapiens OX=9606 GN=TBC1D22A	62196.3|66422.7|59996.1	5	6.89979	0.371454	0.0400726	2.74636	0.020877	0.999039	-4.17597	CA	no_hit
IVD	A0A0A0MT83|P26440|A0A0S2Z4K7|P26440-2	Isovaleryl-CoA dehydrogenase isoform 1 OS=Homo sapiens OX=9606 GN=IVD PE=1 SV=2|Isovaleryl-CoA dehydrogenase, mitochondrial OS=Homo sapiens OX=9606 GN=IVD PE=1 SV=2|Isovaleryl-CoA dehydrogenase isoform 1 OS=Homo sapiens OX=9606 GN=IVD PE=1 SV=2|Isovaleryl-CoA dehydrogenase isoform 2 (Fragment) OS=Homo sapiens OX=9606 GN=IVD PE=1 SV=1|Isovaleryl-CoA dehydrogenase, mitochondrial OS=Homo sapiens OX=…	54103.8|54434.9|49598.3|49929.4	10	7.46866	0.38994	0.423073	2.73196	0.0213957	0.999039	-4.17937	CA	no_hit
PRPF18	Q99633	Pre-mRNA-splicing factor 18 OS=Homo sapiens OX=9606 GN=PRPF18 PE=1 SV=1	50653.3	3	6.65645	0.395336	0.0776027	2.71699	0.021949	0.999039	-4.18291	CA	no_hit
WAC	Q9BTA9|Q9BTA9-5	WW domain-containing adapter protein with coiled-coil OS=Homo sapiens OX=9606 GN=WAC PE=1 SV=3|Isoform 4 of WW domain-containing adapter protein with coiled-coil OS=Homo sapiens OX=9606 GN=WAC|WW domain-containing adapter protein with coiled-coil OS=Homo sapiens OX=9606 GN=WAC PE=1 SV=3	81974.7|68936.9	6	6.9536	-0.736442	0.113872	-2.69813	0.0226663	0.999039	-4.18739	CA	no_hit
KIAA1217	Q5T5P2|Q5T5P2-3	Sickle tail protein homolog OS=Homo sapiens OX=9606 GN=KIAA1217 PE=1 SV=2|Isoform 3 of Sickle tail protein homolog OS=Homo sapiens OX=9606 GN=KIAA1217	254461.0|193136.0	8	6.66466	-0.562556	-0.544695	-2.69387	0.0228317	0.999039	-4.18841	CA	no_hit
HAUS8	Q9BT25|Q9BT25-3	HAUS augmin-like complex subunit 8 OS=Homo sapiens OX=9606 GN=HAUS8 PE=1 SV=3|Isoform 3 of HAUS augmin-like complex subunit 8 OS=Homo sapiens OX=9606 GN=HAUS8	55895.5|55824.4	3	6.51727	-0.720962	0.242899	-2.6919	0.0229085	0.999039	-4.18888	CA	no_hit
DIS3L	Q8TF46|Q8TF46-2|Q8TF46-4	DIS3-like exonuclease 1 OS=Homo sapiens OX=9606 GN=DIS3L PE=1 SV=2|Isoform 2 of DIS3-like exonuclease 1 OS=Homo sapiens OX=9606 GN=DIS3L|Isoform 4 of DIS3-like exonuclease 1 OS=Homo sapiens OX=9606 GN=DIS3L	142271.0|123921.0|130860.0	5	6.43393	-0.612248	-0.243495	-2.68798	0.0230623	0.999039	-4.18981	CA	no_hit
DCXR	J3KS22|Q7Z4W1|J3QS36	L-xylulose reductase (Fragment) OS=Homo sapiens OX=9606 GN=DCXR PE=1 SV=8|L-xylulose reductase OS=Homo sapiens OX=9606 GN=DCXR PE=1 SV=2|L-xylulose reductase (Fragment) OS=Homo sapiens OX=9606 GN=DCXR PE=1 SV=8|L-xylulose reductase (Fragment) OS=Homo sapiens OX=9606 GN=DCXR PE=1 SV=1|L-xylulose reductase OS=Homo sapiens OX=9606 GN=DCXR PE=1 SV=2	26450.3|28615.3|26240.2	9	7.47546	0.913162	0.640163	2.68611	0.0231357	0.999039	-4.19026	CA	no_hit
DDX39B	Q13838|Q13838-2	Spliceosome RNA helicase DDX39B OS=Homo sapiens OX=9606 GN=DDX39B PE=1 SV=1|Isoform 2 of Spliceosome RNA helicase DDX39B OS=Homo sapiens OX=9606 GN=DDX39B	58238.1|59925.1	9	8.59658	0.862309	0.0499324	2.67878	0.0234271	0.999039	-4.19201	CA	no_hit
HNRNPDL	A0A087WUK2|O14979	Heterogeneous nuclear ribonucleoprotein D-like OS=Homo sapiens OX=9606 GN=HNRNPDL PE=1 SV=1|Heterogeneous nuclear ribonucleoprotein D-like OS=Homo sapiens OX=9606 GN=HNRNPDL PE=1 SV=3	48704.5|55097.9	11	8.1534	0.362864	-2.42545	2.67702	0.0234974	0.999039	-4.19243	CA	no_hit
MGLL	A0A0C4DFN3|Q99685|Q99685-2	Monoglyceride lipase OS=Homo sapiens OX=9606 GN=MGLL PE=1 SV=1|Monoglyceride lipase OS=Homo sapiens OX=9606 GN=MGLL PE=1 SV=2|Monoglyceride lipase OS=Homo sapiens OX=9606 GN=MGLL PE=1 SV=1|Monoglyceride lipase OS=Homo sapiens OX=9606 GN=MGLL PE=1 SV=2|Isoform 2 of Monoglyceride lipase OS=Homo sapiens OX=9606 GN=MGLL	38453.4|37423.0|34703.1	9	7.57078	0.474709	0.339731	2.65993	0.0241922	0.999039	-4.19653	CA	no_hit
GAN	Q9H2C0	Gigaxonin OS=Homo sapiens OX=9606 GN=GAN PE=1 SV=1	77500.1	9	7.13887	0.646193	0.197991	2.6246	0.0256947	0.999039	-4.20504	CA	no_hit
NDUFB3	O43676	NADH dehydrogenase [ubiquinone] 1 beta subcomplex subunit 3 OS=Homo sapiens OX=9606 GN=NDUFB3 PE=1 SV=3	14741	5	7.74926	0.457826	0.623829	2.61365	0.026179	0.999039	-4.20769	CA	no_hit
JUP	P14923	Junction plakoglobin OS=Homo sapiens OX=9606 GN=JUP PE=1 SV=3	92168.6	24	8.08911	1.47248	-0.102504	2.60088	0.0267552	0.999039	-4.21079	CA	no_hit
DPYSL3	Q14195-2	Isoform LCRMP-4 of Dihydropyrimidinase-related protein 3 OS=Homo sapiens OX=9606 GN=DPYSL3	85880.9	9	6.97129	0.605409	0.102579	2.59818	0.0268786	0.999039	-4.21145	CA	no_hit
TBCEL	Q5QJ74	Tubulin-specific chaperone cofactor E-like protein OS=Homo sapiens OX=9606 GN=TBCEL PE=1 SV=2	55978.6	3	6.30018	1.58689	0.738503	2.59485	0.0270318	0.999039	-4.21226	CA	no_hit
USP48	Q86UV5|Q86UV5-8	Ubiquitin carboxyl-terminal hydrolase 48 OS=Homo sapiens OX=9606 GN=USP48 PE=1 SV=1|Ubiquitin carboxyl-terminal hydrolase 48 OS=Homo sapiens OX=9606 GN=USP48 PE=1 SV=1|Isoform 8 of Ubiquitin carboxyl-terminal hydrolase 48 OS=Homo sapiens OX=9606 GN=USP48	146619.0|148416.0	14	7.03008	0.382049	-0.0148314	2.59374	0.0270829	0.999039	-4.21253	CA	no_hit
PRKRA	O75569|O75569-2|O75569-3	Interferon-inducible double-stranded RNA-dependent protein kinase activator A OS=Homo sapiens OX=9606 GN=PRKRA PE=1 SV=1|Isoform 2 of Interferon-inducible double-stranded RNA-dependent protein kinase activator A OS=Homo sapiens OX=9606 GN=PRKRA|Isoform 3 of Interferon-inducible double-stranded RNA-dependent protein kinase activator A OS=Homo sapiens OX=9606 GN=PRKRA	41835.5|40668.8|38763.9	5	7.23273	1.33988	-4.73175	2.58269	0.0329876	0.999039	-4.25837	CA	no_hit
BRD3	Q15059|Q15059-2	Bromodomain-containing protein 3 OS=Homo sapiens OX=9606 GN=BRD3 PE=1 SV=1|Isoform 2 of Bromodomain-containing protein 3 OS=Homo sapiens OX=9606 GN=BRD3|Bromodomain-containing protein 3 OS=Homo sapiens OX=9606 GN=BRD3 PE=1 SV=1	106243.0|80962.1	6	7.22056	-0.472396	-0.933051	-2.57887	0.0277783	0.999039	-4.21615	CA	no_hit
SULT1A1	P50225	Sulfotransferase 1A1 OS=Homo sapiens OX=9606 GN=SULT1A1 PE=1 SV=3	40645.6	2	6.51647	0.559023	0.42155	2.57397	0.0280114	0.999039	-4.21735	CA	no_hit
TRIM11	Q96F44|Q96F44-3|R4GMV1	E3 ubiquitin-protein ligase TRIM11 OS=Homo sapiens OX=9606 GN=TRIM11 PE=1 SV=2|Isoform 3 of E3 ubiquitin-protein ligase TRIM11 OS=Homo sapiens OX=9606 GN=TRIM11|E3 ubiquitin-protein ligase TRIM11 OS=Homo sapiens OX=9606 GN=TRIM11 PE=1 SV=1|E3 ubiquitin-protein ligase TRIM11 OS=Homo sapiens OX=9606 GN=TRIM11 PE=1 SV=2|Isoform 3 of E3 ubiquitin-protein ligase TRIM11 OS=Homo sapiens OX=9606 GN=TRIM11	57113.2|56680.9|41765.9	4	6.64056	-0.574108	-0.067095	-2.56986	0.0282085	0.999039	-4.21835	CA	no_hit
ZNF318	Q5VUA4	Zinc finger protein 318 OS=Homo sapiens OX=9606 GN=ZNF318 PE=1 SV=2	304023	2	6.37973	-0.578499	-1.23506	-2.56947	0.0282274	0.999039	-4.21845	CA	no_hit
OGDH	E9PCR7|E9PDF2|Q02218|Q02218-2	2-oxoglutarate dehydrogenase, mitochondrial OS=Homo sapiens OX=9606 GN=OGDH PE=1 SV=1|2-oxoglutarate dehydrogenase, mitochondrial OS=Homo sapiens OX=9606 GN=OGDH PE=1 SV=1|2-oxoglutarate dehydrogenase, mitochondrial OS=Homo sapiens OX=9606 GN=OGDH PE=1 SV=3|Isoform 2 of 2-oxoglutarate dehydrogenase, mitochondrial OS=Homo sapiens OX=9606 GN=OGDH|2-oxoglutarate dehydrogenase, mitochondrial OS=Homo …	134302.0|133938.0|132269.0|131905.0	31	8.17147	0.526982	0.249325	2.56412	0.028486	0.999039	-4.21976	CA	no_hit
NRCAM	C9JYY6|Q92823|Q92823-2|Q92823-3|Q92823-4|Q92823-5|Q92823-6|A0A087X2B3	Neuronal cell adhesion molecule OS=Homo sapiens OX=9606 GN=NRCAM PE=1 SV=3|Neuronal cell adhesion molecule OS=Homo sapiens OX=9606 GN=NRCAM PE=1 SV=3|Isoform 2 of Neuronal cell adhesion molecule OS=Homo sapiens OX=9606 GN=NRCAM|Isoform 3 of Neuronal cell adhesion molecule OS=Homo sapiens OX=9606 GN=NRCAM|Isoform 4 of Neuronal cell adhesion molecule OS=Homo sapiens OX=9606 GN=NRCAM|Isoform 5 of Ne…	157401.0|168687.0|158982.0|153953.0|154027.0|169173.0|155333.0|99116.5	8	6.69984	-0.415234	0.467394	-2.55598	0.0288839	0.999039	-4.22175	CA	no_hit
PDSS2	Q86YH6	Decaprenyl-diphosphate synthase subunit 2 OS=Homo sapiens OX=9606 GN=PDSS2 PE=1 SV=2	50831.1	5	6.95768	0.322874	0.315953	2.53494	0.0299382	0.999039	-4.22691	CA	no_hit
GNAI3	P08754	Guanine nucleotide-binding protein G(i) subunit alpha OS=Homo sapiens OX=9606 GN=GNAI3 PE=1 SV=3	49594.3	5	7.82073	0.37542	-0.326065	2.52805	0.0302918	0.999039	-4.22861	CA	no_hit
PDSS1	Q5T2R2|Q5T2R2-3	Decaprenyl-diphosphate synthase subunit 1 OS=Homo sapiens OX=9606 GN=PDSS1 PE=1 SV=1|Isoform 3 of Decaprenyl-diphosphate synthase subunit 1 OS=Homo sapiens OX=9606 GN=PDSS1	54350.3|49819.9	7	6.76772	1.00092	0.178932	2.52145	0.0306343	0.999039	-4.23024	CA	no_hit
RAB11FIP5	A0A1B0GTL5	Rab11 family-interacting protein 5 OS=Homo sapiens OX=9606 GN=RAB11FIP5 PE=1 SV=1	155079	11	7.75056	-0.398376	-0.576264	-2.50425	0.0315449	0.999039	-4.23448	CA	no_hit
NHEJ1	H7C0G7|Q9H9Q4	Non-homologous end-joining factor 1 (Fragment) OS=Homo sapiens OX=9606 GN=NHEJ1 PE=1 SV=1|Non-homologous end-joining factor 1 OS=Homo sapiens OX=9606 GN=NHEJ1 PE=1 SV=1	28423.8|38278.2	2	6.61708	-0.479348	0.209475	-2.49932	0.031811	0.999039	-4.23571	CA	no_hit
PRXL2A	Q9BRX8|Q9BRX8-2	Peroxiredoxin-like 2A OS=Homo sapiens OX=9606 GN=PRXL2A PE=1 SV=3|Isoform 2 of Peroxiredoxin-like 2A OS=Homo sapiens OX=9606 GN=PRXL2A	32554.0|31253.4	5	7.80166	0.38468	0.235485	2.49845	0.0318585	0.999039	-4.23592	CA	no_hit
RP2	O75695	Protein XRP2 OS=Homo sapiens OX=9606 GN=RP2 PE=1 SV=4	47163.3	6	7.31777	0.629418	0.0814138	2.491	0.0322652	0.999039	-4.23777	CA	no_hit
EPRS1	P07814	Bifunctional glutamate/proline--tRNA ligase OS=Homo sapiens OX=9606 GN=EPRS1 PE=1 SV=5	217102	67	8.61216	0.388095	-0.170599	2.47773	0.033002	0.999039	-4.24106	CA	no_hit
USE1	Q9NZ43	Vesicle transport protein USE1 OS=Homo sapiens OX=9606 GN=USE1 PE=1 SV=2	35854.9	9	7.51952	0.340663	0.136444	2.47371	0.0332288	0.999039	-4.24206	CA	no_hit
ALAD	P13716|P13716-2	Delta-aminolevulinic acid dehydratase OS=Homo sapiens OX=9606 GN=ALAD PE=1 SV=1|Delta-aminolevulinic acid dehydratase OS=Homo sapiens OX=9606 GN=ALAD PE=1 SV=1|Isoform 2 of Delta-aminolevulinic acid dehydratase OS=Homo sapiens OX=9606 GN=ALAD	40378.1|43533.6	8	7.22597	0.436979	0.35263	2.4737	0.0332292	0.999039	-4.24206	CA	no_hit
PITHD1	Q9GZP4|Q9GZP4-2	PITH domain-containing protein 1 OS=Homo sapiens OX=9606 GN=PITHD1 PE=1 SV=1|Isoform 2 of PITH domain-containing protein 1 OS=Homo sapiens OX=9606 GN=PITHD1	26824.5|26767.5	4	7.11534	0.458079	0.500883	2.47337	0.0332481	0.999039	-4.24215	CA	no_hit
VPS26C	A8MTY9|O14972|O14972-2	Vacuolar protein sorting-associated protein 26C OS=Homo sapiens OX=9606 GN=VPS26C PE=1 SV=1|Vacuolar protein sorting-associated protein 26C OS=Homo sapiens OX=9606 GN=VPS26C PE=1 SV=1|Isoform 2 of Vacuolar protein sorting-associated protein 26C OS=Homo sapiens OX=9606 GN=VPS26C	33568.4|39529.6|35379.4	4	6.9847	0.313923	0.355239	2.46872	0.033512	0.999039	-4.2433	CA	no_hit
TNFAIP8	D6RCM8|O95379|O95379-2|O95379-3|O95379-4	Tumor necrosis factor alpha-induced protein 8 OS=Homo sapiens OX=9606 GN=TNFAIP8 PE=1 SV=1|Tumor necrosis factor alpha-induced protein 8 OS=Homo sapiens OX=9606 GN=TNFAIP8 PE=1 SV=1|Isoform 2 of Tumor necrosis factor alpha-induced protein 8 OS=Homo sapiens OX=9606 GN=TNFAIP8|Isoform 3 of Tumor necrosis factor alpha-induced protein 8 OS=Homo sapiens OX=9606 GN=TNFAIP8|Isoform 4 of Tumor necrosis f…	29858.7|29244.1|27984.5|27814.4|30986.2	5	7.22405	0.323248	0.0596505	2.45483	0.0343137	0.999039	-4.24676	CA	no_hit
PTGES2	Q9H7Z7	Prostaglandin E synthase 2 OS=Homo sapiens OX=9606 GN=PTGES2 PE=1 SV=1	47867.7	15	8.13261	0.361887	0.203927	2.44927	0.0346402	0.999039	-4.24815	CA	no_hit
CAPRIN1	Q14444|Q14444-2	Caprin-1 OS=Homo sapiens OX=9606 GN=CAPRIN1 PE=1 SV=2|Isoform 2 of Caprin-1 OS=Homo sapiens OX=9606 GN=CAPRIN1	87006.9|85503.2	13	8.06161	-0.607945	-1.65893	-2.44891	0.0346613	0.999039	-4.24824	CA	no_hit
UBAP1	A0A0D9SG79|Q9NZ09|Q9NZ09-2|Q9NZ09-3|Q9NZ09-4	Ubiquitin-associated protein 1 (Fragment) OS=Homo sapiens OX=9606 GN=UBAP1 PE=1 SV=1|Ubiquitin-associated protein 1 OS=Homo sapiens OX=9606 GN=UBAP1 PE=1 SV=1|Isoform 2 of Ubiquitin-associated protein 1 OS=Homo sapiens OX=9606 GN=UBAP1|Isoform 3 of Ubiquitin-associated protein 1 OS=Homo sapiens OX=9606 GN=UBAP1|Isoform 4 of Ubiquitin-associated protein 1 OS=Homo sapiens OX=9606 GN=UBAP1	68483.7|67235.4|59319.5|69610.4|73441.5	4	6.92354	-0.806695	0.525016	-2.4462	0.034821	0.999039	-4.24892	CA	no_hit
PEX14	O75381|O75381-2	Peroxisomal membrane protein PEX14 OS=Homo sapiens OX=9606 GN=PEX14 PE=1 SV=1|Isoform 2 of Peroxisomal membrane protein PEX14 OS=Homo sapiens OX=9606 GN=PEX14	46744.4|42212.2	5	7.05844	-1.0036	0.233517	-2.44036	0.035169	0.999039	-4.25038	CA	no_hit
FABP5	Q01469	Fatty acid-binding protein 5 OS=Homo sapiens OX=9606 GN=FABP5 PE=1 SV=3	19755.6	10	8.55772	0.799876	0.540821	2.43259	0.0356366	0.999039	-4.25232	CA	no_hit
PATL1	Q86TB9|Q86TB9-4	Protein PAT1 homolog 1 OS=Homo sapiens OX=9606 GN=PATL1 PE=1 SV=2|Isoform 4 of Protein PAT1 homolog 1 OS=Homo sapiens OX=9606 GN=PATL1	97176.5|89934.5	12	7.1557	-0.471401	-0.598156	-2.43237	0.03565	0.999039	-4.25238	CA	no_hit
ADAR	P55265|P55265-4	Double-stranded RNA-specific adenosine deaminase OS=Homo sapiens OX=9606 GN=ADAR PE=1 SV=4|Isoform 4 of Double-stranded RNA-specific adenosine deaminase OS=Homo sapiens OX=9606 GN=ADAR	164253.0|169744.0	47	8.08673	0.427109	-2.83887	2.42261	0.0362465	0.999039	-4.25482	CA	no_hit
SEC16A	F1T0I1|O15027|O15027-2|O15027-3|O15027-4|O15027-5	Protein transport protein sec16 OS=Homo sapiens OX=9606 GN=SEC16A PE=1 SV=1|Protein transport protein Sec16A OS=Homo sapiens OX=9606 GN=SEC16A PE=1 SV=4|Isoform 2 of Protein transport protein Sec16A OS=Homo sapiens OX=9606 GN=SEC16A|Isoform 3 of Protein transport protein Sec16A OS=Homo sapiens OX=9606 GN=SEC16A|Isoform 4 of Protein transport protein Sec16A OS=Homo sapiens OX=9606 GN=SEC16A|Isofor…	269728.0|272195.0|267494.0|269874.0|269815.0|274429.0	25	7.42955	-0.84025	-1.44394	-2.41903	0.0364679	0.999039	-4.25572	CA	no_hit
CTNNB1	A0A2R8Y543|A0A2R8Y5A3|A0A2R8Y804|A0A2R8YCH5|B4DGU4|P35222	Catenin beta-1 OS=Homo sapiens OX=9606 GN=CTNNB1 PE=1 SV=1|Catenin beta-1 OS=Homo sapiens OX=9606 GN=CTNNB1 PE=1 SV=1|Catenin beta-1 OS=Homo sapiens OX=9606 GN=CTNNB1 PE=1 SV=1|Catenin beta-1 (Fragment) OS=Homo sapiens OX=9606 GN=CTNNB1 PE=1 SV=1|Catenin beta-1 OS=Homo sapiens OX=9606 GN=CTNNB1 PE=1 SV=1|Catenin beta-1 OS=Homo sapiens OX=9606 GN=CTNNB1 PE=1 SV=1	86891.7|94467.2|86055.5|93750.7|93248.5|93978.8	16	7.77586	0.613033	-0.0240016	2.4077	0.0371769	0.999039	-4.25857	CA	no_hit
ARFGEF3	Q5TH69	Brefeldin A-inhibited guanine nucleotide-exchange protein 3 OS=Homo sapiens OX=9606 GN=ARFGEF3 PE=1 SV=3	277021	6	6.44869	0.42597	0.0315449	2.40654	0.0372502	0.999039	-4.25886	CA	no_hit
BRD4	O60885	Bromodomain-containing protein 4 OS=Homo sapiens OX=9606 GN=BRD4 PE=1 SV=2	186956	7	6.89128	-0.912448	-0.846107	-2.4021	0.0375322	0.999039	-4.25998	CA	no_hit
MARS1	P56192	Methionine--tRNA ligase, cytoplasmic OS=Homo sapiens OX=9606 GN=MARS1 PE=1 SV=2	116243	31	8.27632	0.343981	-0.119817	2.39852	0.0377614	0.999039	-4.26088	CA	no_hit
ZNF609	O15014	Zinc finger protein 609 OS=Homo sapiens OX=9606 GN=ZNF609 PE=1 SV=2	191291	5	6.80598	-0.639192	-0.7876	-2.39195	0.0381853	0.999039	-4.26253	CA	no_hit
CCDC93	F8W9X7|Q567U6	Coiled-coil domain-containing protein 93 OS=Homo sapiens OX=9606 GN=CCDC93 PE=1 SV=1|Coiled-coil domain-containing protein 93 OS=Homo sapiens OX=9606 GN=CCDC93 PE=1 SV=2	92750.2|92906.3	19	7.42201	0.326891	0.164767	2.39021	0.0382978	0.999039	-4.26297	CA	no_hit
RAD18	Q9NS91	E3 ubiquitin-protein ligase RAD18 OS=Homo sapiens OX=9606 GN=RAD18 PE=1 SV=2	71644.5	7	6.78634	-0.70655	-0.719396	-2.3775	0.0391334	0.999039	-4.26618	CA	no_hit
GPC6	Q9Y625	Glypican-6 OS=Homo sapiens OX=9606 GN=GPC6 PE=1 SV=1	71934.9	5	6.62368	0.417184	-1.01541	2.37525	0.039283	0.999039	-4.26674	CA	no_hit
SNTB1	Q13884	Beta-1-syntrophin OS=Homo sapiens OX=9606 GN=SNTB1 PE=1 SV=3	68406	3	6.78435	1.39024	0.0871126	2.37523	0.0392846	0.999039	-4.26675	CA	no_hit
FAM169A	D6RB01|Q9Y6X4	Soluble lamin-associated protein of 75 kDa OS=Homo sapiens OX=9606 GN=FAM169A PE=1 SV=1|Soluble lamin-associated protein of 75 kDa OS=Homo sapiens OX=9606 GN=FAM169A PE=1 SV=2	79858.0|87723.1	8	7.0009	-0.301034	-0.383884	-2.37478	0.0393149	0.999039	-4.26686	CA	no_hit
MTERF3	E5RIY4|Q96E29|Q96E29-2|Q96E29-3	Transcription termination factor 3, mitochondrial OS=Homo sapiens OX=9606 GN=MTERF3 PE=1 SV=1|Transcription termination factor 3, mitochondrial OS=Homo sapiens OX=9606 GN=MTERF3 PE=1 SV=2|Isoform 2 of Transcription termination factor 3, mitochondrial OS=Homo sapiens OX=9606 GN=MTERF3|Isoform 3 of Transcription termination factor 3, mitochondrial OS=Homo sapiens OX=9606 GN=MTERF3|Transcription ter…	25618.6|57789.8|46762.1|42911.2	6	6.92127	0.428804	-0.693405	2.37467	0.039322	0.999039	-4.26689	CA	no_hit
PPP1R10	Q96QC0	Serine/threonine-protein phosphatase 1 regulatory subunit 10 OS=Homo sapiens OX=9606 GN=PPP1R10 PE=1 SV=1	119112	13	7.35048	-0.71885	-1.22307	-2.37335	0.0394105	0.999039	-4.26723	CA	no_hit
POLDIP3	Q9BY77	Polymerase delta-interacting protein 3 OS=Homo sapiens OX=9606 GN=POLDIP3 PE=1 SV=2	57848.5	8	7.25382	-0.495845	-0.603137	-2.36087	0.0402536	0.999039	-4.27038	CA	no_hit
EIF4ENIF1	B1AKL4|Q9NRA8|Q9NRA8-3	Eukaryotic translation initiation factor 4E transporter OS=Homo sapiens OX=9606 GN=EIF4ENIF1 PE=1 SV=1|Eukaryotic translation initiation factor 4E transporter OS=Homo sapiens OX=9606 GN=EIF4ENIF1 PE=1 SV=2|Isoform 3 of Eukaryotic translation initiation factor 4E transporter OS=Homo sapiens OX=9606 GN=EIF4ENIF1	121950.0|124904.0|125032.0	5	6.79439	-0.406617	-0.252044	-2.35696	0.0405216	0.999039	-4.27137	CA	no_hit
AKAP8	O43823	A-kinase anchor protein 8 OS=Homo sapiens OX=9606 GN=AKAP8 PE=1 SV=1	88191.2	10	7.39978	-0.589966	-1.38895	-2.35422	0.0407102	0.999039	-4.27206	CA	no_hit
TRIOBP	Q9H2D6-5|Q9H2D6|Q9H2D6-2|Q9H2D6-3|Q9H2D6-7	Isoform 1 of TRIO and F-actin-binding protein OS=Homo sapiens OX=9606 GN=TRIOBP|TRIO and F-actin-binding protein OS=Homo sapiens OX=9606 GN=TRIOBP PE=1 SV=3|Isoform 3 of TRIO and F-actin-binding protein OS=Homo sapiens OX=9606 GN=TRIOBP|Isoform 4 of TRIO and F-actin-binding protein OS=Homo sapiens OX=9606 GN=TRIOBP|Isoform 1 of TRIO and F-actin-binding protein OS=Homo sapiens OX=9606 GN=TRIOBP|Is…	79045.7|282073.0|270211.0|263020.0|85714.2	11	7.35759	-0.427811	-0.374537	-2.34581	0.0412953	0.999039	-4.2742	CA	no_hit
MECP2	P51608|P51608-2	Methyl-CpG-binding protein 2 OS=Homo sapiens OX=9606 GN=MECP2 PE=1 SV=1|Isoform B of Methyl-CpG-binding protein 2 OS=Homo sapiens OX=9606 GN=MECP2	72353.2|73235.5	5	7.02276	-0.497149	-2.00705	-2.34463	0.0413779	0.999039	-4.2745	CA	no_hit
ANXA10	Q9UJ72	Annexin A10 OS=Homo sapiens OX=9606 GN=ANXA10 PE=1 SV=3	41777.9	6	7.42457	0.497886	0.29368	2.33729	0.0418961	0.999039	-4.27636	CA	no_hit
SET	Q01105|Q01105-2	Protein SET OS=Homo sapiens OX=9606 GN=SET PE=1 SV=3|Isoform 2 of Protein SET OS=Homo sapiens OX=9606 GN=SET	40465.5|38167.9	10	8.74415	-0.601042	0.142507	-2.33376	0.0421475	0.999039	-4.27726	CA	no_hit
RHBDF2	Q6PJF5|Q6PJF5-2	Inactive rhomboid protein 2 OS=Homo sapiens OX=9606 GN=RHBDF2 PE=1 SV=2|Isoform 2 of Inactive rhomboid protein 2 OS=Homo sapiens OX=9606 GN=RHBDF2	110636.0|106362.0	5	6.96326	0.341862	-0.0595519	2.31889	0.0432231	0.999039	-4.28104	CA	no_hit
VPS72	A0A1W2PPT2|Q15906|Q15906-2	Vacuolar protein sorting-associated protein 72 homolog OS=Homo sapiens OX=9606 GN=VPS72 PE=1 SV=1|Vacuolar protein sorting-associated protein 72 homolog OS=Homo sapiens OX=9606 GN=VPS72 PE=1 SV=1|Isoform 2 of Vacuolar protein sorting-associated protein 72 homolog OS=Homo sapiens OX=9606 GN=VPS72|Vacuolar protein sorting-associated protein 72 homolog OS=Homo sapiens OX=9606 GN=VPS72 PE=1 SV=1|Isof…	26202.6|48098.7|49408.4	5	6.50467	-0.684773	-1.64319	-2.31339	0.0436273	0.999039	-4.28244	CA	no_hit
CNOT2	F8VUB4|F8VV52|Q9NZN8	CCR4-NOT transcription complex subunit 2 OS=Homo sapiens OX=9606 GN=CNOT2 PE=1 SV=2|CCR4-NOT transcription complex subunit 2 (Fragment) OS=Homo sapiens OX=9606 GN=CNOT2 PE=1 SV=1|CCR4-NOT transcription complex subunit 2 OS=Homo sapiens OX=9606 GN=CNOT2 PE=1 SV=1	63638.0|65142.8|66259.4	10	7.3651	-0.665461	0.0428363	-2.31315	0.0436453	0.999039	-4.2825	CA	no_hit
VPS13D	Q5THJ4|Q5THJ4-2	Vacuolar protein sorting-associated protein 13D OS=Homo sapiens OX=9606 GN=VPS13D PE=1 SV=2|Isoform 2 of Vacuolar protein sorting-associated protein 13D OS=Homo sapiens OX=9606 GN=VPS13D	572030.0|569176.0	7	6.28902	0.385048	-0.150614	2.31208	0.0437246	0.999039	-4.28277	CA	no_hit
TJP3	O95049|O95049-3|O95049-4|O95049-5	Tight junction protein ZO-3 OS=Homo sapiens OX=9606 GN=TJP3 PE=1 SV=3|Isoform 3 of Tight junction protein ZO-3 OS=Homo sapiens OX=9606 GN=TJP3|Isoform 4 of Tight junction protein ZO-3 OS=Homo sapiens OX=9606 GN=TJP3|Isoform 6 of Tight junction protein ZO-3 OS=Homo sapiens OX=9606 GN=TJP3|Tight junction protein ZO-3 OS=Homo sapiens OX=9606 GN=TJP3 PE=1 SV=3	111184.0|113267.0|112202.0|106973.0	5	6.65909	-0.413227	-0.259199	-2.30607	0.0441713	0.999039	-4.2843	CA	no_hit
PRR12	Q9ULL5|Q9ULL5-2|A0A3Q5ADB5	Proline-rich protein 12 OS=Homo sapiens OX=9606 GN=PRR12 PE=1 SV=3|Isoform 2 of Proline-rich protein 12 OS=Homo sapiens OX=9606 GN=PRR12|Proline-rich protein 12 OS=Homo sapiens OX=9606 GN=PRR12 PE=1 SV=1|Proline-rich protein 12 OS=Homo sapiens OX=9606 GN=PRR12 PE=1 SV=3|Isoform 2 of Proline-rich protein 12 OS=Homo sapiens OX=9606 GN=PRR12	241696.0|231801.0|154076.0	3	6.29826	-0.553186	-1.23868	-2.30152	0.0445133	0.999039	-4.28547	CA	no_hit
SNRPB	P14678|P14678-2|P14678-3	Small nuclear ribonucleoprotein-associated proteins B and B' OS=Homo sapiens OX=9606 GN=SNRPB PE=1 SV=2|Isoform SM-B of Small nuclear ribonucleoprotein-associated proteins B and B' OS=Homo sapiens OX=9606 GN=SNRPB|Isoform SM-B1 of Small nuclear ribonucleoprotein-associated proteins B and B' OS=Homo sapiens OX=9606 GN=SNRPB	27806.8|26853.4|33510.4	5	7.87015	-0.543137	-0.702002	-2.29694	0.0448597	0.999039	-4.28663	CA	no_hit
MTERF4	Q7Z6M4	Transcription termination factor 4, mitochondrial OS=Homo sapiens OX=9606 GN=MTERF4 PE=1 SV=3	51496.9	3	6.58763	-0.488909	-0.084681	-2.29305	0.0451559	0.999039	-4.28763	CA	no_hit
HEXIM1	O94992	Protein HEXIM1 OS=Homo sapiens OX=9606 GN=HEXIM1 PE=1 SV=1	47880.4	9	7.99463	-0.418593	-0.125579	-2.29179	0.0452519	0.999039	-4.28795	CA	no_hit
RARS1	P54136|P54136-2	Arginine--tRNA ligase, cytoplasmic OS=Homo sapiens OX=9606 GN=RARS1 PE=1 SV=2|Isoform Monomeric of Arginine--tRNA ligase, cytoplasmic OS=Homo sapiens OX=9606 GN=RARS1	92860.6|82326.7	29	8.54706	0.285796	-0.0798576	2.28915	0.0454544	0.999039	-4.28862	CA	no_hit
MFN2	O95140	Mitofusin-2 OS=Homo sapiens OX=9606 GN=MFN2 PE=1 SV=3	100473	13	7.42952	0.310597	0.00597829	2.28737	0.0455919	0.999039	-4.28908	CA	no_hit
PSMA3	G3V4X5|P25788|P25788-2	Proteasome endopeptidase complex OS=Homo sapiens OX=9606 GN=PSMA3 PE=1 SV=1|Proteasome subunit alpha type-3 OS=Homo sapiens OX=9606 GN=PSMA3 PE=1 SV=2|Isoform 2 of Proteasome subunit alpha type-3 OS=Homo sapiens OX=9606 GN=PSMA3|Proteasome subunit alpha type-3 OS=Homo sapiens OX=9606 GN=PSMA3 PE=1 SV=2|Isoform 2 of Proteasome subunit alpha type-3 OS=Homo sapiens OX=9606 GN=PSMA3	24400.8|34118.9|33333.6	13	8.6042	0.438142	0.286571	2.27736	0.0463701	0.999039	-4.29164	CA	no_hit
CSTF2	E9PID8|P33240|P33240-2	Cleavage stimulation factor subunit 2 OS=Homo sapiens OX=9606 GN=CSTF2 PE=1 SV=1|Cleavage stimulation factor subunit 2 OS=Homo sapiens OX=9606 GN=CSTF2 PE=1 SV=1|Isoform 2 of Cleavage stimulation factor subunit 2 OS=Homo sapiens OX=9606 GN=CSTF2	50401.0|64989.2|63282.4	6	7.57423	-1.2863	-0.632773	-2.27094	0.0468761	0.999039	-4.29328	CA	no_hit
LARS1	Q9P2J5	Leucine--tRNA ligase, cytoplasmic OS=Homo sapiens OX=9606 GN=LARS1 PE=1 SV=2	169344	47	8.30812	0.375548	-0.22969	2.26876	0.0470496	0.999039	-4.29384	CA	no_hit
DHX15	O43143	Pre-mRNA-splicing factor ATP-dependent RNA helicase DHX15 OS=Homo sapiens OX=9606 GN=DHX15 PE=1 SV=2	105971	33	8.38985	0.31032	-0.516191	2.26076	0.0476899	0.999039	-4.29589	CA	no_hit
ANXA3	P12429	Annexin A3 OS=Homo sapiens OX=9606 GN=ANXA3 PE=1 SV=3	44433.1	18	8.31686	0.318176	0.276899	2.25527	0.048134	0.999039	-4.2973	CA	no_hit
CSTF1	Q05048	Cleavage stimulation factor subunit 1 OS=Homo sapiens OX=9606 GN=CSTF1 PE=1 SV=1	54905	13	7.63399	-0.537039	-0.605948	-2.25302	0.048317	0.999039	-4.29788	CA	no_hit
ZC3H4	Q9UPT8	Zinc finger CCCH domain-containing protein 4 OS=Homo sapiens OX=9606 GN=ZC3H4 PE=1 SV=3	163308	10	7.16101	-0.686117	-1.89151	-2.25266	0.0483463	0.999039	-4.29797	CA	no_hit
TYMS	P04818	Thymidylate synthase OS=Homo sapiens OX=9606 GN=TYMS PE=1 SV=3	40541.4	10	7.64199	0.410242	0.29749	2.24424	0.0490383	0.999039	-4.30013	CA	no_hit
SNRPC	A0A0A0MRR7|P09234	U1 small nuclear ribonucleoprotein C OS=Homo sapiens OX=9606 GN=SNRPC PE=1 SV=1|U1 small nuclear ribonucleoprotein C OS=Homo sapiens OX=9606 GN=SNRPC PE=1 SV=1	22030.9|19986.0	3	7.28207	-1.01664	0.105374	-2.23804	0.0495543	0.999039	-4.30172	CA	no_hit
ABI1	A0A0A0MRT6|B6VEX4|Q8IZP0|Q8IZP0-10|Q8IZP0-12|Q8IZP0-2|Q8IZP0-3|Q8IZP0-4|Q8IZP0-5|Q8IZP0-6|Q8IZP0-7|Q8IZP0-8|Q8IZP0-9	Abl interactor 1 OS=Homo sapiens OX=9606 GN=ABI1 PE=1 SV=1|Abl interactor 1 OS=Homo sapiens OX=9606 GN=ABI1 PE=1 SV=1|Abl interactor 1 OS=Homo sapiens OX=9606 GN=ABI1 PE=1 SV=4|Isoform 10 of Abl interactor 1 OS=Homo sapiens OX=9606 GN=ABI1|Isoform 12 of Abl interactor 1 OS=Homo sapiens OX=9606 GN=ABI1|Isoform 2 of Abl interactor 1 OS=Homo sapiens OX=9606 GN=ABI1|Isoform 3 of Abl interactor 1 OS=H…	57631.8|49770.1|61549.1|48535.3|60438.5|54542.1|55848.0|55776.9|57702.8|58866.6|52859.8|49784.1|58937.6	6	7.30415	-0.563339	0.167471	-2.23029	0.0502066	0.999039	-4.30372	CA	no_hit
AFG1L	Q8WV93	AFG1-like ATPase OS=Homo sapiens OX=9606 GN=AFG1L PE=1 SV=2	65171.8	4	7.30053	0.266089	0.304554	2.22968	0.0502586	0.999039	-4.30387	CA	no_hit
KNSTRN	Q9Y448|Q9Y448-2|V9GY01	Small kinetochore-associated protein OS=Homo sapiens OX=9606 GN=KNSTRN PE=1 SV=2|Isoform 2 of Small kinetochore-associated protein OS=Homo sapiens OX=9606 GN=KNSTRN|Chromosome 15 open reading frame 23, isoform CRA_d OS=Homo sapiens OX=9606 GN=KNSTRN PE=1 SV=1|Small kinetochore-associated protein OS=Homo sapiens OX=9606 GN=KNSTRN PE=1 SV=2|Chromosome 15 open reading frame 23, isoform CRA_d OS=Homo…	44219.1|39389.4|34989.5	2	6.41528	-0.884915	0.421814	-2.22896	0.050319	0.999039	-4.30406	CA	no_hit
EDC3	Q96F86	Enhancer of mRNA-decapping protein 3 OS=Homo sapiens OX=9606 GN=EDC3 PE=1 SV=1	64997.2	8	7.12678	-0.364268	-0.21057	-2.22756	0.0504382	0.999039	-4.30442	CA	no_hit
AHNAK	Q09666	Neuroblast differentiation-associated protein AHNAK OS=Homo sapiens OX=9606 GN=AHNAK PE=1 SV=2	880792	235	8.89102	-0.429757	-0.0640447	-2.22184	0.0509273	0.999039	-4.30589	CA	no_hit
CYP4F11	Q9HBI6	Cytochrome P450 4F11 OS=Homo sapiens OX=9606 GN=CYP4F11 PE=1 SV=3	68757.6	8	7.26746	0.571166	0.0251863	2.22065	0.0510291	0.999039	-4.3062	CA	no_hit
IARS1	P41252	Isoleucine--tRNA ligase, cytoplasmic OS=Homo sapiens OX=9606 GN=IARS1 PE=1 SV=2	170967	44	8.36014	0.30001	-0.196989	2.2175	0.0513008	0.999039	-4.30701	CA	no_hit
IDE	A0A3B3ISG5|P14735	Insulin-degrading enzyme OS=Homo sapiens OX=9606 GN=IDE PE=1 SV=1|Insulin-degrading enzyme OS=Homo sapiens OX=9606 GN=IDE PE=1 SV=4	142394.0|142116.0	37	8.09443	0.48906	0.186017	2.21471	0.0515429	0.999039	-4.30773	CA	no_hit
USP32	K7EQL6|Q8NFA0	Ubiquitin carboxyl-terminal hydrolase 32 OS=Homo sapiens OX=9606 GN=USP32 PE=1 SV=1|Ubiquitin carboxyl-terminal hydrolase 32 OS=Homo sapiens OX=9606 GN=USP32 PE=1 SV=1|Ubiquitin carboxyl-terminal hydrolase 32 OS=Homo sapiens OX=9606 GN=USP32 PE=1 SV=1	166966.0|211504.0	4	6.35626	0.331349	-0.0863801	2.20982	0.0519698	0.999039	-4.30899	CA	no_hit
ARV1	A0A0A0MRI7|H7C484|Q9H2C2	Protein ARV1 OS=Homo sapiens OX=9606 GN=ARV1 PE=1 SV=1|Protein ARV1 (Fragment) OS=Homo sapiens OX=9606 GN=ARV1 PE=1 SV=1|Protein ARV1 OS=Homo sapiens OX=9606 GN=ARV1 PE=1 SV=1	31089.6|36829.9|37078.0	2	7.208	0.323859	0.00137571	2.20964	0.0519849	0.999039	-4.30903	CA	no_hit
NRBF2	Q96F24|Q96F24-2	Nuclear receptor-binding factor 2 OS=Homo sapiens OX=9606 GN=NRBF2 PE=1 SV=1|Nuclear receptor-binding factor 2 OS=Homo sapiens OX=9606 GN=NRBF2 PE=1 SV=1|Isoform 2 of Nuclear receptor-binding factor 2 OS=Homo sapiens OX=9606 GN=NRBF2	40742.3|34048.9	4	6.68762	-0.756726	-0.456551	-2.20917	0.0520268	0.999039	-4.30916	CA	no_hit
BIRC6	A0A3B3IUB9|Q9NR09	Baculoviral IAP repeat-containing protein 6 (Fragment) OS=Homo sapiens OX=9606 GN=BIRC6 PE=1 SV=1|Baculoviral IAP repeat-containing protein 6 OS=Homo sapiens OX=9606 GN=BIRC6 PE=1 SV=2|Baculoviral IAP repeat-containing protein 6 OS=Homo sapiens OX=9606 GN=BIRC6 PE=1 SV=2	475532.0|604943.0	52	7.51495	0.489628	-0.00751649	2.2085	0.052085	0.999039	-4.30933	CA	no_hit
ABLIM1	A0A3B3IS55|O14639|O14639-2	Actin-binding LIM protein 1 OS=Homo sapiens OX=9606 GN=ABLIM1 PE=1 SV=1|Actin-binding LIM protein 1 OS=Homo sapiens OX=9606 GN=ABLIM1 PE=1 SV=3|Isoform 2 of Actin-binding LIM protein 1 OS=Homo sapiens OX=9606 GN=ABLIM1	112403.0|105332.0|96962.9	15	7.50688	0.780294	-0.827439	2.20481	0.05241	0.999039	-4.31028	CA	no_hit
PSMD5	Q16401|Q16401-2	26S proteasome non-ATPase regulatory subunit 5 OS=Homo sapiens OX=9606 GN=PSMD5 PE=1 SV=3|26S proteasome non-ATPase regulatory subunit 5 OS=Homo sapiens OX=9606 GN=PSMD5 PE=1 SV=3|Isoform 2 of 26S proteasome non-ATPase regulatory subunit 5 OS=Homo sapiens OX=9606 GN=PSMD5	62947.9|57154.6	20	8.24771	0.355662	0.405437	2.20427	0.0524579	0.999039	-4.31042	CA	no_hit
PDCD2L	Q9BRP1	Programmed cell death protein 2-like OS=Homo sapiens OX=9606 GN=PDCD2L PE=1 SV=1	44258.2	4	7.28933	-0.612597	0.0904459	-2.20087	0.052759	0.999039	-4.3113	CA	no_hit
RUFY1	Q96T51	RUN and FYVE domain-containing protein 1 OS=Homo sapiens OX=9606 GN=RUFY1 PE=1 SV=2	97886.3	16	7.56947	0.40317	0.133486	2.19491	0.053291	0.999039	-4.31284	CA	no_hit
PMVK	Q15126	Phosphomevalonate kinase OS=Homo sapiens OX=9606 GN=PMVK PE=1 SV=3	24585.9	11	7.71066	0.284914	0.330837	2.19328	0.0534374	0.999039	-4.31326	CA	no_hit
TRMT1	Q9NXH9|Q9NXH9-2	tRNA (guanine(26)-N(2))-dimethyltransferase OS=Homo sapiens OX=9606 GN=TRMT1 PE=1 SV=1|Isoform 2 of tRNA (guanine(26)-N(2))-dimethyltransferase OS=Homo sapiens OX=9606 GN=TRMT1	80991.0|77342.1	9	6.73886	0.284102	0.290259	2.19252	0.0535054	0.999039	-4.31345	CA	no_hit
ARL6	Q9H0F7|Q9H0F7-2|A0A0J9YXT0	ADP-ribosylation factor-like protein 6 OS=Homo sapiens OX=9606 GN=ARL6 PE=1 SV=1|Isoform 2 of ADP-ribosylation factor-like protein 6 OS=Homo sapiens OX=9606 GN=ARL6|ADP-ribosylation factor-like protein 6 (Fragment) OS=Homo sapiens OX=9606 GN=ARL6 PE=1 SV=1|ADP-ribosylation factor-like protein 6 OS=Homo sapiens OX=9606 GN=ARL6 PE=1 SV=1|Isoform 2 of ADP-ribosylation factor-like protein 6 OS=Homo s…	26426.7|27650.3|20800.2	4	6.83061	0.337056	0.331884	2.18851	0.0538677	0.999039	-4.31449	CA	no_hit
PREB	Q9HCU5	Prolactin regulatory element-binding protein OS=Homo sapiens OX=9606 GN=PREB PE=1 SV=2	51485.6	9	7.50096	0.458467	0.24172	2.17986	0.0546579	0.999039	-4.31672	CA	no_hit
PHLDA1	Q8WV24|R4GND3	Pleckstrin homology-like domain family A member 1 OS=Homo sapiens OX=9606 GN=PHLDA1 PE=1 SV=4|Pleckstrin homology-like domain family A member 1 OS=Homo sapiens OX=9606 GN=PHLDA1 PE=1 SV=1	50977.0|35090.6	3	6.78632	-0.67364	-0.527874	-2.17681	0.0549387	0.999039	-4.31751	CA	no_hit
EPM2AIP1	Q7L775	EPM2A-interacting protein 1 OS=Homo sapiens OX=9606 GN=EPM2AIP1 PE=1 SV=1	78861.7	11	7.14419	0.329964	0.0678672	2.17307	0.0552851	0.999039	-4.31848	CA	no_hit
KIF7	Q2M1P5	Kinesin-like protein KIF7 OS=Homo sapiens OX=9606 GN=KIF7 PE=1 SV=2	169051	3	8.09849	0.322117	-0.0388813	2.17113	0.0554657	0.999039	-4.31898	CA	no_hit
LGALSL	Q3ZCW2	Galectin-related protein OS=Homo sapiens OX=9606 GN=LGALSL PE=1 SV=2	21331.2	4	6.68426	0.662361	0.589594	2.16905	0.0556601	0.999039	-4.31952	CA	no_hit
RAB11FIP1	Q6WKZ4|Q6WKZ4-3	Rab11 family-interacting protein 1 OS=Homo sapiens OX=9606 GN=RAB11FIP1 PE=1 SV=3|Rab11 family-interacting protein 1 OS=Homo sapiens OX=9606 GN=RAB11FIP1 PE=1 SV=3|Isoform 2 of Rab11 family-interacting protein 1 OS=Homo sapiens OX=9606 GN=RAB11FIP1	166077.0|91130.3	14	7.24619	-0.267855	0.0705788	-2.16838	0.0557226	0.999039	-4.31969	CA	no_hit
VPS13A	Q96RL7|Q96RL7-2|Q96RL7-3|Q96RL7-4	Vacuolar protein sorting-associated protein 13A OS=Homo sapiens OX=9606 GN=VPS13A PE=1 SV=2|Isoform 2 of Vacuolar protein sorting-associated protein 13A OS=Homo sapiens OX=9606 GN=VPS13A|Isoform 3 of Vacuolar protein sorting-associated protein 13A OS=Homo sapiens OX=9606 GN=VPS13A|Isoform 4 of Vacuolar protein sorting-associated protein 13A OS=Homo sapiens OX=9606 GN=VPS13A|Vacuolar protein sorti…	437924.0|425762.0|432485.0|422535.0	12	6.72102	0.637997	0.16328	2.1652	0.0560214	0.999039	-4.32052	CA	no_hit
GNB1L	Q9BYB4|Q9BYB4-2	Guanine nucleotide-binding protein subunit beta-like protein 1 OS=Homo sapiens OX=9606 GN=GNB1L PE=1 SV=2|Isoform 2 of Guanine nucleotide-binding protein subunit beta-like protein 1 OS=Homo sapiens OX=9606 GN=GNB1L|Guanine nucleotide-binding protein subunit beta-like protein 1 OS=Homo sapiens OX=9606 GN=GNB1L PE=1 SV=2	39321.4|25334.0	4	6.66756	0.288951	0.106223	2.16262	0.0562649	0.999039	-4.32119	CA	no_hit
C18orf32	Q8TCD1	UPF0729 protein C18orf32 OS=Homo sapiens OX=9606 GN=C18orf32 PE=3 SV=1	12181	3	7.50863	0.285638	0.237461	2.16004	0.0565094	0.999039	-4.32185	CA	no_hit
DPY30	Q9C005	Protein dpy-30 homolog OS=Homo sapiens OX=9606 GN=DPY30 PE=1 SV=1	13372.3	3	7.34923	-1.27483	0.3886	-2.15056	0.0574159	0.999039	-4.32431	CA	no_hit
MED15	Q96RN5|Q96RN5-2|Q96RN5-3	Mediator of RNA polymerase II transcription subunit 15 OS=Homo sapiens OX=9606 GN=MED15 PE=1 SV=2|Isoform 2 of Mediator of RNA polymerase II transcription subunit 15 OS=Homo sapiens OX=9606 GN=MED15|Isoform 3 of Mediator of RNA polymerase II transcription subunit 15 OS=Homo sapiens OX=9606 GN=MED15	96281.4|92111.2|85462.0	6	6.85743	-1.15154	-0.433716	-2.14628	0.0578298	0.999039	-4.32542	CA	no_hit
ARMC10	Q8N2F6|Q8N2F6-3	Armadillo repeat-containing protein 10 OS=Homo sapiens OX=9606 GN=ARMC10 PE=1 SV=1|Isoform 3 of Armadillo repeat-containing protein 10 OS=Homo sapiens OX=9606 GN=ARMC10	43030.3|36212.8	7	7.08872	0.297664	0.221238	2.14568	0.0578879	0.999039	-4.32557	CA	no_hit
RIOK1	Q9BRS2	Serine/threonine-protein kinase RIO1 OS=Homo sapiens OX=9606 GN=RIOK1 PE=1 SV=2	83223.6	8	6.96476	-0.321778	-0.236006	-2.13956	0.0584855	0.999039	-4.32716	CA	no_hit
DHRS1	Q96LJ7	Dehydrogenase/reductase SDR family member 1 OS=Homo sapiens OX=9606 GN=DHRS1 PE=1 SV=1	38108	7	7.17734	0.37961	0.461296	2.13642	0.0587937	0.999039	-4.32797	CA	no_hit
MYH10	P35580-2|P35580-4|P35580-5	Isoform 2 of Myosin-10 OS=Homo sapiens OX=9606 GN=MYH10|Isoform 4 of Myosin-10 OS=Homo sapiens OX=9606 GN=MYH10|Isoform 2 of Myosin-10 OS=Homo sapiens OX=9606 GN=MYH10|Isoform 5 of Myosin-10 OS=Homo sapiens OX=9606 GN=MYH10	291839.0|293587.0|291091.0	66	8.36297	0.421935	-0.376574	2.12492	0.0599388	0.999039	-4.33096	CA	no_hit
BAG3	O95817	BAG family molecular chaperone regulator 3 OS=Homo sapiens OX=9606 GN=BAG3 PE=1 SV=3	70245.7	22	7.83474	-0.819926	-0.0192638	-2.12368	0.0600628	0.999039	-4.33128	CA	no_hit
IRS1	P35568	Insulin receptor substrate 1 OS=Homo sapiens OX=9606 GN=IRS1 PE=1 SV=1	145179	3	6.45012	-0.319868	-0.208666	-2.11902	0.060534	0.999039	-4.33249	CA	no_hit
KDM5C	P41229|P41229-2|P41229-3|P41229-5	Lysine-specific demethylase 5C OS=Homo sapiens OX=9606 GN=KDM5C PE=1 SV=2|Isoform 2 of Lysine-specific demethylase 5C OS=Homo sapiens OX=9606 GN=KDM5C|Isoform 3 of Lysine-specific demethylase 5C OS=Homo sapiens OX=9606 GN=KDM5C|Isoform 5 of Lysine-specific demethylase 5C OS=Homo sapiens OX=9606 GN=KDM5C|Lysine-specific demethylase 5C OS=Homo sapiens OX=9606 GN=KDM5C PE=1 SV=2|Isoform 2 of Lysine-…	202321.0|201676.0|195644.0|202193.0	8	6.54563	0.356984	-0.0170702	2.11383	0.0610624	0.999039	-4.33384	CA	no_hit
CAT	P04040	Catalase OS=Homo sapiens OX=9606 GN=CAT PE=1 SV=3	69073.1	21	8.21795	0.268618	0.62628	2.1123	0.0612185	0.999039	-4.33424	CA	no_hit
PSMD11	O00231	26S proteasome non-ATPase regulatory subunit 11 OS=Homo sapiens OX=9606 GN=PSMD11 PE=1 SV=3	58366.4	23	8.61472	0.32058	0.416783	2.11131	0.0613203	0.999039	-4.3345	CA	no_hit
TTLL12	Q14166	Tubulin--tyrosine ligase-like protein 12 OS=Homo sapiens OX=9606 GN=TTLL12 PE=1 SV=2	82151.1	15	7.53714	0.385021	0.127216	2.11058	0.0613954	0.999039	-4.33469	CA	no_hit
NIPSNAP3A	Q9UFN0	Protein NipSnap homolog 3A OS=Homo sapiens OX=9606 GN=NIPSNAP3A PE=1 SV=2	33429.9	9	7.79957	0.302112	0.384099	2.10517	0.0619539	0.999039	-4.33609	CA	no_hit
FDFT1	P37268	Squalene synthase OS=Homo sapiens OX=9606 GN=FDFT1 PE=1 SV=1	55289.9	13	7.58023	0.306635	-0.00858832	2.10426	0.0620486	0.999039	-4.33633	CA	no_hit
HMGB2	P26583	High mobility group protein B2 OS=Homo sapiens OX=9606 GN=HMGB2 PE=1 SV=2	36358.1	5	7.83186	0.648695	0.29663	2.09974	0.0625197	0.999039	-4.33751	CA	no_hit
SPCS2	A0A087WUC6|E9PI68|E9PRB9|Q15005	Signal peptidase complex subunit 2 OS=Homo sapiens OX=9606 GN=SPCS2 PE=1 SV=1|Signal peptidase complex subunit 2 OS=Homo sapiens OX=9606 GN=SPCS2 PE=1 SV=1|Signal peptidase complex subunit 2 OS=Homo sapiens OX=9606 GN=SPCS2 PE=1 SV=1|Signal peptidase complex subunit 2 OS=Homo sapiens OX=9606 GN=SPCS2 PE=1 SV=3|Signal peptidase complex subunit 2 OS=Homo sapiens OX=9606 GN=SPCS2 PE=1 SV=1|Signal pe…	32051.4|35766.5|13198.3|31964.4	11	8.25656	0.283133	0.246959	2.0981	0.0626914	0.999039	-4.33793	CA	no_hit
TXLNA	P40222	Alpha-taxilin OS=Homo sapiens OX=9606 GN=TXLNA PE=1 SV=3	78622.6	17	7.57028	-0.625759	0.113102	-2.09793	0.0627088	0.999039	-4.33798	CA	no_hit
GLCE	H0YNP1|O94923	D-glucuronyl C5-epimerase OS=Homo sapiens OX=9606 GN=GLCE PE=1 SV=1|D-glucuronyl C5-epimerase OS=Homo sapiens OX=9606 GN=GLCE PE=1 SV=3	76403.1|85000.7	6	6.72637	0.964833	0.0559481	2.0972	0.0627852	0.999039	-4.33817	CA	no_hit
ARPC1A	Q92747	Actin-related protein 2/3 complex subunit 1A OS=Homo sapiens OX=9606 GN=ARPC1A PE=2 SV=2	49413.9	2	6.74615	0.340924	0.273792	2.09317	0.06321	0.999039	-4.33922	CA	no_hit
TSN	E9PGT1	Translin OS=Homo sapiens OX=9606 GN=TSN PE=1 SV=1	29929.4	12	7.95832	0.288985	0.126231	2.09259	0.0632716	0.999039	-4.33937	CA	no_hit
MVD	H3BP35|P53602	Diphosphomevalonate decarboxylase (Fragment) OS=Homo sapiens OX=9606 GN=MVD PE=1 SV=1|Diphosphomevalonate decarboxylase OS=Homo sapiens OX=9606 GN=MVD PE=1 SV=1|Diphosphomevalonate decarboxylase OS=Homo sapiens OX=9606 GN=MVD PE=1 SV=1	33409.8|48453.4	4	7.12653	0.554773	0.479537	2.09138	0.0633992	0.999039	-4.33968	CA	no_hit
MTMR6	Q9Y217	Myotubularin-related protein 6 OS=Homo sapiens OX=9606 GN=MTMR6 PE=1 SV=3	86162.6	10	6.98515	0.420345	0.0794273	2.09132	0.0634058	0.999039	-4.3397	CA	no_hit
ELMOD2	D6RBS5|Q8IZ81	ELMO domain-containing protein 2 (Fragment) OS=Homo sapiens OX=9606 GN=ELMOD2 PE=1 SV=8|ELMO domain-containing protein 2 OS=Homo sapiens OX=9606 GN=ELMOD2 PE=1 SV=1|ELMO domain-containing protein 2 OS=Homo sapiens OX=9606 GN=ELMOD2 PE=1 SV=1	25781.0|43132.2	5	7.06194	0.258711	0.0557696	2.08227	0.0643723	0.999039	-4.34206	CA	no_hit
SERPINB5	P36952	Serpin B5 OS=Homo sapiens OX=9606 GN=SERPINB5 PE=1 SV=2	54089.4	8	7.10009	2.77864	0.554609	2.07482	0.0651773	0.999039	-4.34399	CA	no_hit
CCT2	P78371	T-complex protein 1 subunit beta OS=Homo sapiens OX=9606 GN=CCT2 PE=1 SV=4	69049.9	31	8.98122	0.410749	0.157904	2.07452	0.06521	0.999039	-4.34407	CA	no_hit
SMARCD1	Q96GM5|Q96GM5-2	SWI/SNF-related matrix-associated actin-dependent regulator of chromatin subfamily D member 1 OS=Homo sapiens OX=9606 GN=SMARCD1 PE=1 SV=2|Isoform 2 of SWI/SNF-related matrix-associated actin-dependent regulator of chromatin subfamily D member 1 OS=Homo sapiens OX=9606 GN=SMARCD1	68215.6|62619.7	5	6.97013	-0.636977	-0.652162	-2.07021	0.0656811	0.999039	-4.3452	CA	no_hit
MICALL1	Q8N3F8	MICAL-like protein 1 OS=Homo sapiens OX=9606 GN=MICALL1 PE=1 SV=2	110780	8	7.32498	-0.260954	0.188274	-2.065	0.0662545	0.999039	-4.34655	CA	no_hit
RAB13	P51153	Ras-related protein Rab-13 OS=Homo sapiens OX=9606 GN=RAB13 PE=1 SV=1	29984.6	11	7.97272	0.333044	0.152825	2.05916	0.066903	0.999039	-4.34808	CA	no_hit
PRRC2B	Q5JSZ5	Protein PRRC2B OS=Homo sapiens OX=9606 GN=PRRC2B PE=1 SV=2	284722	14	6.9317	-0.415098	-0.838439	-2.05498	0.0673706	0.999039	-4.34917	CA	no_hit
PPL	K7EKI8|O60437	Periplakin OS=Homo sapiens OX=9606 GN=PPL PE=1 SV=1|Periplakin OS=Homo sapiens OX=9606 GN=PPL PE=1 SV=4	245700.0|245957.0	25	7.14058	1.4152	-0.969752	2.05289	0.0676063	0.999039	-4.34971	CA	no_hit
DNAJC3	Q13217	DnaJ homolog subfamily C member 3 OS=Homo sapiens OX=9606 GN=DNAJC3 PE=1 SV=1	73514.9	15	7.67377	0.261461	0.422654	2.05121	0.0677954	0.999039	-4.35015	CA	no_hit
EHD3	Q9NZN3	EH domain-containing protein 3 OS=Homo sapiens OX=9606 GN=EHD3 PE=1 SV=2	74290.9	4	6.37045	0.368186	0.124544	2.04978	0.0679573	0.999039	-4.35052	CA	no_hit
ATXN2L	Q8WWM7	Ataxin-2-like protein OS=Homo sapiens OX=9606 GN=ATXN2L PE=1 SV=2	126974	21	7.75037	-0.857934	-0.816106	-2.04923	0.0680196	0.999039	-4.35067	CA	no_hit
GNA11	P29992	Guanine nucleotide-binding protein subunit alpha-11 OS=Homo sapiens OX=9606 GN=GNA11 PE=1 SV=2	49682.6	9	7.60618	0.249444	0.0729661	2.04922	0.0680201	0.999039	-4.35067	CA	no_hit
CRYAB	E9PJL7|E9PRA8|E9PS12|P02511	Alpha-crystallin B chain (Fragment) OS=Homo sapiens OX=9606 GN=CRYAB PE=1 SV=8|Alpha-crystallin B chain OS=Homo sapiens OX=9606 GN=CRYAB PE=1 SV=1|Alpha-crystallin B chain (Fragment) OS=Homo sapiens OX=9606 GN=CRYAB PE=1 SV=1|Alpha-crystallin B chain OS=Homo sapiens OX=9606 GN=CRYAB PE=1 SV=2|Alpha-crystallin B chain (Fragment) OS=Homo sapiens OX=9606 GN=CRYAB PE=1 SV=8|Alpha-crystallin B chain O…	17164.0|19549.3|9484.81|23188.5	4	6.69107	0.797208	0.419903	2.04444	0.0685648	0.999039	-4.35192	CA	no_hit
RPL10A	P62906	60S ribosomal protein L10a OS=Homo sapiens OX=9606 GN=RPL10A PE=1 SV=2	34417	12	8.84863	0.596504	-4.54646	2.04272	0.0687614	0.999039	-4.35237	CA	no_hit
QDPR	P09417|P09417-2	Dihydropteridine reductase OS=Homo sapiens OX=9606 GN=QDPR PE=1 SV=2|Isoform 2 of Dihydropteridine reductase OS=Homo sapiens OX=9606 GN=QDPR|Dihydropteridine reductase OS=Homo sapiens OX=9606 GN=QDPR PE=1 SV=2	30260.0|26576.2	8	7.90452	0.533221	0.464688	2.04082	0.0689783	0.999039	-4.35286	CA	no_hit
CYP20A1	Q6UW02|E9PHG5	Cytochrome P450 20A1 OS=Homo sapiens OX=9606 GN=CYP20A1 PE=1 SV=1|Cytochrome P450 20A1 OS=Homo sapiens OX=9606 GN=CYP20A1 PE=1 SV=1|Cytochrome P450 20A1 OS=Homo sapiens OX=9606 GN=CYP20A1 PE=1 SV=1	61258.9|62331.4	8	7.25657	0.335312	0.0702771	2.03928	0.0691562	0.999039	-4.35326	CA	no_hit
TERF2IP	Q9NYB0	Telomeric repeat-binding factor 2-interacting protein 1 OS=Homo sapiens OX=9606 GN=TERF2IP PE=1 SV=1	52009.1	8	7.0015	-0.361982	-0.208334	-2.03855	0.0692401	0.999039	-4.35346	CA	no_hit
PSMB1	P20618	Proteasome subunit beta type-1 OS=Homo sapiens OX=9606 GN=PSMB1 PE=1 SV=2	30655.2	8	8.56772	0.381329	0.533067	2.0375	0.0693615	0.999039	-4.35373	CA	no_hit
SNRPD3	P62318|P62318-2	Small nuclear ribonucleoprotein Sm D3 OS=Homo sapiens OX=9606 GN=SNRPD3 PE=1 SV=1|Isoform 2 of Small nuclear ribonucleoprotein Sm D3 OS=Homo sapiens OX=9606 GN=SNRPD3	17063.4|16191.8	4	7.40445	-0.414434	-1.24402	-2.03576	0.0695626	0.999039	-4.35418	CA	no_hit
TST	Q16762	Thiosulfate sulfurtransferase OS=Homo sapiens OX=9606 GN=TST PE=1 SV=4	37894.8	14	8.29294	0.254587	0.138829	2.03233	0.0699608	0.999039	-4.35508	CA	no_hit
GPAA1	O43292	Glycosylphosphatidylinositol anchor attachment 1 protein OS=Homo sapiens OX=9606 GN=GPAA1 PE=1 SV=3	71876.8	6	7.35797	0.344416	0.207245	2.0304	0.0701851	0.999039	-4.35558	CA	no_hit
AGAP3	Q96P47|Q96P47-2|Q96P47-4	Arf-GAP with GTPase, ANK repeat and PH domain-containing protein 3 OS=Homo sapiens OX=9606 GN=AGAP3 PE=1 SV=2|Isoform 2 of Arf-GAP with GTPase, ANK repeat and PH domain-containing protein 3 OS=Homo sapiens OX=9606 GN=AGAP3|Isoform 4 of Arf-GAP with GTPase, ANK repeat and PH domain-containing protein 3 OS=Homo sapiens OX=9606 GN=AGAP3	107458.0|107156.0|110420.0	4	6.74716	-0.403186	-0.281172	-2.02834	0.0704264	0.999039	-4.35612	CA	no_hit
NMNAT1	Q9HAN9	Nicotinamide/nicotinic acid mononucleotide adenylyltransferase 1 OS=Homo sapiens OX=9606 GN=NMNAT1 PE=1 SV=1	40050.1	7	6.84544	0.551807	-2.41091	2.02684	0.0706024	0.999039	-4.35651	CA	no_hit
BLMH	Q13867	Bleomycin hydrolase OS=Homo sapiens OX=9606 GN=BLMH PE=1 SV=1	63194.1	16	7.94893	0.616971	0.431138	2.02671	0.0706172	0.999039	-4.35655	CA	no_hit
COX15	Q7KZN9|Q7KZN9-2	Cytochrome c oxidase assembly protein COX15 homolog OS=Homo sapiens OX=9606 GN=COX15 PE=1 SV=1|Isoform 2 of Cytochrome c oxidase assembly protein COX15 homolog OS=Homo sapiens OX=9606 GN=COX15	50601.4|48408.2	6	7.41273	0.405381	0.0296853	2.02517	0.0707985	0.999039	-4.35695	CA	no_hit
POLR2I	K7EKS1|P36954	DNA-directed RNA polymerase II subunit RPB9 OS=Homo sapiens OX=9606 GN=POLR2I PE=1 SV=1|DNA-directed RNA polymerase II subunit RPB9 OS=Homo sapiens OX=9606 GN=POLR2I PE=1 SV=1	11797.7|16547.8	3	6.90517	-1.13065	0.218337	-2.02508	0.0708086	0.999039	-4.35697	CA	no_hit
YOD1	Q5VVQ6|Q5VVQ6-2	Ubiquitin thioesterase OTU1 OS=Homo sapiens OX=9606 GN=YOD1 PE=1 SV=1|Isoform 2 of Ubiquitin thioesterase OTU1 OS=Homo sapiens OX=9606 GN=YOD1	42157.7|36847.9	4	6.25657	0.763128	0.0122779	2.02403	0.070933	0.999039	-4.35725	CA	no_hit
SERPINB8	P50452	Serpin B8 OS=Homo sapiens OX=9606 GN=SERPINB8 PE=1 SV=2	52739.8	6	7.03695	0.512527	0.347647	2.02307	0.0710458	0.999039	-4.3575	CA	no_hit
APOB	P04114	Apolipoprotein B-100 OS=Homo sapiens OX=9606 GN=APOB PE=1 SV=2	624949	8	6.92805	0.319824	0.138631	2.02104	0.0712861	0.999039	-4.35803	CA	no_hit
DSC1	Q08554-2	Isoform 1B of Desmocollin-1 OS=Homo sapiens OX=9606 GN=DSC1	109823	12	7.21791	2.7511	0.365308	2.01513	0.0719896	0.999039	-4.35957	CA	no_hit
SFN	P31947|P31947-2	14-3-3 protein sigma OS=Homo sapiens OX=9606 GN=SFN PE=1 SV=1|14-3-3 protein sigma OS=Homo sapiens OX=9606 GN=SFN PE=1 SV=1|Isoform 2 of 14-3-3 protein sigma OS=Homo sapiens OX=9606 GN=SFN	33042.3|28941.1	13	8.34131	0.490667	0.929542	2.01489	0.0720186	0.999039	-4.35963	CA	no_hit
EVPL	K7EKI0|Q92817	Envoplakin OS=Homo sapiens OX=9606 GN=EVPL PE=1 SV=1|Envoplakin OS=Homo sapiens OX=9606 GN=EVPL PE=1 SV=3	277341.0|275059.0	18	6.79551	1.33895	-0.975416	2.01402	0.0721219	0.999039	-4.35986	CA	no_hit
PSMB5	P28074	Proteasome subunit beta type-5 OS=Homo sapiens OX=9606 GN=PSMB5 PE=1 SV=3	31066.9	11	8.60925	0.385837	0.380826	2.01062	0.0725303	0.999039	-4.36075	CA	no_hit
KARS1	Q15046	Lysine--tRNA ligase OS=Homo sapiens OX=9606 GN=KARS1 PE=1 SV=3	83062.7	28	8.63885	0.274811	-0.0239454	2.01017	0.0725853	0.999039	-4.36087	CA	no_hit
ALDH1A3	P47895	Aldehyde dehydrogenase family 1 member A3 OS=Homo sapiens OX=9606 GN=ALDH1A3 PE=1 SV=2	69039.4	11	7.41397	0.334272	0.557638	2.00898	0.0727283	0.999039	-4.36118	CA	no_hit
SGPP1	Q9BX95	Sphingosine-1-phosphate phosphatase 1 OS=Homo sapiens OX=9606 GN=SGPP1 PE=1 SV=2	53049.2	5	7.13846	-0.225516	0.306426	-2.00889	0.0727395	0.999039	-4.3612	CA	no_hit
SMARCE1	A0A2R8Y855|B4DGM3|Q969G3|Q969G3-2|J3QKS7	SWI/SNF-related matrix-associated actin-dependent regulator of chromatin subfamily E member 1 OS=Homo sapiens OX=9606 GN=SMARCE1 PE=1 SV=1|SWI/SNF-related matrix-associated actin-dependent regulator of chromatin subfamily E member 1 OS=Homo sapiens OX=9606 GN=SMARCE1 PE=1 SV=1|SWI/SNF-related matrix-associated actin-dependent regulator of chromatin subfamily E member 1 OS=Homo sapiens OX=9606 GN=…	50175.4|53621.7|55803.8|50746.8|40033.2	11	7.34635	-0.917702	-0.223397	-2.00345	0.0733991	0.999039	-4.36262	CA	no_hit
WTAP	Q15007	Pre-mRNA-splicing regulator WTAP OS=Homo sapiens OX=9606 GN=WTAP PE=1 SV=2	51992.9	8	6.98998	-0.765085	-0.403649	-2.00344	0.0734003	0.999039	-4.36263	CA	no_hit
SEPTIN9	Q9UHD8	Septin-9 OS=Homo sapiens OX=9606 GN=SEPTIN9 PE=1 SV=2	78726.8	31	8.2907	-0.329089	0.130157	-2.00287	0.0734695	0.999039	-4.36277	CA	no_hit
MIA2	G3V599|Q96PC5|Q96PC5-11	Melanoma inhibitory activity protein 2 OS=Homo sapiens OX=9606 GN=MIA2 PE=1 SV=1|Melanoma inhibitory activity protein 2 OS=Homo sapiens OX=9606 GN=MIA2 PE=1 SV=4|Melanoma inhibitory activity protein 2 OS=Homo sapiens OX=9606 GN=MIA2 PE=1 SV=1|Melanoma inhibitory activity protein 2 OS=Homo sapiens OX=9606 GN=MIA2 PE=1 SV=4|Isoform 10 of Melanoma inhibitory activity protein 2 OS=Homo sapiens OX=960…	180544.0|189568.0|98446.0	21	7.23477	0.355628	0.109988	2.00246	0.0735202	0.999039	-4.36288	CA	no_hit
AHNAK2	Q8IVF2-3|Q8IVF2	Isoform 3 of Protein AHNAK2 OS=Homo sapiens OX=9606 GN=AHNAK2|Protein AHNAK2 OS=Homo sapiens OX=9606 GN=AHNAK2 PE=1 SV=2|Isoform 3 of Protein AHNAK2 OS=Homo sapiens OX=9606 GN=AHNAK2	787906.0|799299.0	118	8.50749	-0.479781	-0.164271	-1.99889	0.0739565	0.999039	-4.36382	CA	no_hit
ACSL1	P33121|P33121-3|P33121-2	Long-chain-fatty-acid--CoA ligase 1 OS=Homo sapiens OX=9606 GN=ACSL1 PE=1 SV=1|Isoform 3 of Long-chain-fatty-acid--CoA ligase 1 OS=Homo sapiens OX=9606 GN=ACSL1|Long-chain-fatty-acid--CoA ligase 1 OS=Homo sapiens OX=9606 GN=ACSL1 PE=1 SV=1|Isoform 2 of Long-chain-fatty-acid--CoA ligase 1 OS=Homo sapiens OX=9606 GN=ACSL1|Isoform 3 of Long-chain-fatty-acid--CoA ligase 1 OS=Homo sapiens OX=9606 GN=A…	92304.4|92819.9|90871.6	15	7.42521	0.345432	0.277957	1.99817	0.0740445	0.999039	-4.364	CA	no_hit
KIF20B	Q96Q89-3	Isoform 3 of Kinesin-like protein KIF20B OS=Homo sapiens OX=9606 GN=KIF20B	270652	3	6.40317	0.895175	-0.508053	1.99708	0.0741784	0.999039	-4.36429	CA	no_hit
DTD2	Q96FN9	D-aminoacyl-tRNA deacylase 2 OS=Homo sapiens OX=9606 GN=DTD2 PE=1 SV=1	21918.8	2	6.78123	-0.363936	0.294782	-1.99618	0.0742897	0.999039	-4.36452	CA	no_hit
CSTF2T	Q9H0L4	Cleavage stimulation factor subunit 2 tau variant OS=Homo sapiens OX=9606 GN=CSTF2T PE=1 SV=1	69490.9	3	7.08209	-0.666848	-0.0468468	-1.99435	0.0745158	0.999039	-4.365	CA	no_hit
ANXA8L1	Q5VT79	Annexin A8-like protein 1 OS=Homo sapiens OX=9606 GN=ANXA8L1 PE=2 SV=2	45297.4	5	7.00173	0.571643	0.206322	1.99346	0.0746258	0.999039	-4.36524	CA	no_hit
MTMR9	Q96QG7	Myotubularin-related protein 9 OS=Homo sapiens OX=9606 GN=MTMR9 PE=1 SV=1	72071.8	6	6.88749	0.333217	0.0261819	1.99326	0.0746496	0.999039	-4.36529	CA	no_hit
PSMD6	Q15008	26S proteasome non-ATPase regulatory subunit 6 OS=Homo sapiens OX=9606 GN=PSMD6 PE=1 SV=1	53696.8	25	8.72748	0.365852	0.206984	1.99043	0.0750014	0.999039	-4.36603	CA	no_hit
CSTA	C9J0E4|P01040	Cystatin-A OS=Homo sapiens OX=9606 GN=CSTA PE=1 SV=1|Cystatin-A OS=Homo sapiens OX=9606 GN=CSTA PE=1 SV=1	9211.23|14650.2	3	7.00706	2.03472	-0.11662	1.98942	0.0751262	0.999039	-4.36629	CA	no_hit
PTPRF	P10586|P10586-2	Receptor-type tyrosine-protein phosphatase F OS=Homo sapiens OX=9606 GN=PTPRF PE=1 SV=2|Isoform 2 of Receptor-type tyrosine-protein phosphatase F OS=Homo sapiens OX=9606 GN=PTPRF	237366.0|236174.0	6	6.63551	0.244479	0.24308	1.98882	0.075201	0.999039	-4.36645	CA	no_hit
NBAS	A2RRP1	Neuroblastoma-amplified sequence OS=Homo sapiens OX=9606 GN=NBAS PE=1 SV=2	314297	26	7.36855	0.3168	0.0994699	1.98533	0.0756369	0.999039	-4.36736	CA	no_hit
EML1	A0A3B3IU69|F8W717|O00423|O00423-3	Echinoderm microtubule-associated protein-like 1 OS=Homo sapiens OX=9606 GN=EML1 PE=1 SV=1|Echinoderm microtubule-associated protein-like 1 OS=Homo sapiens OX=9606 GN=EML1 PE=1 SV=1|Echinoderm microtubule-associated protein-like 1 OS=Homo sapiens OX=9606 GN=EML1 PE=1 SV=3|Isoform 3 of Echinoderm microtubule-associated protein-like 1 OS=Homo sapiens OX=9606 GN=EML1	109287.0|104233.0|105072.0|107556.0	14	7.1486	0.316493	0.133456	1.98472	0.0757135	0.999039	-4.36752	CA	no_hit
GGCT	O75223	Gamma-glutamylcyclotransferase OS=Homo sapiens OX=9606 GN=GGCT PE=1 SV=1	26089.7	7	7.8575	0.609088	0.523632	1.97755	0.0766186	0.999039	-4.3694	CA	no_hit
SNX7	Q9UNH6|Q9UNH6-3	Sorting nexin-7 OS=Homo sapiens OX=9606 GN=SNX7 PE=1 SV=1|Isoform 3 of Sorting nexin-7 OS=Homo sapiens OX=9606 GN=SNX7	54684.9|61302.0	6	7.08951	0.301258	0.018102	1.97722	0.0766597	0.999039	-4.36948	CA	no_hit
COMMD4	H3BM91|Q9H0A8	COMM domain-containing protein 4 (Fragment) OS=Homo sapiens OX=9606 GN=COMMD4 PE=1 SV=1|COMM domain-containing protein 4 OS=Homo sapiens OX=9606 GN=COMMD4 PE=1 SV=1	26855.4|26047.1	6	7.55534	0.269367	0.474913	1.9767	0.0767263	0.999039	-4.36962	CA	no_hit
SCML2	Q9UQR0	Sex comb on midleg-like protein 2 OS=Homo sapiens OX=9606 GN=SCML2 PE=1 SV=1	95403	8	6.67056	0.885975	-0.312982	1.97277	0.0772263	0.999039	-4.37064	CA	no_hit
A2M	P01023	Alpha-2-macroglobulin OS=Homo sapiens OX=9606 GN=A2M PE=1 SV=3	191688	8	7.58195	0.660091	0.155695	1.97227	0.0772905	0.999039	-4.37078	CA	no_hit
SUPT5H	O00267-2|O00267	Isoform 2 of Transcription elongation factor SPT5 OS=Homo sapiens OX=9606 GN=SUPT5H|Transcription elongation factor SPT5 OS=Homo sapiens OX=9606 GN=SUPT5H PE=1 SV=1	139684.0|140185.0	34	7.94719	-0.732208	-2.36082	-1.97097	0.0774571	0.999039	-4.37112	CA	no_hit
HDHD3	Q9BSH5	Haloacid dehalogenase-like hydrolase domain-containing protein 3 OS=Homo sapiens OX=9606 GN=HDHD3 PE=1 SV=1	29731.5	8	7.47729	0.247373	0.386339	1.97076	0.0774835	0.999039	-4.37117	CA	no_hit
BUB3	O43684|O43684-2	Mitotic checkpoint protein BUB3 OS=Homo sapiens OX=9606 GN=BUB3 PE=1 SV=1|Isoform 2 of Mitotic checkpoint protein BUB3 OS=Homo sapiens OX=9606 GN=BUB3	42758.9|42501.8	14	8.06719	-0.376326	-0.34326	-1.97016	0.0775613	0.999039	-4.37133	CA	no_hit
DNPH1	H0Y8X4|O43598|O43598-2	2'-deoxynucleoside 5'-phosphate N-hydrolase 1 (Fragment) OS=Homo sapiens OX=9606 GN=DNPH1 PE=1 SV=1|2'-deoxynucleoside 5'-phosphate N-hydrolase 1 OS=Homo sapiens OX=9606 GN=DNPH1 PE=1 SV=1|Isoform 2 of 2'-deoxynucleoside 5'-phosphate N-hydrolase 1 OS=Homo sapiens OX=9606 GN=DNPH1|2'-deoxynucleoside 5'-phosphate N-hydrolase 1 (Fragment) OS=Homo sapiens OX=9606 GN=DNPH1 PE=1 SV=1|2'-deoxynucleoside…	26384.2|19514.8|16899.7	3	7.43665	-0.462352	0.427793	-1.97011	0.0775675	0.999039	-4.37134	CA	no_hit
MAN2C1	Q9NTJ4|Q9NTJ4-2|Q9NTJ4-4|Q9NTJ4-3	Alpha-mannosidase 2C1 OS=Homo sapiens OX=9606 GN=MAN2C1 PE=1 SV=1|Isoform 2 of Alpha-mannosidase 2C1 OS=Homo sapiens OX=9606 GN=MAN2C1|Isoform 4 of Alpha-mannosidase 2C1 OS=Homo sapiens OX=9606 GN=MAN2C1|Alpha-mannosidase 2C1 OS=Homo sapiens OX=9606 GN=MAN2C1 PE=1 SV=1|Isoform 2 of Alpha-mannosidase 2C1 OS=Homo sapiens OX=9606 GN=MAN2C1|Isoform 3 of Alpha-mannosidase 2C1 OS=Homo sapiens OX=9606 G…	125781.0|123408.0|127607.0|113502.0	6	7.26525	0.311666	0.275198	1.96666	0.0780113	0.999039	-4.37224	CA	no_hit
MGA	Q8IWI9|Q8IWI9-3	MAX gene-associated protein OS=Homo sapiens OX=9606 GN=MGA PE=1 SV=4|Isoform 2 of MAX gene-associated protein OS=Homo sapiens OX=9606 GN=MGA	412041.0|389230.0	6	6.22495	-0.47194	-1.3933	-1.96252	0.0785464	0.999039	-4.37333	CA	no_hit
APEH	C9JIF9|P13798	Acylamino-acid-releasing enzyme OS=Homo sapiens OX=9606 GN=APEH PE=1 SV=1|Acylamino-acid-releasing enzyme OS=Homo sapiens OX=9606 GN=APEH PE=1 SV=4	91223.0|90659.8	16	7.91484	0.254853	0.314949	1.96219	0.0785902	0.999039	-4.37341	CA	no_hit
MED7	O43513	Mediator of RNA polymerase II transcription subunit 7 OS=Homo sapiens OX=9606 GN=MED7 PE=1 SV=1	31410.5	3	6.18171	-0.564019	-0.457376	-1.96171	0.0786515	0.999039	-4.37354	CA	no_hit
IFT74	Q96LB3	Intraflagellar transport protein 74 homolog OS=Homo sapiens OX=9606 GN=IFT74 PE=1 SV=1	87258.4	12	6.91864	-0.536612	0.470941	-1.96043	0.0788182	0.999039	-4.37387	CA	no_hit
DHCR24	A0A0A0MTI1|Q15392|Q15392-2	Delta(24)-sterol reductase OS=Homo sapiens OX=9606 GN=DHCR24 PE=1 SV=1|Delta(24)-sterol reductase OS=Homo sapiens OX=9606 GN=DHCR24 PE=1 SV=2|Isoform 2 of Delta(24)-sterol reductase OS=Homo sapiens OX=9606 GN=DHCR24	71635.4|70233.7|63973.6	9	7.73864	0.293342	0.0954685	1.95996	0.0788793	0.999039	-4.374	CA	no_hit
MEMO1	Q9Y316|Q9Y316-3	Protein MEMO1 OS=Homo sapiens OX=9606 GN=MEMO1 PE=1 SV=1|Isoform 3 of Protein MEMO1 OS=Homo sapiens OX=9606 GN=MEMO1	38065.3|38929.9	8	7.76577	0.272954	0.385518	1.95988	0.0788901	0.999039	-4.37402	CA	no_hit
UGDH	E7ETF4|O60701	UDP-glucose 6-dehydrogenase (Fragment) OS=Homo sapiens OX=9606 GN=UGDH PE=1 SV=1|UDP-glucose 6-dehydrogenase OS=Homo sapiens OX=9606 GN=UGDH PE=1 SV=1|UDP-glucose 6-dehydrogenase OS=Homo sapiens OX=9606 GN=UGDH PE=1 SV=1	20523.0|66625.0	31	9.15654	0.304251	0.519901	1.958	0.079136	0.999039	-4.37451	CA	no_hit
PRRC2A	P48634	Protein PRRC2A OS=Homo sapiens OX=9606 GN=PRRC2A PE=1 SV=3	258688	16	7.42893	-0.510755	-0.816737	-1.95621	0.0793701	0.999039	-4.37498	CA	no_hit
CERS2	Q96G23	Ceramide synthase 2 OS=Homo sapiens OX=9606 GN=CERS2 PE=1 SV=1	50741.3	5	7.50387	0.358859	0.390969	1.95378	0.0796893	0.999039	-4.37561	CA	no_hit
KIFAP3	Q92845|Q92845-2|Q92845-3|Q92845-4	Kinesin-associated protein 3 OS=Homo sapiens OX=9606 GN=KIFAP3 PE=1 SV=2|Isoform 2 of Kinesin-associated protein 3 OS=Homo sapiens OX=9606 GN=KIFAP3|Isoform 3 of Kinesin-associated protein 3 OS=Homo sapiens OX=9606 GN=KIFAP3|Isoform 4 of Kinesin-associated protein 3 OS=Homo sapiens OX=9606 GN=KIFAP3	110501.0|104012.0|104810.0|98042.2	3	6.48668	0.256407	-0.077256	1.95197	0.0799277	0.999039	-4.37609	CA	no_hit
ASMTL	O95671|O95671-2|O95671-3	Probable bifunctional dTTP/UTP pyrophosphatase/methyltransferase protein OS=Homo sapiens OX=9606 GN=ASMTL PE=1 SV=3|Isoform 2 of Probable bifunctional dTTP/UTP pyrophosphatase/methyltransferase protein OS=Homo sapiens OX=9606 GN=ASMTL|Probable bifunctional dTTP/UTP pyrophosphatase/methyltransferase protein OS=Homo sapiens OX=9606 GN=ASMTL PE=1 SV=3|Isoform 2 of Probable bifunctional dTTP/UTP pyro…	80201.5|78234.3|71909.7	6	6.59677	0.503365	0.323398	1.95182	0.0799479	0.999039	-4.37613	CA	no_hit
FRK	P42685	Tyrosine-protein kinase FRK OS=Homo sapiens OX=9606 GN=FRK PE=1 SV=1	67191.2	5	6.78951	0.218449	0.261476	1.95082	0.0800802	0.999039	-4.37639	CA	no_hit
G3BP1	Q13283	Ras GTPase-activating protein-binding protein 1 OS=Homo sapiens OX=9606 GN=G3BP1 PE=1 SV=1	57969	14	8.23294	-0.339404	-0.635853	-1.94488	0.0808692	0.999039	-4.37794	CA	no_hit
RPL9	P32969|A0A2R8Y5Y7	60S ribosomal protein L9 OS=Homo sapiens OX=9606 GN=RPL9 PE=1 SV=1|60S ribosomal protein L9 OS=Homo sapiens OX=9606 GN=RPL9 PE=1 SV=1|60S ribosomal protein L9 OS=Homo sapiens OX=9606 GN=RPL9 PE=1 SV=1	27135.4|30441.0	10	8.78303	1.10358	-3.36186	1.94313	0.0811023	0.999039	-4.3784	CA	no_hit
PPP2CA	P67775	Serine/threonine-protein phosphatase 2A catalytic subunit alpha isoform OS=Homo sapiens OX=9606 GN=PPP2CA PE=1 SV=1	39792.1	2	7.96293	0.277829	0.532774	1.94054	0.0814502	0.999039	-4.37908	CA	no_hit
SAMD4B	M0QZ22|Q5PRF9|A0A087WZT0	Protein Smaug homolog 2 OS=Homo sapiens OX=9606 GN=SAMD4B PE=1 SV=1|Protein Smaug homolog 2 OS=Homo sapiens OX=9606 GN=SAMD4B PE=1 SV=1|Protein Smaug homolog 2 OS=Homo sapiens OX=9606 GN=SAMD4B PE=1 SV=1|Protein Smaug homolog 2 OS=Homo sapiens OX=9606 GN=SAMD4B PE=1 SV=1|Protein Smaug homolog 2 OS=Homo sapiens OX=9606 GN=SAMD4B PE=1 SV=1	84277.1|84714.4|81342.9	3	6.98161	0.517295	-0.136215	1.93896	0.0816621	0.999039	-4.37949	CA	no_hit
CPPED1	Q9BRF8	Serine/threonine-protein phosphatase CPPED1 OS=Homo sapiens OX=9606 GN=CPPED1 PE=1 SV=3	41952.1	7	7.83047	0.246695	0.310809	1.93843	0.0817332	0.999039	-4.37963	CA	no_hit
PITPNA	Q00169	Phosphatidylinositol transfer protein alpha isoform OS=Homo sapiens OX=9606 GN=PITPNA PE=1 SV=2	40531.9	12	7.8128	0.264766	0.248525	1.93617	0.0820391	0.999039	-4.38022	CA	no_hit
UFSP2	D6RA67|Q9NUQ7	Ufm1-specific protease 2 (Fragment) OS=Homo sapiens OX=9606 GN=UFSP2 PE=1 SV=1|Ufm1-specific protease 2 OS=Homo sapiens OX=9606 GN=UFSP2 PE=1 SV=3	17577.8|62144.1	8	7.42678	0.302736	-0.094681	1.93604	0.0820557	0.999039	-4.38025	CA	no_hit
CAB39	Q9Y376	Calcium-binding protein 39 OS=Homo sapiens OX=9606 GN=CAB39 PE=1 SV=1	49749.4	12	7.67784	0.286951	-0.0433118	1.93579	0.0820902	0.999039	-4.38032	CA	no_hit
FXR2	P51116	Fragile X mental retardation syndrome-related protein 2 OS=Homo sapiens OX=9606 GN=FXR2 PE=1 SV=2	82733.7	16	7.47431	0.67416	-1.56598	1.93175	0.0826386	0.999039	-4.38138	CA	no_hit
NFKB1	D6RF93|P19838|P19838-2	Nuclear factor NF-kappa-B p105 subunit (Fragment) OS=Homo sapiens OX=9606 GN=NFKB1 PE=1 SV=1|Nuclear factor NF-kappa-B p105 subunit OS=Homo sapiens OX=9606 GN=NFKB1 PE=1 SV=2|Isoform 2 of Nuclear factor NF-kappa-B p105 subunit OS=Homo sapiens OX=9606 GN=NFKB1|Nuclear factor NF-kappa-B p105 subunit OS=Homo sapiens OX=9606 GN=NFKB1 PE=1 SV=2|Isoform 2 of Nuclear factor NF-kappa-B p105 subunit OS=Ho…	25758.6|123561.0|123632.0	13	7.36206	-0.248438	0.197627	-1.92508	0.0835518	0.999039	-4.38312	CA	no_hit
UBAP2	Q5T6F2	Ubiquitin-associated protein 2 OS=Homo sapiens OX=9606 GN=UBAP2 PE=1 SV=1	131608	14	7.47077	-0.507251	-0.263707	-1.92155	0.0840379	0.999039	-4.38405	CA	no_hit
TMEM199	Q8N511|J3KS81	Transmembrane protein 199 OS=Homo sapiens OX=9606 GN=TMEM199 PE=1 SV=1|Transmembrane protein 199 OS=Homo sapiens OX=9606 GN=TMEM199 PE=1 SV=1|Transmembrane protein 199 OS=Homo sapiens OX=9606 GN=TMEM199 PE=1 SV=1	26575.9|16995.7	4	6.97391	-0.368528	0.411	-1.91694	0.0846778	0.999039	-4.38525	CA	no_hit
PAIP1	Q9H074	Polyadenylate-binding protein-interacting protein 1 OS=Homo sapiens OX=9606 GN=PAIP1 PE=1 SV=1	59727.2	8	7.74846	-0.633842	0.172094	-1.9148	0.0849766	0.999039	-4.38581	CA	no_hit
WIZ	B9EGQ5|M0QXA7|O95785-3|O95785-4|O95785	Protein Wiz OS=Homo sapiens OX=9606 GN=WIZ PE=1 SV=1|Protein Wiz OS=Homo sapiens OX=9606 GN=WIZ PE=1 SV=1|Isoform 3 of Protein Wiz OS=Homo sapiens OX=9606 GN=WIZ|Isoform 4 of Protein Wiz OS=Homo sapiens OX=9606 GN=WIZ|Protein Wiz OS=Homo sapiens OX=9606 GN=WIZ PE=1 SV=1|Protein Wiz OS=Homo sapiens OX=9606 GN=WIZ PE=1 SV=2|Isoform 3 of Protein Wiz OS=Homo sapiens OX=9606 GN=WIZ	107442.0|123901.0|123600.0|107743.0|203945.0	10	6.88863	-0.508115	-1.05949	-1.91453	0.085015	0.999039	-4.38589	CA	no_hit
TLK2	Q86UE8|Q86UE8-2|Q86UE8-3|J3KRK0	Serine/threonine-protein kinase tousled-like 2 OS=Homo sapiens OX=9606 GN=TLK2 PE=1 SV=2|Isoform 2 of Serine/threonine-protein kinase tousled-like 2 OS=Homo sapiens OX=9606 GN=TLK2|Isoform 3 of Serine/threonine-protein kinase tousled-like 2 OS=Homo sapiens OX=9606 GN=TLK2|Serine/threonine-protein kinase tousled-like 2 (Fragment) OS=Homo sapiens OX=9606 GN=TLK2 PE=1 SV=1|Serine/threonine-protein k…	107266.0|104745.0|101652.0|86148.6	2	6.67926	-0.308314	-0.0741537	-1.91357	0.0851488	0.999039	-4.38614	CA	no_hit
ATP2B4	P23634|P23634-6|P23634-7|P23634-8|P23634-2|P23634-3|P23634-4|P23634-5	Plasma membrane calcium-transporting ATPase 4 OS=Homo sapiens OX=9606 GN=ATP2B4 PE=1 SV=2|Isoform XB of Plasma membrane calcium-transporting ATPase 4 OS=Homo sapiens OX=9606 GN=ATP2B4|Isoform ZB of Plasma membrane calcium-transporting ATPase 4 OS=Homo sapiens OX=9606 GN=ATP2B4|Isoform ZD of Plasma membrane calcium-transporting ATPase 4 OS=Homo sapiens OX=9606 GN=ATP2B4|Plasma membrane calcium-tra…	164888.0|160292.0|158044.0|162639.0|154798.0|152549.0|150323.0|148075.0	5	6.75079	0.295536	0.260413	1.91339	0.0851743	0.999039	-4.38618	CA	no_hit
HARS1	P12081	Histidine--tRNA ligase, cytoplasmic OS=Homo sapiens OX=9606 GN=HARS1 PE=1 SV=2	71025.3	22	8.1751	0.288342	0.302181	1.91229	0.0853289	0.999039	-4.38647	CA	no_hit
PPIB	P23284	Peptidyl-prolyl cis-trans isomerase B OS=Homo sapiens OX=9606 GN=PPIB PE=1 SV=2	31693.9	16	9.26483	0.352707	-0.0770898	1.91017	0.0856261	0.999039	-4.38703	CA	no_hit
PSMD12	O00232	26S proteasome non-ATPase regulatory subunit 12 OS=Homo sapiens OX=9606 GN=PSMD12 PE=1 SV=3	66350.6	26	8.555	0.305068	0.271551	1.90905	0.0857844	0.999039	-4.38732	CA	no_hit
UBE4A	Q14139|Q14139-2	Ubiquitin conjugation factor E4 A OS=Homo sapiens OX=9606 GN=UBE4A PE=1 SV=2|Isoform 2 of Ubiquitin conjugation factor E4 A OS=Homo sapiens OX=9606 GN=UBE4A	139080.0|140345.0	12	7.23914	0.40557	0.184459	1.90395	0.0865054	0.999039	-4.38865	CA	no_hit
IGF2BP1	Q9NZI8	Insulin-like growth factor 2 mRNA-binding protein 1 OS=Homo sapiens OX=9606 GN=IGF2BP1 PE=1 SV=2	78081	23	8.33483	0.653044	-3.1502	1.90199	0.0867856	0.999039	-4.38917	CA	no_hit
RAB3D	O95716	Ras-related protein Rab-3D OS=Homo sapiens OX=9606 GN=RAB3D PE=1 SV=1	28130.4	5	7.62813	0.331372	0.350009	1.89928	0.0871715	0.999039	-4.38987	CA	no_hit
ME3	E9PMB9|Q16798	Malic enzyme (Fragment) OS=Homo sapiens OX=9606 GN=ME3 PE=1 SV=8|NADP-dependent malic enzyme, mitochondrial OS=Homo sapiens OX=9606 GN=ME3 PE=2 SV=2	74598.2|77691.7	8	7.40104	0.321547	0.196975	1.89803	0.0873503	0.999039	-4.3902	CA	no_hit
LCN1	P31025	Lipocalin-1 OS=Homo sapiens OX=9606 GN=LCN1 PE=1 SV=1	23059.4	2	6.7827	3.2215	0.236224	1.89662	0.0875535	0.999039	-4.39057	CA	no_hit
MAP4	E7EVA0|F8W9U4|P27816-5	Microtubule-associated protein OS=Homo sapiens OX=9606 GN=MAP4 PE=1 SV=1|Microtubule-associated protein OS=Homo sapiens OX=9606 GN=MAP4 PE=1 SV=1|Isoform 5 of Microtubule-associated protein 4 OS=Homo sapiens OX=9606 GN=MAP4|Microtubule-associated protein OS=Homo sapiens OX=9606 GN=MAP4 PE=1 SV=1|Microtubule-associated protein OS=Homo sapiens OX=9606 GN=MAP4 PE=1 SV=1	317427.0|112996.0|110734.0	58	8.28574	-0.401377	-0.176657	-1.89493	0.0877972	0.999039	-4.39101	CA	no_hit
CLTA	F8WF69|P09496|P09496-2|P09496-3|P09496-4	Clathrin light chain OS=Homo sapiens OX=9606 GN=CLTA PE=1 SV=1|Clathrin light chain A OS=Homo sapiens OX=9606 GN=CLTA PE=1 SV=1|Isoform Non-brain of Clathrin light chain A OS=Homo sapiens OX=9606 GN=CLTA|Isoform 3 of Clathrin light chain A OS=Homo sapiens OX=9606 GN=CLTA|Isoform 4 of Clathrin light chain A OS=Homo sapiens OX=9606 GN=CLTA	31070.8|30824.6|27050.7|29367.9|28438.3	9	8.33294	-0.738434	0.380789	-1.89485	0.0878089	0.999039	-4.39104	CA	no_hit
MEF2D	Q14814|Q14814-4	Myocyte-specific enhancer factor 2D OS=Homo sapiens OX=9606 GN=MEF2D PE=1 SV=1|Isoform MEF2DA0 of Myocyte-specific enhancer factor 2D OS=Homo sapiens OX=9606 GN=MEF2D	61911.4|61088.0	4	6.73149	-1.07855	-0.643567	-1.89438	0.0878757	0.999039	-4.39116	CA	no_hit
RING1	Q06587|Q06587-2	E3 ubiquitin-protein ligase RING1 OS=Homo sapiens OX=9606 GN=RING1 PE=1 SV=2|Isoform 2 of E3 ubiquitin-protein ligase RING1 OS=Homo sapiens OX=9606 GN=RING1	48144.5|44558.7	2	6.87946	-0.430249	-0.483257	-1.89341	0.0880159	0.999039	-4.39141	CA	no_hit
IMPA1	P29218|P29218-3	Inositol monophosphatase 1 OS=Homo sapiens OX=9606 GN=IMPA1 PE=1 SV=1|Inositol monophosphatase 1 OS=Homo sapiens OX=9606 GN=IMPA1 PE=1 SV=1|Isoform 3 of Inositol monophosphatase 1 OS=Homo sapiens OX=9606 GN=IMPA1	35435.6|44066.7	10	7.78045	0.276626	0.311237	1.89217	0.0881953	0.999039	-4.39174	CA	no_hit
PPIP5K1	B7WPL9|F8W9A8|Q6PFW1|Q6PFW1-2|Q6PFW1-3|Q6PFW1-4|Q6PFW1-5|Q6PFW1-6|Q6PFW1-7	Inositol hexakisphosphate and diphosphoinositol-pentakisphosphate kinase OS=Homo sapiens OX=9606 GN=PPIP5K1 PE=1 SV=1|Inositol hexakisphosphate and diphosphoinositol-pentakisphosphate kinase OS=Homo sapiens OX=9606 GN=PPIP5K1 PE=1 SV=1|Inositol hexakisphosphate and diphosphoinositol-pentakisphosphate kinase 1 OS=Homo sapiens OX=9606 GN=PPIP5K1 PE=1 SV=1|Isoform 2 of Inositol hexakisphosphate and …	181035.0|178701.0|181627.0|181092.0|178058.0|177945.0|153820.0|108126.0|176850.0	3	5.99903	0.592844	0.0656433	1.89153	0.0882876	0.999039	-4.3919	CA	no_hit
RAPH1	C9J164|C9K0J5|Q70E73|Q70E73-2|Q70E73-3|Q70E73-4|Q70E73-5|Q70E73-6|Q70E73-7|Q70E73-8|Q70E73-9	Ras-associated and pleckstrin homology domains-containing protein 1 OS=Homo sapiens OX=9606 GN=RAPH1 PE=1 SV=1|Ras association (RalGDS/AF-6) and pleckstrin homology domains 1, isoform CRA_b OS=Homo sapiens OX=9606 GN=RAPH1 PE=1 SV=1|Ras-associated and pleckstrin homology domains-containing protein 1 OS=Homo sapiens OX=9606 GN=RAPH1 PE=1 SV=3|Isoform RMO1 of Ras-associated and pleckstrin homology …	82193.5|170067.0|162873.0|82471.6|86213.6|85923.6|81966.4|89665.6|85708.4|85418.4|89160.3	7	6.90848	-0.223716	-0.0108277	-1.89035	0.0884593	0.999039	-4.39221	CA	no_hit
MUC5B	Q9HC84	Mucin-5B OS=Homo sapiens OX=9606 GN=MUC5B PE=1 SV=3	641396	20	7.24351	-0.709637	-0.998228	-1.88939	0.0885976	0.999039	-4.39246	CA	no_hit
CROCC	Q5TZA2	Rootletin OS=Homo sapiens OX=9606 GN=CROCC PE=1 SV=1	253732	3	6.48796	0.310223	0.0783129	1.889	0.0886543	0.999039	-4.39256	CA	no_hit
ARF6	P62330	ADP-ribosylation factor 6 OS=Homo sapiens OX=9606 GN=ARF6 PE=1 SV=2	24138.2	4	7.28191	0.315836	0.022703	1.88828	0.0887592	0.999039	-4.39275	CA	no_hit
NDUFB1	O75438	NADH dehydrogenase [ubiquinone] 1 beta subcomplex subunit 1 OS=Homo sapiens OX=9606 GN=NDUFB1 PE=1 SV=1	8230.49	3	7.65979	0.312817	0.471917	1.88423	0.0893511	0.999039	-4.39381	CA	no_hit
MAGI3	Q5TCQ9|Q5TCQ9-1|Q5TCQ9-2|Q5TCQ9-3	Membrane-associated guanylate kinase, WW and PDZ domain-containing protein 3 OS=Homo sapiens OX=9606 GN=MAGI3 PE=1 SV=3|Isoform 4 of Membrane-associated guanylate kinase, WW and PDZ domain-containing protein 3 OS=Homo sapiens OX=9606 GN=MAGI3|Isoform 2 of Membrane-associated guanylate kinase, WW and PDZ domain-containing protein 3 OS=Homo sapiens OX=9606 GN=MAGI3|Isoform 3 of Membrane-associated …	203307.0|205965.0|150142.0|147485.0	5	6.51546	-0.269253	0.0820305	-1.88401	0.0893829	0.999039	-4.39387	CA	no_hit
SAR1B	Q9Y6B6	GTP-binding protein SAR1b OS=Homo sapiens OX=9606 GN=SAR1B PE=1 SV=1	25855.8	4	7.58164	0.233585	0.0525056	1.8831	0.0895167	0.999039	-4.39411	CA	no_hit
RNF220	Q5VTB9|Q5VTB9-3	E3 ubiquitin-protein ligase RNF220 OS=Homo sapiens OX=9606 GN=RNF220 PE=1 SV=1|Isoform 2 of E3 ubiquitin-protein ligase RNF220 OS=Homo sapiens OX=9606 GN=RNF220	73182.3|46788.7	3	6.76666	-0.328562	0.433841	-1.8815	0.0897517	0.999039	-4.39453	CA	no_hit
NSDHL	Q15738	Sterol-4-alpha-carboxylate 3-dehydrogenase, decarboxylating OS=Homo sapiens OX=9606 GN=NSDHL PE=1 SV=2	48242.8	18	8.35937	0.269936	0.143265	1.87933	0.0900708	0.999039	-4.39509	CA	no_hit
DCAF1	Q9Y4B6|Q9Y4B6-2	DDB1- and CUL4-associated factor 1 OS=Homo sapiens OX=9606 GN=DCAF1 PE=1 SV=3|Isoform 2 of DDB1- and CUL4-associated factor 1 OS=Homo sapiens OX=9606 GN=DCAF1	191354.0|191283.0	10	6.75713	0.310713	-0.567481	1.87671	0.090459	0.999039	-4.39578	CA	no_hit
PRR11	Q96HE9	Proline-rich protein 11 OS=Homo sapiens OX=9606 GN=PRR11 PE=1 SV=1	51220	3	6.2275	-0.677383	-1.96978	-1.87317	0.0909846	0.999039	-4.39671	CA	no_hit
CBX4	O00257	E3 SUMO-protein ligase CBX4 OS=Homo sapiens OX=9606 GN=CBX4 PE=1 SV=3	77794.6	4	6.55899	-0.659869	-2.2229	-1.86802	0.0917551	0.999039	-4.39805	CA	no_hit
MORF4L2	Q15014	Mortality factor 4-like protein 2 OS=Homo sapiens OX=9606 GN=MORF4L2 PE=1 SV=1	41471	4	6.82181	-0.431036	-0.826581	-1.86716	0.0918833	0.999039	-4.39828	CA	no_hit
HNRNPA1	F8W6I7|P09651|P09651-2|P09651-3	Heterogeneous nuclear ribonucleoprotein A1 OS=Homo sapiens OX=9606 GN=HNRNPA1 PE=1 SV=2|Heterogeneous nuclear ribonucleoprotein A1 OS=Homo sapiens OX=9606 GN=HNRNPA1 PE=1 SV=5|Isoform A1-A of Heterogeneous nuclear ribonucleoprotein A1 OS=Homo sapiens OX=9606 GN=HNRNPA1|Isoform 2 of Heterogeneous nuclear ribonucleoprotein A1 OS=Homo sapiens OX=9606 GN=HNRNPA1|Heterogeneous nuclear ribonucleoprotei…	38724.6|44312.8|39765.0|34958.0	12	8.32775	0.47421	-2.31319	1.86655	0.091975	0.999039	-4.39844	CA	no_hit
WDR45	A0A0U1RR06|C9JYH8|G8JLI5|H0Y329|Q9Y484|Q9Y484-3|A0A0U1RQR1|C9J471	WD repeat domain phosphoinositide-interacting protein 4 OS=Homo sapiens OX=9606 GN=WDR45 PE=1 SV=1|WD repeat domain 45, isoform CRA_e OS=Homo sapiens OX=9606 GN=WDR45 PE=1 SV=1|WD repeat domain phosphoinositide-interacting protein 4 OS=Homo sapiens OX=9606 GN=WDR45 PE=1 SV=2|WD repeat domain phosphoinositide-interacting protein 4 (Fragment) OS=Homo sapiens OX=9606 GN=WDR45 PE=1 SV=1|WD repeat dom…	45475.9|43061.6|42600.3|38222.3|47028.6|47099.6|36713.8|34036.2	4	6.71758	0.319974	0.263234	1.86638	0.0920007	0.999039	-4.39848	CA	no_hit
KIF3B	O15066	Kinesin-like protein KIF3B OS=Homo sapiens OX=9606 GN=KIF3B PE=1 SV=1	107090	7	6.955	0.317417	0.188973	1.86566	0.092109	0.999039	-4.39867	CA	no_hit
POLD2	A0A087WWF6|P49005|F8W8R3	DNA polymerase delta subunit 2 OS=Homo sapiens OX=9606 GN=POLD2 PE=1 SV=1|DNA polymerase delta subunit 2 OS=Homo sapiens OX=9606 GN=POLD2 PE=1 SV=1|DNA polymerase delta subunit 2 OS=Homo sapiens OX=9606 GN=POLD2 PE=1 SV=1|DNA polymerase delta subunit 2 OS=Homo sapiens OX=9606 GN=POLD2 PE=1 SV=1|DNA polymerase delta subunit 2 OS=Homo sapiens OX=9606 GN=POLD2 PE=1 SV=1	60820.8|57055.7|55018.7	11	7.17765	-0.282127	0.197586	-1.86215	0.0926397	0.999039	-4.39959	CA	no_hit
FOXK1	P85037	Forkhead box protein K1 OS=Homo sapiens OX=9606 GN=FOXK1 PE=1 SV=1	81951	10	7.33068	-0.370006	0.0925668	-1.86091	0.0928274	0.999039	-4.39991	CA	no_hit
CXorf56	Q9H5V9|Q9H5V9-2|Q9H5V9-3	UPF0428 protein CXorf56 OS=Homo sapiens OX=9606 GN=CXorf56 PE=1 SV=1|Isoform 2 of UPF0428 protein CXorf56 OS=Homo sapiens OX=9606 GN=CXorf56|Isoform 3 of UPF0428 protein CXorf56 OS=Homo sapiens OX=9606 GN=CXorf56	33916.5|27136.1|31260.0	3	6.77723	-0.397973	-0.0360514	-1.8581	0.0932549	0.999039	-4.40065	CA	no_hit
CNOT3	H7C3F5|O75175	CCR4-NOT transcription complex subunit 3 OS=Homo sapiens OX=9606 GN=CNOT3 PE=1 SV=2|CCR4-NOT transcription complex subunit 3 OS=Homo sapiens OX=9606 GN=CNOT3 PE=1 SV=1	63013.6|97564.3	13	7.57231	-0.268356	-0.031504	-1.85519	0.0936994	0.999039	-4.40141	CA	no_hit
MLKL	Q8NB16	Mixed lineage kinase domain-like protein OS=Homo sapiens OX=9606 GN=MLKL PE=1 SV=1	68095.7	11	7.43081	0.222957	0.124199	1.85423	0.0938475	0.999039	-4.40166	CA	no_hit
CSNK2B	P67870|Q5SRQ3|Q5SRQ6	Casein kinase II subunit beta OS=Homo sapiens OX=9606 GN=CSNK2B PE=1 SV=1|Casein kinase II subunit beta OS=Homo sapiens OX=9606 GN=CSNK2B PE=1 SV=1|Casein kinase II subunit beta OS=Homo sapiens OX=9606 GN=CSNK2B PE=1 SV=2|Casein kinase II subunit beta OS=Homo sapiens OX=9606 GN=CSNK2B PE=1 SV=1|Casein kinase II subunit beta OS=Homo sapiens OX=9606 GN=CSNK2B PE=1 SV=2	28006.0|28937.2|30957.6	5	7.75382	-0.355331	0.127796	-1.85096	0.0943487	0.999039	-4.40251	CA	no_hit
TSPYL5	Q86VY4	Testis-specific Y-encoded-like protein 5 OS=Homo sapiens OX=9606 GN=TSPYL5 PE=1 SV=2	52645	4	6.65179	-0.329337	-1.47117	-1.84871	0.0946963	0.999039	-4.4031	CA	no_hit
FAF2	Q96CS3	FAS-associated factor 2 OS=Homo sapiens OX=9606 GN=FAF2 PE=1 SV=2	58104.2	16	8.19642	0.23291	-0.0286507	1.84839	0.0947457	0.999039	-4.40318	CA	no_hit
TIPRL	O75663	TIP41-like protein OS=Homo sapiens OX=9606 GN=TIPRL PE=1 SV=2	37431.7	13	7.90143	0.242672	0.336106	1.84686	0.094983	0.999039	-4.40359	CA	no_hit
OAT	P04181|P04181-2	Ornithine aminotransferase, mitochondrial OS=Homo sapiens OX=9606 GN=OAT PE=1 SV=1|Isoform 2 of Ornithine aminotransferase, mitochondrial OS=Homo sapiens OX=9606 GN=OAT	57364.1|38288.8	16	8.25635	0.211837	0.0902373	1.84486	0.095294	0.999039	-4.40411	CA	no_hit
NUSAP1	Q9BXS6-4|Q9BXS6-6|Q9BXS6|Q9BXS6-2|Q9BXS6-3|Q9BXS6-5|Q9BXS6-7	Isoform 4 of Nucleolar and spindle-associated protein 1 OS=Homo sapiens OX=9606 GN=NUSAP1|Isoform 6 of Nucleolar and spindle-associated protein 1 OS=Homo sapiens OX=9606 GN=NUSAP1|Nucleolar and spindle-associated protein 1 OS=Homo sapiens OX=9606 GN=NUSAP1 PE=1 SV=1|Isoform 2 of Nucleolar and spindle-associated protein 1 OS=Homo sapiens OX=9606 GN=NUSAP1|Isoform 3 of Nucleolar and spindle-associa…	63835.0|63963.1|66020.1|65892.1|65764.0|55882.2	8	7.09597	-0.290244	-0.587684	-1.84414	0.0954047	0.999039	-4.4043	CA	no_hit
PGAM1	P18669	Phosphoglycerate mutase 1 OS=Homo sapiens OX=9606 GN=PGAM1 PE=1 SV=2	34375.6	15	8.93572	0.261957	0.30489	1.84394	0.0954369	0.999039	-4.40435	CA	no_hit
ACAD9	Q9H845	Complex I assembly factor ACAD9, mitochondrial OS=Homo sapiens OX=9606 GN=ACAD9 PE=1 SV=1	81208	20	7.65871	0.258643	0.138071	1.83982	0.0960797	0.999039	-4.40542	CA	no_hit
EIF4A3	P38919	Eukaryotic initiation factor 4A-III OS=Homo sapiens OX=9606 GN=EIF4A3 PE=1 SV=4	54123.1	18	8.41462	0.342358	-0.604082	1.8396	0.0961143	0.999039	-4.40548	CA	no_hit
TNFAIP2	Q03169	Tumor necrosis factor alpha-induced protein 2 OS=Homo sapiens OX=9606 GN=TNFAIP2 PE=2 SV=2	83054.1	19	7.57484	0.254957	0.0625679	1.83848	0.0962905	0.999039	-4.40578	CA	no_hit
TRMT11	K7ENP1|Q5JY02|Q7Z4G4|Q7Z4G4-2|Q7Z4G4-3|V9GXZ6	tRNA (guanine(10)-N2)-methyltransferase homolog OS=Homo sapiens OX=9606 GN=TRMT11 PE=1 SV=1|tRNA (guanine(10)-N2)-methyltransferase homolog (Fragment) OS=Homo sapiens OX=9606 GN=TRMT11 PE=1 SV=1|tRNA (guanine(10)-N2)-methyltransferase homolog OS=Homo sapiens OX=9606 GN=TRMT11 PE=1 SV=1|Isoform 2 of tRNA (guanine(10)-N2)-methyltransferase homolog OS=Homo sapiens OX=9606 GN=TRMT11|Isoform 3 of tRNA…	32083.4|20063.0|64737.7|63498.0|34934.6|11443.9	6	7.01305	0.247586	0.270036	1.8375	0.0964435	0.999039	-4.40603	CA	no_hit
RBM33	H0Y3K4|Q96EV2	RNA-binding protein 33 (Fragment) OS=Homo sapiens OX=9606 GN=RBM33 PE=1 SV=1|RNA-binding protein 33 OS=Homo sapiens OX=9606 GN=RBM33 PE=1 SV=3	111588.0|144793.0	5	7.10689	-0.520798	-0.485199	-1.83574	0.0967207	0.999039	-4.40649	CA	no_hit
RNF2	Q99496|X6RFN3	E3 ubiquitin-protein ligase RING2 OS=Homo sapiens OX=9606 GN=RNF2 PE=1 SV=1|E3 ubiquitin-protein ligase RING2 (Fragment) OS=Homo sapiens OX=9606 GN=RNF2 PE=1 SV=2	45388.8|32279.6	3	6.34183	-0.509522	-0.987821	-1.82902	0.0977854	0.999039	-4.40825	CA	no_hit
MSN	P26038	Moesin OS=Homo sapiens OX=9606 GN=MSN PE=1 SV=3	86752.7	31	8.97056	0.449885	-0.00717648	1.82771	0.0979942	0.999039	-4.40859	CA	no_hit
NDUFB5	E7EWP0|H0Y886|O43674|O43674-2	NADH dehydrogenase [ubiquinone] 1 beta subcomplex subunit 5, mitochondrial OS=Homo sapiens OX=9606 GN=NDUFB5 PE=1 SV=1|NADH dehydrogenase [ubiquinone] 1 beta subcomplex subunit 5, mitochondrial (Fragment) OS=Homo sapiens OX=9606 GN=NDUFB5 PE=1 SV=1|NADH dehydrogenase [ubiquinone] 1 beta subcomplex subunit 5, mitochondrial OS=Homo sapiens OX=9606 GN=NDUFB5 PE=1 SV=1|Isoform 2 of NADH dehydrogenase…	22459.2|26572.5|24778.6|18090.7	5	8.0084	0.406089	0.26257	1.82636	0.0982106	0.999039	-4.40894	CA	no_hit
UROD	P06132|A0A1B0GVZ4	Uroporphyrinogen decarboxylase OS=Homo sapiens OX=9606 GN=UROD PE=1 SV=2|Uroporphyrinogen decarboxylase OS=Homo sapiens OX=9606 GN=UROD PE=1 SV=1|Uroporphyrinogen decarboxylase OS=Homo sapiens OX=9606 GN=UROD PE=1 SV=2	44753.4|38762.0	9	7.68597	0.319834	0.266383	1.8257	0.0983153	0.999039	-4.40911	CA	no_hit
RBM3	P98179	RNA-binding protein 3 OS=Homo sapiens OX=9606 GN=RBM3 PE=1 SV=1	18072.6	4	8.08638	-0.548106	-1.63207	-1.82313	0.098728	0.999039	-4.40979	CA	no_hit
VPS26B	Q4G0F5	Vacuolar protein sorting-associated protein 26B OS=Homo sapiens OX=9606 GN=VPS26B PE=1 SV=2	47457.8	8	7.12943	0.261922	0.140982	1.82176	0.0989484	0.999039	-4.41014	CA	no_hit
THYN1	Q9P016|Q9P016-2	Thymocyte nuclear protein 1 OS=Homo sapiens OX=9606 GN=THYN1 PE=1 SV=1|Isoform 2 of Thymocyte nuclear protein 1 OS=Homo sapiens OX=9606 GN=THYN1	33457.2|25359.8	3	7.04159	0.863273	0.463952	1.81797	0.0995604	0.999039	-4.41113	CA	no_hit
STAM	Q92783|Q92783-2	Signal transducing adapter molecule 1 OS=Homo sapiens OX=9606 GN=STAM PE=1 SV=3|Isoform 2 of Signal transducing adapter molecule 1 OS=Homo sapiens OX=9606 GN=STAM	68971.6|54772.8	6	7.12397	-0.410162	0.0915483	-1.81469	0.100093	0.999039	-4.41199	CA	no_hit
FN3KRP	Q9HA64	Ketosamine-3-kinase OS=Homo sapiens OX=9606 GN=FN3KRP PE=1 SV=2	39485.6	10	7.66624	0.289462	0.538493	1.81241	0.100464	0.999039	-4.41258	CA	no_hit
EML2	O95834-2|O95834-3	Isoform 2 of Echinoderm microtubule-associated protein-like 2 OS=Homo sapiens OX=9606 GN=EML2|Isoform 3 of Echinoderm microtubule-associated protein-like 2 OS=Homo sapiens OX=9606 GN=EML2	97595.6|103362.0	12	7.35895	0.251861	0.27138	1.81093	0.100706	0.999039	-4.41297	CA	no_hit
KHK	P50053-2|P50053	Isoform A of Ketohexokinase OS=Homo sapiens OX=9606 GN=KHK|Ketohexokinase OS=Homo sapiens OX=9606 GN=KHK PE=1 SV=2|Isoform A of Ketohexokinase OS=Homo sapiens OX=9606 GN=KHK	37367.8|37578.8	3	6.84821	0.217486	0.183223	1.80963	0.100919	0.999039	-4.41331	CA	no_hit
GNA13	Q14344|Q14344-2	Guanine nucleotide-binding protein subunit alpha-13 OS=Homo sapiens OX=9606 GN=GNA13 PE=1 SV=2|Guanine nucleotide-binding protein subunit alpha-13 OS=Homo sapiens OX=9606 GN=GNA13 PE=1 SV=2|Isoform 2 of Guanine nucleotide-binding protein subunit alpha-13 OS=Homo sapiens OX=9606 GN=GNA13	51969.0|38304.4	13	7.7655	0.239485	0.149827	1.80715	0.101327	0.999039	-4.41396	CA	no_hit
LSS	P48449|P48449-2|P48449-3	Lanosterol synthase OS=Homo sapiens OX=9606 GN=LSS PE=1 SV=1|Isoform 2 of Lanosterol synthase OS=Homo sapiens OX=9606 GN=LSS|Lanosterol synthase OS=Homo sapiens OX=9606 GN=LSS PE=1 SV=1|Isoform 3 of Lanosterol synthase OS=Homo sapiens OX=9606 GN=LSS	91145.1|80728.8|90035.6	11	7.35696	0.352977	0.18745	1.80703	0.101346	0.999039	-4.41399	CA	no_hit
SMARCD2	B9EGA3|J3KMX2|Q92925|Q92925-2|Q92925-3	SMARCD2 protein OS=Homo sapiens OX=9606 GN=SMARCD2 PE=1 SV=1|SWI/SNF-related matrix-associated actin-dependent regulator of chromatin subfamily D member 2 OS=Homo sapiens OX=9606 GN=SMARCD2 PE=1 SV=1|SWI/SNF-related matrix-associated actin-dependent regulator of chromatin subfamily D member 2 OS=Homo sapiens OX=9606 GN=SMARCD2 PE=1 SV=3|Isoform 2 of SWI/SNF-related matrix-associated actin-depende…	65176.3|61559.5|68237.9|66732.9|64919.3	7	6.86843	-0.517341	-0.296536	-1.80575	0.101557	0.999039	-4.41432	CA	no_hit
SUGP1	Q8IWZ8	SURP and G-patch domain-containing protein 1 OS=Homo sapiens OX=9606 GN=SUGP1 PE=1 SV=2	91096.1	9	6.99008	-0.402137	0.186205	-1.80525	0.101639	0.999039	-4.41445	CA	no_hit
TRA2A	Q13595|Q13595-3|Q13595-4	Transformer-2 protein homolog alpha OS=Homo sapiens OX=9606 GN=TRA2A PE=1 SV=1|Isoform 3 of Transformer-2 protein homolog alpha OS=Homo sapiens OX=9606 GN=TRA2A|Isoform 4 of Transformer-2 protein homolog alpha OS=Homo sapiens OX=9606 GN=TRA2A	34551.3|21398.5|21242.4	7	7.76915	0.931154	-3.83775	1.79927	0.10263	0.999039	-4.41601	CA	no_hit
FKBP14	Q9NWM8	Peptidyl-prolyl cis-trans isomerase FKBP14 OS=Homo sapiens OX=9606 GN=FKBP14 PE=1 SV=1	30963	4	6.80945	0.552289	0.841119	1.7992	0.102643	0.999039	-4.41603	CA	no_hit
BCS1L	Q9Y276	Mitochondrial chaperone BCS1 OS=Homo sapiens OX=9606 GN=BCS1L PE=1 SV=1	51021.8	10	7.28641	0.365232	0.26242	1.79828	0.102796	0.999039	-4.41627	CA	no_hit
TP53	A0A0U1RQC9|E7EQX7|J3KP33|P04637|P04637-2|P04637-3|P04637-4|P04637-5|P04637-6|A0A087WT22|A0A087WXZ1|A0A087WZU8|A0A087X1Q1|E7ESS1|P04637-7|P04637-8|P04637-9	Cellular tumor antigen p53 OS=Homo sapiens OX=9606 GN=TP53 PE=1 SV=1|Cellular tumor antigen p53 OS=Homo sapiens OX=9606 GN=TP53 PE=1 SV=1|Cellular tumor antigen p53 OS=Homo sapiens OX=9606 GN=TP53 PE=1 SV=1|Cellular tumor antigen p53 OS=Homo sapiens OX=9606 GN=TP53 PE=1 SV=4|Isoform 2 of Cellular tumor antigen p53 OS=Homo sapiens OX=9606 GN=TP53|Isoform 3 of Cellular tumor antigen p53 OS=Homo sap…	51938.4|34112.9|42434.4|50279.7|42383.2|42753.4|45645.4|37748.9|38119.1|23988.1|23617.8|49208.2|31514.4|25476.9|34915.1|27018.6|27388.8	2	6.39851	-0.65165	-0.763641	-1.79759	0.10291	0.999039	-4.41645	CA	no_hit
CCDC6	Q16204	Coiled-coil domain-containing protein 6 OS=Homo sapiens OX=9606 GN=CCDC6 PE=1 SV=2	63163.5	18	7.78909	-0.504964	0.186066	-1.79702	0.103006	0.999039	-4.4166	CA	no_hit
TMEM120A	A0A024R4K9|A0A087WZA9|A0A087X266|Q9BXJ8|Q9BXJ8-2	Transmembrane protein 120A OS=Homo sapiens OX=9606 GN=TMEM120A PE=1 SV=1|Transmembrane protein 120A (Fragment) OS=Homo sapiens OX=9606 GN=TMEM120A PE=1 SV=1|Transmembrane protein 120A OS=Homo sapiens OX=9606 GN=TMEM120A PE=1 SV=1|Transmembrane protein 120A OS=Homo sapiens OX=9606 GN=TMEM120A PE=1 SV=1|Isoform 2 of Transmembrane protein 120A OS=Homo sapiens OX=9606 GN=TMEM120A	40770.2|24990.6|49138.7|47428.3|40798.2	3	6.89797	0.355764	-0.134929	1.79648	0.103097	0.999039	-4.41674	CA	no_hit
COPS3	Q9UNS2	COP9 signalosome complex subunit 3 OS=Homo sapiens OX=9606 GN=COPS3 PE=1 SV=3	56930	16	7.95617	0.275667	0.180855	1.79261	0.103745	0.999039	-4.41775	CA	no_hit
NIPSNAP2	O75323	Protein NipSnap homolog 2 OS=Homo sapiens OX=9606 GN=NIPSNAP2 PE=1 SV=1	38816.6	10	8.29771	0.256257	0.181807	1.79036	0.104124	0.999039	-4.41834	CA	no_hit
AURKA	O14965	Aurora kinase A OS=Homo sapiens OX=9606 GN=AURKA PE=1 SV=2	55914.6	7	6.98336	-0.379263	-0.973433	-1.78966	0.104242	0.999039	-4.41852	CA	no_hit
TNS3	E9PCX8|Q68CZ2	Tensin-3 (Fragment) OS=Homo sapiens OX=9606 GN=TNS3 PE=1 SV=8|Tensin-3 OS=Homo sapiens OX=9606 GN=TNS3 PE=1 SV=2	153019.0|177965.0	31	7.84449	-0.301601	-0.213679	-1.78944	0.104279	0.999039	-4.41857	CA	no_hit
HK1	P19367|P19367-2|P19367-3|P19367-4	Hexokinase-1 OS=Homo sapiens OX=9606 GN=HK1 PE=1 SV=3|Isoform 2 of Hexokinase-1 OS=Homo sapiens OX=9606 GN=HK1|Isoform 3 of Hexokinase-1 OS=Homo sapiens OX=9606 GN=HK1|Isoform 4 of Hexokinase-1 OS=Homo sapiens OX=9606 GN=HK1	121509.0|120426.0|121514.0|119501.0	27	7.96912	0.303788	0.156393	1.78549	0.104948	0.999039	-4.4196	CA	no_hit
CPTP	Q5TA50	Ceramide-1-phosphate transfer protein OS=Homo sapiens OX=9606 GN=CPTP PE=1 SV=1	26707.1	3	6.3047	0.413928	0.0491749	1.78447	0.105122	0.999039	-4.41987	CA	no_hit
MAPK9	P45984|P45984-2|P45984-3|P45984-4	Mitogen-activated protein kinase 9 OS=Homo sapiens OX=9606 GN=MAPK9 PE=1 SV=2|Isoform Alpha-1 of Mitogen-activated protein kinase 9 OS=Homo sapiens OX=9606 GN=MAPK9|Isoform Beta-1 of Mitogen-activated protein kinase 9 OS=Homo sapiens OX=9606 GN=MAPK9|Isoform Beta-2 of Mitogen-activated protein kinase 9 OS=Homo sapiens OX=9606 GN=MAPK9	57196.1|53053.3|53168.4|57311.2	3	6.8955	0.239764	0.206696	1.78035	0.105826	0.999039	-4.42095	CA	no_hit
MAT2A	P31153|P31153-2	S-adenosylmethionine synthase isoform type-2 OS=Homo sapiens OX=9606 GN=MAT2A PE=1 SV=1|Isoform 2 of S-adenosylmethionine synthase isoform type-2 OS=Homo sapiens OX=9606 GN=MAT2A	52189.1|38952.1	18	8.61732	0.282551	0.329083	1.77816	0.106201	0.999039	-4.42151	CA	no_hit
GDAP1	Q8TB36	Ganglioside-induced differentiation-associated protein 1 OS=Homo sapiens OX=9606 GN=GDAP1 PE=1 SV=3	49152.9	10	7.7375	0.292534	-0.0566584	1.77064	0.1075	0.999039	-4.42347	CA	no_hit
NEP	P03508	Nuclear export protein OS=Influenza A virus (strain A/Puerto Rico/8/1934 H1N1) OX=211044 GN=NEP PE=1 SV=1	16196.5	6	8.91584	0.234616	0.226744	1.76881	0.107819	0.999039	-4.42395	CA	no_hit
LMBRD2	Q68DH5	G-protein coupled receptor-associated protein LMBRD2 OS=Homo sapiens OX=9606 GN=LMBRD2 PE=1 SV=1	91900.1	2	6.4615	0.318955	0.14799	1.76873	0.107833	0.999039	-4.42397	CA	no_hit
NT5C	J3KRC4|Q8TCD5	5'(3')-deoxyribonucleotidase, cytosolic type OS=Homo sapiens OX=9606 GN=NT5C PE=1 SV=1|5'(3')-deoxyribonucleotidase, cytosolic type OS=Homo sapiens OX=9606 GN=NT5C PE=1 SV=2|5'(3')-deoxyribonucleotidase, cytosolic type OS=Homo sapiens OX=9606 GN=NT5C PE=1 SV=2	22687.2|25421.4	8	7.60823	0.265012	0.301991	1.7662	0.108274	0.999039	-4.42463	CA	no_hit
EOGT	Q5NDL2|Q5NDL2-3	EGF domain-specific O-linked N-acetylglucosamine transferase OS=Homo sapiens OX=9606 GN=EOGT PE=1 SV=1|Isoform 3 of EGF domain-specific O-linked N-acetylglucosamine transferase OS=Homo sapiens OX=9606 GN=EOGT|EGF domain-specific O-linked N-acetylglucosamine transferase OS=Homo sapiens OX=9606 GN=EOGT PE=1 SV=1	72256.5|61217.8	5	6.91187	0.327557	0.230009	1.76439	0.108591	0.999039	-4.4251	CA	no_hit
NOP56	O00567	Nucleolar protein 56 OS=Homo sapiens OX=9606 GN=NOP56 PE=1 SV=4	86181.3	18	8.29642	0.545289	-3.43262	1.7635	0.108747	0.999039	-4.42533	CA	no_hit
KNG1	P01042|P01042-2|P01042-3	Kininogen-1 OS=Homo sapiens OX=9606 GN=KNG1 PE=1 SV=2|Isoform LMW of Kininogen-1 OS=Homo sapiens OX=9606 GN=KNG1|Isoform 3 of Kininogen-1 OS=Homo sapiens OX=9606 GN=KNG1	88510.1|58974.9|54193.4	2	7.01018	0.594587	0.223543	1.76322	0.108797	0.999039	-4.42541	CA	no_hit
IFIH1	A0A3B3IRK8|Q9BYX4	Interferon-induced helicase C domain-containing protein 1 OS=Homo sapiens OX=9606 GN=IFIH1 PE=1 SV=1|Interferon-induced helicase C domain-containing protein 1 OS=Homo sapiens OX=9606 GN=IFIH1 PE=1 SV=3|Interferon-induced helicase C domain-containing protein 1 OS=Homo sapiens OX=9606 GN=IFIH1 PE=1 SV=3	137747.0|143784.0	7	6.85788	0.245243	0.0487948	1.76197	0.109016	0.999039	-4.42573	CA	no_hit
SULT2B1	O00204|O00204-2	Sulfotransferase 2B1 OS=Homo sapiens OX=9606 GN=SULT2B1 PE=1 SV=2|Isoform 2 of Sulfotransferase 2B1 OS=Homo sapiens OX=9606 GN=SULT2B1	47289.5|45581.8	6	7.40332	0.254976	0.42945	1.76133	0.109129	0.999039	-4.4259	CA	no_hit
MLYCD	O95822	Malonyl-CoA decarboxylase, mitochondrial OS=Homo sapiens OX=9606 GN=MLYCD PE=1 SV=3	62060.5	13	7.63213	0.29145	0.179746	1.76016	0.109336	0.999039	-4.4262	CA	no_hit
ACACA	A0A087X126|Q13085|Q13085-2|Q13085-3|Q13085-4	Acetyl-CoA carboxylase 1 OS=Homo sapiens OX=9606 GN=ACACA PE=1 SV=1|Acetyl-CoA carboxylase 1 OS=Homo sapiens OX=9606 GN=ACACA PE=1 SV=2|Acetyl-CoA carboxylase 1 OS=Homo sapiens OX=9606 GN=ACACA PE=1 SV=2|Isoform 2 of Acetyl-CoA carboxylase 1 OS=Homo sapiens OX=9606 GN=ACACA|Isoform 3 of Acetyl-CoA carboxylase 1 OS=Homo sapiens OX=9606 GN=ACACA|Isoform 4 of Acetyl-CoA carboxylase 1 OS=Homo sapiens…	13318.9|299950.0|293782.0|291031.0|304696.0	65	7.90879	0.266797	0.118247	1.75928	0.10949	0.999039	-4.42643	CA	no_hit
MRGBP	Q9NV56	MRG/MORF4L-binding protein OS=Homo sapiens OX=9606 GN=MRGBP PE=1 SV=1	27745.6	3	6.60635	-0.44051	-0.153373	-1.75846	0.109636	0.999039	-4.42664	CA	no_hit
NDUFS2	O75306	NADH dehydrogenase [ubiquinone] iron-sulfur protein 2, mitochondrial OS=Homo sapiens OX=9606 GN=NDUFS2 PE=1 SV=2	59603.4	18	8.33815	0.241793	0.181179	1.75459	0.110322	0.999039	-4.42765	CA	no_hit
RHOT1	Q8IXI2-2|Q8IXI2-3|H7BXZ6|Q8IXI2|Q8IXI2-4|Q8IXI2-5|Q8IXI2-7	Isoform 2 of Mitochondrial Rho GTPase 1 OS=Homo sapiens OX=9606 GN=RHOT1|Isoform 3 of Mitochondrial Rho GTPase 1 OS=Homo sapiens OX=9606 GN=RHOT1|Mitochondrial Rho GTPase OS=Homo sapiens OX=9606 GN=RHOT1 PE=1 SV=2|Mitochondrial Rho GTPase 1 OS=Homo sapiens OX=9606 GN=RHOT1 PE=1 SV=2|Isoform 2 of Mitochondrial Rho GTPase 1 OS=Homo sapiens OX=9606 GN=RHOT1|Isoform 3 of Mitochondrial Rho GTPase 1 OS…	89115.5|94858.3|81296.0|84542.0|79389.1|85482.2|90250.9	7	7.21286	0.268247	0.160786	1.74907	0.111308	0.999039	-4.42909	CA	no_hit
RPP38	P78345	Ribonuclease P protein subunit p38 OS=Homo sapiens OX=9606 GN=RPP38 PE=1 SV=2	42385.7	7	7.02913	-0.388274	-1.07147	-1.74699	0.111681	0.999039	-4.42963	CA	no_hit
TATDN1	E5RG17|Q6P1N9	Putative deoxyribonuclease TATDN1 (Fragment) OS=Homo sapiens OX=9606 GN=TATDN1 PE=1 SV=1|Putative deoxyribonuclease TATDN1 OS=Homo sapiens OX=9606 GN=TATDN1 PE=1 SV=2	44932.1|41755.3	15	7.86692	0.231793	0.367834	1.74603	0.111853	0.999039	-4.42987	CA	no_hit
BCAP31	P51572|P51572-2	B-cell receptor-associated protein 31 OS=Homo sapiens OX=9606 GN=BCAP31 PE=1 SV=3|Isoform 2 of B-cell receptor-associated protein 31 OS=Homo sapiens OX=9606 GN=BCAP31	35636.2|43419.2	20	9.03689	0.220079	0.347843	1.74326	0.112354	0.999039	-4.4306	CA	no_hit
DDX42	Q86XP3	ATP-dependent RNA helicase DDX42 OS=Homo sapiens OX=9606 GN=DDX42 PE=1 SV=1	122970	33	8.07907	-0.574121	-0.938542	-1.74291	0.112417	0.999039	-4.43069	CA	no_hit
APC	P25054|P25054-2|E9PFT7	Adenomatous polyposis coli protein OS=Homo sapiens OX=9606 GN=APC PE=1 SV=2|Isoform 2 of Adenomatous polyposis coli protein OS=Homo sapiens OX=9606 GN=APC|Adenomatous polyposis coli protein (Fragment) OS=Homo sapiens OX=9606 GN=APC PE=1 SV=8|Adenomatous polyposis coli protein OS=Homo sapiens OX=9606 GN=APC PE=1 SV=2|Isoform 2 of Adenomatous polyposis coli protein OS=Homo sapiens OX=9606 GN=APC	374159.0|361628.0|168375.0	4	6.4438	-0.56226	-1.08151	-1.74256	0.112481	0.999039	-4.43078	CA	no_hit
SERPINH1	P50454	Serpin H1 OS=Homo sapiens OX=9606 GN=SERPINH1 PE=1 SV=2	56868.3	18	8.8013	0.20974	0.385814	1.74256	0.112481	0.999039	-4.43078	CA	no_hit
NDUFA6	A0A2Y9D025|P56556	NADH dehydrogenase [ubiquinone] 1 alpha subcomplex subunit 6 OS=Homo sapiens OX=9606 GN=NDUFA6 PE=1 SV=1|NADH dehydrogenase [ubiquinone] 1 alpha subcomplex subunit 6 OS=Homo sapiens OX=9606 GN=NDUFA6 PE=1 SV=4	22232.2|18473.2	8	8.11364	0.248238	0.594972	1.74178	0.112622	0.999039	-4.43098	CA	no_hit
SCAF8	A0A0A0MT33|Q9UPN6|Q9UPN6-2	SR-related and CTD-associated factor 8 OS=Homo sapiens OX=9606 GN=SCAF8 PE=1 SV=1|SR-related and CTD-associated factor 8 OS=Homo sapiens OX=9606 GN=SCAF8 PE=1 SV=1|Isoform 2 of SR-related and CTD-associated factor 8 OS=Homo sapiens OX=9606 GN=SCAF8	167476.0|158723.0|165830.0	13	7.55128	-0.421488	-0.643035	-1.74142	0.112688	0.999039	-4.43107	CA	no_hit
CBX1	J3KS05|P83916|B5MD17	Chromobox protein homolog 1 (Fragment) OS=Homo sapiens OX=9606 GN=CBX1 PE=1 SV=8|Chromobox protein homolog 1 OS=Homo sapiens OX=9606 GN=CBX1 PE=1 SV=1|Chromobox protein homolog 1 (Fragment) OS=Homo sapiens OX=9606 GN=CBX1 PE=1 SV=1|Chromobox protein homolog 1 (Fragment) OS=Homo sapiens OX=9606 GN=CBX1 PE=1 SV=8|Chromobox protein homolog 1 OS=Homo sapiens OX=9606 GN=CBX1 PE=1 SV=1	27737.2|30036.4|27032.9	4	7.20224	-0.490262	-0.459847	-1.73962	0.113014	0.999039	-4.43154	CA	no_hit
PCCA	P05165|P05165-2	Propionyl-CoA carboxylase alpha chain, mitochondrial OS=Homo sapiens OX=9606 GN=PCCA PE=1 SV=4|Isoform 2 of Propionyl-CoA carboxylase alpha chain, mitochondrial OS=Homo sapiens OX=9606 GN=PCCA	94324.7|90954.0	15	7.61083	0.25455	0.331456	1.73926	0.11308	0.999039	-4.43164	CA	no_hit
HNRNPA2B1	P22626	Heterogeneous nuclear ribonucleoproteins A2/B1 OS=Homo sapiens OX=9606 GN=HNRNPA2B1 PE=1 SV=2	43243.7	17	9.03274	0.394879	-2.35473	1.73907	0.113115	0.999039	-4.43169	CA	no_hit
PSMA4	H0YKT8|P25789	Proteasome subunit beta (Fragment) OS=Homo sapiens OX=9606 GN=PSMA4 PE=1 SV=8|Proteasome subunit alpha type-4 OS=Homo sapiens OX=9606 GN=PSMA4 PE=1 SV=1	24188.9|37659.7	10	8.6905	0.33105	0.745624	1.73799	0.113311	0.999039	-4.43196	CA	no_hit
TTC4	O95801	Tetratricopeptide repeat protein 4 OS=Homo sapiens OX=9606 GN=TTC4 PE=1 SV=3	54898.1	9	7.36665	0.232787	0.618204	1.73726	0.113444	0.999039	-4.43215	CA	no_hit
ABL1	P00519|P00519-2	Tyrosine-protein kinase ABL1 OS=Homo sapiens OX=9606 GN=ABL1 PE=1 SV=4|Isoform IB of Tyrosine-protein kinase ABL1 OS=Homo sapiens OX=9606 GN=ABL1	148540.0|150507.0	2	6.28362	-0.225155	0.115993	-1.7362	0.113638	0.999039	-4.43243	CA	no_hit
SHC1	P29353|P29353-2|P29353-6|P29353-7	SHC-transforming protein 1 OS=Homo sapiens OX=9606 GN=SHC1 PE=1 SV=4|Isoform p52Shc of SHC-transforming protein 1 OS=Homo sapiens OX=9606 GN=SHC1|Isoform 6 of SHC-transforming protein 1 OS=Homo sapiens OX=9606 GN=SHC1|Isoform 7 of SHC-transforming protein 1 OS=Homo sapiens OX=9606 GN=SHC1	69684.0|57509.8|69755.1|57580.9	11	7.45865	-0.379103	0.385758	-1.73619	0.113639	0.999039	-4.43243	CA	no_hit
CAPZA2	P47755	F-actin-capping protein subunit alpha-2 OS=Homo sapiens OX=9606 GN=CAPZA2 PE=1 SV=3	39545	5	8.11601	0.393231	0.339666	1.73477	0.113899	0.999039	-4.4328	CA	no_hit
COG4	J3KNI1|Q9H9E3	Conserved oligomeric Golgi complex subunit 4 OS=Homo sapiens OX=9606 GN=COG4 PE=1 SV=1|Conserved oligomeric Golgi complex subunit 4 OS=Homo sapiens OX=9606 GN=COG4 PE=1 SV=3	105015.0|104294.0	17	7.21563	0.270086	0.0658682	1.73471	0.11391	0.999039	-4.43282	CA	no_hit
VTI1A	Q96AJ9|Q96AJ9-1	Vesicle transport through interaction with t-SNAREs homolog 1A OS=Homo sapiens OX=9606 GN=VTI1A PE=1 SV=2|Isoform 1 of Vesicle transport through interaction with t-SNAREs homolog 1A OS=Homo sapiens OX=9606 GN=VTI1A	28244.2|27489.6	6	7.50429	0.3684	0.0291194	1.73218	0.114374	0.999039	-4.43347	CA	no_hit
NPEPL1	Q8NDH3|Q8NDH3-4|Q8NDH3-5|Q8NDH3-2	Probable aminopeptidase NPEPL1 OS=Homo sapiens OX=9606 GN=NPEPL1 PE=1 SV=3|Isoform 4 of Probable aminopeptidase NPEPL1 OS=Homo sapiens OX=9606 GN=NPEPL1|Isoform 5 of Probable aminopeptidase NPEPL1 OS=Homo sapiens OX=9606 GN=NPEPL1|Probable aminopeptidase NPEPL1 OS=Homo sapiens OX=9606 GN=NPEPL1 PE=1 SV=3|Isoform 2 of Probable aminopeptidase NPEPL1 OS=Homo sapiens OX=9606 GN=NPEPL1|Isoform 4 of Pr…	62821.9|59691.1|57190.9|49592.4	6	7.32381	0.27259	0.464856	1.73174	0.114456	0.999039	-4.43359	CA	no_hit
SQSTM1	Q13501|Q13501-2	Sequestosome-1 OS=Homo sapiens OX=9606 GN=SQSTM1 PE=1 SV=1|Sequestosome-1 OS=Homo sapiens OX=9606 GN=SQSTM1 PE=1 SV=1|Isoform 2 of Sequestosome-1 OS=Homo sapiens OX=9606 GN=SQSTM1	54539.3|44707.4	9	7.84283	-0.310117	-0.172191	-1.73115	0.114564	0.999039	-4.43374	CA	no_hit
DIDO1	Q9BTC0	Death-inducer obliterator 1 OS=Homo sapiens OX=9606 GN=DIDO1 PE=1 SV=5	290457	29	7.33837	-0.523028	-1.55229	-1.73046	0.114692	0.999039	-4.43392	CA	no_hit
LRRC40	Q9H9A6	Leucine-rich repeat-containing protein 40 OS=Homo sapiens OX=9606 GN=LRRC40 PE=1 SV=1	79367.6	18	7.36198	0.219275	0.163231	1.73034	0.114713	0.999039	-4.43395	CA	no_hit
TUT7	Q5VYS8|Q5VYS8-6	Terminal uridylyltransferase 7 OS=Homo sapiens OX=9606 GN=TUT7 PE=1 SV=1|Isoform 6 of Terminal uridylyltransferase 7 OS=Homo sapiens OX=9606 GN=TUT7|Terminal uridylyltransferase 7 OS=Homo sapiens OX=9606 GN=TUT7 PE=1 SV=1	214356.0|210043.0	9	6.76513	0.382095	-2.10314	1.72981	0.114811	0.999039	-4.43409	CA	no_hit
RAB34	Q9BZG1	Ras-related protein Rab-34 OS=Homo sapiens OX=9606 GN=RAB34 PE=1 SV=1	35262	12	7.90031	0.238331	0.0737654	1.7292	0.114924	0.999039	-4.43425	CA	no_hit
DAAM1	Q9Y4D1|Q9Y4D1-2	Disheveled-associated activator of morphogenesis 1 OS=Homo sapiens OX=9606 GN=DAAM1 PE=1 SV=2|Isoform 2 of Disheveled-associated activator of morphogenesis 1 OS=Homo sapiens OX=9606 GN=DAAM1	153778.0|152307.0	2	6.4462	0.4873	-0.548424	1.72875	0.115008	0.999039	-4.43437	CA	no_hit
CCT5	P48643	T-complex protein 1 subunit epsilon OS=Homo sapiens OX=9606 GN=CCT5 PE=1 SV=1	73169.9	35	8.75209	0.263742	0.327738	1.72846	0.115061	0.999039	-4.43444	CA	no_hit
SPTLC1	O15269	Serine palmitoyltransferase 1 OS=Homo sapiens OX=9606 GN=SPTLC1 PE=1 SV=1	62406.9	15	7.96359	0.214014	0.168843	1.72693	0.115344	0.999039	-4.43484	CA	no_hit
RPS24	A0A2R8Y849|A0A2R8YD14|E7ETK0|P62847|P62847-2|P62847-3|P62847-4	40S ribosomal protein S24 OS=Homo sapiens OX=9606 GN=RPS24 PE=1 SV=1|40S ribosomal protein S24 OS=Homo sapiens OX=9606 GN=RPS24 PE=1 SV=1|40S ribosomal protein S24 OS=Homo sapiens OX=9606 GN=RPS24 PE=1 SV=1|40S ribosomal protein S24 OS=Homo sapiens OX=9606 GN=RPS24 PE=1 SV=1|Isoform 2 of 40S ribosomal protein S24 OS=Homo sapiens OX=9606 GN=RPS24|Isoform 3 of 40S ribosomal protein S24 OS=Homo sapi…	22184.1|26413.2|21879.9|22410.2|21751.8|22616.4|41079.7	6	8.60552	0.580534	-3.67001	1.72675	0.115376	0.999039	-4.43488	CA	no_hit
PHB	P35232	Prohibitin OS=Homo sapiens OX=9606 GN=PHB PE=1 SV=1	33493.4	17	8.84772	0.256558	0.440017	1.72456	0.115784	0.999039	-4.43545	CA	no_hit
ARMT1	Q9H993	Damage-control phosphatase ARMT1 OS=Homo sapiens OX=9606 GN=ARMT1 PE=1 SV=1	60969.4	10	7.70126	0.32191	0.0505305	1.72439	0.115815	0.999039	-4.4355	CA	no_hit
CDH6	P55285	Cadherin-6 OS=Homo sapiens OX=9606 GN=CDH6 PE=1 SV=1	101012	3	6.15395	-0.295432	-0.0802696	-1.72331	0.116017	0.999039	-4.43578	CA	no_hit
UBA2	Q9UBT2|U3KQ93	SUMO-activating enzyme subunit 2 OS=Homo sapiens OX=9606 GN=UBA2 PE=1 SV=2|SUMO-activating enzyme subunit 2 OS=Homo sapiens OX=9606 GN=UBA2 PE=1 SV=1	86351.4|21900.4	31	8.63052	0.219517	0.339544	1.72137	0.116377	0.999039	-4.43628	CA	no_hit
OAS1	F8VXY3|P00973|P00973-2|P00973-3|P00973-4	2'-5'-oligoadenylate synthase 1 OS=Homo sapiens OX=9606 GN=OAS1 PE=1 SV=1|2'-5'-oligoadenylate synthase 1 OS=Homo sapiens OX=9606 GN=OAS1 PE=1 SV=4|Isoform p41 of 2'-5'-oligoadenylate synthase 1 OS=Homo sapiens OX=9606 GN=OAS1|Isoform p48 of 2'-5'-oligoadenylate synthase 1 OS=Homo sapiens OX=9606 GN=OAS1|Isoform p44 of 2'-5'-oligoadenylate synthase 1 OS=Homo sapiens OX=9606 GN=OAS1	49623.8|54536.0|49889.0|55971.0|52091.2	6	6.96647	0.258938	0.139512	1.72116	0.116417	0.999039	-4.43633	CA	no_hit
AKR1B10	O60218	Aldo-keto reductase family 1 member B10 OS=Homo sapiens OX=9606 GN=AKR1B10 PE=1 SV=2	46263.8	25	9.60697	0.214155	0.397569	1.72026	0.116585	0.999039	-4.43657	CA	no_hit
PLEKHA7	E9PKC0|A0A1B0GTN9|Q6IQ23|Q6IQ23-2	Pleckstrin homology domain-containing family A member 7 OS=Homo sapiens OX=9606 GN=PLEKHA7 PE=1 SV=1|Pleckstrin homology domain-containing family A member 7 (Fragment) OS=Homo sapiens OX=9606 GN=PLEKHA7 PE=1 SV=1|Pleckstrin homology domain-containing family A member 7 OS=Homo sapiens OX=9606 GN=PLEKHA7 PE=1 SV=1|Pleckstrin homology domain-containing family A member 7 OS=Homo sapiens OX=9606 GN=PL…	165287.0|155130.0|144966.0|145094.0	6	6.58732	-0.4703	-1.12824	-1.71931	0.116763	0.999039	-4.43681	CA	no_hit
THOP1	P52888	Thimet oligopeptidase OS=Homo sapiens OX=9606 GN=THOP1 PE=1 SV=2	91261.7	27	8.07795	0.275696	0.121696	1.71517	0.117541	0.999039	-4.43789	CA	no_hit
PPP1R9B	Q96SB3	Neurabin-2 OS=Homo sapiens OX=9606 GN=PPP1R9B PE=1 SV=3	104357	9	7.15675	0.380348	-2.20093	1.71474	0.117622	0.999039	-4.438	CA	no_hit
GCLC	P48506	Glutamate--cysteine ligase catalytic subunit OS=Homo sapiens OX=9606 GN=GCLC PE=1 SV=2	85685.9	16	7.8624	0.24523	0.178458	1.71429	0.117707	0.999039	-4.43811	CA	no_hit
PSMD3	O43242	26S proteasome non-ATPase regulatory subunit 3 OS=Homo sapiens OX=9606 GN=PSMD3 PE=1 SV=2	71700.8	30	8.45194	0.321154	0.147784	1.71404	0.117754	0.999039	-4.43818	CA	no_hit
NDUFC2	O95298	NADH dehydrogenase [ubiquinone] 1 subunit C2 OS=Homo sapiens OX=9606 GN=NDUFC2 PE=1 SV=1	16060.7	8	8.01782	0.208396	0.421341	1.71277	0.117994	0.999039	-4.43851	CA	no_hit
EEF2K	O00418	Eukaryotic elongation factor 2 kinase OS=Homo sapiens OX=9606 GN=EEF2K PE=1 SV=2	94222.5	3	7.30552	0.220484	0.25832	1.71178	0.118182	0.999039	-4.43877	CA	no_hit
PHACTR4	Q8IZ21|Q8IZ21-2|Q8IZ21-3	Phosphatase and actin regulator 4 OS=Homo sapiens OX=9606 GN=PHACTR4 PE=1 SV=1|Isoform 2 of Phosphatase and actin regulator 4 OS=Homo sapiens OX=9606 GN=PHACTR4|Isoform 3 of Phosphatase and actin regulator 4 OS=Homo sapiens OX=9606 GN=PHACTR4	94514.2|95431.7|92740.5	4	6.44895	-0.265028	0.384718	-1.70498	0.119476	0.999039	-4.44053	CA	no_hit
GPD1L	Q8N335	Glycerol-3-phosphate dehydrogenase 1-like protein OS=Homo sapiens OX=9606 GN=GPD1L PE=1 SV=1	46930.6	14	7.75925	0.202265	0.208452	1.70444	0.11958	0.999039	-4.44067	CA	no_hit
NAGK	Q9UJ70|Q9UJ70-2	N-acetyl-D-glucosamine kinase OS=Homo sapiens OX=9606 GN=NAGK PE=1 SV=4|Isoform 2 of N-acetyl-D-glucosamine kinase OS=Homo sapiens OX=9606 GN=NAGK	41648.7|46365.0	9	7.6318	0.272889	0.209341	1.70244	0.119963	0.999039	-4.44119	CA	no_hit
RPGR	A0A2R8YFT6|Q92834|Q92834-2|Q92834-4	X-linked retinitis pigmentosa GTPase regulator OS=Homo sapiens OX=9606 GN=RPGR PE=1 SV=1|X-linked retinitis pigmentosa GTPase regulator OS=Homo sapiens OX=9606 GN=RPGR PE=1 SV=2|Isoform 2 of X-linked retinitis pigmentosa GTPase regulator OS=Homo sapiens OX=9606 GN=RPGR|Isoform 4 of X-linked retinitis pigmentosa GTPase regulator OS=Homo sapiens OX=9606 GN=RPGR	85969.0|138679.0|108745.0|101423.0	2	6.24468	-0.26547	0.18335	-1.69922	0.120581	0.999039	-4.44202	CA	no_hit
HEATR6	K7EIX2|Q6AI08	HEAT repeat-containing protein 6 OS=Homo sapiens OX=9606 GN=HEATR6 PE=1 SV=1|HEAT repeat-containing protein 6 OS=Homo sapiens OX=9606 GN=HEATR6 PE=1 SV=1	135701.0|148966.0	3	6.70047	0.275353	0.126155	1.69886	0.120652	0.999039	-4.44211	CA	no_hit
ZYX	Q15942	Zyxin OS=Homo sapiens OX=9606 GN=ZYX PE=1 SV=1	70345	16	8.12077	-0.581514	-0.0114844	-1.69773	0.120871	0.999039	-4.4424	CA	no_hit
KTN1	Q86UP2	Kinectin OS=Homo sapiens OX=9606 GN=KTN1 PE=1 SV=1	210917	74	8.502	0.344761	-0.160765	1.69762	0.120892	0.999039	-4.44243	CA	no_hit
EPS8L2	Q9H6S3|Q9H6S3-3	Epidermal growth factor receptor kinase substrate 8-like protein 2 OS=Homo sapiens OX=9606 GN=EPS8L2 PE=1 SV=2|Isoform 3 of Epidermal growth factor receptor kinase substrate 8-like protein 2 OS=Homo sapiens OX=9606 GN=EPS8L2	95495.1|97195.9	26	7.96983	-0.357123	0.402106	-1.69747	0.12092	0.999039	-4.44247	CA	no_hit
CD3EAP	O15446|O15446-2	DNA-directed RNA polymerase I subunit RPA34 OS=Homo sapiens OX=9606 GN=CD3EAP PE=1 SV=1|Isoform 2 of DNA-directed RNA polymerase I subunit RPA34 OS=Homo sapiens OX=9606 GN=CD3EAP	71967.9|72153.9	5	6.90252	-0.747604	-2.31239	-1.69708	0.120995	0.999039	-4.44257	CA	no_hit
GOT2	P00505	Aspartate aminotransferase, mitochondrial OS=Homo sapiens OX=9606 GN=GOT2 PE=1 SV=3	56708.5	26	8.7957	0.250785	0.278178	1.69704	0.121003	0.999039	-4.44258	CA	no_hit
ARL2	P36404	ADP-ribosylation factor-like protein 2 OS=Homo sapiens OX=9606 GN=ARL2 PE=1 SV=4	24382.2	7	7.44138	0.246276	0.292205	1.69652	0.121104	0.999039	-4.44272	CA	no_hit
DSP	P15924	Desmoplakin OS=Homo sapiens OX=9606 GN=DSP PE=1 SV=3	408247	116	7.98973	1.99376	-1.40731	1.69608	0.121189	0.999039	-4.44283	CA	no_hit
MBD3	K7EIE8|O95983|O95983-2	Methyl-CpG binding domain protein 3, isoform CRA_b OS=Homo sapiens OX=9606 GN=MBD3 PE=1 SV=1|Methyl-CpG-binding domain protein 3 OS=Homo sapiens OX=9606 GN=MBD3 PE=1 SV=1|Isoform 2 of Methyl-CpG-binding domain protein 3 OS=Homo sapiens OX=9606 GN=MBD3|Methyl-CpG-binding domain protein 3 OS=Homo sapiens OX=9606 GN=MBD3 PE=1 SV=1|Isoform 2 of Methyl-CpG-binding domain protein 3 OS=Homo sapiens OX=9…	32257.0|40048.2|36163.3	4	6.91909	-0.613276	0.216519	-1.69583	0.121238	0.999039	-4.4429	CA	no_hit
MFAP1	P55081	Microfibrillar-associated protein 1 OS=Homo sapiens OX=9606 GN=MFAP1 PE=1 SV=2	65311.7	3	7.32477	-0.796163	-2.13561	-1.69499	0.121401	0.999039	-4.44311	CA	no_hit
CCT4	P50991	T-complex protein 1 subunit delta OS=Homo sapiens OX=9606 GN=CCT4 PE=1 SV=4	70265	33	8.89044	0.273609	0.216317	1.69463	0.12147	0.999039	-4.44321	CA	no_hit
OXA1L	A0A087X0L7|J3KNA0|Q15070|Q15070-2	Mitochondrial inner membrane protein OXA1L OS=Homo sapiens OX=9606 GN=OXA1L PE=1 SV=1|Mitochondrial inner membrane protein OXA1L OS=Homo sapiens OX=9606 GN=OXA1L PE=1 SV=1|Mitochondrial inner membrane protein OXA1L OS=Homo sapiens OX=9606 GN=OXA1L PE=1 SV=3|Isoform 2 of Mitochondrial inner membrane protein OXA1L OS=Homo sapiens OX=9606 GN=OXA1L	54059.1|62192.6|54087.2|52175.1	9	8.01572	0.216232	0.0536525	1.69304	0.121779	0.999039	-4.44362	CA	no_hit
WNK1	F5GWT4|Q9H4A3|Q9H4A3-2|Q9H4A3-5|Q9H4A3-6|Q9H4A3-7	Serine/threonine-protein kinase WNK1 OS=Homo sapiens OX=9606 GN=WNK1 PE=1 SV=1|Serine/threonine-protein kinase WNK1 OS=Homo sapiens OX=9606 GN=WNK1 PE=1 SV=2|Isoform 2 of Serine/threonine-protein kinase WNK1 OS=Homo sapiens OX=9606 GN=WNK1|Isoform 4 of Serine/threonine-protein kinase WNK1 OS=Homo sapiens OX=9606 GN=WNK1|Isoform 5 of Serine/threonine-protein kinase WNK1 OS=Homo sapiens OX=9606 GN=…	259683.0|285015.0|259740.0|316935.0|316027.0|337832.0	23	7.46548	-0.536746	-0.559932	-1.69223	0.121937	0.999039	-4.44383	CA	no_hit
NDUFB9	A0A3B3IT57|E7EWZ0|E9PF49|Q9Y6M9|E9PH64	NADH dehydrogenase [ubiquinone] 1 beta subcomplex subunit 9 OS=Homo sapiens OX=9606 GN=NDUFB9 PE=1 SV=1|NADH dehydrogenase [ubiquinone] 1 beta subcomplex subunit 9 OS=Homo sapiens OX=9606 GN=NDUFB9 PE=1 SV=1|NADH dehydrogenase [ubiquinone] 1 beta subcomplex subunit 9 OS=Homo sapiens OX=9606 GN=NDUFB9 PE=1 SV=1|NADH dehydrogenase [ubiquinone] 1 beta subcomplex subunit 9 OS=Homo sapiens OX=9606 GN=…	21027.9|25745.3|31777.5|26303.8|24495.9	7	7.98219	0.244659	0.596353	1.6921	0.121962	0.999039	-4.44386	CA	no_hit
TANK	E7EQA9|Q92844	TRAF family member-associated NF-kappa-B activator OS=Homo sapiens OX=9606 GN=TANK PE=1 SV=1|TRAF family member-associated NF-kappa-B activator OS=Homo sapiens OX=9606 GN=TANK PE=1 SV=2	56237.8|57539.4	4	6.56381	-0.463343	0.4169	-1.69207	0.121968	0.999039	-4.44387	CA	no_hit
SIN3A	Q96ST3	Paired amphipathic helix protein Sin3a OS=Homo sapiens OX=9606 GN=SIN3A PE=1 SV=2	172349	19	7.3869	-0.592047	-1.32793	-1.6901	0.122353	0.999039	-4.44438	CA	no_hit
CFAP36	Q96G28|Q96G28-2	Cilia- and flagella-associated protein 36 OS=Homo sapiens OX=9606 GN=CFAP36 PE=1 SV=2|Isoform 2 of Cilia- and flagella-associated protein 36 OS=Homo sapiens OX=9606 GN=CFAP36	49327.6|52226.1	3	6.31623	-0.557637	0.440721	-1.68682	0.122996	0.999039	-4.44523	CA	no_hit
CAVIN2	O95810	Caveolae-associated protein 2 OS=Homo sapiens OX=9606 GN=CAVIN2 PE=1 SV=3	58761.5	6	7.10006	-0.374291	-1.26822	-1.68675	0.123008	0.999039	-4.44524	CA	no_hit
SPTBN2	O15020|O15020-2	Spectrin beta chain, non-erythrocytic 2 OS=Homo sapiens OX=9606 GN=SPTBN2 PE=1 SV=3|Isoform 2 of Spectrin beta chain, non-erythrocytic 2 OS=Homo sapiens OX=9606 GN=SPTBN2	309031.0|305331.0	9	6.65686	0.56	-0.7493	1.68618	0.12312	0.999039	-4.44539	CA	no_hit
PPP2R1B	P30154|P30154-2|P30154-4	Serine/threonine-protein phosphatase 2A 65 kDa regulatory subunit A beta isoform OS=Homo sapiens OX=9606 GN=PPP2R1B PE=1 SV=3|Isoform 2 of Serine/threonine-protein phosphatase 2A 65 kDa regulatory subunit A beta isoform OS=Homo sapiens OX=9606 GN=PPP2R1B|Isoform 4 of Serine/threonine-protein phosphatase 2A 65 kDa regulatory subunit A beta isoform OS=Homo sapiens OX=9606 GN=PPP2R1B|Serine/threonin…	75924.9|84508.5|70115.7	4	6.69637	0.291979	0.144741	1.68485	0.123383	0.999039	-4.44573	CA	no_hit
KIAA0100	Q14667|K7EQ86|Q08E86	Protein KIAA0100 OS=Homo sapiens OX=9606 GN=KIAA0100 PE=1 SV=3|KIAA0100, isoform CRA_a OS=Homo sapiens OX=9606 GN=KIAA0100 PE=1 SV=1|KIAA0100 protein OS=Homo sapiens OX=9606 GN=KIAA0100 PE=1 SV=1|Protein KIAA0100 OS=Homo sapiens OX=9606 GN=KIAA0100 PE=1 SV=3	291698.0|272701.0|272715.0	9	6.53719	0.220398	0.104377	1.68422	0.123506	0.999039	-4.4459	CA	no_hit
GDI2	P50395|Q5SX86	Rab GDP dissociation inhibitor beta OS=Homo sapiens OX=9606 GN=GDI2 PE=1 SV=2|Rab GDP dissociation inhibitor beta OS=Homo sapiens OX=9606 GN=GDI2 PE=1 SV=2|Rab GDP dissociation inhibitor (Fragment) OS=Homo sapiens OX=9606 GN=GDI2 PE=1 SV=1	62342.7|22334.3	22	8.5718	0.2437	0.431927	1.68377	0.123595	0.999039	-4.44601	CA	no_hit
RPN1	P04843	Dolichyl-diphosphooligosaccharide--protein glycosyltransferase subunit 1 OS=Homo sapiens OX=9606 GN=RPN1 PE=1 SV=1	80809.1	31	8.72752	0.21851	0.189155	1.68265	0.123817	0.999039	-4.4463	CA	no_hit
GFM2	Q969S9|Q969S9-3	Ribosome-releasing factor 2, mitochondrial OS=Homo sapiens OX=9606 GN=GFM2 PE=1 SV=1|Isoform 3 of Ribosome-releasing factor 2, mitochondrial OS=Homo sapiens OX=9606 GN=GFM2	100482.0|100206.0	11	7.38582	0.333878	-0.0762461	1.68188	0.123968	0.999039	-4.4465	CA	no_hit
CC2D1B	Q5T0F9|Q5T0F9-2	Coiled-coil and C2 domain-containing protein 1B OS=Homo sapiens OX=9606 GN=CC2D1B PE=1 SV=1|Isoform 2 of Coiled-coil and C2 domain-containing protein 1B OS=Homo sapiens OX=9606 GN=CC2D1B	109909.0|109280.0	9	6.98038	-0.417614	-0.13212	-1.68178	0.123989	0.999039	-4.44653	CA	no_hit
STAMBPL1	Q96FJ0	AMSH-like protease OS=Homo sapiens OX=9606 GN=STAMBPL1 PE=1 SV=2	60474.5	7	6.94301	0.331624	-0.494215	1.68167	0.124011	0.999039	-4.44656	CA	no_hit
RBKS	Q9H477|Q9H477-2	Ribokinase OS=Homo sapiens OX=9606 GN=RBKS PE=1 SV=1|Isoform 2 of Ribokinase OS=Homo sapiens OX=9606 GN=RBKS	39140.6|36330.4	5	7.33688	0.191027	0.257936	1.68046	0.12425	0.999039	-4.44687	CA	no_hit
NLRP2	A0A0G2JMG8|A0A0G2JPQ2|Q9NX02|Q9NX02-5	NACHT, LRR and PYD domains-containing protein 2 OS=Homo sapiens OX=9606 GN=NLRP2 PE=1 SV=1|NACHT, LRR and PYD domains-containing protein 2 OS=Homo sapiens OX=9606 GN=NLRP2 PE=1 SV=1|NACHT, LRR and PYD domains-containing protein 2 OS=Homo sapiens OX=9606 GN=NLRP2 PE=1 SV=1|Isoform 5 of NACHT, LRR and PYD domains-containing protein 2 OS=Homo sapiens OX=9606 GN=NLRP2	139641.0|142937.0|142967.0|139671.0	31	7.80359	0.264409	0.0442	1.67874	0.124591	0.999039	-4.44731	CA	no_hit
SPIN1	Q9Y657	Spindlin-1 OS=Homo sapiens OX=9606 GN=SPIN1 PE=1 SV=3	36084.2	5	6.63363	-0.262152	-0.288109	-1.67634	0.125069	0.999039	-4.44793	CA	no_hit
SF1	Q15637-2|Q15637-5|Q15637-6|Q15637|Q15637-3|Q15637-4	Isoform 2 of Splicing factor 1 OS=Homo sapiens OX=9606 GN=SF1|Isoform 5 of Splicing factor 1 OS=Homo sapiens OX=9606 GN=SF1|Isoform 6 of Splicing factor 1 OS=Homo sapiens OX=9606 GN=SF1|Splicing factor 1 OS=Homo sapiens OX=9606 GN=SF1 PE=1 SV=4|Isoform 2 of Splicing factor 1 OS=Homo sapiens OX=9606 GN=SF1|Isoform 3 of Splicing factor 1 OS=Homo sapiens OX=9606 GN=SF1|Isoform 4 of Splicing factor 1…	77335.1|81060.5|71565.5|76727.6|76093.8|68115.6	13	7.81271	-0.473065	0.178043	-1.67471	0.125393	0.999039	-4.44835	CA	no_hit
GNAI1	P63096	Guanine nucleotide-binding protein G(i) subunit alpha-1 OS=Homo sapiens OX=9606 GN=GNAI1 PE=1 SV=2	50031.7	5	7.38497	0.299145	-0.236092	1.67348	0.125639	0.999039	-4.44867	CA	no_hit
SAP30BP	J3QQJ0|Q9UHR5|Q9UHR5-2	SAP30-binding protein (Fragment) OS=Homo sapiens OX=9606 GN=SAP30BP PE=1 SV=1|SAP30-binding protein OS=Homo sapiens OX=9606 GN=SAP30BP PE=1 SV=1|Isoform 2 of SAP30-binding protein OS=Homo sapiens OX=9606 GN=SAP30BP	45767.2|43394.1|40985.0	7	7.28533	-0.243917	-0.613536	-1.67302	0.125732	0.999039	-4.44879	CA	no_hit
PSMB2	P49721	Proteasome subunit beta type-2 OS=Homo sapiens OX=9606 GN=PSMB2 PE=1 SV=1	26339	7	8.44263	0.272369	0.860744	1.67208	0.125921	0.999039	-4.44903	CA	no_hit
TACC3	A0A494BZT8|Q9Y6A5	Transforming acidic coiled-coil-containing protein 3 OS=Homo sapiens OX=9606 GN=TACC3 PE=1 SV=1|Transforming acidic coiled-coil-containing protein 3 OS=Homo sapiens OX=9606 GN=TACC3 PE=1 SV=1	106795.0|107586.0	9	7.21352	-0.485367	0.214192	-1.67141	0.126054	0.999039	-4.4492	CA	no_hit
IRF2BP2	Q7Z5L9-2	Isoform 2 of Interferon regulatory factor 2-binding protein 2 OS=Homo sapiens OX=9606 GN=IRF2BP2	67181.9	8	7.34898	-0.485873	0.196612	-1.66867	0.126607	0.999039	-4.44991	CA	no_hit
CCDC137	I3L0U5|Q6PK04	Coiled-coil domain-containing protein 137 (Fragment) OS=Homo sapiens OX=9606 GN=CCDC137 PE=1 SV=1|Coiled-coil domain-containing protein 137 OS=Homo sapiens OX=9606 GN=CCDC137 PE=1 SV=1	43904.3|43915.4	4	6.79292	-0.74204	-2.76683	-1.66802	0.126737	0.999039	-4.45008	CA	no_hit
PHC2	A0A0A0MSI2|B3KPJ4|Q8IXK0|Q8IXK0-2|Q8IXK0-4|Q8IXK0-5	Polyhomeotic-like protein 2 OS=Homo sapiens OX=9606 GN=PHC2 PE=1 SV=1|Polyhomeotic-like protein 2 OS=Homo sapiens OX=9606 GN=PHC2 PE=1 SV=1|Polyhomeotic-like protein 2 OS=Homo sapiens OX=9606 GN=PHC2 PE=1 SV=1|Isoform 2 of Polyhomeotic-like protein 2 OS=Homo sapiens OX=9606 GN=PHC2|Isoform 4 of Polyhomeotic-like protein 2 OS=Homo sapiens OX=9606 GN=PHC2|Isoform 5 of Polyhomeotic-like protein 2 OS…	98579.4|59459.4|101380.0|43741.4|98480.3|101479.0	5	6.94639	-0.480091	-1.01179	-1.668	0.126741	0.999039	-4.45008	CA	no_hit
SCAF4	O95104|O95104-3	SR-related and CTD-associated factor 4 OS=Homo sapiens OX=9606 GN=SCAF4 PE=1 SV=3|Isoform 3 of SR-related and CTD-associated factor 4 OS=Homo sapiens OX=9606 GN=SCAF4	143472.0|140402.0	5	7.1663	-0.385096	-0.728748	-1.66662	0.12702	0.999039	-4.45044	CA	no_hit
PRKCA	P17252	Protein kinase C alpha type OS=Homo sapiens OX=9606 GN=PRKCA PE=1 SV=4	95788.8	18	7.85708	0.257139	0.0892802	1.66623	0.127099	0.999039	-4.45054	CA	no_hit
MUC5AC	P98088	Mucin-5AC OS=Homo sapiens OX=9606 GN=MUC5AC PE=1 SV=4	639685	42	8.10258	-0.984706	-0.909594	-1.6658	0.127186	0.999039	-4.45065	CA	no_hit
NQO1	P15559|P15559-2|P15559-3	NAD(P)H dehydrogenase [quinone] 1 OS=Homo sapiens OX=9606 GN=NQO1 PE=1 SV=1|Isoform 2 of NAD(P)H dehydrogenase [quinone] 1 OS=Homo sapiens OX=9606 GN=NQO1|Isoform 3 of NAD(P)H dehydrogenase [quinone] 1 OS=Homo sapiens OX=9606 GN=NQO1	38206.0|34027.8|33098.3	15	9.34355	0.240864	0.338384	1.66396	0.127559	0.999039	-4.45113	CA	no_hit
ESYT1	Q9BSJ8|Q9BSJ8-2	Extended synaptotagmin-1 OS=Homo sapiens OX=9606 GN=ESYT1 PE=1 SV=1|Isoform 2 of Extended synaptotagmin-1 OS=Homo sapiens OX=9606 GN=ESYT1	139416.0|140562.0	26	8.17361	0.23309	0.171062	1.66316	0.127721	0.999039	-4.45133	CA	no_hit
TTC9C	Q8N5M4|H0YDR3	Tetratricopeptide repeat protein 9C OS=Homo sapiens OX=9606 GN=TTC9C PE=1 SV=1|Tetratricopeptide repeat protein 9C (Fragment) OS=Homo sapiens OX=9606 GN=TTC9C PE=1 SV=1|Tetratricopeptide repeat protein 9C OS=Homo sapiens OX=9606 GN=TTC9C PE=1 SV=1	22547.9|9369.03	3	7.09715	-0.433425	0.770169	-1.6603	0.128304	0.999039	-4.45207	CA	no_hit
ARMC9	A0A2Q3DP09|Q7Z3E5|Q7Z3E5-2	LisH domain-containing protein ARMC9 OS=Homo sapiens OX=9606 GN=ARMC9 PE=1 SV=1|LisH domain-containing protein ARMC9 OS=Homo sapiens OX=9606 GN=ARMC9 PE=1 SV=3|Isoform 2 of LisH domain-containing protein ARMC9 OS=Homo sapiens OX=9606 GN=ARMC9	90284.9|108625.0|90717.2	3	6.6668	0.211241	0.186889	1.66029	0.128305	0.999039	-4.45207	CA	no_hit
TOE1	Q96GM8|Q96GM8-2	Target of EGR1 protein 1 OS=Homo sapiens OX=9606 GN=TOE1 PE=1 SV=1|Isoform 2 of Target of EGR1 protein 1 OS=Homo sapiens OX=9606 GN=TOE1|Target of EGR1 protein 1 OS=Homo sapiens OX=9606 GN=TOE1 PE=1 SV=1	66189.3|55236.1	3	6.6583	-0.420485	-0.716311	-1.65818	0.128736	0.999039	-4.45261	CA	no_hit
NIFK	Q9BYG3	MKI67 FHA domain-interacting nucleolar phosphoprotein OS=Homo sapiens OX=9606 GN=NIFK PE=1 SV=1	45019.4	10	7.62566	0.478411	-2.97635	1.65761	0.128854	0.999039	-4.45276	CA	no_hit
NADK2	Q4G0N4	NAD kinase 2, mitochondrial OS=Homo sapiens OX=9606 GN=NADK2 PE=1 SV=2	54839.7	16	7.5866	0.209336	0.379809	1.65469	0.129452	0.999039	-4.45351	CA	no_hit
TDRKH	E9PQX4|F6TB26|Q5SZR4|Q9Y2W6|Q9Y2W6-3	Tudor and KH domain-containing protein OS=Homo sapiens OX=9606 GN=TDRKH PE=1 SV=1|Tudor and KH domain-containing protein OS=Homo sapiens OX=9606 GN=TDRKH PE=1 SV=1|Tudor and KH domain containing, isoform CRA_a OS=Homo sapiens OX=9606 GN=TDRKH PE=1 SV=1|Tudor and KH domain-containing protein OS=Homo sapiens OX=9606 GN=TDRKH PE=1 SV=2|Isoform 2 of Tudor and KH domain-containing protein OS=Homo sapi…	7019.84|77230.6|71007.4|71837.0|65985.7	9	6.91819	0.202026	0.350356	1.65443	0.129505	0.999039	-4.45358	CA	no_hit
YIPF6	Q96EC8	Protein YIPF6 OS=Homo sapiens OX=9606 GN=YIPF6 PE=1 SV=2	28292	2	6.98826	-0.311098	0.19599	-1.65038	0.130341	0.999039	-4.45462	CA	no_hit
UNC13D	Q70J99|Q70J99-3	Protein unc-13 homolog D OS=Homo sapiens OX=9606 GN=UNC13D PE=1 SV=1|Isoform 3 of Protein unc-13 homolog D OS=Homo sapiens OX=9606 GN=UNC13D	137065.0|143264.0	13	7.08193	0.23631	-0.0456042	1.65003	0.130413	0.999039	-4.45471	CA	no_hit
GABARAP	H6UMI1|O95166	GABARAP-a OS=Homo sapiens OX=9606 GN=GABARAP PE=1 SV=1|Gamma-aminobutyric acid receptor-associated protein OS=Homo sapiens OX=9606 GN=GABARAP PE=1 SV=1	15300.8|17559.8	2	7.68499	0.234891	0.290112	1.64986	0.130449	0.999039	-4.45476	CA	no_hit
GOT1	P17174	Aspartate aminotransferase, cytoplasmic OS=Homo sapiens OX=9606 GN=GOT1 PE=1 SV=3	52835	19	8.18303	0.184021	0.46821	1.64964	0.130495	0.999039	-4.45482	CA	no_hit
DIAPH1	A0A0G2JH68	Protein diaphanous homolog 1 OS=Homo sapiens OX=9606 GN=DIAPH1 PE=1 SV=1	173590	38	8.05171	0.237164	0.201162	1.64652	0.131142	0.999039	-4.45562	CA	no_hit
NUP35	Q8NFH5|Q8NFH5-2	Nucleoporin NUP35 OS=Homo sapiens OX=9606 GN=NUP35 PE=1 SV=1|Isoform 2 of Nucleoporin NUP35 OS=Homo sapiens OX=9606 GN=NUP35	39428.6|37775.8	9	7.32106	-0.367431	0.00666598	-1.64615	0.131219	0.999039	-4.45571	CA	no_hit
MBNL1	A0A0A0MQX8|C9JP00|H7C4T5|Q9NR56|Q9NR56-2|Q9NR56-3|Q9NR56-4|Q9NR56-5|Q9NR56-6|Q9NR56-7	Muscleblind-like protein 1 OS=Homo sapiens OX=9606 GN=MBNL1 PE=1 SV=1|Muscleblind-like protein 1 OS=Homo sapiens OX=9606 GN=MBNL1 PE=1 SV=1|Muscleblind-like protein 1 (Fragment) OS=Homo sapiens OX=9606 GN=MBNL1 PE=1 SV=1|Muscleblind-like protein 1 OS=Homo sapiens OX=9606 GN=MBNL1 PE=1 SV=2|Isoform 2 of Muscleblind-like protein 1 OS=Homo sapiens OX=9606 GN=MBNL1|Isoform 3 of Muscleblind-like prote…	49224.6|43843.7|41159.1|48007.0|45413.5|38332.7|39550.3|46631.1|42467.8|42442.8	5	7.69134	-0.471983	0.444397	-1.64448	0.131568	0.999039	-4.45614	CA	no_hit
OLA1	J3KQ32|Q9NTK5|Q9NTK5-3	Obg-like ATPase 1 OS=Homo sapiens OX=9606 GN=OLA1 PE=1 SV=1|Obg-like ATPase 1 OS=Homo sapiens OX=9606 GN=OLA1 PE=1 SV=2|Isoform 3 of Obg-like ATPase 1 OS=Homo sapiens OX=9606 GN=OLA1	60825.8|58328.5|40166.4	21	8.54548	0.187461	0.314569	1.64398	0.131672	0.999039	-4.45627	CA	no_hit
ARPP19	H3BMD8|P56211|P56211-2	cAMP-regulated phosphoprotein 19 OS=Homo sapiens OX=9606 GN=ARPP19 PE=1 SV=1|cAMP-regulated phosphoprotein 19 OS=Homo sapiens OX=9606 GN=ARPP19 PE=1 SV=2|Isoform ARPP-16 of cAMP-regulated phosphoprotein 19 OS=Homo sapiens OX=9606 GN=ARPP19	19342.7|17182.6|15191.7	3	7.24566	-1.01635	1.17012	-1.64278	0.131923	0.999039	-4.45658	CA	no_hit
QRICH1	Q2TAL8	Glutamine-rich protein 1 OS=Homo sapiens OX=9606 GN=QRICH1 PE=1 SV=1	95964.3	6	7.00691	-0.540543	-0.313118	-1.64264	0.131952	0.999039	-4.45662	CA	no_hit
ARID1B	A0A1B0GTJ8|A0A1B0GV63|A0A1B0GVK1|A0A1B0GWJ2|A0A3F2YNW7|H0Y7H8|Q8NFD5|Q8NFD5-2|Q8NFD5-3|Q8NFD5-4	AT-rich interactive domain-containing protein 1B (Fragment) OS=Homo sapiens OX=9606 GN=ARID1B PE=1 SV=1|AT-rich interactive domain-containing protein 1B (Fragment) OS=Homo sapiens OX=9606 GN=ARID1B PE=1 SV=1|AT-rich interactive domain-containing protein 1B OS=Homo sapiens OX=9606 GN=ARID1B PE=1 SV=1|AT-rich interactive domain-containing protein 1B OS=Homo sapiens OX=9606 GN=ARID1B PE=1 SV=1|AT-ri…	185787.0|170285.0|190213.0|183948.0|271354.0|213751.0|261698.0|263539.0|267339.0|184573.0	8	6.59295	-0.60701	-0.914877	-1.64177	0.132133	0.999039	-4.45684	CA	no_hit
MISP	Q8IVT2	Mitotic interactor and substrate of PLK1 OS=Homo sapiens OX=9606 GN=MISP PE=1 SV=1	82174.6	25	8.18993	-0.504329	-2.27482	-1.64162	0.132164	0.999039	-4.45688	CA	no_hit
CHMP2A	O43633	Charged multivesicular body protein 2a OS=Homo sapiens OX=9606 GN=CHMP2A PE=1 SV=1	30867.8	11	7.93166	0.42499	0.337122	1.64139	0.132213	0.999039	-4.45694	CA	no_hit
BAG4	O95429|O95429-2	BAG family molecular chaperone regulator 4 OS=Homo sapiens OX=9606 GN=BAG4 PE=1 SV=1|Isoform 2 of BAG family molecular chaperone regulator 4 OS=Homo sapiens OX=9606 GN=BAG4	53746.2|49564.2	3	6.86992	-0.587142	0.268922	-1.64113	0.132267	0.999039	-4.457	CA	no_hit
ANXA6	E5RK69|P08133|P08133-2	Annexin OS=Homo sapiens OX=9606 GN=ANXA6 PE=1 SV=1|Annexin A6 OS=Homo sapiens OX=9606 GN=ANXA6 PE=1 SV=3|Annexin OS=Homo sapiens OX=9606 GN=ANXA6 PE=1 SV=1|Annexin A6 OS=Homo sapiens OX=9606 GN=ANXA6 PE=1 SV=3|Isoform 2 of Annexin A6 OS=Homo sapiens OX=9606 GN=ANXA6	63170.9|91986.5|87930.4	25	7.74591	0.232283	0.0686461	1.63666	0.133209	0.999039	-4.45815	CA	no_hit
SNX15	Q9NRS6	Sorting nexin-15 OS=Homo sapiens OX=9606 GN=SNX15 PE=1 SV=1	43191.9	3	6.70915	-0.347293	0.122059	-1.63584	0.133381	0.999039	-4.45836	CA	no_hit
KMT2D	O14686|O14686-3	Histone-lysine N-methyltransferase 2D OS=Homo sapiens OX=9606 GN=KMT2D PE=1 SV=2|Isoform 3 of Histone-lysine N-methyltransferase 2D OS=Homo sapiens OX=9606 GN=KMT2D	667109.0|667396.0	6	6.39928	-0.613024	-1.49466	-1.6351	0.133537	0.999039	-4.45855	CA	no_hit
HGS	O14964	Hepatocyte growth factor-regulated tyrosine kinase substrate OS=Homo sapiens OX=9606 GN=HGS PE=1 SV=1	98267.6	15	7.88532	-0.368879	0.148126	-1.6348	0.1336	0.999039	-4.45863	CA	no_hit
TIMMDC1	Q9NPL8	Complex I assembly factor TIMMDC1, mitochondrial OS=Homo sapiens OX=9606 GN=TIMMDC1 PE=1 SV=2	37500.4	9	7.92002	0.251069	-0.143044	1.63352	0.133872	0.999039	-4.45896	CA	no_hit
VARS1	P26640	Valine--tRNA ligase OS=Homo sapiens OX=9606 GN=VARS1 PE=1 SV=4	158982	44	8.15559	0.253732	0.119905	1.63287	0.13401	0.999039	-4.45913	CA	no_hit
TPRN	Q4KMQ1	Taperin OS=Homo sapiens OX=9606 GN=TPRN PE=1 SV=2	83704.2	3	6.57235	0.326305	0.169737	1.63225	0.134141	0.999039	-4.45928	CA	no_hit
UBAP2L	F8W726|Q14157-4|Q14157|Q14157-5	Ubiquitin-associated protein 2-like OS=Homo sapiens OX=9606 GN=UBAP2L PE=1 SV=2|Isoform 4 of Ubiquitin-associated protein 2-like OS=Homo sapiens OX=9606 GN=UBAP2L|Ubiquitin-associated protein 2-like OS=Homo sapiens OX=9606 GN=UBAP2L PE=1 SV=2|Ubiquitin-associated protein 2-like OS=Homo sapiens OX=9606 GN=UBAP2L PE=1 SV=2|Isoform 5 of Ubiquitin-associated protein 2-like OS=Homo sapiens OX=9606 GN=…	124377.0|113563.0|125531.0|127749.0	17	8.0756	-0.396077	-0.372475	-1.63166	0.134267	0.999039	-4.45944	CA	no_hit
ACOX3	O15254	Peroxisomal acyl-coenzyme A oxidase 3 OS=Homo sapiens OX=9606 GN=ACOX3 PE=1 SV=2	88360	7	7.12907	0.342803	0.118189	1.63051	0.134511	0.999039	-4.45973	CA	no_hit
GIGYF2	Q6Y7W6|Q6Y7W6-4|Q6Y7W6-5	GRB10-interacting GYF protein 2 OS=Homo sapiens OX=9606 GN=GIGYF2 PE=1 SV=1|Isoform 3 of GRB10-interacting GYF protein 2 OS=Homo sapiens OX=9606 GN=GIGYF2|Isoform 4 of GRB10-interacting GYF protein 2 OS=Homo sapiens OX=9606 GN=GIGYF2	171919.0|170485.0|171336.0	25	7.43465	-0.347284	-0.359714	-1.63019	0.134578	0.999039	-4.45981	CA	no_hit
SARM1	Q6SZW1|Q6SZW1-2	NAD(+) hydrolase SARM1 OS=Homo sapiens OX=9606 GN=SARM1 PE=1 SV=1|Isoform 2 of NAD(+) hydrolase SARM1 OS=Homo sapiens OX=9606 GN=SARM1	89186.6|84473.3	7	6.64983	0.258002	0.151014	1.6299	0.134641	0.999039	-4.45989	CA	no_hit
AASDHPPT	Q9NRN7	L-aminoadipate-semialdehyde dehydrogenase-phosphopantetheinyl transferase OS=Homo sapiens OX=9606 GN=AASDHPPT PE=1 SV=2	42369.5	11	7.83383	0.234305	0.103125	1.62935	0.134758	0.999039	-4.46003	CA	no_hit
ANXA5	P08758	Annexin A5 OS=Homo sapiens OX=9606 GN=ANXA5 PE=1 SV=2	42664	22	8.9277	0.23436	0.320357	1.62809	0.135028	0.999039	-4.46035	CA	no_hit
SLBP	E7EUV9|F8W8D3|H0YAE8|Q14493|H7C4H8|Q14493-2	Histone RNA hairpin-binding protein OS=Homo sapiens OX=9606 GN=SLBP PE=1 SV=1|Histone RNA hairpin-binding protein OS=Homo sapiens OX=9606 GN=SLBP PE=1 SV=1|Histone RNA hairpin-binding protein (Fragment) OS=Homo sapiens OX=9606 GN=SLBP PE=1 SV=1|Histone RNA hairpin-binding protein OS=Homo sapiens OX=9606 GN=SLBP PE=1 SV=1|Histone RNA hairpin-binding protein OS=Homo sapiens OX=9606 GN=SLBP PE=1 SV=…	32078.6|37531.2|30843.1|36722.8|25872.9|31830.3	3	6.57572	-0.210107	-0.0675491	-1.6277	0.13511	0.999039	-4.46045	CA	no_hit
FASN	P49327	Fatty acid synthase OS=Homo sapiens OX=9606 GN=FASN PE=1 SV=3	301735	97	8.72785	0.283487	0.203782	1.62721	0.135215	0.999039	-4.46058	CA	no_hit
PKM	P14618|P14618-2	Pyruvate kinase PKM OS=Homo sapiens OX=9606 GN=PKM PE=1 SV=4|Isoform M1 of Pyruvate kinase PKM OS=Homo sapiens OX=9606 GN=PKM	69725.9|69793.8	45	9.66581	0.209089	0.550699	1.62651	0.135364	0.999039	-4.46076	CA	no_hit
PITPNB	P48739|P48739-2|P48739-3	Phosphatidylinositol transfer protein beta isoform OS=Homo sapiens OX=9606 GN=PITPNB PE=1 SV=2|Isoform 2 of Phosphatidylinositol transfer protein beta isoform OS=Homo sapiens OX=9606 GN=PITPNB|Isoform 3 of Phosphatidylinositol transfer protein beta isoform OS=Homo sapiens OX=9606 GN=PITPNB	40018.6|39812.4|40235.6	12	7.71581	0.21894	0.313733	1.62651	0.135365	0.999039	-4.46076	CA	no_hit
GNAI2	P04899|P04899-4	Guanine nucleotide-binding protein G(i) subunit alpha-2 OS=Homo sapiens OX=9606 GN=GNAI2 PE=1 SV=3|Isoform sGi2 of Guanine nucleotide-binding protein G(i) subunit alpha-2 OS=Homo sapiens OX=9606 GN=GNAI2	49208.9|50248.4	6	7.21861	0.263245	-0.431707	1.62624	0.135422	0.999039	-4.46083	CA	no_hit
OGFOD1	A0A0A0MTR2|Q8N543	Prolyl 3-hydroxylase OGFOD1 OS=Homo sapiens OX=9606 GN=OGFOD1 PE=1 SV=1|Prolyl 3-hydroxylase OGFOD1 OS=Homo sapiens OX=9606 GN=OGFOD1 PE=1 SV=1	70661.9|75830.6	13	7.46142	0.227993	0.156515	1.62399	0.135905	0.999039	-4.4614	CA	no_hit
GLTP	F5H0U5|Q9NZD2	Glycolipid transfer protein OS=Homo sapiens OX=9606 GN=GLTP PE=1 SV=1|Glycolipid transfer protein OS=Homo sapiens OX=9606 GN=GLTP PE=1 SV=3	26683.7|29481.2	9	7.36309	0.280788	0.473294	1.62368	0.135971	0.999039	-4.46148	CA	no_hit
CUEDC1	Q9NWM3|Q9NWM3-2|J3QLQ8	CUE domain-containing protein 1 OS=Homo sapiens OX=9606 GN=CUEDC1 PE=1 SV=1|Isoform 2 of CUE domain-containing protein 1 OS=Homo sapiens OX=9606 GN=CUEDC1|CUE domain-containing protein 1 OS=Homo sapiens OX=9606 GN=CUEDC1 PE=1 SV=1|CUE domain-containing protein 1 OS=Homo sapiens OX=9606 GN=CUEDC1 PE=1 SV=1	47878.6|44112.6|33014.6	3	6.3877	-0.304585	0.234402	-1.62344	0.136023	0.999039	-4.46154	CA	no_hit
EBNA1BP2	H7C2Q8|Q99848	EBNA1 binding protein 2, isoform CRA_d OS=Homo sapiens OX=9606 GN=EBNA1BP2 PE=1 SV=1|Probable rRNA-processing protein EBP2 OS=Homo sapiens OX=9606 GN=EBNA1BP2 PE=1 SV=2	55127.9|48272.5	14	7.74798	-0.510226	-4.1083	-1.62329	0.136055	0.999039	-4.46158	CA	no_hit
LSM12	Q3MHD2|Q3MHD2-2	Protein LSM12 homolog OS=Homo sapiens OX=9606 GN=LSM12 PE=1 SV=2|Protein LSM12 homolog OS=Homo sapiens OX=9606 GN=LSM12 PE=1 SV=2|Isoform 2 of Protein LSM12 homolog OS=Homo sapiens OX=9606 GN=LSM12	27143.8|27137.7	7	7.76169	-0.52433	-0.512898	-1.62322	0.13607	0.999039	-4.4616	CA	no_hit
TJAP1	Q5JTD0|Q5JTD0-2|Q5JTD0-4	Tight junction-associated protein 1 OS=Homo sapiens OX=9606 GN=TJAP1 PE=1 SV=1|Isoform 2 of Tight junction-associated protein 1 OS=Homo sapiens OX=9606 GN=TJAP1|Isoform 4 of Tight junction-associated protein 1 OS=Homo sapiens OX=9606 GN=TJAP1	69122.3|68022.8|59263.9	4	6.44239	-0.28092	-0.0491054	-1.622	0.136333	0.999039	-4.46191	CA	no_hit
ALYREF	E9PB61|Q86V81	THO complex subunit 4 OS=Homo sapiens OX=9606 GN=ALYREF PE=1 SV=1|THO complex subunit 4 OS=Homo sapiens OX=9606 GN=ALYREF PE=1 SV=1|THO complex subunit 4 OS=Homo sapiens OX=9606 GN=ALYREF PE=1 SV=3	30887.2|30217.9	9	8.04536	-0.431321	-2.47077	-1.62177	0.136383	0.999039	-4.46197	CA	no_hit
CMTR1	Q8N1G2	Cap-specific mRNA (nucleoside-2'-O-)-methyltransferase 1 OS=Homo sapiens OX=9606 GN=CMTR1 PE=1 SV=1	115946	21	7.32276	0.202132	0.0198693	1.62146	0.13645	0.999039	-4.46205	CA	no_hit
PSMC6	A0A087X2I1|P62333	26S proteasome regulatory subunit 10B OS=Homo sapiens OX=9606 GN=PSMC6 PE=1 SV=1|26S proteasome regulatory subunit 10B OS=Homo sapiens OX=9606 GN=PSMC6 PE=1 SV=1	55179.4|53556.4	26	8.51937	0.250314	0.378669	1.62089	0.136571	0.999039	-4.4622	CA	no_hit
GOLIM4	O00461	Golgi integral membrane protein 4 OS=Homo sapiens OX=9606 GN=GOLIM4 PE=1 SV=1	94360.8	15	7.61564	0.338987	0.174625	1.62064	0.136626	0.999039	-4.46226	CA	no_hit
RAB9A	P51151	Ras-related protein Rab-9A OS=Homo sapiens OX=9606 GN=RAB9A PE=1 SV=1	26758.8	7	7.03632	0.202412	0.299566	1.62054	0.136647	0.999039	-4.46229	CA	no_hit
PSMD2	Q13200	26S proteasome non-ATPase regulatory subunit 2 OS=Homo sapiens OX=9606 GN=PSMD2 PE=1 SV=3	116392	38	8.5713	0.343601	0.205991	1.62043	0.13667	0.999039	-4.46232	CA	no_hit
TRAPPC1	Q9Y5R8	Trafficking protein particle complex subunit 1 OS=Homo sapiens OX=9606 GN=TRAPPC1 PE=1 SV=1	19672.5	4	7.23503	0.16959	0.161562	1.62041	0.136675	0.999039	-4.46232	CA	no_hit
GARS1	P41250	Glycine--tRNA ligase OS=Homo sapiens OX=9606 GN=GARS1 PE=1 SV=3	99672.7	27	8.54635	0.223632	0.280126	1.61941	0.13689	0.999039	-4.46258	CA	no_hit
POFUT2	Q9Y2G5	GDP-fucose protein O-fucosyltransferase 2 OS=Homo sapiens OX=9606 GN=POFUT2 PE=1 SV=3	56617.8	6	6.98701	0.194924	0.293057	1.61669	0.137481	0.999039	-4.46328	CA	no_hit
RPA2	P15927|P15927-2|P15927-3	Replication protein A 32 kDa subunit OS=Homo sapiens OX=9606 GN=RPA2 PE=1 SV=1|Isoform 2 of Replication protein A 32 kDa subunit OS=Homo sapiens OX=9606 GN=RPA2|Isoform 3 of Replication protein A 32 kDa subunit OS=Homo sapiens OX=9606 GN=RPA2	33601.4|34814.2|44432.3	7	7.6996	-0.245178	0.105915	-1.61639	0.137547	0.999039	-4.46335	CA	no_hit
FKBP15	Q5T1M5	FK506-binding protein 15 OS=Homo sapiens OX=9606 GN=FKBP15 PE=1 SV=2	157788	20	7.23771	-0.402397	-0.105408	-1.61577	0.13768	0.999039	-4.46351	CA	no_hit
SDAD1	Q9NVU7	Protein SDA1 homolog OS=Homo sapiens OX=9606 GN=SDAD1 PE=1 SV=3	104917	11	7.345	0.525949	-2.77658	1.61542	0.137756	0.999039	-4.4636	CA	no_hit
ABHD17B	Q5VST6	Alpha/beta hydrolase domain-containing protein 17B OS=Homo sapiens OX=9606 GN=ABHD17B PE=1 SV=1	36528.6	3	6.28287	0.2278	-0.199839	1.61413	0.138037	0.999039	-4.46393	CA	no_hit
ZADH2	Q8N4Q0	Prostaglandin reductase 3 OS=Homo sapiens OX=9606 GN=ZADH2 PE=1 SV=1	47149.4	4	6.56315	0.225607	0.317115	1.61409	0.138046	0.999039	-4.46394	CA	no_hit
GPRC5A	Q8NFJ5	Retinoic acid-induced protein 3 OS=Homo sapiens OX=9606 GN=GPRC5A PE=1 SV=2	45491.4	6	8.37594	0.292205	-2.15472	1.61322	0.138235	0.999039	-4.46416	CA	no_hit
G6PD	E7EUI8|P11413|P11413-2|P11413-3	Glucose-6-phosphate 1-dehydrogenase (Fragment) OS=Homo sapiens OX=9606 GN=G6PD PE=1 SV=8|Glucose-6-phosphate 1-dehydrogenase OS=Homo sapiens OX=9606 GN=G6PD PE=1 SV=4|Isoform Long of Glucose-6-phosphate 1-dehydrogenase OS=Homo sapiens OX=9606 GN=G6PD|Isoform 3 of Glucose-6-phosphate 1-dehydrogenase OS=Homo sapiens OX=9606 GN=G6PD	43578.8|68497.2|73121.5|71763.8	38	9.31074	0.24306	0.305264	1.61067	0.138793	0.999039	-4.46482	CA	no_hit
ALDH3A2	A0A5F9ZHN9|P51648|P51648-2	Aldehyde dehydrogenase OS=Homo sapiens OX=9606 GN=ALDH3A2 PE=1 SV=1|Aldehyde dehydrogenase family 3 member A2 OS=Homo sapiens OX=9606 GN=ALDH3A2 PE=1 SV=1|Isoform 2 of Aldehyde dehydrogenase family 3 member A2 OS=Homo sapiens OX=9606 GN=ALDH3A2	70469.8|66220.5|69953.0	14	8.50415	0.218399	0.0780955	1.6101	0.138917	0.999039	-4.46496	CA	no_hit
VPS35	Q96QK1	Vacuolar protein sorting-associated protein 35 OS=Homo sapiens OX=9606 GN=VPS35 PE=1 SV=2	106441	29	8.31452	0.250515	0.00175499	1.61009	0.138919	0.999039	-4.46496	CA	no_hit
RMC1	K7ENL9|Q96DM3	Regulator of MON1-CCZ1 complex OS=Homo sapiens OX=9606 GN=RMC1 PE=1 SV=1|Regulator of MON1-CCZ1 complex OS=Homo sapiens OX=9606 GN=RMC1 PE=1 SV=2	81779.4|88140.4	4	6.62971	0.194068	0.137735	1.6098	0.138983	0.999039	-4.46504	CA	no_hit
BCL9L	A0A087WZX0|Q86UU0|Q86UU0-2|Q86UU0-4	B-cell CLL/lymphoma 9-like protein OS=Homo sapiens OX=9606 GN=BCL9L PE=1 SV=1|B-cell CLL/lymphoma 9-like protein OS=Homo sapiens OX=9606 GN=BCL9L PE=1 SV=1|Isoform 2 of B-cell CLL/lymphoma 9-like protein OS=Homo sapiens OX=9606 GN=BCL9L|Isoform 4 of B-cell CLL/lymphoma 9-like protein OS=Homo sapiens OX=9606 GN=BCL9L	165193.0|169899.0|169299.0|165016.0	4	6.60564	-0.766845	-0.649403	-1.60728	0.139535	0.999039	-4.46568	CA	no_hit
OSBPL2	A0A087WTV1|A0A2R8Y362|A0A2R8Y5R1|A0A2R8Y690|A0A2R8YD49|A0A2R8YDU7|A0A2R8YEX0|A0A2R8YFT0|A0A2R8YG53|A0A2R8YG59|A0A2R8YG95|E7ET92|Q9H1P3|Q9H1P3-2	Oxysterol-binding protein-related protein 2 (Fragment) OS=Homo sapiens OX=9606 GN=OSBPL2 PE=1 SV=1|Oxysterol-binding protein (Fragment) OS=Homo sapiens OX=9606 GN=OSBPL2 PE=1 SV=1|Oxysterol-binding protein OS=Homo sapiens OX=9606 GN=OSBPL2 PE=1 SV=1|Oxysterol-binding protein OS=Homo sapiens OX=9606 GN=OSBPL2 PE=1 SV=1|Oxysterol-binding protein OS=Homo sapiens OX=9606 GN=OSBPL2 PE=1 SV=1|Oxysterol…	22896.7|58538.9|51152.2|39189.6|61683.5|53061.7|56900.9|31545.5|20861.7|50539.8|29204.2|49097.3|65414.1|64184.7	3	6.47727	0.288127	0.107373	1.60668	0.139668	0.999039	-4.46584	CA	no_hit
RRM2B	H0YAV1|Q7LG56|Q7LG56-6	Ribonucleoside-diphosphate reductase subunit M2 B (Fragment) OS=Homo sapiens OX=9606 GN=RRM2B PE=1 SV=1|Ribonucleoside-diphosphate reductase subunit M2 B OS=Homo sapiens OX=9606 GN=RRM2B PE=1 SV=1|Isoform 6 of Ribonucleoside-diphosphate reductase subunit M2 B OS=Homo sapiens OX=9606 GN=RRM2B	55527.4|47631.1|57235.4	7	7.4804	0.273538	0.132634	1.60485	0.14007	0.999039	-4.4663	CA	no_hit
GPKOW	Q92917	G-patch domain and KOW motifs-containing protein OS=Homo sapiens OX=9606 GN=GPKOW PE=1 SV=2	59725.6	15	7.46145	-0.267032	0.524303	-1.6037	0.140325	0.999039	-4.4666	CA	no_hit
BRD2	A0A0G2JK44|A0A140T9E9|H0Y6K2|P25440|P25440-2|P25440-3|P25440-4	Bromodomain-containing protein 2 OS=Homo sapiens OX=9606 GN=BRD2 PE=1 SV=1|Bromodomain-containing protein 2 (Fragment) OS=Homo sapiens OX=9606 GN=BRD2 PE=1 SV=1|Bromodomain-containing protein 2 (Fragment) OS=Homo sapiens OX=9606 GN=BRD2 PE=1 SV=1|Bromodomain-containing protein 2 OS=Homo sapiens OX=9606 GN=BRD2 PE=1 SV=2|Isoform 2 of Bromodomain-containing protein 2 OS=Homo sapiens OX=9606 GN=BRD2…	117601.0|113305.0|113271.0|113236.0|117568.0|107417.0|96719.0	5	6.96107	-0.422752	-0.702331	-1.60336	0.1404	0.999039	-4.46669	CA	no_hit
OFD1	O75665|O75665-3	Oral-facial-digital syndrome 1 protein OS=Homo sapiens OX=9606 GN=OFD1 PE=1 SV=1|Isoform 3 of Oral-facial-digital syndrome 1 protein OS=Homo sapiens OX=9606 GN=OFD1|Oral-facial-digital syndrome 1 protein OS=Homo sapiens OX=9606 GN=OFD1 PE=1 SV=1	146259.0|139206.0	5	6.34633	-0.294655	-0.737076	-1.60234	0.140627	0.999039	-4.46695	CA	no_hit
TARS1	P26639|P26639-2	Threonine--tRNA ligase 1, cytoplasmic OS=Homo sapiens OX=9606 GN=TARS1 PE=1 SV=3|Threonine--tRNA ligase 1, cytoplasmic OS=Homo sapiens OX=9606 GN=TARS1 PE=1 SV=3|Isoform 2 of Threonine--tRNA ligase 1, cytoplasmic OS=Homo sapiens OX=9606 GN=TARS1	102851.0|106636.0	32	8.7069	0.288056	0.166002	1.59954	0.141248	0.999039	-4.46766	CA	no_hit
MAGT1	A0A087WU53|Q9H0U3	Magnesium transporter protein 1 OS=Homo sapiens OX=9606 GN=MAGT1 PE=1 SV=1|Magnesium transporter protein 1 OS=Homo sapiens OX=9606 GN=MAGT1 PE=1 SV=1	47436.3|42973.7	7	7.9189	0.219585	0.0254685	1.59854	0.14147	0.999039	-4.46792	CA	no_hit
RAB14	P61106	Ras-related protein Rab-14 OS=Homo sapiens OX=9606 GN=RAB14 PE=1 SV=4	27760.5	10	8.34306	0.206457	0.286236	1.59644	0.141938	0.999039	-4.46845	CA	no_hit
NHSL1	Q5SYE7|Q5SYE7-2	NHS-like protein 1 OS=Homo sapiens OX=9606 GN=NHSL1 PE=1 SV=2|Isoform 2 of NHS-like protein 1 OS=Homo sapiens OX=9606 GN=NHSL1	192485.0|194366.0	4	6.30905	-0.198817	-0.188119	-1.59476	0.142314	0.999039	-4.46888	CA	no_hit
SEC13	P55735	Protein SEC13 homolog OS=Homo sapiens OX=9606 GN=SEC13 PE=1 SV=3	40898.6	8	8.18939	-0.29429	-0.36536	-1.59457	0.142357	0.999039	-4.46893	CA	no_hit
LONP1	K7EKE6	Lon protease homolog, mitochondrial OS=Homo sapiens OX=9606 GN=LONP1 PE=1 SV=1	114988	31	8.12382	0.240718	0.113695	1.59277	0.14276	0.999039	-4.46939	CA	no_hit
FLYWCH2	I3L1Y9|Q96CP2	FLYWCH family member 2 OS=Homo sapiens OX=9606 GN=FLYWCH2 PE=1 SV=1|FLYWCH family member 2 OS=Homo sapiens OX=9606 GN=FLYWCH2 PE=1 SV=1	18997.7|18319.1	2	6.81153	-0.792544	0.623263	-1.59241	0.14284	0.999039	-4.46948	CA	no_hit
SNRPD2	K7EJB5|P62316	Small nuclear ribonucleoprotein Sm D2 OS=Homo sapiens OX=9606 GN=SNRPD2 PE=1 SV=1|Small nuclear ribonucleoprotein Sm D2 OS=Homo sapiens OX=9606 GN=SNRPD2 PE=1 SV=1	9182.5|18803.8	9	8.30069	-0.511058	-0.455804	-1.59179	0.14298	0.999039	-4.46964	CA	no_hit
TRIM21	P19474	E3 ubiquitin-protein ligase TRIM21 OS=Homo sapiens OX=9606 GN=TRIM21 PE=1 SV=1	63375.1	11	7.23386	0.19953	0.334782	1.59127	0.143096	0.999039	-4.46977	CA	no_hit
SMYD2	Q9NRG4	N-lysine methyltransferase SMYD2 OS=Homo sapiens OX=9606 GN=SMYD2 PE=1 SV=2	61272.2	5	6.87849	0.228043	0.260454	1.5893	0.14354	0.999039	-4.47028	CA	no_hit
TAB1	Q15750	TGF-beta-activated kinase 1 and MAP3K7-binding protein 1 OS=Homo sapiens OX=9606 GN=TAB1 PE=1 SV=1	60067	7	6.86928	-0.18707	0.211148	-1.58787	0.143862	0.999039	-4.47064	CA	no_hit
NUP62	P37198	Nuclear pore glycoprotein p62 OS=Homo sapiens OX=9606 GN=NUP62 PE=1 SV=3	59173.5	8	7.54622	-0.363211	0.280143	-1.5876	0.143924	0.999039	-4.47071	CA	no_hit
DNAJC7	Q99615	DnaJ homolog subfamily C member 7 OS=Homo sapiens OX=9606 GN=DNAJC7 PE=1 SV=2	72717.5	29	8.12289	0.204539	0.345188	1.58739	0.14397	0.999039	-4.47076	CA	no_hit
STRBP	Q96SI9|Q96SI9-2	Spermatid perinuclear RNA-binding protein OS=Homo sapiens OX=9606 GN=STRBP PE=1 SV=1|Isoform 2 of Spermatid perinuclear RNA-binding protein OS=Homo sapiens OX=9606 GN=STRBP	92238.3|90553.5	12	7.50479	0.379269	-2.63884	1.58688	0.144087	0.999039	-4.47089	CA	no_hit
MAD1L1	Q9Y6D9	Mitotic spindle assembly checkpoint protein MAD1 OS=Homo sapiens OX=9606 GN=MAD1L1 PE=1 SV=2	96381.6	23	7.62155	0.203573	0.219697	1.58566	0.144363	0.999039	-4.47121	CA	no_hit
CCT3	P49368	T-complex protein 1 subunit gamma OS=Homo sapiens OX=9606 GN=CCT3 PE=1 SV=4	72017	36	8.80367	0.268613	0.180082	1.58423	0.144688	0.999039	-4.47157	CA	no_hit
PSME4	Q14997	Proteasome activator complex subunit 4 OS=Homo sapiens OX=9606 GN=PSME4 PE=1 SV=2	246695	23	7.48616	0.295654	0.170696	1.58382	0.14478	0.999039	-4.47167	CA	no_hit
ASDURF	L0R819	ASNSD1 upstream open reading frame protein OS=Homo sapiens OX=9606 GN=ASDURF PE=1 SV=1	15501.8	5	6.55828	-0.798291	1.35534	-1.58313	0.144938	0.999039	-4.47185	CA	no_hit
GCFC2	P16383|P16383-2	GC-rich sequence DNA-binding factor 2 OS=Homo sapiens OX=9606 GN=GCFC2 PE=1 SV=2|Isoform 2 of GC-rich sequence DNA-binding factor 2 OS=Homo sapiens OX=9606 GN=GCFC2	108760.0|103617.0	5	6.54579	0.236323	0.0527159	1.58281	0.14501	0.999039	-4.47193	CA	no_hit
BICD1	A8MVZ6|Q96G01|Q96G01-3|Q96G01-4	BICD1 protein OS=Homo sapiens OX=9606 GN=BICD1 PE=1 SV=3|Protein bicaudal D homolog 1 OS=Homo sapiens OX=9606 GN=BICD1 PE=1 SV=3|Isoform 3 of Protein bicaudal D homolog 1 OS=Homo sapiens OX=9606 GN=BICD1|Isoform 4 of Protein bicaudal D homolog 1 OS=Homo sapiens OX=9606 GN=BICD1	117871.0|135588.0|123211.0|118724.0	3	6.16541	-0.346219	0.438359	-1.5796	0.145741	0.999039	-4.47275	CA	no_hit
MYH14	Q7Z406-2|Q7Z406-6	Isoform 2 of Myosin-14 OS=Homo sapiens OX=9606 GN=MYH14|Isoform 6 of Myosin-14 OS=Homo sapiens OX=9606 GN=MYH14	266055.0|262654.0	47	7.40424	0.423806	-0.226578	1.57923	0.145827	0.999039	-4.47284	CA	no_hit
PNKD	Q8N490-2|Q8N490-4	Isoform 2 of Probable hydrolase PNKD OS=Homo sapiens OX=9606 GN=PNKD|Isoform 4 of Probable hydrolase PNKD OS=Homo sapiens OX=9606 GN=PNKD	18486.2|40932.2	2	6.89372	-0.248303	-0.0346953	-1.57916	0.145842	0.999039	-4.47286	CA	no_hit
MPDZ	F5H1U9|O75970|O75970-2|O75970-3|O75970-5	Multiple PDZ domain protein OS=Homo sapiens OX=9606 GN=MPDZ PE=1 SV=1|Multiple PDZ domain protein OS=Homo sapiens OX=9606 GN=MPDZ PE=1 SV=2|Isoform 2 of Multiple PDZ domain protein OS=Homo sapiens OX=9606 GN=MPDZ|Isoform 3 of Multiple PDZ domain protein OS=Homo sapiens OX=9606 GN=MPDZ|Isoform 4 of Multiple PDZ domain protein OS=Homo sapiens OX=9606 GN=MPDZ	254112.0|252604.0|249135.0|247991.0|244521.0	19	8.03224	-0.370127	-0.573198	-1.57862	0.145966	0.999039	-4.473	CA	no_hit
PAWR	Q96IZ0	PRKC apoptosis WT1 regulator protein OS=Homo sapiens OX=9606 GN=PAWR PE=1 SV=1	43960.5	7	7.70301	-0.494383	0.423141	-1.5774	0.146245	0.999039	-4.47331	CA	no_hit
TAF5	Q15542|Q15542-2	Transcription initiation factor TFIID subunit 5 OS=Homo sapiens OX=9606 GN=TAF5 PE=1 SV=3|Isoform Short of Transcription initiation factor TFIID subunit 5 OS=Homo sapiens OX=9606 GN=TAF5	100675.0|93995.4	5	6.54152	-0.435416	-0.987348	-1.57671	0.146403	0.999039	-4.47348	CA	no_hit
AVEN	Q9NQS1	Cell death regulator Aven OS=Homo sapiens OX=9606 GN=AVEN PE=1 SV=1	44186.7	8	7.2319	-0.298233	0.356886	-1.57635	0.146487	0.999039	-4.47358	CA	no_hit
MVK	F5H8H2|Q03426	Mevalonate kinase OS=Homo sapiens OX=9606 GN=MVK PE=1 SV=1|Mevalonate kinase OS=Homo sapiens OX=9606 GN=MVK PE=1 SV=1	42415.1|48166.0	5	7.27229	0.21177	0.360754	1.57578	0.146618	0.999039	-4.47372	CA	no_hit
EMC8	O43402	ER membrane protein complex subunit 8 OS=Homo sapiens OX=9606 GN=EMC8 PE=1 SV=1	27560.1	8	7.82297	0.190213	0.270447	1.57552	0.146676	0.999039	-4.47379	CA	no_hit
CRYZL1	O95825	Quinone oxidoreductase-like protein 1 OS=Homo sapiens OX=9606 GN=CRYZL1 PE=1 SV=2	46980.6	9	6.99155	0.234081	0.273299	1.57461	0.146887	0.999039	-4.47402	CA	no_hit
AKT2	P31751	RAC-beta serine/threonine-protein kinase OS=Homo sapiens OX=9606 GN=AKT2 PE=1 SV=2	65562.7	15	7.73288	0.238339	0.116068	1.57454	0.146902	0.999039	-4.47404	CA	no_hit
DDA1	Q9BW61	DET1- and DDB1-associated protein 1 OS=Homo sapiens OX=9606 GN=DDA1 PE=1 SV=1	14622.8	4	7.01257	-0.707993	0.956176	-1.57194	0.147501	0.999039	-4.4747	CA	no_hit
SEC23IP	Q9Y6Y8	SEC23-interacting protein OS=Homo sapiens OX=9606 GN=SEC23IP PE=1 SV=1	129031	30	8.08835	-0.361499	-0.100237	-1.57192	0.147505	0.999039	-4.4747	CA	no_hit
ARL8A	Q96BM9	ADP-ribosylation factor-like protein 8A OS=Homo sapiens OX=9606 GN=ARL8A PE=1 SV=1	26497.4	4	6.92047	0.199338	0.162798	1.57178	0.147539	0.999039	-4.47474	CA	no_hit
LYN	P07948|P07948-2	Tyrosine-protein kinase Lyn OS=Homo sapiens OX=9606 GN=LYN PE=1 SV=3|Isoform 2 of Tyrosine-protein kinase Lyn OS=Homo sapiens OX=9606 GN=LYN	72986.5|70143.0	12	7.39335	0.208604	-0.332862	1.57146	0.147612	0.999039	-4.47482	CA	no_hit
PSMD1	Q99460|A0A087WW66	26S proteasome non-ATPase regulatory subunit 1 OS=Homo sapiens OX=9606 GN=PSMD1 PE=1 SV=2|26S proteasome non-ATPase regulatory subunit 1 OS=Homo sapiens OX=9606 GN=PSMD1 PE=1 SV=1|26S proteasome non-ATPase regulatory subunit 1 OS=Homo sapiens OX=9606 GN=PSMD1 PE=1 SV=2	128090.0|128409.0	33	8.42008	0.306144	0.192627	1.57138	0.14763	0.999039	-4.47484	CA	no_hit
NSF	P46459|P46459-2	Vesicle-fusing ATPase OS=Homo sapiens OX=9606 GN=NSF PE=1 SV=3|Isoform 2 of Vesicle-fusing ATPase OS=Homo sapiens OX=9606 GN=NSF	100699.0|88003.7	34	8.23974	0.242222	0.292931	1.57103	0.147711	0.999039	-4.47493	CA	no_hit
TMEM33	D6RAA6|P57088	Transmembrane protein 33 (Fragment) OS=Homo sapiens OX=9606 GN=TMEM33 PE=1 SV=1|Transmembrane protein 33 OS=Homo sapiens OX=9606 GN=TMEM33 PE=1 SV=2	27260.6|30127.2	6	8.04214	-0.324355	0.301148	-1.57048	0.14784	0.999039	-4.47507	CA	no_hit
PNPLA2	Q96AD5	Patatin-like phospholipase domain-containing protein 2 OS=Homo sapiens OX=9606 GN=PNPLA2 PE=1 SV=1	60528.1	2	6.13528	0.207873	0.149082	1.57026	0.147891	0.999039	-4.47513	CA	no_hit
EHD1	Q9H4M9	EH domain-containing protein 1 OS=Homo sapiens OX=9606 GN=EHD1 PE=1 SV=2	74030.8	17	8.14026	0.33775	0.0544061	1.57023	0.147897	0.999039	-4.47513	CA	no_hit
PCIF1	Q9H4Z3	mRNA (2'-O-methyladenosine-N(6)-)-methyltransferase OS=Homo sapiens OX=9606 GN=PCIF1 PE=1 SV=1	91873.8	10	6.90517	0.201978	0.00500645	1.56952	0.148062	0.999039	-4.47531	CA	no_hit
RAVER1	A0A087WZ13|E9PAU2|Q8IY67-2	Ribonucleoprotein PTB-binding 1 OS=Homo sapiens OX=9606 GN=RAVER1 PE=1 SV=1|Ribonucleoprotein PTB-binding 1 OS=Homo sapiens OX=9606 GN=RAVER1 PE=1 SV=1|Ribonucleoprotein PTB-binding 1 OS=Homo sapiens OX=9606 GN=RAVER1 PE=1 SV=1|Ribonucleoprotein PTB-binding 1 OS=Homo sapiens OX=9606 GN=RAVER1 PE=1 SV=1|Isoform 2 of Ribonucleoprotein PTB-binding 1 OS=Homo sapiens OX=9606 GN=RAVER1	87130.5|89168.6|87146.5	8	7.07471	-0.347219	0.559552	-1.5689	0.148205	0.999039	-4.47547	CA	no_hit
CUL2	A0A0A0MTN0|Q13617|Q13617-2	Cullin-2 OS=Homo sapiens OX=9606 GN=CUL2 PE=1 SV=1|Cullin-2 OS=Homo sapiens OX=9606 GN=CUL2 PE=1 SV=2|Isoform 2 of Cullin-2 OS=Homo sapiens OX=9606 GN=CUL2	107689.0|105806.0|108371.0	21	7.7565	0.27033	0.0557575	1.56866	0.14826	0.999039	-4.47553	CA	no_hit
PUM1	Q14671-2|Q14671-3|Q5T1Z4|Q5T1Z8	Isoform 2 of Pumilio homolog 1 OS=Homo sapiens OX=9606 GN=PUM1|Isoform 3 of Pumilio homolog 1 OS=Homo sapiens OX=9606 GN=PUM1|Pumilio homolog 1 OS=Homo sapiens OX=9606 GN=PUM1 PE=1 SV=1|Pumilio homolog 1 OS=Homo sapiens OX=9606 GN=PUM1 PE=1 SV=1	137499.0|139764.0|139835.0|143546.0	9	7.00343	-0.361702	-0.677946	-1.56862	0.148269	0.999039	-4.47554	CA	no_hit
CUL5	Q93034	Cullin-5 OS=Homo sapiens OX=9606 GN=CUL5 PE=1 SV=4	114283	20	7.41252	0.239772	-0.0576141	1.56836	0.148331	0.999039	-4.47561	CA	no_hit
FARSA	Q9Y285	Phenylalanine--tRNA ligase alpha subunit OS=Homo sapiens OX=9606 GN=FARSA PE=1 SV=3	66102.3	18	8.1595	0.261199	-0.308985	1.56774	0.148473	0.999039	-4.47577	CA	no_hit
PTPN3	J3KN34|P26045|P26045-2|P26045-3	Tyrosine-protein phosphatase non-receptor type OS=Homo sapiens OX=9606 GN=PTPN3 PE=1 SV=2|Tyrosine-protein phosphatase non-receptor type 3 OS=Homo sapiens OX=9606 GN=PTPN3 PE=1 SV=2|Isoform 2 of Tyrosine-protein phosphatase non-receptor type 3 OS=Homo sapiens OX=9606 GN=PTPN3|Isoform 3 of Tyrosine-protein phosphatase non-receptor type 3 OS=Homo sapiens OX=9606 GN=PTPN3	111248.0|120275.0|102257.0|96198.6	2	6.33792	0.349773	-0.432848	1.56731	0.148573	0.999039	-4.47587	CA	no_hit
LZTR1	Q8N653	Leucine-zipper-like transcriptional regulator 1 OS=Homo sapiens OX=9606 GN=LZTR1 PE=1 SV=2	107168	2	6.80334	0.219975	0.14354	1.56639	0.148789	0.999039	-4.47611	CA	no_hit
MEAK7	Q6P9B6	MTOR-associated protein MEAK7 OS=Homo sapiens OX=9606 GN=MEAK7 PE=1 SV=2	57976.7	7	7.41995	0.205529	0.179432	1.56638	0.148791	0.999039	-4.47611	CA	no_hit
VASP	P50552	Vasodilator-stimulated phosphoprotein OS=Homo sapiens OX=9606 GN=VASP PE=1 SV=3	46060.3	15	7.99491	-0.488176	0.236083	-1.5658	0.148927	0.999039	-4.47626	CA	no_hit
PCYT2	Q99447|Q99447-3	Ethanolamine-phosphate cytidylyltransferase OS=Homo sapiens OX=9606 GN=PCYT2 PE=1 SV=1|Isoform 3 of Ethanolamine-phosphate cytidylyltransferase OS=Homo sapiens OX=9606 GN=PCYT2	50348.2|52191.1	9	7.06611	0.201282	0.254287	1.56566	0.148958	0.999039	-4.47629	CA	no_hit
NT5C3B	Q969T7|C9J758	7-methylguanosine phosphate-specific 5'-nucleotidase OS=Homo sapiens OX=9606 GN=NT5C3B PE=1 SV=4|7-methylguanosine phosphate-specific 5'-nucleotidase (Fragment) OS=Homo sapiens OX=9606 GN=NT5C3B PE=1 SV=2|7-methylguanosine phosphate-specific 5'-nucleotidase OS=Homo sapiens OX=9606 GN=NT5C3B PE=1 SV=4	40128.2|30192.0	5	6.76499	0.267206	0.324923	1.56468	0.149186	0.999039	-4.47654	CA	no_hit
HNRNPL	A0A3B3ITJ4|P14866	Heterogeneous nuclear ribonucleoprotein L (Fragment) OS=Homo sapiens OX=9606 GN=HNRNPL PE=1 SV=1|Heterogeneous nuclear ribonucleoprotein L OS=Homo sapiens OX=9606 GN=HNRNPL PE=1 SV=2	67831.6|73541.6	19	8.71936	0.368059	-2.32293	1.56431	0.149273	0.999039	-4.47664	CA	no_hit
PDHA1	P08559|P08559-2|P08559-3|P08559-4	Pyruvate dehydrogenase E1 component subunit alpha, somatic form, mitochondrial OS=Homo sapiens OX=9606 GN=PDHA1 PE=1 SV=3|Isoform 2 of Pyruvate dehydrogenase E1 component subunit alpha, somatic form, mitochondrial OS=Homo sapiens OX=9606 GN=PDHA1|Isoform 3 of Pyruvate dehydrogenase E1 component subunit alpha, somatic form, mitochondrial OS=Homo sapiens OX=9606 GN=PDHA1|Isoform 4 of Pyruvate dehyd…	50948.6|51761.1|47120.6|56199.6	17	8.3423	0.241814	0.5363	1.56284	0.149617	0.999039	-4.47701	CA	no_hit
MYH9	P35579|P35579-2	Myosin-9 OS=Homo sapiens OX=9606 GN=MYH9 PE=1 SV=4|Myosin-9 OS=Homo sapiens OX=9606 GN=MYH9 PE=1 SV=4|Isoform 2 of Myosin-9 OS=Homo sapiens OX=9606 GN=MYH9	290617.0|201554.0	102	9.08635	0.341014	0.0418814	1.5626	0.149674	0.999039	-4.47707	CA	no_hit
DSG1	Q02413	Desmoglein-1 OS=Homo sapiens OX=9606 GN=DSG1 PE=1 SV=2	125045	19	7.28497	2.5482	0.200892	1.56226	0.149753	0.999039	-4.47716	CA	no_hit
SRP14	P37108|H0YLA2	Signal recognition particle 14 kDa protein OS=Homo sapiens OX=9606 GN=SRP14 PE=1 SV=2|Signal recognition particle 14 kDa protein OS=Homo sapiens OX=9606 GN=SRP14 PE=1 SV=1|Signal recognition particle 14 kDa protein OS=Homo sapiens OX=9606 GN=SRP14 PE=1 SV=2	20759.0|17232.6	6	8.03894	-0.468126	-0.603096	-1.56202	0.149809	0.999039	-4.47722	CA	no_hit
STRA6	J3KQI6|Q9BX79|Q9BX79-4|Q9BX79-5|Q9BX79-6	Receptor for retinol uptake STRA6 OS=Homo sapiens OX=9606 GN=STRA6 PE=1 SV=1|Receptor for retinol uptake STRA6 OS=Homo sapiens OX=9606 GN=STRA6 PE=1 SV=1|Isoform 4 of Receptor for retinol uptake STRA6 OS=Homo sapiens OX=9606 GN=STRA6|Isoform 5 of Receptor for retinol uptake STRA6 OS=Homo sapiens OX=9606 GN=STRA6|Isoform 6 of Receptor for retinol uptake STRA6 OS=Homo sapiens OX=9606 GN=STRA6	77962.7|79121.3|84281.2|83841.8|81113.3	4	7.11128	0.188068	0.17711	1.56135	0.149966	0.999039	-4.47739	CA	no_hit
NRBP1	F8W6G1|Q9UHY1	Nuclear receptor-binding protein OS=Homo sapiens OX=9606 GN=NRBP1 PE=1 SV=1|Nuclear receptor-binding protein OS=Homo sapiens OX=9606 GN=NRBP1 PE=1 SV=1|Nuclear receptor-binding protein OS=Homo sapiens OX=9606 GN=NRBP1 PE=1 SV=1	70488.1|69503.6	6	6.89672	-0.398819	0.00237661	-1.56013	0.150251	0.999039	-4.4777	CA	no_hit
SSR3	C9JA28|Q9UNL2|Q9UNL2-2	Translocon-associated protein subunit gamma OS=Homo sapiens OX=9606 GN=SSR3 PE=1 SV=1|Translocon-associated protein subunit gamma OS=Homo sapiens OX=9606 GN=SSR3 PE=1 SV=1|Isoform 2 of Translocon-associated protein subunit gamma OS=Homo sapiens OX=9606 GN=SSR3	25072.9|26238.7|28432.9	5	8.37719	0.241962	-0.000768598	1.55921	0.150467	0.999039	-4.47793	CA	no_hit
ATP6AP1	Q15904	V-type proton ATPase subunit S1 OS=Homo sapiens OX=9606 GN=ATP6AP1 PE=1 SV=2	55814.1	8	7.52517	0.203303	0.0919003	1.55782	0.150796	0.999039	-4.47829	CA	no_hit
SPAST	A0A2R8Y481|A0A2R8Y4I8|A0A2R8YGN6|A0A2U3TZR0|Q9UBP0|Q9UBP0-2|Q9UBP0-3|Q9UBP0-4|A0A2R8Y7K2	Spastin (Fragment) OS=Homo sapiens OX=9606 GN=SPAST PE=1 SV=1|Spastin OS=Homo sapiens OX=9606 GN=SPAST PE=1 SV=1|Spastin (Fragment) OS=Homo sapiens OX=9606 GN=SPAST PE=1 SV=1|Spastin OS=Homo sapiens OX=9606 GN=SPAST PE=1 SV=1|Spastin OS=Homo sapiens OX=9606 GN=SPAST PE=1 SV=1|Isoform 2 of Spastin OS=Homo sapiens OX=9606 GN=SPAST|Isoform 3 of Spastin OS=Homo sapiens OX=9606 GN=SPAST|Isoform 4 of S…	60870.4|76861.5|70771.8|81115.6|81186.7|76932.5|70673.9|66419.8|45814.4	6	6.8425	-0.294479	0.340388	-1.55588	0.151252	0.999039	-4.47878	CA	no_hit
CAMSAP3	Q9P1Y5|Q9P1Y5-2	Calmodulin-regulated spectrin-associated protein 3 OS=Homo sapiens OX=9606 GN=CAMSAP3 PE=1 SV=2|Calmodulin-regulated spectrin-associated protein 3 OS=Homo sapiens OX=9606 GN=CAMSAP3 PE=1 SV=2|Isoform 2 of Calmodulin-regulated spectrin-associated protein 3 OS=Homo sapiens OX=9606 GN=CAMSAP3	152804.0|156958.0	2	6.40345	-0.300173	-0.172181	-1.55577	0.151279	0.999039	-4.47881	CA	no_hit
AFAP1L2	Q8N4X5|Q8N4X5-2|Q8N4X5-4	Actin filament-associated protein 1-like 2 OS=Homo sapiens OX=9606 GN=AFAP1L2 PE=1 SV=1|Isoform 2 of Actin filament-associated protein 1-like 2 OS=Homo sapiens OX=9606 GN=AFAP1L2|Isoform 4 of Actin filament-associated protein 1-like 2 OS=Homo sapiens OX=9606 GN=AFAP1L2	114058.0|113619.0|116651.0	4	6.38795	-0.396912	-0.85831	-1.55458	0.151561	0.999039	-4.47911	CA	no_hit
MPHOSPH8	Q99549|Q99549-2	M-phase phosphoprotein 8 OS=Homo sapiens OX=9606 GN=MPHOSPH8 PE=1 SV=2|Isoform 2 of M-phase phosphoprotein 8 OS=Homo sapiens OX=9606 GN=MPHOSPH8	129578.0|129423.0	8	6.91227	-0.304141	-2.78342	-1.55427	0.151634	0.999039	-4.47919	CA	no_hit
STAT3	P40763|P40763-3	Signal transducer and activator of transcription 3 OS=Homo sapiens OX=9606 GN=STAT3 PE=1 SV=2|Isoform 3 of Signal transducer and activator of transcription 3 OS=Homo sapiens OX=9606 GN=STAT3	103107.0|98359.5	23	7.83356	0.184546	0.0901699	1.5538	0.151745	0.999039	-4.47931	CA	no_hit
VPS35L	H3BNX2|Q7Z3J2|C9J7I2	VPS35 endosomal protein sorting factor-like OS=Homo sapiens OX=9606 GN=VPS35L PE=1 SV=2|VPS35 endosomal protein sorting factor-like OS=Homo sapiens OX=9606 GN=VPS35L PE=1 SV=2|VPS35 endosomal protein sorting factor-like OS=Homo sapiens OX=9606 GN=VPS35L PE=1 SV=2|VPS35 endosomal protein sorting factor-like OS=Homo sapiens OX=9606 GN=VPS35L PE=1 SV=2|VPS35 endosomal protein sorting factor-like OS=…	22300.8|130938.0|111053.0	18	7.27982	0.262086	0.0957929	1.55364	0.151782	0.999039	-4.47934	CA	no_hit
ASNS	P08243|P08243-2	Asparagine synthetase [glutamine-hydrolyzing] OS=Homo sapiens OX=9606 GN=ASNS PE=1 SV=4|Isoform 2 of Asparagine synthetase [glutamine-hydrolyzing] OS=Homo sapiens OX=9606 GN=ASNS	76762.9|74391.9	21	8.20727	0.211624	0.0207148	1.55278	0.151987	0.999039	-4.47956	CA	no_hit
PYGB	P11216	Glycogen phosphorylase, brain form OS=Homo sapiens OX=9606 GN=PYGB PE=1 SV=5	114354	38	8.7316	0.269922	0.00321372	1.55183	0.152212	0.999039	-4.4798	CA	no_hit
ZFYVE27	Q5T4F4|Q5T4F4-2|Q5T4F4-3|Q5T4F4-5|Q5T4F4-8	Protrudin OS=Homo sapiens OX=9606 GN=ZFYVE27 PE=1 SV=1|Isoform 2 of Protrudin OS=Homo sapiens OX=9606 GN=ZFYVE27|Isoform 3 of Protrudin OS=Homo sapiens OX=9606 GN=ZFYVE27|Isoform 5 of Protrudin OS=Homo sapiens OX=9606 GN=ZFYVE27|Isoform 8 of Protrudin OS=Homo sapiens OX=9606 GN=ZFYVE27	51707.4|50916.0|52209.7|40296.4|47170.0	4	6.63435	0.304281	0.34068	1.55172	0.152237	0.999039	-4.47983	CA	no_hit
UBE3A	A0A0D9SG77|A0A1B0GVL3|Q05086|Q05086-2|Q05086-3	Ubiquitin-protein ligase E3A OS=Homo sapiens OX=9606 GN=UBE3A PE=1 SV=1|Ubiquitin-protein ligase E3A OS=Homo sapiens OX=9606 GN=UBE3A PE=1 SV=1|Ubiquitin-protein ligase E3A OS=Homo sapiens OX=9606 GN=UBE3A PE=1 SV=4|Isoform I of Ubiquitin-protein ligase E3A OS=Homo sapiens OX=9606 GN=UBE3A|Isoform III of Ubiquitin-protein ligase E3A OS=Homo sapiens OX=9606 GN=UBE3A|Ubiquitin-protein ligase E3A OS…	105309.0|111984.0|121366.0|117983.0|120477.0	20	7.532	0.255613	0.141824	1.55164	0.152257	0.999039	-4.47985	CA	no_hit
CC2D1A	Q6P1N0|Q6P1N0-2	Coiled-coil and C2 domain-containing protein 1A OS=Homo sapiens OX=9606 GN=CC2D1A PE=1 SV=1|Isoform 2 of Coiled-coil and C2 domain-containing protein 1A OS=Homo sapiens OX=9606 GN=CC2D1A	121737.0|121609.0	20	7.14389	-0.328557	0.0710559	-1.54811	0.153098	0.999039	-4.48075	CA	no_hit
SERPINB12	Q96P63|Q96P63-2	Serpin B12 OS=Homo sapiens OX=9606 GN=SERPINB12 PE=1 SV=1|Isoform 2 of Serpin B12 OS=Homo sapiens OX=9606 GN=SERPINB12	55468.2|58244.8	7	6.86515	2.58985	0.166299	1.54664	0.153449	0.999039	-4.48112	CA	no_hit
SLC25A35	Q3KQZ1|Q3KQZ1-2	Solute carrier family 25 member 35 OS=Homo sapiens OX=9606 GN=SLC25A35 PE=2 SV=1|Isoform 2 of Solute carrier family 25 member 35 OS=Homo sapiens OX=9606 GN=SLC25A35|Solute carrier family 25 member 35 OS=Homo sapiens OX=9606 GN=SLC25A35 PE=2 SV=1	35990.9|34593.0	3	6.5176	0.237062	0.074402	1.54659	0.153461	0.999039	-4.48113	CA	no_hit
CCNA2	P20248	Cyclin-A2 OS=Homo sapiens OX=9606 GN=CCNA2 PE=1 SV=2	58121.6	4	6.26797	-0.316227	0.332876	-1.54468	0.153919	0.999039	-4.48162	CA	no_hit
GLMN	Q92990	Glomulin OS=Homo sapiens OX=9606 GN=GLMN PE=1 SV=2	83203.6	6	7.19731	0.247991	0.0760498	1.54192	0.15458	0.999039	-4.48231	CA	no_hit
NT5C2	P49902|Q5JUV4	Cytosolic purine 5'-nucleotidase OS=Homo sapiens OX=9606 GN=NT5C2 PE=1 SV=1|Cytosolic purine 5'-nucleotidase (Fragment) OS=Homo sapiens OX=9606 GN=NT5C2 PE=1 SV=1	76335.9|36941.4	14	8.06723	0.240548	0.155955	1.53882	0.15533	0.999039	-4.4831	CA	no_hit
MED25	B9TX31|M0QZQ2|Q71SY5|Q71SY5-2|Q71SY5-3|Q71SY5-4|Q71SY5-5|Q71SY5-6	Mediator complex subunit MED25 variant MED25_i4 OS=Homo sapiens OX=9606 GN=MED25 PE=1 SV=1|Mediator of RNA polymerase II transcription subunit 25 OS=Homo sapiens OX=9606 GN=MED25 PE=1 SV=3|Mediator of RNA polymerase II transcription subunit 25 OS=Homo sapiens OX=9606 GN=MED25 PE=1 SV=2|Isoform 2 of Mediator of RNA polymerase II transcription subunit 25 OS=Homo sapiens OX=9606 GN=MED25|Isoform 3 o…	55061.4|95863.3|85631.4|87369.1|91627.4|94697.6|83973.5|60763.4	2	6.79579	-0.761224	-0.422088	-1.53874	0.155348	0.999039	-4.48312	CA	no_hit
ABHD16A	A0A0G2JJD3|O95870|O95870-2	HLA-B associated transcript 5, isoform CRA_b OS=Homo sapiens OX=9606 GN=ABHD16A PE=1 SV=1|Phosphatidylserine lipase ABHD16A OS=Homo sapiens OX=9606 GN=ABHD16A PE=1 SV=3|Isoform 2 of Phosphatidylserine lipase ABHD16A OS=Homo sapiens OX=9606 GN=ABHD16A	72970.9|68697.6|63622.8	9	7.23385	0.228216	0.153685	1.53835	0.155442	0.999039	-4.48322	CA	no_hit
RSPRY1	Q96DX4	RING finger and SPRY domain-containing protein 1 OS=Homo sapiens OX=9606 GN=RSPRY1 PE=1 SV=1	73055.6	5	6.74673	-0.21999	-0.0868768	-1.53792	0.155548	0.999039	-4.48333	CA	no_hit
H1-2	P16403	Histone H1.2 OS=Homo sapiens OX=9606 GN=H1-2 PE=1 SV=2	39300	6	8.33812	-0.806717	-5.05202	-1.53754	0.155639	0.999039	-4.48342	CA	no_hit
PSMD13	Q9UNM6	26S proteasome non-ATPase regulatory subunit 13 OS=Homo sapiens OX=9606 GN=PSMD13 PE=1 SV=2	50200	19	8.5464	0.289579	0.18253	1.53651	0.155887	0.999039	-4.48368	CA	no_hit
SAR1A	Q9NR31	GTP-binding protein SAR1a OS=Homo sapiens OX=9606 GN=SAR1A PE=1 SV=1	26117.1	4	8.0523	0.26119	0.127916	1.53647	0.155898	0.999039	-4.48369	CA	no_hit
CLTB	P09497-2	Isoform Non-brain of Clathrin light chain B OS=Homo sapiens OX=9606 GN=CLTB	27844.3	8	7.79504	-0.675504	0.498212	-1.53467	0.156335	0.999039	-4.48415	CA	no_hit
KPNB1	Q14974	Importin subunit beta-1 OS=Homo sapiens OX=9606 GN=KPNB1 PE=1 SV=2	111500	32	8.71621	0.224079	0.0873107	1.53428	0.156431	0.999039	-4.48425	CA	no_hit
EXOC5	O00471|A0A0A0MSI8	Exocyst complex component 5 OS=Homo sapiens OX=9606 GN=EXOC5 PE=1 SV=1|Exocyst complex component 5 OS=Homo sapiens OX=9606 GN=EXOC5 PE=1 SV=1|Exocyst complex component 5 OS=Homo sapiens OX=9606 GN=EXOC5 PE=1 SV=1	99558.5|100129.0	22	7.58158	0.272409	-0.0759317	1.53371	0.156569	0.999039	-4.48439	CA	no_hit
SCFD2	Q8WU76|Q8WU76-2|A0A087WUD7	Sec1 family domain-containing protein 2 OS=Homo sapiens OX=9606 GN=SCFD2 PE=1 SV=2|Isoform 2 of Sec1 family domain-containing protein 2 OS=Homo sapiens OX=9606 GN=SCFD2|Sec1 family domain-containing protein 2 OS=Homo sapiens OX=9606 GN=SCFD2 PE=1 SV=1|Sec1 family domain-containing protein 2 OS=Homo sapiens OX=9606 GN=SCFD2 PE=1 SV=2|Isoform 2 of Sec1 family domain-containing protein 2 OS=Homo sap…	87437.3|81088.9|54578.1	5	7.27438	0.225856	0.106821	1.5337	0.15657	0.999039	-4.48439	CA	no_hit
VPS36	A0A3B3ISW7|Q86VN1	Vacuolar protein-sorting-associated protein 36 OS=Homo sapiens OX=9606 GN=VPS36 PE=1 SV=1|Vacuolar protein-sorting-associated protein 36 OS=Homo sapiens OX=9606 GN=VPS36 PE=1 SV=1|Vacuolar protein-sorting-associated protein 36 OS=Homo sapiens OX=9606 GN=VPS36 PE=1 SV=1	44922.7|52895.9	9	7.2824	0.242994	0.203775	1.53293	0.156757	0.999039	-4.48458	CA	no_hit
INPP5A	Q14642|Q5T1B5	Inositol polyphosphate-5-phosphatase A OS=Homo sapiens OX=9606 GN=INPP5A PE=1 SV=1|Inositol polyphosphate-5-phosphatase A OS=Homo sapiens OX=9606 GN=INPP5A PE=1 SV=1	58397.8|54196.4	6	6.84861	0.213998	-0.14899	1.53239	0.15689	0.999039	-4.48472	CA	no_hit
GBA2	Q9HCG7|Q9HCG7-2	Non-lysosomal glucosylceramidase OS=Homo sapiens OX=9606 GN=GBA2 PE=1 SV=2|Isoform 2 of Non-lysosomal glucosylceramidase OS=Homo sapiens OX=9606 GN=GBA2|Non-lysosomal glucosylceramidase OS=Homo sapiens OX=9606 GN=GBA2 PE=1 SV=2	115019.0|107894.0	5	6.72838	0.207902	0.23386	1.53236	0.156897	0.999039	-4.48473	CA	no_hit
TRAP1	Q12931|Q12931-2|I3L0K7	Heat shock protein 75 kDa, mitochondrial OS=Homo sapiens OX=9606 GN=TRAP1 PE=1 SV=3|Isoform 2 of Heat shock protein 75 kDa, mitochondrial OS=Homo sapiens OX=9606 GN=TRAP1|Heat shock protein 75 kDa, mitochondrial OS=Homo sapiens OX=9606 GN=TRAP1 PE=1 SV=1|Heat shock protein 75 kDa, mitochondrial OS=Homo sapiens OX=9606 GN=TRAP1 PE=1 SV=3|Isoform 2 of Heat shock protein 75 kDa, mitochondrial OS=Hom…	93729.9|87225.4|67450.5	30	8.74974	0.279142	0.0839997	1.5316	0.157084	0.999039	-4.48492	CA	no_hit
CARS1	P49589-3	Isoform 3 of Cysteine--tRNA ligase, cytoplasmic OS=Homo sapiens OX=9606 GN=CARS1	115758	31	8.15317	0.270974	0.075635	1.52958	0.157577	0.999039	-4.48543	CA	no_hit
CCDC50	Q8IVM0|Q8IVM0-2	Coiled-coil domain-containing protein 50 OS=Homo sapiens OX=9606 GN=CCDC50 PE=1 SV=1|Coiled-coil domain-containing protein 50 OS=Homo sapiens OX=9606 GN=CCDC50 PE=1 SV=1|Isoform 2 of Coiled-coil domain-containing protein 50 OS=Homo sapiens OX=9606 GN=CCDC50	46257.1|71249.3	10	7.3258	-0.356209	0.608972	-1.52841	0.157863	0.999039	-4.48573	CA	no_hit
CAVIN1	Q6NZI2	Caveolae-associated protein 1 OS=Homo sapiens OX=9606 GN=CAVIN1 PE=1 SV=1	55313.9	13	8.36745	-0.373011	-1.95422	-1.52729	0.158139	0.999039	-4.48601	CA	no_hit
UVRAG	E9PR71|Q9P2Y5	UV radiation resistance-associated gene protein OS=Homo sapiens OX=9606 GN=UVRAG PE=1 SV=1|UV radiation resistance-associated gene protein OS=Homo sapiens OX=9606 GN=UVRAG PE=1 SV=1	81082.8|93198.3	2	6.4234	0.384596	0.184549	1.5264	0.158357	0.999039	-4.48623	CA	no_hit
MAPK3	P27361	Mitogen-activated protein kinase 3 OS=Homo sapiens OX=9606 GN=MAPK3 PE=1 SV=4	49838.6	12	7.23114	0.217042	0.385028	1.52483	0.158744	0.999039	-4.48663	CA	no_hit
NTMT1	Q9BV86	N-terminal Xaa-Pro-Lys N-methyltransferase 1 OS=Homo sapiens OX=9606 GN=NTMT1 PE=1 SV=3	29116.3	5	7.55628	0.207394	0.43081	1.52438	0.158853	0.999039	-4.48674	CA	no_hit
IGFBP4	P22692	Insulin-like growth factor-binding protein 4 OS=Homo sapiens OX=9606 GN=IGFBP4 PE=1 SV=2	32763.4	4	6.896	-0.534084	0.730045	-1.52375	0.159011	0.999039	-4.4869	CA	no_hit
PLGRKT	Q9HBL7	Plasminogen receptor (KT) OS=Homo sapiens OX=9606 GN=PLGRKT PE=1 SV=1	21448.8	5	7.56285	0.181335	0.0705337	1.52358	0.159053	0.999039	-4.48695	CA	no_hit
ECPAS	J3KN16|Q5VYK3	Proteasome adapter and scaffold protein ECM29 OS=Homo sapiens OX=9606 GN=ECPAS PE=1 SV=1|Proteasome adapter and scaffold protein ECM29 OS=Homo sapiens OX=9606 GN=ECPAS PE=1 SV=2	267167.0|246140.0	40	7.87962	0.224314	0.131586	1.52343	0.159088	0.999039	-4.48698	CA	no_hit
AAK1	A0A096LP25|Q2M2I8-2|Q2M2I8	AP2-associated protein kinase 1 (Fragment) OS=Homo sapiens OX=9606 GN=AAK1 PE=1 SV=1|Isoform 2 of AP2-associated protein kinase 1 OS=Homo sapiens OX=9606 GN=AAK1|AP2-associated protein kinase 1 (Fragment) OS=Homo sapiens OX=9606 GN=AAK1 PE=1 SV=1|AP2-associated protein kinase 1 OS=Homo sapiens OX=9606 GN=AAK1 PE=1 SV=3|Isoform 2 of AP2-associated protein kinase 1 OS=Homo sapiens OX=9606 GN=AAK1	63521.9|109224.0|119468.0	11	7.22252	-0.327383	-0.535947	-1.52275	0.159256	0.999039	-4.48715	CA	no_hit
GGPS1	O95749	Geranylgeranyl pyrophosphate synthase OS=Homo sapiens OX=9606 GN=GGPS1 PE=1 SV=1	42321	5	7.48292	0.211337	0.470485	1.52193	0.159459	0.999039	-4.48736	CA	no_hit
MAIP1	Q8WWC4	m-AAA protease-interacting protein 1, mitochondrial OS=Homo sapiens OX=9606 GN=MAIP1 PE=1 SV=1	38398.9	8	7.87696	0.228974	-0.000724458	1.52093	0.159707	0.999039	-4.48761	CA	no_hit
ALDH1B1	P30837	Aldehyde dehydrogenase X, mitochondrial OS=Homo sapiens OX=9606 GN=ALDH1B1 PE=1 SV=3	67056.8	13	8.16495	0.205729	0.528587	1.51902	0.16018	0.999039	-4.48809	CA	no_hit
GPD2	P43304	Glycerol-3-phosphate dehydrogenase, mitochondrial OS=Homo sapiens OX=9606 GN=GPD2 PE=1 SV=3	94699.9	34	8.00102	0.222246	0.298631	1.51836	0.160345	0.999039	-4.48826	CA	no_hit
ATP6V1B2	P21281	V-type proton ATPase subunit B, brain isoform OS=Homo sapiens OX=9606 GN=ATP6V1B2 PE=1 SV=3	63195.4	20	8.06424	0.203634	0.329114	1.51795	0.160446	0.999039	-4.48836	CA	no_hit
GPALPP1	A0A0A0MRI1|Q8IXQ4|Q8IXQ4-2	GPALPP motifs-containing protein 1 OS=Homo sapiens OX=9606 GN=GPALPP1 PE=1 SV=1|GPALPP motifs-containing protein 1 OS=Homo sapiens OX=9606 GN=GPALPP1 PE=1 SV=1|Isoform 2 of GPALPP motifs-containing protein 1 OS=Homo sapiens OX=9606 GN=GPALPP1|GPALPP motifs-containing protein 1 OS=Homo sapiens OX=9606 GN=GPALPP1 PE=1 SV=1|GPALPP motifs-containing protein 1 OS=Homo sapiens OX=9606 GN=GPALPP1 PE=1 S…	49204.3|49374.4|30730.2	4	7.09091	0.24461	0.238041	1.51768	0.160513	0.999039	-4.48843	CA	no_hit
NLN	Q9BYT8	Neurolysin, mitochondrial OS=Homo sapiens OX=9606 GN=NLN PE=1 SV=1	96247.1	26	7.97524	0.249372	0.154277	1.51722	0.160627	0.999039	-4.48855	CA	no_hit
PSME3	P61289|P61289-2|K9J957	Proteasome activator complex subunit 3 OS=Homo sapiens OX=9606 GN=PSME3 PE=1 SV=1|Isoform 2 of Proteasome activator complex subunit 3 OS=Homo sapiens OX=9606 GN=PSME3|Proteasome activator complex subunit 3 OS=Homo sapiens OX=9606 GN=PSME3 PE=1 SV=1|Proteasome activator complex subunit 3 OS=Homo sapiens OX=9606 GN=PSME3 PE=1 SV=1|Isoform 2 of Proteasome activator complex subunit 3 OS=Homo sapiens …	35989.9|37730.9|33048.3	12	8.61575	0.184106	0.299223	1.51542	0.161076	0.999039	-4.489	CA	no_hit
STIM1	G0XQ39|Q13586	STIM1L OS=Homo sapiens OX=9606 GN=STIM1 PE=1 SV=1|Stromal interaction molecule 1 OS=Homo sapiens OX=9606 GN=STIM1 PE=1 SV=3|Stromal interaction molecule 1 OS=Homo sapiens OX=9606 GN=STIM1 PE=1 SV=3	104447.0|93175.0	17	7.83859	-0.234361	0.165782	-1.51466	0.161267	0.999039	-4.48919	CA	no_hit
CUEDC2	Q9H467	CUE domain-containing protein 2 OS=Homo sapiens OX=9606 GN=CUEDC2 PE=1 SV=1	37217.6	3	6.51966	-0.508315	0.323446	-1.51439	0.161335	0.999039	-4.48926	CA	no_hit
RAB4A	P20338	Ras-related protein Rab-4A OS=Homo sapiens OX=9606 GN=RAB4A PE=1 SV=3	28309.8	7	7.56581	0.248207	0.138202	1.51436	0.161343	0.999039	-4.48927	CA	no_hit
PGD	P52209|P52209-2	6-phosphogluconate dehydrogenase, decarboxylating OS=Homo sapiens OX=9606 GN=PGD PE=1 SV=3|Isoform 2 of 6-phosphogluconate dehydrogenase, decarboxylating OS=Homo sapiens OX=9606 GN=PGD	64266.4|62999.7	26	9.21236	0.211394	0.191758	1.51322	0.161626	0.999039	-4.48955	CA	no_hit
EIF2B2	P49770	Translation initiation factor eIF-2B subunit beta OS=Homo sapiens OX=9606 GN=EIF2B2 PE=1 SV=3	43451.9	12	7.82091	0.277161	-0.110475	1.51294	0.161697	0.999039	-4.48962	CA	no_hit
NDUFV1	G3V0I5|P49821|P49821-2	NADH dehydrogenase [ubiquinone] flavoprotein 1, mitochondrial OS=Homo sapiens OX=9606 GN=NDUFV1 PE=1 SV=1|NADH dehydrogenase [ubiquinone] flavoprotein 1, mitochondrial OS=Homo sapiens OX=9606 GN=NDUFV1 PE=1 SV=4|Isoform 2 of NADH dehydrogenase [ubiquinone] flavoprotein 1, mitochondrial OS=Homo sapiens OX=9606 GN=NDUFV1	58311.9|59074.2|58125.8	17	8.2893	0.238424	0.390985	1.51279	0.161735	0.999039	-4.48966	CA	no_hit
PI4K2B	G5E9Z4|Q8TCG2	Phosphatidylinositol 4-kinase type 2-beta OS=Homo sapiens OX=9606 GN=PI4K2B PE=1 SV=1|Phosphatidylinositol 4-kinase type 2-beta OS=Homo sapiens OX=9606 GN=PI4K2B PE=1 SV=1	55589.2|65566.0	2	6.07953	-0.200579	0.0733472	-1.5103	0.162359	0.999039	-4.49029	CA	no_hit
PIH1D1	Q9NWS0|Q9NWS0-2|M0R3A8|Q9NWS0-3	PIH1 domain-containing protein 1 OS=Homo sapiens OX=9606 GN=PIH1D1 PE=1 SV=1|Isoform 2 of PIH1 domain-containing protein 1 OS=Homo sapiens OX=9606 GN=PIH1D1|PIH1 domain-containing protein 1 (Fragment) OS=Homo sapiens OX=9606 GN=PIH1D1 PE=1 SV=1|PIH1 domain-containing protein 1 OS=Homo sapiens OX=9606 GN=PIH1D1 PE=1 SV=1|Isoform 3 of PIH1 domain-containing protein 1 OS=Homo sapiens OX=9606 GN=PIH1…	36163.9|21038.7|13951.1|22807.5	7	7.12294	-0.331553	0.479166	-1.51026	0.162368	0.999039	-4.4903	CA	no_hit
ACSL5	Q9ULC5-3	Isoform 2 of Long-chain-fatty-acid--CoA ligase 5 OS=Homo sapiens OX=9606 GN=ACSL5	99359.7	3	6.33161	-0.26592	-0.501303	-1.51012	0.162403	0.999039	-4.49033	CA	no_hit
NIBAN2	Q96TA1|Q96TA1-2	Protein Niban 2 OS=Homo sapiens OX=9606 GN=NIBAN2 PE=1 SV=3|Isoform 2 of Protein Niban 2 OS=Homo sapiens OX=9606 GN=NIBAN2	97678.8|96225.0	23	8.12364	0.244649	0.165321	1.5099	0.162461	0.999039	-4.49039	CA	no_hit
CD9	A0A2R8Y478|A6NNI4|G8JLH6|P21926	Tetraspanin OS=Homo sapiens OX=9606 GN=CD9 PE=1 SV=1|Tetraspanin OS=Homo sapiens OX=9606 GN=CD9 PE=1 SV=1|Tetraspanin OS=Homo sapiens OX=9606 GN=CD9 PE=1 SV=2|CD9 antigen OS=Homo sapiens OX=9606 GN=CD9 PE=1 SV=4	21774.5|21915.7|33904.0|30836.5	3	7.84277	0.278532	0.172263	1.50984	0.162475	0.999039	-4.4904	CA	no_hit
DSTN	P60981	Destrin OS=Homo sapiens OX=9606 GN=DSTN PE=1 SV=3	25338	14	9.06604	0.252389	0.407352	1.50918	0.16264	0.999039	-4.49057	CA	no_hit
AMPD2	A0A5F9UK94|H0Y360|Q01433|Q01433-2	AMP deaminase OS=Homo sapiens OX=9606 GN=AMPD2 PE=1 SV=1|AMP deaminase OS=Homo sapiens OX=9606 GN=AMPD2 PE=1 SV=2|AMP deaminase 2 OS=Homo sapiens OX=9606 GN=AMPD2 PE=1 SV=2|Isoform Ex1A-2-3 of AMP deaminase 2 OS=Homo sapiens OX=9606 GN=AMPD2	107682.0|108847.0|113895.0|103344.0	16	7.38877	0.283803	0.105026	1.50824	0.162878	0.999039	-4.49081	CA	no_hit
PRRC2C	E7EPN9|Q9Y520|Q9Y520-4|Q9Y520-5|Q9Y520-6|Q9Y520-7	Protein PRRC2C OS=Homo sapiens OX=9606 GN=PRRC2C PE=1 SV=1|Protein PRRC2C OS=Homo sapiens OX=9606 GN=PRRC2C PE=1 SV=4|Isoform 4 of Protein PRRC2C OS=Homo sapiens OX=9606 GN=PRRC2C|Isoform 5 of Protein PRRC2C OS=Homo sapiens OX=9606 GN=PRRC2C|Isoform 6 of Protein PRRC2C OS=Homo sapiens OX=9606 GN=PRRC2C|Isoform 7 of Protein PRRC2C OS=Homo sapiens OX=9606 GN=PRRC2C	372739.0|381533.0|372568.0|377260.0|364625.0|381703.0	39	7.57119	-0.504281	-1.03769	-1.50716	0.163149	0.999039	-4.49108	CA	no_hit
PITRM1	Q5JRX3|Q5JRX3-2	Presequence protease, mitochondrial OS=Homo sapiens OX=9606 GN=PITRM1 PE=1 SV=3|Presequence protease, mitochondrial OS=Homo sapiens OX=9606 GN=PITRM1 PE=1 SV=3|Isoform 2 of Presequence protease, mitochondrial OS=Homo sapiens OX=9606 GN=PITRM1	137834.0|137933.0	40	8.18923	0.214091	0.246998	1.50714	0.163155	0.999039	-4.49108	CA	no_hit
MOB2	A0A087WVS8|Q70IA6|Q70IA6-3|Q70IA6-2	MOB kinase activator 2 OS=Homo sapiens OX=9606 GN=MOB2 PE=1 SV=2|MOB kinase activator 2 OS=Homo sapiens OX=9606 GN=MOB2 PE=1 SV=1|Isoform 3 of MOB kinase activator 2 OS=Homo sapiens OX=9606 GN=MOB2|MOB kinase activator 2 OS=Homo sapiens OX=9606 GN=MOB2 PE=1 SV=2|MOB kinase activator 2 OS=Homo sapiens OX=9606 GN=MOB2 PE=1 SV=1|Isoform 2 of MOB kinase activator 2 OS=Homo sapiens OX=9606 GN=MOB2|Iso…	32071.9|32423.0|36448.1|20671.8	3	7.127	0.263224	0.297814	1.50339	0.164104	0.999039	-4.49202	CA	no_hit
PHRF1	A0A0J9YWD5|A0A0J9YX88|A0A0J9YYB5|B7ZM65|E9PJ24|F8WEF5|Q9P1Y6|Q9P1Y6-2|Q9P1Y6-3	PHD and RING finger domain-containing protein 1 OS=Homo sapiens OX=9606 GN=PHRF1 PE=1 SV=1|PHD and RING finger domain-containing protein 1 OS=Homo sapiens OX=9606 GN=PHRF1 PE=1 SV=1|PHD and RING finger domain-containing protein 1 OS=Homo sapiens OX=9606 GN=PHRF1 PE=1 SV=1|PHD and RING finger domain-containing protein 1 OS=Homo sapiens OX=9606 GN=PHRF1 PE=1 SV=1|PHD and RING finger domain-containi…	205402.0|183127.0|205273.0|205041.0|205069.0|205301.0|205517.0|183155.0|205430.0	3	6.43819	-0.443778	-1.4131	-1.50202	0.164451	0.999039	-4.49237	CA	no_hit
PSMB3	P49720	Proteasome subunit beta type-3 OS=Homo sapiens OX=9606 GN=PSMB3 PE=1 SV=2	26869	8	7.92194	0.307589	0.477426	1.5018	0.164507	0.999039	-4.49242	CA	no_hit
ARCN1	B0YIW6|P48444	Coatomer subunit delta OS=Homo sapiens OX=9606 GN=ARCN1 PE=1 SV=1|Coatomer subunit delta OS=Homo sapiens OX=9606 GN=ARCN1 PE=1 SV=1	74021.6|69190.2	26	8.43637	0.203196	0.0789833	1.50154	0.164573	0.999039	-4.49249	CA	no_hit
TCP1	F5H136|P17987	T-complex protein 1 subunit alpha (Fragment) OS=Homo sapiens OX=9606 GN=TCP1 PE=1 SV=1|T-complex protein 1 subunit alpha OS=Homo sapiens OX=9606 GN=TCP1 PE=1 SV=1	17622.7|72987.1	28	8.8131	0.258194	0.263752	1.50054	0.164827	0.999039	-4.49274	CA	no_hit
NCL	P19338	Nucleolin OS=Homo sapiens OX=9606 GN=NCL PE=1 SV=3	104004	38	9.00121	0.344014	-3.30423	1.50008	0.164946	0.999039	-4.49285	CA	no_hit
DPH2	Q9BQC3	2-(3-amino-3-carboxypropyl)histidine synthase subunit 2 OS=Homo sapiens OX=9606 GN=DPH2 PE=1 SV=1	55110.7	7	6.97058	-0.291217	0.180824	-1.49988	0.164995	0.999039	-4.4929	CA	no_hit
ZBTB33	Q86T24	Transcriptional regulator Kaiso OS=Homo sapiens OX=9606 GN=ZBTB33 PE=1 SV=2	86929.5	3	6.23377	-0.412055	-0.49797	-1.49941	0.165115	0.999039	-4.49302	CA	no_hit
TGFB1I1	O43294	Transforming growth factor beta-1-induced transcript 1 protein OS=Homo sapiens OX=9606 GN=TGFB1I1 PE=1 SV=2	56492.9	5	6.87848	-0.294562	0.422128	-1.49788	0.165505	0.999039	-4.4934	CA	no_hit
MMGT1	Q8N4V1|Q8N4V1-2	Membrane magnesium transporter 1 OS=Homo sapiens OX=9606 GN=MMGT1 PE=1 SV=1|Isoform 2 of Membrane magnesium transporter 1 OS=Homo sapiens OX=9606 GN=MMGT1	16863.1|25137.5	4	7.92704	0.175323	0.219568	1.49731	0.165651	0.999039	-4.49355	CA	no_hit
DIMT1	Q9UNQ2	Probable dimethyladenosine transferase OS=Homo sapiens OX=9606 GN=DIMT1 PE=1 SV=1	43104.4	8	7.49999	-0.471368	-2.35448	-1.4973	0.165654	0.999039	-4.49355	CA	no_hit
WDR33	Q9C0J8	pre-mRNA 3' end processing protein WDR33 OS=Homo sapiens OX=9606 GN=WDR33 PE=1 SV=2	161713	16	7.32203	-0.391593	-2.42756	-1.49717	0.165689	0.999039	-4.49358	CA	no_hit
UBE2C	A0A087WVK1|O00762|O00762-3|O00762-4	Ubiquitin-conjugating enzyme E2 C OS=Homo sapiens OX=9606 GN=UBE2C PE=1 SV=1|Ubiquitin-conjugating enzyme E2 C OS=Homo sapiens OX=9606 GN=UBE2C PE=1 SV=1|Isoform 3 of Ubiquitin-conjugating enzyme E2 C OS=Homo sapiens OX=9606 GN=UBE2C|Isoform 4 of Ubiquitin-conjugating enzyme E2 C OS=Homo sapiens OX=9606 GN=UBE2C|Ubiquitin-conjugating enzyme E2 C OS=Homo sapiens OX=9606 GN=UBE2C PE=1 SV=1	16573.8|23404.4|19821.6|20156.7	4	7.16568	-0.629227	0.606665	-1.49667	0.165817	0.999039	-4.49371	CA	no_hit
RRM1	P23921	Ribonucleoside-diphosphate reductase large subunit OS=Homo sapiens OX=9606 GN=RRM1 PE=1 SV=1	108873	29	8.39791	0.274906	0.188044	1.49637	0.165894	0.999039	-4.49378	CA	no_hit
EPN1	Q9Y6I3|Q9Y6I3-1|Q9Y6I3-3	Epsin-1 OS=Homo sapiens OX=9606 GN=EPN1 PE=1 SV=2|Isoform 2 of Epsin-1 OS=Homo sapiens OX=9606 GN=EPN1|Isoform 3 of Epsin-1 OS=Homo sapiens OX=9606 GN=EPN1	66758.1|75612.8|63609.6	7	7.55387	-0.458796	0.706444	-1.49569	0.166067	0.999039	-4.49395	CA	no_hit
TRIM47	Q96LD4	E3 ubiquitin-protein ligase TRIM47 OS=Homo sapiens OX=9606 GN=TRIM47 PE=1 SV=2	75533.5	19	7.58265	0.186952	0.150252	1.49501	0.16624	0.999039	-4.49412	CA	no_hit
TSNAX	Q99598	Translin-associated protein X OS=Homo sapiens OX=9606 GN=TSNAX PE=1 SV=1	39898.3	13	7.77706	0.232594	0.223817	1.49471	0.166318	0.999039	-4.4942	CA	no_hit
PBLD	P30039|P30039-2	Phenazine biosynthesis-like domain-containing protein OS=Homo sapiens OX=9606 GN=PBLD PE=1 SV=2|Isoform 2 of Phenazine biosynthesis-like domain-containing protein OS=Homo sapiens OX=9606 GN=PBLD	36005.0|36237.4	5	6.90046	0.179534	0.435493	1.4942	0.166449	0.999039	-4.49433	CA	no_hit
RPL18A	Q02543	60S ribosomal protein L18a OS=Homo sapiens OX=9606 GN=RPL18A PE=1 SV=2	26205.5	11	8.86478	0.480451	-4.54707	1.49314	0.166723	0.999039	-4.49459	CA	no_hit
TPX2	Q9ULW0|Q9ULW0-2	Targeting protein for Xklp2 OS=Homo sapiens OX=9606 GN=TPX2 PE=1 SV=2|Isoform 2 of Targeting protein for Xklp2 OS=Homo sapiens OX=9606 GN=TPX2	116344.0|120861.0	12	7.27571	-0.486905	-1.30627	-1.4918	0.167066	0.999039	-4.49493	CA	no_hit
EIF4A2	Q14240|Q14240-2	Eukaryotic initiation factor 4A-II OS=Homo sapiens OX=9606 GN=EIF4A2 PE=1 SV=2|Isoform 2 of Eukaryotic initiation factor 4A-II OS=Homo sapiens OX=9606 GN=EIF4A2	53293.4|53380.4	8	7.77287	0.222832	-0.0315574	1.49143	0.167161	0.999039	-4.49502	CA	no_hit
ENAH	A0A0U1RRM6|Q8N8S7|Q8N8S7-2|Q8N8S7-3	Protein enabled homolog OS=Homo sapiens OX=9606 GN=ENAH PE=1 SV=1|Protein enabled homolog OS=Homo sapiens OX=9606 GN=ENAH PE=1 SV=2|Isoform 2 of Protein enabled homolog OS=Homo sapiens OX=9606 GN=ENAH|Isoform 3 of Protein enabled homolog OS=Homo sapiens OX=9606 GN=ENAH	95902.2|73580.7|70692.2|67118.5	12	7.60665	-0.396424	0.106484	-1.49128	0.1672	0.999039	-4.49506	CA	no_hit
SKIV2L	Q15477	Helicase SKI2W OS=Homo sapiens OX=9606 GN=SKIV2L PE=1 SV=3	153543	27	7.41036	0.291894	-0.103304	1.48982	0.167579	0.999039	-4.49542	CA	no_hit
AP1S2	H7BZG6|P56377	AP complex subunit sigma OS=Homo sapiens OX=9606 GN=AP1S2 PE=1 SV=2|AP-1 complex subunit sigma-2 OS=Homo sapiens OX=9606 GN=AP1S2 PE=1 SV=1|AP-1 complex subunit sigma-2 OS=Homo sapiens OX=9606 GN=AP1S2 PE=1 SV=1	23170.8|23394.0	3	6.7629	-0.183376	-0.0248176	-1.48962	0.167628	0.999039	-4.49547	CA	no_hit
SARS1	P49591|Q5T5C7	Serine--tRNA ligase, cytoplasmic OS=Homo sapiens OX=9606 GN=SARS1 PE=1 SV=3|Seryl-tRNA synthetase 1 OS=Homo sapiens OX=9606 GN=SARS1 PE=1 SV=1	72942.6|76693.8	20	7.92526	0.270537	0.161729	1.48778	0.168104	0.999039	-4.49593	CA	no_hit
FERMT2	Q96AC1|Q96AC1-3	Fermitin family homolog 2 OS=Homo sapiens OX=9606 GN=FERMT2 PE=1 SV=1|Isoform 3 of Fermitin family homolog 2 OS=Homo sapiens OX=9606 GN=FERMT2	97602.9|98417.3	17	7.87209	0.236671	0.0865205	1.48755	0.168164	0.999039	-4.49599	CA	no_hit
POR	P16435	NADPH--cytochrome P450 reductase OS=Homo sapiens OX=9606 GN=POR PE=1 SV=2	88048.9	33	8.53411	0.243531	0.135441	1.48703	0.168299	0.999039	-4.49612	CA	no_hit
RELA	Q2TAM5	RELA protein OS=Homo sapiens OX=9606 GN=RELA PE=1 SV=1	48830.5	11	7.53132	-0.258861	0.0243806	-1.48645	0.168451	0.999039	-4.49627	CA	no_hit
ROCK1	Q13464	Rho-associated protein kinase 1 OS=Homo sapiens OX=9606 GN=ROCK1 PE=1 SV=1	200474	26	7.25131	0.255633	-0.0162376	1.4859	0.168593	0.999039	-4.4964	CA	no_hit
ARF4	P18085	ADP-ribosylation factor 4 OS=Homo sapiens OX=9606 GN=ARF4 PE=1 SV=3	23958	5	8.00757	0.258566	0.0873112	1.48579	0.168622	0.999039	-4.49643	CA	no_hit
ZNHIT2	Q9UHR6	Zinc finger HIT domain-containing protein 2 OS=Homo sapiens OX=9606 GN=ZNHIT2 PE=1 SV=1	45366.3	5	6.76258	-0.346254	0.59772	-1.48548	0.168702	0.999039	-4.49651	CA	no_hit
TSR3	Q9UJK0	Ribosome biogenesis protein TSR3 homolog OS=Homo sapiens OX=9606 GN=TSR3 PE=1 SV=1	37491.3	3	6.63587	-0.219694	-0.386355	-1.48538	0.168727	0.999039	-4.49653	CA	no_hit
SPTLC2	O15270	Serine palmitoyltransferase 2 OS=Homo sapiens OX=9606 GN=SPTLC2 PE=1 SV=1	72085.9	15	7.54823	0.194349	0.154214	1.48538	0.168727	0.999039	-4.49653	CA	no_hit
SIRPA	P78324|P78324-2	Tyrosine-protein phosphatase non-receptor type substrate 1 OS=Homo sapiens OX=9606 GN=SIRPA PE=1 SV=2|Isoform 2 of Tyrosine-protein phosphatase non-receptor type substrate 1 OS=Homo sapiens OX=9606 GN=SIRPA	63051.2|63478.4	5	6.8856	-0.271351	0.454769	-1.48383	0.169131	0.999039	-4.49692	CA	no_hit
APOBEC3B	B0QYD3|Q9UH17|Q9UH17-3	DNA dC->dU-editing enzyme APOBEC-3B OS=Homo sapiens OX=9606 GN=APOBEC3B PE=1 SV=1|DNA dC->dU-editing enzyme APOBEC-3B OS=Homo sapiens OX=9606 GN=APOBEC3B PE=1 SV=1|Isoform 3 of DNA dC->dU-editing enzyme APOBEC-3B OS=Homo sapiens OX=9606 GN=APOBEC3B	61353.5|49487.3|46284.5	5	6.77477	0.444737	-3.04014	1.48333	0.169261	0.999039	-4.49705	CA	no_hit
CXXC1	Q9P0U4|Q9P0U4-2	CXXC-type zinc finger protein 1 OS=Homo sapiens OX=9606 GN=CXXC1 PE=1 SV=2|Isoform 2 of CXXC-type zinc finger protein 1 OS=Homo sapiens OX=9606 GN=CXXC1	91538.4|92053.7	5	6.56667	-0.374958	-0.64647	-1.48302	0.169343	0.999039	-4.49712	CA	no_hit
STAM2	O75886	Signal transducing adapter molecule 2 OS=Homo sapiens OX=9606 GN=STAM2 PE=1 SV=1	69174.1	9	7.22188	-0.383383	0.108521	-1.48256	0.169462	0.999039	-4.49724	CA	no_hit
SDSL	Q96GA7	Serine dehydratase-like OS=Homo sapiens OX=9606 GN=SDSL PE=1 SV=1	39785.4	9	7.38847	0.458099	0.184787	1.48209	0.169585	0.999039	-4.49736	CA	no_hit
STAT1	P42224	Signal transducer and activator of transcription 1-alpha/beta OS=Homo sapiens OX=9606 GN=STAT1 PE=1 SV=2	104581	28	8.11146	0.18166	0.212569	1.48191	0.169631	0.999039	-4.4974	CA	no_hit
ANKS3	D3DUE4|F6WF08|Q6ZW76|Q6ZW76-2	Ankyrin repeat and SAM domain-containing protein 3 OS=Homo sapiens OX=9606 GN=ANKS3 PE=1 SV=1|Ankyrin repeat and SAM domain-containing protein 3 OS=Homo sapiens OX=9606 GN=ANKS3 PE=1 SV=1|Ankyrin repeat and SAM domain-containing protein 3 OS=Homo sapiens OX=9606 GN=ANKS3 PE=1 SV=1|Isoform 2 of Ankyrin repeat and SAM domain-containing protein 3 OS=Homo sapiens OX=9606 GN=ANKS3	65482.7|67853.9|80510.3|71497.7	6	6.58969	-0.266596	-0.157336	-1.48182	0.169655	0.999039	-4.49742	CA	no_hit
PTPMT1	Q8WUK0	Phosphatidylglycerophosphatase and protein-tyrosine phosphatase 1 OS=Homo sapiens OX=9606 GN=PTPMT1 PE=1 SV=1	26346.5	9	7.32062	0.187033	0.252604	1.48112	0.169838	0.999039	-4.4976	CA	no_hit
NUDC	Q9Y266	Nuclear migration protein nudC OS=Homo sapiens OX=9606 GN=NUDC PE=1 SV=1	48619.2	23	8.39335	0.187965	0.401597	1.48105	0.169856	0.999039	-4.49762	CA	no_hit
MYO1B	E9PDF6|O43795|C9K0I9|O43795-2	Unconventional myosin-Ib OS=Homo sapiens OX=9606 GN=MYO1B PE=1 SV=1|Unconventional myosin-Ib OS=Homo sapiens OX=9606 GN=MYO1B PE=1 SV=3|Unconventional myosin-Ib (Fragment) OS=Homo sapiens OX=9606 GN=MYO1B PE=1 SV=1|Unconventional myosin-Ib OS=Homo sapiens OX=9606 GN=MYO1B PE=1 SV=1|Unconventional myosin-Ib OS=Homo sapiens OX=9606 GN=MYO1B PE=1 SV=3|Isoform 2 of Unconventional myosin-Ib OS=Homo sa…	161368.0|165783.0|11242.9|156623.0	34	7.90747	0.357375	-1.08279	1.4809	0.169895	0.999039	-4.49765	CA	no_hit
PLEKHA5	Q9HAU0|Q9HAU0-2|Q9HAU0-4|Q9HAU0-6|Q9HAU0-5	Pleckstrin homology domain-containing family A member 5 OS=Homo sapiens OX=9606 GN=PLEKHA5 PE=1 SV=1|Isoform 2 of Pleckstrin homology domain-containing family A member 5 OS=Homo sapiens OX=9606 GN=PLEKHA5|Isoform 4 of Pleckstrin homology domain-containing family A member 5 OS=Homo sapiens OX=9606 GN=PLEKHA5|Isoform 6 of Pleckstrin homology domain-containing family A member 5 OS=Homo sapiens OX=96…	151132.0|158899.0|158979.0|173156.0|143118.0	20	7.19921	-0.371514	-0.942222	-1.4806	0.169974	0.999039	-4.49773	CA	no_hit
ATP6V1A	P38606|P38606-2	V-type proton ATPase catalytic subunit A OS=Homo sapiens OX=9606 GN=ATP6V1A PE=1 SV=2|Isoform 2 of V-type proton ATPase catalytic subunit A OS=Homo sapiens OX=9606 GN=ATP6V1A|V-type proton ATPase catalytic subunit A OS=Homo sapiens OX=9606 GN=ATP6V1A PE=1 SV=2	79306.9|74771.5	25	8.06417	0.196127	0.0946664	1.48043	0.170018	0.999039	-4.49777	CA	no_hit
GOLGA3	Q08378	Golgin subfamily A member 3 OS=Homo sapiens OX=9606 GN=GOLGA3 PE=1 SV=2	200620	42	7.62914	-0.291348	-0.192239	-1.47937	0.170296	0.999039	-4.49804	CA	no_hit
PHF3	Q92576|Q92576-2|A0A1B0GX99	PHD finger protein 3 OS=Homo sapiens OX=9606 GN=PHF3 PE=1 SV=3|Isoform 2 of PHD finger protein 3 OS=Homo sapiens OX=9606 GN=PHF3|PHD finger protein 3 (Fragment) OS=Homo sapiens OX=9606 GN=PHF3 PE=1 SV=1|PHD finger protein 3 OS=Homo sapiens OX=9606 GN=PHF3 PE=1 SV=3|Isoform 2 of PHD finger protein 3 OS=Homo sapiens OX=9606 GN=PHF3	291187.0|280740.0|119735.0	9	6.91793	-0.303064	-1.17859	-1.47928	0.170319	0.999039	-4.49806	CA	no_hit
GMPS	P49915	GMP synthase [glutamine-hydrolyzing] OS=Homo sapiens OX=9606 GN=GMPS PE=1 SV=1	92010.2	30	8.35873	0.204898	0.155034	1.47918	0.170346	0.999039	-4.49808	CA	no_hit
ATP6V1D	Q9Y5K8	V-type proton ATPase subunit D OS=Homo sapiens OX=9606 GN=ATP6V1D PE=1 SV=1	36458.9	5	7.13592	0.268142	-0.240371	1.47915	0.170353	0.999039	-4.49809	CA	no_hit
HAT1	O14929	Histone acetyltransferase type B catalytic subunit OS=Homo sapiens OX=9606 GN=HAT1 PE=1 SV=1	58701.9	10	7.8433	0.262666	0.16684	1.47889	0.170421	0.999039	-4.49816	CA	no_hit
IRF2BPL	Q9H1B7	Probable E3 ubiquitin-protein ligase IRF2BPL OS=Homo sapiens OX=9606 GN=IRF2BPL PE=1 SV=1	93006.8	6	6.70369	-0.500573	-0.0410847	-1.4781	0.170629	0.999039	-4.49835	CA	no_hit
SERPINB6	A0A024QZX5|A0A087X1N8|A0A2R8Y6A7|P35237	Serpin B6 OS=Homo sapiens OX=9606 GN=SERPINB6 PE=1 SV=1|Serpin B6 OS=Homo sapiens OX=9606 GN=SERPINB6 PE=1 SV=1|Serpin B6 (Fragment) OS=Homo sapiens OX=9606 GN=SERPINB6 PE=1 SV=1|Serpin B6 OS=Homo sapiens OX=9606 GN=SERPINB6 PE=1 SV=3|Serpin B6 (Fragment) OS=Homo sapiens OX=9606 GN=SERPINB6 PE=1 SV=1|Serpin B6 OS=Homo sapiens OX=9606 GN=SERPINB6 PE=1 SV=3	51552.0|53957.3|24323.1|51149.8	16	8.09945	0.246691	0.333171	1.4774	0.170813	0.999039	-4.49853	CA	no_hit
SEC11A	H0YNG3|P67812|P67812-3|P67812-4	Signal peptidase complex catalytic subunit SEC11 OS=Homo sapiens OX=9606 GN=SEC11A PE=1 SV=1|Signal peptidase complex catalytic subunit SEC11A OS=Homo sapiens OX=9606 GN=SEC11A PE=1 SV=1|Isoform 3 of Signal peptidase complex catalytic subunit SEC11A OS=Homo sapiens OX=9606 GN=SEC11A|Isoform 4 of Signal peptidase complex catalytic subunit SEC11A OS=Homo sapiens OX=9606 GN=SEC11A	21490.8|23958.4|24957.5|21713.9	7	8.27562	0.212579	0.121615	1.47724	0.170855	0.999039	-4.49857	CA	no_hit
EMD	P50402	Emerin OS=Homo sapiens OX=9606 GN=EMD PE=1 SV=1	30858.2	9	8.14893	-0.25513	-0.823052	-1.47541	0.171335	0.999039	-4.49902	CA	no_hit
SNRPA	P09012	U1 small nuclear ribonucleoprotein A OS=Homo sapiens OX=9606 GN=SNRPA PE=1 SV=3	37951.8	9	8.1946	-0.437476	-0.777927	-1.47503	0.171435	0.999039	-4.49912	CA	no_hit
TK2	A0A0A0MSY7|H3BP77|O00142|O00142-2|O00142-3|O00142-4|O00142-5|O00142-6	Thymidine kinase 2, mitochondrial OS=Homo sapiens OX=9606 GN=TK2 PE=1 SV=1|Thymidine kinase 2, mitochondrial OS=Homo sapiens OX=9606 GN=TK2 PE=1 SV=1|Thymidine kinase 2, mitochondrial OS=Homo sapiens OX=9606 GN=TK2 PE=1 SV=4|Isoform 2 of Thymidine kinase 2, mitochondrial OS=Homo sapiens OX=9606 GN=TK2|Isoform 3 of Thymidine kinase 2, mitochondrial OS=Homo sapiens OX=9606 GN=TK2|Isoform 4 of Thymi…	37908.1|36844.4|34977.4|31536.5|31930.0|32590.1|22264.6|40295.5	3	6.96256	0.23803	-0.0370988	1.47419	0.171657	0.999039	-4.49933	CA	no_hit
CYP51A1	A0A0C4DFL7|Q16850	Lanosterol 14-alpha demethylase OS=Homo sapiens OX=9606 GN=CYP51A1 PE=1 SV=1|Lanosterol 14-alpha demethylase OS=Homo sapiens OX=9606 GN=CYP51A1 PE=1 SV=3	67375.5|66903.3	10	7.70338	0.252736	0.140554	1.47394	0.171724	0.999039	-4.49939	CA	no_hit
MED12	Q93074|Q93074-2|Q93074-3	Mediator of RNA polymerase II transcription subunit 12 OS=Homo sapiens OX=9606 GN=MED12 PE=1 SV=4|Isoform 2 of Mediator of RNA polymerase II transcription subunit 12 OS=Homo sapiens OX=9606 GN=MED12|Isoform 3 of Mediator of RNA polymerase II transcription subunit 12 OS=Homo sapiens OX=9606 GN=MED12	277911.0|278528.0|277783.0	18	6.73334	-0.548287	-1.21118	-1.47384	0.171749	0.999039	-4.49941	CA	no_hit
NARS2	Q96I59	Probable asparagine--tRNA ligase, mitochondrial OS=Homo sapiens OX=9606 GN=NARS2 PE=1 SV=3	62478.3	12	7.52713	-0.336364	-0.965638	-1.47338	0.171871	0.999039	-4.49953	CA	no_hit
PXN	A0A1B0GTU4|F5GZ78|P49023|P49023-2|P49023-3	Paxillin OS=Homo sapiens OX=9606 GN=PXN PE=1 SV=1|Paxillin OS=Homo sapiens OX=9606 GN=PXN PE=1 SV=1|Paxillin OS=Homo sapiens OX=9606 GN=PXN PE=1 SV=3|Isoform Alpha of Paxillin OS=Homo sapiens OX=9606 GN=PXN|Isoform Gamma of Paxillin OS=Homo sapiens OX=9606 GN=PXN|Paxillin OS=Homo sapiens OX=9606 GN=PXN PE=1 SV=1|Paxillin OS=Homo sapiens OX=9606 GN=PXN PE=1 SV=3	128114.0|74800.5|75072.6|71479.0|77139.9	14	7.43363	-0.322683	0.238133	-1.47295	0.171984	0.999039	-4.49964	CA	no_hit
RTL8C	A6ZKI3	Retrotransposon Gag-like protein 8C OS=Homo sapiens OX=9606 GN=RTL8C PE=1 SV=1	14683.8	3	6.83669	0.24566	0.165313	1.47261	0.172074	0.999039	-4.49972	CA	no_hit
SMARCC1	Q92922	SWI/SNF complex subunit SMARCC1 OS=Homo sapiens OX=9606 GN=SMARCC1 PE=1 SV=3	147944	13	7.54169	-0.511506	-0.7886	-1.47147	0.172375	0.999039	-4.50001	CA	no_hit
GALNT7	Q86SF2	N-acetylgalactosaminyltransferase 7 OS=Homo sapiens OX=9606 GN=GALNT7 PE=1 SV=1	89106.2	24	7.96922	0.187569	0.134926	1.47079	0.172556	0.999039	-4.50018	CA	no_hit
KAT8	Q9H7Z6|Q9H7Z6-2	Histone acetyltransferase KAT8 OS=Homo sapiens OX=9606 GN=KAT8 PE=1 SV=2|Isoform 2 of Histone acetyltransferase KAT8 OS=Homo sapiens OX=9606 GN=KAT8	65963.8|64820.8	3	6.50859	-0.219093	-0.56536	-1.47036	0.17267	0.999039	-4.50028	CA	no_hit
FADD	Q13158	FAS-associated death domain protein OS=Homo sapiens OX=9606 GN=FADD PE=1 SV=1	25926.6	6	7.44494	0.215283	0.433846	1.46946	0.172908	0.999039	-4.50051	CA	no_hit
FKBP5	Q13451	Peptidyl-prolyl cis-trans isomerase FKBP5 OS=Homo sapiens OX=9606 GN=FKBP5 PE=1 SV=2	67815.7	18	7.53356	0.203218	0.605896	1.46933	0.172943	0.999039	-4.50054	CA	no_hit
C9orf64	Q5T6V5	Queuosine salvage protein OS=Homo sapiens OX=9606 GN=C9orf64 PE=1 SV=1	45239.9	14	7.66706	0.270114	0.121817	1.46883	0.173075	0.999039	-4.50066	CA	no_hit
SPC25	Q9HBM1	Kinetochore protein Spc25 OS=Homo sapiens OX=9606 GN=SPC25 PE=1 SV=1	34407.1	6	6.9237	0.296633	0.775745	1.46792	0.173317	0.999039	-4.50089	CA	no_hit
POLD3	Q15054	DNA polymerase delta subunit 3 OS=Homo sapiens OX=9606 GN=POLD3 PE=1 SV=2	69601.6	11	7.34976	-0.187624	-0.022398	-1.46779	0.173354	0.999039	-4.50092	CA	no_hit
XPO4	F2Z2X4|Q9C0E2	Exportin-4 OS=Homo sapiens OX=9606 GN=XPO4 PE=1 SV=1|Exportin-4 OS=Homo sapiens OX=9606 GN=XPO4 PE=1 SV=2	145927.0|145608.0	11	7.13852	0.211162	0.182533	1.46764	0.173392	0.999039	-4.50096	CA	no_hit
ATXN10	Q9UBB4	Ataxin-10 OS=Homo sapiens OX=9606 GN=ATXN10 PE=1 SV=1	62105.5	18	7.73998	0.213647	0.171492	1.46749	0.173434	0.999039	-4.501	CA	no_hit
IRF2BP1	Q8IU81	Interferon regulatory factor 2-binding protein 1 OS=Homo sapiens OX=9606 GN=IRF2BP1 PE=1 SV=1	69253.9	12	7.24422	-0.471518	0.291484	-1.46731	0.17348	0.999039	-4.50104	CA	no_hit
UQCRQ	O14949	Cytochrome b-c1 complex subunit 8 OS=Homo sapiens OX=9606 GN=UQCRQ PE=1 SV=4	11117	6	8.34601	0.209801	0.127574	1.46643	0.173715	0.999039	-4.50126	CA	no_hit
DNAJC9	Q8WXX5	DnaJ homolog subfamily C member 9 OS=Homo sapiens OX=9606 GN=DNAJC9 PE=1 SV=1	38275.8	11	7.74963	-0.684373	-0.987418	-1.46418	0.174314	0.999039	-4.50182	CA	no_hit
YKT6	O15498	Synaptobrevin homolog YKT6 OS=Homo sapiens OX=9606 GN=YKT6 PE=1 SV=1	27137.6	10	7.92156	0.261577	0.00705659	1.46368	0.174449	0.999039	-4.50195	CA	no_hit
UTP3	Q9NQZ2	Something about silencing protein 10 OS=Homo sapiens OX=9606 GN=UTP3 PE=1 SV=1	69849.5	3	6.66834	-0.596628	-3.28732	-1.46354	0.174486	0.999039	-4.50198	CA	no_hit
PSMA7	O14818	Proteasome subunit alpha type-7 OS=Homo sapiens OX=9606 GN=PSMA7 PE=1 SV=1	34733.2	15	8.82222	0.294469	0.809035	1.46257	0.174745	0.999039	-4.50222	CA	no_hit
SMPD2	O60906|H0Y5N2	Sphingomyelin phosphodiesterase 2 OS=Homo sapiens OX=9606 GN=SMPD2 PE=1 SV=2|Sphingomyelin phosphodiesterase 2 (Fragment) OS=Homo sapiens OX=9606 GN=SMPD2 PE=1 SV=1|Sphingomyelin phosphodiesterase 2 OS=Homo sapiens OX=9606 GN=SMPD2 PE=1 SV=2	52995.6|26103.2	4	6.75242	0.202537	0.0227877	1.46243	0.174783	0.999039	-4.50226	CA	no_hit
PCBD1	P61457	Pterin-4-alpha-carbinolamine dehydratase OS=Homo sapiens OX=9606 GN=PCBD1 PE=1 SV=2	13570.1	5	8.01112	0.222471	0.675793	1.46232	0.174813	0.999039	-4.50228	CA	no_hit
NAA30	Q147X3|Q147X3-2	N-alpha-acetyltransferase 30 OS=Homo sapiens OX=9606 GN=NAA30 PE=1 SV=1|Isoform 2 of N-alpha-acetyltransferase 30 OS=Homo sapiens OX=9606 GN=NAA30|N-alpha-acetyltransferase 30 OS=Homo sapiens OX=9606 GN=NAA30 PE=1 SV=1	44427.9|40272.0	8	7.20695	-0.221278	0.24665	-1.46219	0.174848	0.999039	-4.50232	CA	no_hit
PRODH2	A0A590UKC3|Q9UF12	Proline dehydrogenase OS=Homo sapiens OX=9606 GN=PRODH2 PE=1 SV=1|Hydroxyproline dehydrogenase OS=Homo sapiens OX=9606 GN=PRODH2 PE=1 SV=1	54648.5|63339.1	4	6.46972	0.253932	-0.0189384	1.46155	0.17502	0.999039	-4.50248	CA	no_hit
ATP6V1H	Q9UI12	V-type proton ATPase subunit H OS=Homo sapiens OX=9606 GN=ATP6V1H PE=1 SV=1	65847.7	12	7.56689	0.208695	0.164351	1.46096	0.175178	0.999039	-4.50262	CA	no_hit
NT5C3A	Q9H0P0-1|X6RM59	Isoform 1 of Cytosolic 5'-nucleotidase 3A OS=Homo sapiens OX=9606 GN=NT5C3A|5'-nucleotidase OS=Homo sapiens OX=9606 GN=NT5C3A PE=1 SV=1|Isoform 1 of Cytosolic 5'-nucleotidase 3A OS=Homo sapiens OX=9606 GN=NT5C3A	42392.1|46849.9	17	7.89185	0.212303	0.301606	1.46023	0.175375	0.999039	-4.5028	CA	no_hit
ATIC	P31939	Bifunctional purine biosynthesis protein PURH OS=Homo sapiens OX=9606 GN=ATIC PE=1 SV=3	76344.2	30	8.38021	0.183528	0.438457	1.4598	0.175489	0.999039	-4.50291	CA	no_hit
SEC31A	D6REX3|O94979|O94979-2|O94979-3|O94979-8|O94979-9	Protein transport protein Sec31A OS=Homo sapiens OX=9606 GN=SEC31A PE=1 SV=1|Protein transport protein Sec31A OS=Homo sapiens OX=9606 GN=SEC31A PE=1 SV=3|Isoform 2 of Protein transport protein Sec31A OS=Homo sapiens OX=9606 GN=SEC31A|Isoform 3 of Protein transport protein Sec31A OS=Homo sapiens OX=9606 GN=SEC31A|Isoform 8 of Protein transport protein Sec31A OS=Homo sapiens OX=9606 GN=SEC31A|Isofo…	157188.0|153674.0|152194.0|142318.0|155158.0|150913.0	29	8.2932	-0.36359	-0.187116	-1.45853	0.175832	0.999039	-4.50323	CA	no_hit
SPECC1	Q5M775|Q5M775-4	Cytospin-B OS=Homo sapiens OX=9606 GN=SPECC1 PE=1 SV=1|Isoform 4 of Cytospin-B OS=Homo sapiens OX=9606 GN=SPECC1|Cytospin-B OS=Homo sapiens OX=9606 GN=SPECC1 PE=1 SV=1	145358.0|134891.0	20	7.35737	-0.316143	-0.312178	-1.45797	0.175982	0.999039	-4.50336	CA	no_hit
HECTD3	Q5T447	E3 ubiquitin-protein ligase HECTD3 OS=Homo sapiens OX=9606 GN=HECTD3 PE=1 SV=1	110607	14	7.18253	0.256906	0.0999614	1.45725	0.176175	0.999039	-4.50354	CA	no_hit
KIRREL1	Q96J84|Q96J84-2	Kin of IRRE-like protein 1 OS=Homo sapiens OX=9606 GN=KIRREL1 PE=1 SV=2|Isoform 2 of Kin of IRRE-like protein 1 OS=Homo sapiens OX=9606 GN=KIRREL1	91716.2|93229.0	4	6.54669	-0.21749	0.0572239	-1.45613	0.176478	0.999039	-4.50382	CA	no_hit
MAP1S	Q66K74|Q66K74-2	Microtubule-associated protein 1S OS=Homo sapiens OX=9606 GN=MAP1S PE=1 SV=2|Isoform 2 of Microtubule-associated protein 1S OS=Homo sapiens OX=9606 GN=MAP1S	124975.0|122553.0	12	7.48552	-0.234253	-0.00502618	-1.45571	0.176593	0.999039	-4.50393	CA	no_hit
GLUD1	P00367	Glutamate dehydrogenase 1, mitochondrial OS=Homo sapiens OX=9606 GN=GLUD1 PE=1 SV=2	71740.2	11	8.32975	0.21795	0.402231	1.45437	0.176953	0.999039	-4.50426	CA	no_hit
UBR4	Q5T4S7|Q5T4S7-2|Q5T4S7-3|Q5T4S7-4	E3 ubiquitin-protein ligase UBR4 OS=Homo sapiens OX=9606 GN=UBR4 PE=1 SV=1|Isoform 2 of E3 ubiquitin-protein ligase UBR4 OS=Homo sapiens OX=9606 GN=UBR4|Isoform 3 of E3 ubiquitin-protein ligase UBR4 OS=Homo sapiens OX=9606 GN=UBR4|Isoform 4 of E3 ubiquitin-protein ligase UBR4 OS=Homo sapiens OX=9606 GN=UBR4	668159.0|670693.0|666475.0|668095.0	98	8.20951	0.244	-0.12912	1.45415	0.177014	0.999039	-4.50431	CA	no_hit
FTO	A0A1B0GTC3|A0A1B0GVH5|Q9C0B1	Alpha-ketoglutarate-dependent dioxygenase FTO OS=Homo sapiens OX=9606 GN=FTO PE=1 SV=1|Alpha-ketoglutarate-dependent dioxygenase FTO OS=Homo sapiens OX=9606 GN=FTO PE=1 SV=1|Alpha-ketoglutarate-dependent dioxygenase FTO OS=Homo sapiens OX=9606 GN=FTO PE=1 SV=3	70951.8|74506.6|67865.2	12	7.53046	0.172764	0.237299	1.45284	0.177369	0.999039	-4.50464	CA	no_hit
GBE1	Q04446	1,4-alpha-glucan-branching enzyme OS=Homo sapiens OX=9606 GN=GBE1 PE=1 SV=3	91221.9	25	7.9508	0.231485	0.0863054	1.45213	0.177562	0.999039	-4.50481	CA	no_hit
MFHAS1	Q9Y4C4	Malignant fibrous histiocytoma-amplified sequence 1 OS=Homo sapiens OX=9606 GN=MFHAS1 PE=1 SV=2	129824	4	6.52853	0.412271	-0.141201	1.45178	0.177657	0.999039	-4.5049	CA	no_hit
UBA6	A0AVT1	Ubiquitin-like modifier-activating enzyme 6 OS=Homo sapiens OX=9606 GN=UBA6 PE=1 SV=1	142326	26	7.63435	0.200504	0.144439	1.45122	0.177809	0.999039	-4.50504	CA	no_hit
AARS1	P49588	Alanine--tRNA ligase, cytoplasmic OS=Homo sapiens OX=9606 GN=AARS1 PE=1 SV=2	127562	41	8.42519	0.199316	0.234154	1.45111	0.17784	0.999039	-4.50507	CA	no_hit
CSE1L	P55060|P55060-3	Exportin-2 OS=Homo sapiens OX=9606 GN=CSE1L PE=1 SV=3|Isoform 3 of Exportin-2 OS=Homo sapiens OX=9606 GN=CSE1L	128789.0|126151.0	32	8.33873	0.191432	0.106891	1.45106	0.177854	0.999039	-4.50508	CA	no_hit
RAB3GAP1	Q15042|Q15042-3	Rab3 GTPase-activating protein catalytic subunit OS=Homo sapiens OX=9606 GN=RAB3GAP1 PE=1 SV=3|Rab3 GTPase-activating protein catalytic subunit OS=Homo sapiens OX=9606 GN=RAB3GAP1 PE=1 SV=3|Isoform 2 of Rab3 GTPase-activating protein catalytic subunit OS=Homo sapiens OX=9606 GN=RAB3GAP1	131976.0|132737.0	21	7.58807	0.197687	0.0629572	1.44935	0.178318	0.999039	-4.5055	CA	no_hit
TNRC6B	Q9UPQ9|Q9UPQ9-1	Trinucleotide repeat-containing gene 6B protein OS=Homo sapiens OX=9606 GN=TNRC6B PE=1 SV=4|Isoform 2 of Trinucleotide repeat-containing gene 6B protein OS=Homo sapiens OX=9606 GN=TNRC6B	223942.0|211736.0	5	6.44993	-0.361253	-0.877426	-1.44905	0.178399	0.999039	-4.50558	CA	no_hit
IPO5	O00410|O00410-3	Importin-5 OS=Homo sapiens OX=9606 GN=IPO5 PE=1 SV=4|Isoform 3 of Importin-5 OS=Homo sapiens OX=9606 GN=IPO5	142981.0|145199.0	32	8.29694	0.22021	0.148401	1.44895	0.178428	0.999039	-4.5056	CA	no_hit
PPIL1	Q9Y3C6	Peptidyl-prolyl cis-trans isomerase-like 1 OS=Homo sapiens OX=9606 GN=PPIL1 PE=1 SV=1	21381.2	5	7.58669	-0.36969	0.47406	-1.44866	0.178507	0.999039	-4.50568	CA	no_hit
CCT7	Q99832	T-complex protein 1 subunit eta OS=Homo sapiens OX=9606 GN=CCT7 PE=1 SV=2	72314.6	30	8.95562	0.25253	0.244236	1.44828	0.17861	0.999039	-4.50577	CA	no_hit
VIM	P08670	Vimentin OS=Homo sapiens OX=9606 GN=VIM PE=1 SV=4	60368.7	27	9.24463	-0.841709	-3.83089	-1.44786	0.178724	0.999039	-4.50587	CA	no_hit
HNRNPA3	P51991|P51991-2	Heterogeneous nuclear ribonucleoprotein A3 OS=Homo sapiens OX=9606 GN=HNRNPA3 PE=1 SV=2|Isoform 2 of Heterogeneous nuclear ribonucleoprotein A3 OS=Homo sapiens OX=9606 GN=HNRNPA3	46187.0|43318.4	17	8.36734	0.288278	-2.56189	1.44775	0.178754	0.999039	-4.5059	CA	no_hit
NAA25	Q14CX7	N-alpha-acetyltransferase 25, NatB auxiliary subunit OS=Homo sapiens OX=9606 GN=NAA25 PE=1 SV=1	136861	26	7.63021	0.260924	0.088724	1.44769	0.178772	0.999039	-4.50592	CA	no_hit
LRPPRC	P42704	Leucine-rich PPR motif-containing protein, mitochondrial OS=Homo sapiens OX=9606 GN=LRPPRC PE=1 SV=3	190032	72	8.77961	0.245359	0.0105458	1.44734	0.178868	0.999039	-4.506	CA	no_hit
NDUFA9	Q16795	NADH dehydrogenase [ubiquinone] 1 alpha subcomplex subunit 9, mitochondrial OS=Homo sapiens OX=9606 GN=NDUFA9 PE=1 SV=2	49346.2	3	7.38604	0.264602	0.0531641	1.44636	0.179135	0.999039	-4.50624	CA	no_hit
ELMO2	Q5JVZ5|Q96JJ3	Engulfment and cell motility protein 2 OS=Homo sapiens OX=9606 GN=ELMO2 PE=1 SV=1|Engulfment and cell motility protein 2 OS=Homo sapiens OX=9606 GN=ELMO2 PE=1 SV=2	95849.3|96099.3	14	7.45209	0.273628	-0.157001	1.44606	0.179216	0.999039	-4.50632	CA	no_hit
SELENOO	A0A087X0Q9|Q9BVL4	Protein adenylyltransferase SelO, mitochondrial OS=Homo sapiens OX=9606 GN=SELENOO PE=1 SV=1|Protein adenylyltransferase SelO, mitochondrial OS=Homo sapiens OX=9606 GN=SELENOO PE=1 SV=3	78102.8|78253.7	5	6.48771	0.161303	0.268965	1.44577	0.179295	0.999039	-4.50639	CA	no_hit
CTR9	Q6PD62	RNA polymerase-associated protein CTR9 homolog OS=Homo sapiens OX=9606 GN=CTR9 PE=1 SV=1	167187	26	7.72945	0.554151	-2.38373	1.44537	0.179405	0.999039	-4.50649	CA	no_hit
ODR4	Q5SWX8|Q5SWX8-2	Protein odr-4 homolog OS=Homo sapiens OX=9606 GN=ODR4 PE=1 SV=1|Isoform 2 of Protein odr-4 homolog OS=Homo sapiens OX=9606 GN=ODR4|Protein odr-4 homolog OS=Homo sapiens OX=9606 GN=ODR4 PE=1 SV=1	61128.4|57978.7	14	7.54945	0.173122	0.198526	1.44474	0.179579	0.999039	-4.50665	CA	no_hit
FAM160B1	Q5W0V3|Q5W0V3-2	Protein FAM160B1 OS=Homo sapiens OX=9606 GN=FAM160B1 PE=1 SV=1|Isoform 2 of Protein FAM160B1 OS=Homo sapiens OX=9606 GN=FAM160B1|Protein FAM160B1 OS=Homo sapiens OX=9606 GN=FAM160B1 PE=1 SV=1	98537.9|95050.9	12	7.20838	0.212621	0.0169288	1.4446	0.179617	0.999039	-4.50668	CA	no_hit
ABCG2	Q9UNQ0|Q9UNQ0-2	Broad substrate specificity ATP-binding cassette transporter ABCG2 OS=Homo sapiens OX=9606 GN=ABCG2 PE=1 SV=3|Isoform 2 of Broad substrate specificity ATP-binding cassette transporter ABCG2 OS=Homo sapiens OX=9606 GN=ABCG2	85120.0|79292.6	5	7.17379	0.341816	-1.02347	1.44457	0.179626	0.999039	-4.50669	CA	no_hit
MED14	O60244	Mediator of RNA polymerase II transcription subunit 14 OS=Homo sapiens OX=9606 GN=MED14 PE=1 SV=2	182673	8	6.76054	-0.466574	-1.35561	-1.44359	0.179893	0.999039	-4.50693	CA	no_hit
LETM1	O95202	Mitochondrial proton/calcium exchanger protein OS=Homo sapiens OX=9606 GN=LETM1 PE=1 SV=1	104368	26	7.99291	0.202102	-0.0575712	1.44346	0.17993	0.999039	-4.50696	CA	no_hit
METTL5	B8ZZC8|B8ZZE3|Q9NRN9	Methyltransferase-like protein 5 OS=Homo sapiens OX=9606 GN=METTL5 PE=1 SV=1|Methyltransferase like 5, isoform CRA_b OS=Homo sapiens OX=9606 GN=METTL5 PE=1 SV=1|Methyltransferase-like protein 5 OS=Homo sapiens OX=9606 GN=METTL5 PE=1 SV=1|Methyltransferase-like protein 5 OS=Homo sapiens OX=9606 GN=METTL5 PE=1 SV=1	34181.6|28491.4|29826.1	6	6.96412	0.234239	0.0552909	1.44235	0.180236	0.999039	-4.50724	CA	no_hit
GSTM3	P21266	Glutathione S-transferase Mu 3 OS=Homo sapiens OX=9606 GN=GSTM3 PE=1 SV=3	32474	8	7.18565	0.202318	0.501961	1.44222	0.180272	0.999039	-4.50727	CA	no_hit
HSDL1	Q3SXM5	Inactive hydroxysteroid dehydrogenase-like protein 1 OS=Homo sapiens OX=9606 GN=HSDL1 PE=1 SV=3	42548.8	6	6.97789	0.240671	0.196665	1.44179	0.18039	0.999039	-4.50738	CA	no_hit
ADK	P55263	Adenosine kinase OS=Homo sapiens OX=9606 GN=ADK PE=1 SV=2	51261.9	10	7.83097	0.173922	0.466619	1.44139	0.1805	0.999039	-4.50748	CA	no_hit
CHMP7	Q8WUX9	Charged multivesicular body protein 7 OS=Homo sapiens OX=9606 GN=CHMP7 PE=1 SV=1	60290.7	7	7.253	0.172382	0.398522	1.44119	0.180553	0.999039	-4.50752	CA	no_hit
EIF4A1	J3KTN0|P60842	Eukaryotic initiation factor 4A-I (Fragment) OS=Homo sapiens OX=9606 GN=EIF4A1 PE=1 SV=1|Eukaryotic initiation factor 4A-I OS=Homo sapiens OX=9606 GN=EIF4A1 PE=1 SV=1	16692.1|52436.8	13	8.94707	0.205025	0.154796	1.44056	0.180728	0.999039	-4.50768	CA	no_hit
CPOX	P36551	Oxygen-dependent coproporphyrinogen-III oxidase, mitochondrial OS=Homo sapiens OX=9606 GN=CPOX PE=1 SV=3	57610.8	16	7.79871	0.177336	0.291116	1.44048	0.180751	0.999039	-4.5077	CA	no_hit
PPP2R2D	Q66LE6	Serine/threonine-protein phosphatase 2A 55 kDa regulatory subunit B delta isoform OS=Homo sapiens OX=9606 GN=PPP2R2D PE=1 SV=1	60793.4	3	7.14595	0.243242	0.178894	1.44039	0.180775	0.999039	-4.50772	CA	no_hit
ATP13A1	Q9HD20|Q9HD20-2|Q9HD20-3	Manganese-transporting ATPase 13A1 OS=Homo sapiens OX=9606 GN=ATP13A1 PE=1 SV=2|Manganese-transporting ATPase 13A1 OS=Homo sapiens OX=9606 GN=ATP13A1 PE=1 SV=2|Isoform B of Manganese-transporting ATPase 13A1 OS=Homo sapiens OX=9606 GN=ATP13A1|Isoform C of Manganese-transporting ATPase 13A1 OS=Homo sapiens OX=9606 GN=ATP13A1	153080.0|140900.0|43391.7	25	7.84412	0.177531	0.215047	1.44026	0.180811	0.999039	-4.50775	CA	no_hit
HNRNPU	Q00839|Q00839-2|Q5RI18	Heterogeneous nuclear ribonucleoprotein U OS=Homo sapiens OX=9606 GN=HNRNPU PE=1 SV=6|Isoform 2 of Heterogeneous nuclear ribonucleoprotein U OS=Homo sapiens OX=9606 GN=HNRNPU|Heterogeneous nuclear ribonucleoprotein U OS=Homo sapiens OX=9606 GN=HNRNPU PE=1 SV=9|Heterogeneous nuclear ribonucleoprotein U OS=Homo sapiens OX=9606 GN=HNRNPU PE=1 SV=6|Isoform 2 of Heterogeneous nuclear ribonucleoprotein…	112564.0|110047.0|85919.6	42	9.24231	0.353335	-2.01099	1.4399	0.180909	0.999039	-4.50784	CA	no_hit
URM1	Q9BTM9|Q9BTM9-2	Ubiquitin-related modifier 1 OS=Homo sapiens OX=9606 GN=URM1 PE=1 SV=1|Isoform 2 of Ubiquitin-related modifier 1 OS=Homo sapiens OX=9606 GN=URM1	12894.0|17630.5	2	7.00739	-0.240715	0.39712	-1.43967	0.180973	0.999039	-4.5079	CA	no_hit
PRKCD	Q05655	Protein kinase C delta type OS=Homo sapiens OX=9606 GN=PRKCD PE=1 SV=2	96600.5	17	7.12451	0.224906	0.130561	1.4396	0.180994	0.999039	-4.50792	CA	no_hit
PIGQ	Q9BRB3	Phosphatidylinositol N-acetylglucosaminyltransferase subunit Q OS=Homo sapiens OX=9606 GN=PIGQ PE=1 SV=3	89046.9	2	6.30238	0.232563	-0.173058	1.43899	0.181163	0.999039	-4.50807	CA	no_hit
ATP6V0D1	F5GYQ1|P61421|R4GN72	V-type proton ATPase subunit OS=Homo sapiens OX=9606 GN=ATP6V0D1 PE=1 SV=1|V-type proton ATPase subunit d 1 OS=Homo sapiens OX=9606 GN=ATP6V0D1 PE=1 SV=1|V-type proton ATPase subunit d 1 OS=Homo sapiens OX=9606 GN=ATP6V0D1 PE=1 SV=1|V-type proton ATPase subunit OS=Homo sapiens OX=9606 GN=ATP6V0D1 PE=1 SV=1|V-type proton ATPase subunit d 1 OS=Homo sapiens OX=9606 GN=ATP6V0D1 PE=1 SV=1	50563.3|45930.9|36009.7	10	7.69027	0.223406	-0.611809	1.43876	0.181225	0.999039	-4.50813	CA	no_hit
TMED10	P49755	Transmembrane emp24 domain-containing protein 10 OS=Homo sapiens OX=9606 GN=TMED10 PE=1 SV=2	30302.6	8	8.53674	0.262268	0.370238	1.43847	0.181305	0.999039	-4.5082	CA	no_hit
BIN3	Q9NQY0	Bridging integrator 3 OS=Homo sapiens OX=9606 GN=BIN3 PE=1 SV=1	37004.3	4	6.74206	-0.330526	0.506852	-1.43793	0.181454	0.999039	-4.50833	CA	no_hit
MRPL57	Q9BQC6	Ribosomal protein 63, mitochondrial OS=Homo sapiens OX=9606 GN=MRPL57 PE=1 SV=1	14083.8	3	7.34922	0.353573	-0.875941	1.43681	0.181765	0.999039	-4.50861	CA	no_hit
GLDC	P23378	Glycine dehydrogenase (decarboxylating), mitochondrial OS=Homo sapiens OX=9606 GN=GLDC PE=1 SV=2	128552	15	7.45108	0.236432	0.191583	1.43672	0.181788	0.999039	-4.50863	CA	no_hit
WASHC3	F5GWI9|F5GXZ7|F5GZ97|Q9Y3C0	WASH complex subunit 3 OS=Homo sapiens OX=9606 GN=WASHC3 PE=1 SV=1|WASH complex subunit 3 OS=Homo sapiens OX=9606 GN=WASHC3 PE=1 SV=1|WASH complex subunit 3 OS=Homo sapiens OX=9606 GN=WASHC3 PE=1 SV=1|WASH complex subunit 3 OS=Homo sapiens OX=9606 GN=WASHC3 PE=1 SV=1	21013.2|22784.5|23522.2|23650.3	4	6.75143	-0.259476	0.421064	-1.43625	0.18192	0.999039	-4.50875	CA	no_hit
RAB8A	P61006	Ras-related protein Rab-8A OS=Homo sapiens OX=9606 GN=RAB8A PE=1 SV=1	29908.4	10	8.07	0.22399	-0.0458379	1.43597	0.181998	0.999039	-4.50881	CA	no_hit
XPO1	O14980	Exportin-1 OS=Homo sapiens OX=9606 GN=XPO1 PE=1 SV=1	143307	33	8.41297	0.220663	0.0969163	1.43559	0.182102	0.999039	-4.50891	CA	no_hit
HAO1	Q9UJM8	Hydroxyacid oxidase 1 OS=Homo sapiens OX=9606 GN=HAO1 PE=1 SV=1	48427.5	7	7.16373	0.239915	0.0952142	1.43548	0.182134	0.999039	-4.50894	CA	no_hit
ATP5F1C	P36542	ATP synthase subunit gamma, mitochondrial OS=Homo sapiens OX=9606 GN=ATP5F1C PE=1 SV=1	40941.7	13	8.58328	0.195607	0.430399	1.43491	0.18229	0.999039	-4.50907	CA	no_hit
KHSRP	A0A087WTP3|Q92945	Far upstream element-binding protein 2 OS=Homo sapiens OX=9606 GN=KHSRP PE=1 SV=1|Far upstream element-binding protein 2 OS=Homo sapiens OX=9606 GN=KHSRP PE=1 SV=4	82868.9|82785.5	26	8.26117	-0.334612	0.283099	-1.43394	0.18256	0.999039	-4.50931	CA	no_hit
CCDC22	O60826	Coiled-coil domain-containing protein 22 OS=Homo sapiens OX=9606 GN=CCDC22 PE=1 SV=1	79572.1	20	7.48987	0.210542	0.45542	1.43222	0.183041	0.999039	-4.50974	CA	no_hit
TRIM33	Q9UPN9|Q9UPN9-2	E3 ubiquitin-protein ligase TRIM33 OS=Homo sapiens OX=9606 GN=TRIM33 PE=1 SV=3|Isoform Beta of E3 ubiquitin-protein ligase TRIM33 OS=Homo sapiens OX=9606 GN=TRIM33	144092.0|141492.0	16	7.12008	-0.295778	-0.225905	-1.43214	0.183061	0.999039	-4.50976	CA	no_hit
CAPG	P40121|P40121-2	Macrophage-capping protein OS=Homo sapiens OX=9606 GN=CAPG PE=1 SV=2|Isoform 2 of Macrophage-capping protein OS=Homo sapiens OX=9606 GN=CAPG|Macrophage-capping protein OS=Homo sapiens OX=9606 GN=CAPG PE=1 SV=2	46060.6|44419.8	9	7.63459	0.375333	0.654489	1.43135	0.183282	0.999039	-4.50995	CA	no_hit
GMPPB	Q9Y5P6|Q9Y5P6-2	Mannose-1-phosphate guanyltransferase beta OS=Homo sapiens OX=9606 GN=GMPPB PE=1 SV=2|Isoform 2 of Mannose-1-phosphate guanyltransferase beta OS=Homo sapiens OX=9606 GN=GMPPB	44637.7|47841.3	9	7.60191	0.22814	0.19976	1.43133	0.183289	0.999039	-4.50996	CA	no_hit
CUL1	Q13616|A0A590UJ21	Cullin-1 OS=Homo sapiens OX=9606 GN=CUL1 PE=1 SV=2|Cullin-1 OS=Homo sapiens OX=9606 GN=CUL1 PE=1 SV=1|Cullin-1 OS=Homo sapiens OX=9606 GN=CUL1 PE=1 SV=2	110992.0|104682.0	30	7.85784	0.25171	0.043607	1.43067	0.183472	0.999039	-4.51012	CA	no_hit
RABL6	Q3YEC7|Q3YEC7-2	Rab-like protein 6 OS=Homo sapiens OX=9606 GN=RABL6 PE=1 SV=2|Isoform 2 of Rab-like protein 6 OS=Homo sapiens OX=9606 GN=RABL6|Rab-like protein 6 OS=Homo sapiens OX=9606 GN=RABL6 PE=1 SV=2	95299.2|95386.3	10	7.3578	-0.360012	-0.172089	-1.43056	0.183503	0.999039	-4.51015	CA	no_hit
PPFIBP2	E9PP16|Q8ND30|Q8ND30-2|Q8ND30-3	Liprin-beta-2 OS=Homo sapiens OX=9606 GN=PPFIBP2 PE=1 SV=1|Liprin-beta-2 OS=Homo sapiens OX=9606 GN=PPFIBP2 PE=1 SV=3|Isoform 2 of Liprin-beta-2 OS=Homo sapiens OX=9606 GN=PPFIBP2|Isoform 3 of Liprin-beta-2 OS=Homo sapiens OX=9606 GN=PPFIBP2	98213.2|117001.0|104310.0|100948.0	7	6.38136	0.204517	-0.200401	1.43055	0.183506	0.999039	-4.51015	CA	no_hit
PLD3	Q8IV08	5'-3' exonuclease PLD3 OS=Homo sapiens OX=9606 GN=PLD3 PE=1 SV=1	59994	6	7.33378	-0.33441	0.43527	-1.43008	0.183639	0.999039	-4.51027	CA	no_hit
IGHG1	A0A0A0MS07|A0A0A0MS08|P01857	Immunoglobulin heavy constant gamma 1 (Fragment) OS=Homo sapiens OX=9606 GN=IGHG1 PE=1 SV=1|Immunoglobulin heavy constant gamma 1 (Fragment) OS=Homo sapiens OX=9606 GN=IGHG1 PE=1 SV=1|Immunoglobulin heavy constant gamma 1 OS=Homo sapiens OX=9606 GN=IGHG1 PE=1 SV=1|Immunoglobulin heavy constant gamma 1 (Fragment) OS=Homo sapiens OX=9606 GN=IGHG1 PE=1 SV=1|Immunoglobulin heavy constant gamma 1 OS=H…	40081.4|53637.6|45114.2	4	6.68647	2.5182	0.0980162	1.43008	0.183639	0.999039	-4.51027	CA	no_hit
PTPRM	E7EPS8|P28827|P28827-2	Receptor-type tyrosine-protein phosphatase mu OS=Homo sapiens OX=9606 GN=PTPRM PE=1 SV=2|Receptor-type tyrosine-protein phosphatase mu OS=Homo sapiens OX=9606 GN=PTPRM PE=1 SV=2|Isoform 2 of Receptor-type tyrosine-protein phosphatase mu OS=Homo sapiens OX=9606 GN=PTPRM	178041.0|185120.0|186496.0	7	6.36397	-0.214711	0.182087	-1.42985	0.183702	0.999039	-4.51032	CA	no_hit
PSMC5	P62195|P62195-2	26S proteasome regulatory subunit 8 OS=Homo sapiens OX=9606 GN=PSMC5 PE=1 SV=1|Isoform 2 of 26S proteasome regulatory subunit 8 OS=Homo sapiens OX=9606 GN=PSMC5|26S proteasome regulatory subunit 8 OS=Homo sapiens OX=9606 GN=PSMC5 PE=1 SV=1	55806.9|54965.6	24	8.50064	0.206367	0.526824	1.42971	0.183742	0.999039	-4.51036	CA	no_hit
GPATCH8	Q9UKJ3|Q9UKJ3-2	G patch domain-containing protein 8 OS=Homo sapiens OX=9606 GN=GPATCH8 PE=1 SV=2|Isoform 2 of G patch domain-containing protein 8 OS=Homo sapiens OX=9606 GN=GPATCH8	203949.0|193429.0	9	6.85045	0.441956	-0.564473	1.42958	0.183778	0.999039	-4.51039	CA	no_hit
PLD2	O14939|O14939-4	Phospholipase D2 OS=Homo sapiens OX=9606 GN=PLD2 PE=1 SV=2|Isoform PLD2B of Phospholipase D2 OS=Homo sapiens OX=9606 GN=PLD2	118278.0|116588.0	4	6.59856	0.256683	-0.360764	1.42923	0.183876	0.999039	-4.51048	CA	no_hit
MED13L	A0A3B3IRX3|Q71F56	Mediator of RNA polymerase II transcription subunit 13 OS=Homo sapiens OX=9606 GN=MED13L PE=1 SV=1|Mediator of RNA polymerase II transcription subunit 13-like OS=Homo sapiens OX=9606 GN=MED13L PE=1 SV=1	275670.0|274255.0	5	6.14572	0.804761	-0.443844	1.4289	0.183967	0.999039	-4.51056	CA	no_hit
HAUS7	Q99871|Q99871-2|Q99871-3	HAUS augmin-like complex subunit 7 OS=Homo sapiens OX=9606 GN=HAUS7 PE=1 SV=3|Isoform 2 of HAUS augmin-like complex subunit 7 OS=Homo sapiens OX=9606 GN=HAUS7|Isoform 3 of HAUS augmin-like complex subunit 7 OS=Homo sapiens OX=9606 GN=HAUS7	47330.0|54531.8|42500.4	4	6.63657	-0.287041	0.164673	-1.42777	0.184284	0.999039	-4.51084	CA	no_hit
GRK2	P25098	Beta-adrenergic receptor kinase 1 OS=Homo sapiens OX=9606 GN=GRK2 PE=1 SV=2	96747.9	6	6.81134	0.27823	-0.0919409	1.42468	0.185152	0.999039	-4.5116	CA	no_hit
NSMCE3	Q96MG7	Non-structural maintenance of chromosomes element 3 homolog OS=Homo sapiens OX=9606 GN=NSMCE3 PE=1 SV=1	41340.6	7	7.15498	-0.376262	-0.390743	-1.42436	0.185243	0.999039	-4.51168	CA	no_hit
ADCY9	O60503	Adenylate cyclase type 9 OS=Homo sapiens OX=9606 GN=ADCY9 PE=1 SV=4	175643	3	6.5256	0.244724	0.0242157	1.42235	0.185808	0.999039	-4.51217	CA	no_hit
EMC6	Q9BV81	ER membrane protein complex subunit 6 OS=Homo sapiens OX=9606 GN=EMC6 PE=1 SV=1	13283.4	3	7.4095	0.170913	0.0152547	1.42197	0.185916	0.999039	-4.51227	CA	no_hit
S100A7	P31151	Protein S100-A7 OS=Homo sapiens OX=9606 GN=S100A7 PE=1 SV=4	15228.1	5	6.91822	1.54012	0.239248	1.42179	0.185967	0.999039	-4.51231	CA	no_hit
PPCS	Q9HAB8	Phosphopantothenate--cysteine ligase OS=Homo sapiens OX=9606 GN=PPCS PE=1 SV=2	37634.3	7	7.65653	0.193999	0.493334	1.42086	0.186232	0.999039	-4.51254	CA	no_hit
ATP6V1C1	P21283|E7EV59	V-type proton ATPase subunit C 1 OS=Homo sapiens OX=9606 GN=ATP6V1C1 PE=1 SV=4|V-type proton ATPase subunit C OS=Homo sapiens OX=9606 GN=ATP6V1C1 PE=1 SV=1|V-type proton ATPase subunit C 1 OS=Homo sapiens OX=9606 GN=ATP6V1C1 PE=1 SV=4	55644.9|44925.9	20	8.00408	0.184327	-0.112619	1.42059	0.186306	0.999039	-4.5126	CA	no_hit
XRCC1	F5H8D7|P18887	DNA repair protein XRCC1 OS=Homo sapiens OX=9606 GN=XRCC1 PE=1 SV=2|DNA repair protein XRCC1 OS=Homo sapiens OX=9606 GN=XRCC1 PE=1 SV=2|DNA repair protein XRCC1 OS=Homo sapiens OX=9606 GN=XRCC1 PE=1 SV=2	77209.6|81944.4	10	7.6018	-0.198097	-0.594985	-1.41929	0.186676	0.999039	-4.51293	CA	no_hit
POLR1E	Q9GZS1|Q9GZS1-1	DNA-directed RNA polymerase I subunit RPA49 OS=Homo sapiens OX=9606 GN=POLR1E PE=1 SV=3|Isoform 1 of DNA-directed RNA polymerase I subunit RPA49 OS=Homo sapiens OX=9606 GN=POLR1E|DNA-directed RNA polymerase I subunit RPA49 OS=Homo sapiens OX=9606 GN=POLR1E PE=1 SV=3	56812.8|63567.4	8	7.70965	0.304403	-2.26552	1.41919	0.186705	0.999039	-4.51295	CA	no_hit
IQSEC1	A0A3B3IRZ4	IQ motif and SEC7 domain-containing protein 1 OS=Homo sapiens OX=9606 GN=IQSEC1 PE=1 SV=1	154527	3	6.59683	-0.529999	-0.571534	-1.41781	0.187094	0.999039	-4.51329	CA	no_hit
DBT	P11182	Lipoamide acyltransferase component of branched-chain alpha-keto acid dehydrogenase complex, mitochondrial OS=Homo sapiens OX=9606 GN=DBT PE=1 SV=3	66324.6	8	7.12486	0.273497	-0.415868	1.41742	0.187206	0.999039	-4.51339	CA	no_hit
GPX4	A0A087WT12|A0A087X2I2|P36969|P36969-2|K7ERP4	Glutathione peroxidase OS=Homo sapiens OX=9606 GN=GPX4 PE=1 SV=1|Glutathione peroxidase OS=Homo sapiens OX=9606 GN=GPX4 PE=1 SV=1|Phospholipid hydroperoxide glutathione peroxidase OS=Homo sapiens OX=9606 GN=GPX4 PE=1 SV=3|Isoform Cytoplasmic of Phospholipid hydroperoxide glutathione peroxidase OS=Homo sapiens OX=9606 GN=GPX4|Glutathione peroxidase OS=Homo sapiens OX=9606 GN=GPX4 PE=1 SV=1|Glutath…	33642.1|27694.7|27845.7|24780.0|22827.2	5	6.70663	0.204369	0.124572	1.41728	0.187245	0.999039	-4.51342	CA	no_hit
ANKRD22	Q5VYY1	Ankyrin repeat domain-containing protein 22 OS=Homo sapiens OX=9606 GN=ANKRD22 PE=2 SV=1	26188.2	3	6.76769	0.402225	-0.0689475	1.41685	0.187369	0.999039	-4.51353	CA	no_hit
HSD17B8	Q92506	Estradiol 17-beta-dehydrogenase 8 OS=Homo sapiens OX=9606 GN=HSD17B8 PE=1 SV=2	29732.6	4	6.84019	0.209159	0.16419	1.41608	0.187587	0.999039	-4.51371	CA	no_hit
CGGBP1	Q9UFW8	CGG triplet repeat-binding protein 1 OS=Homo sapiens OX=9606 GN=CGGBP1 PE=1 SV=2	23352.6	3	6.72383	-0.356476	-0.122539	-1.41555	0.187737	0.999039	-4.51384	CA	no_hit
WDR37	A0A087WTQ2|A0A3B3IT47|C9JGR9|E7EQ49|Q9Y2I8|Q9Y2I8-2|Q9Y2I8-3	WD repeat-containing protein 37 OS=Homo sapiens OX=9606 GN=WDR37 PE=1 SV=1|WD repeat-containing protein 37 OS=Homo sapiens OX=9606 GN=WDR37 PE=1 SV=1|WD repeat-containing protein 37 (Fragment) OS=Homo sapiens OX=9606 GN=WDR37 PE=1 SV=1|WD repeat-containing protein 37 OS=Homo sapiens OX=9606 GN=WDR37 PE=1 SV=1|WD repeat-containing protein 37 OS=Homo sapiens OX=9606 GN=WDR37 PE=1 SV=2|Isoform 2 of …	34490.6|71950.5|27300.6|32763.7|62616.8|62744.8|34646.7	6	6.83605	-0.45557	-0.785934	-1.4154	0.187781	0.999039	-4.51388	CA	no_hit
TACC1	O75410|O75410-7|O75410-9	Transforming acidic coiled-coil-containing protein 1 OS=Homo sapiens OX=9606 GN=TACC1 PE=1 SV=2|Isoform 7 of Transforming acidic coiled-coil-containing protein 1 OS=Homo sapiens OX=9606 GN=TACC1|Isoform 9 of Transforming acidic coiled-coil-containing protein 1 OS=Homo sapiens OX=9606 GN=TACC1	109282.0|101307.0|106056.0	21	7.47668	-0.327381	0.563706	-1.41485	0.187938	0.999039	-4.51402	CA	no_hit
LMAN1	P49257	Protein ERGIC-53 OS=Homo sapiens OX=9606 GN=LMAN1 PE=1 SV=2	66924.3	17	8.41979	0.219781	0.252449	1.41483	0.187944	0.999039	-4.51402	CA	no_hit
SNRPE	P62304	Small nuclear ribonucleoprotein E OS=Homo sapiens OX=9606 GN=SNRPE PE=1 SV=1	12678.9	4	7.18698	-0.375458	-0.164242	-1.41455	0.188023	0.999039	-4.51409	CA	no_hit
SWAP70	Q9UH65	Switch-associated protein 70 OS=Homo sapiens OX=9606 GN=SWAP70 PE=1 SV=1	89735.5	17	7.49789	0.222383	0.00357086	1.41427	0.188104	0.999039	-4.51416	CA	no_hit
DLST	P36957	Dihydrolipoyllysine-residue succinyltransferase component of 2-oxoglutarate dehydrogenase complex, mitochondrial OS=Homo sapiens OX=9606 GN=DLST PE=1 SV=4	57280.2	16	8.5456	0.282577	0.675793	1.41357	0.188302	0.999039	-4.51433	CA	no_hit
PKN1	Q16512|Q16512-2	Serine/threonine-protein kinase N1 OS=Homo sapiens OX=9606 GN=PKN1 PE=1 SV=2|Isoform 2 of Serine/threonine-protein kinase N1 OS=Homo sapiens OX=9606 GN=PKN1	117138.0|117879.0	16	7.33976	0.162672	-0.0531979	1.41357	0.188304	0.999039	-4.51433	CA	no_hit
CCAR1	Q8IX12|Q8IX12-2	Cell division cycle and apoptosis regulator protein 1 OS=Homo sapiens OX=9606 GN=CCAR1 PE=1 SV=2|Isoform 2 of Cell division cycle and apoptosis regulator protein 1 OS=Homo sapiens OX=9606 GN=CCAR1	163540.0|161763.0	18	7.80185	-0.542591	-1.0342	-1.41337	0.188359	0.999039	-4.51438	CA	no_hit
TTC37	Q6PGP7	Tetratricopeptide repeat protein 37 OS=Homo sapiens OX=9606 GN=TTC37 PE=1 SV=1	215815	29	7.53165	0.260119	-0.109804	1.4123	0.188665	0.999039	-4.51464	CA	no_hit
GNPDA2	Q8TDQ7|Q8TDQ7-2|Q8TDQ7-3	Glucosamine-6-phosphate isomerase 2 OS=Homo sapiens OX=9606 GN=GNPDA2 PE=1 SV=1|Isoform 2 of Glucosamine-6-phosphate isomerase 2 OS=Homo sapiens OX=9606 GN=GNPDA2|Isoform 3 of Glucosamine-6-phosphate isomerase 2 OS=Homo sapiens OX=9606 GN=GNPDA2|Glucosamine-6-phosphate isomerase 2 OS=Homo sapiens OX=9606 GN=GNPDA2 PE=1 SV=1	37376.8|37247.8|34858.4	5	7.08664	0.213466	0.432683	1.41052	0.189176	0.999039	-4.51508	CA	no_hit
GNPDA1	P46926	Glucosamine-6-phosphate isomerase 1 OS=Homo sapiens OX=9606 GN=GNPDA1 PE=1 SV=1	40423.8	9	7.89698	0.22985	0.317387	1.41008	0.189301	0.999039	-4.51519	CA	no_hit
PPP1R8	Q12972	Nuclear inhibitor of protein phosphatase 1 OS=Homo sapiens OX=9606 GN=PPP1R8 PE=1 SV=2	46839.5	5	6.85988	-0.276107	0.468425	-1.41007	0.189306	0.999039	-4.51519	CA	no_hit
VPS37A	Q8NEZ2|Q8NEZ2-2|H0YBN0	Vacuolar protein sorting-associated protein 37A OS=Homo sapiens OX=9606 GN=VPS37A PE=1 SV=1|Isoform 2 of Vacuolar protein sorting-associated protein 37A OS=Homo sapiens OX=9606 GN=VPS37A|Vacuolar protein sorting-associated protein 37A (Fragment) OS=Homo sapiens OX=9606 GN=VPS37A PE=1 SV=1|Vacuolar protein sorting-associated protein 37A OS=Homo sapiens OX=9606 GN=VPS37A PE=1 SV=1|Isoform 2 of Vacu…	51454.4|48293.6|24024.8	3	6.95407	-0.432257	0.750955	-1.40926	0.189538	0.999039	-4.51539	CA	no_hit
AMFR	Q9UKV5|H3BRK9	E3 ubiquitin-protein ligase AMFR OS=Homo sapiens OX=9606 GN=AMFR PE=1 SV=2|E3 ubiquitin-protein ligase AMFR (Fragment) OS=Homo sapiens OX=9606 GN=AMFR PE=1 SV=1|E3 ubiquitin-protein ligase AMFR OS=Homo sapiens OX=9606 GN=AMFR PE=1 SV=2	77701.8|33698.5	4	6.73538	0.4244	0.240231	1.40903	0.189603	0.999039	-4.51544	CA	no_hit
NDUFA10	A0A087WXC5|E7ESZ7|O95299	NADH dehydrogenase [ubiquinone] 1 alpha subcomplex subunit 10, mitochondrial OS=Homo sapiens OX=9606 GN=NDUFA10 PE=1 SV=1|NADH dehydrogenase [ubiquinone] 1 alpha subcomplex subunit 10, mitochondrial OS=Homo sapiens OX=9606 GN=NDUFA10 PE=1 SV=1|NADH dehydrogenase [ubiquinone] 1 alpha subcomplex subunit 10, mitochondrial OS=Homo sapiens OX=9606 GN=NDUFA10 PE=1 SV=1	49670.9|53570.0|49584.9	14	8.10886	0.183296	0.385827	1.40843	0.189774	0.999039	-4.51559	CA	no_hit
MIER1	Q8N108|Q8N108-12|Q8N108-13|Q8N108-14|Q8N108-15|Q8N108-16|Q8N108-17|Q8N108-18	Mesoderm induction early response protein 1 OS=Homo sapiens OX=9606 GN=MIER1 PE=1 SV=2|Isoform 2 of Mesoderm induction early response protein 1 OS=Homo sapiens OX=9606 GN=MIER1|Isoform 3 of Mesoderm induction early response protein 1 OS=Homo sapiens OX=9606 GN=MIER1|Isoform 4 of Mesoderm induction early response protein 1 OS=Homo sapiens OX=9606 GN=MIER1|Isoform 5 of Mesoderm induction early resp…	67720.2|73521.0|70034.3|58720.6|62207.3|56406.5|65030.2|61486.1	4	6.61216	-0.286145	-0.195675	-1.40833	0.189805	0.999039	-4.51562	CA	no_hit
TBC1D9B	Q66K14|Q66K14-2	TBC1 domain family member 9B OS=Homo sapiens OX=9606 GN=TBC1D9B PE=1 SV=3|Isoform 2 of TBC1 domain family member 9B OS=Homo sapiens OX=9606 GN=TBC1D9B	162566.0|160712.0	20	7.32221	0.191689	0.13166	1.40623	0.190409	0.999039	-4.51613	CA	no_hit
SMTN	A0A087WVP4|P53814-5|P53814-6|A0A087X1R1|P53814	Smoothelin OS=Homo sapiens OX=9606 GN=SMTN PE=1 SV=1|Isoform B2 of Smoothelin OS=Homo sapiens OX=9606 GN=SMTN|Isoform B3 of Smoothelin OS=Homo sapiens OX=9606 GN=SMTN|Smoothelin OS=Homo sapiens OX=9606 GN=SMTN PE=1 SV=1|Smoothelin OS=Homo sapiens OX=9606 GN=SMTN PE=1 SV=7|Isoform B2 of Smoothelin OS=Homo sapiens OX=9606 GN=SMTN|Isoform B3 of Smoothelin OS=Homo sapiens OX=9606 GN=SMTN	117748.0|111902.0|114790.0|121240.0|111680.0	8	6.69471	-0.243095	-0.559179	-1.40536	0.19066	0.999039	-4.51634	CA	no_hit
PSMA1	P25786|P25786-2	Proteasome subunit alpha type-1 OS=Homo sapiens OX=9606 GN=PSMA1 PE=1 SV=1|Isoform Long of Proteasome subunit alpha type-1 OS=Homo sapiens OX=9606 GN=PSMA1	33472.4|34764.3	18	8.69224	0.249376	0.677714	1.40382	0.191106	0.999039	-4.51672	CA	no_hit
CMC1	Q7Z7K0	COX assembly mitochondrial protein homolog OS=Homo sapiens OX=9606 GN=CMC1 PE=1 SV=1	17386.5	2	7.59393	0.71573	1.69133	1.40344	0.191215	0.999039	-4.51681	CA	no_hit
PEPD	P12955	Xaa-Pro dipeptidase OS=Homo sapiens OX=9606 GN=PEPD PE=1 SV=3	61091.1	19	8.05422	0.212449	0.297521	1.40275	0.191415	0.999039	-4.51698	CA	no_hit
DIAPH2	A6NML8|C9J6U3|K4DI95|O60879|O60879-2|O60879-3	Diaphanous homolog 2 (Drosophila), isoform CRA_c OS=Homo sapiens OX=9606 GN=DIAPH2 PE=1 SV=3|Protein diaphanous homolog 2 OS=Homo sapiens OX=9606 GN=DIAPH2 PE=1 SV=3|Diaphanous homolog 2 (Drosophila), isoform CRA_a OS=Homo sapiens OX=9606 GN=DIAPH2 PE=1 SV=1|Protein diaphanous homolog 2 OS=Homo sapiens OX=9606 GN=DIAPH2 PE=1 SV=1|Isoform 2 of Protein diaphanous homolog 2 OS=Homo sapiens OX=9606 G…	155994.0|156982.0|156956.0|155967.0|156430.0	20	7.35748	0.219935	0.10119	1.40263	0.19145	0.999039	-4.51701	CA	no_hit
ATP5F1A	P25705|P25705-2	ATP synthase subunit alpha, mitochondrial OS=Homo sapiens OX=9606 GN=ATP5F1A PE=1 SV=1|Isoform 2 of ATP synthase subunit alpha, mitochondrial OS=Homo sapiens OX=9606 GN=ATP5F1A	68953.9|63395.8	30	9.17067	0.203469	0.612423	1.40119	0.191867	0.999039	-4.51737	CA	no_hit
ACOT13	Q9NPJ3|Q9NPJ3-2	Acyl-coenzyme A thioesterase 13 OS=Homo sapiens OX=9606 GN=ACOT13 PE=1 SV=1|Isoform 2 of Acyl-coenzyme A thioesterase 13 OS=Homo sapiens OX=9606 GN=ACOT13	18411.2|15210.4	4	7.48071	-0.241611	0.143073	-1.40007	0.192191	0.999039	-4.51764	CA	no_hit
LRRFIP2	Q9Y608|Q9Y608-4	Leucine-rich repeat flightless-interacting protein 2 OS=Homo sapiens OX=9606 GN=LRRFIP2 PE=1 SV=1|Leucine-rich repeat flightless-interacting protein 2 OS=Homo sapiens OX=9606 GN=LRRFIP2 PE=1 SV=1|Isoform 4 of Leucine-rich repeat flightless-interacting protein 2 OS=Homo sapiens OX=9606 GN=LRRFIP2	98776.6|59634.3	12	7.5904	-0.411789	0.764183	-1.3988	0.192562	0.999039	-4.51795	CA	no_hit
TANGO6	Q9C0B7	Transport and Golgi organization protein 6 homolog OS=Homo sapiens OX=9606 GN=TANGO6 PE=1 SV=2	139246	7	6.50791	0.215211	-0.124146	1.39835	0.192694	0.999039	-4.51806	CA	no_hit
TBL1XR1	Q9BZK7	F-box-like/WD repeat-containing protein TBL1XR1 OS=Homo sapiens OX=9606 GN=TBL1XR1 PE=1 SV=1	63184.1	5	7.3549	-0.591313	-0.931928	-1.3981	0.192765	0.999039	-4.51812	CA	no_hit
MAP2K3	P46734|P46734-2|P46734-3	Dual specificity mitogen-activated protein kinase kinase 3 OS=Homo sapiens OX=9606 GN=MAP2K3 PE=1 SV=2|Dual specificity mitogen-activated protein kinase kinase 3 OS=Homo sapiens OX=9606 GN=MAP2K3 PE=1 SV=2|Isoform 1 of Dual specificity mitogen-activated protein kinase kinase 3 OS=Homo sapiens OX=9606 GN=MAP2K3|Isoform 2 of Dual specificity mitogen-activated protein kinase kinase 3 OS=Homo sapiens…	47544.4|42822.8|47861.7	8	7.34506	0.214383	0.144357	1.39654	0.19322	0.999039	-4.5185	CA	no_hit
TARDBP	Q13148	TAR DNA-binding protein 43 OS=Homo sapiens OX=9606 GN=TARDBP PE=1 SV=1	51137.6	12	8.11284	0.16843	-0.00434075	1.39582	0.193432	0.999039	-4.51868	CA	no_hit
SEC23B	A0A2R8YFH5|Q15437	Protein transport protein SEC23 OS=Homo sapiens OX=9606 GN=SEC23B PE=1 SV=1|Protein transport protein Sec23B OS=Homo sapiens OX=9606 GN=SEC23B PE=1 SV=2	94152.8|96214.9	15	7.65408	-0.258819	-0.397258	-1.39476	0.19374	0.999039	-4.51894	CA	no_hit
ASS1	P00966	Argininosuccinate synthase OS=Homo sapiens OX=9606 GN=ASS1 PE=1 SV=2	56824.9	14	7.78849	0.425921	0.227571	1.39446	0.193829	0.999039	-4.51901	CA	no_hit
SMARCC2	F8VXC8|Q8TAQ2-2|Q8TAQ2-3	SWI/SNF complex subunit SMARCC2 OS=Homo sapiens OX=9606 GN=SMARCC2 PE=1 SV=1|Isoform 2 of SWI/SNF complex subunit SMARCC2 OS=Homo sapiens OX=9606 GN=SMARCC2|Isoform 3 of SWI/SNF complex subunit SMARCC2 OS=Homo sapiens OX=9606 GN=SMARCC2	166007.0|154671.0|156753.0	21	7.79042	-0.486743	-0.863541	-1.39421	0.193903	0.999039	-4.51907	CA	no_hit
CNOT4	O95628|O95628-10|O95628-2|O95628-3|O95628-4|O95628-6|O95628-7|O95628-8|O95628-9	CCR4-NOT transcription complex subunit 4 OS=Homo sapiens OX=9606 GN=CNOT4 PE=1 SV=3|Isoform 10 of CCR4-NOT transcription complex subunit 4 OS=Homo sapiens OX=9606 GN=CNOT4|Isoform 2 of CCR4-NOT transcription complex subunit 4 OS=Homo sapiens OX=9606 GN=CNOT4|Isoform 3 of CCR4-NOT transcription complex subunit 4 OS=Homo sapiens OX=9606 GN=CNOT4|Isoform 4 of CCR4-NOT transcription complex subunit 4…	74193.4|89539.8|73745.2|71917.3|81770.1|96861.6|85923.3|81321.9|89091.6	4	6.69644	-0.187127	0.339555	-1.39261	0.19437	0.999039	-4.51946	CA	no_hit
PDLIM7	Q9NR12	PDZ and LIM domain protein 7 OS=Homo sapiens OX=9606 GN=PDLIM7 PE=1 SV=1	59413.8	14	7.59206	-0.235575	0.0159142	-1.38991	0.195164	0.999039	-4.52012	CA	no_hit
SP100	P23497	Nuclear autoantigen Sp-100 OS=Homo sapiens OX=9606 GN=SP100 PE=1 SV=3	131611	3	6.53058	-0.409489	-1.18378	-1.3897	0.195227	0.999039	-4.52017	CA	no_hit
TRIR	Q9BQ61	Telomerase RNA component interacting RNase OS=Homo sapiens OX=9606 GN=TRIR PE=1 SV=1	23636.8	2	7.37158	-0.720256	0.669325	-1.38912	0.195398	0.999039	-4.52031	CA	no_hit
PPP2R5A	Q15172|Q15172-2	Serine/threonine-protein phosphatase 2A 56 kDa regulatory subunit alpha isoform OS=Homo sapiens OX=9606 GN=PPP2R5A PE=1 SV=1|Isoform 2 of Serine/threonine-protein phosphatase 2A 56 kDa regulatory subunit alpha isoform OS=Homo sapiens OX=9606 GN=PPP2R5A|Serine/threonine-protein phosphatase 2A 56 kDa regulatory subunit alpha isoform OS=Homo sapiens OX=9606 GN=PPP2R5A PE=1 SV=1	69277.0|61809.9	6	6.93595	0.223183	0.101533	1.38908	0.195409	0.999039	-4.52032	CA	no_hit
POMT1	Q5JT02|Q9Y6A1|Q9Y6A1-2|Q9Y6A1-3|Q9Y6A1-4	Protein O-mannosyl-transferase 1 (Fragment) OS=Homo sapiens OX=9606 GN=POMT1 PE=1 SV=1|Protein O-mannosyl-transferase 1 OS=Homo sapiens OX=9606 GN=POMT1 PE=1 SV=3|Isoform 2 of Protein O-mannosyl-transferase 1 OS=Homo sapiens OX=9606 GN=POMT1|Isoform 3 of Protein O-mannosyl-transferase 1 OS=Homo sapiens OX=9606 GN=POMT1|Isoform 4 of Protein O-mannosyl-transferase 1 OS=Homo sapiens OX=9606 GN=POMT1	42675.7|90852.5|88369.5|81797.0|74733.3	2	6.71163	0.208729	0.169429	1.38879	0.195494	0.999039	-4.52039	CA	no_hit
PLCG1	P19174-2	Isoform 2 of 1-phosphatidylinositol 4,5-bisphosphate phosphodiesterase gamma-1 OS=Homo sapiens OX=9606 GN=PLCG1	171780	21	7.27616	0.244572	0.105567	1.38834	0.195627	0.999039	-4.5205	CA	no_hit
VPS51	E9PJ36|Q9UID3|Q9UID3-2	Vacuolar protein sorting-associated protein 51 homolog (Fragment) OS=Homo sapiens OX=9606 GN=VPS51 PE=1 SV=1|Vacuolar protein sorting-associated protein 51 homolog OS=Homo sapiens OX=9606 GN=VPS51 PE=1 SV=2|Vacuolar protein sorting-associated protein 51 homolog OS=Homo sapiens OX=9606 GN=VPS51 PE=1 SV=2|Isoform 2 of Vacuolar protein sorting-associated protein 51 homolog OS=Homo sapiens OX=9606 GN…	31413.3|94810.0|79853.4	9	7.40892	0.207229	-0.127982	1.38805	0.195713	0.999039	-4.52058	CA	no_hit
TRAF6	Q9Y4K3	TNF receptor-associated factor 6 OS=Homo sapiens OX=9606 GN=TRAF6 PE=1 SV=1	68241.1	4	6.76502	0.210554	-0.0631209	1.38769	0.195818	0.999039	-4.52066	CA	no_hit
DNAJB14	Q8TBM8	DnaJ homolog subfamily B member 14 OS=Homo sapiens OX=9606 GN=DNAJB14 PE=1 SV=1	53288.3	8	7.07061	-0.325355	0.0419524	-1.38638	0.196206	0.999039	-4.52098	CA	no_hit
COG2	Q14746|Q14746-2	Conserved oligomeric Golgi complex subunit 2 OS=Homo sapiens OX=9606 GN=COG2 PE=1 SV=1|Isoform 2 of Conserved oligomeric Golgi complex subunit 2 OS=Homo sapiens OX=9606 GN=COG2	99848.5|99777.5	17	7.13199	0.179823	0.205309	1.38627	0.196238	0.999039	-4.52101	CA	no_hit
PTER	Q96BW5|Q96BW5-2	Phosphotriesterase-related protein OS=Homo sapiens OX=9606 GN=PTER PE=1 SV=1|Isoform 2 of Phosphotriesterase-related protein OS=Homo sapiens OX=9606 GN=PTER	45894.6|39346.1	7	7.50405	0.198301	0.295603	1.38559	0.196439	0.999039	-4.52117	CA	no_hit
MBLAC2	Q68D91	Metallo-beta-lactamase domain-containing protein 2 OS=Homo sapiens OX=9606 GN=MBLAC2 PE=1 SV=3	33652.5	8	7.18424	0.15461	0.0790727	1.38554	0.196454	0.999039	-4.52119	CA	no_hit
SURF2	Q15527	Surfeit locus protein 2 OS=Homo sapiens OX=9606 GN=SURF2 PE=1 SV=3	37082	2	7.04817	-0.407434	0.147217	-1.38549	0.19647	0.999039	-4.5212	CA	no_hit
SARAF	E5RHW0|H0YBH7|Q96BY9|H0YAN9	Store-operated calcium entry-associated regulatory factor (Fragment) OS=Homo sapiens OX=9606 GN=SARAF PE=1 SV=1|Store-operated calcium entry-associated regulatory factor (Fragment) OS=Homo sapiens OX=9606 GN=SARAF PE=1 SV=1|Store-operated calcium entry-associated regulatory factor OS=Homo sapiens OX=9606 GN=SARAF PE=1 SV=1|Store-operated calcium entry-associated regulatory factor (Fragment) OS=Ho…	27140.9|42627.1|41780.8|27923.2	4	6.55004	-0.192901	0.0397783	-1.38519	0.196559	0.999039	-4.52127	CA	no_hit
KYNU	Q16719	Kynureninase OS=Homo sapiens OX=9606 GN=KYNU PE=1 SV=1	64391.3	21	8.80456	0.246422	0.214032	1.38485	0.19666	0.999039	-4.52135	CA	no_hit
NEBL	O76041-2	Isoform 2 of Nebulette OS=Homo sapiens OX=9606 GN=NEBL	37355.2	4	6.9204	-0.205425	0.352566	-1.38464	0.196721	0.999039	-4.5214	CA	no_hit
PHGDH	A0A286YF22|O43175|A0A2C9F2M7	D-3-phosphoglycerate dehydrogenase OS=Homo sapiens OX=9606 GN=PHGDH PE=1 SV=1|D-3-phosphoglycerate dehydrogenase OS=Homo sapiens OX=9606 GN=PHGDH PE=1 SV=4|D-3-phosphoglycerate dehydrogenase OS=Homo sapiens OX=9606 GN=PHGDH PE=1 SV=1|D-3-phosphoglycerate dehydrogenase OS=Homo sapiens OX=9606 GN=PHGDH PE=1 SV=1|D-3-phosphoglycerate dehydrogenase OS=Homo sapiens OX=9606 GN=PHGDH PE=1 SV=4	64249.5|65265.1|64479.7	14	7.87592	0.218692	0.315948	1.38417	0.19686	0.999039	-4.52152	CA	no_hit
MIPEP	Q99797	Mitochondrial intermediate peptidase OS=Homo sapiens OX=9606 GN=MIPEP PE=1 SV=2	92034.4	17	7.62033	0.220305	0.0882567	1.38377	0.196979	0.999039	-4.52162	CA	no_hit
TNFRSF10A	O00220	Tumor necrosis factor receptor superfamily member 10A OS=Homo sapiens OX=9606 GN=TNFRSF10A PE=1 SV=3	56425.7	4	7.09734	0.280407	0.225291	1.38336	0.197101	0.999039	-4.52172	CA	no_hit
PHC3	Q8NDX5|Q8NDX5-2|Q8NDX5-7	Polyhomeotic-like protein 3 OS=Homo sapiens OX=9606 GN=PHC3 PE=1 SV=1|Isoform 2 of Polyhomeotic-like protein 3 OS=Homo sapiens OX=9606 GN=PHC3|Isoform 7 of Polyhomeotic-like protein 3 OS=Homo sapiens OX=9606 GN=PHC3	114803.0|112821.0|116425.0	3	6.69245	-1.01004	-1.33223	-1.38318	0.197155	0.999039	-4.52176	CA	no_hit
PDCD10	C9J5C3|Q9BUL8	Programmed cell death protein 10 (Fragment) OS=Homo sapiens OX=9606 GN=PDCD10 PE=1 SV=1|Programmed cell death protein 10 OS=Homo sapiens OX=9606 GN=PDCD10 PE=1 SV=1	29655.3|31074.2	7	7.65876	0.18691	0.333668	1.38287	0.197245	0.999039	-4.52184	CA	no_hit
FLII	Q13045|Q13045-2	Protein flightless-1 homolog OS=Homo sapiens OX=9606 GN=FLII PE=1 SV=2|Isoform 2 of Protein flightless-1 homolog OS=Homo sapiens OX=9606 GN=FLII	172000.0|165745.0	36	7.86564	0.224816	-0.269522	1.38252	0.197351	0.999039	-4.52192	CA	no_hit
STXBP1	A0A1B0GVQ5|A0A1B0GWF2|P61764|P61764-2|A0A0D9SG72|A0A1B0GTP9|A0A2R8Y5D4	Syntaxin-binding protein 1 OS=Homo sapiens OX=9606 GN=STXBP1 PE=1 SV=1|Syntaxin-binding protein 1 OS=Homo sapiens OX=9606 GN=STXBP1 PE=1 SV=1|Syntaxin-binding protein 1 OS=Homo sapiens OX=9606 GN=STXBP1 PE=1 SV=1|Isoform 2 of Syntaxin-binding protein 1 OS=Homo sapiens OX=9606 GN=STXBP1|Syntaxin-binding protein 1 OS=Homo sapiens OX=9606 GN=STXBP1 PE=1 SV=2|Syntaxin-binding protein 1 OS=Homo sapien…	80750.0|80175.6|83743.8|83997.5|81728.5|81982.3|80622.6	15	7.16884	0.241615	-0.0292029	1.38237	0.197395	0.999039	-4.52196	CA	no_hit
WBP11	Q9Y2W2	WW domain-binding protein 11 OS=Homo sapiens OX=9606 GN=WBP11 PE=1 SV=1	85164.3	17	7.71138	-0.191693	-0.149751	-1.38233	0.197406	0.999039	-4.52197	CA	no_hit
TMEM87B	A0A494BZZ8|Q96K49|Q96K49-2	Transmembrane protein 87B (Fragment) OS=Homo sapiens OX=9606 GN=TMEM87B PE=1 SV=1|Transmembrane protein 87B OS=Homo sapiens OX=9606 GN=TMEM87B PE=1 SV=1|Isoform 2 of Transmembrane protein 87B OS=Homo sapiens OX=9606 GN=TMEM87B	72169.5|73001.0|72869.9	4	7.00892	0.267141	0.21431	1.3822	0.197446	0.999039	-4.522	CA	no_hit
UFD1	Q92890|Q92890-1	Ubiquitin recognition factor in ER-associated degradation protein 1 OS=Homo sapiens OX=9606 GN=UFD1 PE=1 SV=3|Isoform Long of Ubiquitin recognition factor in ER-associated degradation protein 1 OS=Homo sapiens OX=9606 GN=UFD1	41456.0|46343.5	9	8.05358	0.263193	0.581602	1.38218	0.197451	0.999039	-4.522	CA	no_hit
AGL	P35573	Glycogen debranching enzyme OS=Homo sapiens OX=9606 GN=AGL PE=1 SV=3	202068	33	7.3834	0.371463	-0.453622	1.38192	0.197529	0.999039	-4.52207	CA	no_hit
H1-3	P16402	Histone H1.3 OS=Homo sapiens OX=9606 GN=H1-3 PE=1 SV=2	40892.9	7	8.5009	-0.495756	-4.15057	-1.38127	0.197724	0.999039	-4.52223	CA	no_hit
ZYG11B	A8DPD7|Q9C0D3	Protein zyg-11 homolog B OS=Homo sapiens OX=9606 GN=ZYG11B PE=1 SV=1|Protein zyg-11 homolog B OS=Homo sapiens OX=9606 GN=ZYG11B PE=1 SV=2	73396.5|96206.3	4	6.66042	0.188814	0.00186391	1.38114	0.197761	0.999039	-4.52226	CA	no_hit
POF1B	Q8WVV4|Q8WVV4-1	Protein POF1B OS=Homo sapiens OX=9606 GN=POF1B PE=1 SV=3|Isoform 1 of Protein POF1B OS=Homo sapiens OX=9606 GN=POF1B	79525.0|80155.3	18	7.48053	0.988731	-1.20887	1.38087	0.197843	0.999039	-4.52232	CA	no_hit
DPF2	J3KMZ8|Q92785	Zinc finger protein ubi-d4 OS=Homo sapiens OX=9606 GN=DPF2 PE=1 SV=1|Zinc finger protein ubi-d4 OS=Homo sapiens OX=9606 GN=DPF2 PE=1 SV=2	57234.5|54698.0	6	6.97892	-0.564485	-0.457235	-1.3803	0.198013	0.999039	-4.52246	CA	no_hit
ZW10	O43264	Centromere/kinetochore protein zw10 homolog OS=Homo sapiens OX=9606 GN=ZW10 PE=1 SV=3	107272	14	7.61541	0.23038	0.0418835	1.37977	0.198168	0.999039	-4.52259	CA	no_hit
DNAJC1	Q96KC8	DnaJ homolog subfamily C member 1 OS=Homo sapiens OX=9606 GN=DNAJC1 PE=1 SV=1	80308.5	14	7.57447	0.176431	0.0721031	1.37942	0.198273	0.999039	-4.52267	CA	no_hit
ZFYVE1	G3V5N8|Q9HBF4|Q9HBF4-3	Zinc finger FYVE domain-containing protein 1 OS=Homo sapiens OX=9606 GN=ZFYVE1 PE=1 SV=1|Zinc finger FYVE domain-containing protein 1 OS=Homo sapiens OX=9606 GN=ZFYVE1 PE=1 SV=1|Isoform 3 of Zinc finger FYVE domain-containing protein 1 OS=Homo sapiens OX=9606 GN=ZFYVE1	105059.0|103451.0|101754.0	6	6.49984	0.210215	0.150602	1.37817	0.198648	0.999039	-4.52298	CA	no_hit
BICC1	Q9H694	Protein bicaudal C homolog 1 OS=Homo sapiens OX=9606 GN=BICC1 PE=1 SV=2	123962	8	7.10898	-0.210785	-0.103964	-1.37813	0.198658	0.999039	-4.52299	CA	no_hit
FEN1	P39748	Flap endonuclease 1 OS=Homo sapiens OX=9606 GN=FEN1 PE=1 SV=1	54468.1	14	8.45035	0.161332	0.209026	1.37787	0.198738	0.999039	-4.52305	CA	no_hit
NDE1	I3L2R9|I3L522|Q9NXR1|Q9NXR1-1	Nuclear distribution protein nudE homolog 1 (Fragment) OS=Homo sapiens OX=9606 GN=NDE1 PE=1 SV=1|Nuclear distribution protein nudE homolog 1 (Fragment) OS=Homo sapiens OX=9606 GN=NDE1 PE=1 SV=1|Nuclear distribution protein nudE homolog 1 OS=Homo sapiens OX=9606 GN=NDE1 PE=1 SV=3|Isoform 2 of Nuclear distribution protein nudE homolog 1 OS=Homo sapiens OX=9606 GN=NDE1	21070.2|24061.8|43344.6|44925.7	2	6.36303	-0.468737	0.597728	-1.37783	0.198748	0.999039	-4.52306	CA	no_hit
DMAP1	Q9NPF5	DNA methyltransferase 1-associated protein 1 OS=Homo sapiens OX=9606 GN=DMAP1 PE=1 SV=1	68341.2	8	6.98104	-0.450429	-1.65191	-1.37744	0.198866	0.999039	-4.52316	CA	no_hit
MT-ATP8	P03928	ATP synthase protein 8 OS=Homo sapiens OX=9606 GN=MT-ATP8 PE=1 SV=1	10172.6	3	7.02144	-0.47164	0.798735	-1.37741	0.198875	0.999039	-4.52316	CA	no_hit
NME6	A0A0C4DG91|A0A2R8Y547|A0A2R8Y7V2|C9J9V6|C9JQB1|O75414|O75414-2	Nucleoside diphosphate kinase OS=Homo sapiens OX=9606 GN=NME6 PE=1 SV=1|Nucleoside diphosphate kinase OS=Homo sapiens OX=9606 GN=NME6 PE=1 SV=1|Nucleoside diphosphate kinase OS=Homo sapiens OX=9606 GN=NME6 PE=1 SV=1|Nucleoside diphosphate kinase (Fragment) OS=Homo sapiens OX=9606 GN=NME6 PE=1 SV=1|Nucleoside diphosphate kinase OS=Homo sapiens OX=9606 GN=NME6 PE=1 SV=1|Nucleoside diphosphate kinas…	23377.1|9638.58|12903.4|21436.2|16957.4|22516.7|14585.5	2	6.60055	0.212443	0.391112	1.3769	0.199028	0.999039	-4.52329	CA	no_hit
DTYMK	P23919	Thymidylate kinase OS=Homo sapiens OX=9606 GN=DTYMK PE=1 SV=4	28842.8	13	7.95645	0.1573	0.246796	1.37594	0.199316	0.999039	-4.52352	CA	no_hit
VPS52	Q8N1B4	Vacuolar protein sorting-associated protein 52 homolog OS=Homo sapiens OX=9606 GN=VPS52 PE=1 SV=1	90725.3	8	7.21061	0.22427	-0.0252724	1.37593	0.199318	0.999039	-4.52352	CA	no_hit
GNB1	P62873|P62873-2	Guanine nucleotide-binding protein G(I)/G(S)/G(T) subunit beta-1 OS=Homo sapiens OX=9606 GN=GNB1 PE=1 SV=3|Guanine nucleotide-binding protein G(I)/G(S)/G(T) subunit beta-1 OS=Homo sapiens OX=9606 GN=GNB1 PE=1 SV=3|Isoform 2 of Guanine nucleotide-binding protein G(I)/G(S)/G(T) subunit beta-1 OS=Homo sapiens OX=9606 GN=GNB1	41193.4|39810.7	4	7.90597	0.160057	0.0152719	1.37579	0.199359	0.999039	-4.52356	CA	no_hit
CRAT	P43155|P43155-2	Carnitine O-acetyltransferase OS=Homo sapiens OX=9606 GN=CRAT PE=1 SV=5|Isoform 2 of Carnitine O-acetyltransferase OS=Homo sapiens OX=9606 GN=CRAT	83741.0|80845.3	23	7.85855	0.193617	-0.0246068	1.37577	0.199365	0.999039	-4.52356	CA	no_hit
REPS1	H0YDT0|Q96D71|Q96D71-2|Q96D71-3|Q96D71-4	RalBP1-associated Eps domain-containing protein 1 (Fragment) OS=Homo sapiens OX=9606 GN=REPS1 PE=1 SV=1|RalBP1-associated Eps domain-containing protein 1 OS=Homo sapiens OX=9606 GN=REPS1 PE=1 SV=3|Isoform 2 of RalBP1-associated Eps domain-containing protein 1 OS=Homo sapiens OX=9606 GN=REPS1|Isoform 3 of RalBP1-associated Eps domain-containing protein 1 OS=Homo sapiens OX=9606 GN=REPS1|Isoform 4 …	93325.9|98340.2|88521.7|98269.2|95329.8	8	6.96579	-0.28273	-0.178537	-1.37576	0.199369	0.999039	-4.52357	CA	no_hit
TRNT1	Q96Q11|Q96Q11-2	CCA tRNA nucleotidyltransferase 1, mitochondrial OS=Homo sapiens OX=9606 GN=TRNT1 PE=1 SV=2|Isoform 2 of CCA tRNA nucleotidyltransferase 1, mitochondrial OS=Homo sapiens OX=9606 GN=TRNT1	61579.9|59282.7	16	7.77498	0.224254	0.113668	1.37423	0.199828	0.999039	-4.52394	CA	no_hit
ANKFY1	Q9P2R3|Q9P2R3-2|Q9P2R3-4	Rabankyrin-5 OS=Homo sapiens OX=9606 GN=ANKFY1 PE=1 SV=2|Isoform 2 of Rabankyrin-5 OS=Homo sapiens OX=9606 GN=ANKFY1|Isoform 4 of Rabankyrin-5 OS=Homo sapiens OX=9606 GN=ANKFY1	145733.0|145821.0|150685.0	27	7.81902	0.222167	0.0800813	1.37407	0.199875	0.999039	-4.52397	CA	no_hit
DDHD1	Q8NEL9|Q8NEL9-2|Q8NEL9-4|A0A087X0H7	Phospholipase DDHD1 OS=Homo sapiens OX=9606 GN=DDHD1 PE=1 SV=2|Isoform 2 of Phospholipase DDHD1 OS=Homo sapiens OX=9606 GN=DDHD1|Isoform 4 of Phospholipase DDHD1 OS=Homo sapiens OX=9606 GN=DDHD1|Phospholipase DDHD1 OS=Homo sapiens OX=9606 GN=DDHD1 PE=1 SV=1|Phospholipase DDHD1 OS=Homo sapiens OX=9606 GN=DDHD1 PE=1 SV=2|Isoform 2 of Phospholipase DDHD1 OS=Homo sapiens OX=9606 GN=DDHD1|Isoform 4 of…	112673.0|108987.0|109665.0|96855.5	4	6.5925	0.229109	0.119356	1.37338	0.200084	0.999039	-4.52414	CA	no_hit
PDLIM5	Q96HC4	PDZ and LIM domain protein 5 OS=Homo sapiens OX=9606 GN=PDLIM5 PE=1 SV=5	75749.2	22	8.36851	-0.230369	0.172358	-1.37303	0.200188	0.999039	-4.52423	CA	no_hit
HNRNPA0	Q13151	Heterogeneous nuclear ribonucleoprotein A0 OS=Homo sapiens OX=9606 GN=HNRNPA0 PE=1 SV=1	36468.6	8	8.21946	0.338456	-2.44024	1.37101	0.200796	0.999039	-4.52472	CA	no_hit
LRRFIP1	Q32MZ4-3|Q32MZ4-4	Isoform 3 of Leucine-rich repeat flightless-interacting protein 1 OS=Homo sapiens OX=9606 GN=LRRFIP1|Isoform 4 of Leucine-rich repeat flightless-interacting protein 1 OS=Homo sapiens OX=9606 GN=LRRFIP1|Isoform 3 of Leucine-rich repeat flightless-interacting protein 1 OS=Homo sapiens OX=9606 GN=LRRFIP1	102127.0|89557.1	24	7.794	-0.291955	0.130626	-1.37089	0.200833	0.999039	-4.52475	CA	no_hit
ITFG1	F5GXC5|H3BUJ1|Q8TB96	T-cell immunomodulatory protein OS=Homo sapiens OX=9606 GN=ITFG1 PE=1 SV=1|T-cell immunomodulatory protein (Fragment) OS=Homo sapiens OX=9606 GN=ITFG1 PE=1 SV=2|T-cell immunomodulatory protein OS=Homo sapiens OX=9606 GN=ITFG1 PE=1 SV=1|T-cell immunomodulatory protein OS=Homo sapiens OX=9606 GN=ITFG1 PE=1 SV=1	58613.2|23839.0|76981.4	5	6.68508	-0.348351	0.466016	-1.37067	0.200898	0.999039	-4.5248	CA	no_hit
MRPS6	P82932	28S ribosomal protein S6, mitochondrial OS=Homo sapiens OX=9606 GN=MRPS6 PE=1 SV=3	17012.5	6	7.60461	0.268523	-0.577545	1.37051	0.200948	0.999039	-4.52484	CA	no_hit
RSL1D1	I3L1A3|O76021	Ribosomal L1 domain-containing protein 1 (Fragment) OS=Homo sapiens OX=9606 GN=RSL1D1 PE=1 SV=1|Ribosomal L1 domain-containing protein 1 OS=Homo sapiens OX=9606 GN=RSL1D1 PE=1 SV=3|Ribosomal L1 domain-containing protein 1 OS=Homo sapiens OX=9606 GN=RSL1D1 PE=1 SV=3	12389.8|78895.2	21	8.53739	0.637233	-4.6787	1.37036	0.200994	0.999039	-4.52488	CA	no_hit
ISY1	Q9ULR0|Q9ULR0-1|Q9ULR0-2	Pre-mRNA-splicing factor ISY1 homolog OS=Homo sapiens OX=9606 GN=ISY1 PE=1 SV=3|Isoform 2 of Pre-mRNA-splicing factor ISY1 homolog OS=Homo sapiens OX=9606 GN=ISY1|Isoform 1 of Pre-mRNA-splicing factor ISY1 homolog OS=Homo sapiens OX=9606 GN=ISY1	41546.7|46289.1|43996.0	5	7.12181	-0.329766	-0.10434	-1.36969	0.201196	0.999039	-4.52504	CA	no_hit
ABHD6	Q9BV23	Monoacylglycerol lipase ABHD6 OS=Homo sapiens OX=9606 GN=ABHD6 PE=1 SV=1	45150.2	4	6.93523	0.310371	0.0274325	1.36939	0.201285	0.999039	-4.52511	CA	no_hit
DMTN	Q08495|Q08495-2|Q08495-3|Q08495-4	Dematin OS=Homo sapiens OX=9606 GN=DMTN PE=1 SV=3|Isoform 2 of Dematin OS=Homo sapiens OX=9606 GN=DMTN|Isoform 3 of Dematin OS=Homo sapiens OX=9606 GN=DMTN|Isoform 4 of Dematin OS=Homo sapiens OX=9606 GN=DMTN	54422.3|51635.9|49229.7|50164.1	3	6.83185	-0.476918	0.715734	-1.36911	0.20137	0.999039	-4.52518	CA	no_hit
NDUFAF6	H0YB46|H0YBQ9|H0YBT9|H0YC61|H7C250|Q330K2|Q330K2-2|Q330K2-3	NADH dehydrogenase (ubiquinone) complex I, assembly factor 6 (Fragment) OS=Homo sapiens OX=9606 GN=NDUFAF6 PE=1 SV=1|NADH dehydrogenase (ubiquinone) complex I, assembly factor 6 (Fragment) OS=Homo sapiens OX=9606 GN=NDUFAF6 PE=1 SV=1|NADH dehydrogenase (ubiquinone) complex I, assembly factor 6 (Fragment) OS=Homo sapiens OX=9606 GN=NDUFAF6 PE=1 SV=1|NADH dehydrogenase (ubiquinone) complex I, assem…	10640.5|10992.7|17964.3|12323.3|9492.8|45547.9|40051.1|14181.2	5	6.47339	0.190998	-0.00547629	1.36788	0.201741	0.999039	-4.52548	CA	no_hit
INPP4A	Q96PE3|Q96PE3-2|Q96PE3-3|Q96PE3-4	Inositol polyphosphate-4-phosphatase type I A OS=Homo sapiens OX=9606 GN=INPP4A PE=1 SV=1|Isoform 2 of Inositol polyphosphate-4-phosphatase type I A OS=Homo sapiens OX=9606 GN=INPP4A|Isoform 3 of Inositol polyphosphate-4-phosphatase type I A OS=Homo sapiens OX=9606 GN=INPP4A|Isoform 4 of Inositol polyphosphate-4-phosphatase type I A OS=Homo sapiens OX=9606 GN=INPP4A	125837.0|121412.0|125112.0|122458.0	3	6.3888	0.277238	-0.0974803	1.36707	0.20199	0.999039	-4.52567	CA	no_hit
MYO6	A0A1Y0BRN3|Q5JVM0	Myosin VI transcript variant 007 OS=Homo sapiens OX=9606 GN=MYO6 PE=1 SV=1|Myosin VI transcript variant 007 OS=Homo sapiens OX=9606 GN=MYO6 PE=1 SV=1|Unconventional myosin-VI (Fragment) OS=Homo sapiens OX=9606 GN=MYO6 PE=1 SV=1	186992.0|26178.3	35	7.65012	0.307437	-0.233052	1.36679	0.202074	0.999039	-4.52574	CA	no_hit
FUBP3	Q96I24	Far upstream element-binding protein 3 OS=Homo sapiens OX=9606 GN=FUBP3 PE=1 SV=2	69245.3	23	8.02928	-0.199238	-0.0939939	-1.36497	0.202627	0.999039	-4.52618	CA	no_hit
PRPS1	P60891	Ribose-phosphate pyrophosphokinase 1 OS=Homo sapiens OX=9606 GN=PRPS1 PE=1 SV=2	41409.3	9	8.20759	0.20786	0.0586853	1.36426	0.202841	0.999039	-4.52635	CA	no_hit
ACTR8	Q9H981	Actin-related protein 8 OS=Homo sapiens OX=9606 GN=ACTR8 PE=1 SV=2	83158	4	6.79749	0.236636	-0.829169	1.36392	0.202945	0.999039	-4.52644	CA	no_hit
CROT	Q9UKG9|Q9UKG9-3	Peroxisomal carnitine O-octanoyltransferase OS=Homo sapiens OX=9606 GN=CROT PE=1 SV=2|Isoform 3 of Peroxisomal carnitine O-octanoyltransferase OS=Homo sapiens OX=9606 GN=CROT	82795.7|86359.6	12	7.15041	0.216896	0.163849	1.36388	0.202957	0.999039	-4.52644	CA	no_hit
TNKS1BP1	Q9C0C2	182 kDa tankyrase-1-binding protein OS=Homo sapiens OX=9606 GN=TNKS1BP1 PE=1 SV=4	200964	51	7.72176	-0.300622	-0.295084	-1.36368	0.203018	0.999039	-4.52649	CA	no_hit
RAB12	A0A3B3ITT1|Q6IQ22	Ras-related protein Rab-12 OS=Homo sapiens OX=9606 GN=RAB12 PE=1 SV=1|Ras-related protein Rab-12 OS=Homo sapiens OX=9606 GN=RAB12 PE=1 SV=3	42832.8|33657.4	9	7.22576	0.155442	0.206629	1.36348	0.203077	0.999039	-4.52654	CA	no_hit
MYCBP2	A0A499FJI4|O75592|O75592-2	E3 ubiquitin-protein ligase MYCBP2 OS=Homo sapiens OX=9606 GN=MYCBP2 PE=1 SV=1|E3 ubiquitin-protein ligase MYCBP2 OS=Homo sapiens OX=9606 GN=MYCBP2 PE=1 SV=4|Isoform 2 of E3 ubiquitin-protein ligase MYCBP2 OS=Homo sapiens OX=9606 GN=MYCBP2	610031.0|613638.0|613261.0	9	6.97682	0.31211	-0.705106	1.3633	0.203133	0.999039	-4.52658	CA	no_hit
SNAP25	P60880-2	Isoform 2 of Synaptosomal-associated protein 25 OS=Homo sapiens OX=9606 GN=SNAP25	27199.8	4	6.58614	0.187007	0.135027	1.36301	0.203221	0.999039	-4.52665	CA	no_hit
VPS53	Q5VIR6-4	Isoform 4 of Vacuolar protein sorting-associated protein 53 homolog OS=Homo sapiens OX=9606 GN=VPS53	115278	11	7.35057	0.226668	-0.0602802	1.36295	0.203241	0.999039	-4.52667	CA	no_hit
LRCH4	O75427	Leucine-rich repeat and calponin homology domain-containing protein 4 OS=Homo sapiens OX=9606 GN=LRCH4 PE=1 SV=2	79260.8	5	6.70015	-0.192613	0.385114	-1.36289	0.203259	0.999039	-4.52668	CA	no_hit
TMEM106B	Q9NUM4	Transmembrane protein 106B OS=Homo sapiens OX=9606 GN=TMEM106B PE=1 SV=2	34434.8	7	7.45678	-0.2392	0.321461	-1.36262	0.203342	0.999039	-4.52675	CA	no_hit
DNM1L	O00429|O00429-3|O00429-2|O00429-4	Dynamin-1-like protein OS=Homo sapiens OX=9606 GN=DNM1L PE=1 SV=2|Isoform 2 of Dynamin-1-like protein OS=Homo sapiens OX=9606 GN=DNM1L|Isoform 4 of Dynamin-1-like protein OS=Homo sapiens OX=9606 GN=DNM1L|Isoform 3 of Dynamin-1-like protein OS=Homo sapiens OX=9606 GN=DNM1L	96028.6|92986.0|94383.7|91341.1	32	8.1148	0.203686	0.189515	1.36231	0.203435	0.999039	-4.52682	CA	no_hit
MAPRE1	Q15691	Microtubule-associated protein RP/EB family member 1 OS=Homo sapiens OX=9606 GN=MAPRE1 PE=1 SV=3	36843.8	8	8.50802	-0.428721	0.639651	-1.36199	0.203534	0.999039	-4.5269	CA	no_hit
CNOT7	Q9UIV1	CCR4-NOT transcription complex subunit 7 OS=Homo sapiens OX=9606 GN=CNOT7 PE=1 SV=3	37933.4	3	6.75002	-0.324985	-0.0921273	-1.36149	0.203685	0.999039	-4.52702	CA	no_hit
ARF5	P84085	ADP-ribosylation factor 5 OS=Homo sapiens OX=9606 GN=ARF5 PE=1 SV=2	23976.9	5	7.88988	0.271878	0.0630757	1.36065	0.203941	0.999039	-4.52723	CA	no_hit
GMPR2	A0A087WWM4|H0YNJ6|Q9P2T1|Q9P2T1-3|F8WAN9|H0YMB3	GMP reductase OS=Homo sapiens OX=9606 GN=GMPR2 PE=1 SV=1|GMP reductase OS=Homo sapiens OX=9606 GN=GMPR2 PE=1 SV=1|GMP reductase 2 OS=Homo sapiens OX=9606 GN=GMPR2 PE=1 SV=1|Isoform 3 of GMP reductase 2 OS=Homo sapiens OX=9606 GN=GMPR2|GMP reductase OS=Homo sapiens OX=9606 GN=GMPR2 PE=1 SV=1|GMP reductase OS=Homo sapiens OX=9606 GN=GMPR2 PE=1 SV=1|GMP reductase OS=Homo sapiens OX=9606 GN=GMPR2 PE=…	46614.9|55691.6|45968.4|42331.6|46362.7|41048.7	12	7.89543	0.219805	0.386885	1.36042	0.204012	0.999039	-4.52728	CA	no_hit
HSP90B1	P14625	Endoplasmin OS=Homo sapiens OX=9606 GN=HSP90B1 PE=1 SV=1	116425	49	9.33138	0.184891	0.306796	1.35957	0.204272	0.999039	-4.52749	CA	no_hit
MRPL47	Q9HD33|Q9HD33-2	39S ribosomal protein L47, mitochondrial OS=Homo sapiens OX=9606 GN=MRPL47 PE=1 SV=2|Isoform 2 of 39S ribosomal protein L47, mitochondrial OS=Homo sapiens OX=9606 GN=MRPL47	37208.2|34540.7	5	7.62486	0.421074	-1.12275	1.35876	0.20452	0.999039	-4.52768	CA	no_hit
BCAR1	P56945|P56945-3|A0A2R8Y4C2|A0A2R8Y596|A0A2R8Y5C9|A0A2R8Y6M6|A0A2R8Y8C4|A0A2R8YFK2|A0A2R8YFS8|P56945-2|P56945-5|P56945-6|P56945-7|P56945-8	Breast cancer anti-estrogen resistance protein 1 OS=Homo sapiens OX=9606 GN=BCAR1 PE=1 SV=2|Isoform 3 of Breast cancer anti-estrogen resistance protein 1 OS=Homo sapiens OX=9606 GN=BCAR1|Breast cancer anti-estrogen resistance protein 1 OS=Homo sapiens OX=9606 GN=BCAR1 PE=1 SV=1|Breast cancer anti-estrogen resistance protein 1 OS=Homo sapiens OX=9606 GN=BCAR1 PE=1 SV=1|Breast cancer anti-estrogen …	103885.0|106328.0|103916.0|109140.0|106177.0|103834.0|106358.0|103680.0|106012.0|105982.0|103650.0|109110.0|106147.0|103804.0	15	7.253	-0.29313	0.370321	-1.35764	0.204862	0.999039	-4.52795	CA	no_hit
SEC22B	O75396	Vesicle-trafficking protein SEC22b OS=Homo sapiens OX=9606 GN=SEC22B PE=1 SV=4	28760.3	10	8.26736	0.17135	0.250138	1.35748	0.204914	0.999039	-4.52799	CA	no_hit
GATAD2B	A0A0U1RRM1|Q8WXI9	Transcriptional repressor p66-beta OS=Homo sapiens OX=9606 GN=GATAD2B PE=1 SV=1|Transcriptional repressor p66-beta OS=Homo sapiens OX=9606 GN=GATAD2B PE=1 SV=1	74715.7|76513.6	4	6.80942	-0.524486	-0.090744	-1.3574	0.204938	0.999039	-4.52801	CA	no_hit
DR1	Q01658	Protein Dr1 OS=Homo sapiens OX=9606 GN=DR1 PE=1 SV=1	22701.8	2	7.03168	-0.769163	0.911658	-1.35706	0.205042	0.999039	-4.52809	CA	no_hit
RAD51C	O43502	DNA repair protein RAD51 homolog 3 OS=Homo sapiens OX=9606 GN=RAD51C PE=1 SV=1	48817.2	5	6.8925	0.182341	0.200707	1.35602	0.205361	0.999039	-4.52834	CA	no_hit
PAFAH2	Q99487	Platelet-activating factor acetylhydrolase 2, cytoplasmic OS=Homo sapiens OX=9606 GN=PAFAH2 PE=1 SV=1	49444.5	6	6.83326	0.214812	0.0817123	1.35597	0.205376	0.999039	-4.52836	CA	no_hit
NSUN4	Q96CB9	5-methylcytosine rRNA methyltransferase NSUN4 OS=Homo sapiens OX=9606 GN=NSUN4 PE=1 SV=2	48498.6	8	7.23927	-0.197488	-0.783684	-1.35588	0.205404	0.999039	-4.52838	CA	no_hit
RAB6A	P20340|P20340-2	Ras-related protein Rab-6A OS=Homo sapiens OX=9606 GN=RAB6A PE=1 SV=3|Isoform 2 of Ras-related protein Rab-6A OS=Homo sapiens OX=9606 GN=RAB6A|Ras-related protein Rab-6A OS=Homo sapiens OX=9606 GN=RAB6A PE=1 SV=3	27646.7|27602.6	10	8.00489	0.210546	0.120478	1.35558	0.205497	0.999039	-4.52845	CA	no_hit
LDAH	B5MDU6|Q9H6V9|Q9H6V9-2	Lipid droplet-associated hydrolase OS=Homo sapiens OX=9606 GN=LDAH PE=1 SV=1|Lipid droplet-associated hydrolase OS=Homo sapiens OX=9606 GN=LDAH PE=1 SV=1|Isoform 2 of Lipid droplet-associated hydrolase OS=Homo sapiens OX=9606 GN=LDAH	51063.4|45051.3|46025.9	5	7.36918	0.200551	0.241022	1.35554	0.20551	0.999039	-4.52846	CA	no_hit
GCC2	Q8IWJ2|U3KPU4	GRIP and coiled-coil domain-containing protein 2 OS=Homo sapiens OX=9606 GN=GCC2 PE=1 SV=4|GRIP and coiled-coil domain-containing protein 2 OS=Homo sapiens OX=9606 GN=GCC2 PE=1 SV=4|GRIP and coiled-coil domain-containing protein 2 (Fragment) OS=Homo sapiens OX=9606 GN=GCC2 PE=1 SV=1	254976.0|23606.7	38	7.42057	0.190491	0.17451	1.35531	0.205579	0.999039	-4.52852	CA	no_hit
ABR	B7Z683|Q12979-2	Active breakpoint cluster region-related protein OS=Homo sapiens OX=9606 GN=ABR PE=1 SV=1|Isoform Short of Active breakpoint cluster region-related protein OS=Homo sapiens OX=9606 GN=ABR	90828.9|116482.0	21	7.56848	0.256224	0.0733561	1.35527	0.205591	0.999039	-4.52853	CA	no_hit
WDR46	O15213	WD repeat-containing protein 46 OS=Homo sapiens OX=9606 GN=WDR46 PE=1 SV=3	83391.1	14	7.57164	-0.292032	-3.39288	-1.35454	0.205818	0.999039	-4.5287	CA	no_hit
USP11	G5E9A6|P51784	Ubiquitin carboxyl-terminal hydrolase OS=Homo sapiens OX=9606 GN=USP11 PE=1 SV=1|Ubiquitin carboxyl-terminal hydrolase OS=Homo sapiens OX=9606 GN=USP11 PE=1 SV=1|Ubiquitin carboxyl-terminal hydrolase 11 OS=Homo sapiens OX=9606 GN=USP11 PE=1 SV=3	119681.0|124634.0	13	7.33753	-0.174674	0.148983	-1.35441	0.205855	0.999039	-4.52873	CA	no_hit
PELP1	C9JFV4|Q8IZL8	Proline-, glutamic acid- and leucine-rich protein 1 OS=Homo sapiens OX=9606 GN=PELP1 PE=1 SV=2|Proline-, glutamic acid- and leucine-rich protein 1 OS=Homo sapiens OX=9606 GN=PELP1 PE=1 SV=2	132565.0|126963.0	11	7.75584	0.326449	-3.13758	1.35387	0.206023	0.999039	-4.52886	CA	no_hit
PSMA6	G3V5Z7|P60900	Proteasome subunit alpha type OS=Homo sapiens OX=9606 GN=PSMA6 PE=1 SV=1|Proteasome subunit alpha type-6 OS=Homo sapiens OX=9606 GN=PSMA6 PE=1 SV=1	34308.3|33617.9	16	8.62789	0.272386	0.518336	1.35197	0.20661	0.999039	-4.52932	CA	no_hit
HMGA1	P17096	High mobility group protein HMG-I/HMG-Y OS=Homo sapiens OX=9606 GN=HMGA1 PE=1 SV=3	16536.5	5	8.22378	-0.513689	-2.11929	-1.35173	0.206683	0.999039	-4.52938	CA	no_hit
POLE4	Q9NR33	DNA polymerase epsilon subunit 4 OS=Homo sapiens OX=9606 GN=POLE4 PE=1 SV=2	13836.4	3	6.67401	-0.682606	1.17118	-1.35093	0.206931	0.999039	-4.52957	CA	no_hit
ACTR1B	P42025	Beta-centractin OS=Homo sapiens OX=9606 GN=ACTR1B PE=1 SV=1	49377.5	6	6.96797	0.165856	0.116673	1.3501	0.207187	0.999039	-4.52977	CA	no_hit
OSBP	P22059	Oxysterol-binding protein 1 OS=Homo sapiens OX=9606 GN=OSBP PE=1 SV=1	107560	22	7.87582	0.208548	0.299876	1.34984	0.207269	0.999039	-4.52984	CA	no_hit
BCAT1	P54687|P54687-4|P54687-5	Branched-chain-amino-acid aminotransferase, cytosolic OS=Homo sapiens OX=9606 GN=BCAT1 PE=1 SV=3|Isoform 4 of Branched-chain-amino-acid aminotransferase, cytosolic OS=Homo sapiens OX=9606 GN=BCAT1|Branched-chain-amino-acid aminotransferase, cytosolic OS=Homo sapiens OX=9606 GN=BCAT1 PE=1 SV=3|Isoform 4 of Branched-chain-amino-acid aminotransferase, cytosolic OS=Homo sapiens OX=9606 GN=BCAT1|Isofo…	50201.3|49769.0|51061.7	6	6.9543	0.24881	0.39332	1.34962	0.207338	0.999039	-4.52989	CA	no_hit
KANK2	Q63ZY3|Q63ZY3-2|Q63ZY3-3	KN motif and ankyrin repeat domain-containing protein 2 OS=Homo sapiens OX=9606 GN=KANK2 PE=1 SV=1|Isoform 2 of KN motif and ankyrin repeat domain-containing protein 2 OS=Homo sapiens OX=9606 GN=KANK2|Isoform 3 of KN motif and ankyrin repeat domain-containing protein 2 OS=Homo sapiens OX=9606 GN=KANK2	100130.0|100876.0|99000.4	9	7.41627	-0.250543	-0.634681	-1.34954	0.207362	0.999039	-4.52991	CA	no_hit
STXBP3	O00186	Syntaxin-binding protein 3 OS=Homo sapiens OX=9606 GN=STXBP3 PE=1 SV=2	88710.9	17	7.72487	0.262257	0.000103641	1.3486	0.207652	0.999039	-4.53013	CA	no_hit
TOMM5	F8W8Z9|Q8N4H5|Q8N4H5-2|Q8N4H5-3	Mitochondrial import receptor subunit TOM5 homolog OS=Homo sapiens OX=9606 GN=TOMM5 PE=1 SV=1|Mitochondrial import receptor subunit TOM5 homolog OS=Homo sapiens OX=9606 GN=TOMM5 PE=1 SV=1|Isoform 2 of Mitochondrial import receptor subunit TOM5 homolog OS=Homo sapiens OX=9606 GN=TOMM5|Isoform 3 of Mitochondrial import receptor subunit TOM5 homolog OS=Homo sapiens OX=9606 GN=TOMM5	12660.7|7552.41|11528.0|11341.2	4	8.2541	0.205512	0.40162	1.34817	0.207785	0.999039	-4.53024	CA	no_hit
HMGN1	A6NEL0|A6NL93|P05114	Non-histone chromosomal protein HMG-14 OS=Homo sapiens OX=9606 GN=HMGN1 PE=1 SV=1|Non-histone chromosomal protein HMG-14 OS=Homo sapiens OX=9606 GN=HMGN1 PE=1 SV=1|Non-histone chromosomal protein HMG-14 OS=Homo sapiens OX=9606 GN=HMGN1 PE=1 SV=3	18207.3|15614.1|17040.9	3	7.18555	-1.05351	0.79436	-1.34803	0.207829	0.999039	-4.53027	CA	no_hit
SMG7	E9PD50|Q92540|Q92540-2|Q92540-4|Q92540-5	Protein SMG7 OS=Homo sapiens OX=9606 GN=SMG7 PE=1 SV=1|Protein SMG7 OS=Homo sapiens OX=9606 GN=SMG7 PE=1 SV=2|Isoform 2 of Protein SMG7 OS=Homo sapiens OX=9606 GN=SMG7|Isoform 4 of Protein SMG7 OS=Homo sapiens OX=9606 GN=SMG7|Isoform 5 of Protein SMG7 OS=Homo sapiens OX=9606 GN=SMG7	150873.0|148877.0|140519.0|153356.0|149145.0	7	6.61606	-0.227399	-0.0575666	-1.34785	0.207884	0.999039	-4.53031	CA	no_hit
MED8	Q96G25-2|Q96G25	Isoform 2 of Mediator of RNA polymerase II transcription subunit 8 OS=Homo sapiens OX=9606 GN=MED8|Mediator of RNA polymerase II transcription subunit 8 OS=Homo sapiens OX=9606 GN=MED8 PE=1 SV=2|Isoform 2 of Mediator of RNA polymerase II transcription subunit 8 OS=Homo sapiens OX=9606 GN=MED8	39661.7|34347.4	2	6.51092	-0.508855	-0.175589	-1.34779	0.207904	0.999039	-4.53033	CA	no_hit
PPP6R3	E9PKF6|H7BXH2|Q5H9R7|Q5H9R7-2|Q5H9R7-5|Q5H9R7-6	Serine/threonine-protein phosphatase 6 regulatory subunit 3 OS=Homo sapiens OX=9606 GN=PPP6R3 PE=1 SV=1|Serine/threonine-protein phosphatase 6 regulatory subunit 3 OS=Homo sapiens OX=9606 GN=PPP6R3 PE=1 SV=1|Serine/threonine-protein phosphatase 6 regulatory subunit 3 OS=Homo sapiens OX=9606 GN=PPP6R3 PE=1 SV=2|Isoform 2 of Serine/threonine-protein phosphatase 6 regulatory subunit 3 OS=Homo sapien…	107971.0|106648.0|112266.0|111555.0|113386.0|108683.0	21	7.84566	0.240387	-0.157031	1.34599	0.208465	0.999039	-4.53076	CA	no_hit
PTPN2	P17706|P17706-2|P17706-4|P17706-3	Tyrosine-protein phosphatase non-receptor type 2 OS=Homo sapiens OX=9606 GN=PTPN2 PE=1 SV=2|Isoform 2 of Tyrosine-protein phosphatase non-receptor type 2 OS=Homo sapiens OX=9606 GN=PTPN2|Isoform 4 of Tyrosine-protein phosphatase non-receptor type 2 OS=Homo sapiens OX=9606 GN=PTPN2|Tyrosine-protein phosphatase non-receptor type 2 OS=Homo sapiens OX=9606 GN=PTPN2 PE=1 SV=2|Isoform 2 of Tyrosine-pro…	57663.5|54056.6|57815.9|48056.0	11	7.27128	0.182712	0.170883	1.34481	0.208832	0.999039	-4.53105	CA	no_hit
ENY2	Q9NPA8|Q9NPA8-2	Transcription and mRNA export factor ENY2 OS=Homo sapiens OX=9606 GN=ENY2 PE=1 SV=1|Isoform 2 of Transcription and mRNA export factor ENY2 OS=Homo sapiens OX=9606 GN=ENY2	15590.0|14741.5	4	7.30485	-0.405348	0.458489	-1.34478	0.208841	0.999039	-4.53105	CA	no_hit
FBXL18	Q96ME1-4	Isoform 4 of F-box/LRR-repeat protein 18 OS=Homo sapiens OX=9606 GN=FBXL18	87291.1	10	7.32538	0.193141	-0.0789966	1.34408	0.209061	0.999039	-4.53122	CA	no_hit
PFKL	P17858	ATP-dependent 6-phosphofructokinase, liver type OS=Homo sapiens OX=9606 GN=PFKL PE=1 SV=6	97018.1	13	7.49174	0.21236	0.137391	1.34292	0.209421	0.999039	-4.5315	CA	no_hit
CREBBP	Q92793|Q92793-2	CREB-binding protein OS=Homo sapiens OX=9606 GN=CREBBP PE=1 SV=3|CREB-binding protein OS=Homo sapiens OX=9606 GN=CREBBP PE=1 SV=3|Isoform 2 of CREB-binding protein OS=Homo sapiens OX=9606 GN=CREBBP	303321.0|297825.0	6	6.38911	-0.43116	-0.823813	-1.34266	0.209504	0.999039	-4.53156	CA	no_hit
ANP32B	Q92688|Q92688-2	Acidic leucine-rich nuclear phosphoprotein 32 family member B OS=Homo sapiens OX=9606 GN=ANP32B PE=1 SV=1|Isoform 2 of Acidic leucine-rich nuclear phosphoprotein 32 family member B OS=Homo sapiens OX=9606 GN=ANP32B	34112.9|26692.9	5	8.57667	-0.360961	-0.328882	-1.34201	0.209705	0.999039	-4.53172	CA	no_hit
ROBO1	A0A087WTM1|A0A087WZ85|A0A0A0MSX4|Q9Y6N7|Q9Y6N7-2|Q9Y6N7-3|Q9Y6N7-4|Q9Y6N7-5|Q9Y6N7-6	Roundabout homolog 1 OS=Homo sapiens OX=9606 GN=ROBO1 PE=1 SV=1|Roundabout homolog 1 OS=Homo sapiens OX=9606 GN=ROBO1 PE=1 SV=1|Roundabout homolog 1 OS=Homo sapiens OX=9606 GN=ROBO1 PE=1 SV=1|Roundabout homolog 1 OS=Homo sapiens OX=9606 GN=ROBO1 PE=1 SV=1|Isoform 2 of Roundabout homolog 1 OS=Homo sapiens OX=9606 GN=ROBO1|Isoform 3 of Roundabout homolog 1 OS=Homo sapiens OX=9606 GN=ROBO1|Isoform 4…	198592.0|188093.0|188827.0|204165.0|204868.0|199558.0|199315.0|198580.0|191135.0	4	6.5789	-0.186178	0.100128	-1.34137	0.209906	0.999039	-4.53187	CA	no_hit
MRPL21	Q7Z2W9	39S ribosomal protein L21, mitochondrial OS=Homo sapiens OX=9606 GN=MRPL21 PE=1 SV=2	26926.1	5	7.77803	0.316032	-0.360588	1.34109	0.209995	0.999039	-4.53194	CA	no_hit
SLMAP	A0A590UJK3|Q14BN4|Q14BN4-2|Q14BN4-3	Sarcolemmal membrane-associated protein OS=Homo sapiens OX=9606 GN=SLMAP PE=1 SV=1|Sarcolemmal membrane-associated protein OS=Homo sapiens OX=9606 GN=SLMAP PE=1 SV=1|Sarcolemmal membrane-associated protein OS=Homo sapiens OX=9606 GN=SLMAP PE=1 SV=1|Sarcolemmal membrane-associated protein OS=Homo sapiens OX=9606 GN=SLMAP PE=1 SV=1|Isoform 2 of Sarcolemmal membrane-associated protein OS=Homo sapien…	119961.0|117898.0|112144.0|115238.0	15	7.13968	0.229546	0.0475094	1.34088	0.210061	0.999039	-4.53199	CA	no_hit
MAPRE3	Q9UPY8-2	Isoform 2 of Microtubule-associated protein RP/EB family member 3 OS=Homo sapiens OX=9606 GN=MAPRE3	36426.1	4	6.84779	-0.302519	0.69971	-1.34049	0.210182	0.999039	-4.53208	CA	no_hit
CASC3	J3KSY7|O15234	Protein CASC3 (Fragment) OS=Homo sapiens OX=9606 GN=CASC3 PE=1 SV=1|Protein CASC3 OS=Homo sapiens OX=9606 GN=CASC3 PE=1 SV=2	32192.5|86080.2	3	6.89606	-0.367101	-0.842396	-1.33915	0.210602	0.999039	-4.53241	CA	no_hit
PIP	P12273	Prolactin-inducible protein OS=Homo sapiens OX=9606 GN=PIP PE=1 SV=1	19889	5	6.9541	1.79894	0.1782	1.33649	0.21144	0.999039	-4.53304	CA	no_hit
POP7	C9JYM0|O75817	Ribonuclease P protein subunit p20 (Fragment) OS=Homo sapiens OX=9606 GN=POP7 PE=1 SV=1|Ribonuclease P protein subunit p20 OS=Homo sapiens OX=9606 GN=POP7 PE=1 SV=2	16645.9|17276.3	3	6.83615	-0.177103	-0.740353	-1.33542	0.211777	0.999039	-4.5333	CA	no_hit
TBXAS1	A0A0C4DH47|P24557|P24557-2|P24557-3|Q53F23	Thromboxane-A synthase OS=Homo sapiens OX=9606 GN=TBXAS1 PE=1 SV=1|Thromboxane-A synthase OS=Homo sapiens OX=9606 GN=TBXAS1 PE=1 SV=3|Isoform 2 of Thromboxane-A synthase OS=Homo sapiens OX=9606 GN=TBXAS1|Isoform 3 of Thromboxane-A synthase OS=Homo sapiens OX=9606 GN=TBXAS1|HCG14925, isoform CRA_a (Fragment) OS=Homo sapiens OX=9606 GN=TBXAS1 PE=1 SV=1	74067.4|68160.1|59425.3|73936.3|68291.2	13	7.2813	0.153587	0.152433	1.33493	0.21193	0.999039	-4.53342	CA	no_hit
TBC1D4	O60343|O60343-2|O60343-3	TBC1 domain family member 4 OS=Homo sapiens OX=9606 GN=TBC1D4 PE=1 SV=2|Isoform 2 of TBC1 domain family member 4 OS=Homo sapiens OX=9606 GN=TBC1D4|Isoform 3 of TBC1 domain family member 4 OS=Homo sapiens OX=9606 GN=TBC1D4	172100.0|164488.0|171226.0	15	7.02616	0.202007	0.0372126	1.33275	0.21262	0.999039	-4.53394	CA	no_hit
SYTL5	Q8TDW5|Q8TDW5-2	Synaptotagmin-like protein 5 OS=Homo sapiens OX=9606 GN=SYTL5 PE=1 SV=1|Isoform 2 of Synaptotagmin-like protein 5 OS=Homo sapiens OX=9606 GN=SYTL5	100409.0|103107.0	3	6.39119	0.196038	-0.0283204	1.33236	0.212742	0.999039	-4.53403	CA	no_hit
HPRT1	P00492	Hypoxanthine-guanine phosphoribosyltransferase OS=Homo sapiens OX=9606 GN=HPRT1 PE=1 SV=2	29659	9	8.26486	0.212508	0.444785	1.33202	0.212849	0.999039	-4.53411	CA	no_hit
GATAD2A	Q86YP4|Q86YP4-2|Q86YP4-3	Transcriptional repressor p66-alpha OS=Homo sapiens OX=9606 GN=GATAD2A PE=1 SV=1|Isoform 2 of Transcriptional repressor p66-alpha OS=Homo sapiens OX=9606 GN=GATAD2A|Isoform 3 of Transcriptional repressor p66-alpha OS=Homo sapiens OX=9606 GN=GATAD2A	79922.5|76478.6|79993.6	4	6.61025	-0.272515	-0.67728	-1.33178	0.212926	0.999039	-4.53417	CA	no_hit
PANK4	A0A494C169|Q9NVE7	4'-phosphopantetheine phosphatase OS=Homo sapiens OX=9606 GN=PANK4 PE=1 SV=1|4'-phosphopantetheine phosphatase OS=Homo sapiens OX=9606 GN=PANK4 PE=1 SV=1	100941.0|99702.2	15	6.98707	0.207756	0.0233978	1.33002	0.213485	0.999039	-4.53459	CA	no_hit
EXOC8	Q8IYI6	Exocyst complex component 8 OS=Homo sapiens OX=9606 GN=EXOC8 PE=1 SV=2	93991.6	15	7.55358	0.2129	0.0342796	1.3294	0.213682	0.999039	-4.53474	CA	no_hit
SLC2A1	P11166	Solute carrier family 2, facilitated glucose transporter member 1 OS=Homo sapiens OX=9606 GN=SLC2A1 PE=1 SV=2	59258	6	8.17402	0.19599	0.307756	1.32825	0.214048	0.999039	-4.53502	CA	no_hit
LDHA	P00338|P00338-2|P00338-3	L-lactate dehydrogenase A chain OS=Homo sapiens OX=9606 GN=LDHA PE=1 SV=2|Isoform 2 of L-lactate dehydrogenase A chain OS=Homo sapiens OX=9606 GN=LDHA|Isoform 3 of L-lactate dehydrogenase A chain OS=Homo sapiens OX=9606 GN=LDHA|L-lactate dehydrogenase A chain OS=Homo sapiens OX=9606 GN=LDHA PE=1 SV=2|Isoform 3 of L-lactate dehydrogenase A chain OS=Homo sapiens OX=9606 GN=LDHA	45468.3|36691.9|49223.2	19	9.47157	0.183154	0.390895	1.32774	0.214209	0.999039	-4.53514	CA	no_hit
CBL	A0A0U1RQX8|A0A0U1RR39|A0A1B0GW38|P22681	E3 ubiquitin-protein ligase CBL OS=Homo sapiens OX=9606 GN=CBL PE=1 SV=1|E3 ubiquitin-protein ligase CBL OS=Homo sapiens OX=9606 GN=CBL PE=1 SV=1|E3 ubiquitin-protein ligase CBL (Fragment) OS=Homo sapiens OX=9606 GN=CBL PE=1 SV=1|E3 ubiquitin-protein ligase CBL OS=Homo sapiens OX=9606 GN=CBL PE=1 SV=2|E3 ubiquitin-protein ligase CBL OS=Homo sapiens OX=9606 GN=CBL PE=1 SV=1|E3 ubiquitin-protein li…	112434.0|110285.0|111252.0|115178.0	5	6.43156	0.289038	-0.113891	1.3277	0.214223	0.999039	-4.53515	CA	no_hit
YY1	P25490	Transcriptional repressor protein YY1 OS=Homo sapiens OX=9606 GN=YY1 PE=1 SV=2	54875.5	7	7.23034	-0.741367	-2.36016	-1.32766	0.214234	0.999039	-4.53516	CA	no_hit
FAM49B	Q9NUQ9	Protein FAM49B OS=Homo sapiens OX=9606 GN=FAM49B PE=1 SV=1	43398.1	11	8.06508	0.157551	0.364	1.32729	0.214354	0.999039	-4.53525	CA	no_hit
GRSF1	F5H5I6|H0Y8R1|H0YAK1|Q12849	G-rich sequence factor 1 OS=Homo sapiens OX=9606 GN=GRSF1 PE=1 SV=2|G-rich sequence factor 1 (Fragment) OS=Homo sapiens OX=9606 GN=GRSF1 PE=1 SV=1|G-rich sequence factor 1 (Fragment) OS=Homo sapiens OX=9606 GN=GRSF1 PE=1 SV=1|G-rich sequence factor 1 OS=Homo sapiens OX=9606 GN=GRSF1 PE=1 SV=3	55146.5|54633.5|58336.5|60298.4	11	7.79924	-0.200141	-1.09064	-1.32709	0.214418	0.999039	-4.5353	CA	no_hit
SRP72	O76094	Signal recognition particle subunit SRP72 OS=Homo sapiens OX=9606 GN=SRP72 PE=1 SV=3	97945.7	23	8.17786	-0.542898	-0.028814	-1.32685	0.214494	0.999039	-4.53535	CA	no_hit
SRP9	P49458|P49458-2	Signal recognition particle 9 kDa protein OS=Homo sapiens OX=9606 GN=SRP9 PE=1 SV=2|Signal recognition particle 9 kDa protein OS=Homo sapiens OX=9606 GN=SRP9 PE=1 SV=2|Isoform 2 of Signal recognition particle 9 kDa protein OS=Homo sapiens OX=9606 GN=SRP9	12957.0|10562.6	6	7.88277	-0.347215	-0.418316	-1.32653	0.214594	0.999039	-4.53543	CA	no_hit
UFL1	O94874	E3 UFM1-protein ligase 1 OS=Homo sapiens OX=9606 GN=UFL1 PE=1 SV=2	109769	32	7.96518	0.204303	0.0480742	1.32612	0.214725	0.999039	-4.53553	CA	no_hit
CCT8	P50990	T-complex protein 1 subunit theta OS=Homo sapiens OX=9606 GN=CCT8 PE=1 SV=4	72625.2	39	8.83561	0.26246	0.213498	1.32396	0.215416	0.999039	-4.53604	CA	no_hit
AUH	Q13825|Q13825-2	Methylglutaconyl-CoA hydratase, mitochondrial OS=Homo sapiens OX=9606 GN=AUH PE=1 SV=1|Methylglutaconyl-CoA hydratase, mitochondrial OS=Homo sapiens OX=9606 GN=AUH PE=1 SV=1|Isoform 2 of Methylglutaconyl-CoA hydratase, mitochondrial OS=Homo sapiens OX=9606 GN=AUH	42868.0|38856.8	6	7.19423	0.1611	0.123447	1.32367	0.21551	0.999039	-4.53611	CA	no_hit
CDK2	G3V5T9|P24941	Cyclin-dependent kinase 2 OS=Homo sapiens OX=9606 GN=CDK2 PE=1 SV=1|Cyclin-dependent kinase 2 OS=Homo sapiens OX=9606 GN=CDK2 PE=1 SV=2	45941.0|40467.4	5	7.43278	0.18649	0.090502	1.32336	0.215607	0.999039	-4.53619	CA	no_hit
XPNPEP1	Q9NQW7-3	Isoform 3 of Xaa-Pro aminopeptidase 1 OS=Homo sapiens OX=9606 GN=XPNPEP1	86994.9	22	7.79542	0.185754	0.253015	1.32291	0.215754	0.999039	-4.53629	CA	no_hit
RCOR1	Q9UKL0	REST corepressor 1 OS=Homo sapiens OX=9606 GN=RCOR1 PE=1 SV=2	65577	7	7.22233	-0.412025	-0.134484	-1.32219	0.215983	0.999039	-4.53647	CA	no_hit
PLCB3	Q01970|Q01970-2	1-phosphatidylinositol 4,5-bisphosphate phosphodiesterase beta-3 OS=Homo sapiens OX=9606 GN=PLCB3 PE=1 SV=2|Isoform 2 of 1-phosphatidylinositol 4,5-bisphosphate phosphodiesterase beta-3 OS=Homo sapiens OX=9606 GN=PLCB3|1-phosphatidylinositol 4,5-bisphosphate phosphodiesterase beta-3 OS=Homo sapiens OX=9606 GN=PLCB3 PE=1 SV=2	160501.0|152304.0	17	7.19652	0.166248	-0.275943	1.3212	0.216302	0.999039	-4.5367	CA	no_hit
TPP2	P29144|Q5VZU9	Tripeptidyl-peptidase 2 OS=Homo sapiens OX=9606 GN=TPP2 PE=1 SV=4|Tripeptidyl-peptidase 2 OS=Homo sapiens OX=9606 GN=TPP2 PE=1 SV=1	164994.0|167626.0	32	7.79401	0.194334	0.271023	1.32102	0.216359	0.999039	-4.53674	CA	no_hit
ZNF330	Q9Y3S2	Zinc finger protein 330 OS=Homo sapiens OX=9606 GN=ZNF330 PE=1 SV=1	46044.5	4	6.74622	0.218248	0.167898	1.32084	0.216417	0.999039	-4.53679	CA	no_hit
ZCCHC8	Q6NZY4	Zinc finger CCHC domain-containing protein 8 OS=Homo sapiens OX=9606 GN=ZCCHC8 PE=1 SV=2	93149.3	13	6.99794	-0.206991	-0.553458	-1.32081	0.216425	0.999039	-4.53679	CA	no_hit
ZNF706	Q9Y5V0	Zinc finger protein 706 OS=Homo sapiens OX=9606 GN=ZNF706 PE=1 SV=1	12561.2	5	7.4075	-0.868868	0.0453617	-1.31962	0.216808	0.999039	-4.53708	CA	no_hit
SNX9	Q9Y5X1	Sorting nexin-9 OS=Homo sapiens OX=9606 GN=SNX9 PE=1 SV=1	80333.9	10	7.45658	-0.223018	-0.300781	-1.3194	0.216881	0.999039	-4.53713	CA	no_hit
STX18	D6RF48|Q9P2W9	Syntaxin-18 OS=Homo sapiens OX=9606 GN=STX18 PE=1 SV=1|Syntaxin-18 OS=Homo sapiens OX=9606 GN=STX18 PE=1 SV=1	41901.4|45513.3	11	7.31375	0.192561	0.190169	1.31923	0.216934	0.999039	-4.53717	CA	no_hit
YEATS4	O95619|F8W0J4	YEATS domain-containing protein 4 OS=Homo sapiens OX=9606 GN=YEATS4 PE=1 SV=1|YEATS domain-containing protein 4 OS=Homo sapiens OX=9606 GN=YEATS4 PE=1 SV=1|YEATS domain-containing protein 4 OS=Homo sapiens OX=9606 GN=YEATS4 PE=1 SV=1	34144.9|26259.6	4	6.77939	-0.238669	-0.931052	-1.31807	0.217309	0.999039	-4.53745	CA	no_hit
RPRD2	Q5VT52|Q5VT52-2	Regulation of nuclear pre-mRNA domain-containing protein 2 OS=Homo sapiens OX=9606 GN=RPRD2 PE=1 SV=1|Isoform 2 of Regulation of nuclear pre-mRNA domain-containing protein 2 OS=Homo sapiens OX=9606 GN=RPRD2	182846.0|178808.0	17	7.40857	-0.302718	0.0602575	-1.31792	0.217355	0.999039	-4.53748	CA	no_hit
TRABD	J3KPT4|Q9H4I3|Q9H4I3-2	TraB domain-containing protein OS=Homo sapiens OX=9606 GN=TRABD PE=1 SV=1|TraB domain-containing protein OS=Homo sapiens OX=9606 GN=TRABD PE=1 SV=1|Isoform 2 of TraB domain-containing protein OS=Homo sapiens OX=9606 GN=TRABD	49091.4|48416.0|42580.8	3	6.46137	0.264597	0.524782	1.31739	0.217527	0.999039	-4.53761	CA	no_hit
NOL3	H3BM67|H3BUN4|H3BUP2|O60936|O60936-1|O60936-3	Nucleolar protein 3 (Fragment) OS=Homo sapiens OX=9606 GN=NOL3 PE=1 SV=8|Nucleolar protein 3 (Fragment) OS=Homo sapiens OX=9606 GN=NOL3 PE=1 SV=1|Nucleolar protein 3 (Fragment) OS=Homo sapiens OX=9606 GN=NOL3 PE=1 SV=1|Nucleolar protein 3 OS=Homo sapiens OX=9606 GN=NOL3 PE=1 SV=2|Isoform 1 of Nucleolar protein 3 OS=Homo sapiens OX=9606 GN=NOL3|Isoform 3 of Nucleolar protein 3 OS=Homo sapiens OX=9…	15751.9|23554.3|19867.8|23756.4|26727.1|31143.0	2	6.47999	-0.881205	1.50641	-1.31693	0.217675	0.999039	-4.53772	CA	no_hit
MAD2L1	Q13257	Mitotic spindle assembly checkpoint protein MAD2A OS=Homo sapiens OX=9606 GN=MAD2L1 PE=1 SV=1	27621	8	7.72657	0.176315	0.117399	1.3165	0.217813	0.999039	-4.53782	CA	no_hit
KIF1B	A0A087WWA3|O60333|O60333-2|O60333-3|O60333-4|Q4R9M9	Kinesin-like protein KIF1B OS=Homo sapiens OX=9606 GN=KIF1B PE=1 SV=1|Kinesin-like protein KIF1B OS=Homo sapiens OX=9606 GN=KIF1B PE=1 SV=5|Isoform 2 of Kinesin-like protein KIF1B OS=Homo sapiens OX=9606 GN=KIF1B|Isoform 3 of Kinesin-like protein KIF1B OS=Homo sapiens OX=9606 GN=KIF1B|Isoform 4 of Kinesin-like protein KIF1B OS=Homo sapiens OX=9606 GN=KIF1B|Kinesin family member 1Bbeta isoform II …	234946.0|238324.0|231840.0|161425.0|238683.0|236882.0	14	7.00488	0.16742	-0.0431676	1.31503	0.21829	0.999039	-4.53817	CA	no_hit
CTIF	O43310|O43310-2	CBP80/20-dependent translation initiation factor OS=Homo sapiens OX=9606 GN=CTIF PE=1 SV=1|Isoform 2 of CBP80/20-dependent translation initiation factor OS=Homo sapiens OX=9606 GN=CTIF	78457.6|78653.8	2	6.80612	-0.206037	-0.139841	-1.31446	0.218474	0.999039	-4.53831	CA	no_hit
HMMR	O75330|O75330-2|O75330-3|O75330-4	Hyaluronan mediated motility receptor OS=Homo sapiens OX=9606 GN=HMMR PE=1 SV=2|Isoform 2 of Hyaluronan mediated motility receptor OS=Homo sapiens OX=9606 GN=HMMR|Isoform 3 of Hyaluronan mediated motility receptor OS=Homo sapiens OX=9606 GN=HMMR|Isoform 4 of Hyaluronan mediated motility receptor OS=Homo sapiens OX=9606 GN=HMMR|Hyaluronan mediated motility receptor OS=Homo sapiens OX=9606 GN=HMMR …	114260.0|111245.0|114692.0|99735.8	13	6.96906	-0.411351	-0.157212	-1.31357	0.218762	0.999039	-4.53852	CA	no_hit
IPO4	Q8TEX9|Q8TEX9-2	Importin-4 OS=Homo sapiens OX=9606 GN=IPO4 PE=1 SV=2|Isoform 2 of Importin-4 OS=Homo sapiens OX=9606 GN=IPO4	130218.0|130404.0	21	8.02657	0.180823	0.0609838	1.31345	0.218802	0.999039	-4.53855	CA	no_hit
PCF11	O94913|E9PQ01	Pre-mRNA cleavage complex 2 protein Pcf11 OS=Homo sapiens OX=9606 GN=PCF11 PE=1 SV=3|Pre-mRNA cleavage complex 2 protein Pcf11 (Fragment) OS=Homo sapiens OX=9606 GN=PCF11 PE=1 SV=8|Pre-mRNA cleavage complex 2 protein Pcf11 OS=Homo sapiens OX=9606 GN=PCF11 PE=1 SV=3	205874.0|142239.0	19	7.28055	-0.35863	-0.804655	-1.31289	0.218981	0.999039	-4.53868	CA	no_hit
SETD2	Q9BYW2	Histone-lysine N-methyltransferase SETD2 OS=Homo sapiens OX=9606 GN=SETD2 PE=1 SV=3	353716	7	6.57169	-0.320441	-0.95614	-1.31283	0.219003	0.999039	-4.5387	CA	no_hit
RDH10	Q8IZV5	Retinol dehydrogenase 10 OS=Homo sapiens OX=9606 GN=RDH10 PE=1 SV=1	44222.4	7	7.84776	0.195044	0.0771067	1.31272	0.219038	0.999039	-4.53872	CA	no_hit
PPP2R1A	P30153	Serine/threonine-protein phosphatase 2A 65 kDa regulatory subunit A alpha isoform OS=Homo sapiens OX=9606 GN=PPP2R1A PE=1 SV=4	75799.8	20	8.6951	0.191856	0.0890222	1.31134	0.219486	0.999039	-4.53905	CA	no_hit
ADCK1	Q86TW2|Q86TW2-2|Q86TW2-3	AarF domain-containing protein kinase 1 OS=Homo sapiens OX=9606 GN=ADCK1 PE=1 SV=2|Isoform 2 of AarF domain-containing protein kinase 1 OS=Homo sapiens OX=9606 GN=ADCK1|Isoform 3 of AarF domain-containing protein kinase 1 OS=Homo sapiens OX=9606 GN=ADCK1	69930.6|69073.2|60274.5	3	6.49202	0.208213	0.0675381	1.31127	0.219508	0.999039	-4.53907	CA	no_hit
ADSL	A0A0A6YY92|A0A1B0GTJ7|A0A1B0GWJ0|P30566	Adenylosuccinate lyase OS=Homo sapiens OX=9606 GN=ADSL PE=1 SV=1|Adenylosuccinate lyase OS=Homo sapiens OX=9606 GN=ADSL PE=1 SV=1|Adenylosuccinate lyase OS=Homo sapiens OX=9606 GN=ADSL PE=1 SV=1|Adenylosuccinate lyase OS=Homo sapiens OX=9606 GN=ADSL PE=1 SV=2|Adenylosuccinate lyase OS=Homo sapiens OX=9606 GN=ADSL PE=1 SV=1|Adenylosuccinate lyase OS=Homo sapiens OX=9606 GN=ADSL PE=1 SV=2	64888.2|62745.1|62720.1|63504.6	13	7.98137	0.162956	0.119959	1.31096	0.21961	0.999039	-4.53914	CA	no_hit
SIAE	Q9HAT2|Q9HAT2-2	Sialate O-acetylesterase OS=Homo sapiens OX=9606 GN=SIAE PE=1 SV=1|Sialate O-acetylesterase OS=Homo sapiens OX=9606 GN=SIAE PE=1 SV=1|Isoform 2 of Sialate O-acetylesterase OS=Homo sapiens OX=9606 GN=SIAE	66566.6|62826.6	5	6.99299	-0.300388	0.682809	-1.30951	0.220082	0.999039	-4.53949	CA	no_hit
HIBCH	Q6NVY1	3-hydroxyisobutyryl-CoA hydrolase, mitochondrial OS=Homo sapiens OX=9606 GN=HIBCH PE=1 SV=2	53531.1	14	7.65497	0.160165	0.411348	1.30941	0.220113	0.999039	-4.53951	CA	no_hit
CCT6A	P40227	T-complex protein 1 subunit zeta OS=Homo sapiens OX=9606 GN=CCT6A PE=1 SV=3	72133.1	27	8.71495	0.187736	0.327946	1.30897	0.220256	0.999039	-4.53961	CA	no_hit
DMAC2L	A0A5K1VW60|Q99766|A0A2R8YDJ1	ATP synthase subunit s, mitochondrial OS=Homo sapiens OX=9606 GN=DMAC2L PE=4 SV=1|ATP synthase subunit s, mitochondrial OS=Homo sapiens OX=9606 GN=DMAC2L PE=1 SV=3|ATP synthase subunit s, mitochondrial (Fragment) OS=Homo sapiens OX=9606 GN=DMAC2L PE=1 SV=1|ATP synthase subunit s, mitochondrial OS=Homo sapiens OX=9606 GN=DMAC2L PE=4 SV=1|ATP synthase subunit s, mitochondrial OS=Homo sapiens OX=960…	28534.4|30344.1|25911.7	6	7.15795	0.196688	0.194265	1.30842	0.220435	0.999039	-4.53974	CA	no_hit
GOLGA2	A0A2Q2TH77|Q08379	Golgin subfamily A member 2 OS=Homo sapiens OX=9606 GN=GOLGA2 PE=1 SV=1|Golgin subfamily A member 2 OS=Homo sapiens OX=9606 GN=GOLGA2 PE=1 SV=3	129557.0|130984.0	16	7.33594	-0.206985	0.0987645	-1.3084	0.220444	0.999039	-4.53975	CA	no_hit
RETSAT	Q6NUM9	All-trans-retinol 13,14-reductase OS=Homo sapiens OX=9606 GN=RETSAT PE=1 SV=2	78716.6	22	7.93314	0.174238	0.0480976	1.30792	0.220601	0.999039	-4.53986	CA	no_hit
UBLCP1	Q8WVY7	Ubiquitin-like domain-containing CTD phosphatase 1 OS=Homo sapiens OX=9606 GN=UBLCP1 PE=1 SV=2	47181.3	12	7.84152	0.194899	0.336528	1.30758	0.220709	0.999039	-4.53994	CA	no_hit
YLPM1	P49750	YLP motif-containing protein 1 OS=Homo sapiens OX=9606 GN=YLPM1 PE=1 SV=4	272752	49	7.80255	-0.445013	-1.82488	-1.30675	0.220981	0.999039	-4.54014	CA	no_hit
MBD2	Q9UBB5	Methyl-CpG-binding domain protein 2 OS=Homo sapiens OX=9606 GN=MBD2 PE=1 SV=1	51783.6	4	6.74441	-0.431947	-0.679229	-1.30659	0.221034	0.999039	-4.54018	CA	no_hit
SUPT6H	Q7KZ85|Q7KZ85-2	Transcription elongation factor SPT6 OS=Homo sapiens OX=9606 GN=SUPT6H PE=1 SV=2|Transcription elongation factor SPT6 OS=Homo sapiens OX=9606 GN=SUPT6H PE=1 SV=2|Isoform 2 of Transcription elongation factor SPT6 OS=Homo sapiens OX=9606 GN=SUPT6H	236100.0|72556.0	38	7.74035	-0.49049	-1.61095	-1.30657	0.22104	0.999039	-4.54018	CA	no_hit
ALDH7A1	A0A1B0GTG2|A0A1B0GW77|P49419|P49419-2	Alpha-aminoadipic semialdehyde dehydrogenase OS=Homo sapiens OX=9606 GN=ALDH7A1 PE=1 SV=1|Alpha-aminoadipic semialdehyde dehydrogenase OS=Homo sapiens OX=9606 GN=ALDH7A1 PE=1 SV=1|Alpha-aminoadipic semialdehyde dehydrogenase OS=Homo sapiens OX=9606 GN=ALDH7A1 PE=1 SV=5|Isoform 2 of Alpha-aminoadipic semialdehyde dehydrogenase OS=Homo sapiens OX=9606 GN=ALDH7A1	67799.4|70109.6|68146.5|64362.4	19	8.31078	0.211528	0.492426	1.30629	0.221132	0.999039	-4.54025	CA	no_hit
CYP2S1	Q96SQ9|Q96SQ9-2	Cytochrome P450 2S1 OS=Homo sapiens OX=9606 GN=CYP2S1 PE=1 SV=2|Isoform 2 of Cytochrome P450 2S1 OS=Homo sapiens OX=9606 GN=CYP2S1	60572.4|68199.5	11	7.79804	0.152154	0.157378	1.30595	0.221244	0.999039	-4.54033	CA	no_hit
ARL8B	Q9NVJ2	ADP-ribosylation factor-like protein 8B OS=Homo sapiens OX=9606 GN=ARL8B PE=1 SV=1	25707.9	4	7.61942	0.238977	0.13598	1.30534	0.221444	0.999039	-4.54048	CA	no_hit
EWSR1	B0QYK0|Q01844|Q01844-3|Q01844-5|Q01844-6	RNA-binding protein EWS OS=Homo sapiens OX=9606 GN=EWSR1 PE=1 SV=1|RNA-binding protein EWS OS=Homo sapiens OX=9606 GN=EWSR1 PE=1 SV=1|Isoform 3 of RNA-binding protein EWS OS=Homo sapiens OX=9606 GN=EWSR1|Isoform 5 of RNA-binding protein EWS OS=Homo sapiens OX=9606 GN=EWSR1|Isoform 6 of RNA-binding protein EWS OS=Homo sapiens OX=9606 GN=EWSR1	70345.7|74196.5|74109.5|74683.8|67925.6	8	8.39675	-0.20376	-0.524499	-1.30399	0.221884	0.999039	-4.5408	CA	no_hit
EEF2	P13639	Elongation factor 2 OS=Homo sapiens OX=9606 GN=EEF2 PE=1 SV=4	116020	53	9.2394	0.206094	0.144015	1.30359	0.222017	0.999039	-4.54089	CA	no_hit
UPF3B	Q9BZI7|Q9BZI7-2	Regulator of nonsense transcripts 3B OS=Homo sapiens OX=9606 GN=UPF3B PE=1 SV=1|Isoform 2 of Regulator of nonsense transcripts 3B OS=Homo sapiens OX=9606 GN=UPF3B	80656.7|78804.6	7	6.46411	0.799506	-1.48792	1.30316	0.222157	0.999039	-4.54099	CA	no_hit
EHD2	Q9NZN4	EH domain-containing protein 2 OS=Homo sapiens OX=9606 GN=EHD2 PE=1 SV=2	72853.6	19	8.09829	0.180526	-0.00311336	1.30315	0.222159	0.999039	-4.54099	CA	no_hit
TARS3	A2RTX5	Threonine--tRNA ligase 2, cytoplasmic OS=Homo sapiens OX=9606 GN=TARS3 PE=1 SV=1	110648	5	6.48902	0.222345	-0.0322413	1.30128	0.222774	0.999039	-4.54144	CA	no_hit
CACUL1	Q86Y37|Q86Y37-4	CDK2-associated and cullin domain-containing protein 1 OS=Homo sapiens OX=9606 GN=CACUL1 PE=1 SV=1|CDK2-associated and cullin domain-containing protein 1 OS=Homo sapiens OX=9606 GN=CACUL1 PE=1 SV=1|Isoform 4 of CDK2-associated and cullin domain-containing protein 1 OS=Homo sapiens OX=9606 GN=CACUL1	47406.7|33066.5	4	6.68948	-0.359892	0.148506	-1.3012	0.222802	0.999039	-4.54146	CA	no_hit
CNOT10	Q9H9A5|Q9H9A5-2	CCR4-NOT transcription complex subunit 10 OS=Homo sapiens OX=9606 GN=CNOT10 PE=1 SV=1|Isoform 2 of CCR4-NOT transcription complex subunit 10 OS=Homo sapiens OX=9606 GN=CNOT10	100434.0|100304.0	13	7.02445	-0.234949	-0.0541027	-1.30114	0.222821	0.999039	-4.54147	CA	no_hit
CEP85	H7BZW2|Q6P2H3|Q6P2H3-2|Q6P2H3-4	Centrosomal protein of 85 kDa (Fragment) OS=Homo sapiens OX=9606 GN=CEP85 PE=1 SV=1|Centrosomal protein of 85 kDa OS=Homo sapiens OX=9606 GN=CEP85 PE=1 SV=1|Isoform 2 of Centrosomal protein of 85 kDa OS=Homo sapiens OX=9606 GN=CEP85|Isoform 4 of Centrosomal protein of 85 kDa OS=Homo sapiens OX=9606 GN=CEP85	61302.3|100264.0|100193.0|94512.2	5	6.60964	-0.457206	-0.12229	-1.30074	0.222952	0.999039	-4.54157	CA	no_hit
RALBP1	Q15311	RalA-binding protein 1 OS=Homo sapiens OX=9606 GN=RALBP1 PE=1 SV=3	98318.3	6	6.90638	-0.260628	-0.180711	-1.30025	0.223113	0.999039	-4.54168	CA	no_hit
PLSCR1	C9J7K9|O15162|O15162-2	Phospholipid scramblase OS=Homo sapiens OX=9606 GN=PLSCR1 PE=1 SV=1|Phospholipid scramblase 1 OS=Homo sapiens OX=9606 GN=PLSCR1 PE=1 SV=1|Isoform 2 of Phospholipid scramblase 1 OS=Homo sapiens OX=9606 GN=PLSCR1	38567.2|39702.7|31788.3	6	7.40076	0.217748	0.0659944	1.29927	0.223438	0.999039	-4.54192	CA	no_hit
SARG	Q9BW04|Q9BW04-2	Specifically androgen-regulated gene protein OS=Homo sapiens OX=9606 GN=SARG PE=1 SV=2|Isoform 2 of Specifically androgen-regulated gene protein OS=Homo sapiens OX=9606 GN=SARG|Specifically androgen-regulated gene protein OS=Homo sapiens OX=9606 GN=SARG PE=1 SV=2	73945.2|46436.8	3	6.61749	-0.494765	0.280854	-1.29899	0.223529	0.999039	-4.54198	CA	no_hit
OCRL	Q01968	Inositol polyphosphate 5-phosphatase OCRL OS=Homo sapiens OX=9606 GN=OCRL PE=1 SV=3	123036	19	7.48171	0.191468	-0.0884184	1.29891	0.223557	0.999039	-4.542	CA	no_hit
C19orf47	Q8N9M1|Q8N9M1-2	Uncharacterized protein C19orf47 OS=Homo sapiens OX=9606 GN=C19orf47 PE=1 SV=1|Isoform 2 of Uncharacterized protein C19orf47 OS=Homo sapiens OX=9606 GN=C19orf47	54015.7|46709.1	3	6.66991	-0.245665	-0.741317	-1.29879	0.223595	0.999039	-4.54203	CA	no_hit
YAP1	P46937|P46937-6|P46937-7|P46937-9	Transcriptional coactivator YAP1 OS=Homo sapiens OX=9606 GN=YAP1 PE=1 SV=2|Isoform 6 of Transcriptional coactivator YAP1 OS=Homo sapiens OX=9606 GN=YAP1|Isoform 7 of Transcriptional coactivator YAP1 OS=Homo sapiens OX=9606 GN=YAP1|Isoform 9 of Transcriptional coactivator YAP1 OS=Homo sapiens OX=9606 GN=YAP1	58743.4|53664.8|54145.1|59223.7	3	6.82894	-0.464895	-0.057786	-1.29862	0.223651	0.999039	-4.54207	CA	no_hit
LRRC14	Q15048	Leucine-rich repeat-containing protein 14 OS=Homo sapiens OX=9606 GN=LRRC14 PE=1 SV=1	57767.4	3	6.73796	0.286283	0.205844	1.29845	0.223707	0.999039	-4.54211	CA	no_hit
BRD7	Q9NPI1|Q9NPI1-2	Bromodomain-containing protein 7 OS=Homo sapiens OX=9606 GN=BRD7 PE=1 SV=1|Isoform 2 of Bromodomain-containing protein 7 OS=Homo sapiens OX=9606 GN=BRD7	94930.3|95058.3	2	6.55122	-0.344404	-1.74072	-1.29718	0.224127	0.999039	-4.54241	CA	no_hit
DLAT	P10515	Dihydrolipoyllysine-residue acetyltransferase component of pyruvate dehydrogenase complex, mitochondrial OS=Homo sapiens OX=9606 GN=DLAT PE=1 SV=3	80721.9	16	7.97905	0.322843	0.68246	1.29619	0.224453	0.999039	-4.54264	CA	no_hit
DPP3	Q9NY33	Dipeptidyl peptidase 3 OS=Homo sapiens OX=9606 GN=DPP3 PE=1 SV=2	92918.8	26	8.20849	0.161933	0.421778	1.29585	0.224567	0.999039	-4.54272	CA	no_hit
PPP2R5E	Q16537|Q16537-2	Serine/threonine-protein phosphatase 2A 56 kDa regulatory subunit epsilon isoform OS=Homo sapiens OX=9606 GN=PPP2R5E PE=1 SV=1|Isoform 2 of Serine/threonine-protein phosphatase 2A 56 kDa regulatory subunit epsilon isoform OS=Homo sapiens OX=9606 GN=PPP2R5E	66319.3|65358.7	8	7.46554	0.202064	-0.116994	1.29525	0.224768	0.999039	-4.54287	CA	no_hit
BEND3	Q5T5X7	BEN domain-containing protein 3 OS=Homo sapiens OX=9606 GN=BEND3 PE=1 SV=1	110766	3	6.17018	-0.408991	-1.53781	-1.29512	0.224808	0.999039	-4.5429	CA	no_hit
MX1	F8W8T1|P20591	Interferon-induced GTP-binding protein Mx1 OS=Homo sapiens OX=9606 GN=MX1 PE=1 SV=1|Interferon-induced GTP-binding protein Mx1 OS=Homo sapiens OX=9606 GN=MX1 PE=1 SV=4|Interferon-induced GTP-binding protein Mx1 OS=Homo sapiens OX=9606 GN=MX1 PE=1 SV=4	89203.8|91691.1	10	7.16979	0.354632	-0.0729344	1.29477	0.224926	0.999039	-4.54298	CA	no_hit
TAP1	A0A140T9T7|Q03518	Antigen peptide transporter 1 OS=Homo sapiens OX=9606 GN=TAP1 PE=1 SV=1|Antigen peptide transporter 1 OS=Homo sapiens OX=9606 GN=TAP1 PE=1 SV=2|Antigen peptide transporter 1 OS=Homo sapiens OX=9606 GN=TAP1 PE=1 SV=2	94079.2|94121.3	10	7.66267	0.181221	0.230937	1.29452	0.225007	0.999039	-4.54304	CA	no_hit
GDA	Q9Y2T3|Q9Y2T3-3|Q5SZC5	Guanine deaminase OS=Homo sapiens OX=9606 GN=GDA PE=1 SV=1|Isoform 3 of Guanine deaminase OS=Homo sapiens OX=9606 GN=GDA|Guanine deaminase (Fragment) OS=Homo sapiens OX=9606 GN=GDA PE=1 SV=1|Guanine deaminase OS=Homo sapiens OX=9606 GN=GDA PE=1 SV=1|Isoform 3 of Guanine deaminase OS=Homo sapiens OX=9606 GN=GDA	59393.1|61530.3|26166.9	10	7.43499	0.240224	0.307718	1.29394	0.2252	0.999039	-4.54317	CA	no_hit
SLC26A6	G3XAC1|Q9BXS9|Q9BXS9-3|Q9BXS9-7	Solute carrier family 26 member 6 OS=Homo sapiens OX=9606 GN=SLC26A6 PE=1 SV=1|Solute carrier family 26 member 6 OS=Homo sapiens OX=9606 GN=SLC26A6 PE=1 SV=1|Isoform 3 of Solute carrier family 26 member 6 OS=Homo sapiens OX=9606 GN=SLC26A6|Isoform 7 of Solute carrier family 26 member 6 OS=Homo sapiens OX=9606 GN=SLC26A6	81985.0|93713.2|93585.1|89832.1	7	7.13519	0.185207	0.0646348	1.2927	0.225611	0.999039	-4.54347	CA	no_hit
CDH17	Q12864	Cadherin-17 OS=Homo sapiens OX=9606 GN=CDH17 PE=2 SV=3	106250	8	7.15322	-0.208785	0.416368	-1.29255	0.225664	0.999039	-4.5435	CA	no_hit
DERA	Q9Y315	Deoxyribose-phosphate aldolase OS=Homo sapiens OX=9606 GN=DERA PE=1 SV=2	42186.1	12	7.88248	0.243992	-0.0349743	1.29195	0.225862	0.999039	-4.54365	CA	no_hit
COPG1	Q9Y678	Coatomer subunit gamma-1 OS=Homo sapiens OX=9606 GN=COPG1 PE=1 SV=1	115394	28	8.51537	0.183565	0.101808	1.29132	0.22607	0.999039	-4.54379	CA	no_hit
PSPH	C9JBI3|P78330	Phosphoserine phosphatase (Fragment) OS=Homo sapiens OX=9606 GN=PSPH PE=1 SV=1|Phosphoserine phosphatase OS=Homo sapiens OX=9606 GN=PSPH PE=1 SV=2	24553.3|29421.9	10	7.97082	0.156562	0.400227	1.29045	0.226361	0.999039	-4.544	CA	no_hit
RWDD1	Q9H446	RWD domain-containing protein 1 OS=Homo sapiens OX=9606 GN=RWDD1 PE=1 SV=1	33702.3	3	7.23054	-0.266386	0.677821	-1.28971	0.226609	0.999039	-4.54417	CA	no_hit
CAP2	P40123	Adenylyl cyclase-associated protein 2 OS=Homo sapiens OX=9606 GN=CAP2 PE=1 SV=1	62810.6	14	7.65266	0.186043	0.481888	1.28952	0.226671	0.999039	-4.54422	CA	no_hit
PRMT5	O14744	Protein arginine N-methyltransferase 5 OS=Homo sapiens OX=9606 GN=PRMT5 PE=1 SV=4	82143.8	19	8.22662	0.185593	0.19514	1.28935	0.226727	0.999039	-4.54426	CA	no_hit
RANBP6	O60518	Ran-binding protein 6 OS=Homo sapiens OX=9606 GN=RANBP6 PE=1 SV=2	145338	11	7.12435	0.164078	0.0908424	1.28798	0.227187	0.999039	-4.54458	CA	no_hit
CKAP2	Q8WWK9|Q8WWK9-5|Q8WWK9-6	Cytoskeleton-associated protein 2 OS=Homo sapiens OX=9606 GN=CKAP2 PE=1 SV=1|Isoform 3 of Cytoskeleton-associated protein 2 OS=Homo sapiens OX=9606 GN=CKAP2|Isoform 4 of Cytoskeleton-associated protein 2 OS=Homo sapiens OX=9606 GN=CKAP2	100325.0|100238.0|93015.5	6	6.7683	-0.358759	-1.14371	-1.28771	0.227277	0.999039	-4.54465	CA	no_hit
CSNK2A1	A0A2R8YD58|E7EU96|P68400	Casein kinase II subunit alpha OS=Homo sapiens OX=9606 GN=CSNK2A1 PE=1 SV=1|Casein kinase II subunit alpha OS=Homo sapiens OX=9606 GN=CSNK2A1 PE=1 SV=1|Casein kinase II subunit alpha OS=Homo sapiens OX=9606 GN=CSNK2A1 PE=1 SV=1	51558.1|53058.1|52225.6	15	8.13321	-0.191946	-0.104743	-1.28743	0.22737	0.999039	-4.54471	CA	no_hit
RAB8B	Q92930	Ras-related protein Rab-8B OS=Homo sapiens OX=9606 GN=RAB8B PE=1 SV=2	29824.3	5	7.74819	0.194551	-0.0516662	1.28701	0.22751	0.999039	-4.54481	CA	no_hit
MTFR1	H0YBZ4|H0YF01|Q15390|Q15390-2	Mitochondrial fission regulator 1 (Fragment) OS=Homo sapiens OX=9606 GN=MTFR1 PE=1 SV=1|Mitochondrial fission regulator 1 (Fragment) OS=Homo sapiens OX=9606 GN=MTFR1 PE=1 SV=1|Mitochondrial fission regulator 1 OS=Homo sapiens OX=9606 GN=MTFR1 PE=1 SV=2|Isoform 2 of Mitochondrial fission regulator 1 OS=Homo sapiens OX=9606 GN=MTFR1|Mitochondrial fission regulator 1 (Fragment) OS=Homo sapiens OX=96…	39438.5|28343.2|45362.0|40898.5	3	6.57769	-0.269596	0.433615	-1.28644	0.227703	0.999039	-4.54495	CA	no_hit
RAB27B	O00194	Ras-related protein Rab-27B OS=Homo sapiens OX=9606 GN=RAB27B PE=1 SV=4	29383.4	5	7.3949	0.201748	-0.0182965	1.28608	0.227821	0.999039	-4.54503	CA	no_hit
FMNL2	Q96PY5-3	Isoform 2 of Formin-like protein 2 OS=Homo sapiens OX=9606 GN=FMNL2	151806	6	6.68877	0.391197	-0.818209	1.28573	0.22794	0.999039	-4.54511	CA	no_hit
ILK	A0A0A0MTH3|Q13418	Integrin-linked protein kinase OS=Homo sapiens OX=9606 GN=ILK PE=1 SV=1|Integrin-linked protein kinase OS=Homo sapiens OX=9606 GN=ILK PE=1 SV=2	63170.2|59808.5	18	7.86144	0.159419	0.187754	1.28552	0.22801	0.999039	-4.54516	CA	no_hit
FIP1L1	Q6UN15-3|Q6UN15-5|Q6UN15|Q6UN15-4	Isoform 3 of Pre-mRNA 3'-end-processing factor FIP1 OS=Homo sapiens OX=9606 GN=FIP1L1|Isoform 5 of Pre-mRNA 3'-end-processing factor FIP1 OS=Homo sapiens OX=9606 GN=FIP1L1|Pre-mRNA 3'-end-processing factor FIP1 OS=Homo sapiens OX=9606 GN=FIP1L1 PE=1 SV=1|Isoform 3 of Pre-mRNA 3'-end-processing factor FIP1 OS=Homo sapiens OX=9606 GN=FIP1L1|Isoform 4 of Pre-mRNA 3'-end-processing factor FIP1 OS=Hom…	66611.3|74928.5|76031.0|47008.2	6	7.20728	-0.430005	-2.80491	-1.28512	0.228145	0.999039	-4.54526	CA	no_hit
UBTF	P17480|P17480-2	Nucleolar transcription factor 1 OS=Homo sapiens OX=9606 GN=UBTF PE=1 SV=1|Nucleolar transcription factor 1 OS=Homo sapiens OX=9606 GN=UBTF PE=1 SV=1|Isoform UBF2 of Nucleolar transcription factor 1 OS=Homo sapiens OX=9606 GN=UBTF	121634.0|114734.0	14	7.35367	0.5264	-3.29169	1.28505	0.228168	0.999039	-4.54527	CA	no_hit
RINT1	Q6NUQ1	RAD50-interacting protein 1 OS=Homo sapiens OX=9606 GN=RINT1 PE=1 SV=1	105974	8	7.40646	0.20561	0.089223	1.28493	0.228207	0.999039	-4.5453	CA	no_hit
GTF2B	Q00403	Transcription initiation factor IIB OS=Homo sapiens OX=9606 GN=GTF2B PE=1 SV=1	41103.8	10	7.03847	0.178302	-0.158944	1.28473	0.228274	0.999039	-4.54535	CA	no_hit
ABCC4	O15439|O15439-2	Multidrug resistance-associated protein 4 OS=Homo sapiens OX=9606 GN=ABCC4 PE=1 SV=3|Isoform 2 of Multidrug resistance-associated protein 4 OS=Homo sapiens OX=9606 GN=ABCC4	173160.0|167228.0	22	7.49949	0.179654	0.232152	1.28424	0.228438	0.999039	-4.54546	CA	no_hit
SPG21	Q9NZD8|H0YKB0|H0YKM6|H0YLT5|H0YMB7	Maspardin OS=Homo sapiens OX=9606 GN=SPG21 PE=1 SV=1|Maspardin (Fragment) OS=Homo sapiens OX=9606 GN=SPG21 PE=1 SV=1|Maspardin OS=Homo sapiens OX=9606 GN=SPG21 PE=1 SV=1|Maspardin (Fragment) OS=Homo sapiens OX=9606 GN=SPG21 PE=1 SV=8|Maspardin (Fragment) OS=Homo sapiens OX=9606 GN=SPG21 PE=1 SV=1|Maspardin OS=Homo sapiens OX=9606 GN=SPG21 PE=1 SV=1	40090.1|19780.5|17487.3|13793.4|18705.0	6	7.42797	0.164698	-0.105006	1.28313	0.228813	0.999039	-4.54572	CA	no_hit
TMEM70	Q9BUB7	Transmembrane protein 70, mitochondrial OS=Homo sapiens OX=9606 GN=TMEM70 PE=1 SV=2	32772.4	4	7.31633	0.18204	0.290623	1.28209	0.229164	0.999039	-4.54597	CA	no_hit
QKI	Q96PU8|Q96PU8-3|Q96PU8-5|Q96PU8-6|Q96PU8-8|Q96PU8-9	Protein quaking OS=Homo sapiens OX=9606 GN=QKI PE=1 SV=1|Isoform 2 of Protein quaking OS=Homo sapiens OX=9606 GN=QKI|Protein quaking OS=Homo sapiens OX=9606 GN=QKI PE=1 SV=1|Isoform 2 of Protein quaking OS=Homo sapiens OX=9606 GN=QKI|Isoform 3 of Protein quaking OS=Homo sapiens OX=9606 GN=QKI|Isoform 4 of Protein quaking OS=Homo sapiens OX=9606 GN=QKI|Isoform 5 of Protein quaking OS=Homo sapiens …	45061.7|44317.3|42321.1|43065.5|42640.4|42523.4	7	7.19515	-0.413106	0.723	-1.27911	0.230168	0.999039	-4.54667	CA	no_hit
FSCN1	Q16658	Fascin OS=Homo sapiens OX=9606 GN=FSCN1 PE=1 SV=3	63641.1	22	8.4119	0.202314	0.24472	1.27901	0.230201	0.999039	-4.54669	CA	no_hit
CCDC51	Q96ER9	Mitochondrial potassium channel OS=Homo sapiens OX=9606 GN=CCDC51 PE=1 SV=2	50878.2	12	7.41868	0.178505	0.567133	1.27724	0.230802	0.999039	-4.54711	CA	no_hit
WDFY1	Q8IWB7	WD repeat and FYVE domain-containing protein 1 OS=Homo sapiens OX=9606 GN=WDFY1 PE=1 SV=1	53099.6	10	7.27944	0.189682	0.202726	1.27651	0.231049	0.999039	-4.54728	CA	no_hit
RPS18	P62269	40S ribosomal protein S18 OS=Homo sapiens OX=9606 GN=RPS18 PE=1 SV=3	22575.2	12	8.82413	0.529167	-3.34874	1.2761	0.231189	0.999039	-4.54738	CA	no_hit
CAPN1	P07384	Calpain-1 catalytic subunit OS=Homo sapiens OX=9606 GN=CAPN1 PE=1 SV=1	93721.1	27	8.23565	0.162381	0.10223	1.27513	0.231516	0.999039	-4.5476	CA	no_hit
IPO8	O15397	Importin-8 OS=Homo sapiens OX=9606 GN=IPO8 PE=1 SV=2	137980	13	7.38903	0.177474	0.187685	1.27449	0.231733	0.999039	-4.54775	CA	no_hit
EDEM3	Q9BZQ6-2	Isoform 2 of ER degradation-enhancing alpha-mannosidase-like protein 3 OS=Homo sapiens OX=9606 GN=EDEM3	117664	6	6.7105	0.172073	0.501152	1.27415	0.231848	0.999039	-4.54783	CA	no_hit
COMT	P21964|P21964-2	Catechol O-methyltransferase OS=Homo sapiens OX=9606 GN=COMT PE=1 SV=2|Isoform Soluble of Catechol O-methyltransferase OS=Homo sapiens OX=9606 GN=COMT	34732.7|29091.4	12	8.12748	0.177272	0.286242	1.27332	0.232132	0.999039	-4.54803	CA	no_hit
IPO11	Q9UI26|Q9UI26-2|F8WDV0	Importin-11 OS=Homo sapiens OX=9606 GN=IPO11 PE=1 SV=1|Isoform 2 of Importin-11 OS=Homo sapiens OX=9606 GN=IPO11|Importin-11 OS=Homo sapiens OX=9606 GN=IPO11 PE=1 SV=1|Importin-11 OS=Homo sapiens OX=9606 GN=IPO11 PE=1 SV=1|Isoform 2 of Importin-11 OS=Homo sapiens OX=9606 GN=IPO11	127787.0|132922.0|112116.0	10	7.46792	0.181221	0.141188	1.27306	0.232219	0.999039	-4.54809	CA	no_hit
GHDC	Q8N2G8|Q8N2G8-3	GH3 domain-containing protein OS=Homo sapiens OX=9606 GN=GHDC PE=1 SV=2|Isoform 3 of GH3 domain-containing protein OS=Homo sapiens OX=9606 GN=GHDC	60795.4|56489.2	14	7.5026	0.163009	0.0565749	1.27283	0.232297	0.999039	-4.54814	CA	no_hit
QSER1	A0A3B3IRW6|Q2KHR3|Q2KHR3-2	Glutamine and serine-rich protein 1 OS=Homo sapiens OX=9606 GN=QSER1 PE=1 SV=1|Glutamine and serine-rich protein 1 OS=Homo sapiens OX=9606 GN=QSER1 PE=1 SV=3|Isoform 2 of Glutamine and serine-rich protein 1 OS=Homo sapiens OX=9606 GN=QSER1	240129.0|226494.0|202351.0	10	6.89364	-0.398994	-0.470919	-1.2725	0.232412	0.999039	-4.54822	CA	no_hit
LGALS1	P09382	Galectin-1 OS=Homo sapiens OX=9606 GN=LGALS1 PE=1 SV=2	17482	9	8.66347	0.487851	-0.577873	1.27229	0.232481	0.999039	-4.54827	CA	no_hit
PSMB6	P28072	Proteasome subunit beta type-6 OS=Homo sapiens OX=9606 GN=PSMB6 PE=1 SV=4	26786.4	7	8.51883	0.30941	0.467701	1.27206	0.232563	0.999039	-4.54833	CA	no_hit
TRAPPC2L	H3BP13|A0A0B4J294|Q9UL33|Q9UL33-2	Trafficking protein particle complex subunit 2-like protein OS=Homo sapiens OX=9606 GN=TRAPPC2L PE=1 SV=1|Trafficking protein particle complex subunit 2-like protein OS=Homo sapiens OX=9606 GN=TRAPPC2L PE=1 SV=1|Trafficking protein particle complex subunit 2-like protein OS=Homo sapiens OX=9606 GN=TRAPPC2L PE=1 SV=1|Trafficking protein particle complex subunit 2-like protein OS=Homo sapiens OX=96…	31638.7|19269.9|18739.6|18652.6	3	6.67905	-0.191303	0.376368	-1.27181	0.232646	0.999039	-4.54838	CA	no_hit
H0YIV9	H0YIV9	Uncharacterized protein (Fragment) OS=Homo sapiens OX=9606 PE=3 SV=1	20340.5	5	7.00692	-0.430051	0.793004	-1.27167	0.232693	0.999039	-4.54842	CA	no_hit
TTC27	Q6P3X3	Tetratricopeptide repeat protein 27 OS=Homo sapiens OX=9606 GN=TTC27 PE=1 SV=1	112789	13	7.26344	0.229864	-0.0682315	1.27114	0.232875	0.999039	-4.54854	CA	no_hit
ERLIN1	O75477	Erlin-1 OS=Homo sapiens OX=9606 GN=ERLIN1 PE=1 SV=2	48747.9	13	8.0257	0.262188	0.10908	1.27066	0.233038	0.999039	-4.54865	CA	no_hit
BOD1L1	Q8NFC6	Biorientation of chromosomes in cell division protein 1-like 1 OS=Homo sapiens OX=9606 GN=BOD1L1 PE=1 SV=2	419132	30	7.20941	-0.315813	-0.56175	-1.27042	0.233119	0.999039	-4.54871	CA	no_hit
CSTF3	E9PLP8|Q12996	Cleavage stimulation factor subunit 3 OS=Homo sapiens OX=9606 GN=CSTF3 PE=1 SV=2|Cleavage stimulation factor subunit 3 OS=Homo sapiens OX=9606 GN=CSTF3 PE=1 SV=1|Cleavage stimulation factor subunit 3 OS=Homo sapiens OX=9606 GN=CSTF3 PE=1 SV=1	105897.0|102490.0	17	7.77082	-0.516687	-0.626182	-1.2704	0.233129	0.999039	-4.54871	CA	no_hit
KIFBP	A0A1B0GUA3|Q96EK5	KIF-binding protein OS=Homo sapiens OX=9606 GN=KIFBP PE=1 SV=1|KIF-binding protein OS=Homo sapiens OX=9606 GN=KIFBP PE=1 SV=1	88501.3|85229.3	13	7.59859	0.180783	0.155068	1.27038	0.233135	0.999039	-4.54872	CA	no_hit
DECR1	Q16698|Q16698-2	2,4-dienoyl-CoA reductase, mitochondrial OS=Homo sapiens OX=9606 GN=DECR1 PE=1 SV=1|Isoform 2 of 2,4-dienoyl-CoA reductase, mitochondrial OS=Homo sapiens OX=9606 GN=DECR1	43935.1|43109.6	12	8.10755	-0.286651	-1.28129	-1.27007	0.23324	0.999039	-4.54879	CA	no_hit
XPOT	O43592	Exportin-T OS=Homo sapiens OX=9606 GN=XPOT PE=1 SV=2	126967	19	7.71717	0.196828	0.193473	1.2697	0.233367	0.999039	-4.54888	CA	no_hit
GALNT2	Q10471|Q10471-2	Polypeptide N-acetylgalactosaminyltransferase 2 OS=Homo sapiens OX=9606 GN=GALNT2 PE=1 SV=1|Isoform 2 of Polypeptide N-acetylgalactosaminyltransferase 2 OS=Homo sapiens OX=9606 GN=GALNT2	75775.8|34533.3	19	8.0716	-0.218446	0.192942	-1.26958	0.233409	0.999039	-4.54891	CA	no_hit
PTBP3	O95758|O95758-1|O95758-4|O95758-5|O95758-6|O95758-2	Polypyrimidine tract-binding protein 3 OS=Homo sapiens OX=9606 GN=PTBP3 PE=1 SV=2|Isoform 1 of Polypyrimidine tract-binding protein 3 OS=Homo sapiens OX=9606 GN=PTBP3|Isoform 4 of Polypyrimidine tract-binding protein 3 OS=Homo sapiens OX=9606 GN=PTBP3|Isoform 5 of Polypyrimidine tract-binding protein 3 OS=Homo sapiens OX=9606 GN=PTBP3|Isoform 6 of Polypyrimidine tract-binding protein 3 OS=Homo sa…	69367.6|65877.7|70399.1|69686.7|66196.9|67934.5	5	7.49914	0.246644	-1.14098	1.26927	0.233513	0.999039	-4.54898	CA	no_hit
ZNF800	Q2TB10	Zinc finger protein 800 OS=Homo sapiens OX=9606 GN=ZNF800 PE=1 SV=1	101084	5	6.56756	-0.517191	-2.58336	-1.26917	0.233547	0.999039	-4.549	CA	no_hit
ECH1	Q13011	Delta(3,5)-Delta(2,4)-dienoyl-CoA isomerase, mitochondrial OS=Homo sapiens OX=9606 GN=ECH1 PE=1 SV=2	41307	16	8.9739	0.198408	0.469921	1.26892	0.233634	0.999039	-4.54906	CA	no_hit
DNAJB11	Q9UBS4	DnaJ homolog subfamily B member 11 OS=Homo sapiens OX=9606 GN=DNAJB11 PE=1 SV=1	48378.9	11	7.89203	-0.187096	0.379325	-1.26873	0.233699	0.999039	-4.54911	CA	no_hit
TBC1D24	A0A2R8Y518|H3BV07|Q9ULP9|Q9ULP9-2	TBC1 domain family member 24 (Fragment) OS=Homo sapiens OX=9606 GN=TBC1D24 PE=1 SV=1|TBC1 domain family member 24 (Fragment) OS=Homo sapiens OX=9606 GN=TBC1D24 PE=1 SV=9|TBC1 domain family member 24 OS=Homo sapiens OX=9606 GN=TBC1D24 PE=1 SV=2|Isoform 2 of TBC1 domain family member 24 OS=Homo sapiens OX=9606 GN=TBC1D24	62987.8|62322.6|73754.0|72848.4	7	6.96439	0.200574	0.268005	1.26796	0.233962	0.999039	-4.54928	CA	no_hit
GSK3B	A0A3B3ITW1|P49841|P49841-2	Glycogen synthase kinase-3 beta OS=Homo sapiens OX=9606 GN=GSK3B PE=1 SV=1|Glycogen synthase kinase-3 beta OS=Homo sapiens OX=9606 GN=GSK3B PE=1 SV=2|Isoform 2 of Glycogen synthase kinase-3 beta OS=Homo sapiens OX=9606 GN=GSK3B	60159.0|54224.9|55513.5	5	6.83155	0.152019	0.320991	1.26474	0.235066	0.999039	-4.55004	CA	no_hit
CXorf38	Q8TB03	Uncharacterized protein CXorf38 OS=Homo sapiens OX=9606 GN=CXorf38 PE=1 SV=1	42616.1	7	6.80421	0.156608	0.213351	1.26451	0.235147	0.999039	-4.55009	CA	no_hit
USH1C	Q9Y6N9-5	Isoform 5 of Harmonin OS=Homo sapiens OX=9606 GN=USH1C	122613	11	7.27251	0.149388	0.0153346	1.26415	0.235271	0.999039	-4.55018	CA	no_hit
RASA1	E9PGC0|P20936|P20936-2|P20936-4	Ras GTPase-activating protein 1 OS=Homo sapiens OX=9606 GN=RASA1 PE=1 SV=1|Ras GTPase-activating protein 1 OS=Homo sapiens OX=9606 GN=RASA1 PE=1 SV=1|Isoform 2 of Ras GTPase-activating protein 1 OS=Homo sapiens OX=9606 GN=RASA1|Isoform 4 of Ras GTPase-activating protein 1 OS=Homo sapiens OX=9606 GN=RASA1	120890.0|135798.0|119442.0|120589.0	18	7.18025	0.218409	0.0659682	1.26394	0.235343	0.999039	-4.55023	CA	no_hit
FANCD2	Q9BXW9|Q9BXW9-1	Fanconi anemia group D2 protein OS=Homo sapiens OX=9606 GN=FANCD2 PE=1 SV=2|Isoform 1 of Fanconi anemia group D2 protein OS=Homo sapiens OX=9606 GN=FANCD2	195909.0|198107.0	21	7.3219	0.199973	0.0586087	1.26361	0.235456	0.999039	-4.5503	CA	no_hit
MEPCE	Q7L2J0	7SK snRNA methylphosphate capping enzyme OS=Homo sapiens OX=9606 GN=MEPCE PE=1 SV=1	83758.9	10	7.22659	-0.377584	-1.57549	-1.26244	0.235858	0.999039	-4.55057	CA	no_hit
PFKM	F8VTQ3|P08237	ATP-dependent 6-phosphofructokinase, muscle type (Fragment) OS=Homo sapiens OX=9606 GN=PFKM PE=1 SV=2|ATP-dependent 6-phosphofructokinase, muscle type OS=Homo sapiens OX=9606 GN=PFKM PE=1 SV=2|ATP-dependent 6-phosphofructokinase, muscle type OS=Homo sapiens OX=9606 GN=PFKM PE=1 SV=2	14035.5|99673.0	21	7.84922	0.180618	0.162009	1.2615	0.236184	0.999039	-4.55079	CA	no_hit
SPRYD7	Q5W111	SPRY domain-containing protein 7 OS=Homo sapiens OX=9606 GN=SPRYD7 PE=1 SV=2	24541.5	5	7.22262	-0.221171	0.126641	-1.26086	0.236406	0.999039	-4.55094	CA	no_hit
COMMD9	Q9P000	COMM domain-containing protein 9 OS=Homo sapiens OX=9606 GN=COMMD9 PE=1 SV=2	25379.8	7	7.3091	0.14709	0.280852	1.26012	0.23666	0.999039	-4.55112	CA	no_hit
DCUN1D5	Q9BTE7	DCN1-like protein 5 OS=Homo sapiens OX=9606 GN=DCUN1D5 PE=1 SV=1	34221.1	7	7.33624	0.171665	0.323367	1.2595	0.236874	0.999039	-4.55126	CA	no_hit
TMLHE	Q9NVH6|Q9NVH6-5|Q9NVH6-7|Q9NVH6-8	Trimethyllysine dioxygenase, mitochondrial OS=Homo sapiens OX=9606 GN=TMLHE PE=1 SV=1|Isoform 5 of Trimethyllysine dioxygenase, mitochondrial OS=Homo sapiens OX=9606 GN=TMLHE|Isoform 7 of Trimethyllysine dioxygenase, mitochondrial OS=Homo sapiens OX=9606 GN=TMLHE|Isoform 8 of Trimethyllysine dioxygenase, mitochondrial OS=Homo sapiens OX=9606 GN=TMLHE	56805.8|52022.4|47556.9|58423.8	7	6.78429	0.213029	0.0630895	1.25893	0.237073	0.999039	-4.55139	CA	no_hit
CCDC9	A0A2R8Y4Z8|Q9Y3X0	Coiled-coil domain-containing protein 9 OS=Homo sapiens OX=9606 GN=CCDC9 PE=1 SV=1|Coiled-coil domain-containing protein 9 OS=Homo sapiens OX=9606 GN=CCDC9 PE=1 SV=1	73652.4|67690.5	7	7.12543	-0.38831	-1.25387	-1.25833	0.237281	0.999039	-4.55153	CA	no_hit
TMF1	P82094	TATA element modulatory factor OS=Homo sapiens OX=9606 GN=TMF1 PE=1 SV=2	150963	21	7.32425	0.212968	0.0492105	1.25808	0.237367	0.999039	-4.55159	CA	no_hit
IFIT5	Q13325	Interferon-induced protein with tetratricopeptide repeats 5 OS=Homo sapiens OX=9606 GN=IFIT5 PE=1 SV=1	71173.9	9	7.43818	0.216743	-0.531905	1.25806	0.237372	0.999039	-4.5516	CA	no_hit
ME1	P48163	NADP-dependent malic enzyme OS=Homo sapiens OX=9606 GN=ME1 PE=1 SV=1	75326.5	19	8.35905	0.193539	0.389107	1.25769	0.237502	0.999039	-4.55168	CA	no_hit
HSP90AA1	P07900|P07900-2	Heat shock protein HSP 90-alpha OS=Homo sapiens OX=9606 GN=HSP90AA1 PE=1 SV=5|Isoform 2 of Heat shock protein HSP 90-alpha OS=Homo sapiens OX=9606 GN=HSP90AA1	109342.0|123919.0	27	9.26442	0.223416	0.252493	1.2565	0.237913	0.999039	-4.55196	CA	no_hit
PPIL3	B8ZZ77|Q9H2H8|Q9H2H8-2	Peptidyl-prolyl cis-trans isomerase OS=Homo sapiens OX=9606 GN=PPIL3 PE=1 SV=1|Peptidyl-prolyl cis-trans isomerase-like 3 OS=Homo sapiens OX=9606 GN=PPIL3 PE=1 SV=1|Isoform 2 of Peptidyl-prolyl cis-trans isomerase-like 3 OS=Homo sapiens OX=9606 GN=PPIL3	21506.5|22021.5|22493.9	4	7.15543	-0.323058	0.389782	-1.25602	0.238082	0.999039	-4.55207	CA	no_hit
DPP7	Q9UHL4	Dipeptidyl peptidase 2 OS=Homo sapiens OX=9606 GN=DPP7 PE=1 SV=3	57501.2	10	7.47417	0.156948	0.419842	1.2559	0.238124	0.999039	-4.5521	CA	no_hit
PHYH	B1ALH6|O14832	Phytanoyl-CoA dioxygenase, peroxisomal OS=Homo sapiens OX=9606 GN=PHYH PE=1 SV=1|Phytanoyl-CoA dioxygenase, peroxisomal OS=Homo sapiens OX=9606 GN=PHYH PE=1 SV=1	45364.1|46822.1	8	7.38799	0.183039	0.0650126	1.2551	0.238402	0.999039	-4.55229	CA	no_hit
NCAPD2	Q15021	Condensin complex subunit 1 OS=Homo sapiens OX=9606 GN=NCAPD2 PE=1 SV=3	183149	29	7.73933	0.174	0.00677465	1.25501	0.238434	0.999039	-4.55231	CA	no_hit
TJP1	G3V1L9|G5E9E7|H0Y3R8	Tight junction protein 1 (Zona occludens 1), isoform CRA_a OS=Homo sapiens OX=9606 GN=TJP1 PE=1 SV=1|Tight junction protein 1 (Zona occludens 1), isoform CRA_e OS=Homo sapiens OX=9606 GN=TJP1 PE=1 SV=1|Tight junction protein 1 (Zona occludens 1), isoform CRA_a OS=Homo sapiens OX=9606 GN=TJP1 PE=1 SV=1|Tight junction protein ZO-1 (Fragment) OS=Homo sapiens OX=9606 GN=TJP1 PE=1 SV=2	230231.0|221901.0|30144.1	57	7.94133	-0.33795	-0.904786	-1.25499	0.238439	0.999039	-4.55231	CA	no_hit
GRB7	Q14451|Q14451-3|Q14451-4	Growth factor receptor-bound protein 7 OS=Homo sapiens OX=9606 GN=GRB7 PE=1 SV=2|Isoform 3 of Growth factor receptor-bound protein 7 OS=Homo sapiens OX=9606 GN=GRB7|Isoform 4 of Growth factor receptor-bound protein 7 OS=Homo sapiens OX=9606 GN=GRB7	66887.0|69933.6|62766.9	3	6.3591	0.249143	0.0350349	1.25385	0.238838	0.999039	-4.55258	CA	no_hit
BAAT	Q14032	Bile acid-CoA:amino acid N-acyltransferase OS=Homo sapiens OX=9606 GN=BAAT PE=1 SV=1	51308.4	5	7.68388	0.229597	0.277094	1.25204	0.239468	0.999039	-4.553	CA	no_hit
SPATS2	Q86XZ4	Spermatogenesis-associated serine-rich protein 2 OS=Homo sapiens OX=9606 GN=SPATS2 PE=1 SV=1	73539	10	7.11979	-0.255278	-2.55345	-1.25084	0.239888	0.999039	-4.55328	CA	no_hit
HSP90AB4P	Q58FF6	Putative heat shock protein HSP 90-beta 4 OS=Homo sapiens OX=9606 GN=HSP90AB4P PE=5 SV=1	74369.4	2	7.43375	0.316503	0.0538866	1.25064	0.239958	0.999039	-4.55332	CA	no_hit
ITPRIP	Q8IWB1	Inositol 1,4,5-trisphosphate receptor-interacting protein OS=Homo sapiens OX=9606 GN=ITPRIP PE=1 SV=1	70232.8	6	7.15634	0.14554	0.0496947	1.25034	0.240063	0.999039	-4.55339	CA	no_hit
NUMB	P49757|P49757-3	Protein numb homolog OS=Homo sapiens OX=9606 GN=NUMB PE=1 SV=2|Isoform 3 of Protein numb homolog OS=Homo sapiens OX=9606 GN=NUMB	82395.1|80110.7	9	7.42835	0.16509	-0.312	1.25011	0.240143	0.999039	-4.55345	CA	no_hit
RAB32	Q13637	Ras-related protein Rab-32 OS=Homo sapiens OX=9606 GN=RAB32 PE=1 SV=3	30077.1	10	7.56679	0.166575	0.377396	1.24974	0.240272	0.999039	-4.55353	CA	no_hit
ATG7	O95352|O95352-2|O95352-3	Ubiquitin-like modifier-activating enzyme ATG7 OS=Homo sapiens OX=9606 GN=ATG7 PE=1 SV=1|Ubiquitin-like modifier-activating enzyme ATG7 OS=Homo sapiens OX=9606 GN=ATG7 PE=1 SV=1|Isoform 2 of Ubiquitin-like modifier-activating enzyme ATG7 OS=Homo sapiens OX=9606 GN=ATG7|Isoform 3 of Ubiquitin-like modifier-activating enzyme ATG7 OS=Homo sapiens OX=9606 GN=ATG7	90305.4|86627.5|79638.9	15	7.43663	0.169361	0.245582	1.24928	0.240434	0.999039	-4.55364	CA	no_hit
RABGAP1L	Q5R372|Q5R372-3|Q5R372-4|Q5R372-2	Rab GTPase-activating protein 1-like OS=Homo sapiens OX=9606 GN=RABGAP1L PE=1 SV=1|Isoform 3 of Rab GTPase-activating protein 1-like OS=Homo sapiens OX=9606 GN=RABGAP1L|Isoform 4 of Rab GTPase-activating protein 1-like OS=Homo sapiens OX=9606 GN=RABGAP1L|Rab GTPase-activating protein 1-like OS=Homo sapiens OX=9606 GN=RABGAP1L PE=1 SV=1|Isoform 2 of Rab GTPase-activating protein 1-like OS=Homo sap…	109793.0|111281.0|108120.0|80812.4	6	6.61625	0.170815	0.103207	1.24888	0.240572	0.999039	-4.55373	CA	no_hit
CNN2	B4DDF4|B4DUT8|Q99439	Calponin OS=Homo sapiens OX=9606 GN=CNN2 PE=1 SV=1|Calponin OS=Homo sapiens OX=9606 GN=CNN2 PE=1 SV=1|Calponin-2 OS=Homo sapiens OX=9606 GN=CNN2 PE=1 SV=4	39078.9|42765.0|40462.8	10	8.06432	-0.2893	0.212652	-1.24868	0.240642	0.999039	-4.55378	CA	no_hit
SELENBP1	Q13228|Q13228-4	Methanethiol oxidase OS=Homo sapiens OX=9606 GN=SELENBP1 PE=1 SV=2|Isoform 4 of Methanethiol oxidase OS=Homo sapiens OX=9606 GN=SELENBP1	61445.6|65974.9	16	7.63143	0.167376	0.524871	1.24761	0.241018	0.999039	-4.55403	CA	no_hit
OSTF1	Q92882	Osteoclast-stimulating factor 1 OS=Homo sapiens OX=9606 GN=OSTF1 PE=1 SV=2	29114.5	3	7.24096	-0.351553	0.963525	-1.24753	0.241045	0.999039	-4.55404	CA	no_hit
MSH6	P52701	DNA mismatch repair protein Msh6 OS=Homo sapiens OX=9606 GN=MSH6 PE=1 SV=2	185238	43	7.8673	0.224191	-0.25697	1.24667	0.241347	0.999039	-4.55424	CA	no_hit
NIF3L1	Q9GZT8|Q9GZT8-2	NIF3-like protein 1 OS=Homo sapiens OX=9606 GN=NIF3L1 PE=1 SV=2|Isoform 2 of NIF3-like protein 1 OS=Homo sapiens OX=9606 GN=NIF3L1	47512.2|44415.6	12	7.61346	0.164922	0.517193	1.24665	0.241356	0.999039	-4.55425	CA	no_hit
TXNRD1	A0A087WSW9|A0A087WSY9|Q16881|Q16881-3|Q16881-4|Q16881-7	Thioredoxin reductase 1, cytoplasmic OS=Homo sapiens OX=9606 GN=TXNRD1 PE=1 SV=1|Thioredoxin reductase 1, cytoplasmic OS=Homo sapiens OX=9606 GN=TXNRD1 PE=1 SV=2|Thioredoxin reductase 1, cytoplasmic OS=Homo sapiens OX=9606 GN=TXNRD1 PE=1 SV=3|Isoform 3 of Thioredoxin reductase 1, cytoplasmic OS=Homo sapiens OX=9606 GN=TXNRD1|Isoform 4 of Thioredoxin reductase 1, cytoplasmic OS=Homo sapiens OX=960…	72646.2|85978.4|86129.3|79158.8|73044.2|60709.4	27	8.95339	0.16658	0.259882	1.24628	0.241484	0.999039	-4.55434	CA	no_hit
EXOSC2	A3KFL2|Q13868|Q13868-2	Exosome complex component RRP4 OS=Homo sapiens OX=9606 GN=EXOSC2 PE=1 SV=1|Exosome complex component RRP4 OS=Homo sapiens OX=9606 GN=EXOSC2 PE=1 SV=2|Isoform 2 of Exosome complex component RRP4 OS=Homo sapiens OX=9606 GN=EXOSC2	37069.1|37863.5|34512.7	8	7.50797	0.263778	-0.843274	1.24619	0.241516	0.999039	-4.55436	CA	no_hit
EIF4E2	B8ZZ50|B9A044|C9JEL3|O60573|O60573-2	Eukaryotic translation initiation factor 4E type 2 OS=Homo sapiens OX=9606 GN=EIF4E2 PE=1 SV=1|Eukaryotic translation initiation factor 4E type 2 OS=Homo sapiens OX=9606 GN=EIF4E2 PE=1 SV=1|Eukaryotic translation initiation factor 4E type 2 (Fragment) OS=Homo sapiens OX=9606 GN=EIF4E2 PE=1 SV=1|Eukaryotic translation initiation factor 4E type 2 OS=Homo sapiens OX=9606 GN=EIF4E2 PE=1 SV=1|Isoform …	32487.9|32141.8|29264.3|33934.0|32599.1	7	7.31888	-0.275298	0.277151	-1.24616	0.241528	0.999039	-4.55436	CA	no_hit
TACC2	O95359|O95359-1|O95359-3|O95359-5|Q4VXL8|Q4VXL4	Transforming acidic coiled-coil-containing protein 2 OS=Homo sapiens OX=9606 GN=TACC2 PE=1 SV=3|Isoform 1 of Transforming acidic coiled-coil-containing protein 2 OS=Homo sapiens OX=9606 GN=TACC2|Isoform 3 of Transforming acidic coiled-coil-containing protein 2 OS=Homo sapiens OX=9606 GN=TACC2|Isoform 5 of Transforming acidic coiled-coil-containing protein 2 OS=Homo sapiens OX=9606 GN=TACC2|Transf…	359393.0|138660.0|349755.0|146512.0|140058.0|81956.2	17	7.63812	-0.298959	0.347634	-1.24515	0.241882	0.999039	-4.5546	CA	no_hit
TUFT1	A6PVU8|Q9NNX1|Q9NNX1-2|Q9NNX1-3	Tuftelin OS=Homo sapiens OX=9606 GN=TUFT1 PE=1 SV=1|Tuftelin OS=Homo sapiens OX=9606 GN=TUFT1 PE=1 SV=1|Isoform 2 of Tuftelin OS=Homo sapiens OX=9606 GN=TUFT1|Isoform 3 of Tuftelin OS=Homo sapiens OX=9606 GN=TUFT1|Tuftelin OS=Homo sapiens OX=9606 GN=TUFT1 PE=1 SV=1|Isoform 2 of Tuftelin OS=Homo sapiens OX=9606 GN=TUFT1|Isoform 3 of Tuftelin OS=Homo sapiens OX=9606 GN=TUFT1	45836.5|53039.5|50018.8|45795.6	7	7.04254	0.235648	0.489616	1.24474	0.242026	0.999039	-4.55469	CA	no_hit
COPB1	P53618	Coatomer subunit beta OS=Homo sapiens OX=9606 GN=COPB1 PE=1 SV=3	129204	37	8.4451	0.211277	0.000878446	1.24397	0.242298	0.999039	-4.55487	CA	no_hit
BCAT2	O15382	Branched-chain-amino-acid aminotransferase, mitochondrial OS=Homo sapiens OX=9606 GN=BCAT2 PE=1 SV=2	50133.9	18	8.1678	0.180248	0.213617	1.24396	0.242302	0.999039	-4.55487	CA	no_hit
TMPO	H0YJH7|P42166|P42167|P42167-2	Lamina-associated polypeptide 2, isoforms beta/gamma (Fragment) OS=Homo sapiens OX=9606 GN=TMPO PE=1 SV=1|Lamina-associated polypeptide 2, isoform alpha OS=Homo sapiens OX=9606 GN=TMPO PE=1 SV=2|Lamina-associated polypeptide 2, isoforms beta/gamma OS=Homo sapiens OX=9606 GN=TMPO PE=1 SV=2|Isoform Gamma of Lamina-associated polypeptide 2, isoforms beta/gamma OS=Homo sapiens OX=9606 GN=TMPO|Lamina-…	34512.3|92443.0|61952.1|48505.9	38	8.25614	-0.147922	0.0145349	-1.24384	0.242345	0.999039	-4.5549	CA	no_hit
TCEAL4	A2RQR6|Q96EI5|Q96EI5-2	Transcription elongation factor A (SII)-like 4 variant 1 OS=Homo sapiens OX=9606 GN=TCEAL4 PE=1 SV=1|Transcription elongation factor A protein-like 4 OS=Homo sapiens OX=9606 GN=TCEAL4 PE=1 SV=2|Isoform 2 of Transcription elongation factor A protein-like 4 OS=Homo sapiens OX=9606 GN=TCEAL4	28941.6|32959.5|52150.8	3	6.95301	-0.421104	0.741769	-1.2435	0.242464	0.999039	-4.55498	CA	no_hit
PRMT1	Q99873|Q99873-2|Q99873-3	Protein arginine N-methyltransferase 1 OS=Homo sapiens OX=9606 GN=PRMT1 PE=1 SV=3|Isoform 2 of Protein arginine N-methyltransferase 1 OS=Homo sapiens OX=9606 GN=PRMT1|Isoform 3 of Protein arginine N-methyltransferase 1 OS=Homo sapiens OX=9606 GN=PRMT1	51274.8|48686.6|49362.8	20	8.63199	0.183627	0.226989	1.24178	0.24307	0.999039	-4.55538	CA	no_hit
HMG20A	Q9NP66	High mobility group protein 20A OS=Homo sapiens OX=9606 GN=HMG20A PE=1 SV=1	47115.8	5	7.05934	-0.467339	-1.13818	-1.24143	0.243196	0.999039	-4.55546	CA	no_hit
TRAM1	G3XAN4|Q15629|Q15629-2	Translocating chain-associated membrane protein 1 OS=Homo sapiens OX=9606 GN=TRAM1 PE=1 SV=1|Translocating chain-associated membrane protein 1 OS=Homo sapiens OX=9606 GN=TRAM1 PE=1 SV=3|Isoform 2 of Translocating chain-associated membrane protein 1 OS=Homo sapiens OX=9606 GN=TRAM1	39916.1|51124.2|46767.8	5	7.921	-0.373572	-0.0405021	-1.24105	0.24333	0.999039	-4.55555	CA	no_hit
PYGL	P06737|P06737-2	Glycogen phosphorylase, liver form OS=Homo sapiens OX=9606 GN=PYGL PE=1 SV=4|Isoform 2 of Glycogen phosphorylase, liver form OS=Homo sapiens OX=9606 GN=PYGL	117260.0|113191.0	30	8.0227	0.242069	-0.105264	1.24039	0.243564	0.999039	-4.5557	CA	no_hit
CCDC12	J3KR35|Q8WUD4	Coiled-coil domain containing 12, isoform CRA_a OS=Homo sapiens OX=9606 GN=CCDC12 PE=1 SV=1|Coiled-coil domain-containing protein 12 OS=Homo sapiens OX=9606 GN=CCDC12 PE=1 SV=1	28151.1|26223.0	5	7.02712	-0.309626	0.201454	-1.23971	0.243805	0.999039	-4.55586	CA	no_hit
OPA1	O60313-2	Isoform 2 of Dynamin-like 120 kDa protein, mitochondrial OS=Homo sapiens OX=9606 GN=OPA1	142848	33	7.82182	0.22256	0.010855	1.23928	0.243956	0.999039	-4.55596	CA	no_hit
EPHX2	E5RFU2|P34913	Bifunctional epoxide hydrolase 2 OS=Homo sapiens OX=9606 GN=EPHX2 PE=1 SV=1|Bifunctional epoxide hydrolase 2 OS=Homo sapiens OX=9606 GN=EPHX2 PE=1 SV=2|Bifunctional epoxide hydrolase 2 OS=Homo sapiens OX=9606 GN=EPHX2 PE=1 SV=2	69787.1|73659.0	7	6.87751	0.165334	0.250072	1.23886	0.244106	0.999039	-4.55606	CA	no_hit
PTBP1	A6NLN1|P26599-3|P26599|P26599-2	Polypyrimidine tract binding protein 1, isoform CRA_b OS=Homo sapiens OX=9606 GN=PTBP1 PE=1 SV=4|Isoform 3 of Polypyrimidine tract-binding protein 1 OS=Homo sapiens OX=9606 GN=PTBP1|Polypyrimidine tract-binding protein 1 OS=Homo sapiens OX=9606 GN=PTBP1 PE=1 SV=1|Isoform 2 of Polypyrimidine tract-binding protein 1 OS=Homo sapiens OX=9606 GN=PTBP1|Isoform 3 of Polypyrimidine tract-binding protein …	66324.0|69805.8|67395.5|69210.4	8	8.37841	0.196658	-0.986563	1.23752	0.244579	0.999039	-4.55636	CA	no_hit
NOCT	Q9UK39	Nocturnin OS=Homo sapiens OX=9606 GN=NOCT PE=1 SV=2	53640.7	5	6.7702	0.148715	0.10909	1.23743	0.244614	0.999039	-4.55639	CA	no_hit
SYNM	A0A075B7B1|O15061	Desmuslin, isoform CRA_a OS=Homo sapiens OX=9606 GN=SYNM PE=1 SV=1|Synemin OS=Homo sapiens OX=9606 GN=SYNM PE=1 SV=2	158863.0|193691.0	20	7.19372	-0.40158	-2.11384	-1.23726	0.244672	0.999039	-4.55642	CA	no_hit
RCC2	Q9P258	Protein RCC2 OS=Homo sapiens OX=9606 GN=RCC2 PE=1 SV=2	66829.3	19	8.1919	0.14936	-0.0756266	1.23594	0.245144	0.999039	-4.55673	CA	no_hit
UGP2	A0A087WYS1|E7EUC7|Q16851	UTP--glucose-1-phosphate uridylyltransferase OS=Homo sapiens OX=9606 GN=UGP2 PE=1 SV=1|UTP--glucose-1-phosphate uridylyltransferase OS=Homo sapiens OX=9606 GN=UGP2 PE=1 SV=1|UTP--glucose-1-phosphate uridylyltransferase OS=Homo sapiens OX=9606 GN=UGP2 PE=1 SV=5|UTP--glucose-1-phosphate uridylyltransferase OS=Homo sapiens OX=9606 GN=UGP2 PE=1 SV=5	69575.3|70717.0|69548.3	24	8.57607	0.172741	0.591418	1.23574	0.245215	0.999039	-4.55678	CA	no_hit
GGACT	Q9BVM4	Gamma-glutamylaminecyclotransferase OS=Homo sapiens OX=9606 GN=GGACT PE=1 SV=2	17736	2	6.4127	-0.408461	0.906495	-1.23544	0.245319	0.999039	-4.55684	CA	no_hit
LENG9	A0A087WVD1|Q96B70	Leukocyte receptor cluster member 9 OS=Homo sapiens OX=9606 GN=LENG9 PE=1 SV=1|Leukocyte receptor cluster member 9 OS=Homo sapiens OX=9606 GN=LENG9 PE=2 SV=2	54347.6|56859.8	3	6.51441	-0.309849	-0.261744	-1.23543	0.245323	0.999039	-4.55685	CA	no_hit
FLNB	O75369-8	Isoform 8 of Filamin-B OS=Homo sapiens OX=9606 GN=FLNB	337470	121	8.85342	0.213501	0.118743	1.23495	0.245494	0.999039	-4.55696	CA	no_hit
RDX	A0A2R8Y5S7|E9PNV3|P35241|P35241-5	Radixin OS=Homo sapiens OX=9606 GN=RDX PE=1 SV=1|Radixin (Fragment) OS=Homo sapiens OX=9606 GN=RDX PE=1 SV=1|Radixin OS=Homo sapiens OX=9606 GN=RDX PE=1 SV=1|Isoform 5 of Radixin OS=Homo sapiens OX=9606 GN=RDX|Radixin OS=Homo sapiens OX=9606 GN=RDX PE=1 SV=1|Radixin OS=Homo sapiens OX=9606 GN=RDX PE=1 SV=1|Isoform 5 of Radixin OS=Homo sapiens OX=9606 GN=RDX	89788.7|21587.9|89017.3|92166.0	24	8.39893	0.292984	-0.145129	1.23477	0.245559	0.999039	-4.557	CA	no_hit
PPM1H	Q9ULR3	Protein phosphatase 1H OS=Homo sapiens OX=9606 GN=PPM1H PE=1 SV=2	64531	3	6.51067	0.230489	0.447617	1.23411	0.245794	0.999039	-4.55715	CA	no_hit
TBCK	Q8TEA7|Q8TEA7-2|Q8TEA7-3	TBC domain-containing protein kinase-like protein OS=Homo sapiens OX=9606 GN=TBCK PE=1 SV=4|Isoform 2 of TBC domain-containing protein kinase-like protein OS=Homo sapiens OX=9606 GN=TBCK|Isoform 3 of TBC domain-containing protein kinase-like protein OS=Homo sapiens OX=9606 GN=TBCK	118715.0|113208.0|110434.0	4	6.8031	0.258581	-0.998635	1.23158	0.246698	0.999039	-4.55774	CA	no_hit
STX12	Q86Y82|B1AJQ6	Syntaxin-12 OS=Homo sapiens OX=9606 GN=STX12 PE=1 SV=1|Syntaxin-12 (Fragment) OS=Homo sapiens OX=9606 GN=STX12 PE=1 SV=2|Syntaxin-12 OS=Homo sapiens OX=9606 GN=STX12 PE=1 SV=1	36603.6|27717.5	6	7.34927	0.191528	0.100328	1.2312	0.246833	0.999039	-4.55782	CA	no_hit
FDPS	P14324|P14324-2	Farnesyl pyrophosphate synthase OS=Homo sapiens OX=9606 GN=FDPS PE=1 SV=4|Isoform 2 of Farnesyl pyrophosphate synthase OS=Homo sapiens OX=9606 GN=FDPS	55450.4|47541.3	9	8.24486	0.205141	0.705222	1.22961	0.247404	0.999039	-4.55819	CA	no_hit
KNOP1	Q1ED39	Lysine-rich nucleolar protein 1 OS=Homo sapiens OX=9606 GN=KNOP1 PE=1 SV=1	76064.9	10	7.27993	-0.496273	-3.24765	-1.22932	0.247507	0.999039	-4.55826	CA	no_hit
UGGT1	Q9NYU2|Q9NYU2-2	UDP-glucose:glycoprotein glucosyltransferase 1 OS=Homo sapiens OX=9606 GN=UGGT1 PE=1 SV=3|Isoform 2 of UDP-glucose:glycoprotein glucosyltransferase 1 OS=Homo sapiens OX=9606 GN=UGGT1	208848.0|205858.0	43	8.13681	0.202697	0.201384	1.22813	0.247935	0.999039	-4.55853	CA	no_hit
GNB2	P62879	Guanine nucleotide-binding protein G(I)/G(S)/G(T) subunit beta-2 OS=Homo sapiens OX=9606 GN=GNB2 PE=1 SV=3	40482	3	7.82665	0.181521	-0.120895	1.22782	0.248047	0.999039	-4.5586	CA	no_hit
UBXN2B	Q14CS0	UBX domain-containing protein 2B OS=Homo sapiens OX=9606 GN=UBXN2B PE=1 SV=1	42948	3	6.61508	-0.328028	0.608277	-1.22755	0.248144	0.999039	-4.55867	CA	no_hit
CD46	P15529-15|P15529-2|P15529-3|P15529-4|P15529-5|P15529-6|P15529-7	Isoform K of Membrane cofactor protein OS=Homo sapiens OX=9606 GN=CD46|Isoform B of Membrane cofactor protein OS=Homo sapiens OX=9606 GN=CD46|Isoform D of Membrane cofactor protein OS=Homo sapiens OX=9606 GN=CD46|Isoform F of Membrane cofactor protein OS=Homo sapiens OX=9606 GN=CD46|Isoform H of Membrane cofactor protein OS=Homo sapiens OX=9606 GN=CD46|Isoform J of Membrane cofactor protein OS=Ho…	47919.0|54057.3|52254.2|50571.4|52199.3|50396.2|48713.4	8	7.79777	-0.437119	0.620512	-1.22633	0.248582	0.999039	-4.55895	CA	no_hit
PML	P29590|P29590-2|P29590-3|P29590-4|P29590-5|P29590-8|P29590-9	Protein PML OS=Homo sapiens OX=9606 GN=PML PE=1 SV=3|Isoform PML-5 of Protein PML OS=Homo sapiens OX=9606 GN=PML|Isoform PML-8 of Protein PML OS=Homo sapiens OX=9606 GN=PML|Isoform PML-6 of Protein PML OS=Homo sapiens OX=9606 GN=PML|Isoform PML-4 of Protein PML OS=Homo sapiens OX=9606 GN=PML|Isoform PML-2 of Protein PML OS=Homo sapiens OX=9606 GN=PML|Isoform PML-3 of Protein PML OS=Homo sapiens O…	108269.0|75299.2|98226.6|69838.4|78154.3|98705.8|78498.9	9	7.13565	-0.325258	-0.250105	-1.2261	0.248664	0.999039	-4.559	CA	no_hit
ENOSF1	A0A3F2YNX7|Q7L5Y1|Q7L5Y1-4|Q7L5Y1-5|J3QL81|Q7L5Y1-2|Q7L5Y1-6	Mitochondrial enolase superfamily member 1 OS=Homo sapiens OX=9606 GN=ENOSF1 PE=1 SV=1|Mitochondrial enolase superfamily member 1 OS=Homo sapiens OX=9606 GN=ENOSF1 PE=1 SV=1|Isoform 4 of Mitochondrial enolase superfamily member 1 OS=Homo sapiens OX=9606 GN=ENOSF1|Isoform 5 of Mitochondrial enolase superfamily member 1 OS=Homo sapiens OX=9606 GN=ENOSF1|Mitochondrial enolase superfamily member 1 OS…	63390.4|60116.2|60498.9|62795.8|49190.1|50940.6|36231.3	3	6.67185	0.198795	0.152144	1.22602	0.248694	0.999039	-4.55902	CA	no_hit
THG1L	Q9NWX6	Probable tRNA(His) guanylyltransferase OS=Homo sapiens OX=9606 GN=THG1L PE=1 SV=2	41538.9	5	7.16136	0.202439	0.227354	1.22355	0.249585	0.999039	-4.55959	CA	no_hit
TBRG4	Q969Z0	FAST kinase domain-containing protein 4 OS=Homo sapiens OX=9606 GN=TBRG4 PE=1 SV=1	82709.5	15	8.35985	0.240688	-0.0506939	1.22208	0.250113	0.999039	-4.55992	CA	no_hit
NFKBIB	Q15653|Q15653-2|G5E9C2|I3L4X3	NF-kappa-B inhibitor beta OS=Homo sapiens OX=9606 GN=NFKBIB PE=1 SV=2|Isoform 2 of NF-kappa-B inhibitor beta OS=Homo sapiens OX=9606 GN=NFKBIB|NF-kappa-B inhibitor beta OS=Homo sapiens OX=9606 GN=NFKBIB PE=1 SV=2|NF-kappa-B inhibitor beta (Fragment) OS=Homo sapiens OX=9606 GN=NFKBIB PE=1 SV=8|NF-kappa-B inhibitor beta OS=Homo sapiens OX=9606 GN=NFKBIB PE=1 SV=2|Isoform 2 of NF-kappa-B inhibitor b…	40580.4|38037.0|31542.1|27213.9	4	7.21861	-0.248219	0.45712	-1.22163	0.250278	0.999039	-4.56003	CA	no_hit
STRN4	Q9NRL3|Q9NRL3-3	Striatin-4 OS=Homo sapiens OX=9606 GN=STRN4 PE=1 SV=2|Isoform 3 of Striatin-4 OS=Homo sapiens OX=9606 GN=STRN4	92847.2|93516.5	12	7.40895	-0.172517	0.125257	-1.2198	0.250941	0.999039	-4.56045	CA	no_hit
ELMO1	Q92556	Engulfment and cell motility protein 1 OS=Homo sapiens OX=9606 GN=ELMO1 PE=1 SV=2	100336	12	7.27163	0.199331	-0.201491	1.21934	0.251106	0.999039	-4.56055	CA	no_hit
DHRS3	O75911	Short-chain dehydrogenase/reductase 3 OS=Homo sapiens OX=9606 GN=DHRS3 PE=1 SV=2	38793.1	9	7.82559	0.175067	-0.24542	1.21843	0.251436	0.999039	-4.56076	CA	no_hit
B3GNT2	Q9NY97|Q9NY97-2	N-acetyllactosaminide beta-1,3-N-acetylglucosaminyltransferase 2 OS=Homo sapiens OX=9606 GN=B3GNT2 PE=1 SV=2|Isoform 2 of N-acetyllactosaminide beta-1,3-N-acetylglucosaminyltransferase 2 OS=Homo sapiens OX=9606 GN=B3GNT2	55517.9|54676.3	2	6.1266	-0.210659	0.473942	-1.21798	0.251602	0.999039	-4.56086	CA	no_hit
BAG2	O95816	BAG family molecular chaperone regulator 2 OS=Homo sapiens OX=9606 GN=BAG2 PE=1 SV=1	28187.2	14	7.78886	-0.260461	-0.436322	-1.21752	0.25177	0.999039	-4.56097	CA	no_hit
GLOD4	F6TLX2|Q9HC38-2	Glyoxalase domain-containing protein 4 OS=Homo sapiens OX=9606 GN=GLOD4 PE=1 SV=1|Isoform 2 of Glyoxalase domain-containing protein 4 OS=Homo sapiens OX=9606 GN=GLOD4	64362.1|41158.9	15	8.22345	0.18039	0.590524	1.21746	0.251791	0.999039	-4.56098	CA	no_hit
NUP153	P49790	Nuclear pore complex protein Nup153 OS=Homo sapiens OX=9606 GN=NUP153 PE=1 SV=2	184948	26	8.04402	-0.362008	-0.546882	-1.21745	0.251793	0.999039	-4.56098	CA	no_hit
CKB	P12277	Creatine kinase B-type OS=Homo sapiens OX=9606 GN=CKB PE=1 SV=1	49290.8	6	6.68443	0.279974	0.770187	1.21729	0.251852	0.999039	-4.56102	CA	no_hit
ABL2	P42684|P42684-2|P42684-3|P42684-6	Tyrosine-protein kinase ABL2 OS=Homo sapiens OX=9606 GN=ABL2 PE=1 SV=1|Isoform 2 of Tyrosine-protein kinase ABL2 OS=Homo sapiens OX=9606 GN=ABL2|Isoform 3 of Tyrosine-protein kinase ABL2 OS=Homo sapiens OX=9606 GN=ABL2|Isoform 6 of Tyrosine-protein kinase ABL2 OS=Homo sapiens OX=9606 GN=ABL2|Tyrosine-protein kinase ABL2 OS=Homo sapiens OX=9606 GN=ABL2 PE=1 SV=1|Isoform 6 of Tyrosine-protein kinas…	152105.0|148134.0|150618.0|149621.0	3	6.70641	-0.259383	-0.273877	-1.21724	0.25187	0.999039	-4.56103	CA	no_hit
EPHB2	P29323|P29323-2|P29323-3	Ephrin type-B receptor 2 OS=Homo sapiens OX=9606 GN=EPHB2 PE=1 SV=5|Isoform 2 of Ephrin type-B receptor 2 OS=Homo sapiens OX=9606 GN=EPHB2|Isoform 3 of Ephrin type-B receptor 2 OS=Homo sapiens OX=9606 GN=EPHB2	134034.0|122846.0|123002.0	15	7.28404	0.159171	0.290192	1.21649	0.252144	0.999039	-4.5612	CA	no_hit
RAI1	A0A1W2PQJ7|Q7Z5J4|Q7Z5J4-2	Retinoic acid-induced protein 1 OS=Homo sapiens OX=9606 GN=RAI1 PE=1 SV=1|Retinoic acid-induced protein 1 OS=Homo sapiens OX=9606 GN=RAI1 PE=1 SV=2|Isoform 2 of Retinoic acid-induced protein 1 OS=Homo sapiens OX=9606 GN=RAI1	222363.0|247563.0|238613.0	9	6.75756	-0.357851	-2.20852	-1.21569	0.252433	0.999039	-4.56139	CA	no_hit
TTC14	Q96N46|Q96N46-2	Tetratricopeptide repeat protein 14 OS=Homo sapiens OX=9606 GN=TTC14 PE=1 SV=1|Isoform 2 of Tetratricopeptide repeat protein 14 OS=Homo sapiens OX=9606 GN=TTC14	110681.0|91272.3	3	6.02698	0.158334	0.484596	1.21562	0.252462	0.999039	-4.5614	CA	no_hit
EZR	E7EQR4|P15311	Ezrin OS=Homo sapiens OX=9606 GN=EZR PE=1 SV=3|Ezrin OS=Homo sapiens OX=9606 GN=EZR PE=1 SV=4|Ezrin OS=Homo sapiens OX=9606 GN=EZR PE=1 SV=4	85869.9|86215.2	35	9.08573	0.295991	-0.00934471	1.21547	0.252515	0.999039	-4.56144	CA	no_hit
AHCY	P23526	Adenosylhomocysteinase OS=Homo sapiens OX=9606 GN=AHCY PE=1 SV=4	57077.4	21	8.81151	0.169313	0.366672	1.21526	0.252592	0.999039	-4.56149	CA	no_hit
PURA	Q00577	Transcriptional activator protein Pur-alpha OS=Homo sapiens OX=9606 GN=PURA PE=1 SV=2	41087.6	3	7.22591	0.314088	-2.62497	1.21516	0.252626	0.999039	-4.56151	CA	no_hit
GNPAT	O15228	Dihydroxyacetone phosphate acyltransferase OS=Homo sapiens OX=9606 GN=GNPAT PE=1 SV=1	92842.4	23	7.78025	0.22111	0.0989168	1.21454	0.252855	0.999039	-4.56165	CA	no_hit
IGF2BP3	O00425	Insulin-like growth factor 2 mRNA-binding protein 3 OS=Homo sapiens OX=9606 GN=IGF2BP3 PE=1 SV=2	78305.4	15	7.71747	0.505435	-2.75097	1.21411	0.25301	0.999039	-4.56175	CA	no_hit
ILF2	Q12905	Interleukin enhancer-binding factor 2 OS=Homo sapiens OX=9606 GN=ILF2 PE=1 SV=2	48434.8	15	8.30512	0.28952	-2.31867	1.21379	0.253128	0.999039	-4.56182	CA	no_hit
EHMT2	A0A0G2JIS2|Q96KQ7|Q96KQ7-2	Histone-lysine N-methyltransferase EHMT2 OS=Homo sapiens OX=9606 GN=EHMT2 PE=1 SV=1|Histone-lysine N-methyltransferase EHMT2 OS=Homo sapiens OX=9606 GN=EHMT2 PE=1 SV=3|Isoform 2 of Histone-lysine N-methyltransferase EHMT2 OS=Homo sapiens OX=9606 GN=EHMT2	147772.0|151109.0|147759.0	8	6.77443	-0.371548	-1.5114	-1.21296	0.25343	0.999039	-4.56201	CA	no_hit
BAD	Q92934	Bcl2-associated agonist of cell death OS=Homo sapiens OX=9606 GN=BAD PE=1 SV=3	19597.5	2	6.79742	-0.643687	1.28504	-1.21217	0.253719	0.999039	-4.56219	CA	no_hit
YARS1	P54577	Tyrosine--tRNA ligase, cytoplasmic OS=Homo sapiens OX=9606 GN=YARS1 PE=1 SV=4	78004.9	28	8.34368	0.172423	0.180019	1.2121	0.253744	0.999039	-4.56221	CA	no_hit
TRIP11	Q15643	Thyroid receptor-interacting protein 11 OS=Homo sapiens OX=9606 GN=TRIP11 PE=1 SV=3	284409	41	7.37362	0.207065	0.20165	1.21159	0.253931	0.999039	-4.56232	CA	no_hit
ZNRD2	H0YEB6|O60232	Protein ZNRD2 (Fragment) OS=Homo sapiens OX=9606 GN=ZNRD2 PE=1 SV=1|Protein ZNRD2 OS=Homo sapiens OX=9606 GN=ZNRD2 PE=1 SV=1	23184.8|23742.1	3	7.04792	-0.452866	0.792799	-1.21145	0.253985	0.999039	-4.56236	CA	no_hit
SND1	Q7KZF4	Staphylococcal nuclease domain-containing protein 1 OS=Homo sapiens OX=9606 GN=SND1 PE=1 SV=1	120262	46	8.56511	0.244588	-0.506232	1.21097	0.254161	0.999039	-4.56247	CA	no_hit
ANAPC5	F5H0F9|Q9UJX4-2|Q9UJX4	Anaphase-promoting complex subunit 5 OS=Homo sapiens OX=9606 GN=ANAPC5 PE=1 SV=1|Isoform 2 of Anaphase-promoting complex subunit 5 OS=Homo sapiens OX=9606 GN=ANAPC5|Anaphase-promoting complex subunit 5 OS=Homo sapiens OX=9606 GN=ANAPC5 PE=1 SV=1|Anaphase-promoting complex subunit 5 OS=Homo sapiens OX=9606 GN=ANAPC5 PE=1 SV=2	97995.6|28953.1|99396.4	19	7.28772	0.296168	-0.321325	1.21089	0.254187	0.999039	-4.56248	CA	no_hit
ZNF598	Q86UK7|Q86UK7-2|Q86UK7-3	E3 ubiquitin-protein ligase ZNF598 OS=Homo sapiens OX=9606 GN=ZNF598 PE=1 SV=1|Isoform 2 of E3 ubiquitin-protein ligase ZNF598 OS=Homo sapiens OX=9606 GN=ZNF598|Isoform 3 of E3 ubiquitin-protein ligase ZNF598 OS=Homo sapiens OX=9606 GN=ZNF598	113785.0|112593.0|113216.0	15	7.44956	-0.221685	-0.759829	-1.20989	0.254554	0.999039	-4.56271	CA	no_hit
RWDD4	D6R9C7|K4DI92|Q6NW29	RWD domain-containing protein 4 (Fragment) OS=Homo sapiens OX=9606 GN=RWDD4 PE=1 SV=1|RWD domain containing 4A OS=Homo sapiens OX=9606 GN=RWDD4 PE=1 SV=1|RWD domain-containing protein 4 OS=Homo sapiens OX=9606 GN=RWDD4 PE=1 SV=3|RWD domain containing 4A OS=Homo sapiens OX=9606 GN=RWDD4 PE=1 SV=1|RWD domain-containing protein 4 OS=Homo sapiens OX=9606 GN=RWDD4 PE=1 SV=3	5324.67|26576.3|26713.3	4	6.81126	-0.422935	0.851801	-1.20941	0.254731	0.999039	-4.56282	CA	no_hit
CLN5	A0A024R644|A0A1B0GWI2|O75503	Ceroid-lipofuscinosis neuronal protein 5 OS=Homo sapiens OX=9606 GN=CLN5 PE=1 SV=1|Ceroid-lipofuscinosis neuronal protein 5 (Fragment) OS=Homo sapiens OX=9606 GN=CLN5 PE=1 SV=1|Ceroid-lipofuscinosis neuronal protein 5 OS=Homo sapiens OX=9606 GN=CLN5 PE=1 SV=2	53457.8|42567.2|48561.3	3	6.60023	-0.220389	0.510565	-1.2086	0.25503	0.999039	-4.56301	CA	no_hit
FARSB	Q9NSD9	Phenylalanine--tRNA ligase beta subunit OS=Homo sapiens OX=9606 GN=FARSB PE=1 SV=3	80694.3	29	8.39252	0.229014	-0.198474	1.20837	0.255112	0.999039	-4.56306	CA	no_hit
GRHPR	Q9UBQ7	Glyoxylate reductase/hydroxypyruvate reductase OS=Homo sapiens OX=9606 GN=GRHPR PE=1 SV=1	40608	14	8.20436	0.171967	0.231554	1.20781	0.255321	0.999039	-4.56319	CA	no_hit
GGH	Q92820	Gamma-glutamyl hydrolase OS=Homo sapiens OX=9606 GN=GGH PE=1 SV=2	43337.1	7	7.71649	0.215305	0.451502	1.2077	0.255362	0.999039	-4.56322	CA	no_hit
POLR2C	P19387	DNA-directed RNA polymerase II subunit RPB3 OS=Homo sapiens OX=9606 GN=POLR2C PE=1 SV=2	36022.8	10	7.49069	-0.188894	-0.597767	-1.20656	0.255778	0.999039	-4.56347	CA	no_hit
ICE2	Q659A1	Little elongation complex subunit 2 OS=Homo sapiens OX=9606 GN=ICE2 PE=1 SV=2	137130	3	6.43276	-0.297069	-0.695566	-1.20604	0.255969	0.999039	-4.56359	CA	no_hit
XPO5	Q9HAV4	Exportin-5 OS=Homo sapiens OX=9606 GN=XPO5 PE=1 SV=1	157801	24	7.47851	0.187301	0.126477	1.2059	0.256024	0.999039	-4.56363	CA	no_hit
MRPL46	Q9H2W6	39S ribosomal protein L46, mitochondrial OS=Homo sapiens OX=9606 GN=MRPL46 PE=1 SV=1	36971	7	7.66488	-0.414051	-0.0975856	-1.20547	0.25618	0.999039	-4.56372	CA	no_hit
ALDH5A1	P51649|P51649-2	Succinate-semialdehyde dehydrogenase, mitochondrial OS=Homo sapiens OX=9606 GN=ALDH5A1 PE=1 SV=2|Isoform 2 of Succinate-semialdehyde dehydrogenase, mitochondrial OS=Homo sapiens OX=9606 GN=ALDH5A1	66551.4|67989.2	13	7.80638	0.163231	0.304757	1.2053	0.256243	0.999039	-4.56376	CA	no_hit
PKN2	Q16513-2|Q16513	Isoform 2 of Serine/threonine-protein kinase N2 OS=Homo sapiens OX=9606 GN=PKN2|Serine/threonine-protein kinase N2 OS=Homo sapiens OX=9606 GN=PKN2 PE=1 SV=1	130600.0|132897.0	17	7.15252	0.190014	0.0554052	1.20486	0.256407	0.999039	-4.56386	CA	no_hit
CISD3	P0C7P0	CDGSH iron-sulfur domain-containing protein 3, mitochondrial OS=Homo sapiens OX=9606 GN=CISD3 PE=1 SV=1	17286.4	4	7.31095	-0.376765	0.168298	-1.20477	0.25644	0.999039	-4.56388	CA	no_hit
DOP1B	Q9Y3R5|Q9Y3R5-2	Protein dopey-2 OS=Homo sapiens OX=9606 GN=DOP1B PE=1 SV=5|Isoform 2 of Protein dopey-2 OS=Homo sapiens OX=9606 GN=DOP1B	297157.0|296322.0	4	6.5541	0.205385	0.0188086	1.2042	0.256651	0.999039	-4.56401	CA	no_hit
CETN2	P41208	Centrin-2 OS=Homo sapiens OX=9606 GN=CETN2 PE=1 SV=1	27026.8	5	7.3918	-0.411185	0.468112	-1.20365	0.256854	0.999039	-4.56414	CA	no_hit
ITCH	Q96J02|Q96J02-2	E3 ubiquitin-protein ligase Itchy homolog OS=Homo sapiens OX=9606 GN=ITCH PE=1 SV=2|Isoform 2 of E3 ubiquitin-protein ligase Itchy homolog OS=Homo sapiens OX=9606 GN=ITCH	117891.0|113539.0	10	7.07799	0.188749	-0.00820724	1.20353	0.256898	0.999039	-4.56417	CA	no_hit
MTM1	Q13496	Myotubularin OS=Homo sapiens OX=9606 GN=MTM1 PE=1 SV=2	80743.8	12	7.15132	0.198788	-0.0672036	1.2028	0.257168	0.999039	-4.56433	CA	no_hit
DHX40	Q8IX18	Probable ATP-dependent RNA helicase DHX40 OS=Homo sapiens OX=9606 GN=DHX40 PE=1 SV=2	105634	8	6.9019	0.603008	-0.483484	1.20237	0.257328	0.999039	-4.56443	CA	no_hit
UBA1	P22314	Ubiquitin-like modifier-activating enzyme 1 OS=Homo sapiens OX=9606 GN=UBA1 PE=1 SV=3	134981	40	8.77956	0.147741	0.260584	1.20102	0.257824	0.999039	-4.56474	CA	no_hit
FGF2	A0A0A0MQV6|P09038|P09038-1|P09038-2|P09038-3	Fibroblast growth factor OS=Homo sapiens OX=9606 GN=FGF2 PE=1 SV=1|Fibroblast growth factor 2 OS=Homo sapiens OX=9606 GN=FGF2 PE=1 SV=3|Isoform 2 of Fibroblast growth factor 2 OS=Homo sapiens OX=9606 GN=FGF2|Isoform 3 of Fibroblast growth factor 2 OS=Homo sapiens OX=9606 GN=FGF2|Isoform 4 of Fibroblast growth factor 2 OS=Homo sapiens OX=9606 GN=FGF2	35334.0|35352.0|27095.7|21729.8|25676.9	3	7.07684	-0.345949	-1.31121	-1.20099	0.257838	0.999039	-4.56474	CA	no_hit
EBP	Q15125	3-beta-hydroxysteroid-Delta(8),Delta(7)-isomerase OS=Homo sapiens OX=9606 GN=EBP PE=1 SV=3	28997.5	2	7.70803	-0.27423	0.260688	-1.20094	0.257858	0.999039	-4.56476	CA	no_hit
PFKP	Q01813	ATP-dependent 6-phosphofructokinase, platelet type OS=Homo sapiens OX=9606 GN=PFKP PE=1 SV=2	99230.6	25	8.8387	0.17641	0.08159	1.20062	0.257973	0.999039	-4.56483	CA	no_hit
NUF2	E9PQC4|Q9BZD4	Kinetochore protein Nuf2 OS=Homo sapiens OX=9606 GN=NUF2 PE=1 SV=1|Kinetochore protein Nuf2 OS=Homo sapiens OX=9606 GN=NUF2 PE=1 SV=2	65152.6|72255.4	5	6.76593	0.242807	0.0495037	1.1999	0.258242	0.999039	-4.56499	CA	no_hit
ANXA4	P09525|P09525-2	Annexin A4 OS=Homo sapiens OX=9606 GN=ANXA4 PE=1 SV=4|Isoform 2 of Annexin A4 OS=Homo sapiens OX=9606 GN=ANXA4	42780.8|32141.0	25	8.86909	0.174026	0.513554	1.19911	0.258536	0.999039	-4.56517	CA	no_hit
IRGQ	Q8WZA9	Immunity-related GTPase family Q protein OS=Homo sapiens OX=9606 GN=IRGQ PE=1 SV=1	67450.5	10	7.36181	-0.372488	0.897759	-1.19902	0.258567	0.999039	-4.56519	CA	no_hit
CHCHD3	C9JRZ6|Q9NX63	MICOS complex subunit OS=Homo sapiens OX=9606 GN=CHCHD3 PE=1 SV=2|MICOS complex subunit MIC19 OS=Homo sapiens OX=9606 GN=CHCHD3 PE=1 SV=1	34018.4|33113.9	17	8.47294	0.206755	0.636738	1.19792	0.258976	0.999039	-4.56544	CA	no_hit
CCNT1	O60563	Cyclin-T1 OS=Homo sapiens OX=9606 GN=CCNT1 PE=1 SV=1	96852.4	8	7.36721	-0.616173	-1.90468	-1.19731	0.259203	0.999039	-4.56558	CA	no_hit
FUNDC2	Q9BWH2	FUN14 domain-containing protein 2 OS=Homo sapiens OX=9606 GN=FUNDC2 PE=1 SV=2	25891.3	4	7.60388	0.171448	0.184579	1.1973	0.259206	0.999039	-4.56558	CA	no_hit
SUMO1	B8ZZN6|P63165	Small ubiquitin-related modifier 1 OS=Homo sapiens OX=9606 GN=SUMO1 PE=1 SV=1|Small ubiquitin-related modifier 1 OS=Homo sapiens OX=9606 GN=SUMO1 PE=1 SV=1	20646.1|14953.0	6	7.81699	-0.278343	0.101021	-1.19621	0.259614	0.999039	-4.56583	CA	no_hit
ALDH2	P05091	Aldehyde dehydrogenase, mitochondrial OS=Homo sapiens OX=9606 GN=ALDH2 PE=1 SV=2	65680.8	16	8.55621	0.177809	0.407184	1.19499	0.26007	0.999039	-4.56611	CA	no_hit
PSMC4	P43686	26S proteasome regulatory subunit 6B OS=Homo sapiens OX=9606 GN=PSMC4 PE=1 SV=2	56272.6	23	8.37367	0.221962	0.689036	1.1939	0.260477	0.999039	-4.56635	CA	no_hit
C1QBP	Q07021|I3L3Q7	Complement component 1 Q subcomponent-binding protein, mitochondrial OS=Homo sapiens OX=9606 GN=C1QBP PE=1 SV=1|Complement component 1 Q subcomponent-binding protein, mitochondrial (Fragment) OS=Homo sapiens OX=9606 GN=C1QBP PE=1 SV=1|Complement component 1 Q subcomponent-binding protein, mitochondrial OS=Homo sapiens OX=9606 GN=C1QBP PE=1 SV=1	36609.1|23092.7	7	8.48053	-0.393555	0.85646	-1.19385	0.260494	0.999039	-4.56636	CA	no_hit
PDLIM1	O00151	PDZ and LIM domain protein 1 OS=Homo sapiens OX=9606 GN=PDLIM1 PE=1 SV=4	43197.8	17	8.18471	-0.334661	0.736767	-1.19377	0.260524	0.999039	-4.56638	CA	no_hit
RAB5B	P61020	Ras-related protein Rab-5B OS=Homo sapiens OX=9606 GN=RAB5B PE=1 SV=1	28178.9	7	7.60435	0.186123	0.52907	1.19346	0.260641	0.999039	-4.56645	CA	no_hit
ECD	O95905|O95905-3	Protein ecdysoneless homolog OS=Homo sapiens OX=9606 GN=ECD PE=1 SV=1|Isoform 3 of Protein ecdysoneless homolog OS=Homo sapiens OX=9606 GN=ECD	85203.4|89008.4	7	7.19674	0.1826	0.171777	1.19291	0.260848	0.999039	-4.56658	CA	no_hit
CLUH	A0A494C0R8	Clustered mitochondria protein homolog OS=Homo sapiens OX=9606 GN=CLUH PE=1 SV=1	171570	36	7.95798	0.206272	0.0787082	1.19287	0.26086	0.999039	-4.56659	CA	no_hit
SPOUT1	Q5T280	Putative methyltransferase C9orf114 OS=Homo sapiens OX=9606 GN=SPOUT1 PE=1 SV=3	50405	4	7.09126	0.241587	-2.77737	1.1927	0.260923	0.999039	-4.56662	CA	no_hit
RANBP3	Q9H6Z4|Q9H6Z4-3	Ran-binding protein 3 OS=Homo sapiens OX=9606 GN=RANBP3 PE=1 SV=1|Isoform 3 of Ran-binding protein 3 OS=Homo sapiens OX=9606 GN=RANBP3	69337.4|62237.9	10	7.4081	-0.194473	0.297635	-1.19268	0.260933	0.999039	-4.56663	CA	no_hit
COG1	E9PBL8|Q8WTW3	Conserved oligomeric Golgi complex subunit 1 (Fragment) OS=Homo sapiens OX=9606 GN=COG1 PE=1 SV=2|Conserved oligomeric Golgi complex subunit 1 OS=Homo sapiens OX=9606 GN=COG1 PE=1 SV=1	126347.0|127751.0	21	7.5499	0.200655	-0.358606	1.19244	0.261023	0.999039	-4.56668	CA	no_hit
TBC1D13	Q9NVG8	TBC1 domain family member 13 OS=Homo sapiens OX=9606 GN=TBC1D13 PE=1 SV=3	54147.6	8	7.31787	0.161612	0.281474	1.19114	0.26151	0.999039	-4.56698	CA	no_hit
HRAS	P01112	GTPase HRas OS=Homo sapiens OX=9606 GN=HRAS PE=1 SV=1	24973	3	7.44608	0.169737	0.214761	1.1907	0.261674	0.999039	-4.56708	CA	no_hit
TP53RK	Q96S44	EKC/KEOPS complex subunit TP53RK OS=Homo sapiens OX=9606 GN=TP53RK PE=1 SV=2	32515.8	4	7.15465	0.216723	0.254684	1.19062	0.261703	0.999039	-4.5671	CA	no_hit
XP32	Q5T750	Skin-specific protein 32 OS=Homo sapiens OX=9606 GN=XP32 PE=1 SV=1	31599.2	4	6.93507	2.49456	0.512372	1.18921	0.262232	0.999039	-4.56742	CA	no_hit
PLAA	Q9Y263	Phospholipase A-2-activating protein OS=Homo sapiens OX=9606 GN=PLAA PE=1 SV=2	102026	29	7.83385	0.146117	0.269799	1.18813	0.262639	0.999039	-4.56766	CA	no_hit
PXK	A0A0C4DG95|E9PD56|H7BYG4|Q7Z7A4|Q7Z7A4-2|Q7Z7A4-4|Q7Z7A4-6|Q7Z7A4-7|W5RWE6|Q7Z7A4-5	PX domain-containing protein kinase-like protein OS=Homo sapiens OX=9606 GN=PXK PE=1 SV=1|PX domain-containing protein kinase-like protein OS=Homo sapiens OX=9606 GN=PXK PE=1 SV=1|PX domain-containing protein kinase-like protein OS=Homo sapiens OX=9606 GN=PXK PE=1 SV=1|PX domain-containing protein kinase-like protein OS=Homo sapiens OX=9606 GN=PXK PE=1 SV=1|Isoform 2 of PX domain-containing prote…	79112.2|68905.1|70839.1|80385.3|72897.1|78327.2|76393.2|69986.6|78531.4|62749.8	4	6.38528	-0.329138	-0.942107	-1.18805	0.26267	0.999039	-4.56768	CA	no_hit
SPAG7	O75391	Sperm-associated antigen 7 OS=Homo sapiens OX=9606 GN=SPAG7 PE=1 SV=2	34041.7	6	7.26021	-0.362169	0.621459	-1.1877	0.262803	0.999039	-4.56776	CA	no_hit
MRPS12	O15235	28S ribosomal protein S12, mitochondrial OS=Homo sapiens OX=9606 GN=MRPS12 PE=1 SV=1	18908.4	3	7.30275	-0.4222	-1.00706	-1.1873	0.262953	0.999039	-4.56785	CA	no_hit
ERLIN2	E5RHW4|O94905	Erlin-2 (Fragment) OS=Homo sapiens OX=9606 GN=ERLIN2 PE=1 SV=1|Erlin-2 OS=Homo sapiens OX=9606 GN=ERLIN2 PE=1 SV=1	47664.1|47778.2	11	7.83791	0.169172	0.203638	1.18696	0.263078	0.999039	-4.56792	CA	no_hit
FTSJ1	Q9UET6|Q9UET6-2	Putative tRNA (cytidine(32)/guanosine(34)-2'-O)-methyltransferase OS=Homo sapiens OX=9606 GN=FTSJ1 PE=1 SV=2|Putative tRNA (cytidine(32)/guanosine(34)-2'-O)-methyltransferase OS=Homo sapiens OX=9606 GN=FTSJ1 PE=1 SV=2|Isoform 2 of Putative tRNA (cytidine(32)/guanosine(34)-2'-O)-methyltransferase OS=Homo sapiens OX=9606 GN=FTSJ1	41550.6|41338.5	4	6.93137	-0.315405	0.0393934	-1.1869	0.263101	0.999039	-4.56794	CA	no_hit
RAB10	P61026	Ras-related protein Rab-10 OS=Homo sapiens OX=9606 GN=RAB10 PE=1 SV=1	29143	11	8.79354	0.148457	0.0836497	1.18667	0.26319	0.999039	-4.56799	CA	no_hit
NDUFS3	O75489	NADH dehydrogenase [ubiquinone] iron-sulfur protein 3, mitochondrial OS=Homo sapiens OX=9606 GN=NDUFS3 PE=1 SV=1	33987.2	15	8.25473	0.173817	0.768194	1.18634	0.263315	0.999039	-4.56807	CA	no_hit
LARS2	E9PHM2|Q15031	Probable leucine--tRNA ligase, mitochondrial OS=Homo sapiens OX=9606 GN=LARS2 PE=1 SV=1|Probable leucine--tRNA ligase, mitochondrial OS=Homo sapiens OX=9606 GN=LARS2 PE=1 SV=2|Probable leucine--tRNA ligase, mitochondrial OS=Homo sapiens OX=9606 GN=LARS2 PE=1 SV=2	114513.0|121076.0	18	7.54092	0.182411	0.0347646	1.18589	0.263482	0.999039	-4.56817	CA	no_hit
DHRS7B	A0A0C4DGQ8|Q6IAN0	Dehydrogenase/reductase SDR family member 7B OS=Homo sapiens OX=9606 GN=DHRS7B PE=1 SV=1|Dehydrogenase/reductase SDR family member 7B OS=Homo sapiens OX=9606 GN=DHRS7B PE=1 SV=2	39263.5|41770.1	6	7.39215	0.1826	-0.118292	1.18567	0.263565	0.999039	-4.56822	CA	no_hit
SLC27A4	Q6P1M0	Long-chain fatty acid transport protein 4 OS=Homo sapiens OX=9606 GN=SLC27A4 PE=1 SV=1	82360.9	19	7.94086	0.159525	-0.00215839	1.18505	0.263799	0.999039	-4.56836	CA	no_hit
MTRF1L	Q9UGC7|Q9UGC7-2|Q9UGC7-4	Peptide chain release factor 1-like, mitochondrial OS=Homo sapiens OX=9606 GN=MTRF1L PE=1 SV=1|Isoform 2 of Peptide chain release factor 1-like, mitochondrial OS=Homo sapiens OX=9606 GN=MTRF1L|Isoform 4 of Peptide chain release factor 1-like, mitochondrial OS=Homo sapiens OX=9606 GN=MTRF1L|Peptide chain release factor 1-like, mitochondrial OS=Homo sapiens OX=9606 GN=MTRF1L PE=1 SV=1	50683.6|34824.9|30086.6	4	7.8608	0.319183	-1.56457	1.1843	0.264084	0.999039	-4.56853	CA	no_hit
RBM17	Q96I25	Splicing factor 45 OS=Homo sapiens OX=9606 GN=RBM17 PE=1 SV=1	56113.5	13	7.56933	-0.375016	-1.36441	-1.1834	0.264422	0.999039	-4.56873	CA	no_hit
PPP4R2	Q9NY27	Serine/threonine-protein phosphatase 4 regulatory subunit 2 OS=Homo sapiens OX=9606 GN=PPP4R2 PE=1 SV=3	55177.4	10	7.52855	0.150096	0.272005	1.18254	0.264749	0.999039	-4.56892	CA	no_hit
TAPBP	O15533-3|Q6P1N7|A0A0A0MSV9|A0A0G2JH37|A0A0G2JKZ1|A2AB90|O15533|O15533-2	Isoform 3 of Tapasin OS=Homo sapiens OX=9606 GN=TAPBP|TAPBP protein OS=Homo sapiens OX=9606 GN=TAPBP PE=1 SV=1|Tapasin OS=Homo sapiens OX=9606 GN=TAPBP PE=1 SV=1|Tapasin OS=Homo sapiens OX=9606 GN=TAPBP PE=1 SV=1|Tapasin OS=Homo sapiens OX=9606 GN=TAPBP PE=1 SV=1|Tapasin OS=Homo sapiens OX=9606 GN=TAPBP PE=1 SV=1|Tapasin OS=Homo sapiens OX=9606 GN=TAPBP PE=1 SV=1|Isoform 2 of Tapasin OS=Homo sapi…	58680.9|17876.4|58625.9|53812.4|51569.3|53757.4|51892.5|46937.6	3	7.23187	-0.244091	0.566408	-1.18218	0.264885	0.999039	-4.569	CA	no_hit
PAXIP1	Q6ZW49|Q6ZW49-1|Q6ZW49-2	PAX-interacting protein 1 OS=Homo sapiens OX=9606 GN=PAXIP1 PE=1 SV=2|Isoform 2 of PAX-interacting protein 1 OS=Homo sapiens OX=9606 GN=PAXIP1|Isoform 3 of PAX-interacting protein 1 OS=Homo sapiens OX=9606 GN=PAXIP1|PAX-interacting protein 1 OS=Homo sapiens OX=9606 GN=PAXIP1 PE=1 SV=2	140829.0|135963.0|107208.0	4	6.55411	-0.4832	-1.04336	-1.18108	0.265304	0.999039	-4.56925	CA	no_hit
RHOF	Q9HBH0	Rho-related GTP-binding protein RhoF OS=Homo sapiens OX=9606 GN=RHOF PE=1 SV=1	28876.7	7	7.2389	-0.298663	-0.0376934	-1.18065	0.265464	0.999039	-4.56935	CA	no_hit
KCTD1	A0A2U3U043	BTB/POZ domain-containing protein KCTD1 OS=Homo sapiens OX=9606 GN=KCTD1 PE=1 SV=1	108636	5	6.862	-0.167251	0.262101	-1.18058	0.26549	0.999039	-4.56936	CA	no_hit
PFKFB2	O60825|O60825-2	6-phosphofructo-2-kinase/fructose-2,6-bisphosphatase 2 OS=Homo sapiens OX=9606 GN=PFKFB2 PE=1 SV=2|Isoform 2 of 6-phosphofructo-2-kinase/fructose-2,6-bisphosphatase 2 OS=Homo sapiens OX=9606 GN=PFKFB2	69296.0|64676.5	6	6.98778	0.168112	0.468834	1.1798	0.265789	0.999039	-4.56954	CA	no_hit
SBDS	A0A087X020|Q9Y3A5	Ribosome maturation protein SBDS OS=Homo sapiens OX=9606 GN=SBDS PE=1 SV=1|Ribosome maturation protein SBDS OS=Homo sapiens OX=9606 GN=SBDS PE=1 SV=4	39170.3|39069.3	13	8.06147	0.20058	0.347503	1.17978	0.265794	0.999039	-4.56954	CA	no_hit
ANKMY2	Q8IV38	Ankyrin repeat and MYND domain-containing protein 2 OS=Homo sapiens OX=9606 GN=ANKMY2 PE=1 SV=1	62765.6	4	6.90749	0.18151	0.359667	1.17898	0.2661	0.999039	-4.56973	CA	no_hit
MTOR	P42345	Serine/threonine-protein kinase mTOR OS=Homo sapiens OX=9606 GN=MTOR PE=1 SV=1	330306	41	7.59508	0.194984	-0.0519803	1.17799	0.266477	0.999039	-4.56995	CA	no_hit
CAP1	Q01518|Q01518-2	Adenylyl cyclase-associated protein 1 OS=Homo sapiens OX=9606 GN=CAP1 PE=1 SV=5|Isoform 2 of Adenylyl cyclase-associated protein 1 OS=Homo sapiens OX=9606 GN=CAP1	65710.0|65638.9	21	8.85778	0.226888	0.526524	1.1775	0.266664	0.999039	-4.57006	CA	no_hit
SEC24B	O95487|O95487-2|O95487-3	Protein transport protein Sec24B OS=Homo sapiens OX=9606 GN=SEC24B PE=1 SV=2|Isoform 2 of Protein transport protein Sec24B OS=Homo sapiens OX=9606 GN=SEC24B|Isoform 3 of Protein transport protein Sec24B OS=Homo sapiens OX=9606 GN=SEC24B	150393.0|146606.0|153394.0	13	7.48888	-0.159289	-0.0161307	-1.17735	0.26672	0.999039	-4.57009	CA	no_hit
ASL	P04424|P04424-2	Argininosuccinate lyase OS=Homo sapiens OX=9606 GN=ASL PE=1 SV=4|Argininosuccinate lyase OS=Homo sapiens OX=9606 GN=ASL PE=1 SV=4|Isoform 2 of Argininosuccinate lyase OS=Homo sapiens OX=9606 GN=ASL	57994.6|55182.0	11	7.44424	0.191928	0.026753	1.17631	0.267114	0.999039	-4.57033	CA	no_hit
RDH14	Q9HBH5	Retinol dehydrogenase 14 OS=Homo sapiens OX=9606 GN=RDH14 PE=1 SV=1	41138.2	8	7.51907	0.151593	0.021214	1.17627	0.26713	0.999039	-4.57034	CA	no_hit
MTFMT	Q96DP5	Methionyl-tRNA formyltransferase, mitochondrial OS=Homo sapiens OX=9606 GN=MTFMT PE=1 SV=2	51808.5	9	7.01171	0.204816	-0.0289651	1.17596	0.26725	0.999039	-4.57041	CA	no_hit
CUL4A	Q13619	Cullin-4A OS=Homo sapiens OX=9606 GN=CUL4A PE=1 SV=3	109128	21	7.66174	0.232115	-0.187157	1.17553	0.267413	0.999039	-4.5705	CA	no_hit
WDR54	Q9H977|Q9H977-4	WD repeat-containing protein 54 OS=Homo sapiens OX=9606 GN=WDR54 PE=1 SV=1|Isoform 2 of WD repeat-containing protein 54 OS=Homo sapiens OX=9606 GN=WDR54	37712.0|39296.8	3	6.42359	-0.172109	0.43927	-1.17553	0.267414	0.999039	-4.5705	CA	no_hit
POLA1	A6NMQ1|P09884	DNA polymerase OS=Homo sapiens OX=9606 GN=POLA1 PE=1 SV=1|DNA polymerase alpha catalytic subunit OS=Homo sapiens OX=9606 GN=POLA1 PE=1 SV=2	209853.0|209251.0	24	7.59326	0.169241	-0.0938727	1.17418	0.267929	0.999039	-4.57081	CA	no_hit
VPS50	Q96JG6	Syndetin OS=Homo sapiens OX=9606 GN=VPS50 PE=1 SV=3	134166	16	7.2569	0.161556	0.0504707	1.1739	0.268036	0.999039	-4.57087	CA	no_hit
SRP19	A0A087WYR0|P09132	Signal recognition particle 19 kDa protein OS=Homo sapiens OX=9606 GN=SRP19 PE=1 SV=1|Signal recognition particle 19 kDa protein OS=Homo sapiens OX=9606 GN=SRP19 PE=1 SV=3	18987.8|21545.0	4	7.33852	-0.357406	0.940917	-1.17328	0.268273	0.999039	-4.57101	CA	no_hit
NCLN	Q969V3|Q969V3-2	Nicalin OS=Homo sapiens OX=9606 GN=NCLN PE=1 SV=2|Isoform 2 of Nicalin OS=Homo sapiens OX=9606 GN=NCLN	69494.0|69365.9	17	7.90247	0.139616	0.24041	1.1727	0.268494	0.999039	-4.57114	CA	no_hit
EDF1	O60869	Endothelial differentiation-related factor 1 OS=Homo sapiens OX=9606 GN=EDF1 PE=1 SV=1	22443	12	8.17479	-0.478564	0.918628	-1.1724	0.26861	0.999039	-4.57121	CA	no_hit
ZC3H12A	Q5D1E8	Endoribonuclease ZC3H12A OS=Homo sapiens OX=9606 GN=ZC3H12A PE=1 SV=1	74803	3	6.4066	-0.255714	0.0579809	-1.17212	0.268719	0.999039	-4.57127	CA	no_hit
PLS1	Q14651	Plastin-1 OS=Homo sapiens OX=9606 GN=PLS1 PE=1 SV=2	86123	18	8.13005	0.136069	0.438269	1.17204	0.268749	0.999039	-4.57129	CA	no_hit
IMPDH2	P12268	Inosine-5'-monophosphate dehydrogenase 2 OS=Homo sapiens OX=9606 GN=IMPDH2 PE=1 SV=2	67481.5	22	8.46097	0.201341	0.364985	1.17171	0.268875	0.999039	-4.57136	CA	no_hit
TMEM126A	Q9H061	Transmembrane protein 126A OS=Homo sapiens OX=9606 GN=TMEM126A PE=1 SV=1	24783.6	5	7.59527	-0.206711	0.447373	-1.17157	0.26893	0.999039	-4.57139	CA	no_hit
NPEPPS	E9PLK3|P55786	Aminopeptidase OS=Homo sapiens OX=9606 GN=NPEPPS PE=1 SV=1|Puromycin-sensitive aminopeptidase OS=Homo sapiens OX=9606 GN=NPEPPS PE=1 SV=2	121060.0|121235.0	36	8.30443	0.183521	0.230184	1.17142	0.268985	0.999039	-4.57143	CA	no_hit
ATP7A	Q04656|Q04656-2|Q04656-3|Q04656-5	Copper-transporting ATPase 1 OS=Homo sapiens OX=9606 GN=ATP7A PE=1 SV=4|Isoform 1 of Copper-transporting ATPase 1 OS=Homo sapiens OX=9606 GN=ATP7A|Isoform 2 of Copper-transporting ATPase 1 OS=Homo sapiens OX=9606 GN=ATP7A|Isoform 5 of Copper-transporting ATPase 1 OS=Homo sapiens OX=9606 GN=ATP7A	191521.0|194169.0|201494.0|180990.0	10	6.99969	0.1457	0.099617	1.17109	0.26911	0.999039	-4.5715	CA	no_hit
SEC23A	F5H365|Q15436|Q15436-2	Protein transport protein SEC23 OS=Homo sapiens OX=9606 GN=SEC23A PE=1 SV=1|Protein transport protein Sec23A OS=Homo sapiens OX=9606 GN=SEC23A PE=1 SV=2|Isoform 2 of Protein transport protein Sec23A OS=Homo sapiens OX=9606 GN=SEC23A	92650.0|95839.6|70570.6	17	7.97245	-0.169278	0.13131	-1.17107	0.269119	0.999039	-4.5715	CA	no_hit
RAB1A	P62820	Ras-related protein Rab-1A OS=Homo sapiens OX=9606 GN=RAB1A PE=1 SV=3	28063	7	8.56693	0.177364	0.374248	1.17045	0.269358	0.999039	-4.57164	CA	no_hit
ARL1	B4DZG7|F8VYN9|P40616|P40616-2	ADP-ribosylation factor-like protein 1 OS=Homo sapiens OX=9606 GN=ARL1 PE=1 SV=1|ADP-ribosylation factor-like protein 1 OS=Homo sapiens OX=9606 GN=ARL1 PE=1 SV=1|ADP-ribosylation factor-like protein 1 OS=Homo sapiens OX=9606 GN=ARL1 PE=1 SV=1|Isoform 2 of ADP-ribosylation factor-like protein 1 OS=Homo sapiens OX=9606 GN=ARL1	18588.9|25338.4|23864.8|22013.9	3	7.10357	0.23588	0.298309	1.16979	0.269611	0.999039	-4.57179	CA	no_hit
EXOC4	Q96A65	Exocyst complex component 4 OS=Homo sapiens OX=9606 GN=EXOC4 PE=1 SV=1	133377	21	7.66207	0.2478	-0.16986	1.16979	0.269613	0.999039	-4.57179	CA	no_hit
E9PSI1	E9PSI1	Transmembrane 9 superfamily member OS=Homo sapiens OX=9606 PE=3 SV=1	103185	8	7.84491	0.159307	0.24921	1.16949	0.269726	0.999039	-4.57186	CA	no_hit
MRPL17	Q9NRX2	39S ribosomal protein L17, mitochondrial OS=Homo sapiens OX=9606 GN=MRPL17 PE=1 SV=1	22224	8	7.59147	0.219239	-0.482527	1.16897	0.269927	0.999039	-4.57198	CA	no_hit
ALDH9A1	P49189	4-trimethylaminobutyraldehyde dehydrogenase OS=Homo sapiens OX=9606 GN=ALDH9A1 PE=1 SV=3	62892.9	20	8.14527	0.191237	0.520099	1.16842	0.270136	0.999039	-4.5721	CA	no_hit
STX4	Q12846	Syntaxin-4 OS=Homo sapiens OX=9606 GN=STX4 PE=1 SV=2	40661.3	9	7.80004	-0.212369	0.0968001	-1.16822	0.270213	0.999039	-4.57214	CA	no_hit
PLCB1	Q9NQ66	1-phosphatidylinositol 4,5-bisphosphate phosphodiesterase beta-1 OS=Homo sapiens OX=9606 GN=PLCB1 PE=1 SV=1	176448	15	7.1631	0.164565	0.090016	1.16815	0.270241	0.999039	-4.57216	CA	no_hit
BTF3L4	E9PL10|Q96K17	Transcription factor BTF3 OS=Homo sapiens OX=9606 GN=BTF3L4 PE=1 SV=1|Transcription factor BTF3 homolog 4 OS=Homo sapiens OX=9606 GN=BTF3L4 PE=1 SV=1	20940.9|22431.5	4	7.52926	-0.360466	0.729133	-1.16814	0.270246	0.999039	-4.57216	CA	no_hit
MIEN1	Q9BRT3	Migration and invasion enhancer 1 OS=Homo sapiens OX=9606 GN=MIEN1 PE=1 SV=1	13783.1	2	7.08975	-0.399937	0.348721	-1.16759	0.270457	0.999039	-4.57228	CA	no_hit
LIMCH1	Q9UPQ0|Q9UPQ0-10|Q9UPQ0-2|Q9UPQ0-3|Q9UPQ0-4	LIM and calponin homology domains-containing protein 1 OS=Homo sapiens OX=9606 GN=LIMCH1 PE=1 SV=4|Isoform 10 of LIM and calponin homology domains-containing protein 1 OS=Homo sapiens OX=9606 GN=LIMCH1|Isoform 2 of LIM and calponin homology domains-containing protein 1 OS=Homo sapiens OX=9606 GN=LIMCH1|Isoform 3 of LIM and calponin homology domains-containing protein 1 OS=Homo sapiens OX=9606 GN=…	149284.0|146008.0|146136.0|202326.0|147553.0	25	7.37467	-0.225478	-0.106779	-1.16756	0.270469	0.999039	-4.57229	CA	no_hit
HNRNPUL2	Q1KMD3	Heterogeneous nuclear ribonucleoprotein U-like protein 2 OS=Homo sapiens OX=9606 GN=HNRNPUL2 PE=1 SV=1	99920.1	32	8.40086	0.343955	-2.44533	1.1666	0.270837	0.999039	-4.57251	CA	no_hit
RAB3GAP2	Q9H2M9	Rab3 GTPase-activating protein non-catalytic subunit OS=Homo sapiens OX=9606 GN=RAB3GAP2 PE=1 SV=1	184861	28	7.58929	0.152413	0.169515	1.1664	0.270914	0.999039	-4.57255	CA	no_hit
ZC3H11A	O75152	Zinc finger CCCH domain-containing protein 11A OS=Homo sapiens OX=9606 GN=ZC3H11A PE=1 SV=3	115789	15	7.31377	-0.252369	-1.24674	-1.16609	0.271035	0.999039	-4.57262	CA	no_hit
PNP	P00491|G3V2H3	Purine nucleoside phosphorylase OS=Homo sapiens OX=9606 GN=PNP PE=1 SV=2|Purine nucleoside phosphorylase (Fragment) OS=Homo sapiens OX=9606 GN=PNP PE=1 SV=1|Purine nucleoside phosphorylase OS=Homo sapiens OX=9606 GN=PNP PE=1 SV=2	35975.7|11491.8	19	8.53511	0.138971	0.453002	1.16585	0.271127	0.999039	-4.57267	CA	no_hit
ATP2A2	P16615	Sarcoplasmic/endoplasmic reticulum calcium ATPase 2 OS=Homo sapiens OX=9606 GN=ATP2A2 PE=1 SV=1	133676	37	8.9077	0.144259	0.320451	1.16533	0.271329	0.999039	-4.57279	CA	no_hit
FXN	C9JAX1|Q16595	Frataxin, mitochondrial OS=Homo sapiens OX=9606 GN=FXN PE=1 SV=1|Frataxin, mitochondrial OS=Homo sapiens OX=9606 GN=FXN PE=1 SV=2	18247.7|27189.6	4	6.73145	-0.428612	0.439713	-1.16526	0.271354	0.999039	-4.57281	CA	no_hit
COASY	Q13057|Q13057-2	Bifunctional coenzyme A synthase OS=Homo sapiens OX=9606 GN=COASY PE=1 SV=4|Isoform 2 of Bifunctional coenzyme A synthase OS=Homo sapiens OX=9606 GN=COASY	69324.6|72333.3	12	7.8457	0.144433	0.194568	1.16521	0.271375	0.999039	-4.57282	CA	no_hit
PFDN5	Q99471	Prefoldin subunit 5 OS=Homo sapiens OX=9606 GN=PFDN5 PE=1 SV=2	22545.5	7	7.71882	-0.544976	1.35768	-1.16408	0.27181	0.999039	-4.57307	CA	no_hit
CDC27	G5EA36|P30260|P30260-2	Cell division cycle 27, isoform CRA_c OS=Homo sapiens OX=9606 GN=CDC27 PE=1 SV=1|Cell division cycle protein 27 homolog OS=Homo sapiens OX=9606 GN=CDC27 PE=1 SV=2|Isoform 2 of Cell division cycle protein 27 homolog OS=Homo sapiens OX=9606 GN=CDC27|Cell division cycle protein 27 homolog OS=Homo sapiens OX=9606 GN=CDC27 PE=1 SV=2|Isoform 2 of Cell division cycle protein 27 homolog OS=Homo sapiens O…	110712.0|110841.0|111585.0	21	7.67495	-0.21821	-0.263258	-1.16396	0.271859	0.999039	-4.5731	CA	no_hit
SF3B5	Q9BWJ5	Splicing factor 3B subunit 5 OS=Homo sapiens OX=9606 GN=SF3B5 PE=1 SV=1	11763.9	3	7.39928	-0.54988	-0.10873	-1.16371	0.271953	0.999039	-4.57315	CA	no_hit
TBC1D5	Q92609|Q92609-2	TBC1 domain family member 5 OS=Homo sapiens OX=9606 GN=TBC1D5 PE=1 SV=1|Isoform 2 of TBC1 domain family member 5 OS=Homo sapiens OX=9606 GN=TBC1D5	102600.0|104810.0	15	7.29446	-0.176173	0.14363	-1.16239	0.272465	0.999039	-4.57345	CA	no_hit
GLRX3	O76003	Glutaredoxin-3 OS=Homo sapiens OX=9606 GN=GLRX3 PE=1 SV=2	46515.4	11	8.30138	0.22593	0.609147	1.16195	0.272637	0.999039	-4.57355	CA	no_hit
GMDS	O60547	GDP-mannose 4,6 dehydratase OS=Homo sapiens OX=9606 GN=GMDS PE=1 SV=1	50174.8	15	7.75936	0.16523	0.288928	1.16168	0.272741	0.999039	-4.57361	CA	no_hit
ACSF2	E9PF16|Q96CM8|Q96CM8-2|Q96CM8-3	Medium-chain acyl-CoA ligase ACSF2, mitochondrial OS=Homo sapiens OX=9606 GN=ACSF2 PE=1 SV=1|Medium-chain acyl-CoA ligase ACSF2, mitochondrial OS=Homo sapiens OX=9606 GN=ACSF2 PE=1 SV=2|Isoform 2 of Medium-chain acyl-CoA ligase ACSF2, mitochondrial OS=Homo sapiens OX=9606 GN=ACSF2|Isoform 3 of Medium-chain acyl-CoA ligase ACSF2, mitochondrial OS=Homo sapiens OX=9606 GN=ACSF2	75114.0|80248.8|82745.0|78923.0	11	7.65386	0.141544	0.332596	1.16141	0.272843	0.999039	-4.57367	CA	no_hit
ANAPC2	Q9UJX6|Q9UJX6-2	Anaphase-promoting complex subunit 2 OS=Homo sapiens OX=9606 GN=ANAPC2 PE=1 SV=1|Isoform 2 of Anaphase-promoting complex subunit 2 OS=Homo sapiens OX=9606 GN=ANAPC2	103446.0|103087.0	14	7.26847	0.212188	-0.107246	1.16055	0.273178	0.999039	-4.57386	CA	no_hit
NUP98	P52948|P52948-5	Nuclear pore complex protein Nup98-Nup96 OS=Homo sapiens OX=9606 GN=NUP98 PE=1 SV=4|Isoform 5 of Nuclear pore complex protein Nup98-Nup96 OS=Homo sapiens OX=9606 GN=NUP98	224759.0|222694.0	44	7.85431	-0.210632	-0.353808	-1.16011	0.273351	0.999039	-4.57396	CA	no_hit
AP2A2	O94973	AP-2 complex subunit alpha-2 OS=Homo sapiens OX=9606 GN=AP2A2 PE=1 SV=2	120322	21	7.83517	0.188471	-0.297033	1.15998	0.273402	0.999039	-4.57399	CA	no_hit
HSD17B12	Q53GQ0	Very-long-chain 3-oxoacyl-CoA reductase OS=Homo sapiens OX=9606 GN=HSD17B12 PE=1 SV=2	42934	11	8.44462	0.159756	0.0909845	1.15911	0.273739	0.999039	-4.57418	CA	no_hit
CDC123	O75794	Cell division cycle protein 123 homolog OS=Homo sapiens OX=9606 GN=CDC123 PE=1 SV=1	46258.9	9	7.50458	0.138265	0.221745	1.15902	0.273773	0.999039	-4.5742	CA	no_hit
MAPK14	B4E0K5|Q16539	Mitogen-activated protein kinase OS=Homo sapiens OX=9606 GN=MAPK14 PE=1 SV=1|Mitogen-activated protein kinase 14 OS=Homo sapiens OX=9606 GN=MAPK14 PE=1 SV=3	36462.0|47275.0	6	7.37508	0.19982	0.237295	1.15887	0.27383	0.999039	-4.57423	CA	no_hit
DRG2	A8MZF9|P55039	Developmentally-regulated GTP-binding protein 2 OS=Homo sapiens OX=9606 GN=DRG2 PE=1 SV=1|Developmentally-regulated GTP-binding protein 2 OS=Homo sapiens OX=9606 GN=DRG2 PE=1 SV=1|Developmentally-regulated GTP-binding protein 2 OS=Homo sapiens OX=9606 GN=DRG2 PE=1 SV=1	47326.2|50854.2	13	7.6489	0.147154	0.281094	1.15734	0.274427	0.999039	-4.57457	CA	no_hit
MAP7D1	Q3KQU3|Q3KQU3-2|Q3KQU3-4	MAP7 domain-containing protein 1 OS=Homo sapiens OX=9606 GN=MAP7D1 PE=1 SV=1|Isoform 2 of MAP7 domain-containing protein 1 OS=Homo sapiens OX=9606 GN=MAP7D1|Isoform 4 of MAP7 domain-containing protein 1 OS=Homo sapiens OX=9606 GN=MAP7D1	112880.0|107819.0|109472.0	10	7.10059	-0.26179	-1.65734	-1.15725	0.274461	0.999039	-4.57459	CA	no_hit
TRIM16	O95361	Tripartite motif-containing protein 16 OS=Homo sapiens OX=9606 GN=TRIM16 PE=1 SV=3	76443.8	20	7.87716	0.147426	0.339033	1.15699	0.274563	0.999039	-4.57465	CA	no_hit
KLC4	Q9NSK0|Q9NSK0-3	Kinesin light chain 4 OS=Homo sapiens OX=9606 GN=KLC4 PE=1 SV=3|Isoform 3 of Kinesin light chain 4 OS=Homo sapiens OX=9606 GN=KLC4	78180.0|80395.2	12	7.22203	-0.20803	0.241106	-1.15688	0.274607	0.999039	-4.57468	CA	no_hit
MFF	Q9GZY8|Q9GZY8-2	Mitochondrial fission factor OS=Homo sapiens OX=9606 GN=MFF PE=1 SV=1|Isoform 2 of Mitochondrial fission factor OS=Homo sapiens OX=9606 GN=MFF|Isoform 2 of Mitochondrial fission factor OS=Homo sapiens OX=9606 GN=MFF	41539.9|35443.8	12	7.40337	-0.367924	0.316319	-1.15673	0.274666	0.999039	-4.57471	CA	no_hit
MELTF	P08582	Melanotransferrin OS=Homo sapiens OX=9606 GN=MELTF PE=1 SV=2	89365.1	4	6.40019	0.283644	-0.450008	1.15632	0.274823	0.999039	-4.5748	CA	no_hit
CBX3	Q13185	Chromobox protein homolog 3 OS=Homo sapiens OX=9606 GN=CBX3 PE=1 SV=4	28574.6	9	8.3394	-0.381322	0.0430827	-1.15623	0.27486	0.999039	-4.57482	CA	no_hit
HTATIP2	Q9BUP3-2|Q9BUP3-3	Isoform 2 of Oxidoreductase HTATIP2 OS=Homo sapiens OX=9606 GN=HTATIP2|Isoform 3 of Oxidoreductase HTATIP2 OS=Homo sapiens OX=9606 GN=HTATIP2	17984.6|36728.1	18	8.41144	0.149598	0.477009	1.15582	0.275019	0.999039	-4.57491	CA	no_hit
RAB1B	Q9H0U4	Ras-related protein Rab-1B OS=Homo sapiens OX=9606 GN=RAB1B PE=1 SV=1	27195.6	9	8.17177	0.138956	0.363056	1.15545	0.275162	0.999039	-4.575	CA	no_hit
SEC24C	P53992	Protein transport protein Sec24C OS=Homo sapiens OX=9606 GN=SEC24C PE=1 SV=3	131044	22	8.01327	-0.18913	-0.0720787	-1.15505	0.275319	0.999039	-4.57508	CA	no_hit
RPRD1B	Q9NQG5	Regulation of nuclear pre-mRNA domain-containing protein 1B OS=Homo sapiens OX=9606 GN=RPRD1B PE=1 SV=1	45813.2	10	7.32881	-0.36233	0.87094	-1.15316	0.27606	0.999039	-4.57551	CA	no_hit
AZGP1	C9JEV0|P25311	Zinc-alpha-2-glycoprotein OS=Homo sapiens OX=9606 GN=AZGP1 PE=1 SV=1|Zinc-alpha-2-glycoprotein OS=Homo sapiens OX=9606 GN=AZGP1 PE=1 SV=2	31375.6|40549.3	5	6.6454	1.5256	0.141297	1.15285	0.27618	0.999039	-4.57557	CA	no_hit
CNDP2	Q96KP4	Cytosolic non-specific dipeptidase OS=Homo sapiens OX=9606 GN=CNDP2 PE=1 SV=2	64138.5	18	8.07718	0.142255	0.401101	1.15272	0.276231	0.999039	-4.5756	CA	no_hit
FAM120B	A0A0D9SEJ5|F5GY05|Q96EK7	Constitutive coactivator of peroxisome proliferator-activated receptor gamma OS=Homo sapiens OX=9606 GN=FAM120B PE=1 SV=1|Constitutive coactivator of peroxisome proliferator-activated receptor gamma OS=Homo sapiens OX=9606 GN=FAM120B PE=1 SV=1|Constitutive coactivator of peroxisome proliferator-activated receptor gamma OS=Homo sapiens OX=9606 GN=FAM120B PE=1 SV=1	119949.0|121182.0|118546.0	6	6.61296	0.219409	-0.260649	1.15161	0.276664	0.999039	-4.57585	CA	no_hit
MTCH2	Q9Y6C9	Mitochondrial carrier homolog 2 OS=Homo sapiens OX=9606 GN=MTCH2 PE=1 SV=1	37282.4	9	8.26728	0.140246	0.126648	1.15137	0.276762	0.999039	-4.5759	CA	no_hit
RDH11	Q8TC12	Retinol dehydrogenase 11 OS=Homo sapiens OX=9606 GN=RDH11 PE=1 SV=2	40934.1	10	8.15424	0.156268	0.059715	1.15099	0.276909	0.999039	-4.57599	CA	no_hit
PGP	A6NDG6	Glycerol-3-phosphate phosphatase OS=Homo sapiens OX=9606 GN=PGP PE=1 SV=1	38091.2	9	7.67509	0.297208	0.835282	1.15075	0.277003	0.999039	-4.57604	CA	no_hit
RPL23	P62829	60S ribosomal protein L23 OS=Homo sapiens OX=9606 GN=RPL23 PE=1 SV=1	19533.2	10	8.51402	-0.233117	-1.41865	-1.15039	0.277146	0.999039	-4.57612	CA	no_hit
ANP32A	H0YN26|P39687	Acidic leucine-rich nuclear phosphoprotein 32 family member A OS=Homo sapiens OX=9606 GN=ANP32A PE=1 SV=1|Acidic leucine-rich nuclear phosphoprotein 32 family member A OS=Homo sapiens OX=9606 GN=ANP32A PE=1 SV=1	24358.0|33549.6	9	8.58945	-0.368049	0.302514	-1.14998	0.277308	0.999039	-4.57621	CA	no_hit
IREB2	P48200	Iron-responsive element-binding protein 2 OS=Homo sapiens OX=9606 GN=IREB2 PE=1 SV=4	125488	8	7.22451	-0.201262	0.0369261	-1.14991	0.277333	0.999039	-4.57623	CA	no_hit
ULK3	Q6PHR2|Q6PHR2-3|Q6PHR2-4	Serine/threonine-protein kinase ULK3 OS=Homo sapiens OX=9606 GN=ULK3 PE=1 SV=2|Isoform 3 of Serine/threonine-protein kinase ULK3 OS=Homo sapiens OX=9606 GN=ULK3|Isoform 4 of Serine/threonine-protein kinase ULK3 OS=Homo sapiens OX=9606 GN=ULK3|Serine/threonine-protein kinase ULK3 OS=Homo sapiens OX=9606 GN=ULK3 PE=1 SV=2|Isoform 3 of Serine/threonine-protein kinase ULK3 OS=Homo sapiens OX=9606 GN=…	61966.5|61435.1|63385.1	5	6.61156	0.312102	-0.0500024	1.1491	0.277653	0.999039	-4.57641	CA	no_hit
ITPR3	Q14573	Inositol 1,4,5-trisphosphate receptor type 3 OS=Homo sapiens OX=9606 GN=ITPR3 PE=1 SV=2	357319	43	7.55294	0.26808	-0.986973	1.14908	0.277659	0.999039	-4.57641	CA	no_hit
CEP170B	J3KQR7|Q9Y4F5|Q9Y4F5-2	Centrosomal protein of 170 kDa protein B OS=Homo sapiens OX=9606 GN=CEP170B PE=1 SV=1|Centrosomal protein of 170 kDa protein B OS=Homo sapiens OX=9606 GN=CEP170B PE=1 SV=4|Isoform 2 of Centrosomal protein of 170 kDa protein B OS=Homo sapiens OX=9606 GN=CEP170B	189869.0|189798.0|185522.0	8	6.29505	-0.280448	-0.546419	-1.14865	0.277829	0.999039	-4.57651	CA	no_hit
TARS2	Q9BW92	Threonine--tRNA ligase, mitochondrial OS=Homo sapiens OX=9606 GN=TARS2 PE=1 SV=1	88533.3	12	7.39154	0.257739	-0.163125	1.14787	0.278136	0.999039	-4.57668	CA	no_hit
ASAP2	O43150|O43150-2	Arf-GAP with SH3 domain, ANK repeat and PH domain-containing protein 2 OS=Homo sapiens OX=9606 GN=ASAP2 PE=1 SV=3|Isoform 2 of Arf-GAP with SH3 domain, ANK repeat and PH domain-containing protein 2 OS=Homo sapiens OX=9606 GN=ASAP2	136867.0|131898.0	6	7.23214	0.182546	-0.00787509	1.14742	0.278313	0.999039	-4.57678	CA	no_hit
FAR1	Q8WVX9	Fatty acyl-CoA reductase 1 OS=Homo sapiens OX=9606 GN=FAR1 PE=1 SV=1	68482.9	10	7.25425	0.208774	-0.123208	1.14696	0.278496	0.999039	-4.57688	CA	no_hit
TBC1D20	Q96BZ9|Q96BZ9-3	TBC1 domain family member 20 OS=Homo sapiens OX=9606 GN=TBC1D20 PE=1 SV=1|Isoform 3 of TBC1 domain family member 20 OS=Homo sapiens OX=9606 GN=TBC1D20	51168.4|53750.8	7	6.95134	0.137329	0.0780437	1.14648	0.278685	0.999039	-4.57699	CA	no_hit
RPS6KA1	E9PGT3|Q15418|Q15418-2|Q15418-4	Ribosomal protein S6 kinase OS=Homo sapiens OX=9606 GN=RPS6KA1 PE=1 SV=1|Ribosomal protein S6 kinase alpha-1 OS=Homo sapiens OX=9606 GN=RPS6KA1 PE=1 SV=2|Isoform 2 of Ribosomal protein S6 kinase alpha-1 OS=Homo sapiens OX=9606 GN=RPS6KA1|Isoform 4 of Ribosomal protein S6 kinase alpha-1 OS=Homo sapiens OX=9606 GN=RPS6KA1	99463.3|100714.0|101923.0|98892.0	10	6.86677	0.195268	-0.0674658	1.14623	0.278782	0.999039	-4.57704	CA	no_hit
RPL38	P63173	60S ribosomal protein L38 OS=Homo sapiens OX=9606 GN=RPL38 PE=1 SV=2	13137.1	3	7.86752	-0.165805	-0.617894	-1.14617	0.278807	0.999039	-4.57706	CA	no_hit
UPF1	Q92900|Q92900-2	Regulator of nonsense transcripts 1 OS=Homo sapiens OX=9606 GN=UPF1 PE=1 SV=2|Isoform 2 of Regulator of nonsense transcripts 1 OS=Homo sapiens OX=9606 GN=UPF1|Regulator of nonsense transcripts 1 OS=Homo sapiens OX=9606 GN=UPF1 PE=1 SV=2	144135.0|142826.0	39	7.7847	-0.146202	-0.100173	-1.14576	0.278966	0.999039	-4.57715	CA	no_hit
MRPL51	Q4U2R6	39S ribosomal protein L51, mitochondrial OS=Homo sapiens OX=9606 GN=MRPL51 PE=1 SV=1	18241.3	2	7.17257	0.396117	-1.00089	1.14527	0.27916	0.999039	-4.57726	CA	no_hit
ANKRD13A	Q8IZ07	Ankyrin repeat domain-containing protein 13A OS=Homo sapiens OX=9606 GN=ANKRD13A PE=1 SV=3	76493.7	4	6.81628	0.224533	0.125794	1.14493	0.279293	0.999039	-4.57733	CA	no_hit
GFM1	Q96RP9|Q96RP9-2	Elongation factor G, mitochondrial OS=Homo sapiens OX=9606 GN=GFM1 PE=1 SV=2|Isoform 2 of Elongation factor G, mitochondrial OS=Homo sapiens OX=9606 GN=GFM1|Elongation factor G, mitochondrial OS=Homo sapiens OX=9606 GN=GFM1 PE=1 SV=2	99313.1|101709.0	28	8.16767	0.144584	0.301211	1.14449	0.279469	0.999039	-4.57743	CA	no_hit
RAB23	Q9ULC3	Ras-related protein Rab-23 OS=Homo sapiens OX=9606 GN=RAB23 PE=1 SV=1	33259	8	7.21624	0.167767	0.402194	1.14448	0.279473	0.999039	-4.57743	CA	no_hit
LIN7A	O14910	Protein lin-7 homolog A OS=Homo sapiens OX=9606 GN=LIN7A PE=1 SV=2	30657.7	4	7.03165	-0.243738	0.673578	-1.14357	0.279832	0.999039	-4.57763	CA	no_hit
RABEPK	Q7Z6M1	Rab9 effector protein with kelch motifs OS=Homo sapiens OX=9606 GN=RABEPK PE=1 SV=1	46033.1	7	7.05387	0.15335	0.238346	1.14318	0.279985	0.999039	-4.57772	CA	no_hit
CAND1	Q86VP6	Cullin-associated NEDD8-dissociated protein 1 OS=Homo sapiens OX=9606 GN=CAND1 PE=1 SV=2	161727	43	8.49262	0.196062	0.190565	1.14312	0.28001	0.999039	-4.57773	CA	no_hit
VPS29	Q9UBQ0	Vacuolar protein sorting-associated protein 29 OS=Homo sapiens OX=9606 GN=VPS29 PE=1 SV=1	24618.4	8	8.38789	0.198551	0.551939	1.14182	0.280526	0.999039	-4.57802	CA	no_hit
IPO7	O95373|E9PLB2	Importin-7 OS=Homo sapiens OX=9606 GN=IPO7 PE=1 SV=1|Importin-7 (Fragment) OS=Homo sapiens OX=9606 GN=IPO7 PE=1 SV=8|Importin-7 OS=Homo sapiens OX=9606 GN=IPO7 PE=1 SV=1	136874.0|17337.2	20	8.48423	0.185109	0.160906	1.13952	0.281439	0.999039	-4.57853	CA	no_hit
ACLY	P53396|P53396-2	ATP-citrate synthase OS=Homo sapiens OX=9606 GN=ACLY PE=1 SV=3|Isoform 2 of ATP-citrate synthase OS=Homo sapiens OX=9606 GN=ACLY	143577.0|142511.0	60	9.14673	0.181853	0.281623	1.1387	0.281762	0.999039	-4.57871	CA	no_hit
PAICS	E9PBS1|P22234|P22234-2	Multifunctional protein ADE2 (Fragment) OS=Homo sapiens OX=9606 GN=PAICS PE=1 SV=1|Multifunctional protein ADE2 OS=Homo sapiens OX=9606 GN=PAICS PE=1 SV=3|Isoform 2 of Multifunctional protein ADE2 OS=Homo sapiens OX=9606 GN=PAICS	56041.3|58437.7|59620.3	23	8.53294	0.178433	0.57733	1.1385	0.281842	0.999039	-4.57875	CA	no_hit
SUN2	Q9UH99|Q9UH99-2|Q9UH99-3	SUN domain-containing protein 2 OS=Homo sapiens OX=9606 GN=SUN2 PE=1 SV=3|Isoform 2 of SUN domain-containing protein 2 OS=Homo sapiens OX=9606 GN=SUN2|Isoform 3 of SUN domain-containing protein 2 OS=Homo sapiens OX=9606 GN=SUN2	87182.2|89676.4|86541.0	8	7.00172	0.292574	-1.1234	1.13849	0.281849	0.999039	-4.57876	CA	no_hit
MTUS1	Q9ULD2|Q9ULD2-2	Microtubule-associated tumor suppressor 1 OS=Homo sapiens OX=9606 GN=MTUS1 PE=1 SV=2|Isoform 2 of Microtubule-associated tumor suppressor 1 OS=Homo sapiens OX=9606 GN=MTUS1|Isoform 2 of Microtubule-associated tumor suppressor 1 OS=Homo sapiens OX=9606 GN=MTUS1	178270.0|171017.0	24	7.58219	-0.369766	-1.14483	-1.13814	0.281986	0.999039	-4.57883	CA	no_hit
EPHX1	P07099	Epoxide hydrolase 1 OS=Homo sapiens OX=9606 GN=EPHX1 PE=1 SV=1	61965.1	18	9.02171	0.133797	0.151149	1.13813	0.28199	0.999039	-4.57884	CA	no_hit
ITGA5	P08648	Integrin alpha-5 OS=Homo sapiens OX=9606 GN=ITGA5 PE=1 SV=2	125948	6	7.11827	-0.236069	0.567024	-1.13735	0.282301	0.999039	-4.57901	CA	no_hit
CDR2L	Q86X02	Cerebellar degeneration-related protein 2-like OS=Homo sapiens OX=9606 GN=CDR2L PE=1 SV=2	61590.8	10	7.07247	-0.253812	0.494105	-1.13672	0.282551	0.999039	-4.57915	CA	no_hit
SCRN3	Q0VDG4|Q0VDG4-2	Secernin-3 OS=Homo sapiens OX=9606 GN=SCRN3 PE=1 SV=1|Isoform 2 of Secernin-3 OS=Homo sapiens OX=9606 GN=SCRN3	58095.6|56861.1	6	6.70435	0.136549	0.281445	1.13655	0.282622	0.999039	-4.57919	CA	no_hit
NCOA5	Q9HCD5	Nuclear receptor coactivator 5 OS=Homo sapiens OX=9606 GN=NCOA5 PE=1 SV=2	69983.5	11	7.41836	-0.32995	-2.32195	-1.13646	0.282656	0.999039	-4.57921	CA	no_hit
KIF22	H3BRB3|Q14807|Q14807-2	Kinesin-like protein OS=Homo sapiens OX=9606 GN=KIF22 PE=1 SV=1|Kinesin-like protein KIF22 OS=Homo sapiens OX=9606 GN=KIF22 PE=1 SV=5|Isoform 2 of Kinesin-like protein KIF22 OS=Homo sapiens OX=9606 GN=KIF22	79859.9|85479.9|78111.0	8	6.83885	-0.250916	-1.15333	-1.13557	0.28301	0.999039	-4.5794	CA	no_hit
CDC37	Q16543	Hsp90 co-chaperone Cdc37 OS=Homo sapiens OX=9606 GN=CDC37 PE=1 SV=1	57425.7	13	8.13152	0.151679	0.307532	1.13444	0.283463	0.999039	-4.57965	CA	no_hit
KIFC1	Q9BW19	Kinesin-like protein KIFC1 OS=Homo sapiens OX=9606 GN=KIFC1 PE=1 SV=2	84311.3	10	6.96303	-0.218296	-0.914588	-1.13428	0.283528	0.999039	-4.57969	CA	no_hit
C2CD5	Q86YS7|Q86YS7-2|Q86YS7-3|Q86YS7-4|Q86YS7-5	C2 domain-containing protein 5 OS=Homo sapiens OX=9606 GN=C2CD5 PE=1 SV=1|Isoform 2 of C2 domain-containing protein 5 OS=Homo sapiens OX=9606 GN=C2CD5|Isoform 3 of C2 domain-containing protein 5 OS=Homo sapiens OX=9606 GN=C2CD5|Isoform 4 of C2 domain-containing protein 5 OS=Homo sapiens OX=9606 GN=C2CD5|Isoform 5 of C2 domain-containing protein 5 OS=Homo sapiens OX=9606 GN=C2CD5|Isoform 2 of C2 d…	128039.0|132698.0|134586.0|134064.0|134475.0	10	7.02278	-0.169492	0.0236172	-1.13398	0.283645	0.999039	-4.57975	CA	no_hit
MED20	B7ZBQ3|Q9H944|Q9H944-2|A6PVP4	Mediator of RNA polymerase II transcription subunit 20 OS=Homo sapiens OX=9606 GN=MED20 PE=1 SV=1|Mediator of RNA polymerase II transcription subunit 20 OS=Homo sapiens OX=9606 GN=MED20 PE=1 SV=1|Isoform 2 of Mediator of RNA polymerase II transcription subunit 20 OS=Homo sapiens OX=9606 GN=MED20|Mediator of RNA polymerase II transcription subunit 20 (Fragment) OS=Homo sapiens OX=9606 GN=MED20 PE=…	18992.8|27008.9|16249.3|18396.5	3	6.79286	-0.483589	0.0188307	-1.13344	0.283862	0.999039	-4.57987	CA	no_hit
ERICH5	Q6P6B1	Glutamate-rich protein 5 OS=Homo sapiens OX=9606 GN=ERICH5 PE=2 SV=1	47326.5	3	6.56313	-0.311895	0.102819	-1.13251	0.284236	0.999039	-4.58008	CA	no_hit
KLC2	Q9H0B6	Kinesin light chain 2 OS=Homo sapiens OX=9606 GN=KLC2 PE=1 SV=1	82372.3	16	7.598	-0.247603	0.562271	-1.13148	0.284648	0.999039	-4.5803	CA	no_hit
AKAP8L	Q9ULX6	A-kinase anchor protein 8-like OS=Homo sapiens OX=9606 GN=AKAP8L PE=1 SV=4	84219.1	11	7.3649	-0.282492	-1.54535	-1.13125	0.28474	0.999039	-4.58035	CA	no_hit
PALLD	Q8WX93|Q8WX93-3	Palladin OS=Homo sapiens OX=9606 GN=PALLD PE=1 SV=3|Isoform 3 of Palladin OS=Homo sapiens OX=9606 GN=PALLD	172829.0|123222.0	21	7.66557	-0.226672	0.169907	-1.13125	0.28474	0.999039	-4.58035	CA	no_hit
SSB	P05455	Lupus La protein OS=Homo sapiens OX=9606 GN=SSB PE=1 SV=2	65535.9	30	8.57764	0.278701	-0.303632	1.1306	0.284999	0.999039	-4.5805	CA	no_hit
KPNA4	O00629	Importin subunit alpha-3 OS=Homo sapiens OX=9606 GN=KPNA4 PE=1 SV=1	65056.4	5	7.81619	-0.234279	-0.485409	-1.13002	0.285233	0.999039	-4.58062	CA	no_hit
OTUD7B	Q5SZ59|Q6GQQ9|Q6GQQ9-2	OTU domain containing 7B (Fragment) OS=Homo sapiens OX=9606 GN=OTUD7B PE=1 SV=1|OTU domain-containing protein 7B OS=Homo sapiens OX=9606 GN=OTUD7B PE=1 SV=1|Isoform 2 of OTU domain-containing protein 7B OS=Homo sapiens OX=9606 GN=OTUD7B|OTU domain-containing protein 7B OS=Homo sapiens OX=9606 GN=OTUD7B PE=1 SV=1|Isoform 2 of OTU domain-containing protein 7B OS=Homo sapiens OX=9606 GN=OTUD7B	52664.3|108363.0|104558.0	4	6.72949	-0.229619	0.518743	-1.12952	0.285433	0.999039	-4.58073	CA	no_hit
MED1	Q15648	Mediator of RNA polymerase II transcription subunit 1 OS=Homo sapiens OX=9606 GN=MED1 PE=1 SV=4	207673	14	7.06822	-0.320182	-0.630689	-1.12926	0.285539	0.999039	-4.58079	CA	no_hit
EEF1G	P26641	Elongation factor 1-gamma OS=Homo sapiens OX=9606 GN=EEF1G PE=1 SV=3	60163.9	22	9.14273	0.173643	0.299332	1.12901	0.28564	0.999039	-4.58085	CA	no_hit
SF3B6	Q9Y3B4	Splicing factor 3B subunit 6 OS=Homo sapiens OX=9606 GN=SF3B6 PE=1 SV=1	18340.1	4	7.44999	-0.403566	-0.830997	-1.12882	0.285714	0.999039	-4.58089	CA	no_hit
CARHSP1	Q9Y2V2	Calcium-regulated heat-stable protein 1 OS=Homo sapiens OX=9606 GN=CARHSP1 PE=1 SV=2	18239.6	2	7.34281	-0.367589	0.400513	-1.12866	0.285781	0.999039	-4.58092	CA	no_hit
BAZ1A	Q9NRL2	Bromodomain adjacent to zinc finger domain protein 1A OS=Homo sapiens OX=9606 GN=BAZ1A PE=1 SV=2	221009	27	7.60647	0.268833	-2.56601	1.12847	0.285855	0.999039	-4.58096	CA	no_hit
EPS15L1	Q9UBC2-2|M0QY01	Isoform 2 of Epidermal growth factor receptor substrate 15-like 1 OS=Homo sapiens OX=9606 GN=EPS15L1|Epidermal growth factor receptor substrate 15-like 1 (Fragment) OS=Homo sapiens OX=9606 GN=EPS15L1 PE=1 SV=1|Isoform 2 of Epidermal growth factor receptor substrate 15-like 1 OS=Homo sapiens OX=9606 GN=EPS15L1	120345.0|9236.89	18	7.23936	-0.213145	0.556296	-1.12776	0.28614	0.999039	-4.58112	CA	no_hit
HGD	Q93099	Homogentisate 1,2-dioxygenase OS=Homo sapiens OX=9606 GN=HGD PE=1 SV=2	58221	14	7.91384	0.178018	0.615608	1.12768	0.286174	0.999039	-4.58114	CA	no_hit
PRTFDC1	Q9NRG1|Q9NRG1-2	Phosphoribosyltransferase domain-containing protein 1 OS=Homo sapiens OX=9606 GN=PRTFDC1 PE=1 SV=1|Isoform 2 of Phosphoribosyltransferase domain-containing protein 1 OS=Homo sapiens OX=9606 GN=PRTFDC1|Phosphoribosyltransferase domain-containing protein 1 OS=Homo sapiens OX=9606 GN=PRTFDC1 PE=1 SV=1	30391.1|25612.7	4	7.32617	0.265514	0.0256009	1.12714	0.286393	0.999039	-4.58126	CA	no_hit
PDPR	Q8NCN5	Pyruvate dehydrogenase phosphatase regulatory subunit, mitochondrial OS=Homo sapiens OX=9606 GN=PDPR PE=1 SV=2	113237	15	7.20887	0.162831	0.157998	1.12706	0.286425	0.999039	-4.58127	CA	no_hit
PDCD2	F5H4V9|Q16342|Q16342-3	Programmed cell death protein 2 OS=Homo sapiens OX=9606 GN=PDCD2 PE=1 SV=1|Programmed cell death protein 2 OS=Homo sapiens OX=9606 GN=PDCD2 PE=1 SV=2|Isoform 3 of Programmed cell death protein 2 OS=Homo sapiens OX=9606 GN=PDCD2	38717.6|44821.9|41408.1	3	6.53581	-0.193387	0.388948	-1.127	0.286449	0.999039	-4.58129	CA	no_hit
CUL3	Q13618|Q13618-2	Cullin-3 OS=Homo sapiens OX=9606 GN=CUL3 PE=1 SV=2|Cullin-3 OS=Homo sapiens OX=9606 GN=CUL3 PE=1 SV=2|Isoform 2 of Cullin-3 OS=Homo sapiens OX=9606 GN=CUL3	107696.0|104089.0	29	7.76478	0.207474	-0.0491969	1.12677	0.28654	0.999039	-4.58134	CA	no_hit
NONO	Q15233	Non-POU domain-containing octamer-binding protein OS=Homo sapiens OX=9606 GN=NONO PE=1 SV=4	62524.9	20	8.82812	-0.628342	-2.21922	-1.12537	0.287105	0.999039	-4.58164	CA	no_hit
SCAF1	Q9H7N4	Splicing factor, arginine/serine-rich 19 OS=Homo sapiens OX=9606 GN=SCAF1 PE=1 SV=3	165063	11	7.18724	-0.227123	-3.2954	-1.12524	0.287156	0.999039	-4.58167	CA	no_hit
FRMD8	E9PS62|Q9BZ67|Q9BZ67-2|Q9BZ67-3	FERM domain-containing protein 8 (Fragment) OS=Homo sapiens OX=9606 GN=FRMD8 PE=1 SV=1|FERM domain-containing protein 8 OS=Homo sapiens OX=9606 GN=FRMD8 PE=1 SV=1|Isoform 2 of FERM domain-containing protein 8 OS=Homo sapiens OX=9606 GN=FRMD8|FERM domain-containing protein 8 OS=Homo sapiens OX=9606 GN=FRMD8 PE=1 SV=1|Isoform 2 of FERM domain-containing protein 8 OS=Homo sapiens OX=9606 GN=FRMD8|Is…	22941.0|57175.1|51094.8|52275.4	2	6.80617	0.178013	0.40264	1.12505	0.287234	0.999039	-4.58171	CA	no_hit
COQ7	H3BP28|Q99807|Q99807-2	5-demethoxyubiquinone hydroxylase, mitochondrial OS=Homo sapiens OX=9606 GN=COQ7 PE=1 SV=1|5-demethoxyubiquinone hydroxylase, mitochondrial OS=Homo sapiens OX=9606 GN=COQ7 PE=1 SV=3|5-demethoxyubiquinone hydroxylase, mitochondrial OS=Homo sapiens OX=9606 GN=COQ7 PE=1 SV=1|5-demethoxyubiquinone hydroxylase, mitochondrial OS=Homo sapiens OX=9606 GN=COQ7 PE=1 SV=3|Isoform 2 of 5-demethoxyubiquinone …	24709.1|27170.5|22997.3	5	6.89557	0.144272	0.30202	1.12464	0.287401	0.999039	-4.5818	CA	no_hit
ZNHIT6	Q9NWK9|Q9NWK9-2	Box C/D snoRNA protein 1 OS=Homo sapiens OX=9606 GN=ZNHIT6 PE=1 SV=1|Isoform 2 of Box C/D snoRNA protein 1 OS=Homo sapiens OX=9606 GN=ZNHIT6	69721.8|64684.2	6	7.10895	-0.215422	-0.413252	-1.12446	0.287474	0.999039	-4.58184	CA	no_hit
PREPL	Q4J6C6|Q4J6C6-4	Prolyl endopeptidase-like OS=Homo sapiens OX=9606 GN=PREPL PE=1 SV=1|Isoform 4 of Prolyl endopeptidase-like OS=Homo sapiens OX=9606 GN=PREPL	104008.0|88952.3	14	7.36383	0.140977	0.179116	1.12422	0.287569	0.999039	-4.5819	CA	no_hit
WDFY3	Q8IZQ1|Q8IZQ1-2	WD repeat and FYVE domain-containing protein 3 OS=Homo sapiens OX=9606 GN=WDFY3 PE=1 SV=2|Isoform 2 of WD repeat and FYVE domain-containing protein 3 OS=Homo sapiens OX=9606 GN=WDFY3	451226.0|448728.0	4	6.43644	0.279024	-0.0889401	1.12419	0.287583	0.999039	-4.5819	CA	no_hit
ADAM15	Q13444|Q13444-10|Q13444-11|Q13444-12|Q13444-2|Q13444-3|Q13444-4|Q13444-5|Q13444-6|Q13444-7|Q13444-8|Q13444-9|Q13444-13	Disintegrin and metalloproteinase domain-containing protein 15 OS=Homo sapiens OX=9606 GN=ADAM15 PE=1 SV=4|Isoform 10 of Disintegrin and metalloproteinase domain-containing protein 15 OS=Homo sapiens OX=9606 GN=ADAM15|Isoform 11 of Disintegrin and metalloproteinase domain-containing protein 15 OS=Homo sapiens OX=9606 GN=ADAM15|Isoform 12 of Disintegrin and metalloproteinase domain-containing prot…	100808.0|90054.5|60979.1|95967.0|94987.5|100680.0|97929.1|97866.1|96269.2|96141.2|93327.6|92813.0|72260.4	5	6.68009	-0.317274	0.592489	-1.124	0.287659	0.999039	-4.58195	CA	no_hit
NME3	Q13232	Nucleoside diphosphate kinase 3 OS=Homo sapiens OX=9606 GN=NME3 PE=1 SV=2	21056.3	7	7.94597	0.175153	0.143898	1.12359	0.287823	0.999039	-4.58203	CA	no_hit
SNW1	Q13573	SNW domain-containing protein 1 OS=Homo sapiens OX=9606 GN=SNW1 PE=1 SV=1	77636.5	19	7.63244	-0.382597	-1.1032	-1.12356	0.287837	0.999039	-4.58204	CA	no_hit
GOLGA5	Q8TBA6|Q8TBA6-2	Golgin subfamily A member 5 OS=Homo sapiens OX=9606 GN=GOLGA5 PE=1 SV=3|Golgin subfamily A member 5 OS=Homo sapiens OX=9606 GN=GOLGA5 PE=1 SV=3|Isoform 2 of Golgin subfamily A member 5 OS=Homo sapiens OX=9606 GN=GOLGA5	98241.2|93081.3	22	7.42966	-0.171992	0.516861	-1.12351	0.287855	0.999039	-4.58205	CA	no_hit
RNPS1	H3BMM9|H3BTC0|H3BV80|Q15287	RNA-binding protein with serine-rich domain 1 (Fragment) OS=Homo sapiens OX=9606 GN=RNPS1 PE=1 SV=1|RNA-binding protein with serine-rich domain 1 (Fragment) OS=Homo sapiens OX=9606 GN=RNPS1 PE=1 SV=1|RNA-binding protein with serine-rich domain 1 OS=Homo sapiens OX=9606 GN=RNPS1 PE=1 SV=2|RNA-binding protein with serine-rich domain 1 OS=Homo sapiens OX=9606 GN=RNPS1 PE=1 SV=1	40503.4|42679.5|30326.0|43009.7	6	7.75174	0.296583	-1.83682	1.12313	0.288011	0.999039	-4.58214	CA	no_hit
DYRK1A	A0A2R8Y6I6|A0A2R8Y6L5|Q13627|Q13627-2|Q13627-5|A0A2R8YDF3|Q13627-3|Q13627-4	Dual-specificity tyrosine-phosphorylation-regulated kinase 1A OS=Homo sapiens OX=9606 GN=DYRK1A PE=1 SV=1|Dual-specificity tyrosine-phosphorylation-regulated kinase 1A (Fragment) OS=Homo sapiens OX=9606 GN=DYRK1A PE=1 SV=1|Dual specificity tyrosine-phosphorylation-regulated kinase 1A OS=Homo sapiens OX=9606 GN=DYRK1A PE=1 SV=2|Isoform 1 of Dual specificity tyrosine-phosphorylation-regulated kinas…	93868.3|81070.7|98211.5|97184.9|78738.7|72067.8|72916.0|72388.7	3	6.50706	-0.432272	-1.01468	-1.12304	0.288045	0.999039	-4.58215	CA	no_hit
LGALS3	P17931	Galectin-3 OS=Homo sapiens OX=9606 GN=LGALS3 PE=1 SV=5	28626.7	9	8.0084	0.391129	0.794282	1.12289	0.288105	0.999039	-4.58219	CA	no_hit
PPP1R2	E7EMN6|E7EUI7|P41236	Protein phosphatase inhibitor 2 (Fragment) OS=Homo sapiens OX=9606 GN=PPP1R2 PE=1 SV=1|Protein phosphatase inhibitor 2 OS=Homo sapiens OX=9606 GN=PPP1R2 PE=1 SV=1|Protein phosphatase inhibitor 2 OS=Homo sapiens OX=9606 GN=PPP1R2 PE=1 SV=2|Protein phosphatase inhibitor 2 (Fragment) OS=Homo sapiens OX=9606 GN=PPP1R2 PE=1 SV=1|Protein phosphatase inhibitor 2 OS=Homo sapiens OX=9606 GN=PPP1R2 PE=1 SV…	23796.3|11409.1|28229.4	4	7.03751	-0.40043	0.69095	-1.12263	0.288211	0.999039	-4.58224	CA	no_hit
EHD4	Q9H223	EH domain-containing protein 4 OS=Homo sapiens OX=9606 GN=EHD4 PE=1 SV=1	73837.1	13	7.47208	0.15615	0.0086815	1.12214	0.28841	0.999039	-4.58235	CA	no_hit
ATP1B3	P54709	Sodium/potassium-transporting ATPase subunit beta-3 OS=Homo sapiens OX=9606 GN=ATP1B3 PE=1 SV=1	38831	8	7.32908	-0.456778	1.41454	-1.12193	0.288496	0.999039	-4.5824	CA	no_hit
HYPK	Q9NX55	Huntingtin-interacting protein K OS=Homo sapiens OX=9606 GN=HYPK PE=1 SV=2	17394.3	5	7.54224	-0.371177	1.01368	-1.12161	0.288627	0.999039	-4.58247	CA	no_hit
LMNB1	P20700	Lamin-B1 OS=Homo sapiens OX=9606 GN=LMNB1 PE=1 SV=2	78516.8	35	8.43979	-0.43851	-4.23311	-1.12118	0.288798	0.999039	-4.58256	CA	no_hit
TTK	P33981|P33981-2	Dual specificity protein kinase TTK OS=Homo sapiens OX=9606 GN=TTK PE=1 SV=2|Isoform 2 of Dual specificity protein kinase TTK OS=Homo sapiens OX=9606 GN=TTK	122317.0|122189.0	7	6.6482	-0.287992	0.0781489	-1.12055	0.289055	0.999039	-4.5827	CA	no_hit
PALM	O75781|O75781-2	Paralemmin-1 OS=Homo sapiens OX=9606 GN=PALM PE=1 SV=2|Paralemmin-1 OS=Homo sapiens OX=9606 GN=PALM PE=1 SV=2|Isoform 2 of Paralemmin-1 OS=Homo sapiens OX=9606 GN=PALM	49522.2|43389.7	3	6.63096	-0.187643	0.162251	-1.11996	0.289295	0.999039	-4.58283	CA	no_hit
RANBP9	Q96S59	Ran-binding protein 9 OS=Homo sapiens OX=9606 GN=RANBP9 PE=1 SV=1	86562.7	6	6.56518	-0.327131	-0.48678	-1.11967	0.289411	0.999039	-4.58289	CA	no_hit
KPNA3	O00505	Importin subunit alpha-4 OS=Homo sapiens OX=9606 GN=KPNA3 PE=1 SV=2	65893.2	2	7.36679	-0.244946	-0.635677	-1.11951	0.289477	0.999039	-4.58293	CA	no_hit
HMGB1	P09429|Q5T7C4	High mobility group protein B1 OS=Homo sapiens OX=9606 GN=HMGB1 PE=1 SV=3|High mobility group protein B1 OS=Homo sapiens OX=9606 GN=HMGB1 PE=1 SV=1	38130.1|28509.2	6	8.18952	0.55269	-0.160224	1.11844	0.289912	0.999039	-4.58316	CA	no_hit
ABHD17C	Q6PCB6|Q6PCB6-2	Alpha/beta hydrolase domain-containing protein 17C OS=Homo sapiens OX=9606 GN=ABHD17C PE=1 SV=2|Isoform 2 of Alpha/beta hydrolase domain-containing protein 17C OS=Homo sapiens OX=9606 GN=ABHD17C	38621.2|34347.1	2	6.6803	0.245492	0.395847	1.11839	0.289932	0.999039	-4.58317	CA	no_hit
SF3A2	Q15428	Splicing factor 3A subunit 2 OS=Homo sapiens OX=9606 GN=SF3A2 PE=1 SV=2	56030.9	9	7.80331	-0.323923	0.398463	-1.11771	0.290208	0.999039	-4.58332	CA	no_hit
GGA3	Q9NZ52|Q9NZ52-2	ADP-ribosylation factor-binding protein GGA3 OS=Homo sapiens OX=9606 GN=GGA3 PE=1 SV=1|Isoform Short of ADP-ribosylation factor-binding protein GGA3 OS=Homo sapiens OX=9606 GN=GGA3|ADP-ribosylation factor-binding protein GGA3 OS=Homo sapiens OX=9606 GN=GGA3 PE=1 SV=1	91803.6|86629.8	7	6.9749	-0.232882	0.383039	-1.11743	0.290324	0.999039	-4.58338	CA	no_hit
NUFIP2	Q7Z417	Nuclear fragile X mental retardation-interacting protein 2 OS=Homo sapiens OX=9606 GN=NUFIP2 PE=1 SV=1	93775.8	18	7.64559	-0.426585	-1.50011	-1.11731	0.290371	0.999039	-4.58341	CA	no_hit
C12orf29	Q8N999|Q8N999-3	Uncharacterized protein C12orf29 OS=Homo sapiens OX=9606 GN=C12orf29 PE=1 SV=2|Isoform 3 of Uncharacterized protein C12orf29 OS=Homo sapiens OX=9606 GN=C12orf29|Uncharacterized protein C12orf29 OS=Homo sapiens OX=9606 GN=C12orf29 PE=1 SV=2	47219.4|43181.1	4	7.02646	0.151544	0.385842	1.1173	0.290375	0.999039	-4.58341	CA	no_hit
GINS1	Q14691	DNA replication complex GINS protein PSF1 OS=Homo sapiens OX=9606 GN=GINS1 PE=1 SV=1	26605	8	7.22028	0.133769	0.462922	1.1172	0.290415	0.999039	-4.58343	CA	no_hit
UBL5	Q9BZL1	Ubiquitin-like protein 5 OS=Homo sapiens OX=9606 GN=UBL5 PE=1 SV=1	11393.3	5	7.26499	0.253976	0.688439	1.11702	0.29049	0.999039	-4.58347	CA	no_hit
SRSF2	J3KP15|J3QL05|Q01130|Q01130-2	Serine/arginine-rich-splicing factor 2 (Fragment) OS=Homo sapiens OX=9606 GN=SRSF2 PE=1 SV=8|Serine/arginine-rich-splicing factor 2 (Fragment) OS=Homo sapiens OX=9606 GN=SRSF2 PE=1 SV=1|Serine/arginine-rich splicing factor 2 OS=Homo sapiens OX=9606 GN=SRSF2 PE=1 SV=4|Isoform 2 of Serine/arginine-rich splicing factor 2 OS=Homo sapiens OX=9606 GN=SRSF2	16578.5|16667.7|29111.7|27789.0	6	8.51281	-0.426236	-1.0695	-1.1169	0.290538	0.999039	-4.5835	CA	no_hit
TUBB	P07437	Tubulin beta chain OS=Homo sapiens OX=9606 GN=TUBB PE=1 SV=2	54658.3	3	8.17285	-0.323596	-0.771414	-1.11661	0.290657	0.999039	-4.58356	CA	no_hit
CDK5	Q00535	Cyclin-dependent-like kinase 5 OS=Homo sapiens OX=9606 GN=CDK5 PE=1 SV=3	40736.1	10	7.47119	0.131625	0.221512	1.11644	0.290725	0.999039	-4.5836	CA	no_hit
DCTN5	H3BR94|Q9BTE1|Q9BTE1-2	Dynactin subunit 5 OS=Homo sapiens OX=9606 GN=DCTN5 PE=1 SV=1|Dynactin subunit 5 OS=Homo sapiens OX=9606 GN=DCTN5 PE=1 SV=1|Isoform 2 of Dynactin subunit 5 OS=Homo sapiens OX=9606 GN=DCTN5|Dynactin subunit 5 OS=Homo sapiens OX=9606 GN=DCTN5 PE=1 SV=1	20510.9|24334.0|20177.8	4	7.15205	0.182895	0.267942	1.11639	0.290749	0.999039	-4.58361	CA	no_hit
RAI14	Q9P0K7-4|Q9P0K7|Q9P0K7-2|Q9P0K7-3	Isoform 4 of Ankycorbin OS=Homo sapiens OX=9606 GN=RAI14|Ankycorbin OS=Homo sapiens OX=9606 GN=RAI14 PE=1 SV=2|Isoform 2 of Ankycorbin OS=Homo sapiens OX=9606 GN=RAI14|Isoform 3 of Ankycorbin OS=Homo sapiens OX=9606 GN=RAI14|Isoform 4 of Ankycorbin OS=Homo sapiens OX=9606 GN=RAI14	139103.0|143455.0|143532.0|141582.0	36	7.89802	-0.291471	-0.705579	-1.11613	0.290852	0.999039	-4.58367	CA	no_hit
FNBP1L	Q5T0N5-3|Q5T0N5-4	Isoform 3 of Formin-binding protein 1-like OS=Homo sapiens OX=9606 GN=FNBP1L|Isoform 4 of Formin-binding protein 1-like OS=Homo sapiens OX=9606 GN=FNBP1L	79445.9|79906.2	11	7.18067	0.193498	0.0239028	1.11554	0.291095	0.999039	-4.5838	CA	no_hit
TRAPPC12	Q8WVT3	Trafficking protein particle complex subunit 12 OS=Homo sapiens OX=9606 GN=TRAPPC12 PE=1 SV=3	87386.5	11	7.02205	-0.152716	0.136	-1.11507	0.291287	0.999039	-4.5839	CA	no_hit
PCNP	Q8WW12	PEST proteolytic signal-containing nuclear protein OS=Homo sapiens OX=9606 GN=PCNP PE=1 SV=2	25606	7	7.63203	-0.508778	0.604217	-1.11494	0.29134	0.999039	-4.58393	CA	no_hit
EXOC7	A0A0A0MSB8|Q9UPT5-1|Q9UPT5-6	Exocyst complex component 7 OS=Homo sapiens OX=9606 GN=EXOC7 PE=1 SV=1|Isoform 1 of Exocyst complex component 7 OS=Homo sapiens OX=9606 GN=EXOC7|Isoform 6 of Exocyst complex component 7 OS=Homo sapiens OX=9606 GN=EXOC7	96631.8|96187.8|99384.5	20	7.62612	0.206102	-0.00226566	1.11456	0.291492	0.999039	-4.58401	CA	no_hit
ATAD2	Q6PL18	ATPase family AAA domain-containing protein 2 OS=Homo sapiens OX=9606 GN=ATAD2 PE=1 SV=1	188724	9	6.7567	0.293796	-2.86674	1.1145	0.291518	0.999039	-4.58402	CA	no_hit
ZFYVE19	H3BRF9|Q96K21|Q96K21-2	Abscission/NoCut checkpoint regulator OS=Homo sapiens OX=9606 GN=ZFYVE19 PE=1 SV=1|Abscission/NoCut checkpoint regulator OS=Homo sapiens OX=9606 GN=ZFYVE19 PE=1 SV=3|Isoform 2 of Abscission/NoCut checkpoint regulator OS=Homo sapiens OX=9606 GN=ZFYVE19	55808.4|58206.5|56833.7	5	6.70503	-0.276231	0.506454	-1.11434	0.291584	0.999039	-4.58406	CA	no_hit
CDK6	Q00534	Cyclin-dependent kinase 6 OS=Homo sapiens OX=9606 GN=CDK6 PE=1 SV=1	42732.9	5	7.04549	0.175992	-0.0643854	1.11377	0.291816	0.999039	-4.58418	CA	no_hit
IKBKG	Q9Y6K9|Q9Y6K9-2|A0A087X1B1	NF-kappa-B essential modulator OS=Homo sapiens OX=9606 GN=IKBKG PE=1 SV=2|Isoform 2 of NF-kappa-B essential modulator OS=Homo sapiens OX=9606 GN=IKBKG|NF-kappa-B essential modulator OS=Homo sapiens OX=9606 GN=IKBKG PE=1 SV=1|NF-kappa-B essential modulator OS=Homo sapiens OX=9606 GN=IKBKG PE=1 SV=2|Isoform 2 of NF-kappa-B essential modulator OS=Homo sapiens OX=9606 GN=IKBKG	57920.8|66892.8|57792.8	12	7.16287	-0.361037	0.545223	-1.11202	0.292531	0.999039	-4.58456	CA	no_hit
TKT	A0A0B4J1R6|P29401|P29401-2	Transketolase OS=Homo sapiens OX=9606 GN=TKT PE=1 SV=1|Transketolase OS=Homo sapiens OX=9606 GN=TKT PE=1 SV=3|Isoform 2 of Transketolase OS=Homo sapiens OX=9606 GN=TKT	60373.9|81295.7|82231.1	39	9.50893	0.142248	0.492956	1.1119	0.292582	0.999039	-4.58459	CA	no_hit
GTF2A1	J3KNC0|P52655	Transcription initiation factor IIA subunit 1 OS=Homo sapiens OX=9606 GN=GTF2A1 PE=1 SV=1|Transcription initiation factor IIA subunit 1 OS=Homo sapiens OX=9606 GN=GTF2A1 PE=1 SV=1	7953.32|45500.2	2	6.05718	-0.614898	-0.809968	-1.11185	0.2926	0.999039	-4.5846	CA	no_hit
FHOD1	Q9Y613	FH1/FH2 domain-containing protein 1 OS=Homo sapiens OX=9606 GN=FHOD1 PE=1 SV=3	141321	23	7.43291	0.216436	-0.156173	1.11168	0.292671	0.999039	-4.58464	CA	no_hit
ROCK2	O75116	Rho-associated protein kinase 2 OS=Homo sapiens OX=9606 GN=ROCK2 PE=1 SV=4	205745	52	7.81433	0.215373	-0.00661204	1.11157	0.292718	0.999039	-4.58466	CA	no_hit
NUP214	A0A494C1F2|P35658|P35658-2|P35658-5	Nuclear pore complex protein Nup214 OS=Homo sapiens OX=9606 GN=NUP214 PE=1 SV=1|Nuclear pore complex protein Nup214 OS=Homo sapiens OX=9606 GN=NUP214 PE=1 SV=2|Isoform 2 of Nuclear pore complex protein Nup214 OS=Homo sapiens OX=9606 GN=NUP214|Isoform 5 of Nuclear pore complex protein Nup214 OS=Homo sapiens OX=9606 GN=NUP214|Nuclear pore complex protein Nup214 OS=Homo sapiens OX=9606 GN=NUP214 PE=…	241995.0|243433.0|242082.0|246240.0	35	7.86703	0.304781	-0.28873	1.11109	0.292914	0.999039	-4.58476	CA	no_hit
TGM2	P21980	Protein-glutamine gamma-glutamyltransferase 2 OS=Homo sapiens OX=9606 GN=TGM2 PE=1 SV=2	88154.7	29	8.96828	0.160231	0.282295	1.11051	0.293152	0.999039	-4.58489	CA	no_hit
PREP	P48147	Prolyl endopeptidase OS=Homo sapiens OX=9606 GN=PREP PE=1 SV=2	95858.1	24	7.79019	0.1529	0.218643	1.11028	0.293246	0.999039	-4.58494	CA	no_hit
LTA4H	P09960	Leukotriene A-4 hydrolase OS=Homo sapiens OX=9606 GN=LTA4H PE=1 SV=2	82036.8	34	8.57644	0.190728	0.163015	1.10986	0.293417	0.999039	-4.58503	CA	no_hit
[truncated: 24,750 more rows]
