# Supplementary material for: Rules for hardening influenza A virus liquid condensates
Source: bioRxiv preprint, doi:10.1101/2022.08.03.502602, version 2 (2022-11-07)
Supplement: Table S3 [file 502602_file04.xlsx]

## Sheet: DEP_SDS_different_cell_lines_DM
gene_name	protein_id	description	mw	max.qupm	average.top3	logFC	AveExpr	t	p_value	FDR_limma	B	comparison	annotation
SLC44A1	Q8WWI5|Q8WWI5-2|Q8WWI5-3	Choline transporter-like protein 1 OS=Homo sapiens OX=9606 GN=SLC44A1 PE=1 SV=1|Isoform 2 of Choline transporter-like protein 1 OS=Homo sapiens OX=9606 GN=SLC44A1|Isoform 3 of Choline transporter-like protein 1 OS=Homo sapiens OX=9606 GN=SLC44A1	85135.9|85738.5|85150.0	5	6.80586	-1.99646	25.6936	-3.33797	0.00629651	0.999947	-3.52384	CA	no_hit
WAC	Q9BTA9|Q9BTA9-5	WW domain-containing adapter protein with coiled-coil OS=Homo sapiens OX=9606 GN=WAC PE=1 SV=3|Isoform 4 of WW domain-containing adapter protein with coiled-coil OS=Homo sapiens OX=9606 GN=WAC|WW domain-containing adapter protein with coiled-coil OS=Homo sapiens OX=9606 GN=WAC PE=1 SV=3	81974.7|68936.9	6	6.9536	0.451131	27.075	2.8163	0.0162325	0.999947	-3.76817	CA	no_hit
MECP2	P51608|P51608-2	Methyl-CpG-binding protein 2 OS=Homo sapiens OX=9606 GN=MECP2 PE=1 SV=1|Isoform B of Methyl-CpG-binding protein 2 OS=Homo sapiens OX=9606 GN=MECP2	72353.2|73235.5	5	7.02276	0.424878	26.5428	2.56496	0.0256071	0.999947	-3.89342	CA	no_hit
S100A7	P31151	Protein S100-A7 OS=Homo sapiens OX=9606 GN=S100A7 PE=1 SV=4	15228.1	5	6.91822	-1.22717	25.0759	-2.49197	0.0292124	0.999947	-3.93046	CA	no_hit
ZNF207	J3QRS9|O43670|O43670-2|O43670-4|X6R4W8	BUB3-interacting and GLEBS motif-containing protein ZNF207 OS=Homo sapiens OX=9606 GN=ZNF207 PE=1 SV=1|BUB3-interacting and GLEBS motif-containing protein ZNF207 OS=Homo sapiens OX=9606 GN=ZNF207 PE=1 SV=1|Isoform 2 of BUB3-interacting and GLEBS motif-containing protein ZNF207 OS=Homo sapiens OX=9606 GN=ZNF207|Isoform 4 of BUB3-interacting and GLEBS motif-containing protein ZNF207 OS=Homo sapiens…	60758.6|58607.4|57607.0|60910.6|59411.5	6	7.85029	0.455546	28.4432	2.49085	0.029271	0.999947	-3.93102	CA	no_hit
CEP85	H7BZW2|Q6P2H3|Q6P2H3-2|Q6P2H3-4	Centrosomal protein of 85 kDa (Fragment) OS=Homo sapiens OX=9606 GN=CEP85 PE=1 SV=1|Centrosomal protein of 85 kDa OS=Homo sapiens OX=9606 GN=CEP85 PE=1 SV=1|Isoform 2 of Centrosomal protein of 85 kDa OS=Homo sapiens OX=9606 GN=CEP85|Isoform 4 of Centrosomal protein of 85 kDa OS=Homo sapiens OX=9606 GN=CEP85	61302.3|100264.0|100193.0|94512.2	5	6.60964	0.316691	25.8851	2.47639	0.0300438	0.999947	-3.93839	CA	no_hit
CMC1	Q7Z7K0	COX assembly mitochondrial protein homolog OS=Homo sapiens OX=9606 GN=CMC1 PE=1 SV=1	17386.5	2	7.59393	-0.935288	26.3967	-2.45419	0.0312684	0.999947	-3.94971	CA	no_hit
SAP130	A0A2R8YDB8|H7BXF5|Q9H0E3|Q9H0E3-3	Histone deacetylase complex subunit SAP130 OS=Homo sapiens OX=9606 GN=SAP130 PE=1 SV=1|Histone deacetylase complex subunit SAP130 OS=Homo sapiens OX=9606 GN=SAP130 PE=1 SV=1|Histone deacetylase complex subunit SAP130 OS=Homo sapiens OX=9606 GN=SAP130 PE=1 SV=1|Isoform 3 of Histone deacetylase complex subunit SAP130 OS=Homo sapiens OX=9606 GN=SAP130	125148.0|125077.0|123812.0|127757.0	3	6.4563	0.347855	24.7039	2.42311	0.033064	0.999947	-3.96559	CA	no_hit
MFHAS1	Q9Y4C4	Malignant fibrous histiocytoma-amplified sequence 1 OS=Homo sapiens OX=9606 GN=MFHAS1 PE=1 SV=2	129824	4	6.52853	-0.398056	25.9975	-2.41075	0.0338057	0.999947	-3.97192	CA	no_hit
DIS3L	Q8TF46|Q8TF46-2|Q8TF46-4	DIS3-like exonuclease 1 OS=Homo sapiens OX=9606 GN=DIS3L PE=1 SV=2|Isoform 2 of DIS3-like exonuclease 1 OS=Homo sapiens OX=9606 GN=DIS3L|Isoform 4 of DIS3-like exonuclease 1 OS=Homo sapiens OX=9606 GN=DIS3L	142271.0|123921.0|130860.0	5	6.43393	0.466247	25.4597	2.3941	0.0348305	0.999947	-3.98044	CA	no_hit
RAB11FIP1	Q6WKZ4|Q6WKZ4-3	Rab11 family-interacting protein 1 OS=Homo sapiens OX=9606 GN=RAB11FIP1 PE=1 SV=3|Rab11 family-interacting protein 1 OS=Homo sapiens OX=9606 GN=RAB11FIP1 PE=1 SV=3|Isoform 2 of Rab11 family-interacting protein 1 OS=Homo sapiens OX=9606 GN=RAB11FIP1	166077.0|91130.3	14	7.24619	0.227835	28.5	2.34529	0.0380111	0.999947	-4.0055	CA	no_hit
RBKS	Q9H477|Q9H477-2	Ribokinase OS=Homo sapiens OX=9606 GN=RBKS PE=1 SV=1|Isoform 2 of Ribokinase OS=Homo sapiens OX=9606 GN=RBKS	39140.6|36330.4	5	7.33688	-0.224796	26.801	-2.29705	0.0414277	0.999947	-4.0303	CA	no_hit
NCOR2	C9J0Q5|C9JE98|Q9Y618|Q9Y618-4|Q9Y618-5|A0A384DVL6|C9J7T7	Nuclear receptor corepressor 2 OS=Homo sapiens OX=9606 GN=NCOR2 PE=1 SV=2|Nuclear receptor corepressor 2 OS=Homo sapiens OX=9606 GN=NCOR2 PE=1 SV=1|Nuclear receptor corepressor 2 OS=Homo sapiens OX=9606 GN=NCOR2 PE=1 SV=3|Isoform 3 of Nuclear receptor corepressor 2 OS=Homo sapiens OX=9606 GN=NCOR2|Isoform 4 of Nuclear receptor corepressor 2 OS=Homo sapiens OX=9606 GN=NCOR2|Nuclear receptor corepr…	318058.0|312977.0|318644.0|316925.0|311844.0|258196.0|256477.0	24	7.32121	0.324827	29.6465	2.26222	0.0440756	0.999947	-4.04824	CA	no_hit
BAG1	J3QTA2|Q99933|Q99933-2|Q99933-3|Q99933-4	BAG family molecular chaperone regulator 1 OS=Homo sapiens OX=9606 GN=BAG1 PE=1 SV=1|BAG family molecular chaperone regulator 1 OS=Homo sapiens OX=9606 GN=BAG1 PE=1 SV=4|Isoform 2 of BAG family molecular chaperone regulator 1 OS=Homo sapiens OX=9606 GN=BAG1|Isoform 3 of BAG family molecular chaperone regulator 1 OS=Homo sapiens OX=9606 GN=BAG1|Isoform 4 of BAG family molecular chaperone regulator…	46570.3|46588.3|41347.5|38931.2|32893.1	4	6.93412	-0.217733	26.9594	-2.25966	0.0442764	0.999947	-4.04956	CA	no_hit
MRPL2	Q5T653	39S ribosomal protein L2, mitochondrial OS=Homo sapiens OX=9606 GN=MRPL2 PE=1 SV=2	38736.3	6	7.53697	0.25392	28.2272	2.22104	0.0474156	0.999947	-4.06946	CA	no_hit
DPY30	Q9C005	Protein dpy-30 homolog OS=Homo sapiens OX=9606 GN=DPY30 PE=1 SV=1	13372.3	3	7.34923	0.749142	26.9993	2.21442	0.0479742	0.999947	-4.07288	CA	no_hit
GORASP1	Q9BQQ3	Golgi reassembly-stacking protein 1 OS=Homo sapiens OX=9606 GN=GORASP1 PE=1 SV=3	50027.9	3	6.64942	0.201255	26.0362	2.1944	0.0497033	0.999947	-4.0832	CA	no_hit
AHNAK2	Q8IVF2-3|Q8IVF2	Isoform 3 of Protein AHNAK2 OS=Homo sapiens OX=9606 GN=AHNAK2|Protein AHNAK2 OS=Homo sapiens OX=9606 GN=AHNAK2 PE=1 SV=2|Isoform 3 of Protein AHNAK2 OS=Homo sapiens OX=9606 GN=AHNAK2	787906.0|799299.0	118	8.50749	0.254394	32.9784	2.18026	0.05096	0.999947	-4.09049	CA	no_hit
BAG3	O95817	BAG family molecular chaperone regulator 3 OS=Homo sapiens OX=9606 GN=BAG3 PE=1 SV=3	70245.7	22	7.83474	0.515183	29.9803	2.10394	0.0582776	0.999947	-4.12983	CA	no_hit
PARVB	Q9HBI1	Beta-parvin OS=Homo sapiens OX=9606 GN=PARVB PE=1 SV=1	50567.1	5	6.78045	-0.275241	26.7217	-2.07997	0.0607728	0.999947	-4.14217	CA	no_hit
SUFU	Q9UMX1	Suppressor of fused homolog OS=Homo sapiens OX=9606 GN=SUFU PE=1 SV=2	58818.2	3	6.16702	-0.196434	23.8986	-2.07358	0.0614549	0.999947	-4.14545	CA	no_hit
FIG4	Q92562	Polyphosphoinositide phosphatase OS=Homo sapiens OX=9606 GN=FIG4 PE=1 SV=1	119882	4	6.35237	-0.168832	25.1131	-2.06372	0.062522	0.999947	-4.15053	CA	no_hit
PPP1R12C	K7EL81|Q9BZL4-3|Q9BZL4|Q9BZL4-2|Q9BZL4-4	Protein phosphatase 1 regulatory subunit 12C (Fragment) OS=Homo sapiens OX=9606 GN=PPP1R12C PE=1 SV=1|Isoform 3 of Protein phosphatase 1 regulatory subunit 12C OS=Homo sapiens OX=9606 GN=PPP1R12C|Protein phosphatase 1 regulatory subunit 12C OS=Homo sapiens OX=9606 GN=PPP1R12C PE=1 SV=1|Isoform 2 of Protein phosphatase 1 regulatory subunit 12C OS=Homo sapiens OX=9606 GN=PPP1R12C|Isoform 3 of Prote…	88932.3|93300.6|93499.6|85639.5|93428.6	11	6.77887	0.370025	27.2105	2.05041	0.0639888	0.999947	-4.15737	CA	no_hit
SMARCD1	Q96GM5|Q96GM5-2	SWI/SNF-related matrix-associated actin-dependent regulator of chromatin subfamily D member 1 OS=Homo sapiens OX=9606 GN=SMARCD1 PE=1 SV=2|Isoform 2 of SWI/SNF-related matrix-associated actin-dependent regulator of chromatin subfamily D member 1 OS=Homo sapiens OX=9606 GN=SMARCD1	68215.6|62619.7	5	6.97013	0.300065	26.4973	2.04187	0.0649475	0.999947	-4.16176	CA	no_hit
ARPC1A	Q92747	Actin-related protein 2/3 complex subunit 1A OS=Homo sapiens OX=9606 GN=ARPC1A PE=2 SV=2	49413.9	2	6.74615	-0.236433	26.0834	-2.03251	0.0660128	0.999947	-4.16657	CA	no_hit
TRAPPC13	A5PLN9|A5PLN9-2|A5PLN9-4|A5PLN9-5	Trafficking protein particle complex subunit 13 OS=Homo sapiens OX=9606 GN=TRAPPC13 PE=1 SV=2|Isoform 2 of Trafficking protein particle complex subunit 13 OS=Homo sapiens OX=9606 GN=TRAPPC13|Isoform 3 of Trafficking protein particle complex subunit 13 OS=Homo sapiens OX=9606 GN=TRAPPC13|Isoform 4 of Trafficking protein particle complex subunit 13 OS=Homo sapiens OX=9606 GN=TRAPPC13	54782.9|54194.6|54281.7|54869.9	6	7.19119	-0.207692	27.5867	-2.02629	0.0667308	0.999947	-4.16976	CA	no_hit
TNFAIP8	D6RCM8|O95379|O95379-2|O95379-3|O95379-4	Tumor necrosis factor alpha-induced protein 8 OS=Homo sapiens OX=9606 GN=TNFAIP8 PE=1 SV=1|Tumor necrosis factor alpha-induced protein 8 OS=Homo sapiens OX=9606 GN=TNFAIP8 PE=1 SV=1|Isoform 2 of Tumor necrosis factor alpha-induced protein 8 OS=Homo sapiens OX=9606 GN=TNFAIP8|Isoform 3 of Tumor necrosis factor alpha-induced protein 8 OS=Homo sapiens OX=9606 GN=TNFAIP8|Isoform 4 of Tumor necrosis f…	29858.7|29244.1|27984.5|27814.4|30986.2	5	7.22405	-0.252704	27.586	-2.00315	0.0694635	0.999947	-4.18164	CA	no_hit
SF1	Q15637-2|Q15637-5|Q15637-6|Q15637|Q15637-3|Q15637-4	Isoform 2 of Splicing factor 1 OS=Homo sapiens OX=9606 GN=SF1|Isoform 5 of Splicing factor 1 OS=Homo sapiens OX=9606 GN=SF1|Isoform 6 of Splicing factor 1 OS=Homo sapiens OX=9606 GN=SF1|Splicing factor 1 OS=Homo sapiens OX=9606 GN=SF1 PE=1 SV=4|Isoform 2 of Splicing factor 1 OS=Homo sapiens OX=9606 GN=SF1|Isoform 3 of Splicing factor 1 OS=Homo sapiens OX=9606 GN=SF1|Isoform 4 of Splicing factor 1…	77335.1|81060.5|71565.5|76727.6|76093.8|68115.6	13	7.81271	0.267625	29.0081	2.00098	0.0697243	0.999947	-4.18275	CA	no_hit
HSPA6	P17066	Heat shock 70 kDa protein 6 OS=Homo sapiens OX=9606 GN=HSPA6 PE=1 SV=2	83304.5	15	7.56423	0.211204	29.1398	1.98414	0.0717858	0.999947	-4.19138	CA	no_hit
LGALSL	Q3ZCW2	Galectin-related protein OS=Homo sapiens OX=9606 GN=LGALSL PE=1 SV=2	21331.2	4	6.68426	-0.209313	24.3834	-1.97646	0.072745	0.999947	-4.19531	CA	no_hit
MEF2D	Q14814|Q14814-4	Myocyte-specific enhancer factor 2D OS=Homo sapiens OX=9606 GN=MEF2D PE=1 SV=1|Isoform MEF2DA0 of Myocyte-specific enhancer factor 2D OS=Homo sapiens OX=9606 GN=MEF2D	61911.4|61088.0	4	6.73149	0.475858	25.7447	1.96801	0.0738127	0.999947	-4.19963	CA	no_hit
FLYWCH2	I3L1Y9|Q96CP2	FLYWCH family member 2 OS=Homo sapiens OX=9606 GN=FLYWCH2 PE=1 SV=1|FLYWCH family member 2 OS=Homo sapiens OX=9606 GN=FLYWCH2 PE=1 SV=1	18997.7|18319.1	2	6.81153	0.391683	24.0268	1.96218	0.0745589	0.999947	-4.20261	CA	no_hit
A2M	P01023	Alpha-2-macroglobulin OS=Homo sapiens OX=9606 GN=A2M PE=1 SV=3	191688	8	7.58195	-0.328024	28.0391	-1.9558	0.075383	0.999947	-4.20588	CA	no_hit
MUC5B	Q9HC84	Mucin-5B OS=Homo sapiens OX=9606 GN=MUC5B PE=1 SV=3	641396	20	7.24351	0.677847	27.7491	1.93489	0.0781419	0.999947	-4.21655	CA	no_hit
MAPK9	P45984|P45984-2|P45984-3|P45984-4	Mitogen-activated protein kinase 9 OS=Homo sapiens OX=9606 GN=MAPK9 PE=1 SV=2|Isoform Alpha-1 of Mitogen-activated protein kinase 9 OS=Homo sapiens OX=9606 GN=MAPK9|Isoform Beta-1 of Mitogen-activated protein kinase 9 OS=Homo sapiens OX=9606 GN=MAPK9|Isoform Beta-2 of Mitogen-activated protein kinase 9 OS=Homo sapiens OX=9606 GN=MAPK9	57196.1|53053.3|53168.4|57311.2	3	6.8955	-0.226676	24.634	-1.93195	0.0785378	0.999947	-4.21805	CA	no_hit
GNB1L	Q9BYB4|Q9BYB4-2	Guanine nucleotide-binding protein subunit beta-like protein 1 OS=Homo sapiens OX=9606 GN=GNB1L PE=1 SV=2|Isoform 2 of Guanine nucleotide-binding protein subunit beta-like protein 1 OS=Homo sapiens OX=9606 GN=GNB1L|Guanine nucleotide-binding protein subunit beta-like protein 1 OS=Homo sapiens OX=9606 GN=GNB1L PE=1 SV=2	39321.4|25334.0	4	6.66756	-0.186209	26.2046	-1.93011	0.0787867	0.999947	-4.21899	CA	no_hit
CSTF2T	Q9H0L4	Cleavage stimulation factor subunit 2 tau variant OS=Homo sapiens OX=9606 GN=CSTF2T PE=1 SV=1	69490.9	3	7.08209	0.253306	26.3816	1.91945	0.0802396	0.999947	-4.22442	CA	no_hit
NEP	P03508	Nuclear export protein OS=Influenza A virus (strain A/Puerto Rico/8/1934 H1N1) OX=211044 GN=NEP PE=1 SV=1	16196.5	6	8.91584	-0.214101	30.1737	-1.9131	0.0811166	0.999947	-4.22765	CA	no_hit
CPTP	Q5TA50	Ceramide-1-phosphate transfer protein OS=Homo sapiens OX=9606 GN=CPTP PE=1 SV=1	26707.1	3	6.3047	-0.305615	23.5632	-1.90316	0.0825084	0.999947	-4.23271	CA	no_hit
EIPR1	A8MUM1|Q53HC9	EARP and GARP complex-interacting protein 1 OS=Homo sapiens OX=9606 GN=EIPR1 PE=1 SV=2|EARP and GARP complex-interacting protein 1 OS=Homo sapiens OX=9606 GN=EIPR1 PE=1 SV=2	51728.0|48595.4	4	6.95109	-0.248234	25.8149	-1.89626	0.0834881	0.999947	-4.23622	CA	no_hit
STK38L	Q9Y2H1	Serine/threonine-protein kinase 38-like OS=Homo sapiens OX=9606 GN=STK38L PE=1 SV=3	65756.4	4	6.91017	-0.218111	25.8907	-1.89058	0.0843005	0.999947	-4.2391	CA	no_hit
CCDC6	Q16204	Coiled-coil domain-containing protein 6 OS=Homo sapiens OX=9606 GN=CCDC6 PE=1 SV=2	63163.5	18	7.78909	0.284504	29.338	1.88789	0.0846897	0.999947	-4.24047	CA	no_hit
PRR12	Q9ULL5|Q9ULL5-2|A0A3Q5ADB5	Proline-rich protein 12 OS=Homo sapiens OX=9606 GN=PRR12 PE=1 SV=3|Isoform 2 of Proline-rich protein 12 OS=Homo sapiens OX=9606 GN=PRR12|Proline-rich protein 12 OS=Homo sapiens OX=9606 GN=PRR12 PE=1 SV=1|Proline-rich protein 12 OS=Homo sapiens OX=9606 GN=PRR12 PE=1 SV=3|Isoform 2 of Proline-rich protein 12 OS=Homo sapiens OX=9606 GN=PRR12	241696.0|231801.0|154076.0	3	6.29826	0.299678	25.0747	1.86637	0.087851	0.999947	-4.25138	CA	no_hit
GOLGA2	A0A2Q2TH77|Q08379	Golgin subfamily A member 2 OS=Homo sapiens OX=9606 GN=GOLGA2 PE=1 SV=1|Golgin subfamily A member 2 OS=Homo sapiens OX=9606 GN=GOLGA2 PE=1 SV=3	129557.0|130984.0	16	7.33594	0.227013	28.6088	1.86568	0.0879546	0.999947	-4.25173	CA	no_hit
DCD	P81605	Dermcidin OS=Homo sapiens OX=9606 GN=DCD PE=1 SV=2	14432.9	5	7.82177	-0.899938	27.5942	-1.8643	0.0881607	0.999947	-4.25243	CA	no_hit
LCN1	P31025	Lipocalin-1 OS=Homo sapiens OX=9606 GN=LCN1 PE=1 SV=1	23059.4	2	6.7827	-2.62382	25.3166	-1.86358	0.08827	0.999947	-4.2528	CA	no_hit
ZNF318	Q5VUA4	Zinc finger protein 318 OS=Homo sapiens OX=9606 GN=ZNF318 PE=1 SV=2	304023	2	6.37973	0.253057	24.3356	1.86207	0.0884964	0.999947	-4.25356	CA	no_hit
TRIM24	O15164|O15164-2	Transcription intermediary factor 1-alpha OS=Homo sapiens OX=9606 GN=TRIM24 PE=1 SV=3|Isoform Short of Transcription intermediary factor 1-alpha OS=Homo sapiens OX=9606 GN=TRIM24	138774.0|134963.0	7	6.64431	0.278288	26.3079	1.86008	0.088796	0.999947	-4.25457	CA	no_hit
MRPL45	A0A087WU62|A0A087X2D5|A0A0G2JMS5|Q9BRJ2	39S ribosomal protein L45, mitochondrial OS=Homo sapiens OX=9606 GN=MRPL45 PE=1 SV=1|39S ribosomal protein L45, mitochondrial OS=Homo sapiens OX=9606 GN=MRPL45 PE=1 SV=1|39S ribosomal protein L45, mitochondrial OS=Homo sapiens OX=9606 GN=MRPL45 PE=1 SV=1|39S ribosomal protein L45, mitochondrial OS=Homo sapiens OX=9606 GN=MRPL45 PE=1 SV=2|39S ribosomal protein L45, mitochondrial OS=Homo sapiens OX…	36249.9|42854.2|36309.9|42914.2	10	7.49366	0.20177	28.8272	1.85972	0.088851	0.999947	-4.25475	CA	no_hit
NCAP	P03466	Nucleoprotein OS=Influenza A virus (strain A/Puerto Rico/8/1934 H1N1) OX=211044 GN=NCAP PE=1 SV=2	62904.4	40	9.90972	0.47619	35.4377	1.85941	0.0888978	0.999947	-4.25491	CA	no_hit
USP48	Q86UV5|Q86UV5-8	Ubiquitin carboxyl-terminal hydrolase 48 OS=Homo sapiens OX=9606 GN=USP48 PE=1 SV=1|Ubiquitin carboxyl-terminal hydrolase 48 OS=Homo sapiens OX=9606 GN=USP48 PE=1 SV=1|Isoform 8 of Ubiquitin carboxyl-terminal hydrolase 48 OS=Homo sapiens OX=9606 GN=USP48	146619.0|148416.0	14	7.03008	-0.186759	28.4669	-1.85878	0.088992	0.999947	-4.25523	CA	no_hit
GTF2A1	J3KNC0|P52655	Transcription initiation factor IIA subunit 1 OS=Homo sapiens OX=9606 GN=GTF2A1 PE=1 SV=1|Transcription initiation factor IIA subunit 1 OS=Homo sapiens OX=9606 GN=GTF2A1 PE=1 SV=1	7953.32|45500.2	2	6.05718	0.649473	24.8112	1.84611	0.0909272	0.999947	-4.26163	CA	no_hit
TAF6	J3KR72|P49848|P49848-3|P49848-4|P49848-2	Transcription initiation factor TFIID subunit 6 OS=Homo sapiens OX=9606 GN=TAF6 PE=1 SV=1|Transcription initiation factor TFIID subunit 6 OS=Homo sapiens OX=9606 GN=TAF6 PE=1 SV=1|Isoform 3 of Transcription initiation factor TFIID subunit 6 OS=Homo sapiens OX=9606 GN=TAF6|Isoform 4 of Transcription initiation factor TFIID subunit 6 OS=Homo sapiens OX=9606 GN=TAF6|Transcription initiation factor T…	92778.2|86026.8|91016.5|84535.0|84899.2	10	6.561	0.278993	26.9575	1.84574	0.0909838	0.999947	-4.26182	CA	no_hit
BEND3	Q5T5X7	BEN domain-containing protein 3 OS=Homo sapiens OX=9606 GN=BEND3 PE=1 SV=1	110766	3	6.17018	0.29145	24.2347	1.84274	0.091449	0.999947	-4.26334	CA	no_hit
HAUS8	Q9BT25|Q9BT25-3	HAUS augmin-like complex subunit 8 OS=Homo sapiens OX=9606 GN=HAUS8 PE=1 SV=3|Isoform 3 of HAUS augmin-like complex subunit 8 OS=Homo sapiens OX=9606 GN=HAUS8	55895.5|55824.4	3	6.51727	0.261056	25.9045	1.83995	0.0918817	0.999947	-4.26475	CA	no_hit
MPP5	Q8N3R9|Q8N3R9-2	MAGUK p55 subfamily member 5 OS=Homo sapiens OX=9606 GN=MPP5 PE=1 SV=3|Isoform 2 of MAGUK p55 subfamily member 5 OS=Homo sapiens OX=9606 GN=MPP5|MAGUK p55 subfamily member 5 OS=Homo sapiens OX=9606 GN=MPP5 PE=1 SV=3	93045.2|88567.1	16	7.39546	0.223861	28.7332	1.8333	0.0929223	0.999947	-4.2681	CA	no_hit
VPS36	A0A3B3ISW7|Q86VN1	Vacuolar protein-sorting-associated protein 36 OS=Homo sapiens OX=9606 GN=VPS36 PE=1 SV=1|Vacuolar protein-sorting-associated protein 36 OS=Homo sapiens OX=9606 GN=VPS36 PE=1 SV=1|Vacuolar protein-sorting-associated protein 36 OS=Homo sapiens OX=9606 GN=VPS36 PE=1 SV=1	44922.7|52895.9	9	7.2824	-0.187013	27.445	-1.81934	0.0951412	0.999947	-4.27514	CA	no_hit
ZNF330	Q9Y3S2	Zinc finger protein 330 OS=Homo sapiens OX=9606 GN=ZNF330 PE=1 SV=1	46044.5	4	6.74622	-0.215828	25.0279	-1.81848	0.0952793	0.999947	-4.27557	CA	no_hit
RMND5A	Q9H871	E3 ubiquitin-protein transferase RMND5A OS=Homo sapiens OX=9606 GN=RMND5A PE=1 SV=1	51816.3	4	6.65081	0.175964	25.63	1.80926	0.0967745	0.999947	-4.28021	CA	no_hit
HEXIM1	O94992	Protein HEXIM1 OS=Homo sapiens OX=9606 GN=HEXIM1 PE=1 SV=1	47880.4	9	7.99463	0.2176	29.2556	1.80669	0.0971935	0.999947	-4.2815	CA	no_hit
NUSAP1	Q9BXS6-4|Q9BXS6-6|Q9BXS6|Q9BXS6-2|Q9BXS6-3|Q9BXS6-5|Q9BXS6-7	Isoform 4 of Nucleolar and spindle-associated protein 1 OS=Homo sapiens OX=9606 GN=NUSAP1|Isoform 6 of Nucleolar and spindle-associated protein 1 OS=Homo sapiens OX=9606 GN=NUSAP1|Nucleolar and spindle-associated protein 1 OS=Homo sapiens OX=9606 GN=NUSAP1 PE=1 SV=1|Isoform 2 of Nucleolar and spindle-associated protein 1 OS=Homo sapiens OX=9606 GN=NUSAP1|Isoform 3 of Nucleolar and spindle-associa…	63835.0|63963.1|66020.1|65892.1|65764.0|55882.2	8	7.09597	0.2455	27.8942	1.80544	0.0973986	0.999947	-4.28213	CA	no_hit
SMARCC2	F8VXC8|Q8TAQ2-2|Q8TAQ2-3	SWI/SNF complex subunit SMARCC2 OS=Homo sapiens OX=9606 GN=SMARCC2 PE=1 SV=1|Isoform 2 of SWI/SNF complex subunit SMARCC2 OS=Homo sapiens OX=9606 GN=SMARCC2|Isoform 3 of SWI/SNF complex subunit SMARCC2 OS=Homo sapiens OX=9606 GN=SMARCC2	166007.0|154671.0|156753.0	21	7.79042	0.331013	30.1655	1.79335	0.0994017	0.999947	-4.2882	CA	no_hit
SMG5	Q9UPR3	Protein SMG5 OS=Homo sapiens OX=9606 GN=SMG5 PE=1 SV=3	130966	3	6.46845	-0.276384	24.2476	-1.78601	0.100637	0.999947	-4.29188	CA	no_hit
MSN	P26038	Moesin OS=Homo sapiens OX=9606 GN=MSN PE=1 SV=3	86752.7	31	8.97056	-0.230672	32.0924	-1.78476	0.100849	0.999947	-4.29251	CA	no_hit
BRD4	O60885	Bromodomain-containing protein 4 OS=Homo sapiens OX=9606 GN=BRD4 PE=1 SV=2	186956	7	6.89128	0.295075	27.0277	1.78139	0.101421	0.999947	-4.29419	CA	no_hit
MBD2	Q9UBB5	Methyl-CpG-binding domain protein 2 OS=Homo sapiens OX=9606 GN=MBD2 PE=1 SV=1	51783.6	4	6.74441	0.323511	26.7699	1.7812	0.101452	0.999947	-4.29429	CA	no_hit
MUC5AC	P98088	Mucin-5AC OS=Homo sapiens OX=9606 GN=MUC5AC PE=1 SV=4	639685	42	8.10258	1.0073	29.3966	1.7786	0.101896	0.999947	-4.29559	CA	no_hit
ARL6	Q9H0F7|Q9H0F7-2|A0A0J9YXT0	ADP-ribosylation factor-like protein 6 OS=Homo sapiens OX=9606 GN=ARL6 PE=1 SV=1|Isoform 2 of ADP-ribosylation factor-like protein 6 OS=Homo sapiens OX=9606 GN=ARL6|ADP-ribosylation factor-like protein 6 (Fragment) OS=Homo sapiens OX=9606 GN=ARL6 PE=1 SV=1|ADP-ribosylation factor-like protein 6 OS=Homo sapiens OX=9606 GN=ARL6 PE=1 SV=1|Isoform 2 of ADP-ribosylation factor-like protein 6 OS=Homo s…	26426.7|27650.3|20800.2	4	6.83061	-0.212499	26.5391	-1.75649	0.10574	0.999947	-4.30663	CA	no_hit
SLBP	E7EUV9|F8W8D3|H0YAE8|Q14493|H7C4H8|Q14493-2	Histone RNA hairpin-binding protein OS=Homo sapiens OX=9606 GN=SLBP PE=1 SV=1|Histone RNA hairpin-binding protein OS=Homo sapiens OX=9606 GN=SLBP PE=1 SV=1|Histone RNA hairpin-binding protein (Fragment) OS=Homo sapiens OX=9606 GN=SLBP PE=1 SV=1|Histone RNA hairpin-binding protein OS=Homo sapiens OX=9606 GN=SLBP PE=1 SV=1|Histone RNA hairpin-binding protein OS=Homo sapiens OX=9606 GN=SLBP PE=1 SV=…	32078.6|37531.2|30843.1|36722.8|25872.9|31830.3	3	6.57572	0.154764	25.7134	1.75453	0.106088	0.999947	-4.30761	CA	no_hit
TP53BP2	Q13625|Q13625-2|Q13625-3	Apoptosis-stimulating of p53 protein 2 OS=Homo sapiens OX=9606 GN=TP53BP2 PE=1 SV=2|Isoform 2 of Apoptosis-stimulating of p53 protein 2 OS=Homo sapiens OX=9606 GN=TP53BP2|Isoform 3 of Apoptosis-stimulating of p53 protein 2 OS=Homo sapiens OX=9606 GN=TP53BP2	147213.0|131592.0|148223.0	6	6.58023	0.251936	26.3283	1.75353	0.106265	0.999947	-4.30811	CA	no_hit
ACOT13	Q9NPJ3|Q9NPJ3-2	Acyl-coenzyme A thioesterase 13 OS=Homo sapiens OX=9606 GN=ACOT13 PE=1 SV=1|Isoform 2 of Acyl-coenzyme A thioesterase 13 OS=Homo sapiens OX=9606 GN=ACOT13	18411.2|15210.4	4	7.48071	0.193577	28.1887	1.74386	0.107995	0.999947	-4.31293	CA	no_hit
AFG1L	Q8WV93	AFG1-like ATPase OS=Homo sapiens OX=9606 GN=AFG1L PE=1 SV=2	65171.8	4	7.30053	-0.200023	26.8457	-1.73758	0.109131	0.999947	-4.31605	CA	no_hit
MTMR6	Q9Y217	Myotubularin-related protein 6 OS=Homo sapiens OX=9606 GN=MTMR6 PE=1 SV=3	86162.6	10	6.98515	-0.21848	27.3096	-1.73172	0.110202	0.999947	-4.31896	CA	no_hit
EIF4A2	Q14240|Q14240-2	Eukaryotic initiation factor 4A-II OS=Homo sapiens OX=9606 GN=EIF4A2 PE=1 SV=2|Isoform 2 of Eukaryotic initiation factor 4A-II OS=Homo sapiens OX=9606 GN=EIF4A2	53293.4|53380.4	8	7.77287	-0.192287	28.5231	-1.73128	0.110283	0.999947	-4.31918	CA	no_hit
MED15	Q96RN5|Q96RN5-2|Q96RN5-3	Mediator of RNA polymerase II transcription subunit 15 OS=Homo sapiens OX=9606 GN=MED15 PE=1 SV=2|Isoform 2 of Mediator of RNA polymerase II transcription subunit 15 OS=Homo sapiens OX=9606 GN=MED15|Isoform 3 of Mediator of RNA polymerase II transcription subunit 15 OS=Homo sapiens OX=9606 GN=MED15	96281.4|92111.2|85462.0	6	6.85743	0.462477	27.0146	1.73088	0.110357	0.999947	-4.31938	CA	no_hit
ASNS	P08243|P08243-2	Asparagine synthetase [glutamine-hydrolyzing] OS=Homo sapiens OX=9606 GN=ASNS PE=1 SV=4|Isoform 2 of Asparagine synthetase [glutamine-hydrolyzing] OS=Homo sapiens OX=9606 GN=ASNS	76762.9|74391.9	21	8.20727	-0.197762	30.6058	-1.73058	0.110412	0.999947	-4.31953	CA	no_hit
PRRC2A	P48634	Protein PRRC2A OS=Homo sapiens OX=9606 GN=PRRC2A PE=1 SV=3	258688	16	7.42893	0.287831	28.8505	1.73039	0.110447	0.999947	-4.31963	CA	no_hit
NME6	A0A0C4DG91|A0A2R8Y547|A0A2R8Y7V2|C9J9V6|C9JQB1|O75414|O75414-2	Nucleoside diphosphate kinase OS=Homo sapiens OX=9606 GN=NME6 PE=1 SV=1|Nucleoside diphosphate kinase OS=Homo sapiens OX=9606 GN=NME6 PE=1 SV=1|Nucleoside diphosphate kinase OS=Homo sapiens OX=9606 GN=NME6 PE=1 SV=1|Nucleoside diphosphate kinase (Fragment) OS=Homo sapiens OX=9606 GN=NME6 PE=1 SV=1|Nucleoside diphosphate kinase OS=Homo sapiens OX=9606 GN=NME6 PE=1 SV=1|Nucleoside diphosphate kinas…	23377.1|9638.58|12903.4|21436.2|16957.4|22516.7|14585.5	2	6.60055	-0.174832	25.0255	-1.72734	0.111009	0.999947	-4.32114	CA	no_hit
PAXIP1	Q6ZW49|Q6ZW49-1|Q6ZW49-2	PAX-interacting protein 1 OS=Homo sapiens OX=9606 GN=PAXIP1 PE=1 SV=2|Isoform 2 of PAX-interacting protein 1 OS=Homo sapiens OX=9606 GN=PAXIP1|Isoform 3 of PAX-interacting protein 1 OS=Homo sapiens OX=9606 GN=PAXIP1|PAX-interacting protein 1 OS=Homo sapiens OX=9606 GN=PAXIP1 PE=1 SV=2	140829.0|135963.0|107208.0	4	6.55411	0.252712	25.3483	1.72348	0.111724	0.999947	-4.32306	CA	no_hit
RPIA	P49247	Ribose-5-phosphate isomerase OS=Homo sapiens OX=9606 GN=RPIA PE=1 SV=3	38096.2	4	7.11911	-0.149586	26.7327	-1.71904	0.112552	0.999947	-4.32526	CA	no_hit
ISG20	H0YMM4|Q96AZ6	Interferon-stimulated gene 20 kDa protein (Fragment) OS=Homo sapiens OX=9606 GN=ISG20 PE=1 SV=1|Interferon-stimulated gene 20 kDa protein OS=Homo sapiens OX=9606 GN=ISG20 PE=1 SV=2	18814.8|22651.1	5	7.0058	-0.167382	26.4087	-1.7126	0.11376	0.999947	-4.32844	CA	no_hit
SCEL	O95171|O95171-2|O95171-3	Sciellin OS=Homo sapiens OX=9606 GN=SCEL PE=1 SV=2|Isoform 2 of Sciellin OS=Homo sapiens OX=9606 GN=SCEL|Isoform 3 of Sciellin OS=Homo sapiens OX=9606 GN=SCEL|Isoform 2 of Sciellin OS=Homo sapiens OX=9606 GN=SCEL	97182.6|94350.0|91260.4	14	7.12772	0.316538	28.0781	1.70779	0.114673	0.999947	-4.33083	CA	no_hit
VPS72	A0A1W2PPT2|Q15906|Q15906-2	Vacuolar protein sorting-associated protein 72 homolog OS=Homo sapiens OX=9606 GN=VPS72 PE=1 SV=1|Vacuolar protein sorting-associated protein 72 homolog OS=Homo sapiens OX=9606 GN=VPS72 PE=1 SV=1|Isoform 2 of Vacuolar protein sorting-associated protein 72 homolog OS=Homo sapiens OX=9606 GN=VPS72|Vacuolar protein sorting-associated protein 72 homolog OS=Homo sapiens OX=9606 GN=VPS72 PE=1 SV=1|Isof…	26202.6|48098.7|49408.4	5	6.50467	0.245944	26.1602	1.70434	0.115329	0.999947	-4.33253	CA	no_hit
RBSN	Q9H1K0	Rabenosyn-5 OS=Homo sapiens OX=9606 GN=RBSN PE=1 SV=2	103911	5	6.37425	0.285165	24.0302	1.70264	0.115655	0.999947	-4.33337	CA	no_hit
RABEPK	Q7Z6M1	Rab9 effector protein with kelch motifs OS=Homo sapiens OX=9606 GN=RABEPK PE=1 SV=1	46033.1	7	7.05387	-0.155725	27.5566	-1.69903	0.116349	0.999947	-4.33515	CA	no_hit
MTMR9	Q96QG7	Myotubularin-related protein 9 OS=Homo sapiens OX=9606 GN=MTMR9 PE=1 SV=1	72071.8	6	6.88749	-0.199355	26.0877	-1.69679	0.116781	0.999947	-4.33626	CA	no_hit
BCAT1	P54687|P54687-4|P54687-5	Branched-chain-amino-acid aminotransferase, cytosolic OS=Homo sapiens OX=9606 GN=BCAT1 PE=1 SV=3|Isoform 4 of Branched-chain-amino-acid aminotransferase, cytosolic OS=Homo sapiens OX=9606 GN=BCAT1|Branched-chain-amino-acid aminotransferase, cytosolic OS=Homo sapiens OX=9606 GN=BCAT1 PE=1 SV=3|Isoform 4 of Branched-chain-amino-acid aminotransferase, cytosolic OS=Homo sapiens OX=9606 GN=BCAT1|Isofo…	50201.3|49769.0|51061.7	6	6.9543	-0.229928	26.6591	-1.69413	0.117295	0.999947	-4.33757	CA	no_hit
CDR2	Q01850	Cerebellar degeneration-related protein 2 OS=Homo sapiens OX=9606 GN=CDR2 PE=1 SV=2	62812.4	4	6.5995	0.236113	25.4174	1.69096	0.117912	0.999947	-4.33913	CA	no_hit
ALAD	P13716|P13716-2	Delta-aminolevulinic acid dehydratase OS=Homo sapiens OX=9606 GN=ALAD PE=1 SV=1|Delta-aminolevulinic acid dehydratase OS=Homo sapiens OX=9606 GN=ALAD PE=1 SV=1|Isoform 2 of Delta-aminolevulinic acid dehydratase OS=Homo sapiens OX=9606 GN=ALAD	40378.1|43533.6	8	7.22597	-0.20516	26.8523	-1.68879	0.118337	0.999947	-4.3402	CA	no_hit
CROCC	Q5TZA2	Rootletin OS=Homo sapiens OX=9606 GN=CROCC PE=1 SV=1	253732	3	6.48796	-0.187043	27.94	-1.6845	0.119178	0.999947	-4.34232	CA	no_hit
ROCK1	Q13464	Rho-associated protein kinase 1 OS=Homo sapiens OX=9606 GN=ROCK1 PE=1 SV=1	200474	26	7.25131	-0.189999	29.6657	-1.67787	0.120489	0.999947	-4.34558	CA	no_hit
NT5C2	P49902|Q5JUV4	Cytosolic purine 5'-nucleotidase OS=Homo sapiens OX=9606 GN=NT5C2 PE=1 SV=1|Cytosolic purine 5'-nucleotidase (Fragment) OS=Homo sapiens OX=9606 GN=NT5C2 PE=1 SV=1	76335.9|36941.4	14	8.06723	-0.209814	29.8485	-1.67552	0.120956	0.999947	-4.34673	CA	no_hit
SUGP1	Q8IWZ8	SURP and G-patch domain-containing protein 1 OS=Homo sapiens OX=9606 GN=SUGP1 PE=1 SV=2	91096.1	9	6.99008	0.252033	27.3158	1.67441	0.121178	0.999947	-4.34728	CA	no_hit
SNAPC4	Q5SXM2	snRNA-activating protein complex subunit 4 OS=Homo sapiens OX=9606 GN=SNAPC4 PE=1 SV=1	181428	2	6.02309	-0.217503	22.4377	-1.6718	0.121699	0.999947	-4.34856	CA	no_hit
MPDZ	F5H1U9|O75970|O75970-2|O75970-3|O75970-5	Multiple PDZ domain protein OS=Homo sapiens OX=9606 GN=MPDZ PE=1 SV=1|Multiple PDZ domain protein OS=Homo sapiens OX=9606 GN=MPDZ PE=1 SV=2|Isoform 2 of Multiple PDZ domain protein OS=Homo sapiens OX=9606 GN=MPDZ|Isoform 3 of Multiple PDZ domain protein OS=Homo sapiens OX=9606 GN=MPDZ|Isoform 4 of Multiple PDZ domain protein OS=Homo sapiens OX=9606 GN=MPDZ	254112.0|252604.0|249135.0|247991.0|244521.0	19	8.03224	0.270941	28.8858	1.66456	0.123159	0.999947	-4.35211	CA	no_hit
RAB11FIP5	A0A1B0GTL5	Rab11 family-interacting protein 5 OS=Homo sapiens OX=9606 GN=RAB11FIP5 PE=1 SV=1	155079	11	7.75056	0.213257	28.3184	1.65478	0.125155	0.999947	-4.3569	CA	no_hit
TJP3	O95049|O95049-3|O95049-4|O95049-5	Tight junction protein ZO-3 OS=Homo sapiens OX=9606 GN=TJP3 PE=1 SV=3|Isoform 3 of Tight junction protein ZO-3 OS=Homo sapiens OX=9606 GN=TJP3|Isoform 4 of Tight junction protein ZO-3 OS=Homo sapiens OX=9606 GN=TJP3|Isoform 6 of Tight junction protein ZO-3 OS=Homo sapiens OX=9606 GN=TJP3|Tight junction protein ZO-3 OS=Homo sapiens OX=9606 GN=TJP3 PE=1 SV=3	111184.0|113267.0|112202.0|106973.0	5	6.65909	0.284927	26.2661	1.65326	0.125466	0.999947	-4.35764	CA	no_hit
HOOK1	Q9UJC3|Q9UJC3-2	Protein Hook homolog 1 OS=Homo sapiens OX=9606 GN=HOOK1 PE=1 SV=2|Isoform 2 of Protein Hook homolog 1 OS=Homo sapiens OX=9606 GN=HOOK1	104083.0|98737.2	6	6.73826	0.278212	26.3827	1.65195	0.125737	0.999947	-4.35828	CA	no_hit
CSTF2	E9PID8|P33240|P33240-2	Cleavage stimulation factor subunit 2 OS=Homo sapiens OX=9606 GN=CSTF2 PE=1 SV=1|Cleavage stimulation factor subunit 2 OS=Homo sapiens OX=9606 GN=CSTF2 PE=1 SV=1|Isoform 2 of Cleavage stimulation factor subunit 2 OS=Homo sapiens OX=9606 GN=CSTF2	50401.0|64989.2|63282.4	6	7.57423	0.46971	28.0491	1.64622	0.126924	0.999947	-4.36109	CA	no_hit
SMARCE1	A0A2R8Y855|B4DGM3|Q969G3|Q969G3-2|J3QKS7	SWI/SNF-related matrix-associated actin-dependent regulator of chromatin subfamily E member 1 OS=Homo sapiens OX=9606 GN=SMARCE1 PE=1 SV=1|SWI/SNF-related matrix-associated actin-dependent regulator of chromatin subfamily E member 1 OS=Homo sapiens OX=9606 GN=SMARCE1 PE=1 SV=1|SWI/SNF-related matrix-associated actin-dependent regulator of chromatin subfamily E member 1 OS=Homo sapiens OX=9606 GN=…	50175.4|53621.7|55803.8|50746.8|40033.2	11	7.34635	0.337785	28.5438	1.64417	0.12735	0.999947	-4.36208	CA	no_hit
HS1BP3	Q53T59	HCLS1-binding protein 3 OS=Homo sapiens OX=9606 GN=HS1BP3 PE=1 SV=1	51081.6	8	7.32763	-0.215424	27.2644	-1.64136	0.127939	0.999947	-4.36346	CA	no_hit
OXSM	Q9NWU1	3-oxoacyl-[acyl-carrier-protein] synthase, mitochondrial OS=Homo sapiens OX=9606 GN=OXSM PE=1 SV=1	56435.8	5	7.17253	0.219173	26.6916	1.6378	0.128687	0.999947	-4.36519	CA	no_hit
RRM2B	H0YAV1|Q7LG56|Q7LG56-6	Ribonucleoside-diphosphate reductase subunit M2 B (Fragment) OS=Homo sapiens OX=9606 GN=RRM2B PE=1 SV=1|Ribonucleoside-diphosphate reductase subunit M2 B OS=Homo sapiens OX=9606 GN=RRM2B PE=1 SV=1|Isoform 6 of Ribonucleoside-diphosphate reductase subunit M2 B OS=Homo sapiens OX=9606 GN=RRM2B	55527.4|47631.1|57235.4	7	7.4804	-0.194159	27.8685	-1.63208	0.129896	0.999947	-4.36798	CA	no_hit
DTD1	A0A2R8Y6X2|A0A2R8YCT7|Q8TEA8	D-aminoacyl-tRNA deacylase OS=Homo sapiens OX=9606 GN=DTD1 PE=1 SV=1|D-aminoacyl-tRNA deacylase OS=Homo sapiens OX=9606 GN=DTD1 PE=1 SV=1|D-aminoacyl-tRNA deacylase 1 OS=Homo sapiens OX=9606 GN=DTD1 PE=1 SV=2	27830.7|17738.7|29360.0	4	7.39383	-0.210699	26.3386	-1.63162	0.129992	0.999947	-4.3682	CA	no_hit
TXLNA	P40222	Alpha-taxilin OS=Homo sapiens OX=9606 GN=TXLNA PE=1 SV=3	78622.6	17	7.57028	0.452836	29.7117	1.63076	0.130177	0.999947	-4.36862	CA	no_hit
GATAD2A	Q86YP4|Q86YP4-2|Q86YP4-3	Transcriptional repressor p66-alpha OS=Homo sapiens OX=9606 GN=GATAD2A PE=1 SV=1|Isoform 2 of Transcriptional repressor p66-alpha OS=Homo sapiens OX=9606 GN=GATAD2A|Isoform 3 of Transcriptional repressor p66-alpha OS=Homo sapiens OX=9606 GN=GATAD2A	79922.5|76478.6|79993.6	4	6.61025	0.21922	26.6659	1.62897	0.130557	0.999947	-4.36949	CA	no_hit
GNPDA2	Q8TDQ7|Q8TDQ7-2|Q8TDQ7-3	Glucosamine-6-phosphate isomerase 2 OS=Homo sapiens OX=9606 GN=GNPDA2 PE=1 SV=1|Isoform 2 of Glucosamine-6-phosphate isomerase 2 OS=Homo sapiens OX=9606 GN=GNPDA2|Isoform 3 of Glucosamine-6-phosphate isomerase 2 OS=Homo sapiens OX=9606 GN=GNPDA2|Glucosamine-6-phosphate isomerase 2 OS=Homo sapiens OX=9606 GN=GNPDA2 PE=1 SV=1	37376.8|37247.8|34858.4	5	7.08664	-0.16152	26.5524	-1.62656	0.131072	0.999947	-4.37066	CA	no_hit
DHCR24	A0A0A0MTI1|Q15392|Q15392-2	Delta(24)-sterol reductase OS=Homo sapiens OX=9606 GN=DHCR24 PE=1 SV=1|Delta(24)-sterol reductase OS=Homo sapiens OX=9606 GN=DHCR24 PE=1 SV=2|Isoform 2 of Delta(24)-sterol reductase OS=Homo sapiens OX=9606 GN=DHCR24	71635.4|70233.7|63973.6	9	7.73864	-0.18973	27.9273	-1.62369	0.131688	0.999947	-4.37206	CA	no_hit
SLC5A6	Q9Y289	Sodium-dependent multivitamin transporter OS=Homo sapiens OX=9606 GN=SLC5A6 PE=2 SV=2	72855	4	6.78632	-0.344356	25.4362	-1.62283	0.131874	0.999947	-4.37248	CA	no_hit
APEH	C9JIF9|P13798	Acylamino-acid-releasing enzyme OS=Homo sapiens OX=9606 GN=APEH PE=1 SV=1|Acylamino-acid-releasing enzyme OS=Homo sapiens OX=9606 GN=APEH PE=1 SV=4	91223.0|90659.8	16	7.91484	-0.153481	29.7648	-1.62217	0.132015	0.999947	-4.3728	CA	no_hit
PRUNE2	A0A088AWP5|E9PDC2|H7BZH9|Q8WUY3|Q8WUY3-2|Q8WUY3-3|Q8WUY3-4	Protein prune homolog 2 OS=Homo sapiens OX=9606 GN=PRUNE2 PE=1 SV=1|Protein prune homolog 2 OS=Homo sapiens OX=9606 GN=PRUNE2 PE=1 SV=1|Protein prune homolog 2 (Fragment) OS=Homo sapiens OX=9606 GN=PRUNE2 PE=1 SV=1|Protein prune homolog 2 OS=Homo sapiens OX=9606 GN=PRUNE2 PE=1 SV=3|Isoform 2 of Protein prune homolog 2 OS=Homo sapiens OX=9606 GN=PRUNE2|Isoform 3 of Protein prune homolog 2 OS=Homo …	379606.0|336001.0|296191.0|383603.0|383732.0|384058.0|378306.0	2	7.02884	-0.159867	25.921	-1.6212	0.132223	0.999947	-4.37326	CA	no_hit
UBE2K	P61086	Ubiquitin-conjugating enzyme E2 K OS=Homo sapiens OX=9606 GN=UBE2K PE=1 SV=3	26765.5	9	7.861	-0.200041	28.7047	-1.62016	0.132449	0.999947	-4.37377	CA	no_hit
IMPA1	P29218|P29218-3	Inositol monophosphatase 1 OS=Homo sapiens OX=9606 GN=IMPA1 PE=1 SV=1|Inositol monophosphatase 1 OS=Homo sapiens OX=9606 GN=IMPA1 PE=1 SV=1|Isoform 3 of Inositol monophosphatase 1 OS=Homo sapiens OX=9606 GN=IMPA1	35435.6|44066.7	10	7.78045	-0.177209	29.2547	-1.61765	0.132991	0.999947	-4.37499	CA	no_hit
ZNF148	Q9UQR1	Zinc finger protein 148 OS=Homo sapiens OX=9606 GN=ZNF148 PE=1 SV=2	108104	3	6.32054	0.2379	25.6885	1.61564	0.133429	0.999947	-4.37597	CA	no_hit
FBXL18	Q96ME1-4	Isoform 4 of F-box/LRR-repeat protein 18 OS=Homo sapiens OX=9606 GN=FBXL18	87291.1	10	7.32538	-0.1637	28.1859	-1.61461	0.133652	0.999947	-4.37646	CA	no_hit
TXNDC17	Q9BRA2	Thioredoxin domain-containing protein 17 OS=Homo sapiens OX=9606 GN=TXNDC17 PE=1 SV=1	17259	5	7.69118	-0.203755	27.9007	-1.61444	0.133688	0.999947	-4.37654	CA	no_hit
REEP3	Q6NUK4|A0A0U1RR85|Q6NUK4-2	Receptor expression-enhancing protein 3 OS=Homo sapiens OX=9606 GN=REEP3 PE=1 SV=1|Receptor expression-enhancing protein (Fragment) OS=Homo sapiens OX=9606 GN=REEP3 PE=1 SV=1|Receptor expression-enhancing protein 3 OS=Homo sapiens OX=9606 GN=REEP3 PE=1 SV=1|Isoform 2 of Receptor expression-enhancing protein 3 OS=Homo sapiens OX=9606 GN=REEP3	36850.4|11265.3|20030.1	4	7.22959	-0.158905	26.614	-1.60978	0.134706	0.999947	-4.3788	CA	no_hit
FABP5	Q01469	Fatty acid-binding protein 5 OS=Homo sapiens OX=9606 GN=FABP5 PE=1 SV=3	19755.6	10	8.55772	-0.210884	29.796	-1.60923	0.134828	0.999947	-4.37907	CA	no_hit
STIM1	G0XQ39|Q13586	STIM1L OS=Homo sapiens OX=9606 GN=STIM1 PE=1 SV=1|Stromal interaction molecule 1 OS=Homo sapiens OX=9606 GN=STIM1 PE=1 SV=3|Stromal interaction molecule 1 OS=Homo sapiens OX=9606 GN=STIM1 PE=1 SV=3	104447.0|93175.0	17	7.83859	0.228113	29.3503	1.60504	0.135751	0.999947	-4.3811	CA	no_hit
GOLGA3	Q08378	Golgin subfamily A member 3 OS=Homo sapiens OX=9606 GN=GOLGA3 PE=1 SV=2	200620	42	7.62914	0.209056	30.6626	1.60237	0.136341	0.999947	-4.38239	CA	no_hit
PCTP	I3L2M9|I3L3H0|I3L4Z8|Q9UKL6|Q9UKL6-2	Phosphatidylcholine transfer protein OS=Homo sapiens OX=9606 GN=PCTP PE=1 SV=1|Phosphatidylcholine transfer protein OS=Homo sapiens OX=9606 GN=PCTP PE=1 SV=1|Phosphatidylcholine transfer protein (Fragment) OS=Homo sapiens OX=9606 GN=PCTP PE=1 SV=1|Phosphatidylcholine transfer protein OS=Homo sapiens OX=9606 GN=PCTP PE=1 SV=1|Isoform 2 of Phosphatidylcholine transfer protein OS=Homo sapiens OX=960…	27593.3|30245.9|20117.1|29922.7|20882.1	2	6.92838	-0.200517	25.8331	-1.59779	0.137358	0.999947	-4.3846	CA	no_hit
SPTY2D1	Q68D10|Q68D10-2	Protein SPT2 homolog OS=Homo sapiens OX=9606 GN=SPTY2D1 PE=1 SV=3|Isoform 2 of Protein SPT2 homolog OS=Homo sapiens OX=9606 GN=SPTY2D1|Protein SPT2 homolog OS=Homo sapiens OX=9606 GN=SPTY2D1 PE=1 SV=3	97265.3|95289.1	7	6.77381	0.429372	27.5428	1.59355	0.138308	0.999947	-4.38665	CA	no_hit
CD3EAP	O15446|O15446-2	DNA-directed RNA polymerase I subunit RPA34 OS=Homo sapiens OX=9606 GN=CD3EAP PE=1 SV=1|Isoform 2 of DNA-directed RNA polymerase I subunit RPA34 OS=Homo sapiens OX=9606 GN=CD3EAP	71967.9|72153.9	5	6.90252	0.538415	26.8601	1.589	0.139331	0.999947	-4.38884	CA	no_hit
SGK2	Q9HBY8|Q9HBY8-2|Q9HBY8-3|X6R8H3	Serine/threonine-protein kinase Sgk2 OS=Homo sapiens OX=9606 GN=SGK2 PE=1 SV=1|Isoform 1 of Serine/threonine-protein kinase Sgk2 OS=Homo sapiens OX=9606 GN=SGK2|Isoform 3 of Serine/threonine-protein kinase Sgk2 OS=Homo sapiens OX=9606 GN=SGK2|Serine/threonine-protein kinase Sgk2 OS=Homo sapiens OX=9606 GN=SGK2 PE=1 SV=2	55502.2|48240.6|51459.1|48358.1	2	6.32265	-0.173323	23.8239	-1.58785	0.139591	0.999947	-4.38939	CA	no_hit
SARG	Q9BW04|Q9BW04-2	Specifically androgen-regulated gene protein OS=Homo sapiens OX=9606 GN=SARG PE=1 SV=2|Isoform 2 of Specifically androgen-regulated gene protein OS=Homo sapiens OX=9606 GN=SARG|Specifically androgen-regulated gene protein OS=Homo sapiens OX=9606 GN=SARG PE=1 SV=2	73945.2|46436.8	3	6.61749	0.194232	25.4151	1.58553	0.140116	0.999947	-4.39051	CA	no_hit
RDX	A0A2R8Y5S7|E9PNV3|P35241|P35241-5	Radixin OS=Homo sapiens OX=9606 GN=RDX PE=1 SV=1|Radixin (Fragment) OS=Homo sapiens OX=9606 GN=RDX PE=1 SV=1|Radixin OS=Homo sapiens OX=9606 GN=RDX PE=1 SV=1|Isoform 5 of Radixin OS=Homo sapiens OX=9606 GN=RDX|Radixin OS=Homo sapiens OX=9606 GN=RDX PE=1 SV=1|Radixin OS=Homo sapiens OX=9606 GN=RDX PE=1 SV=1|Isoform 5 of Radixin OS=Homo sapiens OX=9606 GN=RDX	89788.7|21587.9|89017.3|92166.0	24	8.39893	-0.180089	31.1808	-1.58502	0.140233	0.999947	-4.39076	CA	no_hit
BCL9L	A0A087WZX0|Q86UU0|Q86UU0-2|Q86UU0-4	B-cell CLL/lymphoma 9-like protein OS=Homo sapiens OX=9606 GN=BCL9L PE=1 SV=1|B-cell CLL/lymphoma 9-like protein OS=Homo sapiens OX=9606 GN=BCL9L PE=1 SV=1|Isoform 2 of B-cell CLL/lymphoma 9-like protein OS=Homo sapiens OX=9606 GN=BCL9L|Isoform 4 of B-cell CLL/lymphoma 9-like protein OS=Homo sapiens OX=9606 GN=BCL9L	165193.0|169899.0|169299.0|165016.0	4	6.60564	0.412142	26.6675	1.57592	0.142312	0.999947	-4.39513	CA	no_hit
ANXA10	Q9UJ72	Annexin A10 OS=Homo sapiens OX=9606 GN=ANXA10 PE=1 SV=3	41777.9	6	7.42457	-0.306447	26.3914	-1.57547	0.142417	0.999947	-4.39535	CA	no_hit
GGCT	O75223	Gamma-glutamylcyclotransferase OS=Homo sapiens OX=9606 GN=GGCT PE=1 SV=1	26089.7	7	7.8575	-0.254474	28.24	-1.57482	0.142565	0.999947	-4.39566	CA	no_hit
MTA2	O94776	Metastasis-associated protein MTA2 OS=Homo sapiens OX=9606 GN=MTA2 PE=1 SV=1	88797.9	28	7.745	0.246541	30.2953	1.56922	0.14386	0.999947	-4.39834	CA	no_hit
CRYZL1	O95825	Quinone oxidoreductase-like protein 1 OS=Homo sapiens OX=9606 GN=CRYZL1 PE=1 SV=2	46980.6	9	6.99155	-0.160211	27.4366	-1.56789	0.144169	0.999947	-4.39898	CA	no_hit
ERCC1	K7EP14|K7ER89|P07992|P07992-2|P07992-3	DNA excision repair protein ERCC-1 (Fragment) OS=Homo sapiens OX=9606 GN=ERCC1 PE=1 SV=1|DNA excision repair protein ERCC-1 (Fragment) OS=Homo sapiens OX=9606 GN=ERCC1 PE=1 SV=1|DNA excision repair protein ERCC-1 OS=Homo sapiens OX=9606 GN=ERCC1 PE=1 SV=1|Isoform 2 of DNA excision repair protein ERCC-1 OS=Homo sapiens OX=9606 GN=ERCC1|Isoform 3 of DNA excision repair protein ERCC-1 OS=Homo sapien…	33690.2|30457.4|38664.0|35431.2|43487.9	4	6.89989	0.177468	27.0776	1.56594	0.144625	0.999947	-4.39992	CA	no_hit
WIZ	B9EGQ5|M0QXA7|O95785-3|O95785-4|O95785	Protein Wiz OS=Homo sapiens OX=9606 GN=WIZ PE=1 SV=1|Protein Wiz OS=Homo sapiens OX=9606 GN=WIZ PE=1 SV=1|Isoform 3 of Protein Wiz OS=Homo sapiens OX=9606 GN=WIZ|Isoform 4 of Protein Wiz OS=Homo sapiens OX=9606 GN=WIZ|Protein Wiz OS=Homo sapiens OX=9606 GN=WIZ PE=1 SV=1|Protein Wiz OS=Homo sapiens OX=9606 GN=WIZ PE=1 SV=2|Isoform 3 of Protein Wiz OS=Homo sapiens OX=9606 GN=WIZ	107442.0|123901.0|123600.0|107743.0|203945.0	10	6.88863	0.270606	27.5281	1.56551	0.144725	0.999947	-4.40012	CA	no_hit
MICALL1	Q8N3F8	MICAL-like protein 1 OS=Homo sapiens OX=9606 GN=MICALL1 PE=1 SV=2	110780	8	7.32498	0.190261	27.6191	1.55874	0.146313	0.999947	-4.40336	CA	no_hit
RDH10	Q8IZV5	Retinol dehydrogenase 10 OS=Homo sapiens OX=9606 GN=RDH10 PE=1 SV=1	44222.4	7	7.84776	-0.18977	28.416	-1.55855	0.146356	0.999947	-4.40345	CA	no_hit
IRF2BP1	Q8IU81	Interferon regulatory factor 2-binding protein 1 OS=Homo sapiens OX=9606 GN=IRF2BP1 PE=1 SV=1	69253.9	12	7.24422	0.233301	27.9536	1.55726	0.146662	0.999947	-4.40407	CA	no_hit
MRPL10	Q7Z7H8|Q7Z7H8-2	39S ribosomal protein L10, mitochondrial OS=Homo sapiens OX=9606 GN=MRPL10 PE=1 SV=3|Isoform 2 of 39S ribosomal protein L10, mitochondrial OS=Homo sapiens OX=9606 GN=MRPL10	33750.7|34832.1	3	7.18152	0.242989	27.0689	1.5538	0.14748	0.999947	-4.40572	CA	no_hit
RABIF	P47224	Guanine nucleotide exchange factor MSS4 OS=Homo sapiens OX=9606 GN=RABIF PE=1 SV=2	15940.2	3	6.96636	-0.257393	25.637	-1.55161	0.147999	0.999947	-4.40676	CA	no_hit
DMAP1	Q9NPF5	DNA methyltransferase 1-associated protein 1 OS=Homo sapiens OX=9606 GN=DMAP1 PE=1 SV=1	68341.2	8	6.98104	0.386167	27.5324	1.54989	0.148409	0.999947	-4.40759	CA	no_hit
ATXN2L	Q8WWM7	Ataxin-2-like protein OS=Homo sapiens OX=9606 GN=ATXN2L PE=1 SV=2	126974	21	7.75037	0.302334	30.2596	1.54901	0.14862	0.999947	-4.40801	CA	no_hit
NLRP2	A0A0G2JMG8|A0A0G2JPQ2|Q9NX02|Q9NX02-5	NACHT, LRR and PYD domains-containing protein 2 OS=Homo sapiens OX=9606 GN=NLRP2 PE=1 SV=1|NACHT, LRR and PYD domains-containing protein 2 OS=Homo sapiens OX=9606 GN=NLRP2 PE=1 SV=1|NACHT, LRR and PYD domains-containing protein 2 OS=Homo sapiens OX=9606 GN=NLRP2 PE=1 SV=1|Isoform 5 of NACHT, LRR and PYD domains-containing protein 2 OS=Homo sapiens OX=9606 GN=NLRP2	139641.0|142937.0|142967.0|139671.0	31	7.80359	-0.185991	30.2867	-1.54424	0.149763	0.999947	-4.41028	CA	no_hit
ELMO2	Q5JVZ5|Q96JJ3	Engulfment and cell motility protein 2 OS=Homo sapiens OX=9606 GN=ELMO2 PE=1 SV=1|Engulfment and cell motility protein 2 OS=Homo sapiens OX=9606 GN=ELMO2 PE=1 SV=2	95849.3|96099.3	14	7.45209	-0.159747	28.9979	-1.54231	0.150228	0.999947	-4.4112	CA	no_hit
SMARCD2	B9EGA3|J3KMX2|Q92925|Q92925-2|Q92925-3	SMARCD2 protein OS=Homo sapiens OX=9606 GN=SMARCD2 PE=1 SV=1|SWI/SNF-related matrix-associated actin-dependent regulator of chromatin subfamily D member 2 OS=Homo sapiens OX=9606 GN=SMARCD2 PE=1 SV=1|SWI/SNF-related matrix-associated actin-dependent regulator of chromatin subfamily D member 2 OS=Homo sapiens OX=9606 GN=SMARCD2 PE=1 SV=3|Isoform 2 of SWI/SNF-related matrix-associated actin-depende…	65176.3|61559.5|68237.9|66732.9|64919.3	7	6.86843	0.313973	27.186	1.54165	0.150388	0.999947	-4.41151	CA	no_hit
WDR1	O75083	WD repeat-containing protein 1 OS=Homo sapiens OX=9606 GN=WDR1 PE=1 SV=4	79004.4	28	8.72475	-0.17412	31.4239	-1.53846	0.151159	0.999947	-4.41303	CA	no_hit
YY1	P25490	Transcriptional repressor protein YY1 OS=Homo sapiens OX=9606 GN=YY1 PE=1 SV=2	54875.5	7	7.23034	0.210387	27.9616	1.53445	0.152132	0.999947	-4.41493	CA	no_hit
ACSL5	Q9ULC5-3	Isoform 2 of Long-chain-fatty-acid--CoA ligase 5 OS=Homo sapiens OX=9606 GN=ACSL5	99359.7	3	6.33161	0.146912	24.7742	1.53312	0.152458	0.999947	-4.41557	CA	no_hit
ARFGEF3	Q5TH69	Brefeldin A-inhibited guanine nucleotide-exchange protein 3 OS=Homo sapiens OX=9606 GN=ARFGEF3 PE=1 SV=3	277021	6	6.44869	-0.147577	25.3811	-1.52968	0.153299	0.999947	-4.4172	CA	no_hit
TRIM11	Q96F44|Q96F44-3|R4GMV1	E3 ubiquitin-protein ligase TRIM11 OS=Homo sapiens OX=9606 GN=TRIM11 PE=1 SV=2|Isoform 3 of E3 ubiquitin-protein ligase TRIM11 OS=Homo sapiens OX=9606 GN=TRIM11|E3 ubiquitin-protein ligase TRIM11 OS=Homo sapiens OX=9606 GN=TRIM11 PE=1 SV=1|E3 ubiquitin-protein ligase TRIM11 OS=Homo sapiens OX=9606 GN=TRIM11 PE=1 SV=2|Isoform 3 of E3 ubiquitin-protein ligase TRIM11 OS=Homo sapiens OX=9606 GN=TRIM11	57113.2|56680.9|41765.9	4	6.64056	0.156017	26.442	1.52927	0.1534	0.999947	-4.41739	CA	no_hit
GCLM	P48507	Glutamate--cysteine ligase regulatory subunit OS=Homo sapiens OX=9606 GN=GCLM PE=1 SV=1	36221.4	11	8.04659	-0.17375	29.1783	-1.52561	0.154301	0.999947	-4.41913	CA	no_hit
FSCN1	Q16658	Fascin OS=Homo sapiens OX=9606 GN=FSCN1 PE=1 SV=3	63641.1	22	8.4119	-0.179315	30.4613	-1.52493	0.154467	0.999947	-4.41945	CA	no_hit
FERMT2	Q96AC1|Q96AC1-3	Fermitin family homolog 2 OS=Homo sapiens OX=9606 GN=FERMT2 PE=1 SV=1|Isoform 3 of Fermitin family homolog 2 OS=Homo sapiens OX=9606 GN=FERMT2	97602.9|98417.3	17	7.87209	-0.165784	29.9895	-1.5248	0.154501	0.999947	-4.41951	CA	no_hit
PACC1	Q9H813|Q9H813-2	Proton-activated chloride channel OS=Homo sapiens OX=9606 GN=PACC1 PE=1 SV=1|Isoform 2 of Proton-activated chloride channel OS=Homo sapiens OX=9606 GN=PACC1	47908.0|55298.2	3	6.52046	0.183421	25.101	1.52431	0.154622	0.999947	-4.41974	CA	no_hit
PGAM1	P18669	Phosphoglycerate mutase 1 OS=Homo sapiens OX=9606 GN=PGAM1 PE=1 SV=2	34375.6	15	8.93572	-0.163635	31.4089	-1.52346	0.154832	0.999947	-4.42014	CA	no_hit
ZYX	Q15942	Zyxin OS=Homo sapiens OX=9606 GN=ZYX PE=1 SV=1	70345	16	8.12077	0.24146	29.7452	1.52307	0.154928	0.999947	-4.42033	CA	no_hit
ECPAS	J3KN16|Q5VYK3	Proteasome adapter and scaffold protein ECM29 OS=Homo sapiens OX=9606 GN=ECPAS PE=1 SV=1|Proteasome adapter and scaffold protein ECM29 OS=Homo sapiens OX=9606 GN=ECPAS PE=1 SV=2	267167.0|246140.0	40	7.87962	-0.182741	30.614	-1.52147	0.155326	0.999947	-4.42109	CA	no_hit
NCOR1	O75376	Nuclear receptor corepressor 1 OS=Homo sapiens OX=9606 GN=NCOR1 PE=1 SV=2	314154	16	7.12765	0.189953	28.4975	1.52046	0.155575	0.999947	-4.42156	CA	no_hit
CDC123	O75794	Cell division cycle protein 123 homolog OS=Homo sapiens OX=9606 GN=CDC123 PE=1 SV=1	46258.9	9	7.50458	-0.152793	28.2185	-1.51905	0.155927	0.999947	-4.42223	CA	no_hit
MT-ATP8	P03928	ATP synthase protein 8 OS=Homo sapiens OX=9606 GN=MT-ATP8 PE=1 SV=1	10172.6	3	7.02144	0.212193	26.7168	1.51852	0.156059	0.999947	-4.42248	CA	no_hit
AAMP	C9JEH3|C9JG97|Q13685	Angio-associated migratory cell protein OS=Homo sapiens OX=9606 GN=AAMP PE=1 SV=1|Angio-associated migratory cell protein OS=Homo sapiens OX=9606 GN=AAMP PE=1 SV=1|Angio-associated migratory cell protein OS=Homo sapiens OX=9606 GN=AAMP PE=1 SV=2	52039.8|50216.3|51968.8	9	7.44524	-0.141737	28.2807	-1.51622	0.156633	0.999947	-4.42357	CA	no_hit
SERPINE1	P05121	Plasminogen activator inhibitor 1 OS=Homo sapiens OX=9606 GN=SERPINE1 PE=1 SV=1	50868	16	7.8559	0.149683	29.1139	1.51266	0.157525	0.999947	-4.42525	CA	no_hit
CAMSAP3	Q9P1Y5|Q9P1Y5-2	Calmodulin-regulated spectrin-associated protein 3 OS=Homo sapiens OX=9606 GN=CAMSAP3 PE=1 SV=2|Calmodulin-regulated spectrin-associated protein 3 OS=Homo sapiens OX=9606 GN=CAMSAP3 PE=1 SV=2|Isoform 2 of Calmodulin-regulated spectrin-associated protein 3 OS=Homo sapiens OX=9606 GN=CAMSAP3	152804.0|156958.0	2	6.40345	0.204872	24.1954	1.51247	0.157571	0.999947	-4.42533	CA	no_hit
UBAP1	A0A0D9SG79|Q9NZ09|Q9NZ09-2|Q9NZ09-3|Q9NZ09-4	Ubiquitin-associated protein 1 (Fragment) OS=Homo sapiens OX=9606 GN=UBAP1 PE=1 SV=1|Ubiquitin-associated protein 1 OS=Homo sapiens OX=9606 GN=UBAP1 PE=1 SV=1|Isoform 2 of Ubiquitin-associated protein 1 OS=Homo sapiens OX=9606 GN=UBAP1|Isoform 3 of Ubiquitin-associated protein 1 OS=Homo sapiens OX=9606 GN=UBAP1|Isoform 4 of Ubiquitin-associated protein 1 OS=Homo sapiens OX=9606 GN=UBAP1	68483.7|67235.4|59319.5|69610.4|73441.5	4	6.92354	0.225238	26.2641	1.51081	0.157988	0.999947	-4.42612	CA	no_hit
GLRX	P35754	Glutaredoxin-1 OS=Homo sapiens OX=9606 GN=GLRX PE=1 SV=2	13878.5	2	7.22424	-0.20884	25.3954	-1.50909	0.158423	0.999947	-4.42693	CA	no_hit
EML2	O95834-2|O95834-3	Isoform 2 of Echinoderm microtubule-associated protein-like 2 OS=Homo sapiens OX=9606 GN=EML2|Isoform 3 of Echinoderm microtubule-associated protein-like 2 OS=Homo sapiens OX=9606 GN=EML2	97595.6|103362.0	12	7.35895	-0.192676	27.9205	-1.50859	0.158549	0.999947	-4.42717	CA	no_hit
AP1G2	O75843	AP-1 complex subunit gamma-like 2 OS=Homo sapiens OX=9606 GN=AP1G2 PE=1 SV=1	94913.8	6	6.91488	-0.207682	26.9276	-1.50589	0.159231	0.999947	-4.42844	CA	no_hit
SEC23B	A0A2R8YFH5|Q15437	Protein transport protein SEC23 OS=Homo sapiens OX=9606 GN=SEC23B PE=1 SV=1|Protein transport protein Sec23B OS=Homo sapiens OX=9606 GN=SEC23B PE=1 SV=2	94152.8|96214.9	15	7.65408	0.190728	29.5978	1.50467	0.159542	0.999947	-4.42901	CA	no_hit
SEPTIN7	Q16181|Q16181-2	Septin-7 OS=Homo sapiens OX=9606 GN=SEPTIN7 PE=1 SV=2|Isoform 2 of Septin-7 OS=Homo sapiens OX=9606 GN=SEPTIN7	64926.6|64827.6	20	8.44231	0.151785	30.7714	1.50355	0.159826	0.999947	-4.42954	CA	no_hit
CCAR2	Q8N163|Q8N163-2	Cell cycle and apoptosis regulator protein 2 OS=Homo sapiens OX=9606 GN=CCAR2 PE=1 SV=2|Isoform 2 of Cell cycle and apoptosis regulator protein 2 OS=Homo sapiens OX=9606 GN=CCAR2	117154.0|117091.0	31	8.21599	0.211656	30.8521	1.50306	0.159951	0.999947	-4.42977	CA	no_hit
RNH1	P13489	Ribonuclease inhibitor OS=Homo sapiens OX=9606 GN=RNH1 PE=1 SV=2	56633.1	17	8.42131	-0.160815	30.0718	-1.50235	0.160132	0.999947	-4.4301	CA	no_hit
SH3BGRL3	Q5T123|Q9H299	SH3 domain-binding glutamic acid-rich-like protein 3 OS=Homo sapiens OX=9606 GN=SH3BGRL3 PE=1 SV=1|SH3 domain-binding glutamic acid-rich-like protein 3 OS=Homo sapiens OX=9606 GN=SH3BGRL3 PE=1 SV=1	10344.4|11705.1	4	7.58349	-0.333954	27.5411	-1.5021	0.160194	0.999947	-4.43022	CA	no_hit
YAP1	P46937|P46937-6|P46937-7|P46937-9	Transcriptional coactivator YAP1 OS=Homo sapiens OX=9606 GN=YAP1 PE=1 SV=2|Isoform 6 of Transcriptional coactivator YAP1 OS=Homo sapiens OX=9606 GN=YAP1|Isoform 7 of Transcriptional coactivator YAP1 OS=Homo sapiens OX=9606 GN=YAP1|Isoform 9 of Transcriptional coactivator YAP1 OS=Homo sapiens OX=9606 GN=YAP1	58743.4|53664.8|54145.1|59223.7	3	6.82894	0.247584	25.628	1.50031	0.160653	0.999947	-4.43106	CA	no_hit
MRGBP	Q9NV56	MRG/MORF4L-binding protein OS=Homo sapiens OX=9606 GN=MRGBP PE=1 SV=1	27745.6	3	6.60635	0.209208	26.0416	1.49685	0.161538	0.999947	-4.43269	CA	no_hit
NMRAL1	Q9HBL8	NmrA-like family domain-containing protein 1 OS=Homo sapiens OX=9606 GN=NMRAL1 PE=1 SV=1	39882.7	6	7.04169	-0.170265	26.7577	-1.49511	0.161986	0.999947	-4.43351	CA	no_hit
MCM4	P33991	DNA replication licensing factor MCM4 OS=Homo sapiens OX=9606 GN=MCM4 PE=1 SV=5	110757	31	8.12642	0.176877	31.0905	1.4914	0.162941	0.999947	-4.43524	CA	no_hit
PPP2CA	P67775	Serine/threonine-protein phosphatase 2A catalytic subunit alpha isoform OS=Homo sapiens OX=9606 GN=PPP2CA PE=1 SV=1	39792.1	2	7.96293	-0.187466	27.7164	-1.49109	0.163021	0.999947	-4.43539	CA	no_hit
MTPN	P58546	Myotrophin OS=Homo sapiens OX=9606 GN=MTPN PE=1 SV=2	16708.2	4	7.7755	-0.267475	27.474	-1.48951	0.16343	0.999947	-4.43613	CA	no_hit
CIAO1	O76071	Probable cytosolic iron-sulfur protein assembly protein CIAO1 OS=Homo sapiens OX=9606 GN=CIAO1 PE=1 SV=1	42492.7	6	7.59293	-0.152009	28.3249	-1.48909	0.16354	0.999947	-4.43633	CA	no_hit
HDGFL2	Q7Z4V5|Q7Z4V5-2|Q7Z4V5-3|Q7Z4V5-4	Hepatoma-derived growth factor-related protein 2 OS=Homo sapiens OX=9606 GN=HDGFL2 PE=1 SV=1|Isoform 2 of Hepatoma-derived growth factor-related protein 2 OS=Homo sapiens OX=9606 GN=HDGFL2|Hepatoma-derived growth factor-related protein 2 OS=Homo sapiens OX=9606 GN=HDGFL2 PE=1 SV=1|Isoform 2 of Hepatoma-derived growth factor-related protein 2 OS=Homo sapiens OX=9606 GN=HDGFL2|Isoform 3 of Hepatoma…	97867.2|97780.2|98366.5|98279.4	10	7.72422	0.218509	28.7591	1.48874	0.16363	0.999947	-4.43649	CA	no_hit
STX10	O60499|Q5U8S2	Syntaxin-10 OS=Homo sapiens OX=9606 GN=STX10 PE=1 SV=1|Syntaxin-10 OS=Homo sapiens OX=9606 GN=STX10 PE=1 SV=1	31252.4|30641.8	3	5.93612	-0.2184	24.391	-1.48567	0.16443	0.999947	-4.43793	CA	no_hit
PPP1R18	A0A0G2JHC2|Q6NYC8	PPP1R18 OS=Homo sapiens OX=9606 GN=PPP1R18 PE=1 SV=1|Phostensin OS=Homo sapiens OX=9606 GN=PPP1R18 PE=1 SV=1|Phostensin OS=Homo sapiens OX=9606 GN=PPP1R18 PE=1 SV=1	75890.9|75791.8	7	7.08582	0.227687	27.3642	1.4849	0.164629	0.999947	-4.43829	CA	no_hit
SMARCC1	Q92922	SWI/SNF complex subunit SMARCC1 OS=Homo sapiens OX=9606 GN=SMARCC1 PE=1 SV=3	147944	13	7.54169	0.25456	29.4647	1.48369	0.164946	0.999947	-4.43886	CA	no_hit
CBR4	H0Y962|Q8N4T8|Q8N4T8-2	Carbonyl reductase family member 4 (Fragment) OS=Homo sapiens OX=9606 GN=CBR4 PE=1 SV=1|Carbonyl reductase family member 4 OS=Homo sapiens OX=9606 GN=CBR4 PE=1 SV=3|Isoform 2 of Carbonyl reductase family member 4 OS=Homo sapiens OX=9606 GN=CBR4	23629.1|30323.8|22646.4	5	7.00708	0.223305	27.2475	1.4836	0.164968	0.999947	-4.4389	CA	no_hit
MCTS1	Q9ULC4|Q9ULC4-3	Malignant T-cell-amplified sequence 1 OS=Homo sapiens OX=9606 GN=MCTS1 PE=1 SV=1|Isoform 3 of Malignant T-cell-amplified sequence 1 OS=Homo sapiens OX=9606 GN=MCTS1	26549.8|26240.6	6	7.84258	-0.139303	29.4103	-1.48325	0.16506	0.999947	-4.43906	CA	no_hit
PEX14	O75381|O75381-2	Peroxisomal membrane protein PEX14 OS=Homo sapiens OX=9606 GN=PEX14 PE=1 SV=1|Isoform 2 of Peroxisomal membrane protein PEX14 OS=Homo sapiens OX=9606 GN=PEX14	46744.4|42212.2	5	7.05844	0.340667	26.5642	1.47993	0.16593	0.999947	-4.44061	CA	no_hit
NRBF2	Q96F24|Q96F24-2	Nuclear receptor-binding factor 2 OS=Homo sapiens OX=9606 GN=NRBF2 PE=1 SV=1|Nuclear receptor-binding factor 2 OS=Homo sapiens OX=9606 GN=NRBF2 PE=1 SV=1|Isoform 2 of Nuclear receptor-binding factor 2 OS=Homo sapiens OX=9606 GN=NRBF2	40742.3|34048.9	4	6.68762	0.284392	26.2748	1.47926	0.166106	0.999947	-4.44093	CA	no_hit
TAGLN	Q01995	Transgelin OS=Homo sapiens OX=9606 GN=TAGLN PE=1 SV=4	27825	9	7.15131	-0.165032	27.0506	-1.47722	0.166643	0.999947	-4.44188	CA	no_hit
DYRK1A	A0A2R8Y6I6|A0A2R8Y6L5|Q13627|Q13627-2|Q13627-5|A0A2R8YDF3|Q13627-3|Q13627-4	Dual-specificity tyrosine-phosphorylation-regulated kinase 1A OS=Homo sapiens OX=9606 GN=DYRK1A PE=1 SV=1|Dual-specificity tyrosine-phosphorylation-regulated kinase 1A (Fragment) OS=Homo sapiens OX=9606 GN=DYRK1A PE=1 SV=1|Dual specificity tyrosine-phosphorylation-regulated kinase 1A OS=Homo sapiens OX=9606 GN=DYRK1A PE=1 SV=2|Isoform 1 of Dual specificity tyrosine-phosphorylation-regulated kinas…	93868.3|81070.7|98211.5|97184.9|78738.7|72067.8|72916.0|72388.7	3	6.50706	0.25305	25.8164	1.47326	0.167689	0.999947	-4.44373	CA	no_hit
IPO9	Q96P70	Importin-9 OS=Homo sapiens OX=9606 GN=IPO9 PE=1 SV=3	129331	21	7.89745	-0.182521	29.6747	-1.4709	0.168316	0.999947	-4.44483	CA	no_hit
EDC4	Q6P2E9	Enhancer of mRNA-decapping protein 4 OS=Homo sapiens OX=9606 GN=EDC4 PE=1 SV=1	169115	25	7.68656	0.148148	29.7901	1.46905	0.168808	0.999947	-4.44569	CA	no_hit
CCNA2	P20248	Cyclin-A2 OS=Homo sapiens OX=9606 GN=CCNA2 PE=1 SV=2	58121.6	4	6.26797	0.194441	24.4592	1.4657	0.169703	0.999947	-4.44725	CA	no_hit
MAP7D1	Q3KQU3|Q3KQU3-2|Q3KQU3-4	MAP7 domain-containing protein 1 OS=Homo sapiens OX=9606 GN=MAP7D1 PE=1 SV=1|Isoform 2 of MAP7 domain-containing protein 1 OS=Homo sapiens OX=9606 GN=MAP7D1|Isoform 4 of MAP7 domain-containing protein 1 OS=Homo sapiens OX=9606 GN=MAP7D1	112880.0|107819.0|109472.0	10	7.10059	0.381984	28.6388	1.46563	0.169723	0.999947	-4.44728	CA	no_hit
GSE1	H0Y613|Q14687|Q14687-2|Q14687-3	Genetic suppressor element 1 (Fragment) OS=Homo sapiens OX=9606 GN=GSE1 PE=1 SV=1|Genetic suppressor element 1 OS=Homo sapiens OX=9606 GN=GSE1 PE=1 SV=3|Isoform 2 of Genetic suppressor element 1 OS=Homo sapiens OX=9606 GN=GSE1|Isoform 3 of Genetic suppressor element 1 OS=Homo sapiens OX=9606 GN=GSE1	128675.0|155227.0|143390.0|147077.0	3	6.4369	0.229282	23.2698	1.46541	0.169779	0.999947	-4.44738	CA	no_hit
SNX15	Q9NRS6	Sorting nexin-15 OS=Homo sapiens OX=9606 GN=SNX15 PE=1 SV=1	43191.9	3	6.70915	0.217936	26.6929	1.4648	0.169944	0.999947	-4.44766	CA	no_hit
PARP2	G3V167|Q9UGN5|Q9UGN5-2	Poly [ADP-ribose] polymerase OS=Homo sapiens OX=9606 GN=PARP2 PE=1 SV=1|Poly [ADP-ribose] polymerase 2 OS=Homo sapiens OX=9606 GN=PARP2 PE=1 SV=2|Isoform 2 of Poly [ADP-ribose] polymerase 2 OS=Homo sapiens OX=9606 GN=PARP2	76261.3|82552.5|80848.6	4	6.84954	0.251325	27.1221	1.45996	0.171245	0.999947	-4.44991	CA	no_hit
PARK7	K7ELW0|Q99497	Protein/nucleic acid deglycase DJ-1 OS=Homo sapiens OX=9606 GN=PARK7 PE=1 SV=1|Protein/nucleic acid deglycase DJ-1 OS=Homo sapiens OX=9606 GN=PARK7 PE=1 SV=2	22936.9|24916.9	11	8.84261	-0.203153	29.9378	-1.45937	0.171404	0.999947	-4.45018	CA	no_hit
COX20	Q5RI15|Q5RI15-2	Cytochrome c oxidase assembly protein COX20, mitochondrial OS=Homo sapiens OX=9606 GN=COX20 PE=1 SV=2|Isoform 2 of Cytochrome c oxidase assembly protein COX20, mitochondrial OS=Homo sapiens OX=9606 GN=COX20	15640.3|17378.2	3	7.3586	0.150454	26.111	1.45917	0.171459	0.999947	-4.45028	CA	no_hit
MRPL19	P49406	39S ribosomal protein L19, mitochondrial OS=Homo sapiens OX=9606 GN=MRPL19 PE=1 SV=2	40187	11	7.80891	0.210874	29.768	1.45756	0.171892	0.999947	-4.45102	CA	no_hit
ACAT2	Q9BWD1|Q9BWD1-2	Acetyl-CoA acetyltransferase, cytosolic OS=Homo sapiens OX=9606 GN=ACAT2 PE=1 SV=2|Isoform 2 of Acetyl-CoA acetyltransferase, cytosolic OS=Homo sapiens OX=9606 GN=ACAT2|Isoform 2 of Acetyl-CoA acetyltransferase, cytosolic OS=Homo sapiens OX=9606 GN=ACAT2	48225.9|51572.8	9	8.03932	-0.148748	29.0494	-1.4563	0.172235	0.999947	-4.45161	CA	no_hit
KATNA1	O75449	Katanin p60 ATPase-containing subunit A1 OS=Homo sapiens OX=9606 GN=KATNA1 PE=1 SV=1	67774.3	6	6.90426	0.206161	26.6516	1.45515	0.172547	0.999947	-4.45214	CA	no_hit
IFI16	Q16666|Q16666-2|Q16666-3|Q16666-6	Gamma-interferon-inducible protein 16 OS=Homo sapiens OX=9606 GN=IFI16 PE=1 SV=3|Isoform 2 of Gamma-interferon-inducible protein 16 OS=Homo sapiens OX=9606 GN=IFI16|Isoform 3 of Gamma-interferon-inducible protein 16 OS=Homo sapiens OX=9606 GN=IFI16|Isoform 4 of Gamma-interferon-inducible protein 16 OS=Homo sapiens OX=9606 GN=IFI16	115730.0|108662.0|101593.0|107633.0	7	6.64682	0.281922	26.6885	1.45482	0.172637	0.999947	-4.4523	CA	no_hit
TAF5	Q15542|Q15542-2	Transcription initiation factor TFIID subunit 5 OS=Homo sapiens OX=9606 GN=TAF5 PE=1 SV=3|Isoform Short of Transcription initiation factor TFIID subunit 5 OS=Homo sapiens OX=9606 GN=TAF5	100675.0|93995.4	5	6.54152	0.23604	26.2958	1.45461	0.172692	0.999947	-4.45239	CA	no_hit
GOLGA5	Q8TBA6|Q8TBA6-2	Golgin subfamily A member 5 OS=Homo sapiens OX=9606 GN=GOLGA5 PE=1 SV=3|Golgin subfamily A member 5 OS=Homo sapiens OX=9606 GN=GOLGA5 PE=1 SV=3|Isoform 2 of Golgin subfamily A member 5 OS=Homo sapiens OX=9606 GN=GOLGA5	98241.2|93081.3	22	7.42966	0.212613	29.5094	1.45371	0.172936	0.999947	-4.45281	CA	no_hit
IFT81	H0YHE2|Q8WYA0	Intraflagellar transport protein 81 homolog (Fragment) OS=Homo sapiens OX=9606 GN=IFT81 PE=1 SV=1|Intraflagellar transport protein 81 homolog OS=Homo sapiens OX=9606 GN=IFT81 PE=1 SV=1|Intraflagellar transport protein 81 homolog OS=Homo sapiens OX=9606 GN=IFT81 PE=1 SV=1	94707.8|104374.0	10	6.78019	-0.1243	27.168	-1.45216	0.173359	0.999947	-4.45352	CA	no_hit
PLEKHF2	Q9H8W4	Pleckstrin homology domain-containing family F member 2 OS=Homo sapiens OX=9606 GN=PLEKHF2 PE=1 SV=1	34852.4	2	6.96617	0.157066	25.5742	1.45075	0.173743	0.999947	-4.45418	CA	no_hit
CHMP6	I3L4A1|I3L4G8|Q96FZ7	Charged multivesicular body protein 6 (Fragment) OS=Homo sapiens OX=9606 GN=CHMP6 PE=1 SV=1|Charged multivesicular body protein 6 (Fragment) OS=Homo sapiens OX=9606 GN=CHMP6 PE=1 SV=1|Charged multivesicular body protein 6 OS=Homo sapiens OX=9606 GN=CHMP6 PE=1 SV=3|Charged multivesicular body protein 6 OS=Homo sapiens OX=9606 GN=CHMP6 PE=1 SV=3	29991.0|23614.7|28090.4	4	7.22656	0.221109	26.5808	1.45025	0.173882	0.999947	-4.45441	CA	no_hit
TYMS	P04818	Thymidylate synthase OS=Homo sapiens OX=9606 GN=TYMS PE=1 SV=3	40541.4	10	7.64199	-0.144247	28.38	-1.45005	0.173936	0.999947	-4.4545	CA	no_hit
HMGN1	A6NEL0|A6NL93|P05114	Non-histone chromosomal protein HMG-14 OS=Homo sapiens OX=9606 GN=HMGN1 PE=1 SV=1|Non-histone chromosomal protein HMG-14 OS=Homo sapiens OX=9606 GN=HMGN1 PE=1 SV=1|Non-histone chromosomal protein HMG-14 OS=Homo sapiens OX=9606 GN=HMGN1 PE=1 SV=3	18207.3|15614.1|17040.9	3	7.18555	0.510427	26.0772	1.44952	0.174081	0.999947	-4.45475	CA	no_hit
TTLL12	Q14166	Tubulin--tyrosine ligase-like protein 12 OS=Homo sapiens OX=9606 GN=TTLL12 PE=1 SV=2	82151.1	15	7.53714	-0.179256	28.2236	-1.44805	0.174482	0.999947	-4.45543	CA	no_hit
DCTN5	H3BR94|Q9BTE1|Q9BTE1-2	Dynactin subunit 5 OS=Homo sapiens OX=9606 GN=DCTN5 PE=1 SV=1|Dynactin subunit 5 OS=Homo sapiens OX=9606 GN=DCTN5 PE=1 SV=1|Isoform 2 of Dynactin subunit 5 OS=Homo sapiens OX=9606 GN=DCTN5|Dynactin subunit 5 OS=Homo sapiens OX=9606 GN=DCTN5 PE=1 SV=1	20510.9|24334.0|20177.8	4	7.15205	-0.184652	25.6319	-1.44529	0.175241	0.999947	-4.4567	CA	no_hit
AASDHPPT	Q9NRN7	L-aminoadipate-semialdehyde dehydrogenase-phosphopantetheinyl transferase OS=Homo sapiens OX=9606 GN=AASDHPPT PE=1 SV=2	42369.5	11	7.83383	-0.139983	29.0913	-1.4451	0.175294	0.999947	-4.45679	CA	no_hit
LIG1	P18858|P18858-3	DNA ligase 1 OS=Homo sapiens OX=9606 GN=LIG1 PE=1 SV=1|DNA ligase 1 OS=Homo sapiens OX=9606 GN=LIG1 PE=1 SV=1|Isoform 3 of DNA ligase 1 OS=Homo sapiens OX=9606 GN=LIG1	123899.0|118264.0	23	7.66029	0.131359	29.9462	1.44354	0.175723	0.999947	-4.45751	CA	no_hit
CFAP36	Q96G28|Q96G28-2	Cilia- and flagella-associated protein 36 OS=Homo sapiens OX=9606 GN=CFAP36 PE=1 SV=2|Isoform 2 of Cilia- and flagella-associated protein 36 OS=Homo sapiens OX=9606 GN=CFAP36	49327.6|52226.1	3	6.31623	0.191244	25.002	1.44331	0.175785	0.999947	-4.45762	CA	no_hit
CPPED1	Q9BRF8	Serine/threonine-protein phosphatase CPPED1 OS=Homo sapiens OX=9606 GN=CPPED1 PE=1 SV=3	41952.1	7	7.83047	-0.162078	28.5098	-1.4427	0.175956	0.999947	-4.4579	CA	no_hit
KIF22	H3BRB3|Q14807|Q14807-2	Kinesin-like protein OS=Homo sapiens OX=9606 GN=KIF22 PE=1 SV=1|Kinesin-like protein KIF22 OS=Homo sapiens OX=9606 GN=KIF22 PE=1 SV=5|Isoform 2 of Kinesin-like protein KIF22 OS=Homo sapiens OX=9606 GN=KIF22	79859.9|85479.9|78111.0	8	6.83885	0.252197	27.8113	1.44104	0.176413	0.999947	-4.45866	CA	no_hit
PITPNM1	O00562|O00562-2	Membrane-associated phosphatidylinositol transfer protein 1 OS=Homo sapiens OX=9606 GN=PITPNM1 PE=1 SV=4|Isoform 2 of Membrane-associated phosphatidylinositol transfer protein 1 OS=Homo sapiens OX=9606 GN=PITPNM1	148072.0|148001.0	6	6.60886	0.123848	25.1146	1.43918	0.176927	0.999947	-4.45952	CA	no_hit
SNW1	Q13573	SNW domain-containing protein 1 OS=Homo sapiens OX=9606 GN=SNW1 PE=1 SV=1	77636.5	19	7.63244	0.314212	30.1469	1.43883	0.177026	0.999947	-4.45968	CA	no_hit
ENO3	P13929|P13929-2|P13929-3	Beta-enolase OS=Homo sapiens OX=9606 GN=ENO3 PE=1 SV=5|Isoform 2 of Beta-enolase OS=Homo sapiens OX=9606 GN=ENO3|Isoform 3 of Beta-enolase OS=Homo sapiens OX=9606 GN=ENO3|Beta-enolase OS=Homo sapiens OX=9606 GN=ENO3 PE=1 SV=5|Isoform 2 of Beta-enolase OS=Homo sapiens OX=9606 GN=ENO3	58555.1|55380.5|51994.3	2	7.1431	-0.20673	28.4564	-1.43766	0.17735	0.999947	-4.46022	CA	no_hit
INPP5K	Q9BT40|Q9BT40-2	Inositol polyphosphate 5-phosphatase K OS=Homo sapiens OX=9606 GN=INPP5K PE=1 SV=3|Isoform 2 of Inositol polyphosphate 5-phosphatase K OS=Homo sapiens OX=9606 GN=INPP5K	57541.2|48631.4	5	7.20095	0.179364	27.4474	1.43402	0.178363	0.999947	-4.4619	CA	no_hit
RIOK1	Q9BRS2	Serine/threonine-protein kinase RIO1 OS=Homo sapiens OX=9606 GN=RIOK1 PE=1 SV=2	83223.6	8	6.96476	0.184183	27.6232	1.43356	0.178493	0.999947	-4.46211	CA	no_hit
FAM169A	D6RB01|Q9Y6X4	Soluble lamin-associated protein of 75 kDa OS=Homo sapiens OX=9606 GN=FAM169A PE=1 SV=1|Soluble lamin-associated protein of 75 kDa OS=Homo sapiens OX=9606 GN=FAM169A PE=1 SV=2	79858.0|87723.1	8	7.0009	0.16392	27.7483	1.43247	0.178798	0.999947	-4.46261	CA	no_hit
C18orf32	Q8TCD1	UPF0729 protein C18orf32 OS=Homo sapiens OX=9606 GN=C18orf32 PE=3 SV=1	12181	3	7.50863	-0.181481	28.1808	-1.43097	0.179218	0.999947	-4.4633	CA	no_hit
G6PD	E7EUI8|P11413|P11413-2|P11413-3	Glucose-6-phosphate 1-dehydrogenase (Fragment) OS=Homo sapiens OX=9606 GN=G6PD PE=1 SV=8|Glucose-6-phosphate 1-dehydrogenase OS=Homo sapiens OX=9606 GN=G6PD PE=1 SV=4|Isoform Long of Glucose-6-phosphate 1-dehydrogenase OS=Homo sapiens OX=9606 GN=G6PD|Isoform 3 of Glucose-6-phosphate 1-dehydrogenase OS=Homo sapiens OX=9606 GN=G6PD	43578.8|68497.2|73121.5|71763.8	38	9.31074	-0.160527	32.9834	-1.43065	0.179308	0.999947	-4.46345	CA	no_hit
OTUD4	Q01804	OTU domain-containing protein 4 OS=Homo sapiens OX=9606 GN=OTUD4 PE=1 SV=4	146117	9	7.06512	0.216861	27.8938	1.4282	0.179996	0.999947	-4.46458	CA	no_hit
COMMD3	Q9UBI1	COMM domain-containing protein 3 OS=Homo sapiens OX=9606 GN=COMMD3 PE=1 SV=1	25711.5	6	7.08368	-0.196998	25.9609	-1.42591	0.180641	0.999947	-4.46563	CA	no_hit
WFS1	O76024	Wolframin OS=Homo sapiens OX=9606 GN=WFS1 PE=1 SV=2	115057	11	7.34779	0.12833	28.2804	1.42447	0.181046	0.999947	-4.46628	CA	no_hit
ANXA6	E5RK69|P08133|P08133-2	Annexin OS=Homo sapiens OX=9606 GN=ANXA6 PE=1 SV=1|Annexin A6 OS=Homo sapiens OX=9606 GN=ANXA6 PE=1 SV=3|Annexin OS=Homo sapiens OX=9606 GN=ANXA6 PE=1 SV=1|Annexin A6 OS=Homo sapiens OX=9606 GN=ANXA6 PE=1 SV=3|Isoform 2 of Annexin A6 OS=Homo sapiens OX=9606 GN=ANXA6	63170.9|91986.5|87930.4	25	7.74591	-0.190056	30.1908	-1.42399	0.181183	0.999947	-4.4665	CA	no_hit
C9orf78	Q9NZ63	Telomere length and silencing protein 1 homolog OS=Homo sapiens OX=9606 GN=C9orf78 PE=1 SV=1	43763	8	7.53594	-0.26604	28.3651	-1.42051	0.182169	0.999947	-4.4681	CA	no_hit
MTUS1	Q9ULD2|Q9ULD2-2	Microtubule-associated tumor suppressor 1 OS=Homo sapiens OX=9606 GN=MTUS1 PE=1 SV=2|Isoform 2 of Microtubule-associated tumor suppressor 1 OS=Homo sapiens OX=9606 GN=MTUS1|Isoform 2 of Microtubule-associated tumor suppressor 1 OS=Homo sapiens OX=9606 GN=MTUS1	178270.0|171017.0	24	7.58219	0.229192	30.3901	1.41857	0.182721	0.999947	-4.46899	CA	no_hit
TMEM120A	A0A024R4K9|A0A087WZA9|A0A087X266|Q9BXJ8|Q9BXJ8-2	Transmembrane protein 120A OS=Homo sapiens OX=9606 GN=TMEM120A PE=1 SV=1|Transmembrane protein 120A (Fragment) OS=Homo sapiens OX=9606 GN=TMEM120A PE=1 SV=1|Transmembrane protein 120A OS=Homo sapiens OX=9606 GN=TMEM120A PE=1 SV=1|Transmembrane protein 120A OS=Homo sapiens OX=9606 GN=TMEM120A PE=1 SV=1|Isoform 2 of Transmembrane protein 120A OS=Homo sapiens OX=9606 GN=TMEM120A	40770.2|24990.6|49138.7|47428.3|40798.2	3	6.89797	-0.146652	26.6584	-1.41709	0.183143	0.999947	-4.46966	CA	no_hit
BRD3	Q15059|Q15059-2	Bromodomain-containing protein 3 OS=Homo sapiens OX=9606 GN=BRD3 PE=1 SV=1|Isoform 2 of Bromodomain-containing protein 3 OS=Homo sapiens OX=9606 GN=BRD3|Bromodomain-containing protein 3 OS=Homo sapiens OX=9606 GN=BRD3 PE=1 SV=1	106243.0|80962.1	6	7.22056	0.159376	26.5524	1.41661	0.183281	0.999947	-4.46988	CA	no_hit
GOT1	P17174	Aspartate aminotransferase, cytoplasmic OS=Homo sapiens OX=9606 GN=GOT1 PE=1 SV=3	52835	19	8.18303	-0.126942	30.2942	-1.41451	0.18388	0.999947	-4.47084	CA	no_hit
GGACT	Q9BVM4	Gamma-glutamylaminecyclotransferase OS=Homo sapiens OX=9606 GN=GGACT PE=1 SV=2	17736	2	6.4127	0.234133	23.3438	1.41419	0.183972	0.999947	-4.47099	CA	no_hit
MRPS15	P82914	28S ribosomal protein S15, mitochondrial OS=Homo sapiens OX=9606 GN=MRPS15 PE=1 SV=1	39367.9	10	7.59359	0.22121	29.8425	1.41366	0.184125	0.999947	-4.47123	CA	no_hit
PGD	P52209|P52209-2	6-phosphogluconate dehydrogenase, decarboxylating OS=Homo sapiens OX=9606 GN=PGD PE=1 SV=3|Isoform 2 of 6-phosphogluconate dehydrogenase, decarboxylating OS=Homo sapiens OX=9606 GN=PGD	64266.4|62999.7	26	9.21236	-0.190334	32.4725	-1.41269	0.184403	0.999947	-4.47167	CA	no_hit
TGM2	P21980	Protein-glutamine gamma-glutamyltransferase 2 OS=Homo sapiens OX=9606 GN=TGM2 PE=1 SV=2	88154.7	29	8.96828	-0.17001	31.8178	-1.41047	0.18504	0.999947	-4.47269	CA	no_hit
CAB39	Q9Y376	Calcium-binding protein 39 OS=Homo sapiens OX=9606 GN=CAB39 PE=1 SV=1	49749.4	12	7.67784	-0.154213	28.8191	-1.40976	0.185247	0.999947	-4.47301	CA	no_hit
CCDC137	I3L0U5|Q6PK04	Coiled-coil domain-containing protein 137 (Fragment) OS=Homo sapiens OX=9606 GN=CCDC137 PE=1 SV=1|Coiled-coil domain-containing protein 137 OS=Homo sapiens OX=9606 GN=CCDC137 PE=1 SV=1	43904.3|43915.4	4	6.79292	0.529991	26.5788	1.4091	0.185436	0.999947	-4.47331	CA	no_hit
EIF4A1	J3KTN0|P60842	Eukaryotic initiation factor 4A-I (Fragment) OS=Homo sapiens OX=9606 GN=EIF4A1 PE=1 SV=1|Eukaryotic initiation factor 4A-I OS=Homo sapiens OX=9606 GN=EIF4A1 PE=1 SV=1	16692.1|52436.8	13	8.94707	-0.151922	31.4997	-1.40855	0.185596	0.999947	-4.47356	CA	no_hit
CPNE1	B0QZ18|F2Z2V0|Q99829	Copine-1 OS=Homo sapiens OX=9606 GN=CPNE1 PE=1 SV=1|Copine-1 (Fragment) OS=Homo sapiens OX=9606 GN=CPNE1 PE=1 SV=1|Copine-1 OS=Homo sapiens OX=9606 GN=CPNE1 PE=1 SV=1|Copine-1 (Fragment) OS=Homo sapiens OX=9606 GN=CPNE1 PE=1 SV=1|Copine-1 OS=Homo sapiens OX=9606 GN=CPNE1 PE=1 SV=1	67608.0|66221.3|66645.5	11	7.76038	-0.1611	29.2673	-1.40801	0.18575	0.999947	-4.47381	CA	no_hit
ACYP2	P14621	Acylphosphatase-2 OS=Homo sapiens OX=9606 GN=ACYP2 PE=1 SV=2	13927.5	3	6.92194	-0.203784	25.7115	-1.40568	0.186425	0.999947	-4.47487	CA	no_hit
DSTN	P60981	Destrin OS=Homo sapiens OX=9606 GN=DSTN PE=1 SV=3	25338	14	9.06604	-0.16756	30.8914	-1.40508	0.186601	0.999947	-4.47515	CA	no_hit
KDM5C	P41229|P41229-2|P41229-3|P41229-5	Lysine-specific demethylase 5C OS=Homo sapiens OX=9606 GN=KDM5C PE=1 SV=2|Isoform 2 of Lysine-specific demethylase 5C OS=Homo sapiens OX=9606 GN=KDM5C|Isoform 3 of Lysine-specific demethylase 5C OS=Homo sapiens OX=9606 GN=KDM5C|Isoform 5 of Lysine-specific demethylase 5C OS=Homo sapiens OX=9606 GN=KDM5C|Lysine-specific demethylase 5C OS=Homo sapiens OX=9606 GN=KDM5C PE=1 SV=2|Isoform 2 of Lysine-…	202321.0|201676.0|195644.0|202193.0	8	6.54563	-0.158953	26.2079	-1.40437	0.186804	0.999947	-4.47547	CA	no_hit
C9orf64	Q5T6V5	Queuosine salvage protein OS=Homo sapiens OX=9606 GN=C9orf64 PE=1 SV=1	45239.9	14	7.66706	-0.186164	29.3581	-1.40121	0.187725	0.999947	-4.47691	CA	no_hit
PHC3	Q8NDX5|Q8NDX5-2|Q8NDX5-7	Polyhomeotic-like protein 3 OS=Homo sapiens OX=9606 GN=PHC3 PE=1 SV=1|Isoform 2 of Polyhomeotic-like protein 3 OS=Homo sapiens OX=9606 GN=PHC3|Isoform 7 of Polyhomeotic-like protein 3 OS=Homo sapiens OX=9606 GN=PHC3	114803.0|112821.0|116425.0	3	6.69245	0.332716	26.9633	1.40051	0.187928	0.999947	-4.47722	CA	no_hit
PAIP1	Q9H074	Polyadenylate-binding protein-interacting protein 1 OS=Homo sapiens OX=9606 GN=PAIP1 PE=1 SV=1	59727.2	8	7.74846	0.222354	28.9718	1.39962	0.188189	0.999947	-4.47763	CA	no_hit
WDFY3	Q8IZQ1|Q8IZQ1-2	WD repeat and FYVE domain-containing protein 3 OS=Homo sapiens OX=9606 GN=WDFY3 PE=1 SV=2|Isoform 2 of WD repeat and FYVE domain-containing protein 3 OS=Homo sapiens OX=9606 GN=WDFY3	451226.0|448728.0	4	6.43644	-0.181667	25.5918	-1.39826	0.188586	0.999947	-4.47825	CA	no_hit
SLC4A1AP	A0A087X0M4|Q9BWU0	Kanadaptin OS=Homo sapiens OX=9606 GN=SLC4A1AP PE=1 SV=1|Kanadaptin OS=Homo sapiens OX=9606 GN=SLC4A1AP PE=1 SV=1|Kanadaptin OS=Homo sapiens OX=9606 GN=SLC4A1AP PE=1 SV=1	103658.0|110491.0	16	7.25835	0.179841	28.8243	1.39665	0.189059	0.999947	-4.47898	CA	no_hit
ZNF609	O15014	Zinc finger protein 609 OS=Homo sapiens OX=9606 GN=ZNF609 PE=1 SV=2	191291	5	6.80598	0.223336	26.9606	1.39617	0.189199	0.999947	-4.4792	CA	no_hit
IPO4	Q8TEX9|Q8TEX9-2	Importin-4 OS=Homo sapiens OX=9606 GN=IPO4 PE=1 SV=2|Isoform 2 of Importin-4 OS=Homo sapiens OX=9606 GN=IPO4	130218.0|130404.0	21	8.02657	-0.160794	29.6787	-1.39571	0.189333	0.999947	-4.4794	CA	no_hit
RNF2	Q99496|X6RFN3	E3 ubiquitin-protein ligase RING2 OS=Homo sapiens OX=9606 GN=RNF2 PE=1 SV=1|E3 ubiquitin-protein ligase RING2 (Fragment) OS=Homo sapiens OX=9606 GN=RNF2 PE=1 SV=2	45388.8|32279.6	3	6.34183	0.197472	25.4208	1.39533	0.189444	0.999947	-4.47958	CA	no_hit
IPO11	Q9UI26|Q9UI26-2|F8WDV0	Importin-11 OS=Homo sapiens OX=9606 GN=IPO11 PE=1 SV=1|Isoform 2 of Importin-11 OS=Homo sapiens OX=9606 GN=IPO11|Importin-11 OS=Homo sapiens OX=9606 GN=IPO11 PE=1 SV=1|Importin-11 OS=Homo sapiens OX=9606 GN=IPO11 PE=1 SV=1|Isoform 2 of Importin-11 OS=Homo sapiens OX=9606 GN=IPO11	127787.0|132922.0|112116.0	10	7.46792	-0.168448	28.2521	-1.39424	0.189764	0.999947	-4.48007	CA	no_hit
CTTNBP2NL	Q9P2B4	CTTNBP2 N-terminal-like protein OS=Homo sapiens OX=9606 GN=CTTNBP2NL PE=1 SV=2	86389.7	7	6.86624	0.174106	27.0956	1.39032	0.190922	0.999947	-4.48185	CA	no_hit
CFL2	Q9Y281	Cofilin-2 OS=Homo sapiens OX=9606 GN=CFL2 PE=1 SV=1	25835.7	9	8.01786	-0.168975	28.8129	-1.3893	0.191223	0.999947	-4.48231	CA	no_hit
MORF4L2	Q15014	Mortality factor 4-like protein 2 OS=Homo sapiens OX=9606 GN=MORF4L2 PE=1 SV=1	41471	4	6.82181	0.21497	25.9993	1.38753	0.191746	0.999947	-4.48311	CA	no_hit
TXN	P10599	Thioredoxin OS=Homo sapiens OX=9606 GN=TXN PE=1 SV=3	15665.3	7	8.58343	-0.233322	29.6326	-1.38735	0.1918	0.999947	-4.48319	CA	no_hit
UIMC1	Q96RL1|Q96RL1-3	BRCA1-A complex subunit RAP80 OS=Homo sapiens OX=9606 GN=UIMC1 PE=1 SV=2|Isoform 3 of BRCA1-A complex subunit RAP80 OS=Homo sapiens OX=9606 GN=UIMC1	98823.6|85225.6	4	6.69498	-0.241142	26.2846	-1.38734	0.191803	0.999947	-4.4832	CA	no_hit
GMPR2	A0A087WWM4|H0YNJ6|Q9P2T1|Q9P2T1-3|F8WAN9|H0YMB3	GMP reductase OS=Homo sapiens OX=9606 GN=GMPR2 PE=1 SV=1|GMP reductase OS=Homo sapiens OX=9606 GN=GMPR2 PE=1 SV=1|GMP reductase 2 OS=Homo sapiens OX=9606 GN=GMPR2 PE=1 SV=1|Isoform 3 of GMP reductase 2 OS=Homo sapiens OX=9606 GN=GMPR2|GMP reductase OS=Homo sapiens OX=9606 GN=GMPR2 PE=1 SV=1|GMP reductase OS=Homo sapiens OX=9606 GN=GMPR2 PE=1 SV=1|GMP reductase OS=Homo sapiens OX=9606 GN=GMPR2 PE=…	46614.9|55691.6|45968.4|42331.6|46362.7|41048.7	12	7.89543	-0.145112	28.8429	-1.38447	0.192656	0.999947	-4.48449	CA	no_hit
MTERF3	E5RIY4|Q96E29|Q96E29-2|Q96E29-3	Transcription termination factor 3, mitochondrial OS=Homo sapiens OX=9606 GN=MTERF3 PE=1 SV=1|Transcription termination factor 3, mitochondrial OS=Homo sapiens OX=9606 GN=MTERF3 PE=1 SV=2|Isoform 2 of Transcription termination factor 3, mitochondrial OS=Homo sapiens OX=9606 GN=MTERF3|Isoform 3 of Transcription termination factor 3, mitochondrial OS=Homo sapiens OX=9606 GN=MTERF3|Transcription ter…	25618.6|57789.8|46762.1|42911.2	6	6.92127	-0.145937	27.4638	-1.3838	0.192856	0.999947	-4.4848	CA	no_hit
PHC2	A0A0A0MSI2|B3KPJ4|Q8IXK0|Q8IXK0-2|Q8IXK0-4|Q8IXK0-5	Polyhomeotic-like protein 2 OS=Homo sapiens OX=9606 GN=PHC2 PE=1 SV=1|Polyhomeotic-like protein 2 OS=Homo sapiens OX=9606 GN=PHC2 PE=1 SV=1|Polyhomeotic-like protein 2 OS=Homo sapiens OX=9606 GN=PHC2 PE=1 SV=1|Isoform 2 of Polyhomeotic-like protein 2 OS=Homo sapiens OX=9606 GN=PHC2|Isoform 4 of Polyhomeotic-like protein 2 OS=Homo sapiens OX=9606 GN=PHC2|Isoform 5 of Polyhomeotic-like protein 2 OS…	98579.4|59459.4|101380.0|43741.4|98480.3|101479.0	5	6.94639	0.276692	27.6681	1.38263	0.193206	0.999947	-4.48533	CA	no_hit
MRPL39	Q9NYK5	39S ribosomal protein L39, mitochondrial OS=Homo sapiens OX=9606 GN=MRPL39 PE=1 SV=3	47109.2	14	7.62862	0.117652	29.4315	1.38229	0.193308	0.999947	-4.48548	CA	no_hit
NEK6	Q9HC98|Q9HC98-2|Q9HC98-3|Q9HC98-4	Serine/threonine-protein kinase Nek6 OS=Homo sapiens OX=9606 GN=NEK6 PE=1 SV=2|Isoform 2 of Serine/threonine-protein kinase Nek6 OS=Homo sapiens OX=9606 GN=NEK6|Isoform 3 of Serine/threonine-protein kinase Nek6 OS=Homo sapiens OX=9606 GN=NEK6|Isoform 4 of Serine/threonine-protein kinase Nek6 OS=Homo sapiens OX=9606 GN=NEK6	42953.6|47194.8|45117.9|45812.0	2	6.68194	-0.136877	26.0296	-1.38056	0.193825	0.999947	-4.48626	CA	no_hit
NQO1	P15559|P15559-2|P15559-3	NAD(P)H dehydrogenase [quinone] 1 OS=Homo sapiens OX=9606 GN=NQO1 PE=1 SV=1|Isoform 2 of NAD(P)H dehydrogenase [quinone] 1 OS=Homo sapiens OX=9606 GN=NQO1|Isoform 3 of NAD(P)H dehydrogenase [quinone] 1 OS=Homo sapiens OX=9606 GN=NQO1	38206.0|34027.8|33098.3	15	9.34355	-0.163948	31.5057	-1.38021	0.19393	0.999947	-4.48642	CA	no_hit
KHK	P50053-2|P50053	Isoform A of Ketohexokinase OS=Homo sapiens OX=9606 GN=KHK|Ketohexokinase OS=Homo sapiens OX=9606 GN=KHK PE=1 SV=2|Isoform A of Ketohexokinase OS=Homo sapiens OX=9606 GN=KHK	37367.8|37578.8	3	6.84821	-0.14477	24.5641	-1.37935	0.194186	0.999947	-4.4868	CA	no_hit
WBP2	A6NG10|K7EIJ0|K7EMC9|K7ENL2|Q969T9|Q969T9-2	WW domain-binding protein 2 OS=Homo sapiens OX=9606 GN=WBP2 PE=1 SV=2|WW domain-binding protein 2 (Fragment) OS=Homo sapiens OX=9606 GN=WBP2 PE=1 SV=1|WW domain-binding protein 2 OS=Homo sapiens OX=9606 GN=WBP2 PE=1 SV=1|WW domain-binding protein 2 OS=Homo sapiens OX=9606 GN=WBP2 PE=1 SV=1|WW domain-binding protein 2 OS=Homo sapiens OX=9606 GN=WBP2 PE=1 SV=1|Isoform 2 of WW domain-binding protein…	30163.2|21672.0|32209.3|28458.4|32745.6|27989.4	5	7.44925	-0.186332	27.7473	-1.37925	0.194217	0.999947	-4.48685	CA	no_hit
SUDS3	Q9H7L9	Sin3 histone deacetylase corepressor complex component SDS3 OS=Homo sapiens OX=9606 GN=SUDS3 PE=1 SV=2	48265.3	3	6.44083	0.206431	25.9063	1.3772	0.194832	0.999947	-4.48777	CA	no_hit
RAD18	Q9NS91	E3 ubiquitin-protein ligase RAD18 OS=Homo sapiens OX=9606 GN=RAD18 PE=1 SV=2	71644.5	7	6.78634	0.169042	27.3373	1.37565	0.195299	0.999947	-4.48847	CA	no_hit
ATXN10	Q9UBB4	Ataxin-10 OS=Homo sapiens OX=9606 GN=ATXN10 PE=1 SV=1	62105.5	18	7.73998	-0.166528	29.6739	-1.37492	0.19552	0.999947	-4.4888	CA	no_hit
KIF7	Q2M1P5	Kinesin-like protein KIF7 OS=Homo sapiens OX=9606 GN=KIF7 PE=1 SV=2	169051	3	8.09849	-0.143972	28.2223	-1.3742	0.195735	0.999947	-4.48912	CA	no_hit
MRPL15	Q9P015	39S ribosomal protein L15, mitochondrial OS=Homo sapiens OX=9606 GN=MRPL15 PE=1 SV=1	40262.5	9	7.59941	0.259158	28.1846	1.37408	0.195772	0.999947	-4.48918	CA	no_hit
HEATR6	K7EIX2|Q6AI08	HEAT repeat-containing protein 6 OS=Homo sapiens OX=9606 GN=HEATR6 PE=1 SV=1|HEAT repeat-containing protein 6 OS=Homo sapiens OX=9606 GN=HEATR6 PE=1 SV=1	135701.0|148966.0	3	6.70047	-0.215906	25.5548	-1.37361	0.195914	0.999947	-4.48939	CA	no_hit
GCLC	P48506	Glutamate--cysteine ligase catalytic subunit OS=Homo sapiens OX=9606 GN=GCLC PE=1 SV=2	85685.9	16	7.8624	-0.163022	29.9042	-1.37353	0.19594	0.999947	-4.48943	CA	no_hit
MOCS3	O95396	Adenylyltransferase and sulfurtransferase MOCS3 OS=Homo sapiens OX=9606 GN=MOCS3 PE=1 SV=1	55113.4	4	6.72556	-0.22189	26.4208	-1.3703	0.196917	0.999947	-4.49088	CA	no_hit
ENO1	P06733	Alpha-enolase OS=Homo sapiens OX=9606 GN=ENO1 PE=1 SV=2	59041.3	25	9.63212	-0.176162	32.7313	-1.3661	0.198194	0.999947	-4.49277	CA	no_hit
DPY19L3	Q6ZPD9|K7ELH8	Probable C-mannosyltransferase DPY19L3 OS=Homo sapiens OX=9606 GN=DPY19L3 PE=2 SV=1|Probable C-mannosyltransferase DPY19L3 OS=Homo sapiens OX=9606 GN=DPY19L3 PE=1 SV=1|Probable C-mannosyltransferase DPY19L3 OS=Homo sapiens OX=9606 GN=DPY19L3 PE=2 SV=1	94283.8|89326.2	4	6.28466	0.201898	24.1729	1.36486	0.198573	0.999947	-4.49332	CA	no_hit
ARHGDIA	P52565	Rho GDP-dissociation inhibitor 1 OS=Homo sapiens OX=9606 GN=ARHGDIA PE=1 SV=3	29029.7	9	8.80824	-0.22267	29.6391	-1.36417	0.198782	0.999947	-4.49363	CA	no_hit
EBP	Q15125	3-beta-hydroxysteroid-Delta(8),Delta(7)-isomerase OS=Homo sapiens OX=9606 GN=EBP PE=1 SV=3	28997.5	2	7.70803	-0.184146	26.1016	-1.36353	0.198978	0.999947	-4.49392	CA	no_hit
NDOR1	Q9UHB4|Q9UHB4-2|Q9UHB4-3|Q9UHB4-4	NADPH-dependent diflavin oxidoreductase 1 OS=Homo sapiens OX=9606 GN=NDOR1 PE=1 SV=1|Isoform 2 of NADPH-dependent diflavin oxidoreductase 1 OS=Homo sapiens OX=9606 GN=NDOR1|Isoform 3 of NADPH-dependent diflavin oxidoreductase 1 OS=Homo sapiens OX=9606 GN=NDOR1|Isoform 4 of NADPH-dependent diflavin oxidoreductase 1 OS=Homo sapiens OX=9606 GN=NDOR1	71112.0|72036.5|62809.9|70292.6	2	6.43605	0.172581	23.7624	1.36224	0.199372	0.999947	-4.49449	CA	no_hit
KIF15	Q9NS87|Q9NS87-2	Kinesin-like protein KIF15 OS=Homo sapiens OX=9606 GN=KIF15 PE=1 SV=1|Isoform 2 of Kinesin-like protein KIF15 OS=Homo sapiens OX=9606 GN=KIF15|Kinesin-like protein KIF15 OS=Homo sapiens OX=9606 GN=KIF15 PE=1 SV=1	202098.0|190340.0	16	6.9585	-0.160702	28.507	-1.36137	0.199641	0.999947	-4.49489	CA	no_hit
VPS53	Q5VIR6-4	Isoform 4 of Vacuolar protein sorting-associated protein 53 homolog OS=Homo sapiens OX=9606 GN=VPS53	115278	11	7.35057	-0.154491	28.4374	-1.3605	0.199907	0.999947	-4.49527	CA	no_hit
RPP38	P78345	Ribonuclease P protein subunit p38 OS=Homo sapiens OX=9606 GN=RPP38 PE=1 SV=2	42385.7	7	7.02913	0.227378	27.6522	1.36035	0.199954	0.999947	-4.49534	CA	no_hit
TARS1	P26639|P26639-2	Threonine--tRNA ligase 1, cytoplasmic OS=Homo sapiens OX=9606 GN=TARS1 PE=1 SV=3|Threonine--tRNA ligase 1, cytoplasmic OS=Homo sapiens OX=9606 GN=TARS1 PE=1 SV=3|Isoform 2 of Threonine--tRNA ligase 1, cytoplasmic OS=Homo sapiens OX=9606 GN=TARS1	102851.0|106636.0	32	8.7069	-0.166892	31.9087	-1.35783	0.200729	0.999947	-4.49647	CA	no_hit
SEC23IP	Q9Y6Y8	SEC23-interacting protein OS=Homo sapiens OX=9606 GN=SEC23IP PE=1 SV=1	129031	30	8.08835	0.120421	30.8633	1.35745	0.200846	0.999947	-4.49664	CA	no_hit
XPOT	O43592	Exportin-T OS=Homo sapiens OX=9606 GN=XPOT PE=1 SV=2	126967	19	7.71717	-0.166645	29.606	-1.35724	0.200909	0.999947	-4.49673	CA	no_hit
TPX2	Q9ULW0|Q9ULW0-2	Targeting protein for Xklp2 OS=Homo sapiens OX=9606 GN=TPX2 PE=1 SV=2|Isoform 2 of Targeting protein for Xklp2 OS=Homo sapiens OX=9606 GN=TPX2	116344.0|120861.0	12	7.27571	0.269335	28.5634	1.35539	0.201481	0.999947	-4.49756	CA	no_hit
DCK	P27707|D6RFG8	Deoxycytidine kinase OS=Homo sapiens OX=9606 GN=DCK PE=1 SV=1|Deoxycytidine kinase OS=Homo sapiens OX=9606 GN=DCK PE=1 SV=1|Deoxycytidine kinase OS=Homo sapiens OX=9606 GN=DCK PE=1 SV=1	36012.7|42425.9	5	7.16352	-0.160586	27.815	-1.35417	0.201858	0.999947	-4.4981	CA	no_hit
FMNL1	O95466-2	Isoform 2 of Formin-like protein 1 OS=Homo sapiens OX=9606 GN=FMNL1	142790	14	7.13176	0.168001	28.3161	1.35382	0.201969	0.999947	-4.49826	CA	no_hit
CC2D1B	Q5T0F9|Q5T0F9-2	Coiled-coil and C2 domain-containing protein 1B OS=Homo sapiens OX=9606 GN=CC2D1B PE=1 SV=1|Isoform 2 of Coiled-coil and C2 domain-containing protein 1B OS=Homo sapiens OX=9606 GN=CC2D1B	109909.0|109280.0	9	6.98038	0.199021	28.135	1.35307	0.202201	0.999947	-4.4986	CA	no_hit
MRPS25	P82663	28S ribosomal protein S25, mitochondrial OS=Homo sapiens OX=9606 GN=MRPS25 PE=1 SV=1	25502.9	4	7.7238	0.146328	27.7986	1.35185	0.202578	0.999947	-4.49914	CA	no_hit
CTDP1	Q9Y5B0	RNA polymerase II subunit A C-terminal domain phosphatase OS=Homo sapiens OX=9606 GN=CTDP1 PE=1 SV=3	118689	9	6.86714	0.121429	26.8082	1.3507	0.202935	0.999947	-4.49965	CA	no_hit
YKT6	O15498	Synaptobrevin homolog YKT6 OS=Homo sapiens OX=9606 GN=YKT6 PE=1 SV=1	27137.6	10	7.92156	-0.183511	29.4303	-1.35029	0.203064	0.999947	-4.49984	CA	no_hit
NOCT	Q9UK39	Nocturnin OS=Homo sapiens OX=9606 GN=NOCT PE=1 SV=2	53640.7	5	6.7702	-0.132293	25.7795	-1.34893	0.203488	0.999947	-4.50044	CA	no_hit
KYNU	Q16719	Kynureninase OS=Homo sapiens OX=9606 GN=KYNU PE=1 SV=1	64391.3	21	8.80456	-0.163912	31.3248	-1.34822	0.203709	0.999947	-4.50076	CA	no_hit
VAV2	P52735-2|P52735-3|P52735	Isoform 2 of Guanine nucleotide exchange factor VAV2 OS=Homo sapiens OX=9606 GN=VAV2|Isoform 3 of Guanine nucleotide exchange factor VAV2 OS=Homo sapiens OX=9606 GN=VAV2|Guanine nucleotide exchange factor VAV2 OS=Homo sapiens OX=9606 GN=VAV2 PE=1 SV=2|Isoform 2 of Guanine nucleotide exchange factor VAV2 OS=Homo sapiens OX=9606 GN=VAV2|Isoform 3 of Guanine nucleotide exchange factor VAV2 OS=Homo s…	121020.0|117941.0|122556.0	11	7.29195	-0.147005	27.9598	-1.34796	0.203791	0.999947	-4.50088	CA	no_hit
USP11	G5E9A6|P51784	Ubiquitin carboxyl-terminal hydrolase OS=Homo sapiens OX=9606 GN=USP11 PE=1 SV=1|Ubiquitin carboxyl-terminal hydrolase OS=Homo sapiens OX=9606 GN=USP11 PE=1 SV=1|Ubiquitin carboxyl-terminal hydrolase 11 OS=Homo sapiens OX=9606 GN=USP11 PE=1 SV=3	119681.0|124634.0	13	7.33753	0.126004	28.0571	1.34636	0.20429	0.999947	-4.50159	CA	no_hit
DHFR	B4DM58|P00374	Dihydrofolate reductase OS=Homo sapiens OX=9606 GN=DHFR PE=1 SV=1|Dihydrofolate reductase OS=Homo sapiens OX=9606 GN=DHFR PE=1 SV=2|Dihydrofolate reductase OS=Homo sapiens OX=9606 GN=DHFR PE=1 SV=2	17646.7|26667.6	9	7.21286	-0.133313	27.6733	-1.34604	0.204388	0.999947	-4.50173	CA	no_hit
HARS1	P12081	Histidine--tRNA ligase, cytoplasmic OS=Homo sapiens OX=9606 GN=HARS1 PE=1 SV=2	71025.3	22	8.1751	-0.153036	30.8024	-1.34603	0.204393	0.999947	-4.50174	CA	no_hit
MTERF4	Q7Z6M4	Transcription termination factor 4, mitochondrial OS=Homo sapiens OX=9606 GN=MTERF4 PE=1 SV=3	51496.9	3	6.58763	0.246949	25.3848	1.34497	0.204724	0.999947	-4.50221	CA	no_hit
RPRD2	Q5VT52|Q5VT52-2	Regulation of nuclear pre-mRNA domain-containing protein 2 OS=Homo sapiens OX=9606 GN=RPRD2 PE=1 SV=1|Isoform 2 of Regulation of nuclear pre-mRNA domain-containing protein 2 OS=Homo sapiens OX=9606 GN=RPRD2	182846.0|178808.0	17	7.40857	0.163103	28.4056	1.34491	0.204743	0.999947	-4.50223	CA	no_hit
PDSS1	Q5T2R2|Q5T2R2-3	Decaprenyl-diphosphate synthase subunit 1 OS=Homo sapiens OX=9606 GN=PDSS1 PE=1 SV=1|Isoform 3 of Decaprenyl-diphosphate synthase subunit 1 OS=Homo sapiens OX=9606 GN=PDSS1	54350.3|49819.9	7	6.76772	-0.158168	26.2322	-1.344	0.205028	0.999947	-4.50264	CA	no_hit
IRF2BPL	Q9H1B7	Probable E3 ubiquitin-protein ligase IRF2BPL OS=Homo sapiens OX=9606 GN=IRF2BPL PE=1 SV=1	93006.8	6	6.70369	0.175574	26.2347	1.34362	0.205148	0.999947	-4.50281	CA	no_hit
SOD1	P00441	Superoxide dismutase [Cu-Zn] OS=Homo sapiens OX=9606 GN=SOD1 PE=1 SV=2	19500.3	10	8.81033	-0.194431	29.3871	-1.34331	0.205245	0.999947	-4.50294	CA	no_hit
SNRPB	P14678|P14678-2|P14678-3	Small nuclear ribonucleoprotein-associated proteins B and B' OS=Homo sapiens OX=9606 GN=SNRPB PE=1 SV=2|Isoform SM-B of Small nuclear ribonucleoprotein-associated proteins B and B' OS=Homo sapiens OX=9606 GN=SNRPB|Isoform SM-B1 of Small nuclear ribonucleoprotein-associated proteins B and B' OS=Homo sapiens OX=9606 GN=SNRPB	27806.8|26853.4|33510.4	5	7.87015	0.319591	28.6064	1.34234	0.20555	0.999947	-4.50338	CA	no_hit
COMMD4	H3BM91|Q9H0A8	COMM domain-containing protein 4 (Fragment) OS=Homo sapiens OX=9606 GN=COMMD4 PE=1 SV=1|COMM domain-containing protein 4 OS=Homo sapiens OX=9606 GN=COMMD4 PE=1 SV=1	26855.4|26047.1	6	7.55534	-0.158855	28.1607	-1.34111	0.205938	0.999947	-4.50392	CA	no_hit
EZR	E7EQR4|P15311	Ezrin OS=Homo sapiens OX=9606 GN=EZR PE=1 SV=3|Ezrin OS=Homo sapiens OX=9606 GN=EZR PE=1 SV=4|Ezrin OS=Homo sapiens OX=9606 GN=EZR PE=1 SV=4	85869.9|86215.2	35	9.08573	-0.1777	32.193	-1.34094	0.205991	0.999947	-4.504	CA	no_hit
CC2D1A	Q6P1N0|Q6P1N0-2	Coiled-coil and C2 domain-containing protein 1A OS=Homo sapiens OX=9606 GN=CC2D1A PE=1 SV=1|Isoform 2 of Coiled-coil and C2 domain-containing protein 1A OS=Homo sapiens OX=9606 GN=CC2D1A	121737.0|121609.0	20	7.14389	0.249349	28.9856	1.34084	0.206021	0.999947	-4.50404	CA	no_hit
METTL7B	A0A087WZT2|Q6UX53	Methyltransferase-like protein 7B OS=Homo sapiens OX=9606 GN=METTL7B PE=1 SV=1|Methyltransferase-like protein 7B OS=Homo sapiens OX=9606 GN=METTL7B PE=1 SV=2	36704.6|32832.6	8	8.03107	-0.196354	29.2459	-1.34077	0.206045	0.999947	-4.50407	CA	no_hit
MTM1	Q13496	Myotubularin OS=Homo sapiens OX=9606 GN=MTM1 PE=1 SV=2	80743.8	12	7.15132	-0.135785	27.9186	-1.34062	0.206091	0.999947	-4.50414	CA	no_hit
GLRX3	O76003	Glutaredoxin-3 OS=Homo sapiens OX=9606 GN=GLRX3 PE=1 SV=2	46515.4	11	8.30138	-0.181178	29.357	-1.34013	0.206244	0.999947	-4.50436	CA	no_hit
QRICH1	Q2TAL8	Glutamine-rich protein 1 OS=Homo sapiens OX=9606 GN=QRICH1 PE=1 SV=1	95964.3	6	7.00691	0.167317	27.2892	1.33959	0.206415	0.999947	-4.5046	CA	no_hit
GAN	Q9H2C0	Gigaxonin OS=Homo sapiens OX=9606 GN=GAN PE=1 SV=1	77500.1	9	7.13887	-0.137223	28.0719	-1.33893	0.206624	0.999947	-4.50489	CA	no_hit
KAT8	Q9H7Z6|Q9H7Z6-2	Histone acetyltransferase KAT8 OS=Homo sapiens OX=9606 GN=KAT8 PE=1 SV=2|Isoform 2 of Histone acetyltransferase KAT8 OS=Homo sapiens OX=9606 GN=KAT8	65963.8|64820.8	3	6.50859	0.194017	26.4185	1.33839	0.206795	0.999947	-4.50513	CA	no_hit
HMMR	O75330|O75330-2|O75330-3|O75330-4	Hyaluronan mediated motility receptor OS=Homo sapiens OX=9606 GN=HMMR PE=1 SV=2|Isoform 2 of Hyaluronan mediated motility receptor OS=Homo sapiens OX=9606 GN=HMMR|Isoform 3 of Hyaluronan mediated motility receptor OS=Homo sapiens OX=9606 GN=HMMR|Isoform 4 of Hyaluronan mediated motility receptor OS=Homo sapiens OX=9606 GN=HMMR|Hyaluronan mediated motility receptor OS=Homo sapiens OX=9606 GN=HMMR …	114260.0|111245.0|114692.0|99735.8	13	6.96906	0.321078	28.2312	1.33757	0.207052	0.999947	-4.50549	CA	no_hit
NAA25	Q14CX7	N-alpha-acetyltransferase 25, NatB auxiliary subunit OS=Homo sapiens OX=9606 GN=NAA25 PE=1 SV=1	136861	26	7.63021	-0.188831	29.9579	-1.33603	0.207542	0.999947	-4.50618	CA	no_hit
RBM42	K7EP90|Q9BTD8|Q9BTD8-2|Q9BTD8-3|Q9BTD8-4	RNA-binding protein 42 OS=Homo sapiens OX=9606 GN=RBM42 PE=1 SV=1|RNA-binding protein 42 OS=Homo sapiens OX=9606 GN=RBM42 PE=1 SV=1|Isoform 2 of RNA-binding protein 42 OS=Homo sapiens OX=9606 GN=RBM42|Isoform 3 of RNA-binding protein 42 OS=Homo sapiens OX=9606 GN=RBM42|Isoform 4 of RNA-binding protein 42 OS=Homo sapiens OX=9606 GN=RBM42	56017.0|58405.4|55314.7|55385.7|55018.6	6	7.3829	0.187462	26.1809	1.33478	0.207938	0.999947	-4.50673	CA	no_hit
CARS1	P49589-3	Isoform 3 of Cysteine--tRNA ligase, cytoplasmic OS=Homo sapiens OX=9606 GN=CARS1	115758	31	8.15317	-0.180435	30.8444	-1.3347	0.207963	0.999947	-4.50677	CA	no_hit
GATD1	Q8NB37|Q8NB37-2	Glutamine amidotransferase-like class 1 domain-containing protein 1 OS=Homo sapiens OX=9606 GN=GATD1 PE=1 SV=1|Isoform 2 of Glutamine amidotransferase-like class 1 domain-containing protein 1 OS=Homo sapiens OX=9606 GN=GATD1|Glutamine amidotransferase-like class 1 domain-containing protein 1 OS=Homo sapiens OX=9606 GN=GATD1 PE=1 SV=1	25621.0|29828.0	5	7.12148	-0.153629	26.6209	-1.33291	0.208532	0.999947	-4.50756	CA	no_hit
YARS1	P54577	Tyrosine--tRNA ligase, cytoplasmic OS=Homo sapiens OX=9606 GN=YARS1 PE=1 SV=4	78004.9	28	8.34368	-0.148824	31.1461	-1.33166	0.208931	0.999947	-4.50811	CA	no_hit
HERC4	Q5GLZ8|Q5GLZ8-2|Q5GLZ8-6	Probable E3 ubiquitin-protein ligase HERC4 OS=Homo sapiens OX=9606 GN=HERC4 PE=1 SV=1|Isoform 2 of Probable E3 ubiquitin-protein ligase HERC4 OS=Homo sapiens OX=9606 GN=HERC4|Isoform 6 of Probable E3 ubiquitin-protein ligase HERC4 OS=Homo sapiens OX=9606 GN=HERC4|Probable E3 ubiquitin-protein ligase HERC4 OS=Homo sapiens OX=9606 GN=HERC4 PE=1 SV=1|Isoform 2 of Probable E3 ubiquitin-protein ligase…	139991.0|139125.0|126096.0	20	7.50591	-0.134849	29.2696	-1.3316	0.208949	0.999947	-4.50814	CA	no_hit
MRPS10	P82664	28S ribosomal protein S10, mitochondrial OS=Homo sapiens OX=9606 GN=MRPS10 PE=1 SV=2	28270.6	4	7.07323	0.21869	27.6001	1.33149	0.208982	0.999947	-4.50819	CA	no_hit
USP32	K7EQL6|Q8NFA0	Ubiquitin carboxyl-terminal hydrolase 32 OS=Homo sapiens OX=9606 GN=USP32 PE=1 SV=1|Ubiquitin carboxyl-terminal hydrolase 32 OS=Homo sapiens OX=9606 GN=USP32 PE=1 SV=1|Ubiquitin carboxyl-terminal hydrolase 32 OS=Homo sapiens OX=9606 GN=USP32 PE=1 SV=1	166966.0|211504.0	4	6.35626	-0.166298	24.99	-1.32931	0.20968	0.999947	-4.50915	CA	no_hit
CDC42EP4	Q9H3Q1	Cdc42 effector protein 4 OS=Homo sapiens OX=9606 GN=CDC42EP4 PE=1 SV=1	43489.3	6	6.75539	-0.18615	25.6643	-1.32873	0.209865	0.999947	-4.50941	CA	no_hit
MEMO1	Q9Y316|Q9Y316-3	Protein MEMO1 OS=Homo sapiens OX=9606 GN=MEMO1 PE=1 SV=1|Isoform 3 of Protein MEMO1 OS=Homo sapiens OX=9606 GN=MEMO1	38065.3|38929.9	8	7.76577	-0.141417	28.1013	-1.3278	0.210162	0.999947	-4.50982	CA	no_hit
CNOT2	F8VUB4|F8VV52|Q9NZN8	CCR4-NOT transcription complex subunit 2 OS=Homo sapiens OX=9606 GN=CNOT2 PE=1 SV=2|CCR4-NOT transcription complex subunit 2 (Fragment) OS=Homo sapiens OX=9606 GN=CNOT2 PE=1 SV=1|CCR4-NOT transcription complex subunit 2 OS=Homo sapiens OX=9606 GN=CNOT2 PE=1 SV=1	63638.0|65142.8|66259.4	10	7.3651	0.165868	28.9475	1.32295	0.211719	0.999947	-4.51196	CA	no_hit
CARD19	Q96LW7-2	Isoform 2 of Caspase recruitment domain-containing protein 19 OS=Homo sapiens OX=9606 GN=CARD19	22114.6	3	6.8145	0.171464	25.307	1.32173	0.212112	0.999947	-4.5125	CA	no_hit
RRM1	P23921	Ribonucleoside-diphosphate reductase large subunit OS=Homo sapiens OX=9606 GN=RRM1 PE=1 SV=1	108873	29	8.39791	-0.177375	30.729	-1.32047	0.212519	0.999947	-4.51305	CA	no_hit
SPAG7	O75391	Sperm-associated antigen 7 OS=Homo sapiens OX=9606 GN=SPAG7 PE=1 SV=2	34041.7	6	7.26021	0.219298	26.9733	1.32026	0.212587	0.999947	-4.51314	CA	no_hit
ANXA3	P12429	Annexin A3 OS=Homo sapiens OX=9606 GN=ANXA3 PE=1 SV=3	44433.1	18	8.31686	-0.161324	30.3457	-1.31992	0.212698	0.999947	-4.5133	CA	no_hit
TTC5	Q8N0Z6	Tetratricopeptide repeat protein 5 OS=Homo sapiens OX=9606 GN=TTC5 PE=1 SV=2	58365.2	4	6.68476	-0.13678	26.1594	-1.3189	0.213025	0.999947	-4.51374	CA	no_hit
PPP1R10	Q96QC0	Serine/threonine-protein phosphatase 1 regulatory subunit 10 OS=Homo sapiens OX=9606 GN=PPP1R10 PE=1 SV=1	119112	13	7.35048	0.327373	29.1195	1.31863	0.213115	0.999947	-4.51386	CA	no_hit
EML1	A0A3B3IU69|F8W717|O00423|O00423-3	Echinoderm microtubule-associated protein-like 1 OS=Homo sapiens OX=9606 GN=EML1 PE=1 SV=1|Echinoderm microtubule-associated protein-like 1 OS=Homo sapiens OX=9606 GN=EML1 PE=1 SV=1|Echinoderm microtubule-associated protein-like 1 OS=Homo sapiens OX=9606 GN=EML1 PE=1 SV=3|Isoform 3 of Echinoderm microtubule-associated protein-like 1 OS=Homo sapiens OX=9606 GN=EML1	109287.0|104233.0|105072.0|107556.0	14	7.1486	-0.125512	28.4391	-1.31746	0.213493	0.999947	-4.51438	CA	no_hit
TOE1	Q96GM8|Q96GM8-2	Target of EGR1 protein 1 OS=Homo sapiens OX=9606 GN=TOE1 PE=1 SV=1|Isoform 2 of Target of EGR1 protein 1 OS=Homo sapiens OX=9606 GN=TOE1|Target of EGR1 protein 1 OS=Homo sapiens OX=9606 GN=TOE1 PE=1 SV=1	66189.3|55236.1	3	6.6583	0.185228	26.786	1.31739	0.213517	0.999947	-4.51441	CA	no_hit
GPAT3	Q53EU6	Glycerol-3-phosphate acyltransferase 3 OS=Homo sapiens OX=9606 GN=GPAT3 PE=1 SV=2	58312.9	8	7.15097	-0.16753	27.7351	-1.31734	0.21353	0.999947	-4.51443	CA	no_hit
AKT2	P31751	RAC-beta serine/threonine-protein kinase OS=Homo sapiens OX=9606 GN=AKT2 PE=1 SV=2	65562.7	15	7.73288	-0.144876	29.7053	-1.31593	0.213988	0.999947	-4.51505	CA	no_hit
NHEJ1	H7C0G7|Q9H9Q4	Non-homologous end-joining factor 1 (Fragment) OS=Homo sapiens OX=9606 GN=NHEJ1 PE=1 SV=1|Non-homologous end-joining factor 1 OS=Homo sapiens OX=9606 GN=NHEJ1 PE=1 SV=1	28423.8|38278.2	2	6.61708	0.17004	24.7173	1.31538	0.214169	0.999947	-4.51529	CA	no_hit
CCDC9	A0A2R8Y4Z8|Q9Y3X0	Coiled-coil domain-containing protein 9 OS=Homo sapiens OX=9606 GN=CCDC9 PE=1 SV=1|Coiled-coil domain-containing protein 9 OS=Homo sapiens OX=9606 GN=CCDC9 PE=1 SV=1	73652.4|67690.5	7	7.12543	0.347011	27.9407	1.31408	0.21459	0.999947	-4.51586	CA	no_hit
MRPS18A	Q5QPA5|Q9NVS2|Q9NVS2-2	39S ribosomal protein S18a, mitochondrial (Fragment) OS=Homo sapiens OX=9606 GN=MRPS18A PE=1 SV=9|39S ribosomal protein S18a, mitochondrial OS=Homo sapiens OX=9606 GN=MRPS18A PE=1 SV=1|Isoform 2 of 39S ribosomal protein S18a, mitochondrial OS=Homo sapiens OX=9606 GN=MRPS18A	34252.7|26770.8|35482.4	7	7.52151	0.20699	28.6544	1.3137	0.214713	0.999947	-4.51603	CA	no_hit
SMC2	O95347	Structural maintenance of chromosomes protein 2 OS=Homo sapiens OX=9606 GN=SMC2 PE=1 SV=2	180499	47	8.00928	-0.154584	31.5853	-1.31334	0.214831	0.999947	-4.51618	CA	no_hit
PIKFYVE	Q9Y2I7	1-phosphatidylinositol 3-phosphate 5-kinase OS=Homo sapiens OX=9606 GN=PIKFYVE PE=1 SV=3	278243	3	6.21335	-0.140099	24.2564	-1.31289	0.214978	0.999947	-4.51638	CA	no_hit
IFT74	Q96LB3	Intraflagellar transport protein 74 homolog OS=Homo sapiens OX=9606 GN=IFT74 PE=1 SV=1	87258.4	12	6.91864	0.207095	27.5185	1.31282	0.215002	0.999947	-4.51642	CA	no_hit
IPO5	O00410|O00410-3	Importin-5 OS=Homo sapiens OX=9606 GN=IPO5 PE=1 SV=4|Isoform 3 of Importin-5 OS=Homo sapiens OX=9606 GN=IPO5	142981.0|145199.0	32	8.29694	-0.157612	30.7615	-1.31194	0.215287	0.999947	-4.5168	CA	no_hit
PSMG3	Q9BT73	Proteasome assembly chaperone 3 OS=Homo sapiens OX=9606 GN=PSMG3 PE=1 SV=1	16005	2	6.65655	-0.164713	24.4221	-1.31155	0.215417	0.999947	-4.51697	CA	no_hit
IDE	A0A3B3ISG5|P14735	Insulin-degrading enzyme OS=Homo sapiens OX=9606 GN=IDE PE=1 SV=1|Insulin-degrading enzyme OS=Homo sapiens OX=9606 GN=IDE PE=1 SV=4	142394.0|142116.0	37	8.09443	-0.170125	31.1313	-1.31124	0.215517	0.999947	-4.51711	CA	no_hit
DNAH3	Q8TD57	Dynein heavy chain 3, axonemal OS=Homo sapiens OX=9606 GN=DNAH3 PE=2 SV=1	565342	2	6.92633	0.230202	27.5777	1.31115	0.215547	0.999947	-4.51715	CA	no_hit
ARV1	A0A0A0MRI7|H7C484|Q9H2C2	Protein ARV1 OS=Homo sapiens OX=9606 GN=ARV1 PE=1 SV=1|Protein ARV1 (Fragment) OS=Homo sapiens OX=9606 GN=ARV1 PE=1 SV=1|Protein ARV1 OS=Homo sapiens OX=9606 GN=ARV1 PE=1 SV=1	31089.6|36829.9|37078.0	2	7.208	-0.135927	27.0775	-1.31105	0.215579	0.999947	-4.51719	CA	no_hit
TNFRSF10A	O00220	Tumor necrosis factor receptor superfamily member 10A OS=Homo sapiens OX=9606 GN=TNFRSF10A PE=1 SV=3	56425.7	4	7.09734	-0.249968	26.3866	-1.3109	0.215627	0.999947	-4.51726	CA	no_hit
PPP4R1	Q8TF05|Q8TF05-2	Serine/threonine-protein phosphatase 4 regulatory subunit 1 OS=Homo sapiens OX=9606 GN=PPP4R1 PE=1 SV=1|Isoform 2 of Serine/threonine-protein phosphatase 4 regulatory subunit 1 OS=Homo sapiens OX=9606 GN=PPP4R1	119921.0|118114.0	15	7.36783	-0.137448	28.9518	-1.31057	0.215736	0.999947	-4.5174	CA	no_hit
YEATS4	O95619|F8W0J4	YEATS domain-containing protein 4 OS=Homo sapiens OX=9606 GN=YEATS4 PE=1 SV=1|YEATS domain-containing protein 4 OS=Homo sapiens OX=9606 GN=YEATS4 PE=1 SV=1|YEATS domain-containing protein 4 OS=Homo sapiens OX=9606 GN=YEATS4 PE=1 SV=1	34144.9|26259.6	4	6.77939	0.167444	26.5977	1.30857	0.216391	0.999947	-4.51828	CA	no_hit
GSS	A0A2R8Y7I7|P48637	Glutathione synthetase (Fragment) OS=Homo sapiens OX=9606 GN=GSS PE=1 SV=1|Glutathione synthetase OS=Homo sapiens OX=9606 GN=GSS PE=1 SV=1	20073.1|59215.9	22	8.10942	-0.152002	30.1154	-1.30812	0.216539	0.999947	-4.51848	CA	no_hit
SMAD2	Q15796|Q15796-2	Mothers against decapentaplegic homolog 2 OS=Homo sapiens OX=9606 GN=SMAD2 PE=1 SV=1|Isoform Short of Mothers against decapentaplegic homolog 2 OS=Homo sapiens OX=9606 GN=SMAD2	59269.3|55863.8	5	7.08119	-0.147418	27.5935	-1.30791	0.216608	0.999947	-4.51857	CA	no_hit
GNA13	Q14344|Q14344-2	Guanine nucleotide-binding protein subunit alpha-13 OS=Homo sapiens OX=9606 GN=GNA13 PE=1 SV=2|Guanine nucleotide-binding protein subunit alpha-13 OS=Homo sapiens OX=9606 GN=GNA13 PE=1 SV=2|Isoform 2 of Guanine nucleotide-binding protein subunit alpha-13 OS=Homo sapiens OX=9606 GN=GNA13	51969.0|38304.4	13	7.7655	-0.165237	29.0876	-1.30577	0.217311	0.999947	-4.5195	CA	no_hit
ABI1	A0A0A0MRT6|B6VEX4|Q8IZP0|Q8IZP0-10|Q8IZP0-12|Q8IZP0-2|Q8IZP0-3|Q8IZP0-4|Q8IZP0-5|Q8IZP0-6|Q8IZP0-7|Q8IZP0-8|Q8IZP0-9	Abl interactor 1 OS=Homo sapiens OX=9606 GN=ABI1 PE=1 SV=1|Abl interactor 1 OS=Homo sapiens OX=9606 GN=ABI1 PE=1 SV=1|Abl interactor 1 OS=Homo sapiens OX=9606 GN=ABI1 PE=1 SV=4|Isoform 10 of Abl interactor 1 OS=Homo sapiens OX=9606 GN=ABI1|Isoform 12 of Abl interactor 1 OS=Homo sapiens OX=9606 GN=ABI1|Isoform 2 of Abl interactor 1 OS=Homo sapiens OX=9606 GN=ABI1|Isoform 3 of Abl interactor 1 OS=H…	57631.8|49770.1|61549.1|48535.3|60438.5|54542.1|55848.0|55776.9|57702.8|58866.6|52859.8|49784.1|58937.6	6	7.30415	0.149988	26.9372	1.30453	0.217718	0.999947	-4.52005	CA	no_hit
KNSTRN	Q9Y448|Q9Y448-2|V9GY01	Small kinetochore-associated protein OS=Homo sapiens OX=9606 GN=KNSTRN PE=1 SV=2|Isoform 2 of Small kinetochore-associated protein OS=Homo sapiens OX=9606 GN=KNSTRN|Chromosome 15 open reading frame 23, isoform CRA_d OS=Homo sapiens OX=9606 GN=KNSTRN PE=1 SV=1|Small kinetochore-associated protein OS=Homo sapiens OX=9606 GN=KNSTRN PE=1 SV=2|Chromosome 15 open reading frame 23, isoform CRA_d OS=Homo…	44219.1|39389.4|34989.5	2	6.41528	0.267809	24.8693	1.30327	0.218133	0.999947	-4.5206	CA	no_hit
ATG3	Q9NT62|Q9NT62-2	Ubiquitin-like-conjugating enzyme ATG3 OS=Homo sapiens OX=9606 GN=ATG3 PE=1 SV=1|Ubiquitin-like-conjugating enzyme ATG3 OS=Homo sapiens OX=9606 GN=ATG3 PE=1 SV=1|Isoform 2 of Ubiquitin-like-conjugating enzyme ATG3 OS=Homo sapiens OX=9606 GN=ATG3	42990.2|42593.1	12	7.88141	-0.136374	28.7455	-1.30322	0.218149	0.999947	-4.52062	CA	no_hit
NOSTRIN	Q8IVI9|Q8IVI9-2|Q8IVI9-4	Nostrin OS=Homo sapiens OX=9606 GN=NOSTRIN PE=1 SV=2|Isoform 2 of Nostrin OS=Homo sapiens OX=9606 GN=NOSTRIN|Isoform 4 of Nostrin OS=Homo sapiens OX=9606 GN=NOSTRIN	76389.1|71757.3|84229.3	4	6.49266	0.251631	25.8414	1.30296	0.218235	0.999947	-4.52073	CA	no_hit
GFM2	Q969S9|Q969S9-3	Ribosome-releasing factor 2, mitochondrial OS=Homo sapiens OX=9606 GN=GFM2 PE=1 SV=1|Isoform 3 of Ribosome-releasing factor 2, mitochondrial OS=Homo sapiens OX=9606 GN=GFM2	100482.0|100206.0	11	7.38582	-0.202934	28.3053	-1.30216	0.2185	0.999947	-4.52108	CA	no_hit
ALS2	Q96Q42	Alsin OS=Homo sapiens OX=9606 GN=ALS2 PE=1 SV=2	212113	3	6.62417	-0.246391	25.9279	-1.30211	0.218516	0.999947	-4.5211	CA	no_hit
ARID4B	Q4LE39|Q4LE39-2|Q4LE39-3	AT-rich interactive domain-containing protein 4B OS=Homo sapiens OX=9606 GN=ARID4B PE=1 SV=2|Isoform 2 of AT-rich interactive domain-containing protein 4B OS=Homo sapiens OX=9606 GN=ARID4B|AT-rich interactive domain-containing protein 4B OS=Homo sapiens OX=9606 GN=ARID4B PE=1 SV=2|Isoform 2 of AT-rich interactive domain-containing protein 4B OS=Homo sapiens OX=9606 GN=ARID4B|Isoform 3 of AT-rich …	195042.0|183211.0|172376.0	6	6.93354	0.146143	27.9284	1.30119	0.218823	0.999947	-4.52151	CA	no_hit
PYGL	P06737|P06737-2	Glycogen phosphorylase, liver form OS=Homo sapiens OX=9606 GN=PYGL PE=1 SV=4|Isoform 2 of Glycogen phosphorylase, liver form OS=Homo sapiens OX=9606 GN=PYGL	117260.0|113191.0	30	8.0227	-0.163554	30.8171	-1.30068	0.21899	0.999947	-4.52173	CA	no_hit
MRPL48	Q96GC5|Q96GC5-3	39S ribosomal protein L48, mitochondrial OS=Homo sapiens OX=9606 GN=MRPL48 PE=1 SV=2|Isoform 2 of 39S ribosomal protein L48, mitochondrial OS=Homo sapiens OX=9606 GN=MRPL48	30422.2|27629.5	7	7.80515	0.196771	27.971	1.30008	0.21919	0.999947	-4.52199	CA	no_hit
KIFAP3	Q92845|Q92845-2|Q92845-3|Q92845-4	Kinesin-associated protein 3 OS=Homo sapiens OX=9606 GN=KIFAP3 PE=1 SV=2|Isoform 2 of Kinesin-associated protein 3 OS=Homo sapiens OX=9606 GN=KIFAP3|Isoform 3 of Kinesin-associated protein 3 OS=Homo sapiens OX=9606 GN=KIFAP3|Isoform 4 of Kinesin-associated protein 3 OS=Homo sapiens OX=9606 GN=KIFAP3	110501.0|104012.0|104810.0|98042.2	3	6.48668	-0.15115	24.6235	-1.30006	0.219195	0.999947	-4.522	CA	no_hit
PSME4	Q14997	Proteasome activator complex subunit 4 OS=Homo sapiens OX=9606 GN=PSME4 PE=1 SV=2	246695	23	7.48616	-0.156861	28.8012	-1.29951	0.219378	0.999947	-4.52224	CA	no_hit
POF1B	Q8WVV4|Q8WVV4-1	Protein POF1B OS=Homo sapiens OX=9606 GN=POF1B PE=1 SV=3|Isoform 1 of Protein POF1B OS=Homo sapiens OX=9606 GN=POF1B	79525.0|80155.3	18	7.48053	0.302272	29.5895	1.29941	0.21941	0.999947	-4.52228	CA	no_hit
NHSL1	Q5SYE7|Q5SYE7-2	NHS-like protein 1 OS=Homo sapiens OX=9606 GN=NHSL1 PE=1 SV=2|Isoform 2 of NHS-like protein 1 OS=Homo sapiens OX=9606 GN=NHSL1	192485.0|194366.0	4	6.30905	0.149569	24.0328	1.29937	0.219423	0.999947	-4.5223	CA	no_hit
CLIC1	O00299	Chloride intracellular channel protein 1 OS=Homo sapiens OX=9606 GN=CLIC1 PE=1 SV=4	32723.6	9	8.32819	-0.165695	29.0609	-1.29932	0.219441	0.999947	-4.52232	CA	no_hit
MAP2K3	P46734|P46734-2|P46734-3	Dual specificity mitogen-activated protein kinase kinase 3 OS=Homo sapiens OX=9606 GN=MAP2K3 PE=1 SV=2|Dual specificity mitogen-activated protein kinase kinase 3 OS=Homo sapiens OX=9606 GN=MAP2K3 PE=1 SV=2|Isoform 1 of Dual specificity mitogen-activated protein kinase kinase 3 OS=Homo sapiens OX=9606 GN=MAP2K3|Isoform 2 of Dual specificity mitogen-activated protein kinase kinase 3 OS=Homo sapiens…	47544.4|42822.8|47861.7	8	7.34506	-0.154608	27.7172	-1.29621	0.220474	0.999947	-4.52368	CA	no_hit
PINX1	Q96BK5	PIN2/TERF1-interacting telomerase inhibitor 1 OS=Homo sapiens OX=9606 GN=PINX1 PE=1 SV=2	52697.6	3	6.70554	0.288777	27.0682	1.29448	0.221049	0.999947	-4.52443	CA	no_hit
PSAT1	Q9Y617	Phosphoserine aminotransferase OS=Homo sapiens OX=9606 GN=PSAT1 PE=1 SV=2	49009.6	20	8.54566	-0.143181	30.8018	-1.29417	0.221154	0.999947	-4.52457	CA	no_hit
TTC27	Q6P3X3	Tetratricopeptide repeat protein 27 OS=Homo sapiens OX=9606 GN=TTC27 PE=1 SV=1	112789	13	7.26344	-0.175404	28.8288	-1.29265	0.221661	0.999947	-4.52523	CA	no_hit
DCUN1D1	Q96GG9	DCN1-like protein 1 OS=Homo sapiens OX=9606 GN=DCUN1D1 PE=1 SV=1	37938.3	6	7.47771	-0.148985	27.2581	-1.29255	0.221694	0.999947	-4.52527	CA	no_hit
BCAP29	C9JTE9|H7C5E2|Q9UHQ4|Q9UHQ4-2	B-cell receptor-associated protein 29 (Fragment) OS=Homo sapiens OX=9606 GN=BCAP29 PE=1 SV=1|B-cell receptor-associated protein 29 (Fragment) OS=Homo sapiens OX=9606 GN=BCAP29 PE=1 SV=1|B-cell receptor-associated protein 29 OS=Homo sapiens OX=9606 GN=BCAP29 PE=1 SV=2|Isoform 2 of B-cell receptor-associated protein 29 OS=Homo sapiens OX=9606 GN=BCAP29|B-cell receptor-associated protein 29 (Fragmen…	34655.6|43146.1|36629.8|53033.7	6	7.09604	-0.138415	27.5699	-1.29229	0.221782	0.999947	-4.52538	CA	no_hit
PRPS1	P60891	Ribose-phosphate pyrophosphokinase 1 OS=Homo sapiens OX=9606 GN=PRPS1 PE=1 SV=2	41409.3	9	8.20759	-0.1498	28.8104	-1.29202	0.221874	0.999947	-4.5255	CA	no_hit
CSE1L	P55060|P55060-3	Exportin-2 OS=Homo sapiens OX=9606 GN=CSE1L PE=1 SV=3|Isoform 3 of Exportin-2 OS=Homo sapiens OX=9606 GN=CSE1L	128789.0|126151.0	32	8.33873	-0.176158	31.1825	-1.29138	0.222086	0.999947	-4.52578	CA	no_hit
SPIN1	Q9Y657	Spindlin-1 OS=Homo sapiens OX=9606 GN=SPIN1 PE=1 SV=3	36084.2	5	6.63363	0.158305	26.6878	1.29071	0.222312	0.999947	-4.52607	CA	no_hit
M1	P03485	Matrix protein 1 OS=Influenza A virus (strain A/Puerto Rico/8/1934 H1N1) OX=211044 GN=M1 PE=1 SV=1	32001.1	15	9.8277	0.2523	34.0737	1.29053	0.222371	0.999947	-4.52615	CA	no_hit
PAK1	B3KNX7|E9PM17|Q13153|Q13153-2	Non-specific serine/threonine protein kinase OS=Homo sapiens OX=9606 GN=PAK1 PE=1 SV=1|Serine/threonine-protein kinase PAK 1 OS=Homo sapiens OX=9606 GN=PAK1 PE=1 SV=1|Serine/threonine-protein kinase PAK 1 OS=Homo sapiens OX=9606 GN=PAK1 PE=1 SV=2|Isoform 2 of Serine/threonine-protein kinase PAK 1 OS=Homo sapiens OX=9606 GN=PAK1	71532.4|61035.3|75191.6|75434.2	6	6.85872	-0.122781	26.4977	-1.28858	0.223027	0.999947	-4.527	CA	no_hit
GGA3	Q9NZ52|Q9NZ52-2	ADP-ribosylation factor-binding protein GGA3 OS=Homo sapiens OX=9606 GN=GGA3 PE=1 SV=1|Isoform Short of ADP-ribosylation factor-binding protein GGA3 OS=Homo sapiens OX=9606 GN=GGA3|ADP-ribosylation factor-binding protein GGA3 OS=Homo sapiens OX=9606 GN=GGA3 PE=1 SV=1	91803.6|86629.8	7	6.9749	0.145081	26.6389	1.28832	0.223114	0.999947	-4.52711	CA	no_hit
DIAPH1	A0A0G2JH68	Protein diaphanous homolog 1 OS=Homo sapiens OX=9606 GN=DIAPH1 PE=1 SV=1	173590	38	8.05171	-0.152109	30.885	-1.28817	0.223165	0.999947	-4.52718	CA	no_hit
EBNA1BP2	H7C2Q8|Q99848	EBNA1 binding protein 2, isoform CRA_d OS=Homo sapiens OX=9606 GN=EBNA1BP2 PE=1 SV=1|Probable rRNA-processing protein EBP2 OS=Homo sapiens OX=9606 GN=EBNA1BP2 PE=1 SV=2	55127.9|48272.5	14	7.74798	0.426218	30.2811	1.28717	0.223499	0.999947	-4.52761	CA	no_hit
KNOP1	Q1ED39	Lysine-rich nucleolar protein 1 OS=Homo sapiens OX=9606 GN=KNOP1 PE=1 SV=1	76064.9	10	7.27993	0.441167	28.7327	1.28681	0.22362	0.999947	-4.52776	CA	no_hit
TEAD1	H0YE88|P28347	Transcriptional enhancer factor TEF-1 OS=Homo sapiens OX=9606 GN=TEAD1 PE=1 SV=1|Transcriptional enhancer factor TEF-1 OS=Homo sapiens OX=9606 GN=TEAD1 PE=1 SV=2	56814.0|56831.9	5	6.98848	0.129022	27.9997	1.28642	0.223751	0.999947	-4.52793	CA	no_hit
ABL1	P00519|P00519-2	Tyrosine-protein kinase ABL1 OS=Homo sapiens OX=9606 GN=ABL1 PE=1 SV=4|Isoform IB of Tyrosine-protein kinase ABL1 OS=Homo sapiens OX=9606 GN=ABL1	148540.0|150507.0	2	6.28362	0.121778	24.2578	1.28555	0.224045	0.999947	-4.52831	CA	no_hit
PPFIBP1	Q86W92-2	Isoform 2 of Liprin-beta-1 OS=Homo sapiens OX=9606 GN=PPFIBP1	139538	16	7.40381	0.146409	28.7954	1.28508	0.224203	0.999947	-4.52851	CA	no_hit
KDM1A	O60341	Lysine-specific histone demethylase 1A OS=Homo sapiens OX=9606 GN=KDM1A PE=1 SV=2	108872	19	7.50085	0.117393	29.3075	1.28467	0.224344	0.999947	-4.5287	CA	no_hit
BPNT1	O95861	3'(2'),5'-bisphosphate nucleotidase 1 OS=Homo sapiens OX=9606 GN=BPNT1 PE=1 SV=1	39797.5	14	7.89525	-0.130493	29.0804	-1.28415	0.224518	0.999947	-4.52892	CA	no_hit
IFT27	Q9BW83|Q9BW83-2	Intraflagellar transport protein 27 homolog OS=Homo sapiens OX=9606 GN=IFT27 PE=1 SV=1|Isoform 2 of Intraflagellar transport protein 27 homolog OS=Homo sapiens OX=9606 GN=IFT27	24707.1|24650.1	7	7.44922	-0.13015	27.718	-1.2837	0.224671	0.999947	-4.52912	CA	no_hit
BAAT	Q14032	Bile acid-CoA:amino acid N-acyltransferase OS=Homo sapiens OX=9606 GN=BAAT PE=1 SV=1	51308.4	5	7.68388	-0.188385	27.1127	-1.28163	0.225372	0.999947	-4.53001	CA	no_hit
PSEN1	E7ES96|P49768|P49768-2	Presenilin OS=Homo sapiens OX=9606 GN=PSEN1 PE=1 SV=1|Presenilin-1 OS=Homo sapiens OX=9606 GN=PSEN1 PE=1 SV=1|Isoform 2 of Presenilin-1 OS=Homo sapiens OX=9606 GN=PSEN1	46542.0|57786.5|57316.3	2	6.71763	0.191322	25.0258	1.28079	0.225654	0.999947	-4.53037	CA	no_hit
NOL3	H3BM67|H3BUN4|H3BUP2|O60936|O60936-1|O60936-3	Nucleolar protein 3 (Fragment) OS=Homo sapiens OX=9606 GN=NOL3 PE=1 SV=8|Nucleolar protein 3 (Fragment) OS=Homo sapiens OX=9606 GN=NOL3 PE=1 SV=1|Nucleolar protein 3 (Fragment) OS=Homo sapiens OX=9606 GN=NOL3 PE=1 SV=1|Nucleolar protein 3 OS=Homo sapiens OX=9606 GN=NOL3 PE=1 SV=2|Isoform 1 of Nucleolar protein 3 OS=Homo sapiens OX=9606 GN=NOL3|Isoform 3 of Nucleolar protein 3 OS=Homo sapiens OX=9…	15751.9|23554.3|19867.8|23756.4|26727.1|31143.0	2	6.47999	0.315432	23.3414	1.28052	0.225746	0.999947	-4.53049	CA	no_hit
REXO4	Q9GZR2	RNA exonuclease 4 OS=Homo sapiens OX=9606 GN=REXO4 PE=1 SV=2	64514.9	8	7.06597	0.354816	28.2967	1.2791	0.226229	0.999947	-4.5311	CA	no_hit
ZNF579	Q8NAF0	Zinc finger protein 579 OS=Homo sapiens OX=9606 GN=ZNF579 PE=1 SV=2	66593.1	7	7.19015	0.239183	27.4432	1.2785	0.226435	0.999947	-4.53137	CA	no_hit
EIF4ENIF1	B1AKL4|Q9NRA8|Q9NRA8-3	Eukaryotic translation initiation factor 4E transporter OS=Homo sapiens OX=9606 GN=EIF4ENIF1 PE=1 SV=1|Eukaryotic translation initiation factor 4E transporter OS=Homo sapiens OX=9606 GN=EIF4ENIF1 PE=1 SV=2|Isoform 3 of Eukaryotic translation initiation factor 4E transporter OS=Homo sapiens OX=9606 GN=EIF4ENIF1	121950.0|124904.0|125032.0	5	6.79439	0.153541	26.6416	1.27826	0.226517	0.999947	-4.53147	CA	no_hit
PTGR2	Q8N8N7	Prostaglandin reductase 2 OS=Homo sapiens OX=9606 GN=PTGR2 PE=1 SV=1	44710.4	6	7.5045	-0.112494	27.8282	-1.27789	0.226642	0.999947	-4.53163	CA	no_hit
PMVK	Q15126	Phosphomevalonate kinase OS=Homo sapiens OX=9606 GN=PMVK PE=1 SV=3	24585.9	11	7.71066	-0.153917	29.0293	-1.27756	0.226753	0.999947	-4.53177	CA	no_hit
EPS8L2	Q9H6S3|Q9H6S3-3	Epidermal growth factor receptor kinase substrate 8-like protein 2 OS=Homo sapiens OX=9606 GN=EPS8L2 PE=1 SV=2|Isoform 3 of Epidermal growth factor receptor kinase substrate 8-like protein 2 OS=Homo sapiens OX=9606 GN=EPS8L2	95495.1|97195.9	26	7.96983	0.219687	30.1833	1.27743	0.226796	0.999947	-4.53182	CA	no_hit
RAB35	Q15286	Ras-related protein Rab-35 OS=Homo sapiens OX=9606 GN=RAB35 PE=1 SV=1	28771.6	8	8.20125	-0.139013	29.2312	-1.27734	0.226829	0.999947	-4.53187	CA	no_hit
ARMT1	Q9H993	Damage-control phosphatase ARMT1 OS=Homo sapiens OX=9606 GN=ARMT1 PE=1 SV=1	60969.4	10	7.70126	-0.166711	28.5425	-1.27723	0.226865	0.999947	-4.53191	CA	no_hit
RAI14	Q9P0K7-4|Q9P0K7|Q9P0K7-2|Q9P0K7-3	Isoform 4 of Ankycorbin OS=Homo sapiens OX=9606 GN=RAI14|Ankycorbin OS=Homo sapiens OX=9606 GN=RAI14 PE=1 SV=2|Isoform 2 of Ankycorbin OS=Homo sapiens OX=9606 GN=RAI14|Isoform 3 of Ankycorbin OS=Homo sapiens OX=9606 GN=RAI14|Isoform 4 of Ankycorbin OS=Homo sapiens OX=9606 GN=RAI14	139103.0|143455.0|143532.0|141582.0	36	7.89802	0.287653	31.0442	1.27707	0.22692	0.999947	-4.53198	CA	no_hit
WDR70	Q9NW82	WD repeat-containing protein 70 OS=Homo sapiens OX=9606 GN=WDR70 PE=1 SV=1	89410.9	9	7.14869	0.112749	28.1091	1.27695	0.226963	0.999947	-4.53204	CA	no_hit
C18orf21	Q32NC0|Q32NC0-2	UPF0711 protein C18orf21 OS=Homo sapiens OX=9606 GN=C18orf21 PE=1 SV=1|Isoform 2 of UPF0711 protein C18orf21 OS=Homo sapiens OX=9606 GN=C18orf21	33975.2|21077.1	3	6.60155	0.297247	26.4338	1.27683	0.227001	0.999947	-4.53208	CA	no_hit
EEF2	P13639	Elongation factor 2 OS=Homo sapiens OX=9606 GN=EEF2 PE=1 SV=4	116020	53	9.2394	-0.158387	33.0171	-1.27671	0.227043	0.999947	-4.53214	CA	no_hit
IGFBP4	P22692	Insulin-like growth factor-binding protein 4 OS=Homo sapiens OX=9606 GN=IGFBP4 PE=1 SV=2	32763.4	4	6.896	0.322236	24.0619	1.27658	0.227086	0.999947	-4.53219	CA	no_hit
UBE2H	P62256	Ubiquitin-conjugating enzyme E2 H OS=Homo sapiens OX=9606 GN=UBE2H PE=1 SV=1	24653.8	5	7.55662	-0.203638	28.4528	-1.27593	0.22731	0.999947	-4.53247	CA	no_hit
KIAA1217	Q5T5P2|Q5T5P2-3	Sickle tail protein homolog OS=Homo sapiens OX=9606 GN=KIAA1217 PE=1 SV=2|Isoform 3 of Sickle tail protein homolog OS=Homo sapiens OX=9606 GN=KIAA1217	254461.0|193136.0	8	6.66466	0.187141	26.6086	1.27444	0.227818	0.999947	-4.53312	CA	no_hit
XPO1	O14980	Exportin-1 OS=Homo sapiens OX=9606 GN=XPO1 PE=1 SV=1	143307	33	8.41297	-0.154978	31.3563	-1.2743	0.227865	0.999947	-4.53318	CA	no_hit
MBD3	K7EIE8|O95983|O95983-2	Methyl-CpG binding domain protein 3, isoform CRA_b OS=Homo sapiens OX=9606 GN=MBD3 PE=1 SV=1|Methyl-CpG-binding domain protein 3 OS=Homo sapiens OX=9606 GN=MBD3 PE=1 SV=1|Isoform 2 of Methyl-CpG-binding domain protein 3 OS=Homo sapiens OX=9606 GN=MBD3|Methyl-CpG-binding domain protein 3 OS=Homo sapiens OX=9606 GN=MBD3 PE=1 SV=1|Isoform 2 of Methyl-CpG-binding domain protein 3 OS=Homo sapiens OX=9…	32257.0|40048.2|36163.3	4	6.91909	0.252239	26.7134	1.2738	0.228038	0.999947	-4.53339	CA	no_hit
USP8	P40818	Ubiquitin carboxyl-terminal hydrolase 8 OS=Homo sapiens OX=9606 GN=USP8 PE=1 SV=1	164006	16	7.60091	-0.138172	29.5642	-1.27313	0.228267	0.999947	-4.53368	CA	no_hit
GDI1	P31150	Rab GDP dissociation inhibitor alpha OS=Homo sapiens OX=9606 GN=GDI1 PE=1 SV=2	59999.4	9	7.87439	-0.159516	29.2259	-1.27311	0.228272	0.999947	-4.53369	CA	no_hit
CUL1	Q13616|A0A590UJ21	Cullin-1 OS=Homo sapiens OX=9606 GN=CUL1 PE=1 SV=2|Cullin-1 OS=Homo sapiens OX=9606 GN=CUL1 PE=1 SV=1|Cullin-1 OS=Homo sapiens OX=9606 GN=CUL1 PE=1 SV=2	110992.0|104682.0	30	7.85784	-0.155177	30.7575	-1.2731	0.228276	0.999947	-4.5337	CA	no_hit
KHSRP	A0A087WTP3|Q92945	Far upstream element-binding protein 2 OS=Homo sapiens OX=9606 GN=KHSRP PE=1 SV=1|Far upstream element-binding protein 2 OS=Homo sapiens OX=9606 GN=KHSRP PE=1 SV=4	82868.9|82785.5	26	8.26117	0.148347	30.7199	1.27238	0.228523	0.999947	-4.53401	CA	no_hit
FASN	P49327	Fatty acid synthase OS=Homo sapiens OX=9606 GN=FASN PE=1 SV=3	301735	97	8.72785	-0.163187	33.0076	-1.27186	0.228702	0.999947	-4.53423	CA	no_hit
SF3A2	Q15428	Splicing factor 3A subunit 2 OS=Homo sapiens OX=9606 GN=SF3A2 PE=1 SV=2	56030.9	9	7.80331	0.177365	28.6414	1.27151	0.228823	0.999947	-4.53438	CA	no_hit
POLB	P06746	DNA polymerase beta OS=Homo sapiens OX=9606 GN=POLB PE=1 SV=3	49276.3	5	6.84644	0.147032	26.7944	1.27078	0.229073	0.999947	-4.5347	CA	no_hit
FKBP1A	P62942	Peptidyl-prolyl cis-trans isomerase FKBP1A OS=Homo sapiens OX=9606 GN=FKBP1A PE=1 SV=2	14433.8	3	7.59959	-0.139425	28.0698	-1.27066	0.229114	0.999947	-4.53475	CA	no_hit
CSGALNACT1	Q8TDX6	Chondroitin sulfate N-acetylgalactosaminyltransferase 1 OS=Homo sapiens OX=9606 GN=CSGALNACT1 PE=1 SV=2	73632.6	7	6.98029	0.203289	27.1819	1.27052	0.229162	0.999947	-4.53481	CA	no_hit
CLNS1A	E9PMI6|J3KN38|P54105	Methylosome subunit pICln OS=Homo sapiens OX=9606 GN=CLNS1A PE=1 SV=1|Methylosome subunit pICln OS=Homo sapiens OX=9606 GN=CLNS1A PE=1 SV=1|Methylosome subunit pICln OS=Homo sapiens OX=9606 GN=CLNS1A PE=1 SV=1	19217.3|23417.9|27891.0	5	7.46237	-0.149049	27.5947	-1.2701	0.229304	0.999947	-4.53499	CA	no_hit
GCC1	Q96CN9	GRIP and coiled-coil domain-containing protein 1 OS=Homo sapiens OX=9606 GN=GCC1 PE=1 SV=1	106542	11	6.87533	0.193499	26.985	1.27004	0.229326	0.999947	-4.53501	CA	no_hit
MRPL9	Q9BYD2	39S ribosomal protein L9, mitochondrial OS=Homo sapiens OX=9606 GN=MRPL9 PE=1 SV=2	37696.4	9	7.66207	0.109852	28.7104	1.2696	0.229477	0.999947	-4.5352	CA	no_hit
HAX1	O00165|O00165-2|O00165-3|O00165-5	HCLS1-associated protein X-1 OS=Homo sapiens OX=9606 GN=HAX1 PE=1 SV=2|Isoform 2 of HCLS1-associated protein X-1 OS=Homo sapiens OX=9606 GN=HAX1|Isoform 3 of HCLS1-associated protein X-1 OS=Homo sapiens OX=9606 GN=HAX1|Isoform 5 of HCLS1-associated protein X-1 OS=Homo sapiens OX=9606 GN=HAX1|HCLS1-associated protein X-1 OS=Homo sapiens OX=9606 GN=HAX1 PE=1 SV=2|Isoform 2 of HCLS1-associated prote…	33122.1|33976.5|30149.7|27604.8	5	6.90985	0.167116	25.9512	1.26941	0.229543	0.999947	-4.53528	CA	no_hit
SPECC1L	A0A494C1J1|Q69YQ0|Q69YQ0-2	Cytospin-A OS=Homo sapiens OX=9606 GN=SPECC1L PE=1 SV=1|Cytospin-A OS=Homo sapiens OX=9606 GN=SPECC1L PE=1 SV=2|Isoform 2 of Cytospin-A OS=Homo sapiens OX=9606 GN=SPECC1L	150175.0|149261.0|144483.0	16	7.04139	0.223303	28.2347	1.26655	0.230528	0.999947	-4.53652	CA	no_hit
DNAJB14	Q8TBM8	DnaJ homolog subfamily B member 14 OS=Homo sapiens OX=9606 GN=DNAJB14 PE=1 SV=1	53288.3	8	7.07061	0.150716	28.0393	1.26546	0.230906	0.999947	-4.53699	CA	no_hit
RIOX1	Q9H6W3	Ribosomal oxygenase 1 OS=Homo sapiens OX=9606 GN=RIOX1 PE=1 SV=2	74729.8	9	7.38433	0.215857	28.4179	1.26428	0.231312	0.999947	-4.53749	CA	no_hit
PPP2R1B	P30154|P30154-2|P30154-4	Serine/threonine-protein phosphatase 2A 65 kDa regulatory subunit A beta isoform OS=Homo sapiens OX=9606 GN=PPP2R1B PE=1 SV=3|Isoform 2 of Serine/threonine-protein phosphatase 2A 65 kDa regulatory subunit A beta isoform OS=Homo sapiens OX=9606 GN=PPP2R1B|Isoform 4 of Serine/threonine-protein phosphatase 2A 65 kDa regulatory subunit A beta isoform OS=Homo sapiens OX=9606 GN=PPP2R1B|Serine/threonin…	75924.9|84508.5|70115.7	4	6.69637	-0.161732	26.4451	-1.26412	0.231366	0.999947	-4.53756	CA	no_hit
GCFC2	P16383|P16383-2	GC-rich sequence DNA-binding factor 2 OS=Homo sapiens OX=9606 GN=GCFC2 PE=1 SV=2|Isoform 2 of GC-rich sequence DNA-binding factor 2 OS=Homo sapiens OX=9606 GN=GCFC2	108760.0|103617.0	5	6.54579	-0.181116	25.0896	-1.26406	0.23139	0.999947	-4.53759	CA	no_hit
PFKP	Q01813	ATP-dependent 6-phosphofructokinase, platelet type OS=Homo sapiens OX=9606 GN=PFKP PE=1 SV=2	99230.6	25	8.8387	-0.148269	31.5848	-1.26241	0.231961	0.999947	-4.53829	CA	no_hit
ERICH5	Q6P6B1	Glutamate-rich protein 5 OS=Homo sapiens OX=9606 GN=ERICH5 PE=2 SV=1	47326.5	3	6.56313	0.152727	24.442	1.26075	0.232537	0.999947	-4.53901	CA	no_hit
ISYNA1	Q9NPH2|Q9NPH2-2|Q9NPH2-3	Inositol-3-phosphate synthase 1 OS=Homo sapiens OX=9606 GN=ISYNA1 PE=1 SV=1|Isoform 2 of Inositol-3-phosphate synthase 1 OS=Homo sapiens OX=9606 GN=ISYNA1|Isoform 3 of Inositol-3-phosphate synthase 1 OS=Homo sapiens OX=9606 GN=ISYNA1	66713.8|52192.3|60481.4	5	6.70212	-0.148844	26.4532	-1.26026	0.232708	0.999947	-4.53922	CA	no_hit
CIC	I3L2J0|Q96RK0	Protein capicua homolog OS=Homo sapiens OX=9606 GN=CIC PE=1 SV=1|Protein capicua homolog OS=Homo sapiens OX=9606 GN=CIC PE=1 SV=2|Protein capicua homolog OS=Homo sapiens OX=9606 GN=CIC PE=1 SV=1	289931.0|184367.0	8	6.46582	0.151806	26.2171	1.25948	0.232979	0.999947	-4.53955	CA	no_hit
ANKMY2	Q8IV38	Ankyrin repeat and MYND domain-containing protein 2 OS=Homo sapiens OX=9606 GN=ANKMY2 PE=1 SV=1	62765.6	4	6.90749	-0.148101	26.6491	-1.25865	0.233269	0.999947	-4.53991	CA	no_hit
THOP1	P52888	Thimet oligopeptidase OS=Homo sapiens OX=9606 GN=THOP1 PE=1 SV=2	91261.7	27	8.07795	-0.136577	30.483	-1.25828	0.233398	0.999947	-4.54006	CA	no_hit
PSPC1	Q8WXF1	Paraspeckle component 1 OS=Homo sapiens OX=9606 GN=PSPC1 PE=1 SV=1	66121.2	17	7.88834	0.303602	30.37	1.25718	0.233781	0.999947	-4.54053	CA	no_hit
FADD	Q13158	FAS-associated death domain protein OS=Homo sapiens OX=9606 GN=FADD PE=1 SV=1	25926.6	6	7.44494	-0.144905	27.0982	-1.25716	0.233788	0.999947	-4.54054	CA	no_hit
ZNF706	Q9Y5V0	Zinc finger protein 706 OS=Homo sapiens OX=9606 GN=ZNF706 PE=1 SV=1	12561.2	5	7.4075	0.362803	27.7647	1.25607	0.234169	0.999947	-4.54101	CA	no_hit
RRS1	Q15050	Ribosome biogenesis regulatory protein homolog OS=Homo sapiens OX=9606 GN=RRS1 PE=1 SV=2	53393.5	10	7.71551	0.484452	29.792	1.25475	0.23463	0.999947	-4.54157	CA	no_hit
ENPP1	P22413	Ectonucleotide pyrophosphatase/phosphodiesterase family member 1 OS=Homo sapiens OX=9606 GN=ENPP1 PE=1 SV=2	124668	3	6.40069	0.161508	25.3641	1.25425	0.234803	0.999947	-4.54178	CA	no_hit
RABEP1	Q15276	Rab GTPase-binding effector protein 1 OS=Homo sapiens OX=9606 GN=RABEP1 PE=1 SV=2	121227	22	7.17159	0.250248	29.3191	1.25381	0.234959	0.999947	-4.54198	CA	no_hit
GGPS1	O95749	Geranylgeranyl pyrophosphate synthase OS=Homo sapiens OX=9606 GN=GGPS1 PE=1 SV=1	42321	5	7.48292	-0.156211	27.5765	-1.25128	0.235847	0.999947	-4.54306	CA	no_hit
HPGD	P15428	15-hydroxyprostaglandin dehydrogenase [NAD(+)] OS=Homo sapiens OX=9606 GN=HPGD PE=1 SV=1	34358.5	8	7.41221	-0.140927	27.7261	-1.25113	0.235899	0.999947	-4.54312	CA	no_hit
HMGA1	P17096	High mobility group protein HMG-I/HMG-Y OS=Homo sapiens OX=9606 GN=HMGA1 PE=1 SV=3	16536.5	5	8.22378	0.307406	28.6963	1.251	0.235944	0.999947	-4.54317	CA	no_hit
ABR	B7Z683|Q12979-2	Active breakpoint cluster region-related protein OS=Homo sapiens OX=9606 GN=ABR PE=1 SV=1|Isoform Short of Active breakpoint cluster region-related protein OS=Homo sapiens OX=9606 GN=ABR	90828.9|116482.0	21	7.56848	-0.151575	29.7174	-1.25016	0.236241	0.999947	-4.54353	CA	no_hit
PPIL2	Q13356|Q13356-2	RING-type E3 ubiquitin-protein ligase PPIL2 OS=Homo sapiens OX=9606 GN=PPIL2 PE=1 SV=1|Isoform 2 of RING-type E3 ubiquitin-protein ligase PPIL2 OS=Homo sapiens OX=9606 GN=PPIL2	74148.9|73927.7	5	6.89333	0.236863	26.7053	1.25006	0.236276	0.999947	-4.54358	CA	no_hit
RNF14	Q9UBS8	E3 ubiquitin-protein ligase RNF14 OS=Homo sapiens OX=9606 GN=RNF14 PE=1 SV=1	63535.7	11	7.1956	-0.13407	27.9551	-1.24968	0.23641	0.999947	-4.54374	CA	no_hit
CUX1	P39880-3|Q13948|P39880-9	Isoform 3 of Homeobox protein cut-like 1 OS=Homo sapiens OX=9606 GN=CUX1|Protein CASP OS=Homo sapiens OX=9606 GN=CUX1 PE=1 SV=2|Isoform 3 of Homeobox protein cut-like 1 OS=Homo sapiens OX=9606 GN=CUX1|Isoform 11 of Homeobox protein cut-like 1 OS=Homo sapiens OX=9606 GN=CUX1|Protein CASP OS=Homo sapiens OX=9606 GN=CUX1 PE=1 SV=2	196711.0|93454.8|86810.2	31	7.46727	0.115186	29.7692	1.24889	0.23669	0.999947	-4.54408	CA	no_hit
NONO	Q15233	Non-POU domain-containing octamer-binding protein OS=Homo sapiens OX=9606 GN=NONO PE=1 SV=4	62524.9	20	8.82812	0.329806	32.0373	1.24819	0.236936	0.999947	-4.54437	CA	no_hit
MYH9	P35579|P35579-2	Myosin-9 OS=Homo sapiens OX=9606 GN=MYH9 PE=1 SV=4|Myosin-9 OS=Homo sapiens OX=9606 GN=MYH9 PE=1 SV=4|Isoform 2 of Myosin-9 OS=Homo sapiens OX=9606 GN=MYH9	290617.0|201554.0	102	9.08635	-0.154571	33.9079	-1.24808	0.236973	0.999947	-4.54442	CA	no_hit
ADSL	A0A0A6YY92|A0A1B0GTJ7|A0A1B0GWJ0|P30566	Adenylosuccinate lyase OS=Homo sapiens OX=9606 GN=ADSL PE=1 SV=1|Adenylosuccinate lyase OS=Homo sapiens OX=9606 GN=ADSL PE=1 SV=1|Adenylosuccinate lyase OS=Homo sapiens OX=9606 GN=ADSL PE=1 SV=1|Adenylosuccinate lyase OS=Homo sapiens OX=9606 GN=ADSL PE=1 SV=2|Adenylosuccinate lyase OS=Homo sapiens OX=9606 GN=ADSL PE=1 SV=1|Adenylosuccinate lyase OS=Homo sapiens OX=9606 GN=ADSL PE=1 SV=2	64888.2|62745.1|62720.1|63504.6	13	7.98137	-0.145674	29.7281	-1.24777	0.237085	0.999947	-4.54455	CA	no_hit
CREBBP	Q92793|Q92793-2	CREB-binding protein OS=Homo sapiens OX=9606 GN=CREBBP PE=1 SV=3|CREB-binding protein OS=Homo sapiens OX=9606 GN=CREBBP PE=1 SV=3|Isoform 2 of CREB-binding protein OS=Homo sapiens OX=9606 GN=CREBBP	303321.0|297825.0	6	6.38911	0.205624	25.634	1.24741	0.237209	0.999947	-4.5447	CA	no_hit
MMS19	Q96T76|Q96T76-8	MMS19 nucleotide excision repair protein homolog OS=Homo sapiens OX=9606 GN=MMS19 PE=1 SV=2|Isoform 5 of MMS19 nucleotide excision repair protein homolog OS=Homo sapiens OX=9606 GN=MMS19	126183.0|128598.0	17	7.68048	-0.136981	28.7652	-1.24698	0.237362	0.999947	-4.54489	CA	no_hit
SDC4	P31431|P31431-2	Syndecan-4 OS=Homo sapiens OX=9606 GN=SDC4 PE=1 SV=2|Isoform 2 of Syndecan-4 OS=Homo sapiens OX=9606 GN=SDC4|Syndecan-4 OS=Homo sapiens OX=9606 GN=SDC4 PE=1 SV=2	24974.3|17808.9	3	6.55157	0.188305	25.349	1.24695	0.237373	0.999947	-4.5449	CA	no_hit
DCP1B	F5GZK9|Q8IZD4|Q8IZD4-2	mRNA-decapping enzyme 1B OS=Homo sapiens OX=9606 GN=DCP1B PE=1 SV=1|mRNA-decapping enzyme 1B OS=Homo sapiens OX=9606 GN=DCP1B PE=1 SV=2|Isoform 2 of mRNA-decapping enzyme 1B OS=Homo sapiens OX=9606 GN=DCP1B	50131.9|78118.8|65763.3	4	6.68194	0.161341	26.6886	1.2462	0.237639	0.999947	-4.54522	CA	no_hit
SND1	Q7KZF4	Staphylococcal nuclease domain-containing protein 1 OS=Homo sapiens OX=9606 GN=SND1 PE=1 SV=1	120262	46	8.56511	-0.158315	32.1402	-1.24606	0.237688	0.999947	-4.54528	CA	no_hit
MTO1	Q9Y2Z2|Q9Y2Z2-2|Q9Y2Z2-3|Q9Y2Z2-4|Q9Y2Z2-6|Q9Y2Z2-5	Protein MTO1 homolog, mitochondrial OS=Homo sapiens OX=9606 GN=MTO1 PE=1 SV=2|Isoform 1 of Protein MTO1 homolog, mitochondrial OS=Homo sapiens OX=9606 GN=MTO1|Isoform 2 of Protein MTO1 homolog, mitochondrial OS=Homo sapiens OX=9606 GN=MTO1|Isoform 5 of Protein MTO1 homolog, mitochondrial OS=Homo sapiens OX=9606 GN=MTO1|Isoform 7 of Protein MTO1 homolog, mitochondrial OS=Homo sapiens OX=9606 GN=MT…	91967.6|77275.5|39236.1|89249.1|93654.2|83637.3	4	6.53773	0.199459	25.7801	1.24593	0.237732	0.999947	-4.54533	CA	no_hit
TSPO	P30536	Translocator protein OS=Homo sapiens OX=9606 GN=TSPO PE=1 SV=3	19842.3	3	7.95381	0.138193	27.5114	1.24549	0.237889	0.999947	-4.54552	CA	no_hit
PFN2	G5E9Q6|P35080|P35080-2	Profilin OS=Homo sapiens OX=9606 GN=PFN2 PE=1 SV=1|Profilin-2 OS=Homo sapiens OX=9606 GN=PFN2 PE=1 SV=3|Isoform IIb of Profilin-2 OS=Homo sapiens OX=9606 GN=PFN2	24081.2|18116.3|17854.2	7	7.97926	-0.170079	28.959	-1.24526	0.237971	0.999947	-4.54562	CA	no_hit
ACO2	A2A274|Q99798	Aconitate hydratase, mitochondrial OS=Homo sapiens OX=9606 GN=ACO2 PE=1 SV=1|Aconitate hydratase, mitochondrial OS=Homo sapiens OX=9606 GN=ACO2 PE=1 SV=2	105295.0|102845.0	30	8.22141	0.132521	30.7692	1.24355	0.238575	0.999947	-4.54635	CA	no_hit
STRAP	Q9Y3F4|Q9Y3F4-2	Serine-threonine kinase receptor-associated protein OS=Homo sapiens OX=9606 GN=STRAP PE=1 SV=1|Isoform 2 of Serine-threonine kinase receptor-associated protein OS=Homo sapiens OX=9606 GN=STRAP	46665.5|48004.2	18	8.41334	-0.115894	30.457	-1.24339	0.238635	0.999947	-4.54642	CA	no_hit
AKAP8	O43823	A-kinase anchor protein 8 OS=Homo sapiens OX=9606 GN=AKAP8 PE=1 SV=1	88191.2	10	7.39978	0.254604	28.5835	1.24189	0.239166	0.999947	-4.54705	CA	no_hit
PLCB3	Q01970|Q01970-2	1-phosphatidylinositol 4,5-bisphosphate phosphodiesterase beta-3 OS=Homo sapiens OX=9606 GN=PLCB3 PE=1 SV=2|Isoform 2 of 1-phosphatidylinositol 4,5-bisphosphate phosphodiesterase beta-3 OS=Homo sapiens OX=9606 GN=PLCB3|1-phosphatidylinositol 4,5-bisphosphate phosphodiesterase beta-3 OS=Homo sapiens OX=9606 GN=PLCB3 PE=1 SV=2	160501.0|152304.0	17	7.19652	-0.12451	28.5981	-1.24173	0.239222	0.999947	-4.54712	CA	no_hit
CCDC93	F8W9X7|Q567U6	Coiled-coil domain-containing protein 93 OS=Homo sapiens OX=9606 GN=CCDC93 PE=1 SV=1|Coiled-coil domain-containing protein 93 OS=Homo sapiens OX=9606 GN=CCDC93 PE=1 SV=2	92750.2|92906.3	19	7.42201	-0.135413	29.0726	-1.24157	0.239278	0.999947	-4.54719	CA	no_hit
ELP2	Q6IA86|Q6IA86-2|Q6IA86-3|Q6IA86-4|Q6IA86-5|Q6IA86-6	Elongator complex protein 2 OS=Homo sapiens OX=9606 GN=ELP2 PE=1 SV=2|Isoform 2 of Elongator complex protein 2 OS=Homo sapiens OX=9606 GN=ELP2|Isoform 3 of Elongator complex protein 2 OS=Homo sapiens OX=9606 GN=ELP2|Isoform 4 of Elongator complex protein 2 OS=Homo sapiens OX=9606 GN=ELP2|Isoform 5 of Elongator complex protein 2 OS=Homo sapiens OX=9606 GN=ELP2|Isoform 6 of Elongator complex protei…	106434.0|98351.9|103536.0|88184.7|107584.0|115666.0	11	7.38004	-0.112363	28.4027	-1.24111	0.239445	0.999947	-4.54739	CA	no_hit
IRS1	P35568	Insulin receptor substrate 1 OS=Homo sapiens OX=9606 GN=IRS1 PE=1 SV=1	145179	3	6.45012	0.148441	25.8219	1.24006	0.239817	0.999947	-4.54783	CA	no_hit
AFAP1	Q8N556|Q8N556-2	Actin filament-associated protein 1 OS=Homo sapiens OX=9606 GN=AFAP1 PE=1 SV=2|Isoform 2 of Actin filament-associated protein 1 OS=Homo sapiens OX=9606 GN=AFAP1	105258.0|115292.0	5	6.6748	0.188431	26.3727	1.23892	0.240224	0.999947	-4.54831	CA	no_hit
MED8	Q96G25-2|Q96G25	Isoform 2 of Mediator of RNA polymerase II transcription subunit 8 OS=Homo sapiens OX=9606 GN=MED8|Mediator of RNA polymerase II transcription subunit 8 OS=Homo sapiens OX=9606 GN=MED8 PE=1 SV=2|Isoform 2 of Mediator of RNA polymerase II transcription subunit 8 OS=Homo sapiens OX=9606 GN=MED8	39661.7|34347.4	2	6.51092	0.210693	25.7334	1.23784	0.24061	0.999947	-4.54877	CA	no_hit
DAG1	Q14118	Dystroglycan OS=Homo sapiens OX=9606 GN=DAG1 PE=1 SV=2	112021	10	7.30103	-0.121025	27.5428	-1.23663	0.241042	0.999947	-4.54928	CA	no_hit
MELTF	P08582	Melanotransferrin OS=Homo sapiens OX=9606 GN=MELTF PE=1 SV=2	89365.1	4	6.40019	-0.152359	24.1095	-1.23594	0.241287	0.999947	-4.54957	CA	no_hit
RFK	Q969G6	Riboflavin kinase OS=Homo sapiens OX=9606 GN=RFK PE=1 SV=2	21623.7	5	7.41982	-0.203741	26.4587	-1.2359	0.241302	0.999947	-4.54959	CA	no_hit
HMGCS1	Q01581	Hydroxymethylglutaryl-CoA synthase, cytoplasmic OS=Homo sapiens OX=9606 GN=HMGCS1 PE=1 SV=2	66649.6	18	8.0747	-0.141777	30.4872	-1.23393	0.242008	0.999947	-4.55043	CA	no_hit
ANKZF1	B8ZZS4|Q9H8Y5	Ankyrin repeat and zinc finger domain-containing protein 1 OS=Homo sapiens OX=9606 GN=ANKZF1 PE=1 SV=1|Ankyrin repeat and zinc finger domain-containing protein 1 OS=Homo sapiens OX=9606 GN=ANKZF1 PE=1 SV=1	65542.1|91600.3	6	6.95732	0.25055	26.7379	1.23386	0.242033	0.999947	-4.55046	CA	no_hit
GLTP	F5H0U5|Q9NZD2	Glycolipid transfer protein OS=Homo sapiens OX=9606 GN=GLTP PE=1 SV=1|Glycolipid transfer protein OS=Homo sapiens OX=9606 GN=GLTP PE=1 SV=3	26683.7|29481.2	9	7.36309	-0.140731	28.1227	-1.23335	0.242217	0.999947	-4.55067	CA	no_hit
NPEPL1	Q8NDH3|Q8NDH3-4|Q8NDH3-5|Q8NDH3-2	Probable aminopeptidase NPEPL1 OS=Homo sapiens OX=9606 GN=NPEPL1 PE=1 SV=3|Isoform 4 of Probable aminopeptidase NPEPL1 OS=Homo sapiens OX=9606 GN=NPEPL1|Isoform 5 of Probable aminopeptidase NPEPL1 OS=Homo sapiens OX=9606 GN=NPEPL1|Probable aminopeptidase NPEPL1 OS=Homo sapiens OX=9606 GN=NPEPL1 PE=1 SV=3|Isoform 2 of Probable aminopeptidase NPEPL1 OS=Homo sapiens OX=9606 GN=NPEPL1|Isoform 4 of Pr…	62821.9|59691.1|57190.9|49592.4	6	7.32381	-0.156777	27.1461	-1.23279	0.242419	0.999947	-4.55091	CA	no_hit
HGD	Q93099	Homogentisate 1,2-dioxygenase OS=Homo sapiens OX=9606 GN=HGD PE=1 SV=2	58221	14	7.91384	-0.128614	29.3932	-1.23202	0.242696	0.999947	-4.55124	CA	no_hit
GART	P22102|C9JZG2	Trifunctional purine biosynthetic protein adenosine-3 OS=Homo sapiens OX=9606 GN=GART PE=1 SV=1|Trifunctional purine biosynthetic protein adenosine-3 (Fragment) OS=Homo sapiens OX=9606 GN=GART PE=1 SV=1|Trifunctional purine biosynthetic protein adenosine-3 OS=Homo sapiens OX=9606 GN=GART PE=1 SV=1	129944.0|17721.6	40	8.27411	-0.127319	31.2357	-1.23201	0.242699	0.999947	-4.55124	CA	no_hit
ITPK1	Q13572	Inositol-tetrakisphosphate 1-kinase OS=Homo sapiens OX=9606 GN=ITPK1 PE=1 SV=2	52246.5	7	6.96477	-0.114989	27.0737	-1.232	0.242703	0.999947	-4.55125	CA	no_hit
CCT2	P78371	T-complex protein 1 subunit beta OS=Homo sapiens OX=9606 GN=CCT2 PE=1 SV=4	69049.9	31	8.98122	-0.157737	32.2464	-1.23131	0.242951	0.999947	-4.55154	CA	no_hit
MGA	Q8IWI9|Q8IWI9-3	MAX gene-associated protein OS=Homo sapiens OX=9606 GN=MGA PE=1 SV=4|Isoform 2 of MAX gene-associated protein OS=Homo sapiens OX=9606 GN=MGA	412041.0|389230.0	6	6.22495	0.190208	25.5219	1.23127	0.242964	0.999947	-4.55155	CA	no_hit
AP4S1	A0A5F9ZH42|A0A5F9ZHV3|A0A5F9ZI62|G3V3X7|G3V4P7|G3V5J6|Q9Y587|Q9Y587-2|Q9Y587-3|Q9Y587-4	AP-4 complex subunit sigma-1 OS=Homo sapiens OX=9606 GN=AP4S1 PE=1 SV=1|AP complex subunit sigma OS=Homo sapiens OX=9606 GN=AP4S1 PE=1 SV=1|AP-4 complex subunit sigma-1 OS=Homo sapiens OX=9606 GN=AP4S1 PE=1 SV=1|AP complex subunit sigma (Fragment) OS=Homo sapiens OX=9606 GN=AP4S1 PE=1 SV=1|AP complex subunit sigma (Fragment) OS=Homo sapiens OX=9606 GN=AP4S1 PE=1 SV=1|AP complex subunit sigma OS=H…	18937.7|16112.5|18208.4|18371.8|14031.5|14457.7|19902.6|21518.0|18692.8|20034.3	2	7.16298	-0.130737	26.9779	-1.23001	0.24342	0.999947	-4.55209	CA	no_hit
CDK2	G3V5T9|P24941	Cyclin-dependent kinase 2 OS=Homo sapiens OX=9606 GN=CDK2 PE=1 SV=1|Cyclin-dependent kinase 2 OS=Homo sapiens OX=9606 GN=CDK2 PE=1 SV=2	45941.0|40467.4	5	7.43278	-0.137539	27.6616	-1.22982	0.243487	0.999947	-4.55216	CA	no_hit
WNK1	F5GWT4|Q9H4A3|Q9H4A3-2|Q9H4A3-5|Q9H4A3-6|Q9H4A3-7	Serine/threonine-protein kinase WNK1 OS=Homo sapiens OX=9606 GN=WNK1 PE=1 SV=1|Serine/threonine-protein kinase WNK1 OS=Homo sapiens OX=9606 GN=WNK1 PE=1 SV=2|Isoform 2 of Serine/threonine-protein kinase WNK1 OS=Homo sapiens OX=9606 GN=WNK1|Isoform 4 of Serine/threonine-protein kinase WNK1 OS=Homo sapiens OX=9606 GN=WNK1|Isoform 5 of Serine/threonine-protein kinase WNK1 OS=Homo sapiens OX=9606 GN=…	259683.0|285015.0|259740.0|316935.0|316027.0|337832.0	23	7.46548	0.145718	29.8616	1.22976	0.24351	0.999947	-4.55219	CA	no_hit
IRF2BP2	Q7Z5L9-2	Isoform 2 of Interferon regulatory factor 2-binding protein 2 OS=Homo sapiens OX=9606 GN=IRF2BP2	67181.9	8	7.34898	0.160664	28.0526	1.22929	0.243678	0.999947	-4.55239	CA	no_hit
SF3B2	Q13435	Splicing factor 3B subunit 2 OS=Homo sapiens OX=9606 GN=SF3B2 PE=1 SV=2	125832	26	8.13773	0.31354	31.2886	1.22858	0.243933	0.999947	-4.55269	CA	no_hit
NT5C3B	Q969T7|C9J758	7-methylguanosine phosphate-specific 5'-nucleotidase OS=Homo sapiens OX=9606 GN=NT5C3B PE=1 SV=4|7-methylguanosine phosphate-specific 5'-nucleotidase (Fragment) OS=Homo sapiens OX=9606 GN=NT5C3B PE=1 SV=2|7-methylguanosine phosphate-specific 5'-nucleotidase OS=Homo sapiens OX=9606 GN=NT5C3B PE=1 SV=4	40128.2|30192.0	5	6.76499	-0.155814	25.6801	-1.2281	0.244107	0.999947	-4.55289	CA	no_hit
CXorf56	Q9H5V9|Q9H5V9-2|Q9H5V9-3	UPF0428 protein CXorf56 OS=Homo sapiens OX=9606 GN=CXorf56 PE=1 SV=1|Isoform 2 of UPF0428 protein CXorf56 OS=Homo sapiens OX=9606 GN=CXorf56|Isoform 3 of UPF0428 protein CXorf56 OS=Homo sapiens OX=9606 GN=CXorf56	33916.5|27136.1|31260.0	3	6.77723	0.153828	26.7396	1.2276	0.24429	0.999947	-4.5531	CA	no_hit
CWC15	Q9P013	Spliceosome-associated protein CWC15 homolog OS=Homo sapiens OX=9606 GN=CWC15 PE=1 SV=2	33662.1	4	7.45376	0.256193	27.2303	1.22717	0.244444	0.999947	-4.55328	CA	no_hit
APTX	A0A0A0MRW7|A0A5K1VW64|F8W6G5|Q7Z2E3|Q7Z2E3-11|Q7Z2E3-3|Q7Z2E3-4|Q7Z2E3-7|Q7Z2E3-8|Q7Z2E3-9	Aprataxin OS=Homo sapiens OX=9606 GN=APTX PE=1 SV=1|Aprataxin OS=Homo sapiens OX=9606 GN=APTX PE=4 SV=1|Aprataxin (Fragment) OS=Homo sapiens OX=9606 GN=APTX PE=1 SV=1|Aprataxin OS=Homo sapiens OX=9606 GN=APTX PE=1 SV=2|Isoform 11 of Aprataxin OS=Homo sapiens OX=9606 GN=APTX|Isoform 3 of Aprataxin OS=Homo sapiens OX=9606 GN=APTX|Isoform 4 of Aprataxin OS=Homo sapiens OX=9606 GN=APTX|Isoform 7 of A…	48262.6|39192.7|28700.0|51152.1|44319.3|40827.5|36619.0|49517.3|48089.4|42684.6	7	7.37394	0.152557	27.8491	1.22692	0.244534	0.999947	-4.55339	CA	no_hit
AMPD2	A0A5F9UK94|H0Y360|Q01433|Q01433-2	AMP deaminase OS=Homo sapiens OX=9606 GN=AMPD2 PE=1 SV=1|AMP deaminase OS=Homo sapiens OX=9606 GN=AMPD2 PE=1 SV=2|AMP deaminase 2 OS=Homo sapiens OX=9606 GN=AMPD2 PE=1 SV=2|Isoform Ex1A-2-3 of AMP deaminase 2 OS=Homo sapiens OX=9606 GN=AMPD2	107682.0|108847.0|113895.0|103344.0	16	7.38877	-0.159125	29.0004	-1.22687	0.244553	0.999947	-4.55341	CA	no_hit
CDK6	Q00534	Cyclin-dependent kinase 6 OS=Homo sapiens OX=9606 GN=CDK6 PE=1 SV=1	42732.9	5	7.04549	-0.112944	27.4141	-1.22641	0.24472	0.999947	-4.5536	CA	no_hit
EXOC4	Q96A65	Exocyst complex component 4 OS=Homo sapiens OX=9606 GN=EXOC4 PE=1 SV=1	133377	21	7.66207	-0.130218	29.5896	-1.22638	0.244731	0.999947	-4.55362	CA	no_hit
TANGO6	Q9C0B7	Transport and Golgi organization protein 6 homolog OS=Homo sapiens OX=9606 GN=TANGO6 PE=1 SV=2	139246	7	6.50791	-0.123948	26.1139	-1.22636	0.244738	0.999947	-4.55363	CA	no_hit
FARSA	Q9Y285	Phenylalanine--tRNA ligase alpha subunit OS=Homo sapiens OX=9606 GN=FARSA PE=1 SV=3	66102.3	18	8.1595	-0.130641	30.1052	-1.22523	0.245146	0.999947	-4.5541	CA	no_hit
FERMT1	Q9BQL6	Fermitin family homolog 1 OS=Homo sapiens OX=9606 GN=FERMT1 PE=1 SV=1	94137.6	9	7.09898	-0.135209	27.5455	-1.22478	0.245309	0.999947	-4.55429	CA	no_hit
TRIP13	Q15645	Pachytene checkpoint protein 2 homolog OS=Homo sapiens OX=9606 GN=TRIP13 PE=1 SV=2	57076.2	17	7.83359	-0.147065	29.4242	-1.22476	0.245319	0.999947	-4.5543	CA	no_hit
POLDIP3	Q9BY77	Polymerase delta-interacting protein 3 OS=Homo sapiens OX=9606 GN=POLDIP3 PE=1 SV=2	57848.5	8	7.25382	0.205463	28.3922	1.22325	0.245865	0.999947	-4.55493	CA	no_hit
RRP7A	Q9Y3A4	Ribosomal RNA-processing protein 7 homolog A OS=Homo sapiens OX=9606 GN=RRP7A PE=1 SV=2	39786.1	6	7.10236	0.279145	28.4214	1.22201	0.246315	0.999947	-4.55545	CA	no_hit
OCRL	Q01968	Inositol polyphosphate 5-phosphatase OCRL OS=Homo sapiens OX=9606 GN=OCRL PE=1 SV=3	123036	19	7.48171	-0.122834	29.7226	-1.22197	0.246331	0.999947	-4.55547	CA	no_hit
FBXW9	Q5XUX1|Q5XUX1-2|Q5XUX1-3	F-box/WD repeat-containing protein 9 OS=Homo sapiens OX=9606 GN=FBXW9 PE=1 SV=2|Isoform 2 of F-box/WD repeat-containing protein 9 OS=Homo sapiens OX=9606 GN=FBXW9|Isoform 3 of F-box/WD repeat-containing protein 9 OS=Homo sapiens OX=9606 GN=FBXW9|F-box/WD repeat-containing protein 9 OS=Homo sapiens OX=9606 GN=FBXW9 PE=1 SV=2|Isoform 3 of F-box/WD repeat-containing protein 9 OS=Homo sapiens OX=9606…	58111.9|56972.3|54759.3	4	6.45564	-0.113788	24.4921	-1.22033	0.246927	0.999947	-4.55616	CA	no_hit
VPS13D	Q5THJ4|Q5THJ4-2	Vacuolar protein sorting-associated protein 13D OS=Homo sapiens OX=9606 GN=VPS13D PE=1 SV=2|Isoform 2 of Vacuolar protein sorting-associated protein 13D OS=Homo sapiens OX=9606 GN=VPS13D	572030.0|569176.0	7	6.28902	-0.155758	25.3926	-1.22019	0.24698	0.999947	-4.55622	CA	no_hit
KIFBP	A0A1B0GUA3|Q96EK5	KIF-binding protein OS=Homo sapiens OX=9606 GN=KIFBP PE=1 SV=1|KIF-binding protein OS=Homo sapiens OX=9606 GN=KIFBP PE=1 SV=1	88501.3|85229.3	13	7.59859	-0.13696	28.8876	-1.22017	0.246987	0.999947	-4.55623	CA	no_hit
MEST	C9JW74|Q5EB52|Q5EB52-2|C9JWU9|Q5EB52-3	Mesoderm-specific transcript homolog protein OS=Homo sapiens OX=9606 GN=MEST PE=1 SV=2|Mesoderm-specific transcript homolog protein OS=Homo sapiens OX=9606 GN=MEST PE=2 SV=2|Isoform 2 of Mesoderm-specific transcript homolog protein OS=Homo sapiens OX=9606 GN=MEST|Mesoderm-specific transcript homolog protein OS=Homo sapiens OX=9606 GN=MEST PE=1 SV=2|Mesoderm-specific transcript homolog protein (Fr…	41218.4|42513.0|41274.3|27141.9|37443.5	3	6.48398	0.114754	24.7047	1.22017	0.246989	0.999947	-4.55623	CA	no_hit
DMTN	Q08495|Q08495-2|Q08495-3|Q08495-4	Dematin OS=Homo sapiens OX=9606 GN=DMTN PE=1 SV=3|Isoform 2 of Dematin OS=Homo sapiens OX=9606 GN=DMTN|Isoform 3 of Dematin OS=Homo sapiens OX=9606 GN=DMTN|Isoform 4 of Dematin OS=Homo sapiens OX=9606 GN=DMTN	54422.3|51635.9|49229.7|50164.1	3	6.83185	0.26507	24.2527	1.21876	0.247501	0.999947	-4.55682	CA	no_hit
SMYD2	Q9NRG4	N-lysine methyltransferase SMYD2 OS=Homo sapiens OX=9606 GN=SMYD2 PE=1 SV=2	61272.2	5	6.87849	-0.119441	26.5032	-1.21853	0.247587	0.999947	-4.55692	CA	no_hit
PPP2R5A	Q15172|Q15172-2	Serine/threonine-protein phosphatase 2A 56 kDa regulatory subunit alpha isoform OS=Homo sapiens OX=9606 GN=PPP2R5A PE=1 SV=1|Isoform 2 of Serine/threonine-protein phosphatase 2A 56 kDa regulatory subunit alpha isoform OS=Homo sapiens OX=9606 GN=PPP2R5A|Serine/threonine-protein phosphatase 2A 56 kDa regulatory subunit alpha isoform OS=Homo sapiens OX=9606 GN=PPP2R5A PE=1 SV=1	69277.0|61809.9	6	6.93595	-0.168117	26.5641	-1.21848	0.247602	0.999947	-4.55694	CA	no_hit
MRPS31	Q92665	28S ribosomal protein S31, mitochondrial OS=Homo sapiens OX=9606 GN=MRPS31 PE=1 SV=3	56660.2	11	7.65148	0.140609	29.4395	1.21797	0.247791	0.999947	-4.55715	CA	no_hit
WRNIP1	Q96S55|Q96S55-2|Q96S55-3	ATPase WRNIP1 OS=Homo sapiens OX=9606 GN=WRNIP1 PE=1 SV=2|Isoform 2 of ATPase WRNIP1 OS=Homo sapiens OX=9606 GN=WRNIP1|ATPase WRNIP1 OS=Homo sapiens OX=9606 GN=WRNIP1 PE=1 SV=2|Isoform 2 of ATPase WRNIP1 OS=Homo sapiens OX=9606 GN=WRNIP1|Isoform 3 of ATPase WRNIP1 OS=Homo sapiens OX=9606 GN=WRNIP1	81651.1|78921.8|57409.5	9	7.01874	0.332938	28.1632	1.21702	0.248138	0.999947	-4.55755	CA	no_hit
AACS	Q86V21	Acetoacetyl-CoA synthetase OS=Homo sapiens OX=9606 GN=AACS PE=1 SV=1	88138.7	16	7.52179	-0.142885	29.321	-1.21669	0.248259	0.999947	-4.55769	CA	no_hit
DDA1	Q9BW61	DET1- and DDB1-associated protein 1 OS=Homo sapiens OX=9606 GN=DDA1 PE=1 SV=1	14622.8	4	7.01257	0.277414	25.9241	1.21536	0.248745	0.999947	-4.55825	CA	no_hit
TBCB	A0A494C0X0|Q99426	Tubulin-folding cofactor B OS=Homo sapiens OX=9606 GN=TBCB PE=1 SV=1|Tubulin-folding cofactor B OS=Homo sapiens OX=9606 GN=TBCB PE=1 SV=2|Tubulin-folding cofactor B OS=Homo sapiens OX=9606 GN=TBCB PE=1 SV=2	35800.5|31852.5	10	8.32558	-0.182363	29.4839	-1.21373	0.249344	0.999947	-4.55893	CA	no_hit
MRPL24	Q96A35	39S ribosomal protein L24, mitochondrial OS=Homo sapiens OX=9606 GN=MRPL24 PE=1 SV=1	29880.3	11	7.74468	0.121265	28.4939	1.21198	0.249988	0.999947	-4.55966	CA	no_hit
PFKFB3	A0A1W2PR17|Q16875|Q16875-2|Q5VX20|Q5W015	6-phosphofructo-2-kinase/fructose-2,6-bisphosphatase 3 OS=Homo sapiens OX=9606 GN=PFKFB3 PE=1 SV=1|6-phosphofructo-2-kinase/fructose-2,6-bisphosphatase 3 OS=Homo sapiens OX=9606 GN=PFKFB3 PE=1 SV=1|Isoform 2 of 6-phosphofructo-2-kinase/fructose-2,6-bisphosphatase 3 OS=Homo sapiens OX=9606 GN=PFKFB3|6-phosphofructo-2-kinase/fructose-2,6-bisphosphatase 3 OS=Homo sapiens OX=9606 GN=PFKFB3 PE=1 SV=1|…	75175.9|70712.6|69428.9|71254.8|69327.8	14	7.30093	0.112654	28.7901	1.21194	0.250004	0.999947	-4.55968	CA	no_hit
SERPINB6	A0A024QZX5|A0A087X1N8|A0A2R8Y6A7|P35237	Serpin B6 OS=Homo sapiens OX=9606 GN=SERPINB6 PE=1 SV=1|Serpin B6 OS=Homo sapiens OX=9606 GN=SERPINB6 PE=1 SV=1|Serpin B6 (Fragment) OS=Homo sapiens OX=9606 GN=SERPINB6 PE=1 SV=1|Serpin B6 OS=Homo sapiens OX=9606 GN=SERPINB6 PE=1 SV=3|Serpin B6 (Fragment) OS=Homo sapiens OX=9606 GN=SERPINB6 PE=1 SV=1|Serpin B6 OS=Homo sapiens OX=9606 GN=SERPINB6 PE=1 SV=3	51552.0|53957.3|24323.1|51149.8	16	8.09945	-0.15209	30.2971	-1.21032	0.2506	0.999947	-4.56036	CA	no_hit
ZMYND8	Q9ULU4-12|Q9ULU4-13|Q9ULU4-9	Isoform 12 of Protein kinase C-binding protein 1 OS=Homo sapiens OX=9606 GN=ZMYND8|Isoform 13 of Protein kinase C-binding protein 1 OS=Homo sapiens OX=9606 GN=ZMYND8|Isoform 9 of Protein kinase C-binding protein 1 OS=Homo sapiens OX=9606 GN=ZMYND8	163045.0|167222.0|164654.0	12	6.94046	0.260228	28.097	1.20949	0.250908	0.999947	-4.56071	CA	no_hit
ARID1B	A0A1B0GTJ8|A0A1B0GV63|A0A1B0GVK1|A0A1B0GWJ2|A0A3F2YNW7|H0Y7H8|Q8NFD5|Q8NFD5-2|Q8NFD5-3|Q8NFD5-4	AT-rich interactive domain-containing protein 1B (Fragment) OS=Homo sapiens OX=9606 GN=ARID1B PE=1 SV=1|AT-rich interactive domain-containing protein 1B (Fragment) OS=Homo sapiens OX=9606 GN=ARID1B PE=1 SV=1|AT-rich interactive domain-containing protein 1B OS=Homo sapiens OX=9606 GN=ARID1B PE=1 SV=1|AT-rich interactive domain-containing protein 1B OS=Homo sapiens OX=9606 GN=ARID1B PE=1 SV=1|AT-ri…	185787.0|170285.0|190213.0|183948.0|271354.0|213751.0|261698.0|263539.0|267339.0|184573.0	8	6.59295	0.18913	26.6952	1.20726	0.251733	0.999947	-4.56164	CA	no_hit
LDHA	P00338|P00338-2|P00338-3	L-lactate dehydrogenase A chain OS=Homo sapiens OX=9606 GN=LDHA PE=1 SV=2|Isoform 2 of L-lactate dehydrogenase A chain OS=Homo sapiens OX=9606 GN=LDHA|Isoform 3 of L-lactate dehydrogenase A chain OS=Homo sapiens OX=9606 GN=LDHA|L-lactate dehydrogenase A chain OS=Homo sapiens OX=9606 GN=LDHA PE=1 SV=2|Isoform 3 of L-lactate dehydrogenase A chain OS=Homo sapiens OX=9606 GN=LDHA	45468.3|36691.9|49223.2	19	9.47157	-0.137541	32.1487	-1.2069	0.251864	0.999947	-4.56179	CA	no_hit
SEC16A	F1T0I1|O15027|O15027-2|O15027-3|O15027-4|O15027-5	Protein transport protein sec16 OS=Homo sapiens OX=9606 GN=SEC16A PE=1 SV=1|Protein transport protein Sec16A OS=Homo sapiens OX=9606 GN=SEC16A PE=1 SV=4|Isoform 2 of Protein transport protein Sec16A OS=Homo sapiens OX=9606 GN=SEC16A|Isoform 3 of Protein transport protein Sec16A OS=Homo sapiens OX=9606 GN=SEC16A|Isoform 4 of Protein transport protein Sec16A OS=Homo sapiens OX=9606 GN=SEC16A|Isofor…	269728.0|272195.0|267494.0|269874.0|269815.0|274429.0	25	7.42955	0.212646	30.0908	1.20687	0.251876	0.999947	-4.5618	CA	no_hit
MAGI3	Q5TCQ9|Q5TCQ9-1|Q5TCQ9-2|Q5TCQ9-3	Membrane-associated guanylate kinase, WW and PDZ domain-containing protein 3 OS=Homo sapiens OX=9606 GN=MAGI3 PE=1 SV=3|Isoform 4 of Membrane-associated guanylate kinase, WW and PDZ domain-containing protein 3 OS=Homo sapiens OX=9606 GN=MAGI3|Isoform 2 of Membrane-associated guanylate kinase, WW and PDZ domain-containing protein 3 OS=Homo sapiens OX=9606 GN=MAGI3|Isoform 3 of Membrane-associated …	203307.0|205965.0|150142.0|147485.0	5	6.51546	0.136046	25.8679	1.20584	0.252259	0.999947	-4.56223	CA	no_hit
HGS	O14964	Hepatocyte growth factor-regulated tyrosine kinase substrate OS=Homo sapiens OX=9606 GN=HGS PE=1 SV=1	98267.6	15	7.88532	0.134837	29.7125	1.2053	0.252457	0.999947	-4.56245	CA	no_hit
PSMB5	P28074	Proteasome subunit beta type-5 OS=Homo sapiens OX=9606 GN=PSMB5 PE=1 SV=3	31066.9	11	8.60925	-0.131962	29.7242	-1.2042	0.252866	0.999947	-4.56291	CA	no_hit
VPS26B	Q4G0F5	Vacuolar protein sorting-associated protein 26B OS=Homo sapiens OX=9606 GN=VPS26B PE=1 SV=2	47457.8	8	7.12943	-0.105508	27.7056	-1.20384	0.252999	0.999947	-4.56306	CA	no_hit
WDR73	Q6P4I2	WD repeat-containing protein 73 OS=Homo sapiens OX=9606 GN=WDR73 PE=1 SV=1	46183.8	7	7.06868	-0.141572	27.472	-1.20302	0.253306	0.999947	-4.56341	CA	no_hit
TM9SF2	Q99805	Transmembrane 9 superfamily member 2 OS=Homo sapiens OX=9606 GN=TM9SF2 PE=1 SV=1	87760.3	13	8.21742	0.096674	29.8664	1.20269	0.253429	0.999947	-4.56354	CA	no_hit
H2AFY2	Q9P0M6	Core histone macro-H2A.2 OS=Homo sapiens OX=9606 GN=H2AFY2 PE=1 SV=3	54255	11	7.50839	0.247542	29.6926	1.20188	0.253729	0.999947	-4.56388	CA	no_hit
CTDNEP1	O95476	CTD nuclear envelope phosphatase 1 OS=Homo sapiens OX=9606 GN=CTDNEP1 PE=1 SV=2	31515.3	4	6.43165	-0.145383	25.1246	-1.20177	0.253772	0.999947	-4.56393	CA	no_hit
CEP55	Q53EZ4	Centrosomal protein of 55 kDa OS=Homo sapiens OX=9606 GN=CEP55 PE=1 SV=3	69697.7	8	7.1262	0.204625	28.1294	1.20147	0.253881	0.999947	-4.56405	CA	no_hit
PGAM5	Q96HS1	Serine/threonine-protein phosphatase PGAM5, mitochondrial OS=Homo sapiens OX=9606 GN=PGAM5 PE=1 SV=2	35559	14	8.22612	0.191081	30.4372	1.19971	0.254538	0.999947	-4.56478	CA	no_hit
MT-ND2	P03891	NADH-ubiquinone oxidoreductase chain 2 OS=Homo sapiens OX=9606 GN=MT-ND2 PE=1 SV=2	42585.2	2	7.71721	-0.219841	27.2762	-1.19915	0.254747	0.999947	-4.56501	CA	no_hit
SELENOH	A0A087WYP2|Q8IZQ5	Selenoprotein H OS=Homo sapiens OX=9606 GN=SELENOH PE=1 SV=1|Selenoprotein H OS=Homo sapiens OX=9606 GN=SELENOH PE=1 SV=2	17002.7|17153.6	2	6.72926	0.365534	25.8073	1.19897	0.254817	0.999947	-4.56509	CA	no_hit
SFPQ	P23246	Splicing factor, proline- and glutamine-rich OS=Homo sapiens OX=9606 GN=SFPQ PE=1 SV=2	86254.5	27	8.60342	0.38602	32.3557	1.19847	0.255002	0.999947	-4.5653	CA	no_hit
HP1BP3	Q5SSJ5	Heterochromatin protein 1-binding protein 3 OS=Homo sapiens OX=9606 GN=HP1BP3 PE=1 SV=1	85486.7	13	7.91197	0.357158	30.1833	1.19763	0.255319	0.999947	-4.56565	CA	no_hit
POLE4	Q9NR33	DNA polymerase epsilon subunit 4 OS=Homo sapiens OX=9606 GN=POLE4 PE=1 SV=2	13836.4	3	6.67401	0.296093	24.4556	1.19669	0.25567	0.999947	-4.56604	CA	no_hit
GRIPAP1	Q4V328	GRIP1-associated protein 1 OS=Homo sapiens OX=9606 GN=GRIPAP1 PE=1 SV=2	116367	19	7.73677	0.157713	29.5472	1.19479	0.256383	0.999947	-4.56683	CA	no_hit
IMMT	C9J406|Q16891|Q16891-2|Q16891-4	MICOS complex subunit MIC60 OS=Homo sapiens OX=9606 GN=IMMT PE=1 SV=1|MICOS complex subunit MIC60 OS=Homo sapiens OX=9606 GN=IMMT PE=1 SV=1|Isoform 2 of MICOS complex subunit MIC60 OS=Homo sapiens OX=9606 GN=IMMT|MICOS complex subunit MIC60 OS=Homo sapiens OX=9606 GN=IMMT PE=1 SV=1|Isoform 2 of MICOS complex subunit MIC60 OS=Homo sapiens OX=9606 GN=IMMT|Isoform 4 of MICOS complex subunit MIC60 OS…	89198.8|101365.0|100313.0|101236.0	41	8.7322	0.200611	32.0389	1.19477	0.256389	0.999947	-4.56683	CA	no_hit
PPP1R8	Q12972	Nuclear inhibitor of protein phosphatase 1 OS=Homo sapiens OX=9606 GN=PPP1R8 PE=1 SV=2	46839.5	5	6.85988	0.137694	26.2175	1.19336	0.256921	0.999947	-4.56742	CA	no_hit
NDRG3	Q5TH30|Q9UGV2|Q9UGV2-2|Q9UGV2-3	NDRG family member 3, isoform CRA_c OS=Homo sapiens OX=9606 GN=NDRG3 PE=1 SV=1|Protein NDRG3 OS=Homo sapiens OX=9606 GN=NDRG3 PE=1 SV=2|Isoform 2 of Protein NDRG3 OS=Homo sapiens OX=9606 GN=NDRG3|Isoform 3 of Protein NDRG3 OS=Homo sapiens OX=9606 GN=NDRG3	47291.1|45850.4|44367.8|34905.8	4	6.81323	-0.152426	25.7554	-1.19309	0.257023	0.999947	-4.56753	CA	no_hit
PPP2R1A	P30153	Serine/threonine-protein phosphatase 2A 65 kDa regulatory subunit A alpha isoform OS=Homo sapiens OX=9606 GN=PPP2R1A PE=1 SV=4	75799.8	20	8.6951	-0.139372	31.0562	-1.19284	0.257114	0.999947	-4.56763	CA	no_hit
MTA1	E7ESY4|Q13330|Q13330-3	Metastasis-associated protein MTA1 OS=Homo sapiens OX=9606 GN=MTA1 PE=1 SV=1|Metastasis-associated protein MTA1 OS=Homo sapiens OX=9606 GN=MTA1 PE=1 SV=2|Isoform 3 of Metastasis-associated protein MTA1 OS=Homo sapiens OX=9606 GN=MTA1	93392.9|95413.1|93459.2	14	7.29957	0.160117	28.1952	1.19224	0.257341	0.999947	-4.56788	CA	no_hit
DGAT1	A0A0A0MR74|O75907	Diacylglycerol O-acyltransferase 1 OS=Homo sapiens OX=9606 GN=DGAT1 PE=1 SV=1|Diacylglycerol O-acyltransferase 1 OS=Homo sapiens OX=9606 GN=DGAT1 PE=1 SV=2|Diacylglycerol O-acyltransferase 1 OS=Homo sapiens OX=9606 GN=DGAT1 PE=1 SV=2	35675.9|60261.8	4	6.75575	0.1484	25.0052	1.19115	0.257752	0.999947	-4.56833	CA	no_hit
UBE3A	A0A0D9SG77|A0A1B0GVL3|Q05086|Q05086-2|Q05086-3	Ubiquitin-protein ligase E3A OS=Homo sapiens OX=9606 GN=UBE3A PE=1 SV=1|Ubiquitin-protein ligase E3A OS=Homo sapiens OX=9606 GN=UBE3A PE=1 SV=1|Ubiquitin-protein ligase E3A OS=Homo sapiens OX=9606 GN=UBE3A PE=1 SV=4|Isoform I of Ubiquitin-protein ligase E3A OS=Homo sapiens OX=9606 GN=UBE3A|Isoform III of Ubiquitin-protein ligase E3A OS=Homo sapiens OX=9606 GN=UBE3A|Ubiquitin-protein ligase E3A OS…	105309.0|111984.0|121366.0|117983.0|120477.0	20	7.532	-0.145077	29.6158	-1.19112	0.257762	0.999947	-4.56834	CA	no_hit
TSEN54	Q7Z6J9	tRNA-splicing endonuclease subunit Sen54 OS=Homo sapiens OX=9606 GN=TSEN54 PE=1 SV=3	65988.6	5	6.91606	0.172622	26.9741	1.19077	0.257895	0.999947	-4.56849	CA	no_hit
SPECC1	Q5M775|Q5M775-4	Cytospin-B OS=Homo sapiens OX=9606 GN=SPECC1 PE=1 SV=1|Isoform 4 of Cytospin-B OS=Homo sapiens OX=9606 GN=SPECC1|Cytospin-B OS=Homo sapiens OX=9606 GN=SPECC1 PE=1 SV=1	145358.0|134891.0	20	7.35737	0.231378	29.2723	1.18933	0.258438	0.999947	-4.56908	CA	no_hit
MORF4L1	B3KTM8|H0YMJ0|Q9UBU8-2	Mortality factor 4-like protein 1 OS=Homo sapiens OX=9606 GN=MORF4L1 PE=1 SV=1|Mortality factor 4-like protein 1 (Fragment) OS=Homo sapiens OX=9606 GN=MORF4L1 PE=1 SV=1|Isoform 2 of Mortality factor 4-like protein 1 OS=Homo sapiens OX=9606 GN=MORF4L1|Mortality factor 4-like protein 1 OS=Homo sapiens OX=9606 GN=MORF4L1 PE=1 SV=1|Isoform 2 of Mortality factor 4-like protein 1 OS=Homo sapiens OX=960…	51069.2|37790.9|48881.2	6	6.98308	0.210017	26.6964	1.18902	0.258559	0.999947	-4.56922	CA	no_hit
SPNS1	H3BMF4|Q9H2V7|Q9H2V7-2|Q9H2V7-3|Q9H2V7-4	Protein spinster homolog 1 OS=Homo sapiens OX=9606 GN=SPNS1 PE=1 SV=1|Protein spinster homolog 1 OS=Homo sapiens OX=9606 GN=SPNS1 PE=1 SV=1|Isoform 2 of Protein spinster homolog 1 OS=Homo sapiens OX=9606 GN=SPNS1|Isoform 3 of Protein spinster homolog 1 OS=Homo sapiens OX=9606 GN=SPNS1|Protein spinster homolog 1 OS=Homo sapiens OX=9606 GN=SPNS1 PE=1 SV=1|Protein spinster homolog 1 OS=Homo sapiens …	63462.4|58266.7|52859.0|50540.9|50419.8	4	6.72835	0.144336	24.815	1.18796	0.258956	0.999947	-4.56965	CA	no_hit
LIN7A	O14910	Protein lin-7 homolog A OS=Homo sapiens OX=9606 GN=LIN7A PE=1 SV=2	30657.7	4	7.03165	0.149919	26.2693	1.18793	0.258971	0.999947	-4.56967	CA	no_hit
MED7	O43513	Mediator of RNA polymerase II transcription subunit 7 OS=Homo sapiens OX=9606 GN=MED7 PE=1 SV=1	31410.5	3	6.18171	0.172262	25.243	1.18764	0.25908	0.999947	-4.56978	CA	no_hit
HDHD2	K7ER15|Q9H0R4|Q9H0R4-2	Haloacid dehalogenase-like hydrolase domain-containing protein 2 (Fragment) OS=Homo sapiens OX=9606 GN=HDHD2 PE=1 SV=1|Haloacid dehalogenase-like hydrolase domain-containing protein 2 OS=Homo sapiens OX=9606 GN=HDHD2 PE=1 SV=1|Haloacid dehalogenase-like hydrolase domain-containing protein 2 (Fragment) OS=Homo sapiens OX=9606 GN=HDHD2 PE=1 SV=1|Haloacid dehalogenase-like hydrolase domain-containin…	26544.7|33613.3|21734.6	3	7.05183	-0.118916	26.8773	-1.18648	0.259518	0.999947	-4.57026	CA	no_hit
TIPRL	O75663	TIP41-like protein OS=Homo sapiens OX=9606 GN=TIPRL PE=1 SV=2	37431.7	13	7.90143	-0.124451	29.0595	-1.18493	0.260107	0.999947	-4.5709	CA	no_hit
SWAP70	Q9UH65	Switch-associated protein 70 OS=Homo sapiens OX=9606 GN=SWAP70 PE=1 SV=1	89735.5	17	7.49789	-0.129893	29.3038	-1.1849	0.260117	0.999947	-4.57091	CA	no_hit
CAPN1	P07384	Calpain-1 catalytic subunit OS=Homo sapiens OX=9606 GN=CAPN1 PE=1 SV=1	93721.1	27	8.23565	-0.113222	30.8798	-1.18441	0.260305	0.999947	-4.57112	CA	no_hit
NAA15	A0A0B4J1W3|Q9BXJ9	N-alpha-acetyltransferase 15, NatA auxiliary subunit OS=Homo sapiens OX=9606 GN=NAA15 PE=1 SV=1|N-alpha-acetyltransferase 15, NatA auxiliary subunit OS=Homo sapiens OX=9606 GN=NAA15 PE=1 SV=1|N-alpha-acetyltransferase 15, NatA auxiliary subunit OS=Homo sapiens OX=9606 GN=NAA15 PE=1 SV=1	128857.0|128928.0	35	8.23791	-0.145384	31.252	-1.18262	0.260986	0.999947	-4.57185	CA	no_hit
SKIV2L	Q15477	Helicase SKI2W OS=Homo sapiens OX=9606 GN=SKIV2L PE=1 SV=3	153543	27	7.41036	-0.129335	29.4937	-1.18252	0.261023	0.999947	-4.57189	CA	no_hit
H3-2	Q5TEC6	Histone H3 OS=Homo sapiens OX=9606 GN=H3-2 PE=1 SV=1	19432.3	2	7.68131	0.268956	29.3725	1.18228	0.261114	0.999947	-4.57199	CA	no_hit
PPP2R5D	E9PFR3|Q14738	Serine/threonine-protein phosphatase 2A 56 kDa regulatory subunit OS=Homo sapiens OX=9606 GN=PPP2R5D PE=1 SV=1|Serine/threonine-protein phosphatase 2A 56 kDa regulatory subunit delta isoform OS=Homo sapiens OX=9606 GN=PPP2R5D PE=1 SV=1	85233.8|86108.3	9	7.54268	-0.148885	28.4729	-1.18155	0.261394	0.999947	-4.5723	CA	no_hit
MLKL	Q8NB16	Mixed lineage kinase domain-like protein OS=Homo sapiens OX=9606 GN=MLKL PE=1 SV=1	68095.7	11	7.43081	-0.144719	28.2895	-1.18048	0.261801	0.999947	-4.57274	CA	no_hit
CSTA	C9J0E4|P01040	Cystatin-A OS=Homo sapiens OX=9606 GN=CSTA PE=1 SV=1|Cystatin-A OS=Homo sapiens OX=9606 GN=CSTA PE=1 SV=1	9211.23|14650.2	3	7.00706	-0.502766	26.9155	-1.17982	0.262055	0.999947	-4.57301	CA	no_hit
MRPS18B	Q9Y676	28S ribosomal protein S18b, mitochondrial OS=Homo sapiens OX=9606 GN=MRPS18B PE=1 SV=1	33673.8	4	7.52832	0.265137	27.117	1.17923	0.262281	0.999947	-4.57325	CA	no_hit
WDR76	A0A0C4DFX7|Q9H967	WD repeat-containing protein 76 OS=Homo sapiens OX=9606 GN=WDR76 PE=1 SV=1|WD repeat-containing protein 76 OS=Homo sapiens OX=9606 GN=WDR76 PE=1 SV=2	74815.6|83547.3	2	6.56384	0.218142	25.576	1.17885	0.262426	0.999947	-4.57341	CA	no_hit
TLN1	Q9Y490	Talin-1 OS=Homo sapiens OX=9606 GN=TLN1 PE=1 SV=3	321047	98	8.63198	-0.133134	33.0841	-1.17871	0.262479	0.999947	-4.57346	CA	no_hit
ASMTL	O95671|O95671-2|O95671-3	Probable bifunctional dTTP/UTP pyrophosphatase/methyltransferase protein OS=Homo sapiens OX=9606 GN=ASMTL PE=1 SV=3|Isoform 2 of Probable bifunctional dTTP/UTP pyrophosphatase/methyltransferase protein OS=Homo sapiens OX=9606 GN=ASMTL|Probable bifunctional dTTP/UTP pyrophosphatase/methyltransferase protein OS=Homo sapiens OX=9606 GN=ASMTL PE=1 SV=3|Isoform 2 of Probable bifunctional dTTP/UTP pyro…	80201.5|78234.3|71909.7	6	6.59677	-0.200087	25.8941	-1.17796	0.262764	0.999947	-4.57377	CA	no_hit
PTGS2	P35354	Prostaglandin G/H synthase 2 OS=Homo sapiens OX=9606 GN=PTGS2 PE=1 SV=2	80036.1	12	7.24823	0.118977	28.0522	1.17755	0.262922	0.999947	-4.57394	CA	no_hit
CISD3	P0C7P0	CDGSH iron-sulfur domain-containing protein 3, mitochondrial OS=Homo sapiens OX=9606 GN=CISD3 PE=1 SV=1	17286.4	4	7.31095	0.188684	27.2201	1.17738	0.262989	0.999947	-4.57401	CA	no_hit
BAX	Q07812|Q07812-2|Q07812-5|Q07812-8	Apoptosis regulator BAX OS=Homo sapiens OX=9606 GN=BAX PE=1 SV=1|Isoform Beta of Apoptosis regulator BAX OS=Homo sapiens OX=9606 GN=BAX|Isoform Epsilon of Apoptosis regulator BAX OS=Homo sapiens OX=9606 GN=BAX|Isoform Sigma of Apoptosis regulator BAX OS=Homo sapiens OX=9606 GN=BAX|Apoptosis regulator BAX OS=Homo sapiens OX=9606 GN=BAX PE=1 SV=1|Isoform Beta of Apoptosis regulator BAX OS=Homo sapi…	24022.7|26809.1|20778.8|22557.0	7	7.8142	-0.21019	28.8535	-1.1764	0.263363	0.999947	-4.57441	CA	no_hit
BRCC3	P46736|P46736-2|P46736-3	Lys-63-specific deubiquitinase BRCC36 OS=Homo sapiens OX=9606 GN=BRCC3 PE=1 SV=2|Isoform 1 of Lys-63-specific deubiquitinase BRCC36 OS=Homo sapiens OX=9606 GN=BRCC3|Isoform 3 of Lys-63-specific deubiquitinase BRCC36 OS=Homo sapiens OX=9606 GN=BRCC3|Lys-63-specific deubiquitinase BRCC36 OS=Homo sapiens OX=9606 GN=BRCC3 PE=1 SV=2|Isoform 1 of Lys-63-specific deubiquitinase BRCC36 OS=Homo sapiens OX…	40707.1|37482.5|37569.6	8	7.2935	0.125196	26.9784	1.17627	0.263414	0.999947	-4.57447	CA	no_hit
H1-4	P10412	Histone H1.4 OS=Homo sapiens OX=9606 GN=H1-4 PE=1 SV=2	40712.9	5	8.59579	0.396471	30.0483	1.17511	0.263858	0.999947	-4.57494	CA	no_hit
SNX6	A0A0A0MRI2|Q9UNH7	Sorting nexin OS=Homo sapiens OX=9606 GN=SNX6 PE=1 SV=1|Sorting nexin-6 OS=Homo sapiens OX=9606 GN=SNX6 PE=1 SV=1	60284.8|59073.1	16	8.18436	-0.142668	29.58	-1.17485	0.263959	0.999947	-4.57505	CA	no_hit
SORT1	Q99523|Q99523-2	Sortilin OS=Homo sapiens OX=9606 GN=SORT1 PE=1 SV=3|Isoform 2 of Sortilin OS=Homo sapiens OX=9606 GN=SORT1	105147.0|89798.0	2	6.65155	0.119996	25.6034	1.17433	0.264158	0.999947	-4.57526	CA	no_hit
BZW2	E7ETZ4|Q9Y6E2	Basic leucine zipper and W2 domain-containing protein 2 (Fragment) OS=Homo sapiens OX=9606 GN=BZW2 PE=1 SV=1|Basic leucine zipper and W2 domain-containing protein 2 OS=Homo sapiens OX=9606 GN=BZW2 PE=1 SV=1	60192.5|61441.0	21	8.05084	-0.169087	30.7457	-1.17374	0.264386	0.999947	-4.5755	CA	no_hit
CCDC50	Q8IVM0|Q8IVM0-2	Coiled-coil domain-containing protein 50 OS=Homo sapiens OX=9606 GN=CCDC50 PE=1 SV=1|Coiled-coil domain-containing protein 50 OS=Homo sapiens OX=9606 GN=CCDC50 PE=1 SV=1|Isoform 2 of Coiled-coil domain-containing protein 50 OS=Homo sapiens OX=9606 GN=CCDC50	46257.1|71249.3	10	7.3258	0.217129	27.7523	1.17355	0.26446	0.999947	-4.57558	CA	no_hit
RHEB	Q15382	GTP-binding protein Rheb OS=Homo sapiens OX=9606 GN=RHEB PE=1 SV=1	24800.4	8	8.09406	-0.164279	29.2699	-1.17305	0.264651	0.999947	-4.57579	CA	no_hit
BIN3	Q9NQY0	Bridging integrator 3 OS=Homo sapiens OX=9606 GN=BIN3 PE=1 SV=1	37004.3	4	6.74206	0.176978	26.1944	1.17287	0.264721	0.999947	-4.57586	CA	no_hit
SETDB1	E9PRF4	Histone-lysine N-methyltransferase SETDB1 (Fragment) OS=Homo sapiens OX=9606 GN=SETDB1 PE=1 SV=1	169416	7	6.68923	0.131143	26.7568	1.17136	0.265304	0.999947	-4.57648	CA	no_hit
TP53	A0A0U1RQC9|E7EQX7|J3KP33|P04637|P04637-2|P04637-3|P04637-4|P04637-5|P04637-6|A0A087WT22|A0A087WXZ1|A0A087WZU8|A0A087X1Q1|E7ESS1|P04637-7|P04637-8|P04637-9	Cellular tumor antigen p53 OS=Homo sapiens OX=9606 GN=TP53 PE=1 SV=1|Cellular tumor antigen p53 OS=Homo sapiens OX=9606 GN=TP53 PE=1 SV=1|Cellular tumor antigen p53 OS=Homo sapiens OX=9606 GN=TP53 PE=1 SV=1|Cellular tumor antigen p53 OS=Homo sapiens OX=9606 GN=TP53 PE=1 SV=4|Isoform 2 of Cellular tumor antigen p53 OS=Homo sapiens OX=9606 GN=TP53|Isoform 3 of Cellular tumor antigen p53 OS=Homo sap…	51938.4|34112.9|42434.4|50279.7|42383.2|42753.4|45645.4|37748.9|38119.1|23988.1|23617.8|49208.2|31514.4|25476.9|34915.1|27018.6|27388.8	2	6.39851	0.169688	23.7932	1.17073	0.265548	0.999947	-4.57674	CA	no_hit
GDI2	P50395|Q5SX86	Rab GDP dissociation inhibitor beta OS=Homo sapiens OX=9606 GN=GDI2 PE=1 SV=2|Rab GDP dissociation inhibitor beta OS=Homo sapiens OX=9606 GN=GDI2 PE=1 SV=2|Rab GDP dissociation inhibitor (Fragment) OS=Homo sapiens OX=9606 GN=GDI2 PE=1 SV=1	62342.7|22334.3	22	8.5718	-0.13993	31.2389	-1.17032	0.265704	0.999947	-4.5769	CA	no_hit
IFT122	Q9HBG6|Q9HBG6-3|Q9HBG6-5|Q9HBG6-6|Q9HBG6-10|Q9HBG6-4|Q9HBG6-7|Q9HBG6-8	Intraflagellar transport protein 122 homolog OS=Homo sapiens OX=9606 GN=IFT122 PE=1 SV=2|Isoform 3 of Intraflagellar transport protein 122 homolog OS=Homo sapiens OX=9606 GN=IFT122|Isoform 5 of Intraflagellar transport protein 122 homolog OS=Homo sapiens OX=9606 GN=IFT122|Isoform 6 of Intraflagellar transport protein 122 homolog OS=Homo sapiens OX=9606 GN=IFT122|Intraflagellar transport protein 1…	170558.0|163379.0|177388.0|170281.0|150051.0|156465.0|142623.0|149801.0	7	6.66123	-0.149467	26.4189	-1.16956	0.265997	0.999947	-4.57721	CA	no_hit
OLA1	J3KQ32|Q9NTK5|Q9NTK5-3	Obg-like ATPase 1 OS=Homo sapiens OX=9606 GN=OLA1 PE=1 SV=1|Obg-like ATPase 1 OS=Homo sapiens OX=9606 GN=OLA1 PE=1 SV=2|Isoform 3 of Obg-like ATPase 1 OS=Homo sapiens OX=9606 GN=OLA1	60825.8|58328.5|40166.4	21	8.54548	-0.114538	30.7877	-1.16944	0.266045	0.999947	-4.57727	CA	no_hit
SMG7	E9PD50|Q92540|Q92540-2|Q92540-4|Q92540-5	Protein SMG7 OS=Homo sapiens OX=9606 GN=SMG7 PE=1 SV=1|Protein SMG7 OS=Homo sapiens OX=9606 GN=SMG7 PE=1 SV=2|Isoform 2 of Protein SMG7 OS=Homo sapiens OX=9606 GN=SMG7|Isoform 4 of Protein SMG7 OS=Homo sapiens OX=9606 GN=SMG7|Isoform 5 of Protein SMG7 OS=Homo sapiens OX=9606 GN=SMG7	150873.0|148877.0|140519.0|153356.0|149145.0	7	6.61606	0.140738	26.6352	1.16944	0.266045	0.999947	-4.57727	CA	no_hit
DIAPH2	A6NML8|C9J6U3|K4DI95|O60879|O60879-2|O60879-3	Diaphanous homolog 2 (Drosophila), isoform CRA_c OS=Homo sapiens OX=9606 GN=DIAPH2 PE=1 SV=3|Protein diaphanous homolog 2 OS=Homo sapiens OX=9606 GN=DIAPH2 PE=1 SV=3|Diaphanous homolog 2 (Drosophila), isoform CRA_a OS=Homo sapiens OX=9606 GN=DIAPH2 PE=1 SV=1|Protein diaphanous homolog 2 OS=Homo sapiens OX=9606 GN=DIAPH2 PE=1 SV=1|Isoform 2 of Protein diaphanous homolog 2 OS=Homo sapiens OX=9606 G…	155994.0|156982.0|156956.0|155967.0|156430.0	20	7.35748	-0.129469	29.1802	-1.16935	0.266079	0.999947	-4.5773	CA	no_hit
BORCS6	Q96GS4	BLOC-1-related complex subunit 6 OS=Homo sapiens OX=9606 GN=BORCS6 PE=1 SV=2	39428	5	6.72539	0.129445	26.3678	1.16819	0.26653	0.999947	-4.57778	CA	no_hit
DNAAF5	Q86Y56	Dynein assembly factor 5, axonemal OS=Homo sapiens OX=9606 GN=DNAAF5 PE=1 SV=4	102075	20	7.6376	-0.144205	29.4408	-1.16817	0.266538	0.999947	-4.57779	CA	no_hit
CEP290	J3KNF5|O15078	Centrosomal protein of 290 kDa OS=Homo sapiens OX=9606 GN=CEP290 PE=1 SV=1|Centrosomal protein of 290 kDa OS=Homo sapiens OX=9606 GN=CEP290 PE=1 SV=2	384745.0|384587.0	5	7.16921	0.129708	27.6688	1.16645	0.267204	0.999947	-4.57849	CA	no_hit
ATXN2	A0A2R8Y5A6|A0A2R8YDM9	Ataxin-2 OS=Homo sapiens OX=9606 GN=ATXN2 PE=1 SV=1|Ataxin-2 OS=Homo sapiens OX=9606 GN=ATXN2 PE=1 SV=1	141901.0|120484.0	16	7.35738	0.216635	29.777	1.16623	0.267289	0.999947	-4.57858	CA	no_hit
UCK2	A0A2R8Y653|Q9BZX2	Uridine-cytidine kinase 2 OS=Homo sapiens OX=9606 GN=UCK2 PE=1 SV=1|Uridine-cytidine kinase 2 OS=Homo sapiens OX=9606 GN=UCK2 PE=1 SV=1|Uridine-cytidine kinase 2 OS=Homo sapiens OX=9606 GN=UCK2 PE=1 SV=1	32182.3|34319.4	9	7.38091	-0.122772	27.6806	-1.16433	0.268028	0.999947	-4.57935	CA	no_hit
PSMB7	Q99436	Proteasome subunit beta type-7 OS=Homo sapiens OX=9606 GN=PSMB7 PE=1 SV=1	35459.9	7	8.31709	-0.153719	29.8661	-1.16432	0.268033	0.999947	-4.57936	CA	no_hit
ISG15	P05161	Ubiquitin-like protein ISG15 OS=Homo sapiens OX=9606 GN=ISG15 PE=1 SV=5	20367	9	7.8404	-0.16262	28.1286	-1.16424	0.268063	0.999947	-4.57939	CA	no_hit
SERINC3	Q13530|Q13530-2	Serine incorporator 3 OS=Homo sapiens OX=9606 GN=SERINC3 PE=2 SV=2|Isoform 2 of Serine incorporator 3 OS=Homo sapiens OX=9606 GN=SERINC3	59485.1|53083.9	3	6.88161	0.128975	26.5581	1.16291	0.268581	0.999947	-4.57993	CA	no_hit
PXK	A0A0C4DG95|E9PD56|H7BYG4|Q7Z7A4|Q7Z7A4-2|Q7Z7A4-4|Q7Z7A4-6|Q7Z7A4-7|W5RWE6|Q7Z7A4-5	PX domain-containing protein kinase-like protein OS=Homo sapiens OX=9606 GN=PXK PE=1 SV=1|PX domain-containing protein kinase-like protein OS=Homo sapiens OX=9606 GN=PXK PE=1 SV=1|PX domain-containing protein kinase-like protein OS=Homo sapiens OX=9606 GN=PXK PE=1 SV=1|PX domain-containing protein kinase-like protein OS=Homo sapiens OX=9606 GN=PXK PE=1 SV=1|Isoform 2 of PX domain-containing prote…	79112.2|68905.1|70839.1|80385.3|72897.1|78327.2|76393.2|69986.6|78531.4|62749.8	4	6.38528	0.244551	26.885	1.16267	0.268672	0.999947	-4.58003	CA	no_hit
SCD	O00767	Acyl-CoA desaturase OS=Homo sapiens OX=9606 GN=SCD PE=1 SV=2	47447.1	6	7.54391	-0.130467	28.0297	-1.1619	0.268975	0.999947	-4.58034	CA	no_hit
ITCH	Q96J02|Q96J02-2	E3 ubiquitin-protein ligase Itchy homolog OS=Homo sapiens OX=9606 GN=ITCH PE=1 SV=2|Isoform 2 of E3 ubiquitin-protein ligase Itchy homolog OS=Homo sapiens OX=9606 GN=ITCH	117891.0|113539.0	10	7.07799	-0.110988	27.8095	-1.16174	0.269035	0.999947	-4.58041	CA	no_hit
EPM2AIP1	Q7L775	EPM2A-interacting protein 1 OS=Homo sapiens OX=9606 GN=EPM2AIP1 PE=1 SV=1	78861.7	11	7.14419	-0.131488	27.648	-1.16117	0.269257	0.999947	-4.58064	CA	no_hit
RPUSD2	Q8IZ73	RNA pseudouridylate synthase domain-containing protein 2 OS=Homo sapiens OX=9606 GN=RPUSD2 PE=1 SV=2	70057	8	6.82097	0.142899	26.9682	1.15998	0.269722	0.999947	-4.58112	CA	no_hit
NUCB2	P80303	Nucleobindin-2 OS=Homo sapiens OX=9606 GN=NUCB2 PE=1 SV=3	65211.6	15	7.97989	0.265739	29.031	1.15826	0.270396	0.999947	-4.58182	CA	no_hit
MIDEAS	A0A1C7CYX1	Mitotic deacetylase-associated SANT domain protein OS=Homo sapiens OX=9606 GN=MIDEAS PE=1 SV=1	141858	6	6.73873	0.259308	27.5698	1.15811	0.270455	0.999947	-4.58189	CA	no_hit
GOLGA1	Q92805	Golgin subfamily A member 1 OS=Homo sapiens OX=9606 GN=GOLGA1 PE=1 SV=3	106192	22	7.36505	0.217551	28.794	1.15789	0.27054	0.999947	-4.58197	CA	no_hit
PGM2L1	Q6PCE3	Glucose 1,6-bisphosphate synthase OS=Homo sapiens OX=9606 GN=PGM2L1 PE=1 SV=3	86576.2	18	7.60764	-0.122377	29.407	-1.15753	0.27068	0.999947	-4.58212	CA	no_hit
SCRN1	Q12765	Secernin-1 OS=Homo sapiens OX=9606 GN=SCRN1 PE=1 SV=2	53368.1	13	7.69871	-0.126522	28.5583	-1.15742	0.270725	0.999947	-4.58216	CA	no_hit
UROD	P06132|A0A1B0GVZ4	Uroporphyrinogen decarboxylase OS=Homo sapiens OX=9606 GN=UROD PE=1 SV=2|Uroporphyrinogen decarboxylase OS=Homo sapiens OX=9606 GN=UROD PE=1 SV=1|Uroporphyrinogen decarboxylase OS=Homo sapiens OX=9606 GN=UROD PE=1 SV=2	44753.4|38762.0	9	7.68597	-0.164326	27.6207	-1.15725	0.270792	0.999947	-4.58223	CA	no_hit
METTL5	B8ZZC8|B8ZZE3|Q9NRN9	Methyltransferase-like protein 5 OS=Homo sapiens OX=9606 GN=METTL5 PE=1 SV=1|Methyltransferase like 5, isoform CRA_b OS=Homo sapiens OX=9606 GN=METTL5 PE=1 SV=1|Methyltransferase-like protein 5 OS=Homo sapiens OX=9606 GN=METTL5 PE=1 SV=1|Methyltransferase-like protein 5 OS=Homo sapiens OX=9606 GN=METTL5 PE=1 SV=1	34181.6|28491.4|29826.1	6	6.96412	-0.141954	26.6623	-1.15724	0.270794	0.999947	-4.58224	CA	no_hit
MYO6	A0A1Y0BRN3|Q5JVM0	Myosin VI transcript variant 007 OS=Homo sapiens OX=9606 GN=MYO6 PE=1 SV=1|Myosin VI transcript variant 007 OS=Homo sapiens OX=9606 GN=MYO6 PE=1 SV=1|Unconventional myosin-VI (Fragment) OS=Homo sapiens OX=9606 GN=MYO6 PE=1 SV=1	186992.0|26178.3	35	7.65012	-0.129044	30.445	-1.15716	0.270827	0.999947	-4.58227	CA	no_hit
TXNRD1	A0A087WSW9|A0A087WSY9|Q16881|Q16881-3|Q16881-4|Q16881-7	Thioredoxin reductase 1, cytoplasmic OS=Homo sapiens OX=9606 GN=TXNRD1 PE=1 SV=1|Thioredoxin reductase 1, cytoplasmic OS=Homo sapiens OX=9606 GN=TXNRD1 PE=1 SV=2|Thioredoxin reductase 1, cytoplasmic OS=Homo sapiens OX=9606 GN=TXNRD1 PE=1 SV=3|Isoform 3 of Thioredoxin reductase 1, cytoplasmic OS=Homo sapiens OX=9606 GN=TXNRD1|Isoform 4 of Thioredoxin reductase 1, cytoplasmic OS=Homo sapiens OX=960…	72646.2|85978.4|86129.3|79158.8|73044.2|60709.4	27	8.95339	-0.122166	31.5452	-1.15692	0.27092	0.999947	-4.58237	CA	no_hit
UBA6	A0AVT1	Ubiquitin-like modifier-activating enzyme 6 OS=Homo sapiens OX=9606 GN=UBA6 PE=1 SV=1	142326	26	7.63435	-0.128231	29.8992	-1.15682	0.27096	0.999947	-4.58241	CA	no_hit
SARS1	P49591|Q5T5C7	Serine--tRNA ligase, cytoplasmic OS=Homo sapiens OX=9606 GN=SARS1 PE=1 SV=3|Seryl-tRNA synthetase 1 OS=Homo sapiens OX=9606 GN=SARS1 PE=1 SV=1	72942.6|76693.8	20	7.92526	-0.119814	29.786	-1.15652	0.271078	0.999947	-4.58253	CA	no_hit
HEBP1	Q9NRV9	Heme-binding protein 1 OS=Homo sapiens OX=9606 GN=HEBP1 PE=1 SV=1	26064.9	9	7.26837	-0.215649	28.1679	-1.15538	0.271524	0.999947	-4.58299	CA	no_hit
ZYG11B	A8DPD7|Q9C0D3	Protein zyg-11 homolog B OS=Homo sapiens OX=9606 GN=ZYG11B PE=1 SV=1|Protein zyg-11 homolog B OS=Homo sapiens OX=9606 GN=ZYG11B PE=1 SV=2	73396.5|96206.3	4	6.66042	-0.119387	26.0376	-1.1552	0.271598	0.999947	-4.58307	CA	no_hit
HOOK3	Q86VS8	Protein Hook homolog 3 OS=Homo sapiens OX=9606 GN=HOOK3 PE=1 SV=2	102334	21	7.42247	0.215764	29.1818	1.15488	0.271721	0.999947	-4.58319	CA	no_hit
SYVN1	Q86TM6|Q86TM6-2|Q86TM6-3	E3 ubiquitin-protein ligase synoviolin OS=Homo sapiens OX=9606 GN=SYVN1 PE=1 SV=2|Isoform 2 of E3 ubiquitin-protein ligase synoviolin OS=Homo sapiens OX=9606 GN=SYVN1|Isoform 3 of E3 ubiquitin-protein ligase synoviolin OS=Homo sapiens OX=9606 GN=SYVN1	72108.2|66102.1|72037.2	6	7.71298	-0.157564	28.0013	-1.15466	0.27181	0.999947	-4.58329	CA	no_hit
SNTB1	Q13884	Beta-1-syntrophin OS=Homo sapiens OX=9606 GN=SNTB1 PE=1 SV=3	68406	3	6.78435	0.144909	25.728	1.15459	0.271837	0.999947	-4.58331	CA	no_hit
DERA	Q9Y315	Deoxyribose-phosphate aldolase OS=Homo sapiens OX=9606 GN=DERA PE=1 SV=2	42186.1	12	7.88248	-0.128396	28.3511	-1.15295	0.272483	0.999947	-4.58398	CA	no_hit
STRA6	J3KQI6|Q9BX79|Q9BX79-4|Q9BX79-5|Q9BX79-6	Receptor for retinol uptake STRA6 OS=Homo sapiens OX=9606 GN=STRA6 PE=1 SV=1|Receptor for retinol uptake STRA6 OS=Homo sapiens OX=9606 GN=STRA6 PE=1 SV=1|Isoform 4 of Receptor for retinol uptake STRA6 OS=Homo sapiens OX=9606 GN=STRA6|Isoform 5 of Receptor for retinol uptake STRA6 OS=Homo sapiens OX=9606 GN=STRA6|Isoform 6 of Receptor for retinol uptake STRA6 OS=Homo sapiens OX=9606 GN=STRA6	77962.7|79121.3|84281.2|83841.8|81113.3	4	7.11128	-0.126536	26.3828	-1.15283	0.272528	0.999947	-4.58403	CA	no_hit
SRP72	O76094	Signal recognition particle subunit SRP72 OS=Homo sapiens OX=9606 GN=SRP72 PE=1 SV=3	97945.7	23	8.17786	0.310768	30.6205	1.15273	0.272568	0.999947	-4.58407	CA	no_hit
VCL	P18206|P18206-2	Vinculin OS=Homo sapiens OX=9606 GN=VCL PE=1 SV=4|Isoform 1 of Vinculin OS=Homo sapiens OX=9606 GN=VCL	148020.0|140339.0	82	8.76196	-0.140927	32.7337	-1.15102	0.273243	0.999947	-4.58476	CA	no_hit
GLUD2	P49448	Glutamate dehydrogenase 2, mitochondrial OS=Homo sapiens OX=9606 GN=GLUD2 PE=1 SV=2	72384.8	5	7.20196	0.109427	26.4493	1.15077	0.273341	0.999947	-4.58486	CA	no_hit
MFSD6	Q6ZSS7	Major facilitator superfamily domain-containing protein 6 OS=Homo sapiens OX=9606 GN=MFSD6 PE=1 SV=2	97899.2	4	6.44283	-0.121282	24.5121	-1.15036	0.273505	0.999947	-4.58503	CA	no_hit
NDUFAF1	Q9Y375	Complex I intermediate-associated protein 30, mitochondrial OS=Homo sapiens OX=9606 GN=NDUFAF1 PE=1 SV=2	44793.8	6	6.84961	0.111754	25.9098	1.14942	0.273877	0.999947	-4.58541	CA	no_hit
SIRT6	Q8N6T7|Q8N6T7-2	NAD-dependent protein deacetylase sirtuin-6 OS=Homo sapiens OX=9606 GN=SIRT6 PE=1 SV=2|Isoform 2 of NAD-dependent protein deacetylase sirtuin-6 OS=Homo sapiens OX=9606 GN=SIRT6	45216.4|42164.0	4	6.52644	0.161056	24.6638	1.14928	0.27393	0.999947	-4.58546	CA	no_hit
UTP14A	Q9BVJ6	U3 small nucleolar RNA-associated protein 14 homolog A OS=Homo sapiens OX=9606 GN=UTP14A PE=1 SV=1	113344	24	7.40334	0.256143	30.2983	1.14609	0.275194	0.999947	-4.58675	CA	no_hit
UGT1A6	P19224|P19224-3	UDP-glucuronosyltransferase 1-6 OS=Homo sapiens OX=9606 GN=UGT1A6 PE=1 SV=2|Isoform 3 of UDP-glucuronosyltransferase 1-6 OS=Homo sapiens OX=9606 GN=UGT1A6	71681.5|58556.1	6	6.9562	-0.105256	26.2994	-1.14573	0.275339	0.999947	-4.5869	CA	no_hit
TAF4	O00268|A0A0G2JRY5	Transcription initiation factor TFIID subunit 4 OS=Homo sapiens OX=9606 GN=TAF4 PE=1 SV=2|Transcription initiation factor TFIID subunit 4 (Fragment) OS=Homo sapiens OX=9606 GN=TAF4 PE=1 SV=1|Transcription initiation factor TFIID subunit 4 OS=Homo sapiens OX=9606 GN=TAF4 PE=1 SV=2	123413.0|58952.4	3	6.47201	0.260255	25.2773	1.14503	0.275618	0.999947	-4.58718	CA	no_hit
EHBP1L1	Q8N3D4	EH domain-binding protein 1-like protein 1 OS=Homo sapiens OX=9606 GN=EHBP1L1 PE=1 SV=2	178677	19	7.22871	0.10247	28.7617	1.14452	0.275821	0.999947	-4.58739	CA	no_hit
HPS5	Q9UPZ3|Q9UPZ3-2	Hermansky-Pudlak syndrome 5 protein OS=Homo sapiens OX=9606 GN=HPS5 PE=1 SV=2|Hermansky-Pudlak syndrome 5 protein OS=Homo sapiens OX=9606 GN=HPS5 PE=1 SV=2|Isoform 2 of Hermansky-Pudlak syndrome 5 protein OS=Homo sapiens OX=9606 GN=HPS5	148168.0|133860.0	6	6.69284	-0.121809	26.5965	-1.14426	0.275922	0.999947	-4.58749	CA	no_hit
ENOSF1	A0A3F2YNX7|Q7L5Y1|Q7L5Y1-4|Q7L5Y1-5|J3QL81|Q7L5Y1-2|Q7L5Y1-6	Mitochondrial enolase superfamily member 1 OS=Homo sapiens OX=9606 GN=ENOSF1 PE=1 SV=1|Mitochondrial enolase superfamily member 1 OS=Homo sapiens OX=9606 GN=ENOSF1 PE=1 SV=1|Isoform 4 of Mitochondrial enolase superfamily member 1 OS=Homo sapiens OX=9606 GN=ENOSF1|Isoform 5 of Mitochondrial enolase superfamily member 1 OS=Homo sapiens OX=9606 GN=ENOSF1|Mitochondrial enolase superfamily member 1 OS…	63390.4|60116.2|60498.9|62795.8|49190.1|50940.6|36231.3	3	6.67185	-0.145788	26.1797	-1.14417	0.275957	0.999947	-4.58753	CA	no_hit
PCF11	O94913|E9PQ01	Pre-mRNA cleavage complex 2 protein Pcf11 OS=Homo sapiens OX=9606 GN=PCF11 PE=1 SV=3|Pre-mRNA cleavage complex 2 protein Pcf11 (Fragment) OS=Homo sapiens OX=9606 GN=PCF11 PE=1 SV=8|Pre-mRNA cleavage complex 2 protein Pcf11 OS=Homo sapiens OX=9606 GN=PCF11 PE=1 SV=3	205874.0|142239.0	19	7.28055	0.157192	29.7308	1.14279	0.276506	0.999947	-4.58808	CA	no_hit
COPB1	P53618	Coatomer subunit beta OS=Homo sapiens OX=9606 GN=COPB1 PE=1 SV=3	129204	37	8.4451	-0.136479	31.4066	-1.14111	0.277179	0.999947	-4.58876	CA	no_hit
LRRC59	Q96AG4	Leucine-rich repeat-containing protein 59 OS=Homo sapiens OX=9606 GN=LRRC59 PE=1 SV=1	46563.7	12	8.57505	0.216752	30.429	1.1409	0.277261	0.999947	-4.58884	CA	no_hit
CAP1	Q01518|Q01518-2	Adenylyl cyclase-associated protein 1 OS=Homo sapiens OX=9606 GN=CAP1 PE=1 SV=5|Isoform 2 of Adenylyl cyclase-associated protein 1 OS=Homo sapiens OX=9606 GN=CAP1	65710.0|65638.9	21	8.85778	-0.144633	31.3648	-1.13742	0.278655	0.999947	-4.59024	CA	no_hit
MRPS12	O15235	28S ribosomal protein S12, mitochondrial OS=Homo sapiens OX=9606 GN=MRPS12 PE=1 SV=1	18908.4	3	7.30275	0.227564	28.1068	1.13713	0.278769	0.999947	-4.59036	CA	no_hit
NEDD4	P46934-4	Isoform 4 of E3 ubiquitin-protein ligase NEDD4 OS=Homo sapiens OX=9606 GN=NEDD4	118735	16	7.5837	-0.100172	29.0158	-1.13628	0.279113	0.999947	-4.5907	CA	no_hit
PPIP5K2	A0A087WZV0|O43314|O43314-2	Inositol hexakisphosphate and diphosphoinositol-pentakisphosphate kinase OS=Homo sapiens OX=9606 GN=PPIP5K2 PE=1 SV=1|Inositol hexakisphosphate and diphosphoinositol-pentakisphosphate kinase 2 OS=Homo sapiens OX=9606 GN=PPIP5K2 PE=1 SV=3|Isoform 2 of Inositol hexakisphosphate and diphosphoinositol-pentakisphosphate kinase 2 OS=Homo sapiens OX=9606 GN=PPIP5K2|Inositol hexakisphosphate and diphosph…	175091.0|170777.0|168173.0	11	7.03472	-0.113554	27.6429	-1.13583	0.27929	0.999947	-4.59088	CA	no_hit
PIK3R2	O00459	Phosphatidylinositol 3-kinase regulatory subunit beta OS=Homo sapiens OX=9606 GN=PIK3R2 PE=1 SV=2	92180.1	4	6.45052	0.292661	24.8346	1.1346	0.279786	0.999947	-4.59137	CA	no_hit
SLC26A6	G3XAC1|Q9BXS9|Q9BXS9-3|Q9BXS9-7	Solute carrier family 26 member 6 OS=Homo sapiens OX=9606 GN=SLC26A6 PE=1 SV=1|Solute carrier family 26 member 6 OS=Homo sapiens OX=9606 GN=SLC26A6 PE=1 SV=1|Isoform 3 of Solute carrier family 26 member 6 OS=Homo sapiens OX=9606 GN=SLC26A6|Isoform 7 of Solute carrier family 26 member 6 OS=Homo sapiens OX=9606 GN=SLC26A6	81985.0|93713.2|93585.1|89832.1	7	7.13519	-0.122152	27.3516	-1.13459	0.279789	0.999947	-4.59138	CA	no_hit
LIMS1	P48059|P48059-2|P48059-3|P48059-4|P48059-5	LIM and senescent cell antigen-like-containing domain protein 1 OS=Homo sapiens OX=9606 GN=LIMS1 PE=1 SV=4|Isoform 2 of LIM and senescent cell antigen-like-containing domain protein 1 OS=Homo sapiens OX=9606 GN=LIMS1|Isoform 3 of LIM and senescent cell antigen-like-containing domain protein 1 OS=Homo sapiens OX=9606 GN=LIMS1|Isoform 4 of LIM and senescent cell antigen-like-containing domain prote…	47929.6|49099.1|56394.9|48435.7|52551.0	8	7.71605	-0.132768	28.8303	-1.13436	0.279883	0.999947	-4.59147	CA	no_hit
GTF3C4	Q9UKN8	General transcription factor 3C polypeptide 4 OS=Homo sapiens OX=9606 GN=GTF3C4 PE=1 SV=2	107837	18	7.4478	0.161005	28.9197	1.13422	0.279939	0.999947	-4.59153	CA	no_hit
LRRFIP2	Q9Y608|Q9Y608-4	Leucine-rich repeat flightless-interacting protein 2 OS=Homo sapiens OX=9606 GN=LRRFIP2 PE=1 SV=1|Leucine-rich repeat flightless-interacting protein 2 OS=Homo sapiens OX=9606 GN=LRRFIP2 PE=1 SV=1|Isoform 4 of Leucine-rich repeat flightless-interacting protein 2 OS=Homo sapiens OX=9606 GN=LRRFIP2	98776.6|59634.3	12	7.5904	0.281369	28.2819	1.13413	0.279974	0.999947	-4.59156	CA	no_hit
RPL37	P61927	60S ribosomal protein L37 OS=Homo sapiens OX=9606 GN=RPL37 PE=1 SV=2	15557.8	6	8.57148	0.233309	29.9199	1.13404	0.280011	0.999947	-4.5916	CA	no_hit
PRRC2C	E7EPN9|Q9Y520|Q9Y520-4|Q9Y520-5|Q9Y520-6|Q9Y520-7	Protein PRRC2C OS=Homo sapiens OX=9606 GN=PRRC2C PE=1 SV=1|Protein PRRC2C OS=Homo sapiens OX=9606 GN=PRRC2C PE=1 SV=4|Isoform 4 of Protein PRRC2C OS=Homo sapiens OX=9606 GN=PRRC2C|Isoform 5 of Protein PRRC2C OS=Homo sapiens OX=9606 GN=PRRC2C|Isoform 6 of Protein PRRC2C OS=Homo sapiens OX=9606 GN=PRRC2C|Isoform 7 of Protein PRRC2C OS=Homo sapiens OX=9606 GN=PRRC2C	372739.0|381533.0|372568.0|377260.0|364625.0|381703.0	39	7.57119	0.165242	30.9512	1.13403	0.280015	0.999947	-4.5916	CA	no_hit
EIF5B	A0A087WUT6|O60841	Eukaryotic translation initiation factor 5B OS=Homo sapiens OX=9606 GN=EIF5B PE=1 SV=1|Eukaryotic translation initiation factor 5B OS=Homo sapiens OX=9606 GN=EIF5B PE=1 SV=4	195027.0|194868.0	33	8.07784	-0.117147	31.2383	-1.13391	0.280063	0.999947	-4.59165	CA	no_hit
LRCH3	Q96II8|Q96II8-4	DISP complex protein LRCH3 OS=Homo sapiens OX=9606 GN=LRCH3 PE=1 SV=2|Isoform 4 of DISP complex protein LRCH3 OS=Homo sapiens OX=9606 GN=LRCH3	95327.0|89028.7	5	6.7446	0.307195	26.6514	1.13363	0.280175	0.999947	-4.59176	CA	no_hit
NSL1	Q96IY1	Kinetochore-associated protein NSL1 homolog OS=Homo sapiens OX=9606 GN=NSL1 PE=1 SV=3	39841.6	4	6.54725	0.13067	25.969	1.1323	0.280713	0.999947	-4.5923	CA	no_hit
PIP	P12273	Prolactin-inducible protein OS=Homo sapiens OX=9606 GN=PIP PE=1 SV=1	19889	5	6.9541	-1.53292	25.0754	-1.13184	0.280896	0.999947	-4.59248	CA	no_hit
MRPS24	Q96EL2	28S ribosomal protein S24, mitochondrial OS=Homo sapiens OX=9606 GN=MRPS24 PE=1 SV=1	22387.1	4	7.55021	0.161205	27.1912	1.13122	0.28115	0.999947	-4.59273	CA	no_hit
SMAP2	A0A087WV97|Q8WU79|Q8WU79-2|Q8WU79-3	Stromal membrane-associated protein 2 OS=Homo sapiens OX=9606 GN=SMAP2 PE=1 SV=1|Stromal membrane-associated protein 2 OS=Homo sapiens OX=9606 GN=SMAP2 PE=1 SV=1|Isoform 2 of Stromal membrane-associated protein 2 OS=Homo sapiens OX=9606 GN=SMAP2|Stromal membrane-associated protein 2 OS=Homo sapiens OX=9606 GN=SMAP2 PE=1 SV=1|Stromal membrane-associated protein 2 OS=Homo sapiens OX=9606 GN=SMAP2 P…	55401.9|56223.1|51902.9|45334.4	5	6.56677	0.110618	25.9996	1.13053	0.281425	0.999947	-4.593	CA	no_hit
DDRGK1	Q96HY6	DDRGK domain-containing protein 1 OS=Homo sapiens OX=9606 GN=DDRGK1 PE=1 SV=2	40761	4	7.32705	0.196134	26.7706	1.13016	0.281574	0.999947	-4.59315	CA	no_hit
LRCH1	Q9Y2L9|Q9Y2L9-2|Q9Y2L9-3	Leucine-rich repeat and calponin homology domain-containing protein 1 OS=Homo sapiens OX=9606 GN=LRCH1 PE=1 SV=3|Isoform 2 of Leucine-rich repeat and calponin homology domain-containing protein 1 OS=Homo sapiens OX=9606 GN=LRCH1|Isoform 3 of Leucine-rich repeat and calponin homology domain-containing protein 1 OS=Homo sapiens OX=9606 GN=LRCH1|Isoform 2 of Leucine-rich repeat and calponin homology…	91280.9|88127.4|95014.6	6	6.42147	0.144192	25.8648	1.13009	0.281603	0.999947	-4.59318	CA	no_hit
EIF2B1	Q14232	Translation initiation factor eIF-2B subunit alpha OS=Homo sapiens OX=9606 GN=EIF2B1 PE=1 SV=1	41885.3	14	7.95324	-0.16488	29.4276	-1.12982	0.281713	0.999947	-4.59329	CA	no_hit
MFAP1	P55081	Microfibrillar-associated protein 1 OS=Homo sapiens OX=9606 GN=MFAP1 PE=1 SV=2	65311.7	3	7.32477	0.262995	28.381	1.12975	0.281743	0.999947	-4.59332	CA	no_hit
EIF2B3	Q9NR50	Translation initiation factor eIF-2B subunit gamma OS=Homo sapiens OX=9606 GN=EIF2B3 PE=1 SV=1	61596.5	14	7.38375	-0.122128	28.6551	-1.12971	0.281759	0.999947	-4.59333	CA	no_hit
TTC37	Q6PGP7	Tetratricopeptide repeat protein 37 OS=Homo sapiens OX=9606 GN=TTC37 PE=1 SV=1	215815	29	7.53165	-0.11729	30.3873	-1.1296	0.281803	0.999947	-4.59338	CA	no_hit
RASA1	E9PGC0|P20936|P20936-2|P20936-4	Ras GTPase-activating protein 1 OS=Homo sapiens OX=9606 GN=RASA1 PE=1 SV=1|Ras GTPase-activating protein 1 OS=Homo sapiens OX=9606 GN=RASA1 PE=1 SV=1|Isoform 2 of Ras GTPase-activating protein 1 OS=Homo sapiens OX=9606 GN=RASA1|Isoform 4 of Ras GTPase-activating protein 1 OS=Homo sapiens OX=9606 GN=RASA1	120890.0|135798.0|119442.0|120589.0	18	7.18025	-0.139161	28.2802	-1.12927	0.281934	0.999947	-4.59351	CA	no_hit
MED12	Q93074|Q93074-2|Q93074-3	Mediator of RNA polymerase II transcription subunit 12 OS=Homo sapiens OX=9606 GN=MED12 PE=1 SV=4|Isoform 2 of Mediator of RNA polymerase II transcription subunit 12 OS=Homo sapiens OX=9606 GN=MED12|Isoform 3 of Mediator of RNA polymerase II transcription subunit 12 OS=Homo sapiens OX=9606 GN=MED12	277911.0|278528.0|277783.0	18	6.73334	0.185608	27.9046	1.12828	0.282336	0.999947	-4.5939	CA	no_hit
SIRT5	Q9NXA8|Q9NXA8-2	NAD-dependent protein deacylase sirtuin-5, mitochondrial OS=Homo sapiens OX=9606 GN=SIRT5 PE=1 SV=2|Isoform 2 of NAD-dependent protein deacylase sirtuin-5, mitochondrial OS=Homo sapiens OX=9606 GN=SIRT5	38802.3|37786.1	4	6.84765	0.109353	25.8326	1.12827	0.28234	0.999947	-4.59391	CA	no_hit
ADH5	P11766	Alcohol dehydrogenase class-3 OS=Homo sapiens OX=9606 GN=ADH5 PE=1 SV=4	50288.3	13	8.44324	-0.119609	30.4271	-1.12789	0.282497	0.999947	-4.59406	CA	no_hit
COPG2	Q9UBF2	Coatomer subunit gamma-2 OS=Homo sapiens OX=9606 GN=COPG2 PE=1 SV=1	114215	19	7.80114	-0.144381	29.6627	-1.12767	0.282583	0.999947	-4.59415	CA	no_hit
TPT1	A0A0B4J2C3|P13693|Q5W0H4	Translationally-controlled tumor protein OS=Homo sapiens OX=9606 GN=TPT1 PE=1 SV=1|Translationally-controlled tumor protein OS=Homo sapiens OX=9606 GN=TPT1 PE=1 SV=1|Translationally-controlled tumor protein OS=Homo sapiens OX=9606 GN=TPT1 PE=1 SV=1	27350.3|23955.5|27101.5	8	8.73558	-0.14411	30.069	-1.12736	0.28271	0.999947	-4.59427	CA	no_hit
ASAP2	O43150|O43150-2	Arf-GAP with SH3 domain, ANK repeat and PH domain-containing protein 2 OS=Homo sapiens OX=9606 GN=ASAP2 PE=1 SV=3|Isoform 2 of Arf-GAP with SH3 domain, ANK repeat and PH domain-containing protein 2 OS=Homo sapiens OX=9606 GN=ASAP2	136867.0|131898.0	6	7.23214	-0.121212	27.242	-1.12724	0.282756	0.999947	-4.59432	CA	no_hit
CUEDC1	Q9NWM3|Q9NWM3-2|J3QLQ8	CUE domain-containing protein 1 OS=Homo sapiens OX=9606 GN=CUEDC1 PE=1 SV=1|Isoform 2 of CUE domain-containing protein 1 OS=Homo sapiens OX=9606 GN=CUEDC1|CUE domain-containing protein 1 OS=Homo sapiens OX=9606 GN=CUEDC1 PE=1 SV=1|CUE domain-containing protein 1 OS=Homo sapiens OX=9606 GN=CUEDC1 PE=1 SV=1	47878.6|44112.6|33014.6	3	6.3877	0.128303	24.957	1.12719	0.282777	0.999947	-4.59434	CA	no_hit
LDHB	A0A5F9ZHM4|P07195	L-lactate dehydrogenase OS=Homo sapiens OX=9606 GN=LDHB PE=1 SV=1|L-lactate dehydrogenase B chain OS=Homo sapiens OX=9606 GN=LDHB PE=1 SV=2	45576.0|44809.6	17	9.34379	-0.153761	32.2602	-1.12669	0.282982	0.999947	-4.59454	CA	no_hit
ADD3	Q9UEY8|Q9UEY8-2	Gamma-adducin OS=Homo sapiens OX=9606 GN=ADD3 PE=1 SV=1|Isoform 1 of Gamma-adducin OS=Homo sapiens OX=9606 GN=ADD3	94961.9|91176.0	8	7.205	0.105187	27.5551	1.12626	0.283154	0.999947	-4.59471	CA	no_hit
RAB5B	P61020	Ras-related protein Rab-5B OS=Homo sapiens OX=9606 GN=RAB5B PE=1 SV=1	28178.9	7	7.60435	-0.139635	27.2672	-1.12582	0.283334	0.999947	-4.59489	CA	no_hit
ATIC	P31939	Bifunctional purine biosynthesis protein PURH OS=Homo sapiens OX=9606 GN=ATIC PE=1 SV=3	76344.2	30	8.38021	-0.116253	30.9158	-1.12573	0.28337	0.999947	-4.59492	CA	no_hit
HPRT1	P00492	Hypoxanthine-guanine phosphoribosyltransferase OS=Homo sapiens OX=9606 GN=HPRT1 PE=1 SV=2	29659	9	8.26486	-0.143225	29.1916	-1.12567	0.283396	0.999947	-4.59495	CA	no_hit
ABCF2	Q9UG63|Q9UG63-2	ATP-binding cassette sub-family F member 2 OS=Homo sapiens OX=9606 GN=ABCF2 PE=1 SV=2|Isoform 2 of ATP-binding cassette sub-family F member 2 OS=Homo sapiens OX=9606 GN=ABCF2	88242.0|89451.7	21	8.17203	-0.164378	30.6501	-1.12376	0.284171	0.999947	-4.59571	CA	no_hit
CPEB4	B7ZLQ8|E5RJM0|Q17RY0|Q17RY0-2	CPEB4 protein OS=Homo sapiens OX=9606 GN=CPEB4 PE=1 SV=1|Cytoplasmic polyadenylation element-binding protein 4 OS=Homo sapiens OX=9606 GN=CPEB4 PE=1 SV=1|Cytoplasmic polyadenylation element-binding protein 4 OS=Homo sapiens OX=9606 GN=CPEB4 PE=1 SV=1|Isoform 2 of Cytoplasmic polyadenylation element-binding protein 4 OS=Homo sapiens OX=9606 GN=CPEB4	86697.9|77863.8|89551.4|87714.5	2	6.40365	0.276068	23.9193	1.12204	0.284871	0.999947	-4.59639	CA	no_hit
FAM207A	Q9NSI2|Q9NSI2-2	Protein FAM207A OS=Homo sapiens OX=9606 GN=FAM207A PE=1 SV=2|Isoform B of Protein FAM207A OS=Homo sapiens OX=9606 GN=FAM207A	29699.7|28188.9	3	6.73619	0.248367	25.4332	1.12203	0.284878	0.999947	-4.5964	CA	no_hit
OAS1	F8VXY3|P00973|P00973-2|P00973-3|P00973-4	2'-5'-oligoadenylate synthase 1 OS=Homo sapiens OX=9606 GN=OAS1 PE=1 SV=1|2'-5'-oligoadenylate synthase 1 OS=Homo sapiens OX=9606 GN=OAS1 PE=1 SV=4|Isoform p41 of 2'-5'-oligoadenylate synthase 1 OS=Homo sapiens OX=9606 GN=OAS1|Isoform p48 of 2'-5'-oligoadenylate synthase 1 OS=Homo sapiens OX=9606 GN=OAS1|Isoform p44 of 2'-5'-oligoadenylate synthase 1 OS=Homo sapiens OX=9606 GN=OAS1	49623.8|54536.0|49889.0|55971.0|52091.2	6	6.96647	-0.135495	26.8562	-1.12066	0.285437	0.999947	-4.59694	CA	no_hit
FTSJ1	Q9UET6|Q9UET6-2	Putative tRNA (cytidine(32)/guanosine(34)-2'-O)-methyltransferase OS=Homo sapiens OX=9606 GN=FTSJ1 PE=1 SV=2|Putative tRNA (cytidine(32)/guanosine(34)-2'-O)-methyltransferase OS=Homo sapiens OX=9606 GN=FTSJ1 PE=1 SV=2|Isoform 2 of Putative tRNA (cytidine(32)/guanosine(34)-2'-O)-methyltransferase OS=Homo sapiens OX=9606 GN=FTSJ1	41550.6|41338.5	4	6.93137	0.136991	26.8191	1.11963	0.285856	0.999947	-4.59735	CA	no_hit
H1-3	P16402	Histone H1.3 OS=Homo sapiens OX=9606 GN=H1-3 PE=1 SV=2	40892.9	7	8.5009	0.373456	30.4172	1.11924	0.286015	0.999947	-4.5975	CA	no_hit
EPRS1	P07814	Bifunctional glutamate/proline--tRNA ligase OS=Homo sapiens OX=9606 GN=EPRS1 PE=1 SV=5	217102	67	8.61216	-0.12108	32.5971	-1.11891	0.28615	0.999947	-4.59764	CA	no_hit
LARS1	Q9P2J5	Leucine--tRNA ligase, cytoplasmic OS=Homo sapiens OX=9606 GN=LARS1 PE=1 SV=2	169344	47	8.30812	-0.131493	31.8094	-1.11761	0.286682	0.999947	-4.59815	CA	no_hit
ALG1	Q9BT22	Chitobiosyldiphosphodolichol beta-mannosyltransferase OS=Homo sapiens OX=9606 GN=ALG1 PE=1 SV=2	58758	9	7.94817	-0.140452	28.2811	-1.11732	0.286804	0.999947	-4.59827	CA	no_hit
ACP1	P24666|P24666-2	Low molecular weight phosphotyrosine protein phosphatase OS=Homo sapiens OX=9606 GN=ACP1 PE=1 SV=3|Isoform 2 of Low molecular weight phosphotyrosine protein phosphatase OS=Homo sapiens OX=9606 GN=ACP1	21529.0|21464.1	9	7.83413	-0.142931	28.4525	-1.11718	0.286859	0.999947	-4.59832	CA	no_hit
RHOC	P08134|Q5JR08	Rho-related GTP-binding protein RhoC OS=Homo sapiens OX=9606 GN=RHOC PE=1 SV=1|Rho-related GTP-binding protein RhoC (Fragment) OS=Homo sapiens OX=9606 GN=RHOC PE=1 SV=8	26897.5|26357.2	3	7.11618	-0.144817	27.8161	-1.11706	0.286908	0.999947	-4.59837	CA	no_hit
IL18	Q14116|Q14116-2	Interleukin-18 OS=Homo sapiens OX=9606 GN=IL18 PE=1 SV=1|Isoform 2 of Interleukin-18 OS=Homo sapiens OX=9606 GN=IL18	27160.0|26729.9	9	8.18864	-0.14461	29.1067	-1.11652	0.28713	0.999947	-4.59859	CA	no_hit
ITFG1	F5GXC5|H3BUJ1|Q8TB96	T-cell immunomodulatory protein OS=Homo sapiens OX=9606 GN=ITFG1 PE=1 SV=1|T-cell immunomodulatory protein (Fragment) OS=Homo sapiens OX=9606 GN=ITFG1 PE=1 SV=2|T-cell immunomodulatory protein OS=Homo sapiens OX=9606 GN=ITFG1 PE=1 SV=1|T-cell immunomodulatory protein OS=Homo sapiens OX=9606 GN=ITFG1 PE=1 SV=1	58613.2|23839.0|76981.4	5	6.68508	0.132522	25.6131	1.1163	0.287222	0.999947	-4.59867	CA	no_hit
WDCP	Q9H6R7|Q9H6R7-2	WD repeat and coiled-coil-containing protein OS=Homo sapiens OX=9606 GN=WDCP PE=1 SV=1|Isoform 2 of WD repeat and coiled-coil-containing protein OS=Homo sapiens OX=9606 GN=WDCP	91538.6|79478.4	4	6.69665	0.158601	26.5561	1.11622	0.287253	0.999947	-4.5987	CA	no_hit
PSMB6	P28072	Proteasome subunit beta type-6 OS=Homo sapiens OX=9606 GN=PSMB6 PE=1 SV=4	26786.4	7	8.51883	-0.177688	29.1486	-1.11618	0.287269	0.999947	-4.59872	CA	no_hit
PPP2R5E	Q16537|Q16537-2	Serine/threonine-protein phosphatase 2A 56 kDa regulatory subunit epsilon isoform OS=Homo sapiens OX=9606 GN=PPP2R5E PE=1 SV=1|Isoform 2 of Serine/threonine-protein phosphatase 2A 56 kDa regulatory subunit epsilon isoform OS=Homo sapiens OX=9606 GN=PPP2R5E	66319.3|65358.7	8	7.46554	-0.137408	27.9479	-1.11542	0.287582	0.999947	-4.59902	CA	no_hit
SNX7	Q9UNH6|Q9UNH6-3	Sorting nexin-7 OS=Homo sapiens OX=9606 GN=SNX7 PE=1 SV=1|Isoform 3 of Sorting nexin-7 OS=Homo sapiens OX=9606 GN=SNX7	54684.9|61302.0	6	7.08951	-0.11809	27.8017	-1.11337	0.288425	0.999947	-4.59983	CA	no_hit
QARS1	P47897	Glutamine--tRNA ligase OS=Homo sapiens OX=9606 GN=QARS1 PE=1 SV=1	102649	32	8.22105	-0.127275	31.0602	-1.11315	0.288515	0.999947	-4.59992	CA	no_hit
KHDRBS1	Q07666	KH domain-containing, RNA-binding, signal transduction-associated protein 1 OS=Homo sapiens OX=9606 GN=KHDRBS1 PE=1 SV=1	55612.2	7	8.20129	0.164155	29.8114	1.11291	0.288613	0.999947	-4.60001	CA	no_hit
MISP	Q8IVT2	Mitotic interactor and substrate of PLK1 OS=Homo sapiens OX=9606 GN=MISP PE=1 SV=1	82174.6	25	8.18993	0.279697	31.1855	1.1123	0.288865	0.999947	-4.60026	CA	no_hit
STIP1	P31948	Stress-induced-phosphoprotein 1 OS=Homo sapiens OX=9606 GN=STIP1 PE=1 SV=1	82391.7	39	8.87665	0.302457	32.0423	1.11094	0.289428	0.999947	-4.6008	CA	no_hit
PLCXD3	Q63HM9	PI-PLC X domain-containing protein 3 OS=Homo sapiens OX=9606 GN=PLCXD3 PE=2 SV=2	42734.8	3	6.39698	-0.116311	24.4708	-1.11062	0.289561	0.999947	-4.60092	CA	no_hit
SCAF8	A0A0A0MT33|Q9UPN6|Q9UPN6-2	SR-related and CTD-associated factor 8 OS=Homo sapiens OX=9606 GN=SCAF8 PE=1 SV=1|SR-related and CTD-associated factor 8 OS=Homo sapiens OX=9606 GN=SCAF8 PE=1 SV=1|Isoform 2 of SR-related and CTD-associated factor 8 OS=Homo sapiens OX=9606 GN=SCAF8	167476.0|158723.0|165830.0	13	7.55128	0.122279	28.9645	1.10993	0.289845	0.999947	-4.6012	CA	no_hit
MAPK3	P27361	Mitogen-activated protein kinase 3 OS=Homo sapiens OX=9606 GN=MAPK3 PE=1 SV=4	49838.6	12	7.23114	-0.151348	27.9202	-1.10968	0.289949	0.999947	-4.60129	CA	no_hit
SAMD4B	M0QZ22|Q5PRF9|A0A087WZT0	Protein Smaug homolog 2 OS=Homo sapiens OX=9606 GN=SAMD4B PE=1 SV=1|Protein Smaug homolog 2 OS=Homo sapiens OX=9606 GN=SAMD4B PE=1 SV=1|Protein Smaug homolog 2 OS=Homo sapiens OX=9606 GN=SAMD4B PE=1 SV=1|Protein Smaug homolog 2 OS=Homo sapiens OX=9606 GN=SAMD4B PE=1 SV=1|Protein Smaug homolog 2 OS=Homo sapiens OX=9606 GN=SAMD4B PE=1 SV=1	84277.1|84714.4|81342.9	3	6.98161	0.126861	27.2578	1.10964	0.289963	0.999947	-4.60131	CA	no_hit
NCAPD2	Q15021	Condensin complex subunit 1 OS=Homo sapiens OX=9606 GN=NCAPD2 PE=1 SV=3	183149	29	7.73933	-0.135736	30.2604	-1.10924	0.29013	0.999947	-4.60147	CA	no_hit
EXOC5	O00471|A0A0A0MSI8	Exocyst complex component 5 OS=Homo sapiens OX=9606 GN=EXOC5 PE=1 SV=1|Exocyst complex component 5 OS=Homo sapiens OX=9606 GN=EXOC5 PE=1 SV=1|Exocyst complex component 5 OS=Homo sapiens OX=9606 GN=EXOC5 PE=1 SV=1	99558.5|100129.0	22	7.58158	-0.119278	29.797	-1.10794	0.290666	0.999947	-4.60198	CA	no_hit
EIF4H	Q15056	Eukaryotic translation initiation factor 4H OS=Homo sapiens OX=9606 GN=EIF4H PE=1 SV=5	30771.7	12	8.2256	-0.162259	29.61	-1.10759	0.29081	0.999947	-4.60212	CA	no_hit
SURF2	Q15527	Surfeit locus protein 2 OS=Homo sapiens OX=9606 GN=SURF2 PE=1 SV=3	37082	2	7.04817	0.217009	25.8999	1.10748	0.290858	0.999947	-4.60216	CA	no_hit
THADA	Q6YHU6|Q6YHU6-3	Thyroid adenoma-associated protein OS=Homo sapiens OX=9606 GN=THADA PE=1 SV=1|Isoform 3 of Thyroid adenoma-associated protein OS=Homo sapiens OX=9606 GN=THADA	251482.0|242756.0	20	7.05935	-0.114904	28.3361	-1.10709	0.29102	0.999947	-4.60232	CA	no_hit
TMEM65	Q6PI78	Transmembrane protein 65 OS=Homo sapiens OX=9606 GN=TMEM65 PE=1 SV=2	28200.2	2	7.05509	-0.11885	26.4794	-1.10519	0.291807	0.999947	-4.60306	CA	no_hit
CUL2	A0A0A0MTN0|Q13617|Q13617-2	Cullin-2 OS=Homo sapiens OX=9606 GN=CUL2 PE=1 SV=1|Cullin-2 OS=Homo sapiens OX=9606 GN=CUL2 PE=1 SV=2|Isoform 2 of Cullin-2 OS=Homo sapiens OX=9606 GN=CUL2	107689.0|105806.0|108371.0	21	7.7565	-0.138202	29.7922	-1.10518	0.291812	0.999947	-4.60307	CA	no_hit
NOP2	P46087|P46087-2|P46087-4	Probable 28S rRNA (cytosine(4447)-C(5))-methyltransferase OS=Homo sapiens OX=9606 GN=NOP2 PE=1 SV=2|Isoform 2 of Probable 28S rRNA (cytosine(4447)-C(5))-methyltransferase OS=Homo sapiens OX=9606 GN=NOP2|Isoform 4 of Probable 28S rRNA (cytosine(4447)-C(5))-methyltransferase OS=Homo sapiens OX=9606 GN=NOP2|Probable 28S rRNA (cytosine(4447)-C(5))-methyltransferase OS=Homo sapiens OX=9606 GN=NOP2 PE=…	112405.0|112077.0|116322.0	34	8.32959	0.338113	31.7334	1.10476	0.291985	0.999947	-4.60323	CA	no_hit
NDUFS7	O75251	NADH dehydrogenase [ubiquinone] iron-sulfur protein 7, mitochondrial OS=Homo sapiens OX=9606 GN=NDUFS7 PE=1 SV=3	25962.7	5	7.96418	0.172351	28.4962	1.10413	0.292248	0.999947	-4.60348	CA	no_hit
EHD2	Q9NZN4	EH domain-containing protein 2 OS=Homo sapiens OX=9606 GN=EHD2 PE=1 SV=2	72853.6	19	8.09829	-0.121049	30.1669	-1.10406	0.292276	0.999947	-4.60351	CA	no_hit
TIMMDC1	Q9NPL8	Complex I assembly factor TIMMDC1, mitochondrial OS=Homo sapiens OX=9606 GN=TIMMDC1 PE=1 SV=2	37500.4	9	7.92002	-0.105858	28.5711	-1.10329	0.292598	0.999947	-4.60381	CA	no_hit
RFC4	P35249	Replication factor C subunit 4 OS=Homo sapiens OX=9606 GN=RFC4 PE=1 SV=2	50513.1	12	7.36112	0.130301	28.5788	1.10179	0.293223	0.999947	-4.6044	CA	no_hit
TAX1BP1	B8ZZD4|Q86VP1|Q86VP1-2|Q86VP1-4	Tax1-binding protein 1 OS=Homo sapiens OX=9606 GN=TAX1BP1 PE=1 SV=1|Tax1-binding protein 1 OS=Homo sapiens OX=9606 GN=TAX1BP1 PE=1 SV=2|Isoform 2 of Tax1-binding protein 1 OS=Homo sapiens OX=9606 GN=TAX1BP1|Isoform 4 of Tax1-binding protein 1 OS=Homo sapiens OX=9606 GN=TAX1BP1|Tax1-binding protein 1 OS=Homo sapiens OX=9606 GN=TAX1BP1 PE=1 SV=1	118971.0|115327.0|110292.0|90022.6	13	7.06768	0.0993144	28.7652	1.10149	0.293347	0.999947	-4.60452	CA	no_hit
ROCK2	O75116	Rho-associated protein kinase 2 OS=Homo sapiens OX=9606 GN=ROCK2 PE=1 SV=4	205745	52	7.81433	-0.128877	31.2818	-1.10142	0.293378	0.999947	-4.60455	CA	no_hit
AP1S1	A0A2R8YGH5|H7C1E4|P61966	AP complex subunit sigma OS=Homo sapiens OX=9606 GN=AP1S1 PE=1 SV=1|AP complex subunit sigma (Fragment) OS=Homo sapiens OX=9606 GN=AP1S1 PE=1 SV=1|AP-1 complex subunit sigma-1A OS=Homo sapiens OX=9606 GN=AP1S1 PE=1 SV=1	23076.6|27313.9|23207.6	3	7.29846	-0.121635	27.0167	-1.1008	0.293637	0.999947	-4.60479	CA	no_hit
ALDH1A1	P00352|Q5SYQ7	Retinal dehydrogenase 1 OS=Homo sapiens OX=9606 GN=ALDH1A1 PE=1 SV=2|Retinal dehydrogenase 1 (Fragment) OS=Homo sapiens OX=9606 GN=ALDH1A1 PE=1 SV=1	67014.1|26879.3	27	9.5135	-0.142824	33.3851	-1.10044	0.293785	0.999947	-4.60493	CA	no_hit
WBP11	Q9Y2W2	WW domain-binding protein 11 OS=Homo sapiens OX=9606 GN=WBP11 PE=1 SV=1	85164.3	17	7.71138	0.112568	29.709	1.1001	0.293926	0.999947	-4.60506	CA	no_hit
LMNA	P02545	Prelamin-A/C OS=Homo sapiens OX=9606 GN=LMNA PE=1 SV=1	86548.1	46	8.89635	0.349665	33.1235	1.1	0.293967	0.999947	-4.6051	CA	no_hit
DRG2	A8MZF9|P55039	Developmentally-regulated GTP-binding protein 2 OS=Homo sapiens OX=9606 GN=DRG2 PE=1 SV=1|Developmentally-regulated GTP-binding protein 2 OS=Homo sapiens OX=9606 GN=DRG2 PE=1 SV=1|Developmentally-regulated GTP-binding protein 2 OS=Homo sapiens OX=9606 GN=DRG2 PE=1 SV=1	47326.2|50854.2	13	7.6489	-0.118062	28.6114	-1.09913	0.29433	0.999947	-4.60544	CA	no_hit
ZC3H4	Q9UPT8	Zinc finger CCCH domain-containing protein 4 OS=Homo sapiens OX=9606 GN=ZC3H4 PE=1 SV=3	163308	10	7.16101	0.310548	28.0875	1.09903	0.294372	0.999947	-4.60548	CA	no_hit
MAEA	B4DQT1|B4DVN3|E7ESC7|Q7L5Y9|Q7L5Y9-2|Q7L5Y9-3	E3 ubiquitin-protein transferase MAEA OS=Homo sapiens OX=9606 GN=MAEA PE=1 SV=1|E3 ubiquitin-protein transferase MAEA OS=Homo sapiens OX=9606 GN=MAEA PE=1 SV=1|E3 ubiquitin-protein transferase MAEA OS=Homo sapiens OX=9606 GN=MAEA PE=1 SV=1|E3 ubiquitin-protein transferase MAEA OS=Homo sapiens OX=9606 GN=MAEA PE=1 SV=1|Isoform 2 of E3 ubiquitin-protein transferase MAEA OS=Homo sapiens OX=9606 GN=M…	48045.6|53999.6|60692.7|54764.3|49075.2|48558.9	5	7.06652	0.12567	27.6354	1.09892	0.294419	0.999947	-4.60553	CA	no_hit
MB21D2	Q8IYB1	Protein MB21D2 OS=Homo sapiens OX=9606 GN=MB21D2 PE=1 SV=3	66734.6	3	6.49254	-0.156451	24.3957	-1.09859	0.294558	0.999947	-4.60566	CA	no_hit
H4C1	P62805	Histone H4 OS=Homo sapiens OX=9606 GN=H4C1 PE=1 SV=2	14706.7	8	9.46856	0.193179	33.2285	1.09858	0.294562	0.999947	-4.60566	CA	no_hit
ZNHIT2	Q9UHR6	Zinc finger HIT domain-containing protein 2 OS=Homo sapiens OX=9606 GN=ZNHIT2 PE=1 SV=1	45366.3	5	6.76258	0.141911	26.1032	1.09825	0.294702	0.999947	-4.60579	CA	no_hit
HEBP2	Q9Y5Z4	Heme-binding protein 2 OS=Homo sapiens OX=9606 GN=HEBP2 PE=1 SV=1	26815.9	6	7.2992	-0.205976	27.8488	-1.09806	0.29478	0.999947	-4.60587	CA	no_hit
MRPL4	K7ES61|Q9BYD3	39S ribosomal protein L4, mitochondrial (Fragment) OS=Homo sapiens OX=9606 GN=MRPL4 PE=1 SV=1|39S ribosomal protein L4, mitochondrial OS=Homo sapiens OX=9606 GN=MRPL4 PE=1 SV=1|39S ribosomal protein L4, mitochondrial OS=Homo sapiens OX=9606 GN=MRPL4 PE=1 SV=1	37725.5|38909.1	7	7.63185	0.118869	27.4387	1.09804	0.294788	0.999947	-4.60587	CA	no_hit
PFKM	F8VTQ3|P08237	ATP-dependent 6-phosphofructokinase, muscle type (Fragment) OS=Homo sapiens OX=9606 GN=PFKM PE=1 SV=2|ATP-dependent 6-phosphofructokinase, muscle type OS=Homo sapiens OX=9606 GN=PFKM PE=1 SV=2|ATP-dependent 6-phosphofructokinase, muscle type OS=Homo sapiens OX=9606 GN=PFKM PE=1 SV=2	14035.5|99673.0	21	7.84922	-0.118214	30.3603	-1.09789	0.294849	0.999947	-4.60593	CA	no_hit
GATAD2B	A0A0U1RRM1|Q8WXI9	Transcriptional repressor p66-beta OS=Homo sapiens OX=9606 GN=GATAD2B PE=1 SV=1|Transcriptional repressor p66-beta OS=Homo sapiens OX=9606 GN=GATAD2B PE=1 SV=1	74715.7|76513.6	4	6.80942	0.261005	26.4791	1.09706	0.295199	0.999947	-4.60626	CA	no_hit
RPL28	P46779	60S ribosomal protein L28 OS=Homo sapiens OX=9606 GN=RPL28 PE=1 SV=3	20053.6	9	8.81511	0.245225	30.8997	1.09584	0.295711	0.999947	-4.60674	CA	no_hit
WASHC5	E7EQI7|Q12768	WASH complex subunit 5 OS=Homo sapiens OX=9606 GN=WASHC5 PE=1 SV=1|WASH complex subunit 5 OS=Homo sapiens OX=9606 GN=WASHC5 PE=1 SV=1|WASH complex subunit 5 OS=Homo sapiens OX=9606 GN=WASHC5 PE=1 SV=1	136897.0|156408.0	22	7.68602	-0.121039	29.5021	-1.09543	0.295883	0.999947	-4.6069	CA	no_hit
ZGPAT	Q8N5A5|Q8N5A5-2|Q8N5A5-3	Zinc finger CCCH-type with G patch domain-containing protein OS=Homo sapiens OX=9606 GN=ZGPAT PE=1 SV=3|Isoform 2 of Zinc finger CCCH-type with G patch domain-containing protein OS=Homo sapiens OX=9606 GN=ZGPAT|Isoform 3 of Zinc finger CCCH-type with G patch domain-containing protein OS=Homo sapiens OX=9606 GN=ZGPAT	65385.0|63470.1|62575.7	7	6.7606	0.105772	27.0665	1.09506	0.296037	0.999947	-4.60704	CA	no_hit
PBDC1	Q9BVG4	Protein PBDC1 OS=Homo sapiens OX=9606 GN=PBDC1 PE=1 SV=1	32847.3	9	7.51449	-0.162433	28.4794	-1.09491	0.296102	0.999947	-4.6071	CA	no_hit
KNTC1	P50748	Kinetochore-associated protein 1 OS=Homo sapiens OX=9606 GN=KNTC1 PE=1 SV=1	302797	29	7.2915	-0.129441	29.5013	-1.09434	0.29634	0.999947	-4.60732	CA	no_hit
PSMD6	Q15008	26S proteasome non-ATPase regulatory subunit 6 OS=Homo sapiens OX=9606 GN=PSMD6 PE=1 SV=1	53696.8	25	8.72748	-0.135848	30.8083	-1.09429	0.296362	0.999947	-4.60734	CA	no_hit
BIRC6	A0A3B3IUB9|Q9NR09	Baculoviral IAP repeat-containing protein 6 (Fragment) OS=Homo sapiens OX=9606 GN=BIRC6 PE=1 SV=1|Baculoviral IAP repeat-containing protein 6 OS=Homo sapiens OX=9606 GN=BIRC6 PE=1 SV=2|Baculoviral IAP repeat-containing protein 6 OS=Homo sapiens OX=9606 GN=BIRC6 PE=1 SV=2	475532.0|604943.0	52	7.51495	-0.106411	30.3809	-1.09284	0.29697	0.999947	-4.60791	CA	no_hit
TBC1D20	Q96BZ9|Q96BZ9-3	TBC1 domain family member 20 OS=Homo sapiens OX=9606 GN=TBC1D20 PE=1 SV=1|Isoform 3 of TBC1 domain family member 20 OS=Homo sapiens OX=9606 GN=TBC1D20	51168.4|53750.8	7	6.95134	-0.159086	26.5897	-1.09242	0.297148	0.999947	-4.60807	CA	no_hit
GCN1	Q92616	eIF-2-alpha kinase activator GCN1 OS=Homo sapiens OX=9606 GN=GCN1 PE=1 SV=6	343945	102	8.37629	-0.145869	32.7659	-1.09217	0.297251	0.999947	-4.60817	CA	no_hit
RPL21	P46778	60S ribosomal protein L21 OS=Homo sapiens OX=9606 GN=RPL21 PE=1 SV=2	25911.1	10	8.70609	0.214006	31.018	1.09191	0.297361	0.999947	-4.60827	CA	no_hit
RIN3	A0A087WWY9|Q8TB24	Ras and Rab interactor 3 OS=Homo sapiens OX=9606 GN=RIN3 PE=1 SV=1|Ras and Rab interactor 3 OS=Homo sapiens OX=9606 GN=RIN3 PE=1 SV=4	115330.0|123090.0	4	6.53866	-0.114164	24.8246	-1.09177	0.297423	0.999947	-4.60833	CA	no_hit
DIDO1	Q9BTC0	Death-inducer obliterator 1 OS=Homo sapiens OX=9606 GN=DIDO1 PE=1 SV=5	290457	29	7.33837	0.20302	29.5595	1.09155	0.297515	0.999947	-4.60841	CA	no_hit
PKD2	Q13563|Q13563-3	Polycystin-2 OS=Homo sapiens OX=9606 GN=PKD2 PE=1 SV=3|Isoform 3 of Polycystin-2 OS=Homo sapiens OX=9606 GN=PKD2	120706.0|113849.0	9	7.1127	0.101608	27.1057	1.09113	0.29769	0.999947	-4.60858	CA	no_hit
NECAP1	A0A1W2PR09|A0A1W2PRL5|A0A1W2PRM0|F5GYH1|Q8NC96	Adaptin ear-binding coat-associated protein 1 OS=Homo sapiens OX=9606 GN=NECAP1 PE=1 SV=1|Adaptin ear-binding coat-associated protein 1 OS=Homo sapiens OX=9606 GN=NECAP1 PE=1 SV=1|Adaptin ear-binding coat-associated protein 1 OS=Homo sapiens OX=9606 GN=NECAP1 PE=1 SV=1|Adaptin ear-binding coat-associated protein 1 (Fragment) OS=Homo sapiens OX=9606 GN=NECAP1 PE=1 SV=2|Adaptin ear-binding coat-ass…	34674.6|33558.0|32351.4|31217.9|35004.7	6	6.97234	-0.130504	26.901	-1.09089	0.297792	0.999947	-4.60867	CA	no_hit
ITGB5	P18084	Integrin beta-5 OS=Homo sapiens OX=9606 GN=ITGB5 PE=1 SV=1	102863	13	7.40224	0.115918	28.6222	1.0908	0.297832	0.999947	-4.60871	CA	no_hit
CORO2A	Q92828	Coronin-2A OS=Homo sapiens OX=9606 GN=CORO2A PE=1 SV=2	69364.7	3	6.69848	0.193546	26.219	1.09075	0.297852	0.999947	-4.60873	CA	no_hit
PHLDA1	Q8WV24|R4GND3	Pleckstrin homology-like domain family A member 1 OS=Homo sapiens OX=9606 GN=PHLDA1 PE=1 SV=4|Pleckstrin homology-like domain family A member 1 OS=Homo sapiens OX=9606 GN=PHLDA1 PE=1 SV=1	50977.0|35090.6	3	6.78632	0.143055	25.8193	1.08986	0.298226	0.999947	-4.60907	CA	no_hit
RAI1	A0A1W2PQJ7|Q7Z5J4|Q7Z5J4-2	Retinoic acid-induced protein 1 OS=Homo sapiens OX=9606 GN=RAI1 PE=1 SV=1|Retinoic acid-induced protein 1 OS=Homo sapiens OX=9606 GN=RAI1 PE=1 SV=2|Isoform 2 of Retinoic acid-induced protein 1 OS=Homo sapiens OX=9606 GN=RAI1	222363.0|247563.0|238613.0	9	6.75756	0.308166	27.7534	1.08984	0.298237	0.999947	-4.60908	CA	no_hit
ZCCHC8	Q6NZY4	Zinc finger CCHC domain-containing protein 8 OS=Homo sapiens OX=9606 GN=ZCCHC8 PE=1 SV=2	93149.3	13	6.99794	0.127422	28.1048	1.08909	0.298552	0.999947	-4.60937	CA	no_hit
HIKESHI	Q53FT3|E9PPG8	Protein Hikeshi OS=Homo sapiens OX=9606 GN=HIKESHI PE=1 SV=2|Protein Hikeshi OS=Homo sapiens OX=9606 GN=HIKESHI PE=1 SV=1|Protein Hikeshi OS=Homo sapiens OX=9606 GN=HIKESHI PE=1 SV=2	23800.2|23241.8	3	7.03982	-0.103912	26.0387	-1.0882	0.29893	0.999947	-4.60972	CA	no_hit
PTGR1	Q14914|F2Z3J9|Q14914-2	Prostaglandin reductase 1 OS=Homo sapiens OX=9606 GN=PTGR1 PE=1 SV=2|Prostaglandin reductase 1 OS=Homo sapiens OX=9606 GN=PTGR1 PE=1 SV=3|Prostaglandin reductase 1 OS=Homo sapiens OX=9606 GN=PTGR1 PE=1 SV=2|Isoform 2 of Prostaglandin reductase 1 OS=Homo sapiens OX=9606 GN=PTGR1	45505.2|40845.6|41315.8	16	9.10468	-0.14075	30.9013	-1.08805	0.298993	0.999947	-4.60978	CA	no_hit
HDLBP	A0A024R4E5	High density lipoprotein binding protein (Vigilin), isoform CRA_a OS=Homo sapiens OX=9606 GN=HDLBP PE=1 SV=1	175138	51	8.15755	-0.146629	31.9358	-1.08583	0.299933	0.999947	-4.61064	CA	no_hit
RBM34	P42696	RNA-binding protein 34 OS=Homo sapiens OX=9606 GN=RBM34 PE=1 SV=2	67205.8	17	7.35171	0.33305	29.734	1.08575	0.299966	0.999947	-4.61067	CA	no_hit
PRPSAP1	Q14558|Q14558-2	Phosphoribosyl pyrophosphate synthase-associated protein 1 OS=Homo sapiens OX=9606 GN=PRPSAP1 PE=1 SV=2|Isoform 2 of Phosphoribosyl pyrophosphate synthase-associated protein 1 OS=Homo sapiens OX=9606 GN=PRPSAP1	45737.9|49418.1	8	7.1322	-0.13095	27.5025	-1.08462	0.300446	0.999947	-4.61111	CA	no_hit
PRKAR1A	P10644	cAMP-dependent protein kinase type I-alpha regulatory subunit OS=Homo sapiens OX=9606 GN=PRKAR1A PE=1 SV=1	49875.6	14	7.8895	-0.124031	29.2162	-1.08452	0.300488	0.999947	-4.61115	CA	no_hit
EIF2A	Q9BY44	Eukaryotic translation initiation factor 2A OS=Homo sapiens OX=9606 GN=EIF2A PE=1 SV=3	82250.8	21	7.89384	-0.118831	30.4028	-1.08451	0.300492	0.999947	-4.61116	CA	no_hit
ELMO1	Q92556	Engulfment and cell motility protein 1 OS=Homo sapiens OX=9606 GN=ELMO1 PE=1 SV=2	100336	12	7.27163	-0.12886	28.2285	-1.08352	0.300914	0.999947	-4.61154	CA	no_hit
TBCD	J3KR97|Q9BTW9	Tubulin-specific chaperone D OS=Homo sapiens OX=9606 GN=TBCD PE=1 SV=1|Tubulin-specific chaperone D OS=Homo sapiens OX=9606 GN=TBCD PE=1 SV=2	151731.0|147668.0	18	7.62628	-0.117727	28.8146	-1.08332	0.300999	0.999947	-4.61162	CA	no_hit
ABCF3	Q9NUQ8|Q9NUQ8-2	ATP-binding cassette sub-family F member 3 OS=Homo sapiens OX=9606 GN=ABCF3 PE=1 SV=2|Isoform 2 of ATP-binding cassette sub-family F member 3 OS=Homo sapiens OX=9606 GN=ABCF3	90741.5|89981.1	18	7.38313	-0.116128	29.3516	-1.08322	0.30104	0.999947	-4.61166	CA	no_hit
MAPK14	B4E0K5|Q16539	Mitogen-activated protein kinase OS=Homo sapiens OX=9606 GN=MAPK14 PE=1 SV=1|Mitogen-activated protein kinase 14 OS=Homo sapiens OX=9606 GN=MAPK14 PE=1 SV=3	36462.0|47275.0	6	7.37508	-0.141061	27.3459	-1.08209	0.301523	0.999947	-4.6121	CA	no_hit
NELFA	A0A0C4DFX9|Q9H3P2	Negative elongation factor A OS=Homo sapiens OX=9606 GN=NELFA PE=1 SV=1|Negative elongation factor A OS=Homo sapiens OX=9606 GN=NELFA PE=1 SV=3	69642.0|68116.1	10	7.22968	0.0993674	28.0274	1.08185	0.301623	0.999947	-4.61219	CA	no_hit
RBM17	Q96I25	Splicing factor 45 OS=Homo sapiens OX=9606 GN=RBM17 PE=1 SV=1	56113.5	13	7.56933	0.179255	29.3445	1.08174	0.301673	0.999947	-4.61223	CA	no_hit
ADI1	Q9BV57	1,2-dihydroxy-3-keto-5-methylthiopentene dioxygenase OS=Homo sapiens OX=9606 GN=ADI1 PE=1 SV=1	25192.2	12	7.95478	-0.134939	28.4464	-1.08157	0.301744	0.999947	-4.6123	CA	no_hit
ANLN	Q9NQW6	Anillin OS=Homo sapiens OX=9606 GN=ANLN PE=1 SV=2	153477	24	7.36714	0.0924199	29.7628	1.08137	0.30183	0.999947	-4.61238	CA	no_hit
UBE2C	A0A087WVK1|O00762|O00762-3|O00762-4	Ubiquitin-conjugating enzyme E2 C OS=Homo sapiens OX=9606 GN=UBE2C PE=1 SV=1|Ubiquitin-conjugating enzyme E2 C OS=Homo sapiens OX=9606 GN=UBE2C PE=1 SV=1|Isoform 3 of Ubiquitin-conjugating enzyme E2 C OS=Homo sapiens OX=9606 GN=UBE2C|Isoform 4 of Ubiquitin-conjugating enzyme E2 C OS=Homo sapiens OX=9606 GN=UBE2C|Ubiquitin-conjugating enzyme E2 C OS=Homo sapiens OX=9606 GN=UBE2C PE=1 SV=1	16573.8|23404.4|19821.6|20156.7	4	7.16568	0.193899	26.6278	1.08131	0.301855	0.999947	-4.6124	CA	no_hit
CD81	A6NMH8|E9PIF1|E9PJK1|E9PRJ8|H0YDJ9|H0YDL9|P60033	Tetraspanin OS=Homo sapiens OX=9606 GN=CD81 PE=1 SV=1|Tetraspanin OS=Homo sapiens OX=9606 GN=CD81 PE=1 SV=1|Tetraspanin OS=Homo sapiens OX=9606 GN=CD81 PE=1 SV=1|Tetraspanin (Fragment) OS=Homo sapiens OX=9606 GN=CD81 PE=1 SV=1|Tetraspanin (Fragment) OS=Homo sapiens OX=9606 GN=CD81 PE=1 SV=1|Tetraspanin (Fragment) OS=Homo sapiens OX=9606 GN=CD81 PE=1 SV=1|CD81 antigen OS=Homo sapiens OX=9606 GN=CD…	34482.0|29783.2|21259.0|26608.2|28035.7|27448.4|30126.9	2	7.18386	-0.224113	26.476	-1.0807	0.302113	0.999947	-4.61264	CA	no_hit
COPG1	Q9Y678	Coatomer subunit gamma-1 OS=Homo sapiens OX=9606 GN=COPG1 PE=1 SV=1	115394	28	8.51537	-0.126736	30.7974	-1.08063	0.302145	0.999947	-4.61266	CA	no_hit
PTER	Q96BW5|Q96BW5-2	Phosphotriesterase-related protein OS=Homo sapiens OX=9606 GN=PTER PE=1 SV=1|Isoform 2 of Phosphotriesterase-related protein OS=Homo sapiens OX=9606 GN=PTER	45894.6|39346.1	7	7.50405	-0.11996	28.1474	-1.08038	0.302251	0.999947	-4.61276	CA	no_hit
IGF2R	P11717	Cation-independent mannose-6-phosphate receptor OS=Homo sapiens OX=9606 GN=IGF2R PE=1 SV=3	324657	39	7.51711	0.151985	30.4996	1.08027	0.302297	0.999947	-4.6128	CA	no_hit
CCNT1	O60563	Cyclin-T1 OS=Homo sapiens OX=9606 GN=CCNT1 PE=1 SV=1	96852.4	8	7.36721	0.234293	28.471	1.07938	0.302676	0.999947	-4.61315	CA	no_hit
GYG1	P46976|P46976-2	Glycogenin-1 OS=Homo sapiens OX=9606 GN=GYG1 PE=1 SV=4|Isoform GN-1 of Glycogenin-1 OS=Homo sapiens OX=9606 GN=GYG1	45176.5|42854.3	7	7.70885	-0.130664	28.3398	-1.07903	0.302827	0.999947	-4.61328	CA	no_hit
OTUD7B	Q5SZ59|Q6GQQ9|Q6GQQ9-2	OTU domain containing 7B (Fragment) OS=Homo sapiens OX=9606 GN=OTUD7B PE=1 SV=1|OTU domain-containing protein 7B OS=Homo sapiens OX=9606 GN=OTUD7B PE=1 SV=1|Isoform 2 of OTU domain-containing protein 7B OS=Homo sapiens OX=9606 GN=OTUD7B|OTU domain-containing protein 7B OS=Homo sapiens OX=9606 GN=OTUD7B PE=1 SV=1|Isoform 2 of OTU domain-containing protein 7B OS=Homo sapiens OX=9606 GN=OTUD7B	52664.3|108363.0|104558.0	4	6.72949	0.176532	25.7106	1.07903	0.302828	0.999947	-4.61328	CA	no_hit
RHBDD1	B9A054|Q8TEB9|Q8TEB9-2	Rhomboid-related protein 4 OS=Homo sapiens OX=9606 GN=RHBDD1 PE=1 SV=1|Rhomboid-related protein 4 OS=Homo sapiens OX=9606 GN=RHBDD1 PE=1 SV=1|Isoform 2 of Rhomboid-related protein 4 OS=Homo sapiens OX=9606 GN=RHBDD1|Rhomboid-related protein 4 OS=Homo sapiens OX=9606 GN=RHBDD1 PE=1 SV=1|Isoform 2 of Rhomboid-related protein 4 OS=Homo sapiens OX=9606 GN=RHBDD1	20415.6|38575.7|12947.2	3	6.55506	-0.109255	25.4944	-1.07871	0.302963	0.999947	-4.61341	CA	no_hit
KRR1	Q13601|Q13601-2	KRR1 small subunit processome component homolog OS=Homo sapiens OX=9606 GN=KRR1 PE=1 SV=4|Isoform 2 of KRR1 small subunit processome component homolog OS=Homo sapiens OX=9606 GN=KRR1	62422.4|52203.4	8	7.63403	0.258324	29.7812	1.07853	0.303041	0.999947	-4.61348	CA	no_hit
AK6	A0A087WVD7|Q9Y3D8|Q9Y3D8-2	Adenylate kinase isoenzyme 6 OS=Homo sapiens OX=9606 GN=AK6 PE=1 SV=1|Adenylate kinase isoenzyme 6 OS=Homo sapiens OX=9606 GN=AK6 PE=1 SV=1|Isoform 2 of Adenylate kinase isoenzyme 6 OS=Homo sapiens OX=9606 GN=AK6	13868.1|23262.0|23367.0	4	7.02919	0.18113	26.6924	1.07667	0.303837	0.999947	-4.6142	CA	no_hit
TMEM209	Q96SK2|Q96SK2-2	Transmembrane protein 209 OS=Homo sapiens OX=9606 GN=TMEM209 PE=1 SV=2|Isoform 2 of Transmembrane protein 209 OS=Homo sapiens OX=9606 GN=TMEM209	71494.2|71363.2	5	7.09295	0.154964	27.5261	1.07575	0.304231	0.999947	-4.61455	CA	no_hit
EDC3	Q96F86	Enhancer of mRNA-decapping protein 3 OS=Homo sapiens OX=9606 GN=EDC3 PE=1 SV=1	64997.2	8	7.12678	0.102106	27.8215	1.07539	0.304386	0.999947	-4.61469	CA	no_hit
DFFA	O00273|O00273-2	DNA fragmentation factor subunit alpha OS=Homo sapiens OX=9606 GN=DFFA PE=1 SV=1|Isoform DFF35 of DNA fragmentation factor subunit alpha OS=Homo sapiens OX=9606 GN=DFFA	42678.6|33689.5	11	7.43394	-0.129505	28.5316	-1.07537	0.304392	0.999947	-4.6147	CA	no_hit
PPHLN1	F8W0Q9|Q8NEY8-2|Q8NEY8-8|Q8NEY8-9	Periphilin-1 OS=Homo sapiens OX=9606 GN=PPHLN1 PE=1 SV=1|Isoform 2 of Periphilin-1 OS=Homo sapiens OX=9606 GN=PPHLN1|Isoform 8 of Periphilin-1 OS=Homo sapiens OX=9606 GN=PPHLN1|Isoform 9 of Periphilin-1 OS=Homo sapiens OX=9606 GN=PPHLN1	51766.7|50481.9|49560.5|46797.0	7	7.12775	0.281899	28.792	1.07471	0.304675	0.999947	-4.61495	CA	no_hit
GSDMD	G3V1A6|P57764	Gasdermin domain containing 1, isoform CRA_d OS=Homo sapiens OX=9606 GN=GSDMD PE=1 SV=1|Gasdermin-D OS=Homo sapiens OX=9606 GN=GSDMD PE=1 SV=1	62831.7|57844.1	6	7.14813	-0.13172	27.6269	-1.07459	0.30473	0.999947	-4.615	CA	no_hit
PCM1	A0A5H1ZRS1	Pericentriolar material 1 protein OS=Homo sapiens OX=9606 GN=PCM1 PE=1 SV=1	268791	40	7.57115	0.177362	30.9849	1.07455	0.304747	0.999947	-4.61502	CA	no_hit
EPS8	A0A2R8Y4W2|A0A2R8YE63|Q12929	Epidermal growth factor receptor kinase substrate 8 OS=Homo sapiens OX=9606 GN=EPS8 PE=1 SV=1|Epidermal growth factor receptor kinase substrate 8 OS=Homo sapiens OX=9606 GN=EPS8 PE=1 SV=1|Epidermal growth factor receptor kinase substrate 8 OS=Homo sapiens OX=9606 GN=EPS8 PE=1 SV=1	109767.0|112009.0|108898.0	18	7.13047	0.18792	28.4236	1.0745	0.304767	0.999947	-4.61504	CA	no_hit
BRD2	A0A0G2JK44|A0A140T9E9|H0Y6K2|P25440|P25440-2|P25440-3|P25440-4	Bromodomain-containing protein 2 OS=Homo sapiens OX=9606 GN=BRD2 PE=1 SV=1|Bromodomain-containing protein 2 (Fragment) OS=Homo sapiens OX=9606 GN=BRD2 PE=1 SV=1|Bromodomain-containing protein 2 (Fragment) OS=Homo sapiens OX=9606 GN=BRD2 PE=1 SV=1|Bromodomain-containing protein 2 OS=Homo sapiens OX=9606 GN=BRD2 PE=1 SV=2|Isoform 2 of Bromodomain-containing protein 2 OS=Homo sapiens OX=9606 GN=BRD2…	117601.0|113305.0|113271.0|113236.0|117568.0|107417.0|96719.0	5	6.96107	0.196254	27.5152	1.0741	0.304939	0.999947	-4.61519	CA	no_hit
CAP2	P40123	Adenylyl cyclase-associated protein 2 OS=Homo sapiens OX=9606 GN=CAP2 PE=1 SV=1	62810.6	14	7.65266	-0.113799	29.2869	-1.0741	0.30494	0.999947	-4.61519	CA	no_hit
SPCS1	A0A5F9YFS9	Signal peptidase complex subunit 1 OS=Homo sapiens OX=9606 GN=SPCS1 PE=1 SV=1	14287.8	2	7.59239	0.105702	26.504	1.07297	0.305426	0.999947	-4.61563	CA	no_hit
RWDD1	Q9H446	RWD domain-containing protein 1 OS=Homo sapiens OX=9606 GN=RWDD1 PE=1 SV=1	33702.3	3	7.23054	-0.141036	27.1307	-1.07287	0.305469	0.999947	-4.61567	CA	no_hit
CISD1	Q9NZ45	CDGSH iron-sulfur domain-containing protein 1 OS=Homo sapiens OX=9606 GN=CISD1 PE=1 SV=1	16012.8	3	7.63094	0.172759	27.596	1.07149	0.306061	0.999947	-4.6162	CA	no_hit
CCDC124	Q96CT7	Coiled-coil domain-containing protein 124 OS=Homo sapiens OX=9606 GN=CCDC124 PE=1 SV=1	33728.9	12	7.71821	0.23121	29.2744	1.07112	0.306221	0.999947	-4.61634	CA	no_hit
MUL1	Q969V5	Mitochondrial ubiquitin ligase activator of NFKB 1 OS=Homo sapiens OX=9606 GN=MUL1 PE=1 SV=1	47569.6	8	7.10762	0.0999487	27.7753	1.07061	0.30644	0.999947	-4.61654	CA	no_hit
SPAG9	O60271|O60271-4|O60271-9	C-Jun-amino-terminal kinase-interacting protein 4 OS=Homo sapiens OX=9606 GN=SPAG9 PE=1 SV=4|Isoform 4 of C-Jun-amino-terminal kinase-interacting protein 4 OS=Homo sapiens OX=9606 GN=SPAG9|Isoform 6 of C-Jun-amino-terminal kinase-interacting protein 4 OS=Homo sapiens OX=9606 GN=SPAG9|C-Jun-amino-terminal kinase-interacting protein 4 OS=Homo sapiens OX=9606 GN=SPAG9 PE=1 SV=4|Isoform 4 of C-Jun-am…	173379.0|171552.0|152198.0	40	7.92848	-0.101562	30.7915	-1.07059	0.306447	0.999947	-4.61654	CA	no_hit
ADA	P00813	Adenosine deaminase OS=Homo sapiens OX=9606 GN=ADA PE=1 SV=3	48324.7	10	7.5019	-0.168334	28.3946	-1.07056	0.306463	0.999947	-4.61656	CA	no_hit
AARS1	P49588	Alanine--tRNA ligase, cytoplasmic OS=Homo sapiens OX=9606 GN=AARS1 PE=1 SV=2	127562	41	8.42519	-0.125579	31.9427	-1.07006	0.306676	0.999947	-4.61675	CA	no_hit
AKR1C3	P42330|P42330-2	Aldo-keto reductase family 1 member C3 OS=Homo sapiens OX=9606 GN=AKR1C3 PE=1 SV=4|Isoform 2 of Aldo-keto reductase family 1 member C3 OS=Homo sapiens OX=9606 GN=AKR1C3	45138.4|28862.5	18	8.94154	-0.146145	30.9953	-1.06968	0.306839	0.999947	-4.61689	CA	no_hit
DEPDC7	Q96QD5|Q96QD5-2	DEP domain-containing protein 7 OS=Homo sapiens OX=9606 GN=DEPDC7 PE=2 SV=1|Isoform 2 of DEP domain-containing protein 7 OS=Homo sapiens OX=9606 GN=DEPDC7	71696.3|71149.9	6	6.47091	0.191544	25.3903	1.06949	0.306925	0.999947	-4.61697	CA	no_hit
UBR2	Q8IWV8|Q8IWV8-4	E3 ubiquitin-protein ligase UBR2 OS=Homo sapiens OX=9606 GN=UBR2 PE=1 SV=1|Isoform 4 of E3 ubiquitin-protein ligase UBR2 OS=Homo sapiens OX=9606 GN=UBR2	231512.0|231514.0	14	6.9391	-0.114959	28.1375	-1.06946	0.306938	0.999947	-4.61698	CA	no_hit
MED16	Q9Y2X0|Q9Y2X0-2|Q9Y2X0-3|Q9Y2X0-4|Q9Y2X0-5|U3KQ43	Mediator of RNA polymerase II transcription subunit 16 OS=Homo sapiens OX=9606 GN=MED16 PE=1 SV=2|Isoform 2 of Mediator of RNA polymerase II transcription subunit 16 OS=Homo sapiens OX=9606 GN=MED16|Isoform 3 of Mediator of RNA polymerase II transcription subunit 16 OS=Homo sapiens OX=9606 GN=MED16|Mediator of RNA polymerase II transcription subunit 16 OS=Homo sapiens OX=9606 GN=MED16 PE=1 SV=2|I…	110305.0|106544.0|108563.0|93209.9|83491.0|83418.0	7	6.89325	0.169875	27.9712	1.06867	0.307278	0.999947	-4.61728	CA	no_hit
NGDN	H0YJ17|Q8NEJ9|Q8NEJ9-2	Neuroguidin (Fragment) OS=Homo sapiens OX=9606 GN=NGDN PE=1 SV=1|Neuroguidin OS=Homo sapiens OX=9606 GN=NGDN PE=1 SV=1|Isoform 2 of Neuroguidin OS=Homo sapiens OX=9606 GN=NGDN|Neuroguidin OS=Homo sapiens OX=9606 GN=NGDN PE=1 SV=1|Isoform 2 of Neuroguidin OS=Homo sapiens OX=9606 GN=NGDN	37949.1|45910.9|45267.4	7	6.50976	0.279289	26.3679	1.06862	0.3073	0.999947	-4.6173	CA	no_hit
CSNK2A1	A0A2R8YD58|E7EU96|P68400	Casein kinase II subunit alpha OS=Homo sapiens OX=9606 GN=CSNK2A1 PE=1 SV=1|Casein kinase II subunit alpha OS=Homo sapiens OX=9606 GN=CSNK2A1 PE=1 SV=1|Casein kinase II subunit alpha OS=Homo sapiens OX=9606 GN=CSNK2A1 PE=1 SV=1	51558.1|53058.1|52225.6	15	8.13321	0.140912	30.435	1.06745	0.307807	0.999947	-4.61775	CA	no_hit
CCNK	O75909|O75909-4	Cyclin-K OS=Homo sapiens OX=9606 GN=CCNK PE=1 SV=2|Isoform 4 of Cyclin-K OS=Homo sapiens OX=9606 GN=CCNK|Isoform 4 of Cyclin-K OS=Homo sapiens OX=9606 GN=CCNK	74636.7|76836.9	6	7.15439	0.150516	27.8202	1.0669	0.308043	0.999947	-4.61796	CA	no_hit
NDUFB1	O75438	NADH dehydrogenase [ubiquinone] 1 beta subcomplex subunit 1 OS=Homo sapiens OX=9606 GN=NDUFB1 PE=1 SV=1	8230.49	3	7.65979	-0.136563	27.2877	-1.06557	0.308619	0.999947	-4.61848	CA	no_hit
EEF1AKNMT	Q8N6R0	eEF1A lysine and N-terminal methyltransferase OS=Homo sapiens OX=9606 GN=EEF1AKNMT PE=1 SV=1	92045.3	14	7.18285	-0.115334	27.5841	-1.06534	0.308719	0.999947	-4.61856	CA	no_hit
MPST	P25325|P25325-2	3-mercaptopyruvate sulfurtransferase OS=Homo sapiens OX=9606 GN=MPST PE=1 SV=3|Isoform 2 of 3-mercaptopyruvate sulfurtransferase OS=Homo sapiens OX=9606 GN=MPST	36484.8|38554.8	10	8.00174	0.105137	29.1247	1.06387	0.309356	0.999947	-4.61913	CA	no_hit
PPCS	Q9HAB8	Phosphopantothenate--cysteine ligase OS=Homo sapiens OX=9606 GN=PPCS PE=1 SV=2	37634.3	7	7.65653	-0.129052	28.2091	-1.06351	0.309512	0.999947	-4.61927	CA	no_hit
FDX1	P10109	Adrenodoxin, mitochondrial OS=Homo sapiens OX=9606 GN=FDX1 PE=1 SV=1	21491	5	7.45058	-0.15139	28.109	-1.06349	0.30952	0.999947	-4.61927	CA	no_hit
CCDC86	Q9H6F5	Coiled-coil domain-containing protein 86 OS=Homo sapiens OX=9606 GN=CCDC86 PE=1 SV=1	50972.6	11	7.33985	0.240724	29.5746	1.06327	0.309618	0.999947	-4.61936	CA	no_hit
TRAF3IP2	O43734|O43734-2|O43734-5	Adapter protein CIKS OS=Homo sapiens OX=9606 GN=TRAF3IP2 PE=1 SV=3|Isoform 2 of Adapter protein CIKS OS=Homo sapiens OX=9606 GN=TRAF3IP2|Isoform 5 of Adapter protein CIKS OS=Homo sapiens OX=9606 GN=TRAF3IP2	71165.7|70085.2|69652.9	2	6.07578	0.346337	25.2023	1.06277	0.309833	0.999947	-4.61955	CA	no_hit
PLEKHA7	E9PKC0|A0A1B0GTN9|Q6IQ23|Q6IQ23-2	Pleckstrin homology domain-containing family A member 7 OS=Homo sapiens OX=9606 GN=PLEKHA7 PE=1 SV=1|Pleckstrin homology domain-containing family A member 7 (Fragment) OS=Homo sapiens OX=9606 GN=PLEKHA7 PE=1 SV=1|Pleckstrin homology domain-containing family A member 7 OS=Homo sapiens OX=9606 GN=PLEKHA7 PE=1 SV=1|Pleckstrin homology domain-containing family A member 7 OS=Homo sapiens OX=9606 GN=PL…	165287.0|155130.0|144966.0|145094.0	6	6.58732	0.200131	25.6649	1.06269	0.309868	0.999947	-4.61958	CA	no_hit
NUBP2	Q9Y5Y2	Cytosolic Fe-S cluster assembly factor NUBP2 OS=Homo sapiens OX=9606 GN=NUBP2 PE=1 SV=1	32248.1	8	7.6901	-0.119937	27.5422	-1.06228	0.310047	0.999947	-4.61974	CA	no_hit
DNAJC11	Q9NVH1|Q9NVH1-3	DnaJ homolog subfamily C member 11 OS=Homo sapiens OX=9606 GN=DNAJC11 PE=1 SV=2|Isoform 3 of DnaJ homolog subfamily C member 11 OS=Homo sapiens OX=9606 GN=DNAJC11	73562.7|66572.8	14	7.66759	0.172377	29.2008	1.06211	0.310122	0.999947	-4.6198	CA	no_hit
GTF2F1	P35269	General transcription factor IIF subunit 1 OS=Homo sapiens OX=9606 GN=GTF2F1 PE=1 SV=2	76818.7	11	7.53995	0.125649	28.8361	1.06184	0.31024	0.999947	-4.61991	CA	no_hit
SELENBP1	Q13228|Q13228-4	Methanethiol oxidase OS=Homo sapiens OX=9606 GN=SELENBP1 PE=1 SV=2|Isoform 4 of Methanethiol oxidase OS=Homo sapiens OX=9606 GN=SELENBP1	61445.6|65974.9	16	7.63143	-0.106041	28.3856	-1.06075	0.310711	0.999947	-4.62032	CA	no_hit
VPS51	E9PJ36|Q9UID3|Q9UID3-2	Vacuolar protein sorting-associated protein 51 homolog (Fragment) OS=Homo sapiens OX=9606 GN=VPS51 PE=1 SV=1|Vacuolar protein sorting-associated protein 51 homolog OS=Homo sapiens OX=9606 GN=VPS51 PE=1 SV=2|Vacuolar protein sorting-associated protein 51 homolog OS=Homo sapiens OX=9606 GN=VPS51 PE=1 SV=2|Isoform 2 of Vacuolar protein sorting-associated protein 51 homolog OS=Homo sapiens OX=9606 GN…	31413.3|94810.0|79853.4	9	7.40892	-0.121107	27.8157	-1.06072	0.310727	0.999947	-4.62034	CA	no_hit
UNC13D	Q70J99|Q70J99-3	Protein unc-13 homolog D OS=Homo sapiens OX=9606 GN=UNC13D PE=1 SV=1|Isoform 3 of Protein unc-13 homolog D OS=Homo sapiens OX=9606 GN=UNC13D	137065.0|143264.0	13	7.08193	-0.121722	27.4904	-1.06055	0.310801	0.999947	-4.6204	CA	no_hit
GPD1L	Q8N335	Glycerol-3-phosphate dehydrogenase 1-like protein OS=Homo sapiens OX=9606 GN=GPD1L PE=1 SV=1	46930.6	14	7.75925	-0.123588	29.2966	-1.06042	0.310858	0.999947	-4.62045	CA	no_hit
SIN3A	Q96ST3	Paired amphipathic helix protein Sin3a OS=Homo sapiens OX=9606 GN=SIN3A PE=1 SV=2	172349	19	7.3869	0.161248	29.9442	1.06016	0.310972	0.999947	-4.62055	CA	no_hit
RTL8C	A6ZKI3	Retrotransposon Gag-like protein 8C OS=Homo sapiens OX=9606 GN=RTL8C PE=1 SV=1	14683.8	3	6.83669	-0.15678	25.9056	-1.0581	0.311869	0.999947	-4.62134	CA	no_hit
CPNE2	Q96FN4	Copine-2 OS=Homo sapiens OX=9606 GN=CPNE2 PE=1 SV=3	71873.7	6	6.75267	0.240984	27.5666	1.05728	0.312227	0.999947	-4.62165	CA	no_hit
NXN	Q6DKJ4	Nucleoredoxin OS=Homo sapiens OX=9606 GN=NXN PE=1 SV=2	54844.9	7	6.98573	-0.111235	26.7106	-1.05709	0.312308	0.999947	-4.62172	CA	no_hit
TCF25	Q9BQ70	Transcription factor 25 OS=Homo sapiens OX=9606 GN=TCF25 PE=1 SV=1	85763.7	9	7.22175	0.211338	28.0353	1.05702	0.312339	0.999947	-4.62175	CA	no_hit
PPM1G	O15355	Protein phosphatase 1G OS=Homo sapiens OX=9606 GN=PPM1G PE=1 SV=1	70566.2	20	8.17958	-0.127674	30.2785	-1.05699	0.312351	0.999947	-4.62176	CA	no_hit
BAIAP2L1	Q9UHR4	Brain-specific angiogenesis inhibitor 1-associated protein 2-like protein 1 OS=Homo sapiens OX=9606 GN=BAIAP2L1 PE=1 SV=2	70574.3	19	7.80103	0.121034	29.9649	1.05624	0.31268	0.999947	-4.62205	CA	no_hit
CEP170B	J3KQR7|Q9Y4F5|Q9Y4F5-2	Centrosomal protein of 170 kDa protein B OS=Homo sapiens OX=9606 GN=CEP170B PE=1 SV=1|Centrosomal protein of 170 kDa protein B OS=Homo sapiens OX=9606 GN=CEP170B PE=1 SV=4|Isoform 2 of Centrosomal protein of 170 kDa protein B OS=Homo sapiens OX=9606 GN=CEP170B	189869.0|189798.0|185522.0	8	6.29505	0.178479	25.4409	1.05597	0.312798	0.999947	-4.62215	CA	no_hit
NOP16	Q9Y3C1	Nucleolar protein 16 OS=Homo sapiens OX=9606 GN=NOP16 PE=1 SV=2	27620.5	6	7.65277	0.201331	29.5502	1.05565	0.312937	0.999947	-4.62227	CA	no_hit
TSPYL5	Q86VY4	Testis-specific Y-encoded-like protein 5 OS=Homo sapiens OX=9606 GN=TSPYL5 PE=1 SV=2	52645	4	6.65179	0.210789	26.834	1.05544	0.313031	0.999947	-4.62235	CA	no_hit
LSM2	Q9Y333	U6 snRNA-associated Sm-like protein LSm2 OS=Homo sapiens OX=9606 GN=LSM2 PE=1 SV=1	13375.3	4	7.04145	-0.113278	27.6262	-1.05535	0.313073	0.999947	-4.62239	CA	no_hit
TBC1D24	A0A2R8Y518|H3BV07|Q9ULP9|Q9ULP9-2	TBC1 domain family member 24 (Fragment) OS=Homo sapiens OX=9606 GN=TBC1D24 PE=1 SV=1|TBC1 domain family member 24 (Fragment) OS=Homo sapiens OX=9606 GN=TBC1D24 PE=1 SV=9|TBC1 domain family member 24 OS=Homo sapiens OX=9606 GN=TBC1D24 PE=1 SV=2|Isoform 2 of TBC1 domain family member 24 OS=Homo sapiens OX=9606 GN=TBC1D24	62987.8|62322.6|73754.0|72848.4	7	6.96439	-0.128341	26.971	-1.0548	0.313311	0.999947	-4.6226	CA	no_hit
TMED4	Q7Z7H5	Transmembrane emp24 domain-containing protein 4 OS=Homo sapiens OX=9606 GN=TMED4 PE=1 SV=1	29747.9	8	7.915	0.128773	28.7498	1.05471	0.31335	0.999947	-4.62263	CA	no_hit
HAUS4	G3V541|Q9H6D7|Q9H6D7-4	HAUS augmin-like complex subunit 4 (Fragment) OS=Homo sapiens OX=9606 GN=HAUS4 PE=1 SV=1|HAUS augmin-like complex subunit 4 OS=Homo sapiens OX=9606 GN=HAUS4 PE=1 SV=1|HAUS augmin-like complex subunit 4 (Fragment) OS=Homo sapiens OX=9606 GN=HAUS4 PE=1 SV=1|HAUS augmin-like complex subunit 4 OS=Homo sapiens OX=9606 GN=HAUS4 PE=1 SV=1|Isoform 4 of HAUS augmin-like complex subunit 4 OS=Homo sapiens O…	39677.7|51651.2|46169.2	3	6.55546	0.154666	25.7294	1.0543	0.313531	0.999947	-4.62279	CA	no_hit
LCLAT1	Q6UWP7|Q6UWP7-3	Lysocardiolipin acyltransferase 1 OS=Homo sapiens OX=9606 GN=LCLAT1 PE=1 SV=1|Isoform 3 of Lysocardiolipin acyltransferase 1 OS=Homo sapiens OX=9606 GN=LCLAT1	56949.6|51928.0	9	7.98522	-0.144382	28.9124	-1.05421	0.31357	0.999947	-4.62282	CA	no_hit
MADD	A0A0A0MRB5|Q8WXG6|Q8WXG6-2|Q8WXG6-3|Q8WXG6-4|Q8WXG6-5|Q8WXG6-8|Q8WXG6-6|Q8WXG6-7	MAP kinase-activating death domain protein OS=Homo sapiens OX=9606 GN=MADD PE=1 SV=1|MAP kinase-activating death domain protein OS=Homo sapiens OX=9606 GN=MADD PE=1 SV=2|Isoform 2 of MAP kinase-activating death domain protein OS=Homo sapiens OX=9606 GN=MADD|Isoform 3 of MAP kinase-activating death domain protein OS=Homo sapiens OX=9606 GN=MADD|Isoform 4 of MAP kinase-activating death domain prote…	203005.0|211574.0|205006.0|202905.0|199847.0|197845.0|197459.0|189684.0|203413.0	4	6.59919	-0.139653	25.4708	-1.05291	0.31414	0.999947	-4.62332	CA	no_hit
ACTR1A	P61163	Alpha-centractin OS=Homo sapiens OX=9606 GN=ACTR1A PE=1 SV=1	49697.7	10	8.07418	-0.125741	29.4225	-1.05245	0.314343	0.999947	-4.62349	CA	no_hit
TMED8	Q6PL24	Protein TMED8 OS=Homo sapiens OX=9606 GN=TMED8 PE=1 SV=1	40813.8	5	7.21806	-0.132853	27.6248	-1.05231	0.314406	0.999947	-4.62355	CA	no_hit
RPS24	A0A2R8Y849|A0A2R8YD14|E7ETK0|P62847|P62847-2|P62847-3|P62847-4	40S ribosomal protein S24 OS=Homo sapiens OX=9606 GN=RPS24 PE=1 SV=1|40S ribosomal protein S24 OS=Homo sapiens OX=9606 GN=RPS24 PE=1 SV=1|40S ribosomal protein S24 OS=Homo sapiens OX=9606 GN=RPS24 PE=1 SV=1|40S ribosomal protein S24 OS=Homo sapiens OX=9606 GN=RPS24 PE=1 SV=1|Isoform 2 of 40S ribosomal protein S24 OS=Homo sapiens OX=9606 GN=RPS24|Isoform 3 of 40S ribosomal protein S24 OS=Homo sapi…	22184.1|26413.2|21879.9|22410.2|21751.8|22616.4|41079.7	6	8.60552	0.20058	30.6996	1.05209	0.314503	0.999947	-4.62363	CA	no_hit
CZIB	Q9NWV4	CXXC motif containing zinc binding protein OS=Homo sapiens OX=9606 GN=CZIB PE=1 SV=1	22333.6	7	7.3509	-0.129343	27.8589	-1.05203	0.314529	0.999947	-4.62365	CA	no_hit
EXOC3	O60645	Exocyst complex component 3 OS=Homo sapiens OX=9606 GN=EXOC3 PE=1 SV=3	101788	11	7.18893	-0.144962	28.1715	-1.05089	0.315029	0.999947	-4.62409	CA	no_hit
USP33	Q8TEY7|Q8TEY7-2|Q8TEY7-3	Ubiquitin carboxyl-terminal hydrolase 33 OS=Homo sapiens OX=9606 GN=USP33 PE=1 SV=2|Isoform 2 of Ubiquitin carboxyl-terminal hydrolase 33 OS=Homo sapiens OX=9606 GN=USP33|Isoform 3 of Ubiquitin carboxyl-terminal hydrolase 33 OS=Homo sapiens OX=9606 GN=USP33	127705.0|123047.0|113556.0	4	6.42202	0.0890977	25.4233	1.05031	0.315284	0.999947	-4.62431	CA	no_hit
SAR1A	Q9NR31	GTP-binding protein SAR1a OS=Homo sapiens OX=9606 GN=SAR1A PE=1 SV=1	26117.1	4	8.0523	-0.130682	28.159	-1.0495	0.31564	0.999947	-4.62461	CA	no_hit
NF2	P35240	Merlin OS=Homo sapiens OX=9606 GN=NF2 PE=1 SV=1	88126.5	10	7.19367	-0.10162	27.9891	-1.04944	0.315669	0.999947	-4.62464	CA	no_hit
PPP2R2A	P63151	Serine/threonine-protein phosphatase 2A 55 kDa regulatory subunit B alpha isoform OS=Homo sapiens OX=9606 GN=PPP2R2A PE=1 SV=1	61298.9	8	7.7891	-0.117521	28.7289	-1.0486	0.316036	0.999947	-4.62495	CA	no_hit
TXNL4B	Q9NX01	Thioredoxin-like protein 4B OS=Homo sapiens OX=9606 GN=TXNL4B PE=1 SV=1	21319.7	4	6.6715	-0.118822	25.7782	-1.04833	0.316159	0.999947	-4.62506	CA	no_hit
SH3BGRL	O75368	SH3 domain-binding glutamic acid-rich-like protein OS=Homo sapiens OX=9606 GN=SH3BGRL PE=1 SV=1	15200	7	7.60809	-0.23173	28.0138	-1.04788	0.316354	0.999947	-4.62523	CA	no_hit
NUTF2	P61970	Nuclear transport factor 2 OS=Homo sapiens OX=9606 GN=NUTF2 PE=1 SV=1	16465.4	6	8.20927	-0.148778	29.1671	-1.04731	0.316609	0.999947	-4.62545	CA	no_hit
GLO1	Q04760|Q04760-2	Lactoylglutathione lyase OS=Homo sapiens OX=9606 GN=GLO1 PE=1 SV=4|Isoform 2 of Lactoylglutathione lyase OS=Homo sapiens OX=9606 GN=GLO1	26468.1|24734.4	6	8.06973	-0.197866	27.9762	-1.04709	0.316705	0.999947	-4.62553	CA	no_hit
XP32	Q5T750	Skin-specific protein 32 OS=Homo sapiens OX=9606 GN=XP32 PE=1 SV=1	31599.2	4	6.93507	-1.18227	24.4497	-1.04669	0.316882	0.999947	-4.62568	CA	no_hit
HLA-C	A0A140T912|A0A140T930|A0A140T937|A0A140T9M5|A0A1W2PR11|A0A1W2PRZ0|A0A140T962|A0A140T9B3|A0A140T9J9	HLA class I histocompatibility antigen, C alpha chain OS=Homo sapiens OX=9606 GN=HLA-C PE=1 SV=1|HLA class I histocompatibility antigen, C alpha chain OS=Homo sapiens OX=9606 GN=HLA-C PE=1 SV=1|HLA class I histocompatibility antigen, C alpha chain OS=Homo sapiens OX=9606 GN=HLA-C PE=1 SV=1|HLA class I histocompatibility antigen, C alpha chain (Fragment) OS=Homo sapiens OX=9606 GN=HLA-C PE=1 SV=1|…	44938.7|47960.6|41082.9|31830.9|40210.1|39782.9|45053.9|48419.7|45397.9	5	7.06652	0.15514	26.0865	1.0464	0.317008	0.999947	-4.62579	CA	no_hit
SUPT5H	O00267-2|O00267	Isoform 2 of Transcription elongation factor SPT5 OS=Homo sapiens OX=9606 GN=SUPT5H|Transcription elongation factor SPT5 OS=Homo sapiens OX=9606 GN=SUPT5H PE=1 SV=1	139684.0|140185.0	34	7.94719	0.217986	31.3341	1.04596	0.317205	0.999947	-4.62596	CA	no_hit
HMG20A	Q9NP66	High mobility group protein 20A OS=Homo sapiens OX=9606 GN=HMG20A PE=1 SV=1	47115.8	5	7.05934	0.224833	26.7909	1.04556	0.31738	0.999947	-4.62611	CA	no_hit
PRXL2A	Q9BRX8|Q9BRX8-2	Peroxiredoxin-like 2A OS=Homo sapiens OX=9606 GN=PRXL2A PE=1 SV=3|Isoform 2 of Peroxiredoxin-like 2A OS=Homo sapiens OX=9606 GN=PRXL2A	32554.0|31253.4	5	7.80166	-0.1581	28.5188	-1.04556	0.31738	0.999947	-4.62611	CA	no_hit
PMM2	O15305	Phosphomannomutase 2 OS=Homo sapiens OX=9606 GN=PMM2 PE=1 SV=1	34794.7	13	8.40588	-0.116463	29.4302	-1.04526	0.317514	0.999947	-4.62622	CA	no_hit
ENOPH1	Q9UHY7	Enolase-phosphatase E1 OS=Homo sapiens OX=9606 GN=ENOPH1 PE=1 SV=1	33040.2	5	7.39257	-0.125834	27.0613	-1.04483	0.317705	0.999947	-4.62639	CA	no_hit
DYM	Q7RTS9	Dymeclin OS=Homo sapiens OX=9606 GN=DYM PE=1 SV=1	85089.1	2	6.82073	-0.144264	25.987	-1.04432	0.317929	0.999947	-4.62658	CA	no_hit
AHNAK	Q09666	Neuroblast differentiation-associated protein AHNAK OS=Homo sapiens OX=9606 GN=AHNAK PE=1 SV=2	880792	235	8.89102	0.164009	34.4869	1.04396	0.318088	0.999947	-4.62671	CA	no_hit
CBX8	Q9HC52	Chromobox protein homolog 8 OS=Homo sapiens OX=9606 GN=CBX8 PE=1 SV=3	52001.3	7	7.11078	0.203189	28.2899	1.04386	0.318133	0.999947	-4.62675	CA	no_hit
RGP1	Q92546	RAB6A-GEF complex partner protein 2 OS=Homo sapiens OX=9606 GN=RGP1 PE=1 SV=1	45984	3	6.30692	-0.120309	24.2563	-1.04384	0.318144	0.999947	-4.62676	CA	no_hit
MRPS26	Q9BYN8	28S ribosomal protein S26, mitochondrial OS=Homo sapiens OX=9606 GN=MRPS26 PE=1 SV=1	27295.9	8	7.75929	0.131227	28.69	1.04376	0.318177	0.999947	-4.62679	CA	no_hit
DDT	P30046	D-dopachrome decarboxylase OS=Homo sapiens OX=9606 GN=DDT PE=1 SV=3	14034.5	9	8.03368	-0.169126	28.7147	-1.04349	0.318299	0.999947	-4.62689	CA	no_hit
RPL7A	P62424	60S ribosomal protein L7a OS=Homo sapiens OX=9606 GN=RPL7A PE=1 SV=2	42012.2	14	8.78637	0.262404	31.6557	1.043	0.318516	0.999947	-4.62708	CA	no_hit
RARS1	P54136|P54136-2	Arginine--tRNA ligase, cytoplasmic OS=Homo sapiens OX=9606 GN=RARS1 PE=1 SV=2|Isoform Monomeric of Arginine--tRNA ligase, cytoplasmic OS=Homo sapiens OX=9606 GN=RARS1	92860.6|82326.7	29	8.54706	-0.110413	31.3132	-1.04253	0.318722	0.999947	-4.62725	CA	no_hit
IQGAP1	P46940	Ras GTPase-activating-like protein IQGAP1 OS=Homo sapiens OX=9606 GN=IQGAP1 PE=1 SV=1	230525	63	8.60745	-0.110509	32.4822	-1.04213	0.3189	0.999947	-4.62741	CA	no_hit
PPM1F	B5MCT7|P49593|P49593-2	Protein phosphatase 1F OS=Homo sapiens OX=9606 GN=PPM1F PE=1 SV=1|Protein phosphatase 1F OS=Homo sapiens OX=9606 GN=PPM1F PE=1 SV=3|Isoform 2 of Protein phosphatase 1F OS=Homo sapiens OX=9606 GN=PPM1F	32935.8|53621.7|40852.1	5	7.12519	-0.142026	26.5326	-1.04176	0.319064	0.999947	-4.62755	CA	no_hit
AKR1B10	O60218	Aldo-keto reductase family 1 member B10 OS=Homo sapiens OX=9606 GN=AKR1B10 PE=1 SV=2	46263.8	25	9.60697	-0.109465	32.3049	-1.04154	0.319161	0.999947	-4.62763	CA	no_hit
H1-2	P16403	Histone H1.2 OS=Homo sapiens OX=9606 GN=H1-2 PE=1 SV=2	39300	6	8.33812	0.38597	29.7534	1.04136	0.319245	0.999947	-4.6277	CA	no_hit
MRTFB	Q9ULH7|Q9ULH7-4|Q9ULH7-5	Myocardin-related transcription factor B OS=Homo sapiens OX=9606 GN=MRTFB PE=1 SV=3|Isoform 4 of Myocardin-related transcription factor B OS=Homo sapiens OX=9606 GN=MRTFB|Isoform 5 of Myocardin-related transcription factor B OS=Homo sapiens OX=9606 GN=MRTFB	138360.0|132472.0|137819.0	4	6.77679	0.0877608	27.0644	1.04116	0.319334	0.999947	-4.62777	CA	no_hit
RPL32	D3YTB1|F8W727|P62910	60S ribosomal protein L32 (Fragment) OS=Homo sapiens OX=9606 GN=RPL32 PE=1 SV=1|60S ribosomal protein L32 OS=Homo sapiens OX=9606 GN=RPL32 PE=1 SV=1|60S ribosomal protein L32 OS=Homo sapiens OX=9606 GN=RPL32 PE=1 SV=2	21196.5|23597.6|21439.6	6	8.65809	0.204622	30.3683	1.04057	0.319595	0.999947	-4.628	CA	no_hit
TRUB2	O95900	Mitochondrial mRNA pseudouridine synthase TRUB2 OS=Homo sapiens OX=9606 GN=TRUB2 PE=1 SV=1	43040.5	4	6.67575	0.146669	26.5568	1.04057	0.319596	0.999947	-4.628	CA	no_hit
CAPN2	P17655	Calpain-2 catalytic subunit OS=Homo sapiens OX=9606 GN=CAPN2 PE=1 SV=6	93272.6	21	8.5906	-0.0976856	30.8473	-1.04048	0.319635	0.999947	-4.62803	CA	no_hit
RBM22	Q9NW64	Pre-mRNA-splicing factor RBM22 OS=Homo sapiens OX=9606 GN=RBM22 PE=1 SV=1	56428.6	10	7.51075	0.145872	29.2635	1.03966	0.32	0.999947	-4.62834	CA	no_hit
PEAK1	Q9H792	Inactive tyrosine-protein kinase PEAK1 OS=Homo sapiens OX=9606 GN=PEAK1 PE=1 SV=4	233369	3	6.34625	0.157259	24.1047	1.03947	0.320082	0.999947	-4.62841	CA	no_hit
TYMP	A0A494C0L6|C9JGI3|P19971|A0A494C0A4|P19971-2	Thymidine phosphorylase (Fragment) OS=Homo sapiens OX=9606 GN=TYMP PE=1 SV=1|Thymidine phosphorylase (Fragment) OS=Homo sapiens OX=9606 GN=TYMP PE=1 SV=1|Thymidine phosphorylase OS=Homo sapiens OX=9606 GN=TYMP PE=1 SV=2|Thymidine phosphorylase (Fragment) OS=Homo sapiens OX=9606 GN=TYMP PE=1 SV=1|Thymidine phosphorylase (Fragment) OS=Homo sapiens OX=9606 GN=TYMP PE=1 SV=1|Thymidine phosphorylase (…	31743.2|49499.4|53669.6|8695.52|54118.9	4	6.5303	-0.14394	24.7716	-1.03853	0.320502	0.999947	-4.62877	CA	no_hit
TBC1D9B	Q66K14|Q66K14-2	TBC1 domain family member 9B OS=Homo sapiens OX=9606 GN=TBC1D9B PE=1 SV=3|Isoform 2 of TBC1 domain family member 9B OS=Homo sapiens OX=9606 GN=TBC1D9B	162566.0|160712.0	20	7.32221	-0.108721	29.1542	-1.03819	0.320654	0.999947	-4.62889	CA	no_hit
GPX4	A0A087WT12|A0A087X2I2|P36969|P36969-2|K7ERP4	Glutathione peroxidase OS=Homo sapiens OX=9606 GN=GPX4 PE=1 SV=1|Glutathione peroxidase OS=Homo sapiens OX=9606 GN=GPX4 PE=1 SV=1|Phospholipid hydroperoxide glutathione peroxidase OS=Homo sapiens OX=9606 GN=GPX4 PE=1 SV=3|Isoform Cytoplasmic of Phospholipid hydroperoxide glutathione peroxidase OS=Homo sapiens OX=9606 GN=GPX4|Glutathione peroxidase OS=Homo sapiens OX=9606 GN=GPX4 PE=1 SV=1|Glutath…	33642.1|27694.7|27845.7|24780.0|22827.2	5	6.70663	-0.0939788	25.9877	-1.03787	0.320799	0.999947	-4.62902	CA	no_hit
MRPL1	Q9BYD6	39S ribosomal protein L1, mitochondrial OS=Homo sapiens OX=9606 GN=MRPL1 PE=1 SV=2	48064.9	10	7.71372	0.110186	29.1005	1.0377	0.320872	0.999947	-4.62908	CA	no_hit
MAT2A	P31153|P31153-2	S-adenosylmethionine synthase isoform type-2 OS=Homo sapiens OX=9606 GN=MAT2A PE=1 SV=1|Isoform 2 of S-adenosylmethionine synthase isoform type-2 OS=Homo sapiens OX=9606 GN=MAT2A	52189.1|38952.1	18	8.61732	-0.119762	30.6245	-1.03727	0.321065	0.999947	-4.62924	CA	no_hit
WDR19	Q8NEZ3	WD repeat-containing protein 19 OS=Homo sapiens OX=9606 GN=WDR19 PE=1 SV=2	180496	3	6.09898	-0.117408	24.334	-1.03645	0.321431	0.999947	-4.62955	CA	no_hit
APIP	Q96GX9	Methylthioribulose-1-phosphate dehydratase OS=Homo sapiens OX=9606 GN=APIP PE=1 SV=1	33818.6	8	7.62184	-0.095638	28.0404	-1.03624	0.321526	0.999947	-4.62963	CA	no_hit
PB2	P03428	Polymerase basic protein 2 OS=Influenza A virus (strain A/Puerto Rico/8/1934 H1N1) OX=211044 GN=PB2 PE=1 SV=2	99709.8	43	8.80114	0.240954	33.0941	1.036	0.32163	0.999947	-4.62972	CA	no_hit
H1FX	Q92522	Histone H1x OS=Homo sapiens OX=9606 GN=H1FX PE=1 SV=1	34946	11	8.09716	0.34287	30.262	1.03566	0.321782	0.999947	-4.62985	CA	no_hit
RPRD1B	Q9NQG5	Regulation of nuclear pre-mRNA domain-containing protein 1B OS=Homo sapiens OX=9606 GN=RPRD1B PE=1 SV=1	45813.2	10	7.32881	0.211368	28.1273	1.0347	0.322216	0.999947	-4.63021	CA	no_hit
EIF1AD	E9PLI6|E9PS76|Q8N9N8	Probable RNA-binding protein EIF1AD (Fragment) OS=Homo sapiens OX=9606 GN=EIF1AD PE=1 SV=1|Probable RNA-binding protein EIF1AD (Fragment) OS=Homo sapiens OX=9606 GN=EIF1AD PE=1 SV=1|Probable RNA-binding protein EIF1AD OS=Homo sapiens OX=9606 GN=EIF1AD PE=1 SV=1	16457.2|16571.2|22444.8	4	6.90047	-0.109597	25.2572	-1.03437	0.322359	0.999947	-4.63033	CA	no_hit
DNAJA1	P31689	DnaJ homolog subfamily A member 1 OS=Homo sapiens OX=9606 GN=DNAJA1 PE=1 SV=2	56532.2	18	8.65629	0.132908	30.9225	1.03432	0.322382	0.999947	-4.63035	CA	no_hit
F11R	Q9Y624	Junctional adhesion molecule A OS=Homo sapiens OX=9606 GN=F11R PE=1 SV=1	37829	7	7.35329	-0.18	27.4402	-1.0343	0.322392	0.999947	-4.63036	CA	no_hit
FAM49B	Q9NUQ9	Protein FAM49B OS=Homo sapiens OX=9606 GN=FAM49B PE=1 SV=1	43398.1	11	8.06508	-0.0965813	29.6762	-1.03401	0.322523	0.999947	-4.63047	CA	no_hit
PHKA1	A6NIT2|A6NMN0|P46020|P46020-2|P46020-3	Phosphorylase b kinase regulatory subunit OS=Homo sapiens OX=9606 GN=PHKA1 PE=1 SV=1|Phosphorylase b kinase regulatory subunit OS=Homo sapiens OX=9606 GN=PHKA1 PE=1 SV=1|Phosphorylase b kinase regulatory subunit alpha, skeletal muscle isoform OS=Homo sapiens OX=9606 GN=PHKA1 PE=1 SV=2|Isoform 2 of Phosphorylase b kinase regulatory subunit alpha, skeletal muscle isoform OS=Homo sapiens OX=9606 GN=…	151106.0|158853.0|157112.0|155609.0|147862.0	19	7.45158	-0.116921	29.5223	-1.03391	0.322566	0.999947	-4.6305	CA	no_hit
BAIAP2	I3L4C2|Q9UQB8|Q9UQB8-2|Q9UQB8-3|Q9UQB8-4|Q9UQB8-5|Q9UQB8-6	Brain-specific angiogenesis inhibitor 1-associated protein 2 OS=Homo sapiens OX=9606 GN=BAIAP2 PE=1 SV=1|Brain-specific angiogenesis inhibitor 1-associated protein 2 OS=Homo sapiens OX=9606 GN=BAIAP2 PE=1 SV=1|Isoform 2 of Brain-specific angiogenesis inhibitor 1-associated protein 2 OS=Homo sapiens OX=9606 GN=BAIAP2|Isoform 3 of Brain-specific angiogenesis inhibitor 1-associated protein 2 OS=Homo…	74956.1|74195.6|72285.8|69595.3|70327.7|70413.7|70398.7	10	6.75962	0.163324	27.3879	1.03258	0.323162	0.999947	-4.631	CA	no_hit
TRIP4	Q15650	Activating signal cointegrator 1 OS=Homo sapiens OX=9606 GN=TRIP4 PE=1 SV=4	83387.4	11	7.23356	0.242789	29.5426	1.03172	0.323548	0.999947	-4.63133	CA	no_hit
PLEKHA6	A0A1B0GUN5|Q5VTI5|Q9Y2H5|A0A1B0GW03	Pleckstrin homology domain-containing family A member 6 OS=Homo sapiens OX=9606 GN=PLEKHA6 PE=1 SV=1|Pleckstrin homology domain-containing family A member 6 OS=Homo sapiens OX=9606 GN=PLEKHA6 PE=1 SV=1|Pleckstrin homology domain-containing family A member 6 OS=Homo sapiens OX=9606 GN=PLEKHA6 PE=1 SV=4|Pleckstrin homology domain-containing family A member 6 OS=Homo sapiens OX=9606 GN=PLEKHA6 PE=1 …	150412.0|137927.0|135651.0|17869.2	10	7.00164	0.195637	28.0459	1.03023	0.324216	0.999947	-4.63188	CA	no_hit
WWC1	H3BLZ3|Q8IX03|Q8IX03-2	Protein KIBRA (Fragment) OS=Homo sapiens OX=9606 GN=WWC1 PE=1 SV=1|Protein KIBRA OS=Homo sapiens OX=9606 GN=WWC1 PE=1 SV=1|Isoform 2 of Protein KIBRA OS=Homo sapiens OX=9606 GN=WWC1|Protein KIBRA OS=Homo sapiens OX=9606 GN=WWC1 PE=1 SV=1|Isoform 2 of Protein KIBRA OS=Homo sapiens OX=9606 GN=WWC1	144132.0|148533.0|149136.0	5	6.95474	-0.110093	27.1195	-1.0296	0.324501	0.999947	-4.63212	CA	no_hit
STRIP2	Q9ULQ0|Q9ULQ0-2	Striatin-interacting protein 2 OS=Homo sapiens OX=9606 GN=STRIP2 PE=1 SV=2|Striatin-interacting protein 2 OS=Homo sapiens OX=9606 GN=STRIP2 PE=1 SV=2|Isoform 2 of Striatin-interacting protein 2 OS=Homo sapiens OX=9606 GN=STRIP2	111478.0|101972.0	5	6.55408	-0.0963846	26.2413	-1.02931	0.324634	0.999947	-4.63223	CA	no_hit
ACTR1B	P42025	Beta-centractin OS=Homo sapiens OX=9606 GN=ACTR1B PE=1 SV=1	49377.5	6	6.96797	-0.094648	27.2525	-1.02896	0.324788	0.999947	-4.63236	CA	no_hit
STAU1	O95793|O95793-2|O95793-3	Double-stranded RNA-binding protein Staufen homolog 1 OS=Homo sapiens OX=9606 GN=STAU1 PE=1 SV=2|Isoform Short of Double-stranded RNA-binding protein Staufen homolog 1 OS=Homo sapiens OX=9606 GN=STAU1|Isoform 3 of Double-stranded RNA-binding protein Staufen homolog 1 OS=Homo sapiens OX=9606 GN=STAU1|Double-stranded RNA-binding protein Staufen homolog 1 OS=Homo sapiens OX=9606 GN=STAU1 PE=1 SV=2|I…	78334.0|69729.6|70734.2	13	7.33001	0.206244	29.8891	1.02889	0.32482	0.999947	-4.63239	CA	no_hit
DLG1	A0A0C4DFT3|A0A590UJ08|A0A590UJ18|A0A590UJ68|A0A590UJ81|A0A590UJC5|A0A590UJD9|A0A590UJR5|A0A590UJS9|A0A590UKA8|Q12959|Q12959-2|Q12959-3|Q12959-4|Q12959-5|Q12959-6|Q12959-7|A0A590UJ64	Disks large homolog 1 OS=Homo sapiens OX=9606 GN=DLG1 PE=1 SV=1|Disks large homolog 1 OS=Homo sapiens OX=9606 GN=DLG1 PE=1 SV=1|Disks large homolog 1 OS=Homo sapiens OX=9606 GN=DLG1 PE=1 SV=1|Disks large homolog 1 OS=Homo sapiens OX=9606 GN=DLG1 PE=1 SV=1|Disks large homolog 1 OS=Homo sapiens OX=9606 GN=DLG1 PE=1 SV=1|Disks large homolog 1 OS=Homo sapiens OX=9606 GN=DLG1 PE=1 SV=1|Disks large hom…	118594.0|116813.0|112664.0|114330.0|115760.0|117230.0|121971.0|115708.0|110866.0|116239.0|118018.0|122099.0|114641.0|118722.0|112732.0|116654.0|119772.0|88899.3	11	7.36471	0.0945545	28.0329	1.02877	0.324874	0.999947	-4.63243	CA	no_hit
SLC4A2	P04920-3	Isoform 3 of Anion exchange protein 2 OS=Homo sapiens OX=9606 GN=SLC4A2	150059	22	7.62489	0.0968431	29.5904	1.02859	0.324956	0.999947	-4.6325	CA	no_hit
MFN2	O95140	Mitofusin-2 OS=Homo sapiens OX=9606 GN=MFN2 PE=1 SV=3	100473	13	7.42952	-0.101886	27.6875	-1.02837	0.325057	0.999947	-4.63258	CA	no_hit
MOB2	A0A087WVS8|Q70IA6|Q70IA6-3|Q70IA6-2	MOB kinase activator 2 OS=Homo sapiens OX=9606 GN=MOB2 PE=1 SV=2|MOB kinase activator 2 OS=Homo sapiens OX=9606 GN=MOB2 PE=1 SV=1|Isoform 3 of MOB kinase activator 2 OS=Homo sapiens OX=9606 GN=MOB2|MOB kinase activator 2 OS=Homo sapiens OX=9606 GN=MOB2 PE=1 SV=2|MOB kinase activator 2 OS=Homo sapiens OX=9606 GN=MOB2 PE=1 SV=1|Isoform 2 of MOB kinase activator 2 OS=Homo sapiens OX=9606 GN=MOB2|Iso…	32071.9|32423.0|36448.1|20671.8	3	7.127	-0.116157	26.2999	-1.02806	0.325194	0.999947	-4.6327	CA	no_hit
IVD	A0A0A0MT83|P26440|A0A0S2Z4K7|P26440-2	Isovaleryl-CoA dehydrogenase isoform 1 OS=Homo sapiens OX=9606 GN=IVD PE=1 SV=2|Isovaleryl-CoA dehydrogenase, mitochondrial OS=Homo sapiens OX=9606 GN=IVD PE=1 SV=2|Isovaleryl-CoA dehydrogenase isoform 1 OS=Homo sapiens OX=9606 GN=IVD PE=1 SV=2|Isovaleryl-CoA dehydrogenase isoform 2 (Fragment) OS=Homo sapiens OX=9606 GN=IVD PE=1 SV=1|Isovaleryl-CoA dehydrogenase, mitochondrial OS=Homo sapiens OX=…	54103.8|54434.9|49598.3|49929.4	10	7.46866	-0.108465	28.2999	-1.0278	0.325313	0.999947	-4.6328	CA	no_hit
MBNL1	A0A0A0MQX8|C9JP00|H7C4T5|Q9NR56|Q9NR56-2|Q9NR56-3|Q9NR56-4|Q9NR56-5|Q9NR56-6|Q9NR56-7	Muscleblind-like protein 1 OS=Homo sapiens OX=9606 GN=MBNL1 PE=1 SV=1|Muscleblind-like protein 1 OS=Homo sapiens OX=9606 GN=MBNL1 PE=1 SV=1|Muscleblind-like protein 1 (Fragment) OS=Homo sapiens OX=9606 GN=MBNL1 PE=1 SV=1|Muscleblind-like protein 1 OS=Homo sapiens OX=9606 GN=MBNL1 PE=1 SV=2|Isoform 2 of Muscleblind-like protein 1 OS=Homo sapiens OX=9606 GN=MBNL1|Isoform 3 of Muscleblind-like prote…	49224.6|43843.7|41159.1|48007.0|45413.5|38332.7|39550.3|46631.1|42467.8|42442.8	5	7.69134	0.119105	27.7978	1.02755	0.325423	0.999947	-4.63289	CA	no_hit
PKN2	Q16513-2|Q16513	Isoform 2 of Serine/threonine-protein kinase N2 OS=Homo sapiens OX=9606 GN=PKN2|Serine/threonine-protein kinase N2 OS=Homo sapiens OX=9606 GN=PKN2 PE=1 SV=1	130600.0|132897.0	17	7.15252	-0.102942	29.1497	-1.02711	0.325621	0.999947	-4.63305	CA	no_hit
GCA	H7BXD5|H7C2Z6|P28676	Grancalcin OS=Homo sapiens OX=9606 GN=GCA PE=1 SV=1|Grancalcin (Fragment) OS=Homo sapiens OX=9606 GN=GCA PE=1 SV=1|Grancalcin OS=Homo sapiens OX=9606 GN=GCA PE=1 SV=2	24452.2|19530.9|26352.0	3	6.70969	-0.142721	24.9419	-1.02522	0.326478	0.999947	-4.63376	CA	no_hit
TRAF6	Q9Y4K3	TNF receptor-associated factor 6 OS=Homo sapiens OX=9606 GN=TRAF6 PE=1 SV=1	68241.1	4	6.76502	-0.0933201	25.242	-1.02514	0.326512	0.999947	-4.63379	CA	no_hit
HACD2	Q6Y1H2	Very-long-chain (3R)-3-hydroxyacyl-CoA dehydratase 2 OS=Homo sapiens OX=9606 GN=HACD2 PE=1 SV=1	32361.8	5	8.2057	-0.129766	28.4586	-1.02456	0.326773	0.999947	-4.63401	CA	no_hit
UBR1	A0A087WTJ9|Q8IWV7	E3 ubiquitin-protein ligase OS=Homo sapiens OX=9606 GN=UBR1 PE=1 SV=1|E3 ubiquitin-protein ligase UBR1 OS=Homo sapiens OX=9606 GN=UBR1 PE=1 SV=1|E3 ubiquitin-protein ligase UBR1 OS=Homo sapiens OX=9606 GN=UBR1 PE=1 SV=1	147907.0|233257.0	13	6.78822	-0.116132	27.4061	-1.02415	0.326961	0.999947	-4.63416	CA	no_hit
LUZP1	Q86V48|Q86V48-2|Q86V48-3	Leucine zipper protein 1 OS=Homo sapiens OX=9606 GN=LUZP1 PE=1 SV=2|Isoform 2 of Leucine zipper protein 1 OS=Homo sapiens OX=9606 GN=LUZP1|Isoform 3 of Leucine zipper protein 1 OS=Homo sapiens OX=9606 GN=LUZP1|Leucine zipper protein 1 OS=Homo sapiens OX=9606 GN=LUZP1 PE=1 SV=2	150280.0|144178.0|147144.0	29	7.28404	0.174875	30.2084	1.02383	0.327105	0.999947	-4.63428	CA	no_hit
EIF3I	Q13347	Eukaryotic translation initiation factor 3 subunit I OS=Homo sapiens OX=9606 GN=EIF3I PE=1 SV=1	42049.3	20	8.52547	-0.112519	30.7145	-1.02327	0.327358	0.999947	-4.63449	CA	no_hit
CAPNS1	A0A0C4DGQ5|P04632	Calpain small subunit 1 OS=Homo sapiens OX=9606 GN=CAPNS1 PE=1 SV=1|Calpain small subunit 1 OS=Homo sapiens OX=9606 GN=CAPNS1 PE=1 SV=1	37091.8|31206.7	8	8.49318	-0.110959	29.4885	-1.02324	0.327371	0.999947	-4.6345	CA	no_hit
TRIR	Q9BQ61	Telomerase RNA component interacting RNase OS=Homo sapiens OX=9606 GN=TRIR PE=1 SV=1	23636.8	2	7.37158	0.209839	26.57	1.02272	0.327609	0.999947	-4.6347	CA	no_hit
TARDBP	Q13148	TAR DNA-binding protein 43 OS=Homo sapiens OX=9606 GN=TARDBP PE=1 SV=1	51137.6	12	8.11284	-0.0904511	29.4142	-1.02269	0.327622	0.999947	-4.63471	CA	no_hit
NAP1L4	Q99733|Q99733-2	Nucleosome assembly protein 1-like 4 OS=Homo sapiens OX=9606 GN=NAP1L4 PE=1 SV=1|Isoform 2 of Nucleosome assembly protein 1-like 4 OS=Homo sapiens OX=9606 GN=NAP1L4	52702.6|54622.6	10	8.27911	-0.135497	29.3649	-1.02237	0.327768	0.999947	-4.63483	CA	no_hit
APRT	P07741	Adenine phosphoribosyltransferase OS=Homo sapiens OX=9606 GN=APRT PE=1 SV=2	22200.2	8	8.53387	-0.128142	28.8898	-1.02163	0.328101	0.999947	-4.6351	CA	no_hit
MTMR1	F8WA39|Q13613|Q13613-2	Myotubularin-related protein 1 OS=Homo sapiens OX=9606 GN=MTMR1 PE=1 SV=1|Myotubularin-related protein 1 OS=Homo sapiens OX=9606 GN=MTMR1 PE=1 SV=4|Isoform 1A of Myotubularin-related protein 1 OS=Homo sapiens OX=9606 GN=MTMR1|Myotubularin-related protein 1 OS=Homo sapiens OX=9606 GN=MTMR1 PE=1 SV=1|Myotubularin-related protein 1 OS=Homo sapiens OX=9606 GN=MTMR1 PE=1 SV=4	87667.1|86627.5|74374.1	6	6.98527	-0.103449	27.2006	-1.02154	0.328144	0.999947	-4.63514	CA	no_hit
ZC3H11A	O75152	Zinc finger CCCH domain-containing protein 11A OS=Homo sapiens OX=9606 GN=ZC3H11A PE=1 SV=3	115789	15	7.31377	0.217829	29.4129	1.02078	0.328486	0.999947	-4.63542	CA	no_hit
PEPD	P12955	Xaa-Pro dipeptidase OS=Homo sapiens OX=9606 GN=PEPD PE=1 SV=3	61091.1	19	8.05422	-0.112187	29.5362	-1.0207	0.328523	0.999947	-4.63545	CA	no_hit
GTF2I	A0A494C1K3	General transcription factor II-I OS=Homo sapiens OX=9606 GN=GTF2I PE=1 SV=1	165359	45	8.04918	0.125718	31.8151	1.02059	0.328575	0.999947	-4.63549	CA	no_hit
CUL5	Q93034	Cullin-5 OS=Homo sapiens OX=9606 GN=CUL5 PE=1 SV=4	114283	20	7.41252	-0.10745	29.5577	-1.01991	0.328883	0.999947	-4.63574	CA	no_hit
UBA5	E7EQ61|E7EWE1|Q9GZZ9	Ubiquitin-like modifier-activating enzyme 5 OS=Homo sapiens OX=9606 GN=UBA5 PE=1 SV=1|Ubiquitin-like modifier-activating enzyme 5 OS=Homo sapiens OX=9606 GN=UBA5 PE=1 SV=1|Ubiquitin-like modifier-activating enzyme 5 OS=Homo sapiens OX=9606 GN=UBA5 PE=1 SV=1	48060.1|44108.8|51678.9	6	7.76535	-0.100553	28.2789	-1.01947	0.329083	0.999947	-4.63591	CA	no_hit
H1-0	P07305	Histone H1.0 OS=Homo sapiens OX=9606 GN=H1-0 PE=1 SV=3	37885.8	4	7.54814	0.314609	27.7852	1.0192	0.329204	0.999947	-4.63601	CA	no_hit
LYSMD2	Q8IV50	LysM and putative peptidoglycan-binding domain-containing protein 2 OS=Homo sapiens OX=9606 GN=LYSMD2 PE=1 SV=1	26852.3	4	6.71995	-0.125247	28.003	-1.0192	0.329207	0.999947	-4.63601	CA	no_hit
AHCY	P23526	Adenosylhomocysteinase OS=Homo sapiens OX=9606 GN=AHCY PE=1 SV=4	57077.4	21	8.81151	-0.103713	31.4696	-1.01876	0.329403	0.999947	-4.63617	CA	no_hit
EXOC8	Q8IYI6	Exocyst complex component 8 OS=Homo sapiens OX=9606 GN=EXOC8 PE=1 SV=2	93991.6	15	7.55358	-0.124499	29.06	-1.01792	0.329788	0.999947	-4.63648	CA	no_hit
PATL1	Q86TB9|Q86TB9-4	Protein PAT1 homolog 1 OS=Homo sapiens OX=9606 GN=PATL1 PE=1 SV=2|Isoform 4 of Protein PAT1 homolog 1 OS=Homo sapiens OX=9606 GN=PATL1	97176.5|89934.5	12	7.1557	0.149898	28.5517	1.01741	0.330021	0.999947	-4.63667	CA	no_hit
SNRPD1	P62314	Small nuclear ribonucleoprotein Sm D1 OS=Homo sapiens OX=9606 GN=SNRPD1 PE=1 SV=1	16315.4	2	7.45963	0.152091	27.5648	1.01699	0.330212	0.999947	-4.63683	CA	no_hit
ALYREF	E9PB61|Q86V81	THO complex subunit 4 OS=Homo sapiens OX=9606 GN=ALYREF PE=1 SV=1|THO complex subunit 4 OS=Homo sapiens OX=9606 GN=ALYREF PE=1 SV=1|THO complex subunit 4 OS=Homo sapiens OX=9606 GN=ALYREF PE=1 SV=3	30887.2|30217.9	9	8.04536	0.227859	29.891	1.0169	0.330252	0.999947	-4.63686	CA	no_hit
ZNF592	Q92610	Zinc finger protein 592 OS=Homo sapiens OX=9606 GN=ZNF592 PE=1 SV=2	164457	3	6.59657	0.258475	25.9465	1.01677	0.330312	0.999947	-4.63691	CA	no_hit
TMPO	H0YJH7|P42166|P42167|P42167-2	Lamina-associated polypeptide 2, isoforms beta/gamma (Fragment) OS=Homo sapiens OX=9606 GN=TMPO PE=1 SV=1|Lamina-associated polypeptide 2, isoform alpha OS=Homo sapiens OX=9606 GN=TMPO PE=1 SV=2|Lamina-associated polypeptide 2, isoforms beta/gamma OS=Homo sapiens OX=9606 GN=TMPO PE=1 SV=2|Isoform Gamma of Lamina-associated polypeptide 2, isoforms beta/gamma OS=Homo sapiens OX=9606 GN=TMPO|Lamina-…	34512.3|92443.0|61952.1|48505.9	38	8.25614	0.0907156	31.463	1.01657	0.330401	0.999947	-4.63698	CA	no_hit
IMPACT	A0A3B3ITH3|Q9P2X3	Protein IMPACT OS=Homo sapiens OX=9606 GN=IMPACT PE=1 SV=1|Protein IMPACT OS=Homo sapiens OX=9606 GN=IMPACT PE=1 SV=2	44805.4|44628.6	6	7.23918	-0.0840007	27.1381	-1.01597	0.330674	0.999947	-4.6372	CA	no_hit
SMC4	E9PD53|Q9NTJ3	Structural maintenance of chromosomes protein OS=Homo sapiens OX=9606 GN=SMC4 PE=1 SV=1|Structural maintenance of chromosomes protein 4 OS=Homo sapiens OX=9606 GN=SMC4 PE=1 SV=2|Structural maintenance of chromosomes protein 4 OS=Homo sapiens OX=9606 GN=SMC4 PE=1 SV=2	190072.0|192797.0	51	7.98677	-0.110026	31.556	-1.01542	0.330926	0.999947	-4.63741	CA	no_hit
RRM2	P31350|P31350-2	Ribonucleoside-diphosphate reductase subunit M2 OS=Homo sapiens OX=9606 GN=RRM2 PE=1 SV=1|Isoform 2 of Ribonucleoside-diphosphate reductase subunit M2 OS=Homo sapiens OX=9606 GN=RRM2	52434.9|59368.5	12	7.71483	-0.0994647	29.1225	-1.0149	0.331162	0.999947	-4.6376	CA	no_hit
RHOT1	Q8IXI2-2|Q8IXI2-3|H7BXZ6|Q8IXI2|Q8IXI2-4|Q8IXI2-5|Q8IXI2-7	Isoform 2 of Mitochondrial Rho GTPase 1 OS=Homo sapiens OX=9606 GN=RHOT1|Isoform 3 of Mitochondrial Rho GTPase 1 OS=Homo sapiens OX=9606 GN=RHOT1|Mitochondrial Rho GTPase OS=Homo sapiens OX=9606 GN=RHOT1 PE=1 SV=2|Mitochondrial Rho GTPase 1 OS=Homo sapiens OX=9606 GN=RHOT1 PE=1 SV=2|Isoform 2 of Mitochondrial Rho GTPase 1 OS=Homo sapiens OX=9606 GN=RHOT1|Isoform 3 of Mitochondrial Rho GTPase 1 OS…	89115.5|94858.3|81296.0|84542.0|79389.1|85482.2|90250.9	7	7.21286	-0.104299	27.9011	-1.01397	0.331588	0.999947	-4.63795	CA	no_hit
PSMD9	O00233	26S proteasome non-ATPase regulatory subunit 9 OS=Homo sapiens OX=9606 GN=PSMD9 PE=1 SV=3	28792.3	9	7.93516	-0.145802	28.646	-1.01354	0.331785	0.999947	-4.63811	CA	no_hit
DHX33	Q9H6R0	ATP-dependent RNA helicase DHX33 OS=Homo sapiens OX=9606 GN=DHX33 PE=1 SV=2	91733.4	7	6.753	0.256149	27.8545	1.01244	0.332287	0.999947	-4.63851	CA	no_hit
PANK4	A0A494C169|Q9NVE7	4'-phosphopantetheine phosphatase OS=Homo sapiens OX=9606 GN=PANK4 PE=1 SV=1|4'-phosphopantetheine phosphatase OS=Homo sapiens OX=9606 GN=PANK4 PE=1 SV=1	100941.0|99702.2	15	6.98707	-0.108049	28.1117	-1.01231	0.332347	0.999947	-4.63856	CA	no_hit
WDR77	Q9BQA1	Methylosome protein 50 OS=Homo sapiens OX=9606 GN=WDR77 PE=1 SV=1	40180.2	7	7.99632	-0.109515	28.239	-1.01111	0.332896	0.999947	-4.639	CA	no_hit
ANKFY1	Q9P2R3|Q9P2R3-2|Q9P2R3-4	Rabankyrin-5 OS=Homo sapiens OX=9606 GN=ANKFY1 PE=1 SV=2|Isoform 2 of Rabankyrin-5 OS=Homo sapiens OX=9606 GN=ANKFY1|Isoform 4 of Rabankyrin-5 OS=Homo sapiens OX=9606 GN=ANKFY1	145733.0|145821.0|150685.0	27	7.81902	-0.113604	30.107	-1.01037	0.333238	0.999947	-4.63928	CA	no_hit
ARHGAP35	Q9NRY4	Rho GTPase-activating protein 35 OS=Homo sapiens OX=9606 GN=ARHGAP35 PE=1 SV=3	204496	22	7.31266	-0.11279	29.26	-1.00979	0.333504	0.999947	-4.6395	CA	no_hit
NDUFA13	Q9P0J0	NADH dehydrogenase [ubiquinone] 1 alpha subcomplex subunit 13 OS=Homo sapiens OX=9606 GN=NDUFA13 PE=1 SV=3	18512.8	6	7.65317	-0.0988232	27.5117	-1.00954	0.33362	0.999947	-4.63959	CA	no_hit
RPS6KA3	B1AXG1|B4DG22|B7ZB17|P51812	Non-specific serine/threonine protein kinase OS=Homo sapiens OX=9606 GN=RPS6KA3 PE=1 SV=2|Non-specific serine/threonine protein kinase OS=Homo sapiens OX=9606 GN=RPS6KA3 PE=1 SV=1|Non-specific serine/threonine protein kinase OS=Homo sapiens OX=9606 GN=RPS6KA3 PE=1 SV=1|Ribosomal protein S6 kinase alpha-3 OS=Homo sapiens OX=9606 GN=RPS6KA3 PE=1 SV=1|Ribosomal protein S6 kinase alpha-3 OS=Homo sapi…	97164.9|96693.4|96821.4|100148.0	21	7.87998	-0.0919086	29.7928	-1.00871	0.333998	0.999947	-4.63989	CA	no_hit
ACTN1	H9KV75|P12814|P12814-3	Alpha-actinin-1 OS=Homo sapiens OX=9606 GN=ACTN1 PE=1 SV=1|Alpha-actinin-1 OS=Homo sapiens OX=9606 GN=ACTN1 PE=1 SV=2|Alpha-actinin-1 OS=Homo sapiens OX=9606 GN=ACTN1 PE=1 SV=1|Isoform 3 of Alpha-actinin-1 OS=Homo sapiens OX=9606 GN=ACTN1	110794.0|119990.0|123165.0	28	8.59712	-0.110085	31.4905	-1.00869	0.334006	0.999947	-4.6399	CA	no_hit
MYH10	P35580-2|P35580-4|P35580-5	Isoform 2 of Myosin-10 OS=Homo sapiens OX=9606 GN=MYH10|Isoform 4 of Myosin-10 OS=Homo sapiens OX=9606 GN=MYH10|Isoform 2 of Myosin-10 OS=Homo sapiens OX=9606 GN=MYH10|Isoform 5 of Myosin-10 OS=Homo sapiens OX=9606 GN=MYH10	291839.0|293587.0|291091.0	66	8.36297	-0.124995	31.736	-1.00832	0.334179	0.999947	-4.64004	CA	no_hit
SFN	P31947|P31947-2	14-3-3 protein sigma OS=Homo sapiens OX=9606 GN=SFN PE=1 SV=1|14-3-3 protein sigma OS=Homo sapiens OX=9606 GN=SFN PE=1 SV=1|Isoform 2 of 14-3-3 protein sigma OS=Homo sapiens OX=9606 GN=SFN	33042.3|28941.1	13	8.34131	-0.136344	29.8841	-1.00747	0.334568	0.999947	-4.64035	CA	no_hit
GPATCH4	A0A0A0MRK1|E9PAV9|F8W895|Q5T3I0|Q5T3I0-3	G patch domain-containing protein 4 OS=Homo sapiens OX=9606 GN=GPATCH4 PE=1 SV=1|G patch domain-containing protein 4 OS=Homo sapiens OX=9606 GN=GPATCH4 PE=1 SV=1|G patch domain-containing protein 4 (Fragment) OS=Homo sapiens OX=9606 GN=GPATCH4 PE=1 SV=1|G patch domain-containing protein 4 OS=Homo sapiens OX=9606 GN=GPATCH4 PE=1 SV=2|Isoform 3 of G patch domain-containing protein 4 OS=Homo sapiens…	56498.1|57044.3|40816.8|69439.8|69986.0	8	7.08631	0.336453	27.891	1.0068	0.334878	0.999947	-4.6406	CA	no_hit
UCHL3	A0A087WTB8|P15374|Q5TBK7	Ubiquitin carboxyl-terminal hydrolase OS=Homo sapiens OX=9606 GN=UCHL3 PE=1 SV=1|Ubiquitin carboxyl-terminal hydrolase isozyme L3 OS=Homo sapiens OX=9606 GN=UCHL3 PE=1 SV=1|Ubiquitin carboxyl-terminal hydrolase isozyme L3 (Fragment) OS=Homo sapiens OX=9606 GN=UCHL3 PE=1 SV=1	25752.4|30291.7|29984.7	5	7.41648	-0.137518	27.3574	-1.00679	0.334883	0.999947	-4.6406	CA	no_hit
ZPR1	O75312	Zinc finger protein ZPR1 OS=Homo sapiens OX=9606 GN=ZPR1 PE=1 SV=1	57851.6	10	7.26189	-0.0973153	27.6564	-1.00653	0.335004	0.999947	-4.6407	CA	no_hit
GNL3L	Q9NVN8	Guanine nucleotide-binding protein-like 3-like protein OS=Homo sapiens OX=9606 GN=GNL3L PE=1 SV=1	82643.1	12	6.99856	0.227151	29.0961	1.00641	0.335059	0.999947	-4.64074	CA	no_hit
ELOA	A0A024RAC6	Elongin-A OS=Homo sapiens OX=9606 GN=ELOA PE=1 SV=1	116475	9	6.75246	0.222608	27.2649	1.0064	0.335061	0.999947	-4.64074	CA	no_hit
COPS3	Q9UNS2	COP9 signalosome complex subunit 3 OS=Homo sapiens OX=9606 GN=COPS3 PE=1 SV=3	56930	16	7.95617	-0.108408	30.0609	-1.00554	0.33546	0.999947	-4.64106	CA	no_hit
CSTF1	Q05048	Cleavage stimulation factor subunit 1 OS=Homo sapiens OX=9606 GN=CSTF1 PE=1 SV=1	54905	13	7.63399	0.113431	29.441	1.00549	0.335479	0.999947	-4.64108	CA	no_hit
MRPL27	D6RAN8|Q9P0M9	39S ribosomal protein L27, mitochondrial OS=Homo sapiens OX=9606 GN=MRPL27 PE=1 SV=1|39S ribosomal protein L27, mitochondrial OS=Homo sapiens OX=9606 GN=MRPL27 PE=1 SV=1	12654.0|20074.4	5	7.52541	0.189622	26.8003	1.00462	0.335882	0.999947	-4.6414	CA	no_hit
GALK2	Q01415	N-acetylgalactosamine kinase OS=Homo sapiens OX=9606 GN=GALK2 PE=1 SV=1	59471.5	10	7.55333	-0.0929071	29.1284	-1.00446	0.335954	0.999947	-4.64146	CA	no_hit
TRIM33	Q9UPN9|Q9UPN9-2	E3 ubiquitin-protein ligase TRIM33 OS=Homo sapiens OX=9606 GN=TRIM33 PE=1 SV=3|Isoform Beta of E3 ubiquitin-protein ligase TRIM33 OS=Homo sapiens OX=9606 GN=TRIM33	144092.0|141492.0	16	7.12008	0.097377	28.3867	1.00402	0.33616	0.999947	-4.64162	CA	no_hit
PLEKHA5	Q9HAU0|Q9HAU0-2|Q9HAU0-4|Q9HAU0-6|Q9HAU0-5	Pleckstrin homology domain-containing family A member 5 OS=Homo sapiens OX=9606 GN=PLEKHA5 PE=1 SV=1|Isoform 2 of Pleckstrin homology domain-containing family A member 5 OS=Homo sapiens OX=9606 GN=PLEKHA5|Isoform 4 of Pleckstrin homology domain-containing family A member 5 OS=Homo sapiens OX=9606 GN=PLEKHA5|Isoform 6 of Pleckstrin homology domain-containing family A member 5 OS=Homo sapiens OX=96…	151132.0|158899.0|158979.0|173156.0|143118.0	20	7.19921	0.152013	29.1836	1.00387	0.336229	0.999947	-4.64168	CA	no_hit
PITHD1	Q9GZP4|Q9GZP4-2	PITH domain-containing protein 1 OS=Homo sapiens OX=9606 GN=PITHD1 PE=1 SV=1|Isoform 2 of PITH domain-containing protein 1 OS=Homo sapiens OX=9606 GN=PITHD1	26824.5|26767.5	4	7.11534	-0.124046	26.4707	-1.00276	0.336743	0.999947	-4.64209	CA	no_hit
MRPS16	A6ND22|Q9Y3D3	28S ribosomal protein S16, mitochondrial OS=Homo sapiens OX=9606 GN=MRPS16 PE=1 SV=1	13196.2|17692.5	5	7.49631	0.143861	27.8321	1.00252	0.336852	0.999947	-4.64217	CA	no_hit
GPATCH11	Q8N954	G patch domain-containing protein 11 OS=Homo sapiens OX=9606 GN=GPATCH11 PE=1 SV=4	42059.5	3	6.54756	0.114446	25.4579	1.00143	0.337357	0.999947	-4.64257	CA	no_hit
XPO4	F2Z2X4|Q9C0E2	Exportin-4 OS=Homo sapiens OX=9606 GN=XPO4 PE=1 SV=1|Exportin-4 OS=Homo sapiens OX=9606 GN=XPO4 PE=1 SV=2	145927.0|145608.0	11	7.13852	-0.0992911	27.3881	-1.00119	0.337469	0.999947	-4.64266	CA	no_hit
NRCAM	C9JYY6|Q92823|Q92823-2|Q92823-3|Q92823-4|Q92823-5|Q92823-6|A0A087X2B3	Neuronal cell adhesion molecule OS=Homo sapiens OX=9606 GN=NRCAM PE=1 SV=3|Neuronal cell adhesion molecule OS=Homo sapiens OX=9606 GN=NRCAM PE=1 SV=3|Isoform 2 of Neuronal cell adhesion molecule OS=Homo sapiens OX=9606 GN=NRCAM|Isoform 3 of Neuronal cell adhesion molecule OS=Homo sapiens OX=9606 GN=NRCAM|Isoform 4 of Neuronal cell adhesion molecule OS=Homo sapiens OX=9606 GN=NRCAM|Isoform 5 of Ne…	157401.0|168687.0|158982.0|153953.0|154027.0|169173.0|155333.0|99116.5	8	6.69984	0.137849	25.4413	1.00069	0.337698	0.999947	-4.64284	CA	no_hit
GSR	P00390|P00390-2|P00390-3	Glutathione reductase, mitochondrial OS=Homo sapiens OX=9606 GN=GSR PE=1 SV=2|Isoform Cytoplasmic of Glutathione reductase, mitochondrial OS=Homo sapiens OX=9606 GN=GSR|Isoform 2 of Glutathione reductase, mitochondrial OS=Homo sapiens OX=9606 GN=GSR	67134.2|62580.6|63545.4	22	8.75131	-0.105708	30.9343	-1.00016	0.337944	0.999947	-4.64304	CA	no_hit
MAGED2	Q9UNF1	Melanoma-associated antigen D2 OS=Homo sapiens OX=9606 GN=MAGED2 PE=1 SV=2	81208.4	16	8.0723	-0.0966042	30.3626	-1.00001	0.338014	0.999947	-4.64309	CA	no_hit
POLR3D	P05423	DNA-directed RNA polymerase III subunit RPC4 OS=Homo sapiens OX=9606 GN=POLR3D PE=1 SV=2	56707.7	2	6.70129	0.12727	25.0206	0.999964	0.338036	0.999947	-4.64311	CA	no_hit
KATNB1	Q9BVA0	Katanin p80 WD40 repeat-containing subunit B1 OS=Homo sapiens OX=9606 GN=KATNB1 PE=1 SV=1	83600.4	8	6.6082	0.101248	26.8349	0.99973	0.338144	0.999947	-4.6432	CA	no_hit
SEPTIN11	D6RER5|D6RGI3|Q9NVA2|Q9NVA2-2	Septin-11 OS=Homo sapiens OX=9606 GN=SEPTIN11 PE=1 SV=1|Septin 11, isoform CRA_b OS=Homo sapiens OX=9606 GN=SEPTIN11 PE=1 SV=1|Septin-11 OS=Homo sapiens OX=9606 GN=SEPTIN11 PE=1 SV=3|Isoform 2 of Septin-11 OS=Homo sapiens OX=9606 GN=SEPTIN11	64721.4|64166.3|64254.2|66286.4	4	7.54992	0.0978141	27.4801	0.999181	0.338399	0.999947	-4.6434	CA	no_hit
SNRPD3	P62318|P62318-2	Small nuclear ribonucleoprotein Sm D3 OS=Homo sapiens OX=9606 GN=SNRPD3 PE=1 SV=1|Isoform 2 of Small nuclear ribonucleoprotein Sm D3 OS=Homo sapiens OX=9606 GN=SNRPD3	17063.4|16191.8	4	7.40445	0.171107	28.2334	0.999098	0.338437	0.999947	-4.64343	CA	no_hit
FAM160B1	Q5W0V3|Q5W0V3-2	Protein FAM160B1 OS=Homo sapiens OX=9606 GN=FAM160B1 PE=1 SV=1|Isoform 2 of Protein FAM160B1 OS=Homo sapiens OX=9606 GN=FAM160B1|Protein FAM160B1 OS=Homo sapiens OX=9606 GN=FAM160B1 PE=1 SV=1	98537.9|95050.9	12	7.20838	-0.117889	28.2625	-0.998962	0.3385	0.999947	-4.64348	CA	no_hit
QKI	Q96PU8|Q96PU8-3|Q96PU8-5|Q96PU8-6|Q96PU8-8|Q96PU8-9	Protein quaking OS=Homo sapiens OX=9606 GN=QKI PE=1 SV=1|Isoform 2 of Protein quaking OS=Homo sapiens OX=9606 GN=QKI|Protein quaking OS=Homo sapiens OX=9606 GN=QKI PE=1 SV=1|Isoform 2 of Protein quaking OS=Homo sapiens OX=9606 GN=QKI|Isoform 3 of Protein quaking OS=Homo sapiens OX=9606 GN=QKI|Isoform 4 of Protein quaking OS=Homo sapiens OX=9606 GN=QKI|Isoform 5 of Protein quaking OS=Homo sapiens …	45061.7|44317.3|42321.1|43065.5|42640.4|42523.4	7	7.19515	0.170554	26.622	0.997973	0.338959	0.999947	-4.64384	CA	no_hit
CALCOCO2	Q13137|Q13137-3|Q13137-4|Q13137-5	Calcium-binding and coiled-coil domain-containing protein 2 OS=Homo sapiens OX=9606 GN=CALCOCO2 PE=1 SV=1|Isoform 3 of Calcium-binding and coiled-coil domain-containing protein 2 OS=Homo sapiens OX=9606 GN=CALCOCO2|Isoform 4 of Calcium-binding and coiled-coil domain-containing protein 2 OS=Homo sapiens OX=9606 GN=CALCOCO2|Isoform 5 of Calcium-binding and coiled-coil domain-containing protein 2 OS…	65434.4|67840.6|69640.8|55524.3	8	7.08947	0.0954105	27.5727	0.997736	0.339069	0.999947	-4.64393	CA	no_hit
COA7	Q96BR5	Cytochrome c oxidase assembly factor 7 OS=Homo sapiens OX=9606 GN=COA7 PE=1 SV=2	32821.7	5	7.27583	0.160707	28.0582	0.997382	0.339234	0.999947	-4.64406	CA	no_hit
PTPRM	E7EPS8|P28827|P28827-2	Receptor-type tyrosine-protein phosphatase mu OS=Homo sapiens OX=9606 GN=PTPRM PE=1 SV=2|Receptor-type tyrosine-protein phosphatase mu OS=Homo sapiens OX=9606 GN=PTPRM PE=1 SV=2|Isoform 2 of Receptor-type tyrosine-protein phosphatase mu OS=Homo sapiens OX=9606 GN=PTPRM	178041.0|185120.0|186496.0	7	6.36397	0.136445	25.6279	0.996954	0.339433	0.999947	-4.64421	CA	no_hit
GRB7	Q14451|Q14451-3|Q14451-4	Growth factor receptor-bound protein 7 OS=Homo sapiens OX=9606 GN=GRB7 PE=1 SV=2|Isoform 3 of Growth factor receptor-bound protein 7 OS=Homo sapiens OX=9606 GN=GRB7|Isoform 4 of Growth factor receptor-bound protein 7 OS=Homo sapiens OX=9606 GN=GRB7	66887.0|69933.6|62766.9	3	6.3591	-0.15649	24.2558	-0.994464	0.340592	0.999947	-4.64513	CA	no_hit
PUDP	Q08623|Q08623-3|Q08623-4	Pseudouridine-5'-phosphatase OS=Homo sapiens OX=9606 GN=PUDP PE=1 SV=3|Isoform 3 of Pseudouridine-5'-phosphatase OS=Homo sapiens OX=9606 GN=PUDP|Isoform 4 of Pseudouridine-5'-phosphatase OS=Homo sapiens OX=9606 GN=PUDP	30271.3|28477.4|32593.4	3	7.10984	-0.11585	26.9139	-0.994455	0.340596	0.999947	-4.64513	CA	no_hit
SMPD2	O60906|H0Y5N2	Sphingomyelin phosphodiesterase 2 OS=Homo sapiens OX=9606 GN=SMPD2 PE=1 SV=2|Sphingomyelin phosphodiesterase 2 (Fragment) OS=Homo sapiens OX=9606 GN=SMPD2 PE=1 SV=1|Sphingomyelin phosphodiesterase 2 OS=Homo sapiens OX=9606 GN=SMPD2 PE=1 SV=2	52995.6|26103.2	4	6.75242	-0.127229	25.8746	-0.994309	0.340665	0.999947	-4.64518	CA	no_hit
MANEAL	Q5VSG8|Q5VSG8-3|H0YCZ3	Glycoprotein endo-alpha-1,2-mannosidase-like protein OS=Homo sapiens OX=9606 GN=MANEAL PE=2 SV=1|Isoform 3 of Glycoprotein endo-alpha-1,2-mannosidase-like protein OS=Homo sapiens OX=9606 GN=MANEAL|Glycoprotein endo-alpha-1,2-mannosidase-like protein (Fragment) OS=Homo sapiens OX=9606 GN=MANEAL PE=1 SV=1|Glycoprotein endo-alpha-1,2-mannosidase-like protein OS=Homo sapiens OX=9606 GN=MANEAL PE=2 SV…	55961.8|29251.2|15618.7	2	6.2105	-0.113087	23.9047	-0.993935	0.340839	0.999947	-4.64532	CA	no_hit
ERCC6L	Q2NKX8	DNA excision repair protein ERCC-6-like OS=Homo sapiens OX=9606 GN=ERCC6L PE=1 SV=1	169668	24	7.41983	-0.104282	30.1104	-0.993789	0.340907	0.999947	-4.64537	CA	no_hit
CLUH	A0A494C0R8	Clustered mitochondria protein homolog OS=Homo sapiens OX=9606 GN=CLUH PE=1 SV=1	171570	36	7.95798	-0.112298	30.9103	-0.99233	0.341588	0.999947	-4.6459	CA	no_hit
CBX4	O00257	E3 SUMO-protein ligase CBX4 OS=Homo sapiens OX=9606 GN=CBX4 PE=1 SV=3	77794.6	4	6.55899	0.284159	26.0949	0.991992	0.341746	0.999947	-4.64603	CA	no_hit
PBLD	P30039|P30039-2	Phenazine biosynthesis-like domain-containing protein OS=Homo sapiens OX=9606 GN=PBLD PE=1 SV=2|Isoform 2 of Phenazine biosynthesis-like domain-containing protein OS=Homo sapiens OX=9606 GN=PBLD	36005.0|36237.4	5	6.90046	-0.10872	26.0278	-0.991656	0.341903	0.999947	-4.64615	CA	no_hit
INPP5A	Q14642|Q5T1B5	Inositol polyphosphate-5-phosphatase A OS=Homo sapiens OX=9606 GN=INPP5A PE=1 SV=1|Inositol polyphosphate-5-phosphatase A OS=Homo sapiens OX=9606 GN=INPP5A PE=1 SV=1	58397.8|54196.4	6	6.84861	-0.109659	27.063	-0.990792	0.342307	0.999947	-4.64646	CA	no_hit
SSR3	C9JA28|Q9UNL2|Q9UNL2-2	Translocon-associated protein subunit gamma OS=Homo sapiens OX=9606 GN=SSR3 PE=1 SV=1|Translocon-associated protein subunit gamma OS=Homo sapiens OX=9606 GN=SSR3 PE=1 SV=1|Isoform 2 of Translocon-associated protein subunit gamma OS=Homo sapiens OX=9606 GN=SSR3	25072.9|26238.7|28432.9	5	8.37719	-0.125162	28.565	-0.990607	0.342393	0.999947	-4.64653	CA	no_hit
SEC61B	P60468	Protein transport protein Sec61 subunit beta OS=Homo sapiens OX=9606 GN=SEC61B PE=1 SV=2	11242	4	7.76417	-0.173506	27.7493	-0.989908	0.34272	0.999947	-4.64679	CA	no_hit
KLC2	Q9H0B6	Kinesin light chain 2 OS=Homo sapiens OX=9606 GN=KLC2 PE=1 SV=1	82372.3	16	7.598	0.188972	29.2215	0.989722	0.342808	0.999947	-4.64685	CA	no_hit
DSC1	Q08554-2	Isoform 1B of Desmocollin-1 OS=Homo sapiens OX=9606 GN=DSC1	109823	12	7.21791	-0.550533	27.0782	-0.989557	0.342885	0.999947	-4.64691	CA	no_hit
NME7	Q9Y5B8|Q9Y5B8-2	Nucleoside diphosphate kinase 7 OS=Homo sapiens OX=9606 GN=NME7 PE=1 SV=1|Isoform 2 of Nucleoside diphosphate kinase 7 OS=Homo sapiens OX=9606 GN=NME7|Nucleoside diphosphate kinase 7 OS=Homo sapiens OX=9606 GN=NME7 PE=1 SV=1	49308.8|45006.8	6	6.89378	-0.0920107	26.6291	-0.989451	0.342934	0.999947	-4.64695	CA	no_hit
KIFC1	Q9BW19	Kinesin-like protein KIFC1 OS=Homo sapiens OX=9606 GN=KIFC1 PE=1 SV=2	84311.3	10	6.96303	0.129659	27.1471	0.989394	0.342961	0.999947	-4.64697	CA	no_hit
MIER1	Q8N108|Q8N108-12|Q8N108-13|Q8N108-14|Q8N108-15|Q8N108-16|Q8N108-17|Q8N108-18	Mesoderm induction early response protein 1 OS=Homo sapiens OX=9606 GN=MIER1 PE=1 SV=2|Isoform 2 of Mesoderm induction early response protein 1 OS=Homo sapiens OX=9606 GN=MIER1|Isoform 3 of Mesoderm induction early response protein 1 OS=Homo sapiens OX=9606 GN=MIER1|Isoform 4 of Mesoderm induction early response protein 1 OS=Homo sapiens OX=9606 GN=MIER1|Isoform 5 of Mesoderm induction early resp…	67720.2|73521.0|70034.3|58720.6|62207.3|56406.5|65030.2|61486.1	4	6.61216	0.106815	25.9132	0.98925	0.343028	0.999947	-4.64703	CA	no_hit
KIF11	P52732	Kinesin-like protein KIF11 OS=Homo sapiens OX=9606 GN=KIF11 PE=1 SV=2	147490	32	7.74062	-0.109523	30.234	-0.988844	0.343219	0.999947	-4.64717	CA	no_hit
USP19	O94966-5|O94966-6|O94966-7|E7ESU0|O94966-4	Isoform 5 of Ubiquitin carboxyl-terminal hydrolase 19 OS=Homo sapiens OX=9606 GN=USP19|Isoform 6 of Ubiquitin carboxyl-terminal hydrolase 19 OS=Homo sapiens OX=9606 GN=USP19|Isoform 7 of Ubiquitin carboxyl-terminal hydrolase 19 OS=Homo sapiens OX=9606 GN=USP19|Ubiquitin carboxyl-terminal hydrolase 19 (Fragment) OS=Homo sapiens OX=9606 GN=USP19 PE=1 SV=2|Isoform 4 of Ubiquitin carboxyl-terminal hy…	178011.0|173847.0|172581.0|149441.0|160259.0	9	6.77822	-0.099005	26.2221	-0.9885	0.34338	0.999947	-4.6473	CA	no_hit
PPP1CA	P62136	Serine/threonine-protein phosphatase PP1-alpha catalytic subunit OS=Homo sapiens OX=9606 GN=PPP1CA PE=1 SV=1	44921.6	4	7.92246	0.0928643	27.7924	0.988208	0.343517	0.999947	-4.64741	CA	no_hit
PITPNB	P48739|P48739-2|P48739-3	Phosphatidylinositol transfer protein beta isoform OS=Homo sapiens OX=9606 GN=PITPNB PE=1 SV=2|Isoform 2 of Phosphatidylinositol transfer protein beta isoform OS=Homo sapiens OX=9606 GN=PITPNB|Isoform 3 of Phosphatidylinositol transfer protein beta isoform OS=Homo sapiens OX=9606 GN=PITPNB	40018.6|39812.4|40235.6	12	7.71581	-0.109222	29.3265	-0.987051	0.34406	0.999947	-4.64783	CA	no_hit
ARCN1	B0YIW6|P48444	Coatomer subunit delta OS=Homo sapiens OX=9606 GN=ARCN1 PE=1 SV=1|Coatomer subunit delta OS=Homo sapiens OX=9606 GN=ARCN1 PE=1 SV=1	74021.6|69190.2	26	8.43637	-0.0998368	31.0142	-0.987027	0.344071	0.999947	-4.64783	CA	no_hit
RAP1GAP	J3KPC5|P47736|P47736-2|P47736-3|P47736-4|X6R8W7	RAP1, GTPase activating protein 1, isoform CRA_e OS=Homo sapiens OX=9606 GN=RAP1GAP PE=1 SV=1|Rap1 GTPase-activating protein 1 OS=Homo sapiens OX=9606 GN=RAP1GAP PE=1 SV=2|Isoform 2 of Rap1 GTPase-activating protein 1 OS=Homo sapiens OX=9606 GN=RAP1GAP|Isoform 3 of Rap1 GTPase-activating protein 1 OS=Homo sapiens OX=9606 GN=RAP1GAP|Isoform 4 of Rap1 GTPase-activating protein 1 OS=Homo sapiens OX=…	89353.6|85996.9|88125.1|89225.5|94189.1|94723.4	9	7.0044	-0.0877979	27.1277	-0.986636	0.344255	0.999947	-4.64798	CA	no_hit
CCDC134	Q9H6E4	Coiled-coil domain-containing protein 134 OS=Homo sapiens OX=9606 GN=CCDC134 PE=1 SV=1	32076.7	3	6.62167	0.109959	25.3549	0.98659	0.344277	0.999947	-4.64799	CA	no_hit
PRMT3	O60678	Protein arginine N-methyltransferase 3 OS=Homo sapiens OX=9606 GN=PRMT3 PE=1 SV=4	73325.7	11	7.67947	-0.110431	29.3243	-0.98607	0.344521	0.999947	-4.64818	CA	no_hit
KCMF1	Q9P0J7	E3 ubiquitin-protein ligase KCMF1 OS=Homo sapiens OX=9606 GN=KCMF1 PE=1 SV=2	44428.4	3	7.0809	-0.102811	26.3555	-0.986026	0.344542	0.999947	-4.6482	CA	no_hit
MRPS11	P82912|P82912-2	28S ribosomal protein S11, mitochondrial OS=Homo sapiens OX=9606 GN=MRPS11 PE=1 SV=2|Isoform 2 of 28S ribosomal protein S11, mitochondrial OS=Homo sapiens OX=9606 GN=MRPS11	24728.7|24572.6	3	6.86719	0.173387	25.9244	0.985832	0.344632	0.999947	-4.64827	CA	no_hit
CPSF1	Q10570	Cleavage and polyadenylation specificity factor subunit 1 OS=Homo sapiens OX=9606 GN=CPSF1 PE=1 SV=2	180897	25	7.68612	0.220709	29.9541	0.985639	0.344723	0.999947	-4.64834	CA	no_hit
NAT1	F5H5R8|P18440	Arylamine N-acetyltransferase 1 OS=Homo sapiens OX=9606 GN=NAT1 PE=1 SV=1|Arylamine N-acetyltransferase 1 OS=Homo sapiens OX=9606 GN=NAT1 PE=1 SV=2	47493.3|39029.6	4	6.56855	-0.142364	25.0997	-0.985474	0.344801	0.999947	-4.6484	CA	no_hit
NIBAN2	Q96TA1|Q96TA1-2	Protein Niban 2 OS=Homo sapiens OX=9606 GN=NIBAN2 PE=1 SV=3|Isoform 2 of Protein Niban 2 OS=Homo sapiens OX=9606 GN=NIBAN2	97678.8|96225.0	23	8.12364	-0.13009	30.486	-0.98498	0.345033	0.999947	-4.64858	CA	no_hit
AURKA	O14965	Aurora kinase A OS=Homo sapiens OX=9606 GN=AURKA PE=1 SV=2	55914.6	7	6.98336	0.176778	26.9745	0.984915	0.345064	0.999947	-4.6486	CA	no_hit
APP	A0A0A0MRG2|E9PG40|P05067|P05067-10|P05067-11|P05067-3|P05067-4|P05067-5|P05067-6|P05067-7|P05067-8|P05067-9	Amyloid-beta precursor protein OS=Homo sapiens OX=9606 GN=APP PE=1 SV=1|Amyloid-beta precursor protein OS=Homo sapiens OX=9606 GN=APP PE=1 SV=1|Amyloid-beta precursor protein OS=Homo sapiens OX=9606 GN=APP PE=1 SV=3|Isoform APP639 of Amyloid-beta precursor protein OS=Homo sapiens OX=9606 GN=APP|Isoform 11 of Amyloid-beta precursor protein OS=Homo sapiens OX=9606 GN=APP|Isoform L-APP677 of Amyloid…	87306.5|93197.4|100387.0|83668.0|97358.1|88955.5|90857.5|91669.1|93571.1|95753.4|97655.4|98484.9	3	6.50099	0.113309	25.013	0.984818	0.34511	0.999947	-4.64864	CA	no_hit
RHBDF2	Q6PJF5|Q6PJF5-2	Inactive rhomboid protein 2 OS=Homo sapiens OX=9606 GN=RHBDF2 PE=1 SV=2|Isoform 2 of Inactive rhomboid protein 2 OS=Homo sapiens OX=9606 GN=RHBDF2	110636.0|106362.0	5	6.96326	-0.0963857	26.3762	-0.984781	0.345127	0.999947	-4.64865	CA	no_hit
DPP3	Q9NY33	Dipeptidyl peptidase 3 OS=Homo sapiens OX=9606 GN=DPP3 PE=1 SV=2	92918.8	26	8.20849	-0.1033	30.1514	-0.984279	0.345363	0.999947	-4.64883	CA	no_hit
C12orf29	Q8N999|Q8N999-3	Uncharacterized protein C12orf29 OS=Homo sapiens OX=9606 GN=C12orf29 PE=1 SV=2|Isoform 3 of Uncharacterized protein C12orf29 OS=Homo sapiens OX=9606 GN=C12orf29|Uncharacterized protein C12orf29 OS=Homo sapiens OX=9606 GN=C12orf29 PE=1 SV=2	47219.4|43181.1	4	7.02646	-0.100473	26.4755	-0.984012	0.345489	0.999947	-4.64893	CA	no_hit
ANXA5	P08758	Annexin A5 OS=Homo sapiens OX=9606 GN=ANXA5 PE=1 SV=2	42664	22	8.9277	-0.126938	31.2435	-0.983861	0.34556	0.999947	-4.64898	CA	no_hit
CTSB	P07858	Cathepsin B OS=Homo sapiens OX=9606 GN=CTSB PE=1 SV=3	43329.3	8	8.22058	-0.157166	28.5229	-0.983432	0.345762	0.999947	-4.64914	CA	no_hit
ME2	A0A1W2PPH1|A0A1W2PQH3|P23368	Malic enzyme OS=Homo sapiens OX=9606 GN=ME2 PE=1 SV=1|Malic enzyme OS=Homo sapiens OX=9606 GN=ME2 PE=1 SV=1|NAD-dependent malic enzyme, mitochondrial OS=Homo sapiens OX=9606 GN=ME2 PE=1 SV=1|Malic enzyme OS=Homo sapiens OX=9606 GN=ME2 PE=1 SV=1|NAD-dependent malic enzyme, mitochondrial OS=Homo sapiens OX=9606 GN=ME2 PE=1 SV=1	70936.0|70857.9|76372.1	14	7.93997	0.0944236	29.5215	0.983048	0.345943	0.999947	-4.64928	CA	no_hit
FLNB	O75369-8	Isoform 8 of Filamin-B OS=Homo sapiens OX=9606 GN=FLNB	337470	121	8.85342	-0.111028	33.7521	-0.982883	0.346021	0.999947	-4.64934	CA	no_hit
ZW10	O43264	Centromere/kinetochore protein zw10 homolog OS=Homo sapiens OX=9606 GN=ZW10 PE=1 SV=3	107272	14	7.61541	-0.131606	28.6561	-0.981562	0.346644	0.999947	-4.64982	CA	no_hit
EHD1	Q9H4M9	EH domain-containing protein 1 OS=Homo sapiens OX=9606 GN=EHD1 PE=1 SV=2	74030.8	17	8.14026	-0.129889	30.0733	-0.981253	0.34679	0.999947	-4.64993	CA	no_hit
UFSP2	D6RA67|Q9NUQ7	Ufm1-specific protease 2 (Fragment) OS=Homo sapiens OX=9606 GN=UFSP2 PE=1 SV=1|Ufm1-specific protease 2 OS=Homo sapiens OX=9606 GN=UFSP2 PE=1 SV=3	17577.8|62144.1	8	7.42678	-0.116063	28.0486	-0.980935	0.34694	0.999947	-4.65004	CA	no_hit
KRI1	A0A494C108|Q8N9T8	Protein KRI1 homolog OS=Homo sapiens OX=9606 GN=KRI1 PE=1 SV=1|Protein KRI1 homolog OS=Homo sapiens OX=9606 GN=KRI1 PE=1 SV=3	105256.0|104602.0	8	7.06691	0.266973	28.8584	0.980874	0.346969	0.999947	-4.65006	CA	no_hit
MRPL22	E7ESL0|J3KQY1|Q9NWU5	39S ribosomal protein L22, mitochondrial OS=Homo sapiens OX=9606 GN=MRPL22 PE=1 SV=1|39S ribosomal protein L22, mitochondrial OS=Homo sapiens OX=9606 GN=MRPL22 PE=1 SV=1|39S ribosomal protein L22, mitochondrial OS=Homo sapiens OX=9606 GN=MRPL22 PE=1 SV=1	29956.8|33074.5|29272.4	9	7.48947	0.0881967	29.2418	0.979135	0.347791	0.999947	-4.65069	CA	no_hit
DSG1	Q02413	Desmoglein-1 OS=Homo sapiens OX=9606 GN=DSG1 PE=1 SV=2	125045	19	7.28497	-0.600612	27.5506	-0.979018	0.347847	0.999947	-4.65074	CA	no_hit
RPUSD4	Q96CM3	Mitochondrial RNA pseudouridine synthase RPUSD4 OS=Homo sapiens OX=9606 GN=RPUSD4 PE=1 SV=1	50791.2	3	6.60773	0.21931	25.8762	0.978731	0.347982	0.999947	-4.65084	CA	no_hit
MYL6	P60660|P60660-2	Myosin light polypeptide 6 OS=Homo sapiens OX=9606 GN=MYL6 PE=1 SV=2|Isoform Smooth muscle of Myosin light polypeptide 6 OS=Homo sapiens OX=9606 GN=MYL6|Isoform Smooth muscle of Myosin light polypeptide 6 OS=Homo sapiens OX=9606 GN=MYL6	19828.1|19859.1	8	8.26869	-0.134804	28.8926	-0.978133	0.348266	0.999947	-4.65106	CA	no_hit
MTOR	P42345	Serine/threonine-protein kinase mTOR OS=Homo sapiens OX=9606 GN=MTOR PE=1 SV=1	330306	41	7.59508	-0.107032	29.9472	-0.977853	0.348398	0.999947	-4.65116	CA	no_hit
NOL7	Q9UMY1	Nucleolar protein 7 OS=Homo sapiens OX=9606 GN=NOL7 PE=1 SV=2	39200.2	5	7.48091	0.208051	28.8132	0.976373	0.3491	0.999947	-4.65169	CA	no_hit
MTFR1L	Q9H019|Q9H019-3	Mitochondrial fission regulator 1-like OS=Homo sapiens OX=9606 GN=MTFR1L PE=1 SV=2|Isoform 3 of Mitochondrial fission regulator 1-like OS=Homo sapiens OX=9606 GN=MTFR1L	36956.6|35770.0	3	6.59391	-0.13708	23.9663	-0.975763	0.349389	0.999947	-4.65191	CA	no_hit
CYP51A1	A0A0C4DFL7|Q16850	Lanosterol 14-alpha demethylase OS=Homo sapiens OX=9606 GN=CYP51A1 PE=1 SV=1|Lanosterol 14-alpha demethylase OS=Homo sapiens OX=9606 GN=CYP51A1 PE=1 SV=3	67375.5|66903.3	10	7.70338	-0.137568	28.9739	-0.975355	0.349583	0.999947	-4.65206	CA	no_hit
METTL14	Q9HCE5	N6-adenosine-methyltransferase non-catalytic subunit OS=Homo sapiens OX=9606 GN=METTL14 PE=1 SV=2	60901.8	7	7.26867	0.108	27.5451	0.975318	0.349601	0.999947	-4.65207	CA	no_hit
FAR1	Q8WVX9	Fatty acyl-CoA reductase 1 OS=Homo sapiens OX=9606 GN=FAR1 PE=1 SV=1	68482.9	10	7.25425	-0.0974233	28.5612	-0.974226	0.35012	0.999947	-4.65246	CA	no_hit
NMI	Q13287	N-myc-interactor OS=Homo sapiens OX=9606 GN=NMI PE=1 SV=2	44940.6	14	7.31996	-0.130156	28.962	-0.973943	0.350254	0.999947	-4.65256	CA	no_hit
MMAA	A0A3B3ITP4|Q495G5|Q8IVH4	Methylmalonic aciduria type A protein, mitochondrial OS=Homo sapiens OX=9606 GN=MMAA PE=1 SV=1|MMAA protein OS=Homo sapiens OX=9606 GN=MMAA PE=1 SV=1|Methylmalonic aciduria type A protein, mitochondrial OS=Homo sapiens OX=9606 GN=MMAA PE=1 SV=1	53717.7|56935.5|56033.9	6	6.54882	0.0861656	26.2256	0.973592	0.350421	0.999947	-4.65269	CA	no_hit
CD63	F8VNT9|F8VV56|F8VWK8|F8W022|P08962|P08962-2|P08962-3	CD63 antigen (Fragment) OS=Homo sapiens OX=9606 GN=CD63 PE=1 SV=1|CD63 antigen OS=Homo sapiens OX=9606 GN=CD63 PE=1 SV=1|Tetraspanin (Fragment) OS=Homo sapiens OX=9606 GN=CD63 PE=1 SV=1|Tetraspanin (Fragment) OS=Homo sapiens OX=9606 GN=CD63 PE=1 SV=1|CD63 antigen OS=Homo sapiens OX=9606 GN=CD63 PE=1 SV=2|Isoform 2 of CD63 antigen OS=Homo sapiens OX=9606 GN=CD63|Isoform 3 of CD63 antigen OS=Homo s…	16175.6|19508.2|27742.7|27514.6|30429.1|28166.8|20757.9	2	7.84147	-0.139031	28.0898	-0.973064	0.350673	0.999947	-4.65288	CA	no_hit
GNPDA1	P46926	Glucosamine-6-phosphate isomerase 1 OS=Homo sapiens OX=9606 GN=GNPDA1 PE=1 SV=1	40423.8	9	7.89698	-0.116387	29.0622	-0.971486	0.351424	0.999947	-4.65345	CA	no_hit
FAIM	Q9NVQ4|Q9NVQ4-2|Q9NVQ4-3	Fas apoptotic inhibitory molecule 1 OS=Homo sapiens OX=9606 GN=FAIM PE=1 SV=1|Isoform 2 of Fas apoptotic inhibitory molecule 1 OS=Homo sapiens OX=9606 GN=FAIM|Isoform 3 of Fas apoptotic inhibitory molecule 1 OS=Homo sapiens OX=9606 GN=FAIM	25791.9|29976.2|28506.1	3	7.18546	-0.119033	27.1554	-0.97058	0.351857	0.999947	-4.65377	CA	no_hit
PITPNA	Q00169	Phosphatidylinositol transfer protein alpha isoform OS=Homo sapiens OX=9606 GN=PITPNA PE=1 SV=2	40531.9	12	7.8128	-0.106109	29.3011	-0.970552	0.35187	0.999947	-4.65378	CA	no_hit
TSNAX	Q99598	Translin-associated protein X OS=Homo sapiens OX=9606 GN=TSNAX PE=1 SV=1	39898.3	13	7.77706	-0.101026	29.057	-0.970229	0.352024	0.999947	-4.6539	CA	no_hit
ABT1	Q9ULW3	Activator of basal transcription 1 OS=Homo sapiens OX=9606 GN=ABT1 PE=1 SV=1	35984.4	5	6.91039	0.246197	28.1027	0.970081	0.352095	0.999947	-4.65395	CA	no_hit
YOD1	Q5VVQ6|Q5VVQ6-2	Ubiquitin thioesterase OTU1 OS=Homo sapiens OX=9606 GN=YOD1 PE=1 SV=1|Isoform 2 of Ubiquitin thioesterase OTU1 OS=Homo sapiens OX=9606 GN=YOD1	42157.7|36847.9	4	6.25657	0.201491	24.7137	0.969691	0.352281	0.999947	-4.65409	CA	no_hit
NDUFAF7	Q7L592	Protein arginine methyltransferase NDUFAF7, mitochondrial OS=Homo sapiens OX=9606 GN=NDUFAF7 PE=1 SV=1	57648.1	6	7.37882	0.0850246	27.4745	0.96934	0.352448	0.999947	-4.65422	CA	no_hit
IFRD2	A0A0R4J2F6|Q12894|Q12894-2	Interferon-related developmental regulator 2 OS=Homo sapiens OX=9606 GN=IFRD2 PE=1 SV=1|Interferon-related developmental regulator 2 OS=Homo sapiens OX=9606 GN=IFRD2 PE=1 SV=3|Isoform 2 of Interferon-related developmental regulator 2 OS=Homo sapiens OX=9606 GN=IFRD2	54786.3|61547.8|72991.0	5	6.73097	-0.0957539	27.0218	-0.969114	0.352557	0.999947	-4.6543	CA	no_hit
SMS	P52788	Spermine synthase OS=Homo sapiens OX=9606 GN=SMS PE=1 SV=2	49911.6	12	8.07755	-0.108719	29.7616	-0.968292	0.352949	0.999947	-4.65459	CA	no_hit
STEAP3	B8ZZX6|Q658P3|Q658P3-2|Q658P3-3|Q658P3-4	Metalloreductase STEAP3 OS=Homo sapiens OX=9606 GN=STEAP3 PE=1 SV=1|Metalloreductase STEAP3 OS=Homo sapiens OX=9606 GN=STEAP3 PE=1 SV=2|Isoform 2 of Metalloreductase STEAP3 OS=Homo sapiens OX=9606 GN=STEAP3|Isoform 3 of Metalloreductase STEAP3 OS=Homo sapiens OX=9606 GN=STEAP3|Isoform 4 of Metalloreductase STEAP3 OS=Homo sapiens OX=9606 GN=STEAP3	55729.4|60858.9|62213.6|60729.8|55600.3	3	7.00333	-0.121974	26.4839	-0.96754	0.353309	0.999947	-4.65486	CA	no_hit
C20orf27	Q9GZN8|Q9GZN8-2	UPF0687 protein C20orf27 OS=Homo sapiens OX=9606 GN=C20orf27 PE=1 SV=3|Isoform 2 of UPF0687 protein C20orf27 OS=Homo sapiens OX=9606 GN=C20orf27	22853.1|25566.7	5	7.29382	-0.0980833	26.6361	-0.967102	0.353519	0.999947	-4.65502	CA	no_hit
UBE3C	Q15386	Ubiquitin-protein ligase E3C OS=Homo sapiens OX=9606 GN=UBE3C PE=1 SV=3	140137	19	7.54385	-0.120757	29.1507	-0.966829	0.35365	0.999947	-4.65512	CA	no_hit
ZNF800	Q2TB10	Zinc finger protein 800 OS=Homo sapiens OX=9606 GN=ZNF800 PE=1 SV=1	101084	5	6.56756	0.279607	26.5838	0.966667	0.353727	0.999947	-4.65517	CA	no_hit
PQBP1	O60828|O60828-2	Polyglutamine-binding protein 1 OS=Homo sapiens OX=9606 GN=PQBP1 PE=1 SV=1|Isoform 2 of Polyglutamine-binding protein 1 OS=Homo sapiens OX=9606 GN=PQBP1	37203.6|37132.5	6	7.40886	0.131215	27.873	0.966352	0.353878	0.999947	-4.65529	CA	no_hit
ATP6V0A2	Q9Y487	V-type proton ATPase 116 kDa subunit a isoform 2 OS=Homo sapiens OX=9606 GN=ATP6V0A2 PE=1 SV=2	111574	7	6.99528	0.107151	27.436	0.965678	0.354201	0.999947	-4.65553	CA	no_hit
PAAF1	Q9BRP4	Proteasomal ATPase-associated factor 1 OS=Homo sapiens OX=9606 GN=PAAF1 PE=1 SV=2	47999.7	9	7.42792	-0.11986	27.8537	-0.965624	0.354227	0.999947	-4.65555	CA	no_hit
CCNDBP1	O95273	Cyclin-D1-binding protein 1 OS=Homo sapiens OX=9606 GN=CCNDBP1 PE=1 SV=2	45807.1	3	6.74998	-0.0988029	26.1858	-0.965482	0.354295	0.999947	-4.6556	CA	no_hit
PSMA3	G3V4X5|P25788|P25788-2	Proteasome endopeptidase complex OS=Homo sapiens OX=9606 GN=PSMA3 PE=1 SV=1|Proteasome subunit alpha type-3 OS=Homo sapiens OX=9606 GN=PSMA3 PE=1 SV=2|Isoform 2 of Proteasome subunit alpha type-3 OS=Homo sapiens OX=9606 GN=PSMA3|Proteasome subunit alpha type-3 OS=Homo sapiens OX=9606 GN=PSMA3 PE=1 SV=2|Isoform 2 of Proteasome subunit alpha type-3 OS=Homo sapiens OX=9606 GN=PSMA3	24400.8|34118.9|33333.6	13	8.6042	-0.11925	30.5588	-0.965282	0.354391	0.999947	-4.65567	CA	no_hit
UROS	A0A3B3ISM6|A0A3B3ITJ2|P10746|A0A3B3ISL9|A0A3B3ISX6|Q5T3L7|Q5T3L8|Q5T3L9	Uroporphyrinogen-III synthase OS=Homo sapiens OX=9606 GN=UROS PE=1 SV=1|Uroporphyrinogen-III synthase OS=Homo sapiens OX=9606 GN=UROS PE=1 SV=1|Uroporphyrinogen-III synthase OS=Homo sapiens OX=9606 GN=UROS PE=1 SV=1|Uroporphyrinogen-III synthase OS=Homo sapiens OX=9606 GN=UROS PE=1 SV=1|Uroporphyrinogen-III synthase OS=Homo sapiens OX=9606 GN=UROS PE=1 SV=1|Uroporphyrinogen-III synthase (Fragment…	38296.4|34104.0|34237.3|22232.1|18645.1|18259.8|18934.1|24819.3	4	6.84364	-0.106518	25.5072	-0.965109	0.354474	0.999947	-4.65573	CA	no_hit
R3HCC1	A0A0D9SF44|A0A0R4J2E2|Q9Y3T6|Q9Y3T6-3|E5RIK1|E5RIQ4	R3H and coiled-coil domain-containing protein 1 OS=Homo sapiens OX=9606 GN=R3HCC1 PE=1 SV=1|R3H and coiled-coil domain-containing protein 1 OS=Homo sapiens OX=9606 GN=R3HCC1 PE=1 SV=1|R3H and coiled-coil domain-containing protein 1 OS=Homo sapiens OX=9606 GN=R3HCC1 PE=1 SV=3|Isoform 2 of R3H and coiled-coil domain-containing protein 1 OS=Homo sapiens OX=9606 GN=R3HCC1|R3H and coiled-coil domain-c…	51966.9|57047.7|57065.6|51984.8|38798.0|34653.8	4	6.65878	-0.124053	25.9527	-0.964943	0.354554	0.999947	-4.65579	CA	no_hit
RAB13	P51153	Ras-related protein Rab-13 OS=Homo sapiens OX=9606 GN=RAB13 PE=1 SV=1	29984.6	11	7.97272	-0.113698	29.7393	-0.964666	0.354686	0.999947	-4.65589	CA	no_hit
HNRNPR	O43390	Heterogeneous nuclear ribonucleoprotein R OS=Homo sapiens OX=9606 GN=HNRNPR PE=1 SV=1	84569.5	17	8.2403	0.24722	31.2695	0.964117	0.35495	0.999947	-4.65609	CA	no_hit
RPRD1A	Q96P16	Regulation of nuclear pre-mRNA domain-containing protein 1A OS=Homo sapiens OX=9606 GN=RPRD1A PE=1 SV=1	44139.3	11	7.10933	0.159565	27.7911	0.962988	0.355493	0.999947	-4.65649	CA	no_hit
CNOT3	H7C3F5|O75175	CCR4-NOT transcription complex subunit 3 OS=Homo sapiens OX=9606 GN=CNOT3 PE=1 SV=2|CCR4-NOT transcription complex subunit 3 OS=Homo sapiens OX=9606 GN=CNOT3 PE=1 SV=1	63013.6|97564.3	13	7.57231	0.094157	28.9679	0.962851	0.355559	0.999947	-4.65654	CA	no_hit
ZFYVE1	G3V5N8|Q9HBF4|Q9HBF4-3	Zinc finger FYVE domain-containing protein 1 OS=Homo sapiens OX=9606 GN=ZFYVE1 PE=1 SV=1|Zinc finger FYVE domain-containing protein 1 OS=Homo sapiens OX=9606 GN=ZFYVE1 PE=1 SV=1|Isoform 3 of Zinc finger FYVE domain-containing protein 1 OS=Homo sapiens OX=9606 GN=ZFYVE1	105059.0|103451.0|101754.0	6	6.49984	-0.118857	25.8041	-0.962812	0.355577	0.999947	-4.65655	CA	no_hit
PRDX1	Q06830	Peroxiredoxin-1 OS=Homo sapiens OX=9606 GN=PRDX1 PE=1 SV=1	28104.3	7	8.51567	-0.127681	30.5694	-0.962211	0.355866	0.999947	-4.65677	CA	no_hit
TIMELESS	Q9UNS1|Q9UNS1-2	Protein timeless homolog OS=Homo sapiens OX=9606 GN=TIMELESS PE=1 SV=2|Isoform 2 of Protein timeless homolog OS=Homo sapiens OX=9606 GN=TIMELESS	160284.0|159852.0	16	7.16115	-0.101736	28.3558	-0.96209	0.355925	0.999947	-4.65681	CA	no_hit
LXN	Q9BS40	Latexin OS=Homo sapiens OX=9606 GN=LXN PE=1 SV=2	30411	3	7.26476	-0.137104	27.6514	-0.961457	0.356229	0.999947	-4.65703	CA	no_hit
CCT8	P50990	T-complex protein 1 subunit theta OS=Homo sapiens OX=9606 GN=CCT8 PE=1 SV=4	72625.2	39	8.83561	-0.117532	32.5341	-0.961443	0.356236	0.999947	-4.65704	CA	no_hit
AKR1B1	P15121	Aldo-keto reductase family 1 member B1 OS=Homo sapiens OX=9606 GN=AKR1B1 PE=1 SV=3	43834.8	20	9.18047	-0.11712	31.3313	-0.961127	0.356388	0.999947	-4.65715	CA	no_hit
ARHGEF1	M0QZR4|Q92888|Q92888-3|Q92888-2	Rho guanine nucleotide exchange factor 1 OS=Homo sapiens OX=9606 GN=ARHGEF1 PE=1 SV=1|Rho guanine nucleotide exchange factor 1 OS=Homo sapiens OX=9606 GN=ARHGEF1 PE=1 SV=2|Isoform 3 of Rho guanine nucleotide exchange factor 1 OS=Homo sapiens OX=9606 GN=ARHGEF1|Rho guanine nucleotide exchange factor 1 OS=Homo sapiens OX=9606 GN=ARHGEF1 PE=1 SV=1|Rho guanine nucleotide exchange factor 1 OS=Homo sap…	122630.0|116441.0|118070.0|111445.0	33	8.19562	-0.103035	30.6526	-0.960947	0.356475	0.999947	-4.65722	CA	no_hit
MAP2K2	P36507	Dual specificity mitogen-activated protein kinase kinase 2 OS=Homo sapiens OX=9606 GN=MAP2K2 PE=1 SV=1	51982.1	9	7.56618	-0.113872	27.9441	-0.9607	0.356594	0.999947	-4.6573	CA	no_hit
NACA	E9PAV3-2	Isoform skNAC-2 of Nascent polypeptide-associated complex subunit alpha, muscle-specific form OS=Homo sapiens OX=9606 GN=NACA	108711	5	7.90355	-0.115501	28.8917	-0.960571	0.356656	0.999947	-4.65735	CA	no_hit
MRPS35	P82673	28S ribosomal protein S35, mitochondrial OS=Homo sapiens OX=9606 GN=MRPS35 PE=1 SV=1	46232.4	6	7.44819	0.120726	27.7834	0.960356	0.35676	0.999947	-4.65743	CA	no_hit
WTAP	Q15007	Pre-mRNA-splicing regulator WTAP OS=Homo sapiens OX=9606 GN=WTAP PE=1 SV=2	51992.9	8	6.98998	0.211822	27.7825	0.960205	0.356832	0.999947	-4.65748	CA	no_hit
B4GAT1	O43505	Beta-1,4-glucuronyltransferase 1 OS=Homo sapiens OX=9606 GN=B4GAT1 PE=1 SV=1	51803.9	5	6.96058	-0.129248	26.1527	-0.960036	0.356914	0.999947	-4.65754	CA	no_hit
EWSR1	B0QYK0|Q01844|Q01844-3|Q01844-5|Q01844-6	RNA-binding protein EWS OS=Homo sapiens OX=9606 GN=EWSR1 PE=1 SV=1|RNA-binding protein EWS OS=Homo sapiens OX=9606 GN=EWSR1 PE=1 SV=1|Isoform 3 of RNA-binding protein EWS OS=Homo sapiens OX=9606 GN=EWSR1|Isoform 5 of RNA-binding protein EWS OS=Homo sapiens OX=9606 GN=EWSR1|Isoform 6 of RNA-binding protein EWS OS=Homo sapiens OX=9606 GN=EWSR1	70345.7|74196.5|74109.5|74683.8|67925.6	8	8.39675	0.125437	29.8819	0.959726	0.357063	0.999947	-4.65765	CA	no_hit
POLR2H	C9JLU1|P52434	DNA-directed RNA polymerases I, II, and III subunit RPABC3 (Fragment) OS=Homo sapiens OX=9606 GN=POLR2H PE=1 SV=8|DNA-directed RNA polymerases I, II, and III subunit RPABC3 OS=Homo sapiens OX=9606 GN=POLR2H PE=1 SV=4	19405.0|19623.1	7	7.37676	-0.100552	27.6073	-0.95927	0.357283	0.999947	-4.65781	CA	no_hit
NAA35	Q5VZE5	N-alpha-acetyltransferase 35, NatC auxiliary subunit OS=Homo sapiens OX=9606 GN=NAA35 PE=1 SV=1	101893	11	7.394	-0.114399	28.1646	-0.958734	0.357542	0.999947	-4.658	CA	no_hit
RSPRY1	Q96DX4	RING finger and SPRY domain-containing protein 1 OS=Homo sapiens OX=9606 GN=RSPRY1 PE=1 SV=1	73055.6	5	6.74673	0.103124	26.185	0.958632	0.357591	0.999947	-4.65804	CA	no_hit
CWC27	Q6UX04	Spliceosome-associated protein CWC27 homolog OS=Homo sapiens OX=9606 GN=CWC27 PE=1 SV=1	70108.2	6	7.03843	0.197028	27.2157	0.958243	0.357779	0.999947	-4.65818	CA	no_hit
SPDL1	Q96EA4	Protein Spindly OS=Homo sapiens OX=9606 GN=SPDL1 PE=1 SV=2	89615.9	17	7.24833	0.187077	28.328	0.958172	0.357813	0.999947	-4.6582	CA	no_hit
PABPC1	H0YAR2|P11940	Polyadenylate-binding protein 1 (Fragment) OS=Homo sapiens OX=9606 GN=PABPC1 PE=1 SV=1|Polyadenylate-binding protein 1 OS=Homo sapiens OX=9606 GN=PABPC1 PE=1 SV=2|Polyadenylate-binding protein 1 OS=Homo sapiens OX=9606 GN=PABPC1 PE=1 SV=2	40253.6|83326.5	19	8.77802	0.188549	31.6551	0.957126	0.358319	0.999947	-4.65857	CA	no_hit
MDH1	P40925|P40925-3	Malate dehydrogenase, cytoplasmic OS=Homo sapiens OX=9606 GN=MDH1 PE=1 SV=4|Isoform 3 of Malate dehydrogenase, cytoplasmic OS=Homo sapiens OX=9606 GN=MDH1	46061.5|49231.2	21	8.95228	-0.118992	31.4009	-0.956978	0.35839	0.999947	-4.65863	CA	no_hit
COG4	J3KNI1|Q9H9E3	Conserved oligomeric Golgi complex subunit 4 OS=Homo sapiens OX=9606 GN=COG4 PE=1 SV=1|Conserved oligomeric Golgi complex subunit 4 OS=Homo sapiens OX=9606 GN=COG4 PE=1 SV=3	105015.0|104294.0	17	7.21563	-0.105592	28.7872	-0.956508	0.358617	0.999947	-4.65879	CA	no_hit
ATRIP	A0A0U1RQR9|A0A0U1RQW3|A0A0U1RRM7|Q8WXE1|Q8WXE1-2|Q8WXE1-3	ATR-interacting protein OS=Homo sapiens OX=9606 GN=ATRIP PE=1 SV=1|ATR-interacting protein OS=Homo sapiens OX=9606 GN=ATRIP PE=1 SV=1|ATR-interacting protein (Fragment) OS=Homo sapiens OX=9606 GN=ATRIP PE=1 SV=1|ATR-interacting protein OS=Homo sapiens OX=9606 GN=ATRIP PE=1 SV=1|Isoform 2 of ATR-interacting protein OS=Homo sapiens OX=9606 GN=ATRIP|Isoform 3 of ATR-interacting protein OS=Homo sapie…	20488.5|60159.0|29753.5|98350.6|95099.9|87885.4	6	6.69718	0.0831888	26.8773	0.955833	0.358944	0.999947	-4.65903	CA	no_hit
GADD45GIP1	Q8TAE8	Growth arrest and DNA damage-inducible proteins-interacting protein 1 OS=Homo sapiens OX=9606 GN=GADD45GIP1 PE=1 SV=1	29684.1	8	7.05178	0.262161	27.4192	0.955708	0.359005	0.999947	-4.65908	CA	no_hit
LRRC40	Q9H9A6	Leucine-rich repeat-containing protein 40 OS=Homo sapiens OX=9606 GN=LRRC40 PE=1 SV=1	79367.6	18	7.36198	-0.0977391	29.1498	-0.954942	0.359376	0.999947	-4.65935	CA	no_hit
DNAJC9	Q8WXX5	DnaJ homolog subfamily C member 9 OS=Homo sapiens OX=9606 GN=DNAJC9 PE=1 SV=1	38275.8	11	7.74963	0.13261	29.3628	0.954562	0.35956	0.999947	-4.65948	CA	no_hit
PRRC2B	Q5JSZ5	Protein PRRC2B OS=Homo sapiens OX=9606 GN=PRRC2B PE=1 SV=2	284722	14	6.9317	0.106523	28.4254	0.954211	0.35973	0.999947	-4.65961	CA	no_hit
NOA1	Q8NC60	Nitric oxide-associated protein 1 OS=Homo sapiens OX=9606 GN=NOA1 PE=1 SV=2	89930.5	12	7.3391	0.108718	28.6055	0.954087	0.35979	0.999947	-4.65965	CA	no_hit
MACROH2A1	O75367|O75367-3	Core histone macro-H2A.1 OS=Homo sapiens OX=9606 GN=MACROH2A1 PE=1 SV=4|Isoform 3 of Core histone macro-H2A.1 OS=Homo sapiens OX=9606 GN=MACROH2A1	54365.5|53933.2	13	8.38559	0.202179	30.672	0.954085	0.359791	0.999947	-4.65965	CA	no_hit
PLXND1	Q9Y4D7|Q9Y4D7-2	Plexin-D1 OS=Homo sapiens OX=9606 GN=PLXND1 PE=1 SV=3|Isoform 2 of Plexin-D1 OS=Homo sapiens OX=9606 GN=PLXND1	238108.0|218210.0	4	6.60797	0.137782	25.6683	0.953996	0.359834	0.999947	-4.65968	CA	no_hit
TBC1D4	O60343|O60343-2|O60343-3	TBC1 domain family member 4 OS=Homo sapiens OX=9606 GN=TBC1D4 PE=1 SV=2|Isoform 2 of TBC1 domain family member 4 OS=Homo sapiens OX=9606 GN=TBC1D4|Isoform 3 of TBC1 domain family member 4 OS=Homo sapiens OX=9606 GN=TBC1D4	172100.0|164488.0|171226.0	15	7.02616	-0.110585	28.4177	-0.953737	0.359959	0.999947	-4.65978	CA	no_hit
TPI1	P60174|P60174-1	Triosephosphate isomerase OS=Homo sapiens OX=9606 GN=TPI1 PE=1 SV=3|Isoform 2 of Triosephosphate isomerase OS=Homo sapiens OX=9606 GN=TPI1	37140.9|33022.0	17	9.25749	-0.113445	31.3979	-0.95367	0.359992	0.999947	-4.6598	CA	no_hit
GAR1	Q9NY12|Q9NY12-2	H/ACA ribonucleoprotein complex subunit 1 OS=Homo sapiens OX=9606 GN=GAR1 PE=1 SV=1|Isoform 2 of H/ACA ribonucleoprotein complex subunit 1 OS=Homo sapiens OX=9606 GN=GAR1|H/ACA ribonucleoprotein complex subunit 1 OS=Homo sapiens OX=9606 GN=GAR1 PE=1 SV=1	26155.7|24642.9	4	7.36372	0.34221	28.5467	0.952999	0.360318	0.999947	-4.66004	CA	no_hit
RPL23A	A8MUS3|P62750	60S ribosomal protein L23a OS=Homo sapiens OX=9606 GN=RPL23A PE=1 SV=1|60S ribosomal protein L23a OS=Homo sapiens OX=9606 GN=RPL23A PE=1 SV=1	30534.3|26810.3	11	8.53172	0.255527	31.7296	0.952648	0.360488	0.999947	-4.66016	CA	no_hit
CDK5	Q00535	Cyclin-dependent-like kinase 5 OS=Homo sapiens OX=9606 GN=CDK5 PE=1 SV=3	40736.1	10	7.47119	-0.091673	28.182	-0.952356	0.36063	0.999947	-4.66026	CA	no_hit
CDC27	G5EA36|P30260|P30260-2	Cell division cycle 27, isoform CRA_c OS=Homo sapiens OX=9606 GN=CDC27 PE=1 SV=1|Cell division cycle protein 27 homolog OS=Homo sapiens OX=9606 GN=CDC27 PE=1 SV=2|Isoform 2 of Cell division cycle protein 27 homolog OS=Homo sapiens OX=9606 GN=CDC27|Cell division cycle protein 27 homolog OS=Homo sapiens OX=9606 GN=CDC27 PE=1 SV=2|Isoform 2 of Cell division cycle protein 27 homolog OS=Homo sapiens O…	110712.0|110841.0|111585.0	21	7.67495	0.100673	30.0971	0.951984	0.36081	0.999947	-4.6604	CA	no_hit
PEBP1	P30086	Phosphatidylethanolamine-binding protein 1 OS=Homo sapiens OX=9606 GN=PEBP1 PE=1 SV=3	25720.8	10	8.37525	-0.11667	29.4871	-0.951822	0.360889	0.999947	-4.66045	CA	no_hit
RMC1	K7ENL9|Q96DM3	Regulator of MON1-CCZ1 complex OS=Homo sapiens OX=9606 GN=RMC1 PE=1 SV=1|Regulator of MON1-CCZ1 complex OS=Homo sapiens OX=9606 GN=RMC1 PE=1 SV=2	81779.4|88140.4	4	6.62971	-0.105487	26.009	-0.951723	0.360938	0.999947	-4.66049	CA	no_hit
NUF2	E9PQC4|Q9BZD4	Kinetochore protein Nuf2 OS=Homo sapiens OX=9606 GN=NUF2 PE=1 SV=1|Kinetochore protein Nuf2 OS=Homo sapiens OX=9606 GN=NUF2 PE=1 SV=2	65152.6|72255.4	5	6.76593	-0.0895148	26.3606	-0.951641	0.360977	0.999947	-4.66052	CA	no_hit
THUMPD3	Q9BV44	THUMP domain-containing protein 3 OS=Homo sapiens OX=9606 GN=THUMPD3 PE=1 SV=1	69629.2	14	7.73072	-0.0969796	29.3788	-0.951046	0.361267	0.999947	-4.66073	CA	no_hit
ZBTB1	Q9Y2K1|Q9Y2K1-2	Zinc finger and BTB domain-containing protein 1 OS=Homo sapiens OX=9606 GN=ZBTB1 PE=1 SV=3|Isoform 2 of Zinc finger and BTB domain-containing protein 1 OS=Homo sapiens OX=9606 GN=ZBTB1	98617.5|89034.8	2	6.04359	0.195541	23.8157	0.950607	0.36148	0.999947	-4.66088	CA	no_hit
SLC9A3R2	Q15599|Q15599-2	Na(+)/H(+) exchange regulatory cofactor NHE-RF2 OS=Homo sapiens OX=9606 GN=SLC9A3R2 PE=1 SV=2|Na(+)/H(+) exchange regulatory cofactor NHE-RF2 OS=Homo sapiens OX=9606 GN=SLC9A3R2 PE=1 SV=2|Isoform 2 of Na(+)/H(+) exchange regulatory cofactor NHE-RF2 OS=Homo sapiens OX=9606 GN=SLC9A3R2	42182.2|40618.4	10	7.22458	0.161698	27.6809	0.950079	0.361737	0.999947	-4.66107	CA	no_hit
ELP3	Q9H9T3|Q9H9T3-2	Elongator complex protein 3 OS=Homo sapiens OX=9606 GN=ELP3 PE=1 SV=2|Isoform 2 of Elongator complex protein 3 OS=Homo sapiens OX=9606 GN=ELP3|Isoform 2 of Elongator complex protein 3 OS=Homo sapiens OX=9606 GN=ELP3	72523.9|70305.6	16	7.46587	-0.111556	29.1248	-0.949928	0.361811	0.999947	-4.66112	CA	no_hit
ELP5	I3L1Q3|Q8TE02|Q8TE02-4	Elongator complex protein 5 (Fragment) OS=Homo sapiens OX=9606 GN=ELP5 PE=1 SV=1|Elongator complex protein 5 OS=Homo sapiens OX=9606 GN=ELP5 PE=1 SV=2|Isoform 4 of Elongator complex protein 5 OS=Homo sapiens OX=9606 GN=ELP5	31927.6|37956.4|38806.9	4	6.7162	-0.123473	25.3661	-0.949837	0.361855	0.999947	-4.66115	CA	no_hit
TNPO3	Q9Y5L0|C9J7E5|Q9Y5L0-1	Transportin-3 OS=Homo sapiens OX=9606 GN=TNPO3 PE=1 SV=3|Transportin-3 OS=Homo sapiens OX=9606 GN=TNPO3 PE=1 SV=1|Transportin-3 OS=Homo sapiens OX=9606 GN=TNPO3 PE=1 SV=3|Isoform 1 of Transportin-3 OS=Homo sapiens OX=9606 GN=TNPO3	116608.0|121172.0|121125.0	20	7.94637	-0.117669	29.8379	-0.949409	0.362063	0.999947	-4.66131	CA	no_hit
AHSA1	O95433	Activator of 90 kDa heat shock protein ATPase homolog 1 OS=Homo sapiens OX=9606 GN=AHSA1 PE=1 SV=1	46634.9	19	8.43065	-0.104664	30.5708	-0.949336	0.362099	0.999947	-4.66133	CA	no_hit
USP47	Q96K76|Q96K76-2|Q96K76-4	Ubiquitin carboxyl-terminal hydrolase 47 OS=Homo sapiens OX=9606 GN=USP47 PE=1 SV=3|Isoform 2 of Ubiquitin carboxyl-terminal hydrolase 47 OS=Homo sapiens OX=9606 GN=USP47|Isoform 4 of Ubiquitin carboxyl-terminal hydrolase 47 OS=Homo sapiens OX=9606 GN=USP47	188393.0|176372.0|184811.0	25	7.34762	-0.0972458	29.4174	-0.949321	0.362106	0.999947	-4.66134	CA	no_hit
EIF3E	P60228|E5RIT4	Eukaryotic translation initiation factor 3 subunit E OS=Homo sapiens OX=9606 GN=EIF3E PE=1 SV=1|Eukaryotic translation initiation factor 3 subunit E (Fragment) OS=Homo sapiens OX=9606 GN=EIF3E PE=1 SV=1|Eukaryotic translation initiation factor 3 subunit E OS=Homo sapiens OX=9606 GN=EIF3E PE=1 SV=1	60495.9|10383.4	19	8.55155	-0.108679	30.9563	-0.948423	0.362543	0.999947	-4.66165	CA	no_hit
NSDHL	Q15738	Sterol-4-alpha-carboxylate 3-dehydrogenase, decarboxylating OS=Homo sapiens OX=9606 GN=NSDHL PE=1 SV=2	48242.8	18	8.35937	-0.112033	30.3785	-0.948414	0.362548	0.999947	-4.66166	CA	no_hit
UBR4	Q5T4S7|Q5T4S7-2|Q5T4S7-3|Q5T4S7-4	E3 ubiquitin-protein ligase UBR4 OS=Homo sapiens OX=9606 GN=UBR4 PE=1 SV=1|Isoform 2 of E3 ubiquitin-protein ligase UBR4 OS=Homo sapiens OX=9606 GN=UBR4|Isoform 3 of E3 ubiquitin-protein ligase UBR4 OS=Homo sapiens OX=9606 GN=UBR4|Isoform 4 of E3 ubiquitin-protein ligase UBR4 OS=Homo sapiens OX=9606 GN=UBR4	668159.0|670693.0|666475.0|668095.0	98	8.20951	-0.10046	32.0561	-0.948383	0.362563	0.999947	-4.66167	CA	no_hit
CENPV	Q7Z7K6-3	Isoform 3 of Centromere protein V OS=Homo sapiens OX=9606 GN=CENPV	36556.5	10	7.62155	0.229758	29.1692	0.948214	0.362645	0.999947	-4.66173	CA	no_hit
USP13	Q92995|Q92995-2	Ubiquitin carboxyl-terminal hydrolase 13 OS=Homo sapiens OX=9606 GN=USP13 PE=1 SV=2|Isoform 2 of Ubiquitin carboxyl-terminal hydrolase 13 OS=Homo sapiens OX=9606 GN=USP13|Ubiquitin carboxyl-terminal hydrolase 13 OS=Homo sapiens OX=9606 GN=USP13 PE=1 SV=2	111087.0|103425.0	4	6.5282	0.122046	25.2351	0.947806	0.362845	0.999947	-4.66187	CA	no_hit
LCMT1	Q9UIC8|Q9UIC8-2	Leucine carboxyl methyltransferase 1 OS=Homo sapiens OX=9606 GN=LCMT1 PE=1 SV=2|Isoform 2 of Leucine carboxyl methyltransferase 1 OS=Homo sapiens OX=9606 GN=LCMT1	44932.2|47238.8	7	7.18601	-0.110301	27.7767	-0.947652	0.36292	0.999947	-4.66193	CA	no_hit
HSD17B11	D6RCD0|Q8NBQ5	Estradiol 17-beta-dehydrogenase 11 OS=Homo sapiens OX=9606 GN=HSD17B11 PE=1 SV=2|Estradiol 17-beta-dehydrogenase 11 OS=Homo sapiens OX=9606 GN=HSD17B11 PE=1 SV=3	36031.6|41470.4	9	8.187	-0.113657	29.6658	-0.947545	0.362972	0.999947	-4.66196	CA	no_hit
YIPF5	Q969M3|Q969M3-3	Protein YIPF5 OS=Homo sapiens OX=9606 GN=YIPF5 PE=1 SV=1|Isoform 3 of Protein YIPF5 OS=Homo sapiens OX=9606 GN=YIPF5	29890.8|31065.2	2	7.51487	-0.123243	26.0761	-0.947404	0.36304	0.999947	-4.66201	CA	no_hit
PEX13	Q92968	Peroxisomal membrane protein PEX13 OS=Homo sapiens OX=9606 GN=PEX13 PE=1 SV=2	49330.8	4	6.79956	0.0866648	26.3455	0.946759	0.363355	0.999947	-4.66224	CA	no_hit
CCDC90B	E9PKQ5|Q9GZT6|Q9GZT6-2	Coiled-coil domain-containing protein 90B, mitochondrial OS=Homo sapiens OX=9606 GN=CCDC90B PE=1 SV=1|Coiled-coil domain-containing protein 90B, mitochondrial OS=Homo sapiens OX=9606 GN=CCDC90B PE=1 SV=2|Isoform 2 of Coiled-coil domain-containing protein 90B, mitochondrial OS=Homo sapiens OX=9606 GN=CCDC90B	29611.5|35019.9|33608.0	6	7.14872	-0.102382	28.2698	-0.945979	0.363736	0.999947	-4.66251	CA	no_hit
BLMH	Q13867	Bleomycin hydrolase OS=Homo sapiens OX=9606 GN=BLMH PE=1 SV=1	63194.1	16	7.94893	-0.164225	29.5358	-0.945842	0.363804	0.999947	-4.66256	CA	no_hit
TGOLN2	A0A5F9UY30|A0A5H1ZRP2|O43493|O43493-3|O43493-5|O43493-7	Trans-Golgi network integral membrane protein 2 OS=Homo sapiens OX=9606 GN=TGOLN2 PE=1 SV=1|Trans-Golgi network integral membrane protein 2 OS=Homo sapiens OX=9606 GN=TGOLN2 PE=1 SV=1|Trans-Golgi network integral membrane protein 2 OS=Homo sapiens OX=9606 GN=TGOLN2 PE=1 SV=4|Isoform TGN48 of Trans-Golgi network integral membrane protein 2 OS=Homo sapiens OX=9606 GN=TGOLN2|Isoform 5 of Trans-Golgi…	62955.9|66502.9|60758.7|62879.8|62240.5|63062.0	8	7.07231	0.138013	27.1149	0.945515	0.363963	0.999947	-4.66268	CA	no_hit
TXLNG	Q9NUQ3	Gamma-taxilin OS=Homo sapiens OX=9606 GN=TXLNG PE=1 SV=2	78401.1	6	7.15716	0.215225	27.4353	0.945426	0.364007	0.999947	-4.66271	CA	no_hit
RAB9A	P51151	Ras-related protein Rab-9A OS=Homo sapiens OX=9606 GN=RAB9A PE=1 SV=1	26758.8	7	7.03632	0.0894096	27.1119	0.94502	0.364205	0.999947	-4.66285	CA	no_hit
BCAS3	Q9H6U6|Q9H6U6-2|Q9H6U6-3|Q9H6U6-7|Q9H6U6-8	Breast carcinoma-amplified sequence 3 OS=Homo sapiens OX=9606 GN=BCAS3 PE=1 SV=3|Isoform 1 of Breast carcinoma-amplified sequence 3 OS=Homo sapiens OX=9606 GN=BCAS3|Isoform 3 of Breast carcinoma-amplified sequence 3 OS=Homo sapiens OX=9606 GN=BCAS3|Isoform 5 of Breast carcinoma-amplified sequence 3 OS=Homo sapiens OX=9606 GN=BCAS3|Isoform 4 of Breast carcinoma-amplified sequence 3 OS=Homo sapiens…	111914.0|109941.0|113031.0|114988.0|115004.0	6	6.73909	-0.110036	26.5201	-0.944048	0.364681	0.999947	-4.66319	CA	no_hit
METTL15	A6NJ78	Probable methyltransferase-like protein 15 OS=Homo sapiens OX=9606 GN=METTL15 PE=1 SV=1	53069.3	3	6.54802	0.0838323	25.494	0.944008	0.364701	0.999947	-4.66321	CA	no_hit
TRIOBP	Q9H2D6-5|Q9H2D6|Q9H2D6-2|Q9H2D6-3|Q9H2D6-7	Isoform 1 of TRIO and F-actin-binding protein OS=Homo sapiens OX=9606 GN=TRIOBP|TRIO and F-actin-binding protein OS=Homo sapiens OX=9606 GN=TRIOBP PE=1 SV=3|Isoform 3 of TRIO and F-actin-binding protein OS=Homo sapiens OX=9606 GN=TRIOBP|Isoform 4 of TRIO and F-actin-binding protein OS=Homo sapiens OX=9606 GN=TRIOBP|Isoform 1 of TRIO and F-actin-binding protein OS=Homo sapiens OX=9606 GN=TRIOBP|Is…	79045.7|282073.0|270211.0|263020.0|85714.2	11	7.35759	0.133632	28.2886	0.942825	0.36528	0.999947	-4.66362	CA	no_hit
RABGGTB	P53611	Geranylgeranyl transferase type-2 subunit beta OS=Homo sapiens OX=9606 GN=RABGGTB PE=1 SV=2	42147.7	8	7.37501	-0.0894489	27.4885	-0.942653	0.365364	0.999947	-4.66368	CA	no_hit
PGK1	P00558	Phosphoglycerate kinase 1 OS=Homo sapiens OX=9606 GN=PGK1 PE=1 SV=3	57762	25	9.06849	-0.105287	32.0396	-0.942257	0.365558	0.999947	-4.66382	CA	no_hit
STAT1	P42224	Signal transducer and activator of transcription 1-alpha/beta OS=Homo sapiens OX=9606 GN=STAT1 PE=1 SV=2	104581	28	8.11146	-0.0936087	30.7229	-0.941494	0.365933	0.999947	-4.66409	CA	no_hit
CIAO2A	Q9H5X1	Cytosolic iron-sulfur assembly component 2A OS=Homo sapiens OX=9606 GN=CIAO2A PE=1 SV=1	20758	2	7.54304	-0.120979	26.3817	-0.941279	0.366038	0.999947	-4.66417	CA	no_hit
B3GAT3	G3V150|O94766|O94766-2	Galactosylgalactosylxylosylprotein 3-beta-glucuronosyltransferase OS=Homo sapiens OX=9606 GN=B3GAT3 PE=1 SV=1|Galactosylgalactosylxylosylprotein 3-beta-glucuronosyltransferase 3 OS=Homo sapiens OX=9606 GN=B3GAT3 PE=1 SV=2|Isoform 2 of Galactosylgalactosylxylosylprotein 3-beta-glucuronosyltransferase 3 OS=Homo sapiens OX=9606 GN=B3GAT3|Galactosylgalactosylxylosylprotein 3-beta-glucuronosyltransfer…	38211.7|41224.4|37873.4	6	7.35252	0.170832	27.0817	0.941169	0.366092	0.999947	-4.6642	CA	no_hit
ATF7IP	Q6VMQ6|Q6VMQ6-2|Q6VMQ6-5|Q6VMQ6-4	Activating transcription factor 7-interacting protein 1 OS=Homo sapiens OX=9606 GN=ATF7IP PE=1 SV=3|Isoform 2 of Activating transcription factor 7-interacting protein 1 OS=Homo sapiens OX=9606 GN=ATF7IP|Isoform 4 of Activating transcription factor 7-interacting protein 1 OS=Homo sapiens OX=9606 GN=ATF7IP|Activating transcription factor 7-interacting protein 1 OS=Homo sapiens OX=9606 GN=ATF7IP PE=…	159069.0|139343.0|158998.0|160167.0	6	6.70022	0.153373	27.5056	0.94082	0.366264	0.999947	-4.66433	CA	no_hit
RAB3GAP2	Q9H2M9	Rab3 GTPase-activating protein non-catalytic subunit OS=Homo sapiens OX=9606 GN=RAB3GAP2 PE=1 SV=1	184861	28	7.58929	-0.104746	29.9925	-0.940723	0.366311	0.999947	-4.66436	CA	no_hit
TUBGCP2	Q9BSJ2|Q9BSJ2-4|Q9BSJ2-3	Gamma-tubulin complex component 2 OS=Homo sapiens OX=9606 GN=TUBGCP2 PE=1 SV=2|Isoform 3 of Gamma-tubulin complex component 2 OS=Homo sapiens OX=9606 GN=TUBGCP2|Gamma-tubulin complex component 2 OS=Homo sapiens OX=9606 GN=TUBGCP2 PE=1 SV=2|Isoform 2 of Gamma-tubulin complex component 2 OS=Homo sapiens OX=9606 GN=TUBGCP2|Isoform 3 of Gamma-tubulin complex component 2 OS=Homo sapiens OX=9606 GN=TUB…	120132.0|123642.0|102351.0	22	7.44724	-0.0949642	29.4429	-0.940722	0.366312	0.999947	-4.66436	CA	no_hit
METTL26	Q96S19|A0A087WYU2|Q96S19-3|Q96S19-5	Methyltransferase-like 26 OS=Homo sapiens OX=9606 GN=METTL26 PE=1 SV=2|Methyltransferase-like 26 OS=Homo sapiens OX=9606 GN=METTL26 PE=1 SV=1|Methyltransferase-like 26 OS=Homo sapiens OX=9606 GN=METTL26 PE=1 SV=2|Isoform 3 of Methyltransferase-like 26 OS=Homo sapiens OX=9606 GN=METTL26|Isoform 5 of Methyltransferase-like 26 OS=Homo sapiens OX=9606 GN=METTL26	24978.3|22525.8|13298.0|15331.8	6	6.81292	-0.141959	25.9289	-0.940566	0.366388	0.999947	-4.66441	CA	no_hit
NTHL1	P78549|P78549-2|P78549-3	Endonuclease III-like protein 1 OS=Homo sapiens OX=9606 GN=NTHL1 PE=1 SV=2|Isoform 2 of Endonuclease III-like protein 1 OS=Homo sapiens OX=9606 GN=NTHL1|Isoform 3 of Endonuclease III-like protein 1 OS=Homo sapiens OX=9606 GN=NTHL1	39938.5|39062.2|38331.8	4	6.69017	0.176071	26.1934	0.939993	0.36667	0.999947	-4.66462	CA	no_hit
P3H3	Q8IVL6|Q8IVL6-2	Prolyl 3-hydroxylase 3 OS=Homo sapiens OX=9606 GN=P3H3 PE=1 SV=1|Isoform 2 of Prolyl 3-hydroxylase 3 OS=Homo sapiens OX=9606 GN=P3H3|Prolyl 3-hydroxylase 3 OS=Homo sapiens OX=9606 GN=P3H3 PE=1 SV=1	87755.5|67389.5	5	6.86707	0.246336	26.1227	0.939672	0.366828	0.999947	-4.66473	CA	no_hit
HSPB8	Q9UJY1	Heat shock protein beta-8 OS=Homo sapiens OX=9606 GN=HSPB8 PE=1 SV=1	24499.6	5	7.31369	0.144407	27.4951	0.939525	0.3669	0.999947	-4.66478	CA	no_hit
MED25	B9TX31|M0QZQ2|Q71SY5|Q71SY5-2|Q71SY5-3|Q71SY5-4|Q71SY5-5|Q71SY5-6	Mediator complex subunit MED25 variant MED25_i4 OS=Homo sapiens OX=9606 GN=MED25 PE=1 SV=1|Mediator of RNA polymerase II transcription subunit 25 OS=Homo sapiens OX=9606 GN=MED25 PE=1 SV=3|Mediator of RNA polymerase II transcription subunit 25 OS=Homo sapiens OX=9606 GN=MED25 PE=1 SV=2|Isoform 2 of Mediator of RNA polymerase II transcription subunit 25 OS=Homo sapiens OX=9606 GN=MED25|Isoform 3 o…	55061.4|95863.3|85631.4|87369.1|91627.4|94697.6|83973.5|60763.4	2	6.79579	0.167503	26.1018	0.93885	0.367232	0.999947	-4.66502	CA	no_hit
SYTL2	A0A0U1RR07|Q9HCH5|Q9HCH5-13|Q9HCH5-14|Q9HCH5-15|Q9HCH5-6	Synaptotagmin-like protein 2 OS=Homo sapiens OX=9606 GN=SYTL2 PE=1 SV=1|Synaptotagmin-like protein 2 OS=Homo sapiens OX=9606 GN=SYTL2 PE=1 SV=3|Isoform 10 of Synaptotagmin-like protein 2 OS=Homo sapiens OX=9606 GN=SYTL2|Isoform 11 of Synaptotagmin-like protein 2 OS=Homo sapiens OX=9606 GN=SYTL2|Isoform 12 of Synaptotagmin-like protein 2 OS=Homo sapiens OX=9606 GN=SYTL2|Isoform 4 of Synaptotagmin-…	308861.0|131616.0|131744.0|126896.0|106787.0|129291.0	7	6.69604	0.123398	26.2855	0.938586	0.367362	0.999947	-4.66511	CA	no_hit
TOR1AIP2	Q8NFQ8	Torsin-1A-interacting protein 2 OS=Homo sapiens OX=9606 GN=TOR1AIP2 PE=1 SV=1	59978	8	7.35536	0.101135	28.4143	0.938455	0.367426	0.999947	-4.66515	CA	no_hit
GALE	Q14376	UDP-glucose 4-epimerase OS=Homo sapiens OX=9606 GN=GALE PE=1 SV=2	44132.1	9	8.04261	-0.114886	28.8298	-0.937488	0.367902	0.999947	-4.66549	CA	no_hit
INTS3	Q68E01|Q68E01-2	Integrator complex subunit 3 OS=Homo sapiens OX=9606 GN=INTS3 PE=1 SV=1|Isoform 2 of Integrator complex subunit 3 OS=Homo sapiens OX=9606 GN=INTS3|Isoform 2 of Integrator complex subunit 3 OS=Homo sapiens OX=9606 GN=INTS3	138090.0|138033.0	10	7.17786	-0.1079	27.9946	-0.937395	0.367948	0.999947	-4.66552	CA	no_hit
SEPTIN9	Q9UHD8	Septin-9 OS=Homo sapiens OX=9606 GN=SEPTIN9 PE=1 SV=2	78726.8	31	8.2907	0.0958085	30.9529	0.936686	0.368298	0.999947	-4.66577	CA	no_hit
DDX20	Q9UHI6	Probable ATP-dependent RNA helicase DDX20 OS=Homo sapiens OX=9606 GN=DDX20 PE=1 SV=2	106670	16	7.2302	0.151517	28.7709	0.936324	0.368476	0.999947	-4.6659	CA	no_hit
POLD2	A0A087WWF6|P49005|F8W8R3	DNA polymerase delta subunit 2 OS=Homo sapiens OX=9606 GN=POLD2 PE=1 SV=1|DNA polymerase delta subunit 2 OS=Homo sapiens OX=9606 GN=POLD2 PE=1 SV=1|DNA polymerase delta subunit 2 OS=Homo sapiens OX=9606 GN=POLD2 PE=1 SV=1|DNA polymerase delta subunit 2 OS=Homo sapiens OX=9606 GN=POLD2 PE=1 SV=1|DNA polymerase delta subunit 2 OS=Homo sapiens OX=9606 GN=POLD2 PE=1 SV=1	60820.8|57055.7|55018.7	11	7.17765	0.0827838	28.5641	0.936314	0.368481	0.999947	-4.6659	CA	no_hit
SELENOS	A0A182DWI4|E9PN30|Q9BQE4	Selenoprotein S OS=Homo sapiens OX=9606 GN=SELENOS PE=1 SV=1|Selenoprotein S (Fragment) OS=Homo sapiens OX=9606 GN=SELENOS PE=1 SV=1|Selenoprotein S OS=Homo sapiens OX=9606 GN=SELENOS PE=1 SV=3	23521.0|28851.6|26132.3	2	6.74059	0.161587	24.7649	0.935932	0.368669	0.999947	-4.66604	CA	no_hit
NEXN	H7BXY5|Q0ZGT2|Q0ZGT2-2|Q0ZGT2-4|Q0ZGT2-3	Nexilin (Fragment) OS=Homo sapiens OX=9606 GN=NEXN PE=1 SV=1|Nexilin OS=Homo sapiens OX=9606 GN=NEXN PE=1 SV=1|Isoform 2 of Nexilin OS=Homo sapiens OX=9606 GN=NEXN|Isoform 4 of Nexilin OS=Homo sapiens OX=9606 GN=NEXN|Nexilin (Fragment) OS=Homo sapiens OX=9606 GN=NEXN PE=1 SV=1|Nexilin OS=Homo sapiens OX=9606 GN=NEXN PE=1 SV=1|Isoform 2 of Nexilin OS=Homo sapiens OX=9606 GN=NEXN|Isoform 3 of Nexil…	89189.2|105478.0|103878.0|94818.4|95518.1	5	7.06801	0.162484	27.7426	0.935932	0.368669	0.999947	-4.66604	CA	no_hit
SAAL1	J3KND1|Q96ER3	Protein SAAL1 OS=Homo sapiens OX=9606 GN=SAAL1 PE=1 SV=1|Protein SAAL1 OS=Homo sapiens OX=9606 GN=SAAL1 PE=1 SV=2	62550.5|62649.6	6	7.49236	-0.124767	28.0016	-0.9359	0.368685	0.999947	-4.66605	CA	no_hit
DYNC2H1	Q8NCM8|Q8NCM8-2	Cytoplasmic dynein 2 heavy chain 1 OS=Homo sapiens OX=9606 GN=DYNC2H1 PE=1 SV=4|Isoform 2 of Cytoplasmic dynein 2 heavy chain 1 OS=Homo sapiens OX=9606 GN=DYNC2H1	588269.0|589370.0	21	6.75252	-0.0942968	28.2971	-0.935883	0.368694	0.999947	-4.66605	CA	no_hit
BICD2	Q8TD16|Q8TD16-2	Protein bicaudal D homolog 2 OS=Homo sapiens OX=9606 GN=BICD2 PE=1 SV=1|Isoform 2 of Protein bicaudal D homolog 2 OS=Homo sapiens OX=9606 GN=BICD2	112261.0|116063.0	22	7.34334	0.192994	28.6252	0.935279	0.368992	0.999947	-4.66626	CA	no_hit
NAA16	Q6N069	N-alpha-acetyltransferase 16, NatA auxiliary subunit OS=Homo sapiens OX=9606 GN=NAA16 PE=1 SV=2	127977	13	7.04456	-0.109296	28.6758	-0.935104	0.369078	0.999947	-4.66632	CA	no_hit
TOR4A	Q9NXH8	Torsin-4A OS=Homo sapiens OX=9606 GN=TOR4A PE=1 SV=2	50383.2	13	7.30046	0.166897	29.1834	0.934966	0.369146	0.999947	-4.66637	CA	no_hit
MIA3	Q5JRA6	Transport and Golgi organization protein 1 homolog OS=Homo sapiens OX=9606 GN=MIA3 PE=1 SV=1	259277	40	7.64772	0.0952657	30.4277	0.93477	0.369243	0.999947	-4.66644	CA	no_hit
C8orf33	A0A3B3IRR6|A0A3B3IT54|A0A3B3ITA3|Q9H7E9|Q9H7E9-2	UPF0488 protein C8orf33 OS=Homo sapiens OX=9606 GN=C8orf33 PE=1 SV=1|UPF0488 protein C8orf33 OS=Homo sapiens OX=9606 GN=C8orf33 PE=1 SV=1|UPF0488 protein C8orf33 OS=Homo sapiens OX=9606 GN=C8orf33 PE=1 SV=1|UPF0488 protein C8orf33 OS=Homo sapiens OX=9606 GN=C8orf33 PE=1 SV=1|Isoform 2 of UPF0488 protein C8orf33 OS=Homo sapiens OX=9606 GN=C8orf33	29963.3|31509.2|33399.1|30490.6|31945.3	7	7.14898	0.313058	28.0498	0.934493	0.36938	0.999947	-4.66654	CA	no_hit
RABGAP1L	Q5R372|Q5R372-3|Q5R372-4|Q5R372-2	Rab GTPase-activating protein 1-like OS=Homo sapiens OX=9606 GN=RABGAP1L PE=1 SV=1|Isoform 3 of Rab GTPase-activating protein 1-like OS=Homo sapiens OX=9606 GN=RABGAP1L|Isoform 4 of Rab GTPase-activating protein 1-like OS=Homo sapiens OX=9606 GN=RABGAP1L|Rab GTPase-activating protein 1-like OS=Homo sapiens OX=9606 GN=RABGAP1L PE=1 SV=1|Isoform 2 of Rab GTPase-activating protein 1-like OS=Homo sap…	109793.0|111281.0|108120.0|80812.4	6	6.61625	-0.101354	25.8085	-0.934188	0.36953	0.999947	-4.66664	CA	no_hit
CDCA8	Q53HL2	Borealin OS=Homo sapiens OX=9606 GN=CDCA8 PE=1 SV=2	39023.1	3	6.27058	0.279863	24.7141	0.93408	0.369584	0.999947	-4.66668	CA	no_hit
RCOR1	Q9UKL0	REST corepressor 1 OS=Homo sapiens OX=9606 GN=RCOR1 PE=1 SV=2	65577	7	7.22233	0.140224	27.5549	0.934016	0.369616	0.999947	-4.6667	CA	no_hit
PHF2	O75151	Lysine-specific demethylase PHF2 OS=Homo sapiens OX=9606 GN=PHF2 PE=1 SV=4	159087	3	6.61538	0.228379	26.0414	0.933911	0.369667	0.999947	-4.66674	CA	no_hit
IVNS1ABP	Q9Y6Y0	Influenza virus NS1A-binding protein OS=Homo sapiens OX=9606 GN=IVNS1ABP PE=1 SV=3	82976.2	10	7.31308	-0.0799188	28.7821	-0.933808	0.369718	0.999947	-4.66678	CA	no_hit
FBXO21	O94952|O94952-1	F-box only protein 21 OS=Homo sapiens OX=9606 GN=FBXO21 PE=2 SV=2|Isoform 2 of F-box only protein 21 OS=Homo sapiens OX=9606 GN=FBXO21	83478.9|82327.2	3	7.05688	-0.0876545	27.0542	-0.933533	0.369854	0.999947	-4.66687	CA	no_hit
ANP32E	Q9BTT0	Acidic leucine-rich nuclear phosphoprotein 32 family member E OS=Homo sapiens OX=9606 GN=ANP32E PE=1 SV=1	35160.8	7	7.78509	-0.113118	28.3416	-0.933157	0.37004	0.999947	-4.667	CA	no_hit
ARPP19	H3BMD8|P56211|P56211-2	cAMP-regulated phosphoprotein 19 OS=Homo sapiens OX=9606 GN=ARPP19 PE=1 SV=1|cAMP-regulated phosphoprotein 19 OS=Homo sapiens OX=9606 GN=ARPP19 PE=1 SV=2|Isoform ARPP-16 of cAMP-regulated phosphoprotein 19 OS=Homo sapiens OX=9606 GN=ARPP19	19342.7|17182.6|15191.7	3	7.24566	0.256843	26.3772	0.933119	0.370059	0.999947	-4.66702	CA	no_hit
SYT1	J3KQA0|P21579	Synaptotagmin I, isoform CRA_b OS=Homo sapiens OX=9606 GN=SYT1 PE=1 SV=1|Synaptotagmin-1 OS=Homo sapiens OX=9606 GN=SYT1 PE=1 SV=1	64304.1|64920.5	5	6.76633	-0.126643	25.8519	-0.932747	0.370243	0.999947	-4.66715	CA	no_hit
PMS2	P54278	Mismatch repair endonuclease PMS2 OS=Homo sapiens OX=9606 GN=PMS2 PE=1 SV=2	114882	7	6.76051	0.0812064	26.7868	0.932337	0.370446	0.999947	-4.66729	CA	no_hit
ASH2L	Q9UBL3|Q9UBL3-3	Set1/Ash2 histone methyltransferase complex subunit ASH2 OS=Homo sapiens OX=9606 GN=ASH2L PE=1 SV=1|Isoform 3 of Set1/Ash2 histone methyltransferase complex subunit ASH2 OS=Homo sapiens OX=9606 GN=ASH2L	83300.2|74181.9	11	7.17838	0.11067	28.5077	0.932189	0.370519	0.999947	-4.66734	CA	no_hit
EIF2B2	P49770	Translation initiation factor eIF-2B subunit beta OS=Homo sapiens OX=9606 GN=EIF2B2 PE=1 SV=3	43451.9	12	7.82091	-0.106117	29.2654	-0.932037	0.370594	0.999947	-4.66739	CA	no_hit
ACYP1	P07311	Acylphosphatase-1 OS=Homo sapiens OX=9606 GN=ACYP1 PE=1 SV=2	14295.9	5	7.12628	-0.133059	26.3151	-0.931831	0.370697	0.999947	-4.66746	CA	no_hit
MTRF1L	Q9UGC7|Q9UGC7-2|Q9UGC7-4	Peptide chain release factor 1-like, mitochondrial OS=Homo sapiens OX=9606 GN=MTRF1L PE=1 SV=1|Isoform 2 of Peptide chain release factor 1-like, mitochondrial OS=Homo sapiens OX=9606 GN=MTRF1L|Isoform 4 of Peptide chain release factor 1-like, mitochondrial OS=Homo sapiens OX=9606 GN=MTRF1L|Peptide chain release factor 1-like, mitochondrial OS=Homo sapiens OX=9606 GN=MTRF1L PE=1 SV=1	50683.6|34824.9|30086.6	4	7.8608	-0.134607	27.8063	-0.931807	0.370708	0.999947	-4.66747	CA	no_hit
CCS	J3KNF4|O14618	Copper chaperone for superoxide dismutase OS=Homo sapiens OX=9606 GN=CCS PE=1 SV=1|Copper chaperone for superoxide dismutase OS=Homo sapiens OX=9606 GN=CCS PE=1 SV=1	29655.1|31665.0	5	6.96408	-0.108196	25.8512	-0.931448	0.370886	0.999947	-4.6676	CA	no_hit
MAP2K1	Q02750	Dual specificity mitogen-activated protein kinase kinase 1 OS=Homo sapiens OX=9606 GN=MAP2K1 PE=1 SV=2	52271.2	8	7.95183	-0.0951405	28.5746	-0.931425	0.370897	0.999947	-4.66761	CA	no_hit
LLPH	Q9BRT6	Protein LLP homolog OS=Homo sapiens OX=9606 GN=LLPH PE=1 SV=1	24455.7	4	7.24231	0.211362	28.9234	0.931251	0.370984	0.999947	-4.66767	CA	no_hit
RABL6	Q3YEC7|Q3YEC7-2	Rab-like protein 6 OS=Homo sapiens OX=9606 GN=RABL6 PE=1 SV=2|Isoform 2 of Rab-like protein 6 OS=Homo sapiens OX=9606 GN=RABL6|Rab-like protein 6 OS=Homo sapiens OX=9606 GN=RABL6 PE=1 SV=2	95299.2|95386.3	10	7.3578	0.116415	28.5732	0.93122	0.370999	0.999947	-4.66768	CA	no_hit
PLCB1	Q9NQ66	1-phosphatidylinositol 4,5-bisphosphate phosphodiesterase beta-1 OS=Homo sapiens OX=9606 GN=PLCB1 PE=1 SV=1	176448	15	7.1631	-0.108075	27.7379	-0.931132	0.371043	0.999947	-4.66771	CA	no_hit
TSR3	Q9UJK0	Ribosome biogenesis protein TSR3 homolog OS=Homo sapiens OX=9606 GN=TSR3 PE=1 SV=1	37491.3	3	6.63587	0.108948	26.2226	0.931113	0.371052	0.999947	-4.66771	CA	no_hit
TMEM41B	Q5BJD5	Transmembrane protein 41B OS=Homo sapiens OX=9606 GN=TMEM41B PE=1 SV=1	38139.2	3	7.42108	-0.184931	27.3647	-0.930651	0.371281	0.999947	-4.66787	CA	no_hit
ZC3H12A	Q5D1E8	Endoribonuclease ZC3H12A OS=Homo sapiens OX=9606 GN=ZC3H12A PE=1 SV=1	74803	3	6.4066	0.139208	24.0462	0.930535	0.371339	0.999947	-4.66791	CA	no_hit
UBXN7	O94888	UBX domain-containing protein 7 OS=Homo sapiens OX=9606 GN=UBXN7 PE=1 SV=2	63136.8	7	7.13589	-0.101596	26.0679	-0.929799	0.371704	0.999947	-4.66817	CA	no_hit
RDRP	P03431	RNA-directed RNA polymerase catalytic subunit OS=Influenza A virus (strain A/Puerto Rico/8/1934 H1N1) OX=211044 GN=RDRP PE=1 SV=2	102301	35	8.90686	0.189807	33.3329	0.929725	0.37174	0.999947	-4.6682	CA	no_hit
SP100	P23497	Nuclear autoantigen Sp-100 OS=Homo sapiens OX=9606 GN=SP100 PE=1 SV=3	131611	3	6.53058	0.183501	26.3435	0.929428	0.371888	0.999947	-4.6683	CA	no_hit
ZNF281	Q9Y2X9|Q9Y2X9-2	Zinc finger protein 281 OS=Homo sapiens OX=9606 GN=ZNF281 PE=1 SV=1|Isoform 2 of Zinc finger protein 281 OS=Homo sapiens OX=9606 GN=ZNF281	115240.0|111503.0	3	6.57121	0.15768	26.8903	0.929202	0.372	0.999947	-4.66838	CA	no_hit
SCML2	Q9UQR0	Sex comb on midleg-like protein 2 OS=Homo sapiens OX=9606 GN=SCML2 PE=1 SV=1	95403	8	6.67056	0.114227	26.7761	0.929066	0.372067	0.999947	-4.66842	CA	no_hit
MLF2	Q15773	Myeloid leukemia factor 2 OS=Homo sapiens OX=9606 GN=MLF2 PE=1 SV=1	28490.4	4	7.12899	0.164851	26.9183	0.928289	0.372454	0.999947	-4.66869	CA	no_hit
MRPL23	A6NJD9|A8MVT4|A8MYK1|H7C2P7|Q16540	39S ribosomal protein L23, mitochondrial OS=Homo sapiens OX=9606 GN=MRPL23 PE=1 SV=1|39S ribosomal protein L23, mitochondrial OS=Homo sapiens OX=9606 GN=MRPL23 PE=1 SV=1|39S ribosomal protein L23, mitochondrial OS=Homo sapiens OX=9606 GN=MRPL23 PE=1 SV=1|39S ribosomal protein L23, mitochondrial (Fragment) OS=Homo sapiens OX=9606 GN=MRPL23 PE=1 SV=1|39S ribosomal protein L23, mitochondrial OS=Homo…	20267.0|21353.6|24376.4|15292.4|19291.2	2	6.69405	0.264338	25.5802	0.928255	0.37247	0.999947	-4.66871	CA	no_hit
PKP2	Q99959|Q99959-2	Plakophilin-2 OS=Homo sapiens OX=9606 GN=PKP2 PE=1 SV=2|Isoform 1 of Plakophilin-2 OS=Homo sapiens OX=9606 GN=PKP2	110645.0|105931.0	12	7.03915	0.234689	28.9785	0.927689	0.372752	0.999947	-4.6689	CA	no_hit
TERF2	Q15554	Telomeric repeat-binding factor 2 OS=Homo sapiens OX=9606 GN=TERF2 PE=1 SV=3	73417	9	7.04556	0.142455	27.6597	0.927336	0.372927	0.999947	-4.66902	CA	no_hit
GEMIN5	Q8TEQ6	Gem-associated protein 5 OS=Homo sapiens OX=9606 GN=GEMIN5 PE=1 SV=3	199112	44	7.92481	-0.100406	30.8758	-0.926999	0.373095	0.999947	-4.66914	CA	no_hit
MOCS2	O96007|O96033	Molybdopterin synthase catalytic subunit OS=Homo sapiens OX=9606 GN=MOCS2 PE=1 SV=1|Molybdopterin synthase sulfur carrier subunit OS=Homo sapiens OX=9606 GN=MOCS2 PE=1 SV=1|Molybdopterin synthase catalytic subunit OS=Homo sapiens OX=9606 GN=MOCS2 PE=1 SV=1	26026.1|10718.8	5	7.06499	-0.123481	27.1444	-0.926822	0.373183	0.999947	-4.6692	CA	no_hit
CLMN	Q96JQ2	Calmin OS=Homo sapiens OX=9606 GN=CLMN PE=1 SV=1	131203	14	7.15756	0.133512	28.5022	0.926177	0.373504	0.999947	-4.66943	CA	no_hit
TOMM5	F8W8Z9|Q8N4H5|Q8N4H5-2|Q8N4H5-3	Mitochondrial import receptor subunit TOM5 homolog OS=Homo sapiens OX=9606 GN=TOMM5 PE=1 SV=1|Mitochondrial import receptor subunit TOM5 homolog OS=Homo sapiens OX=9606 GN=TOMM5 PE=1 SV=1|Isoform 2 of Mitochondrial import receptor subunit TOM5 homolog OS=Homo sapiens OX=9606 GN=TOMM5|Isoform 3 of Mitochondrial import receptor subunit TOM5 homolog OS=Homo sapiens OX=9606 GN=TOMM5	12660.7|7552.41|11528.0|11341.2	4	8.2541	-0.116616	29.3804	-0.926018	0.373583	0.999947	-4.66948	CA	no_hit
EHD3	Q9NZN3	EH domain-containing protein 3 OS=Homo sapiens OX=9606 GN=EHD3 PE=1 SV=2	74290.9	4	6.37045	-0.116456	25.2539	-0.925577	0.373803	0.999947	-4.66963	CA	no_hit
DEGS1	O15121	Sphingolipid delta(4)-desaturase DES1 OS=Homo sapiens OX=9606 GN=DEGS1 PE=1 SV=1	42879.5	3	7.24977	-0.167352	25.8257	-0.925523	0.37383	0.999947	-4.66965	CA	no_hit
NSUN4	Q96CB9	5-methylcytosine rRNA methyltransferase NSUN4 OS=Homo sapiens OX=9606 GN=NSUN4 PE=1 SV=2	48498.6	8	7.23927	0.114391	28.9456	0.924882	0.374149	0.999947	-4.66987	CA	no_hit
NSMCE4A	Q9NXX6	Non-structural maintenance of chromosomes element 4 homolog A OS=Homo sapiens OX=9606 GN=NSMCE4A PE=1 SV=2	47734.5	6	6.81158	0.140241	27.5568	0.924187	0.374496	0.999947	-4.67011	CA	no_hit
CSRP1	P21291	Cysteine and glycine-rich protein 1 OS=Homo sapiens OX=9606 GN=CSRP1 PE=1 SV=3	28405.8	14	8.67963	-0.118294	30.1343	-0.92396	0.374609	0.999947	-4.67019	CA	no_hit
VPS35	Q96QK1	Vacuolar protein sorting-associated protein 35 OS=Homo sapiens OX=9606 GN=VPS35 PE=1 SV=2	106441	29	8.31452	-0.110367	31.013	-0.923719	0.374729	0.999947	-4.67028	CA	no_hit
CMTM4	Q8IZR5|Q8IZR5-2	CKLF-like MARVEL transmembrane domain-containing protein 4 OS=Homo sapiens OX=9606 GN=CMTM4 PE=1 SV=1|Isoform 2 of CKLF-like MARVEL transmembrane domain-containing protein 4 OS=Homo sapiens OX=9606 GN=CMTM4	27313.2|23719.2	2	6.90979	-0.0967443	26.0947	-0.923478	0.37485	0.999947	-4.67036	CA	no_hit
ZADH2	Q8N4Q0	Prostaglandin reductase 3 OS=Homo sapiens OX=9606 GN=ZADH2 PE=1 SV=1	47149.4	4	6.56315	-0.110243	24.7021	-0.923128	0.375024	0.999947	-4.67048	CA	no_hit
USP14	P54578|P54578-2	Ubiquitin carboxyl-terminal hydrolase 14 OS=Homo sapiens OX=9606 GN=USP14 PE=1 SV=3|Isoform 2 of Ubiquitin carboxyl-terminal hydrolase 14 OS=Homo sapiens OX=9606 GN=USP14	70178.5|66193.6	17	8.35323	-0.124521	30.0339	-0.923059	0.375058	0.999947	-4.6705	CA	no_hit
PML	P29590|P29590-2|P29590-3|P29590-4|P29590-5|P29590-8|P29590-9	Protein PML OS=Homo sapiens OX=9606 GN=PML PE=1 SV=3|Isoform PML-5 of Protein PML OS=Homo sapiens OX=9606 GN=PML|Isoform PML-8 of Protein PML OS=Homo sapiens OX=9606 GN=PML|Isoform PML-6 of Protein PML OS=Homo sapiens OX=9606 GN=PML|Isoform PML-4 of Protein PML OS=Homo sapiens OX=9606 GN=PML|Isoform PML-2 of Protein PML OS=Homo sapiens OX=9606 GN=PML|Isoform PML-3 of Protein PML OS=Homo sapiens O…	108269.0|75299.2|98226.6|69838.4|78154.3|98705.8|78498.9	9	7.13565	0.163079	27.7943	0.922568	0.375304	0.999947	-4.67067	CA	no_hit
VPS29	Q9UBQ0	Vacuolar protein sorting-associated protein 29 OS=Homo sapiens OX=9606 GN=VPS29 PE=1 SV=1	24618.4	8	8.38789	-0.116291	28.542	-0.921568	0.375803	0.999947	-4.67102	CA	no_hit
AKAP8L	Q9ULX6	A-kinase anchor protein 8-like OS=Homo sapiens OX=9606 GN=AKAP8L PE=1 SV=4	84219.1	11	7.3649	0.173356	28.7336	0.921376	0.3759	0.999947	-4.67108	CA	no_hit
SMYD5	Q6GMV2	SET and MYND domain-containing protein 5 OS=Homo sapiens OX=9606 GN=SMYD5 PE=1 SV=2	54344.3	8	7.50382	-0.11188	27.9106	-0.921267	0.375954	0.999947	-4.67112	CA	no_hit
DDX28	Q9NUL7	Probable ATP-dependent RNA helicase DDX28 OS=Homo sapiens OX=9606 GN=DDX28 PE=1 SV=2	65248.4	12	7.13453	0.181656	28.5027	0.921264	0.375956	0.999947	-4.67112	CA	no_hit
SBDS	A0A087X020|Q9Y3A5	Ribosome maturation protein SBDS OS=Homo sapiens OX=9606 GN=SBDS PE=1 SV=1|Ribosome maturation protein SBDS OS=Homo sapiens OX=9606 GN=SBDS PE=1 SV=4	39170.3|39069.3	13	8.06147	-0.125478	29.4164	-0.921167	0.376004	0.999947	-4.67116	CA	no_hit
BECN1	Q14457	Beclin-1 OS=Homo sapiens OX=9606 GN=BECN1 PE=1 SV=2	61198.6	5	7.04019	0.082598	27.0265	0.920647	0.376264	0.999947	-4.67134	CA	no_hit
METAP2	F8VQZ7|P50579|P50579-2|P50579-3	Methionine aminopeptidase 2 OS=Homo sapiens OX=9606 GN=METAP2 PE=1 SV=1|Methionine aminopeptidase 2 OS=Homo sapiens OX=9606 GN=METAP2 PE=1 SV=1|Isoform 2 of Methionine aminopeptidase 2 OS=Homo sapiens OX=9606 GN=METAP2|Methionine aminopeptidase 2 OS=Homo sapiens OX=9606 GN=METAP2 PE=1 SV=1|Methionine aminopeptidase 2 OS=Homo sapiens OX=9606 GN=METAP2 PE=1 SV=1|Isoform 3 of Methionine aminopeptida…	67027.5|67098.6|61980.4|64039.9	18	8.35282	-0.0986662	29.5834	-0.9202	0.376488	0.999947	-4.67149	CA	no_hit
MRM3	Q9HC36	rRNA methyltransferase 3, mitochondrial OS=Homo sapiens OX=9606 GN=MRM3 PE=1 SV=2	55793.3	6	7.25851	0.172178	28.8121	0.91926	0.376959	0.999947	-4.67181	CA	no_hit
DOCK10	A0A2R8YD85|Q96BY6|Q96BY6-3	Dedicator of cytokinesis protein 10 OS=Homo sapiens OX=9606 GN=DOCK10 PE=1 SV=1|Dedicator of cytokinesis protein 10 OS=Homo sapiens OX=9606 GN=DOCK10 PE=1 SV=3|Isoform 3 of Dedicator of cytokinesis protein 10 OS=Homo sapiens OX=9606 GN=DOCK10	303364.0|301410.0|302587.0	9	6.81477	-0.103839	26.9621	-0.919221	0.376979	0.999947	-4.67183	CA	no_hit
STK10	O94804	Serine/threonine-protein kinase 10 OS=Homo sapiens OX=9606 GN=STK10 PE=1 SV=1	140432	13	7.23612	-0.103605	29.2363	-0.919212	0.376983	0.999947	-4.67183	CA	no_hit
BAG4	O95429|O95429-2	BAG family molecular chaperone regulator 4 OS=Homo sapiens OX=9606 GN=BAG4 PE=1 SV=1|Isoform 2 of BAG family molecular chaperone regulator 4 OS=Homo sapiens OX=9606 GN=BAG4	53746.2|49564.2	3	6.86992	0.163526	26.3275	0.919115	0.377032	0.999947	-4.67186	CA	no_hit
CDR2L	Q86X02	Cerebellar degeneration-related protein 2-like OS=Homo sapiens OX=9606 GN=CDR2L PE=1 SV=2	61590.8	10	7.07247	0.150708	27.0408	0.918879	0.37715	0.999947	-4.67195	CA	no_hit
BSG	P35613|P35613-2|P35613-3	Basigin OS=Homo sapiens OX=9606 GN=BSG PE=1 SV=2|Isoform 2 of Basigin OS=Homo sapiens OX=9606 GN=BSG|Basigin OS=Homo sapiens OX=9606 GN=BSG PE=1 SV=2|Isoform 2 of Basigin OS=Homo sapiens OX=9606 GN=BSG|Isoform 3 of Basigin OS=Homo sapiens OX=9606 GN=BSG	47744.7|34298.1|22886.1	10	8.23043	-0.133755	29.2792	-0.918537	0.377321	0.999947	-4.67206	CA	no_hit
CARM1	Q86X55|Q86X55-1	Histone-arginine methyltransferase CARM1 OS=Homo sapiens OX=9606 GN=CARM1 PE=1 SV=3|Isoform 1 of Histone-arginine methyltransferase CARM1 OS=Homo sapiens OX=9606 GN=CARM1	72465.8|70073.6	11	7.595	-0.0831266	28.918	-0.91841	0.377385	0.999947	-4.67211	CA	no_hit
NUDC	Q9Y266	Nuclear migration protein nudC OS=Homo sapiens OX=9606 GN=NUDC PE=1 SV=1	48619.2	23	8.39335	-0.0939086	31.21	-0.918189	0.377496	0.999947	-4.67218	CA	no_hit
BRF1	Q92994|Q92994-5|Q92994-7|Q92994-8	Transcription factor IIIB 90 kDa subunit OS=Homo sapiens OX=9606 GN=BRF1 PE=1 SV=1|Isoform 5 of Transcription factor IIIB 90 kDa subunit OS=Homo sapiens OX=9606 GN=BRF1|Isoform 7 of Transcription factor IIIB 90 kDa subunit OS=Homo sapiens OX=9606 GN=BRF1|Isoform 8 of Transcription factor IIIB 90 kDa subunit OS=Homo sapiens OX=9606 GN=BRF1	86018.9|82691.1|72800.3|75927.0	2	7.93321	0.119814	26.7748	0.917824	0.377679	0.999947	-4.67231	CA	no_hit
GLMN	Q92990	Glomulin OS=Homo sapiens OX=9606 GN=GLMN PE=1 SV=2	83203.6	6	7.19731	-0.135831	27.2998	-0.917598	0.377793	0.999947	-4.67239	CA	no_hit
UTP3	Q9NQZ2	Something about silencing protein 10 OS=Homo sapiens OX=9606 GN=UTP3 PE=1 SV=1	69849.5	3	6.66834	0.275204	27.2206	0.917525	0.377829	0.999947	-4.67241	CA	no_hit
SCAI	Q8N9R8|Q8N9R8-2	Protein SCAI OS=Homo sapiens OX=9606 GN=SCAI PE=1 SV=2|Isoform 2 of Protein SCAI OS=Homo sapiens OX=9606 GN=SCAI	80488.7|83326.0	2	6.40533	0.166764	23.7938	0.916923	0.378131	0.999947	-4.67262	CA	no_hit
FLOT1	A2ABJ5|O75955	Flotillin (Fragment) OS=Homo sapiens OX=9606 GN=FLOT1 PE=1 SV=1|Flotillin-1 OS=Homo sapiens OX=9606 GN=FLOT1 PE=1 SV=3	19479.6|56679.9	19	7.88471	0.11604	29.9688	0.916654	0.378266	0.999947	-4.67271	CA	no_hit
RPS27A	P62979	Ubiquitin-40S ribosomal protein S27a OS=Homo sapiens OX=9606 GN=RPS27A PE=1 SV=2	25900.8	4	8.39907	0.25544	29.0266	0.916257	0.378466	0.999947	-4.67285	CA	no_hit
MRPL38	Q96DV4	39S ribosomal protein L38, mitochondrial OS=Homo sapiens OX=9606 GN=MRPL38 PE=1 SV=2	48618	16	7.89225	0.106887	29.7167	0.915933	0.378628	0.999947	-4.67296	CA	no_hit
NRDC	O43847|O43847-2	Nardilysin OS=Homo sapiens OX=9606 GN=NRDC PE=1 SV=3|Isoform 2 of Nardilysin OS=Homo sapiens OX=9606 GN=NRDC	155459.0|164080.0	17	7.71237	-0.176772	29.533	-0.91568	0.378756	0.999947	-4.67304	CA	no_hit
PA	P03433	Polymerase acidic protein OS=Influenza A virus (strain A/Puerto Rico/8/1934 H1N1) OX=211044 GN=PA PE=1 SV=2	99513.6	38	9.03987	0.162401	33.401	0.915405	0.378894	0.999947	-4.67314	CA	no_hit
HECTD1	Q9ULT8	E3 ubiquitin-protein ligase HECTD1 OS=Homo sapiens OX=9606 GN=HECTD1 PE=1 SV=3	331164	43	7.47344	-0.0995674	30.3247	-0.914758	0.37922	0.999947	-4.67336	CA	no_hit
NXF1	Q9UBU9	Nuclear RNA export factor 1 OS=Homo sapiens OX=9606 GN=NXF1 PE=1 SV=1	81907.5	15	7.49101	0.237183	29.5828	0.914203	0.379499	0.999947	-4.67355	CA	no_hit
NCAPG	Q9BPX3	Condensin complex subunit 3 OS=Homo sapiens OX=9606 GN=NCAPG PE=1 SV=1	137553	22	7.83052	-0.104842	29.7745	-0.914104	0.379549	0.999947	-4.67358	CA	no_hit
ABHD15	Q6UXT9	Protein ABHD15 OS=Homo sapiens OX=9606 GN=ABHD15 PE=1 SV=2	54419.1	4	6.98522	-0.122361	26.4985	-0.913634	0.379785	0.999947	-4.67375	CA	no_hit
WDR33	Q9C0J8	pre-mRNA 3' end processing protein WDR33 OS=Homo sapiens OX=9606 GN=WDR33 PE=1 SV=2	161713	16	7.32203	0.192152	29.6464	0.913382	0.379912	0.999947	-4.67383	CA	no_hit
AUP1	Q9Y679|Q9Y679-3	Ancient ubiquitous protein 1 OS=Homo sapiens OX=9606 GN=AUP1 PE=1 SV=2|Isoform 2 of Ancient ubiquitous protein 1 OS=Homo sapiens OX=9606 GN=AUP1|Ancient ubiquitous protein 1 OS=Homo sapiens OX=9606 GN=AUP1 PE=1 SV=2	49256.3|44305.5	8	8.03732	-0.0986702	27.9119	-0.913321	0.379943	0.999947	-4.67385	CA	no_hit
GCNT3	O95395	Beta-1,3-galactosyl-O-glycosyl-glycoprotein beta-1,6-N-acetylglucosaminyltransferase 3 OS=Homo sapiens OX=9606 GN=GCNT3 PE=2 SV=1	61915	3	6.78025	0.140372	24.8893	0.913282	0.379963	0.999947	-4.67387	CA	no_hit
PSMD2	Q13200	26S proteasome non-ATPase regulatory subunit 2 OS=Homo sapiens OX=9606 GN=PSMD2 PE=1 SV=3	116392	38	8.5713	-0.109085	31.7555	-0.912677	0.380268	0.999947	-4.67407	CA	no_hit
CHMP7	Q8WUX9	Charged multivesicular body protein 7 OS=Homo sapiens OX=9606 GN=CHMP7 PE=1 SV=1	60290.7	7	7.253	-0.0917394	27.859	-0.912511	0.380352	0.999947	-4.67413	CA	no_hit
BAG2	O95816	BAG family molecular chaperone regulator 2 OS=Homo sapiens OX=9606 GN=BAG2 PE=1 SV=1	28187.2	14	7.78886	0.15253	29.6201	0.912263	0.380477	0.999947	-4.67422	CA	no_hit
FMR1	Q06787|Q06787-3|Q06787-5|Q06787-8|Q06787-9|A8MQB8|G3V0J0|Q06787-2|Q06787-4|Q06787-6|Q06787-7	Synaptic functional regulator FMR1 OS=Homo sapiens OX=9606 GN=FMR1 PE=1 SV=1|Isoform 2 of Synaptic functional regulator FMR1 OS=Homo sapiens OX=9606 GN=FMR1|Isoform 4 of Synaptic functional regulator FMR1 OS=Homo sapiens OX=9606 GN=FMR1|Isoform 8 of Synaptic functional regulator FMR1 OS=Homo sapiens OX=9606 GN=FMR1|Isoform 9 of Synaptic functional regulator FMR1 OS=Homo sapiens OX=9606 GN=FMR1|Sy…	84249.7|83101.2|81531.6|78716.0|81434.1|77930.4|78589.5|79078.9|80746.0|79176.3|81894.5	13	7.72966	0.225579	29.1537	0.911913	0.380653	0.999947	-4.67433	CA	no_hit
IPO7	O95373|E9PLB2	Importin-7 OS=Homo sapiens OX=9606 GN=IPO7 PE=1 SV=1|Importin-7 (Fragment) OS=Homo sapiens OX=9606 GN=IPO7 PE=1 SV=8|Importin-7 OS=Homo sapiens OX=9606 GN=IPO7 PE=1 SV=1	136874.0|17337.2	20	8.48423	-0.110355	30.3903	-0.911894	0.380663	0.999947	-4.67434	CA	no_hit
NHLRC2	Q8NBF2	NHL repeat-containing protein 2 OS=Homo sapiens OX=9606 GN=NHLRC2 PE=1 SV=1	93938.1	10	7.46754	-0.111827	28.4987	-0.911532	0.380845	0.999947	-4.67447	CA	no_hit
ANKRD17	O75179|O75179-2|H0YM23|O75179-7	Ankyrin repeat domain-containing protein 17 OS=Homo sapiens OX=9606 GN=ANKRD17 PE=1 SV=3|Isoform 2 of Ankyrin repeat domain-containing protein 17 OS=Homo sapiens OX=9606 GN=ANKRD17|Ankyrin repeat domain-containing protein 17 (Fragment) OS=Homo sapiens OX=9606 GN=ANKRD17 PE=1 SV=1|Ankyrin repeat domain-containing protein 17 OS=Homo sapiens OX=9606 GN=ANKRD17 PE=1 SV=3|Isoform 2 of Ankyrin repeat d…	314604.0|314533.0|301780.0|301969.0	15	7.26244	0.0952309	28.9176	0.911518	0.380852	0.999947	-4.67447	CA	no_hit
RPAP3	Q9H6T3	RNA polymerase II-associated protein 3 OS=Homo sapiens OX=9606 GN=RPAP3 PE=1 SV=2	98772.5	22	7.50948	0.142083	30.0395	0.910967	0.381131	0.999947	-4.67466	CA	no_hit
FAM120B	A0A0D9SEJ5|F5GY05|Q96EK7	Constitutive coactivator of peroxisome proliferator-activated receptor gamma OS=Homo sapiens OX=9606 GN=FAM120B PE=1 SV=1|Constitutive coactivator of peroxisome proliferator-activated receptor gamma OS=Homo sapiens OX=9606 GN=FAM120B PE=1 SV=1|Constitutive coactivator of peroxisome proliferator-activated receptor gamma OS=Homo sapiens OX=9606 GN=FAM120B PE=1 SV=1	119949.0|121182.0|118546.0	6	6.61296	-0.103574	26.1596	-0.910867	0.381181	0.999947	-4.67469	CA	no_hit
ME3	E9PMB9|Q16798	Malic enzyme (Fragment) OS=Homo sapiens OX=9606 GN=ME3 PE=1 SV=8|NADP-dependent malic enzyme, mitochondrial OS=Homo sapiens OX=9606 GN=ME3 PE=2 SV=2	74598.2|77691.7	8	7.40104	-0.107505	28.178	-0.910708	0.381262	0.999947	-4.67475	CA	no_hit
CASC4	Q6P4E1|Q6P4E1-5|Q6P4E1-2	Protein CASC4 OS=Homo sapiens OX=9606 GN=CASC4 PE=1 SV=2|Isoform 5 of Protein CASC4 OS=Homo sapiens OX=9606 GN=CASC4|Protein CASC4 OS=Homo sapiens OX=9606 GN=CASC4 PE=1 SV=2|Isoform 2 of Protein CASC4 OS=Homo sapiens OX=9606 GN=CASC4|Isoform 5 of Protein CASC4 OS=Homo sapiens OX=9606 GN=CASC4	59012.3|56823.9|52242.3	10	7.23999	0.213992	27.4742	0.910517	0.381358	0.999947	-4.67481	CA	no_hit
ZNF217	O75362	Zinc finger protein 217 OS=Homo sapiens OX=9606 GN=ZNF217 PE=1 SV=1	144459	4	6.49435	0.101782	25.5728	0.910282	0.381476	0.999947	-4.67489	CA	no_hit
DNM1L	O00429|O00429-3|O00429-2|O00429-4	Dynamin-1-like protein OS=Homo sapiens OX=9606 GN=DNM1L PE=1 SV=2|Isoform 2 of Dynamin-1-like protein OS=Homo sapiens OX=9606 GN=DNM1L|Isoform 4 of Dynamin-1-like protein OS=Homo sapiens OX=9606 GN=DNM1L|Isoform 3 of Dynamin-1-like protein OS=Homo sapiens OX=9606 GN=DNM1L	96028.6|92986.0|94383.7|91341.1	32	8.1148	-0.118253	30.8621	-0.909961	0.381639	0.999947	-4.675	CA	no_hit
EP400	Q96L91|Q96L91-2|Q96L91-3|Q96L91-5	E1A-binding protein p400 OS=Homo sapiens OX=9606 GN=EP400 PE=1 SV=4|Isoform 2 of E1A-binding protein p400 OS=Homo sapiens OX=9606 GN=EP400|Isoform 3 of E1A-binding protein p400 OS=Homo sapiens OX=9606 GN=EP400|Isoform 5 of E1A-binding protein p400 OS=Homo sapiens OX=9606 GN=EP400	390637.0|386061.0|381741.0|385933.0	10	6.69184	0.176339	27.2485	0.909227	0.38201	0.999947	-4.67525	CA	no_hit
NARS1	K7ENF0|O43776	Asparagine--tRNA ligase, cytoplasmic OS=Homo sapiens OX=9606 GN=NARS1 PE=1 SV=1|Asparagine--tRNA ligase, cytoplasmic OS=Homo sapiens OX=9606 GN=NARS1 PE=1 SV=1	6966.69|74405.1	24	8.37205	-0.109212	30.7322	-0.90919	0.382029	0.999947	-4.67527	CA	no_hit
ARMC9	A0A2Q3DP09|Q7Z3E5|Q7Z3E5-2	LisH domain-containing protein ARMC9 OS=Homo sapiens OX=9606 GN=ARMC9 PE=1 SV=1|LisH domain-containing protein ARMC9 OS=Homo sapiens OX=9606 GN=ARMC9 PE=1 SV=3|Isoform 2 of LisH domain-containing protein ARMC9 OS=Homo sapiens OX=9606 GN=ARMC9	90284.9|108625.0|90717.2	3	6.6668	-0.0880176	24.9379	-0.908234	0.382512	0.999947	-4.67559	CA	no_hit
GABPB1	H9ZYI9|Q06547-3|Q06547-4	GA binding protein transcription factor beta subunit 1 transcript variant gamma-2 OS=Homo sapiens OX=9606 GN=GABPB1 PE=1 SV=1|Isoform 3 of GA-binding protein subunit beta-1 OS=Homo sapiens OX=9606 GN=GABPB1|Isoform 4 of GA-binding protein subunit beta-1 OS=Homo sapiens OX=9606 GN=GABPB1	40345.1|41908.9|40444.2	2	6.53716	-0.10055	24.5528	-0.908103	0.382579	0.999947	-4.67564	CA	no_hit
UNC45A	Q9H3U1|Q9H3U1-2	Protein unc-45 homolog A OS=Homo sapiens OX=9606 GN=UNC45A PE=1 SV=1|Isoform 2 of Protein unc-45 homolog A OS=Homo sapiens OX=9606 GN=UNC45A|Protein unc-45 homolog A OS=Homo sapiens OX=9606 GN=UNC45A PE=1 SV=1	122518.0|121118.0	40	8.16479	-0.107753	31.1721	-0.907767	0.382749	0.999947	-4.67575	CA	no_hit
OCLN	A0A0G2JMZ8|Q16625|Q16625-3|Q16625-4	Occludin OS=Homo sapiens OX=9606 GN=OCLN PE=1 SV=1|Occludin OS=Homo sapiens OX=9606 GN=OCLN PE=1 SV=1|Isoform 3 of Occludin OS=Homo sapiens OX=9606 GN=OCLN|Isoform 4 of Occludin OS=Homo sapiens OX=9606 GN=OCLN	68009.0|68327.2|59907.2|39605.9	6	7.00974	0.0931507	27.4518	0.905967	0.383661	0.999947	-4.67636	CA	no_hit
PSPH	C9JBI3|P78330	Phosphoserine phosphatase (Fragment) OS=Homo sapiens OX=9606 GN=PSPH PE=1 SV=1|Phosphoserine phosphatase OS=Homo sapiens OX=9606 GN=PSPH PE=1 SV=2	24553.3|29421.9	10	7.97082	-0.0973092	28.5143	-0.905889	0.383701	0.999947	-4.67639	CA	no_hit
P4HA1	P13674|P13674-2|P13674-3	Prolyl 4-hydroxylase subunit alpha-1 OS=Homo sapiens OX=9606 GN=P4HA1 PE=1 SV=2|Isoform 2 of Prolyl 4-hydroxylase subunit alpha-1 OS=Homo sapiens OX=9606 GN=P4HA1|Prolyl 4-hydroxylase subunit alpha-1 OS=Homo sapiens OX=9606 GN=P4HA1 PE=1 SV=2|Isoform 2 of Prolyl 4-hydroxylase subunit alpha-1 OS=Homo sapiens OX=9606 GN=P4HA1|Isoform 3 of Prolyl 4-hydroxylase subunit alpha-1 OS=Homo sapiens OX=9606…	74681.3|74903.4|72895.4	18	7.75436	0.0827167	29.2642	0.905593	0.383851	0.999947	-4.67649	CA	no_hit
CCT4	P50991	T-complex protein 1 subunit delta OS=Homo sapiens OX=9606 GN=CCT4 PE=1 SV=4	70265	33	8.89044	-0.105459	32.0614	-0.90438	0.384467	0.999947	-4.6769	CA	no_hit
PREP	P48147	Prolyl endopeptidase OS=Homo sapiens OX=9606 GN=PREP PE=1 SV=2	95858.1	24	7.79019	-0.0915367	29.5728	-0.904235	0.38454	0.999947	-4.67695	CA	no_hit
POLR3E	A0A0C4DH01|Q9NVU0|Q9NVU0-4|Q9NVU0-5	DNA-directed RNA polymerase III subunit RPC5 OS=Homo sapiens OX=9606 GN=POLR3E PE=1 SV=1|DNA-directed RNA polymerase III subunit RPC5 OS=Homo sapiens OX=9606 GN=POLR3E PE=1 SV=1|Isoform 4 of DNA-directed RNA polymerase III subunit RPC5 OS=Homo sapiens OX=9606 GN=POLR3E|Isoform 5 of DNA-directed RNA polymerase III subunit RPC5 OS=Homo sapiens OX=9606 GN=POLR3E|DNA-directed RNA polymerase III subun…	90707.3|95437.8|92452.1|90388.0	5	7.11468	0.113324	26.7982	0.904104	0.384607	0.999947	-4.677	CA	no_hit
TXNDC9	O14530	Thioredoxin domain-containing protein 9 OS=Homo sapiens OX=9606 GN=TXNDC9 PE=1 SV=2	34293.7	4	7.1206	-0.125213	27.0391	-0.903701	0.384812	0.999947	-4.67713	CA	no_hit
PLPP6	Q8IY26	Phospholipid phosphatase 6 OS=Homo sapiens OX=9606 GN=PLPP6 PE=1 SV=3	33979	2	6.51745	-0.199756	25.6506	-0.902006	0.385674	0.999947	-4.67771	CA	no_hit
WDR89	Q96FK6	WD repeat-containing protein 89 OS=Homo sapiens OX=9606 GN=WDR89 PE=2 SV=1	51172.4	5	6.67335	0.163378	26.6345	0.901889	0.385734	0.999947	-4.67775	CA	no_hit
MINDY3	Q9H8M7	Ubiquitin carboxyl-terminal hydrolase MINDY-3 OS=Homo sapiens OX=9606 GN=MINDY3 PE=1 SV=1	57677.8	2	6.42905	-0.105924	24.5278	-0.901358	0.386004	0.999947	-4.67793	CA	no_hit
ALG5	Q9Y673	Dolichyl-phosphate beta-glucosyltransferase OS=Homo sapiens OX=9606 GN=ALG5 PE=1 SV=1	45059.8	7	7.64285	-0.105094	27.6313	-0.90125	0.38606	0.999947	-4.67797	CA	no_hit
RPS3A	D6R9B6|P61247	40S ribosomal protein S3a OS=Homo sapiens OX=9606 GN=RPS3A PE=1 SV=1|40S ribosomal protein S3a OS=Homo sapiens OX=9606 GN=RPS3A PE=1 SV=2	22115.4|41713.7	21	8.98431	0.228513	32.652	0.90109	0.386141	0.999947	-4.67802	CA	no_hit
NEMP1	O14524|O14524-2	Nuclear envelope integral membrane protein 1 OS=Homo sapiens OX=9606 GN=NEMP1 PE=1 SV=2|Nuclear envelope integral membrane protein 1 OS=Homo sapiens OX=9606 GN=NEMP1 PE=1 SV=2|Isoform 2 of Nuclear envelope integral membrane protein 1 OS=Homo sapiens OX=9606 GN=NEMP1	58706.4|47861.3	5	6.95108	0.0919754	26.8161	0.901083	0.386144	0.999947	-4.67802	CA	no_hit
PBK	Q96KB5|Q96KB5-2	Lymphokine-activated killer T-cell-originated protein kinase OS=Homo sapiens OX=9606 GN=PBK PE=1 SV=3|Isoform 2 of Lymphokine-activated killer T-cell-originated protein kinase OS=Homo sapiens OX=9606 GN=PBK	44617.7|45743.4	13	8.07794	-0.10535	28.8476	-0.900509	0.386437	0.999947	-4.67822	CA	no_hit
FBXO7	Q9Y3I1|Q9Y3I1-2|Q9Y3I1-3	F-box only protein 7 OS=Homo sapiens OX=9606 GN=FBXO7 PE=1 SV=1|F-box only protein 7 OS=Homo sapiens OX=9606 GN=FBXO7 PE=1 SV=1|Isoform 2 of F-box only protein 7 OS=Homo sapiens OX=9606 GN=FBXO7|Isoform 3 of F-box only protein 7 OS=Homo sapiens OX=9606 GN=FBXO7	64397.8|54536.6|50961.0	5	6.74109	-0.0913566	26.4165	-0.900365	0.386511	0.999947	-4.67827	CA	no_hit
CIP2A	A0A087X211|Q8TCG1	Protein CIP2A OS=Homo sapiens OX=9606 GN=CIP2A PE=1 SV=1|Protein CIP2A OS=Homo sapiens OX=9606 GN=CIP2A PE=1 SV=2|Protein CIP2A OS=Homo sapiens OX=9606 GN=CIP2A PE=1 SV=2	123797.0|123700.0	20	7.42934	-0.10495	29.3529	-0.899954	0.38672	0.999947	-4.6784	CA	no_hit
SERBP1	Q8NC51	Plasminogen activator inhibitor 1 RNA-binding protein OS=Homo sapiens OX=9606 GN=SERBP1 PE=1 SV=2	55642.7	23	8.47411	0.231179	31.1755	0.899724	0.386837	0.999947	-4.67848	CA	no_hit
ACOT8	O14734	Acyl-coenzyme A thioesterase 8 OS=Homo sapiens OX=9606 GN=ACOT8 PE=1 SV=1	39997.7	4	6.8427	0.113258	26.373	0.899489	0.386957	0.999947	-4.67856	CA	no_hit
TFAM	Q00059	Transcription factor A, mitochondrial OS=Homo sapiens OX=9606 GN=TFAM PE=1 SV=1	38736.7	11	7.72378	0.208683	30.2247	0.899262	0.387073	0.999947	-4.67864	CA	no_hit
RABAC1	M0R3D4|Q9UI14	PRA1 family protein OS=Homo sapiens OX=9606 GN=RABAC1 PE=1 SV=1|Prenylated Rab acceptor protein 1 OS=Homo sapiens OX=9606 GN=RABAC1 PE=1 SV=1|Prenylated Rab acceptor protein 1 OS=Homo sapiens OX=9606 GN=RABAC1 PE=1 SV=1	18432.8|22022.6	4	7.30701	-0.159674	26.9055	-0.899191	0.38711	0.999947	-4.67866	CA	no_hit
E9PSI1	E9PSI1	Transmembrane 9 superfamily member OS=Homo sapiens OX=9606 PE=3 SV=1	103185	8	7.84491	-0.102565	28.2784	-0.899183	0.387114	0.999947	-4.67867	CA	no_hit
LGALS1	P09382	Galectin-1 OS=Homo sapiens OX=9606 GN=LGALS1 PE=1 SV=2	17482	9	8.66347	-0.133096	30.0387	-0.899089	0.387162	0.999947	-4.6787	CA	no_hit
RANBP10	A0A0D9SEU5|Q6VN20|Q6VN20-2|Q6VN20-3|R4GMX8	Ran-binding protein 10 OS=Homo sapiens OX=9606 GN=RANBP10 PE=1 SV=1|Ran-binding protein 10 OS=Homo sapiens OX=9606 GN=RANBP10 PE=1 SV=1|Isoform 2 of Ran-binding protein 10 OS=Homo sapiens OX=9606 GN=RANBP10|Isoform 3 of Ran-binding protein 10 OS=Homo sapiens OX=9606 GN=RANBP10|Ran-binding protein 10 OS=Homo sapiens OX=9606 GN=RANBP10 PE=1 SV=1	74761.2|74705.1|63354.1|71155.7|77931.8	5	6.65041	0.0975569	25.6672	0.898891	0.387263	0.999947	-4.67876	CA	no_hit
ATP6V1C1	P21283|E7EV59	V-type proton ATPase subunit C 1 OS=Homo sapiens OX=9606 GN=ATP6V1C1 PE=1 SV=4|V-type proton ATPase subunit C OS=Homo sapiens OX=9606 GN=ATP6V1C1 PE=1 SV=1|V-type proton ATPase subunit C 1 OS=Homo sapiens OX=9606 GN=ATP6V1C1 PE=1 SV=4	55644.9|44925.9	20	8.00408	-0.11795	30.2166	-0.898725	0.387347	0.999947	-4.67882	CA	no_hit
STAT3	P40763|P40763-3	Signal transducer and activator of transcription 3 OS=Homo sapiens OX=9606 GN=STAT3 PE=1 SV=2|Isoform 3 of Signal transducer and activator of transcription 3 OS=Homo sapiens OX=9606 GN=STAT3	103107.0|98359.5	23	7.83356	-0.0779006	29.7582	-0.898395	0.387516	0.999947	-4.67893	CA	no_hit
DRAP1	C9JCC6|Q14919|Q14919-2	Dr1-associated corepressor OS=Homo sapiens OX=9606 GN=DRAP1 PE=1 SV=1|Dr1-associated corepressor OS=Homo sapiens OX=9606 GN=DRAP1 PE=1 SV=3|Isoform 2 of Dr1-associated corepressor OS=Homo sapiens OX=9606 GN=DRAP1	29084.4|28229.9|29027.3	4	7.11212	0.182236	27.1764	0.898232	0.387599	0.999947	-4.67899	CA	no_hit
ELMOD2	D6RBS5|Q8IZ81	ELMO domain-containing protein 2 (Fragment) OS=Homo sapiens OX=9606 GN=ELMOD2 PE=1 SV=8|ELMO domain-containing protein 2 OS=Homo sapiens OX=9606 GN=ELMOD2 PE=1 SV=1|ELMO domain-containing protein 2 OS=Homo sapiens OX=9606 GN=ELMOD2 PE=1 SV=1	25781.0|43132.2	5	7.06194	-0.125848	27.2373	-0.897373	0.388038	0.999947	-4.67928	CA	no_hit
RPL6	Q02878	60S ribosomal protein L6 OS=Homo sapiens OX=9606 GN=RPL6 PE=1 SV=3	48583.4	16	8.88449	0.309646	31.4787	0.897231	0.388111	0.999947	-4.67933	CA	no_hit
DCTD	P32321|P32321-2	Deoxycytidylate deaminase OS=Homo sapiens OX=9606 GN=DCTD PE=1 SV=2|Isoform 2 of Deoxycytidylate deaminase OS=Homo sapiens OX=9606 GN=DCTD	25022.1|26076.5	3	7.15805	-0.149304	27.2486	-0.896998	0.38823	0.999947	-4.6794	CA	no_hit
OTUB1	F5GYN4|J3KR44|Q96FW1	Ubiquitin thioesterase OTUB1 OS=Homo sapiens OX=9606 GN=OTUB1 PE=1 SV=1|Ubiquitin thioesterase OS=Homo sapiens OX=9606 GN=OTUB1 PE=1 SV=2|Ubiquitin thioesterase OTUB1 OS=Homo sapiens OX=9606 GN=OTUB1 PE=1 SV=2	33071.4|36820.1|36664.0	11	8.20014	-0.110919	29.4062	-0.896937	0.388261	0.999947	-4.67942	CA	no_hit
ELOC	E5RHG8|Q15369	Elongin-C (Fragment) OS=Homo sapiens OX=9606 GN=ELOC PE=1 SV=1|Elongin-C OS=Homo sapiens OX=9606 GN=ELOC PE=1 SV=1	11893.0|14461.3	5	8.20437	-0.111898	28.4421	-0.896876	0.388292	0.999947	-4.67945	CA	no_hit
ISCU	Q9H1K1|Q9H1K1-2	Iron-sulfur cluster assembly enzyme ISCU, mitochondrial OS=Homo sapiens OX=9606 GN=ISCU PE=1 SV=2|Isoform 2 of Iron-sulfur cluster assembly enzyme ISCU, mitochondrial OS=Homo sapiens OX=9606 GN=ISCU	24299.9|20956.7	7	7.64468	0.0958422	28.2191	0.896869	0.388296	0.999947	-4.67945	CA	no_hit
COTL1	Q14019	Coactosin-like protein OS=Homo sapiens OX=9606 GN=COTL1 PE=1 SV=3	20003.8	8	8.34619	-0.11357	29.8763	-0.896852	0.388305	0.999947	-4.67945	CA	no_hit
USP22	Q9UPT9|Q9UPT9-2	Ubiquitin carboxyl-terminal hydrolase 22 OS=Homo sapiens OX=9606 GN=USP22 PE=1 SV=2|Isoform 2 of Ubiquitin carboxyl-terminal hydrolase 22 OS=Homo sapiens OX=9606 GN=USP22	72659.6|69548.9	4	6.61088	0.0829606	26.421	0.896464	0.388503	0.999947	-4.67958	CA	no_hit
MDC1	Q14676|Q14676-2|Q14676-3	Mediator of DNA damage checkpoint protein 1 OS=Homo sapiens OX=9606 GN=MDC1 PE=1 SV=3|Isoform 2 of Mediator of DNA damage checkpoint protein 1 OS=Homo sapiens OX=9606 GN=MDC1|Isoform 3 of Mediator of DNA damage checkpoint protein 1 OS=Homo sapiens OX=9606 GN=MDC1	259003.0|225218.0|224082.0	10	6.80765	0.13688	27.5421	0.896082	0.388699	0.999947	-4.67971	CA	no_hit
RMDN1	E5RH53|Q96DB5	Regulator of microtubule dynamics protein 1 OS=Homo sapiens OX=9606 GN=RMDN1 PE=1 SV=1|Regulator of microtubule dynamics protein 1 OS=Homo sapiens OX=9606 GN=RMDN1 PE=1 SV=1	36030.6|43618.6	8	7.47508	0.116381	27.6309	0.896002	0.38874	0.999947	-4.67974	CA	no_hit
SRGAP2	B7ZM87|O75044	SLIT-ROBO Rho GTPase-activating protein 2 OS=Homo sapiens OX=9606 GN=SRGAP2 PE=1 SV=1|SLIT-ROBO Rho GTPase-activating protein 2 OS=Homo sapiens OX=9606 GN=SRGAP2 PE=1 SV=3|SLIT-ROBO Rho GTPase-activating protein 2 OS=Homo sapiens OX=9606 GN=SRGAP2 PE=1 SV=1	145896.0|146024.0	9	6.68254	-0.0920739	26.2244	-0.895204	0.389148	0.999947	-4.68001	CA	no_hit
SAP18	O00422|O00422-2	Histone deacetylase complex subunit SAP18 OS=Homo sapiens OX=9606 GN=SAP18 PE=1 SV=1|Histone deacetylase complex subunit SAP18 OS=Homo sapiens OX=9606 GN=SAP18 PE=1 SV=1|Isoform 2 of Histone deacetylase complex subunit SAP18 OS=Homo sapiens OX=9606 GN=SAP18	21257.5|23525.8	9	7.90719	0.181866	29.3142	0.89498	0.389263	0.999947	-4.68008	CA	no_hit
MTFR1	H0YBZ4|H0YF01|Q15390|Q15390-2	Mitochondrial fission regulator 1 (Fragment) OS=Homo sapiens OX=9606 GN=MTFR1 PE=1 SV=1|Mitochondrial fission regulator 1 (Fragment) OS=Homo sapiens OX=9606 GN=MTFR1 PE=1 SV=1|Mitochondrial fission regulator 1 OS=Homo sapiens OX=9606 GN=MTFR1 PE=1 SV=2|Isoform 2 of Mitochondrial fission regulator 1 OS=Homo sapiens OX=9606 GN=MTFR1|Mitochondrial fission regulator 1 (Fragment) OS=Homo sapiens OX=96…	39438.5|28343.2|45362.0|40898.5	3	6.57769	0.122219	24.9304	0.894845	0.389333	0.999947	-4.68013	CA	no_hit
CSTF3	E9PLP8|Q12996	Cleavage stimulation factor subunit 3 OS=Homo sapiens OX=9606 GN=CSTF3 PE=1 SV=2|Cleavage stimulation factor subunit 3 OS=Homo sapiens OX=9606 GN=CSTF3 PE=1 SV=1|Cleavage stimulation factor subunit 3 OS=Homo sapiens OX=9606 GN=CSTF3 PE=1 SV=1	105897.0|102490.0	17	7.77082	0.128995	30.2024	0.894412	0.389554	0.999947	-4.68028	CA	no_hit
VTI1B	Q9UEU0	Vesicle transport through interaction with t-SNAREs homolog 1B OS=Homo sapiens OX=9606 GN=VTI1B PE=1 SV=3	31235	8	7.42766	0.100939	27.9494	0.894159	0.389684	0.999947	-4.68036	CA	no_hit
JMJD1C	A0A1W2PNZ9|Q15652|Q15652-3	Probable JmjC domain-containing histone demethylation protein 2C OS=Homo sapiens OX=9606 GN=JMJD1C PE=1 SV=1|Probable JmjC domain-containing histone demethylation protein 2C OS=Homo sapiens OX=9606 GN=JMJD1C PE=1 SV=2|Isoform 3 of Probable JmjC domain-containing histone demethylation protein 2C OS=Homo sapiens OX=9606 GN=JMJD1C	327030.0|351806.0|327048.0	7	6.19534	0.111092	26.1552	0.893968	0.389782	0.999947	-4.68043	CA	no_hit
RALBP1	Q15311	RalA-binding protein 1 OS=Homo sapiens OX=9606 GN=RALBP1 PE=1 SV=3	98318.3	6	6.90638	0.113788	27.3235	0.893824	0.389856	0.999947	-4.68047	CA	no_hit
SNRPC	A0A0A0MRR7|P09234	U1 small nuclear ribonucleoprotein C OS=Homo sapiens OX=9606 GN=SNRPC PE=1 SV=1|U1 small nuclear ribonucleoprotein C OS=Homo sapiens OX=9606 GN=SNRPC PE=1 SV=1	22030.9|19986.0	3	7.28207	0.292753	26.9877	0.893668	0.389936	0.999947	-4.68053	CA	no_hit
EXOC7	A0A0A0MSB8|Q9UPT5-1|Q9UPT5-6	Exocyst complex component 7 OS=Homo sapiens OX=9606 GN=EXOC7 PE=1 SV=1|Isoform 1 of Exocyst complex component 7 OS=Homo sapiens OX=9606 GN=EXOC7|Isoform 6 of Exocyst complex component 7 OS=Homo sapiens OX=9606 GN=EXOC7	96631.8|96187.8|99384.5	20	7.62612	-0.099754	29.5525	-0.893381	0.390083	0.999947	-4.68062	CA	no_hit
SPOUT1	Q5T280	Putative methyltransferase C9orf114 OS=Homo sapiens OX=9606 GN=SPOUT1 PE=1 SV=3	50405	4	7.09126	0.176941	27.5939	0.893294	0.390128	0.999947	-4.68065	CA	no_hit
FLOT2	E7EMK3|J3QLD9|Q14254	Flotillin OS=Homo sapiens OX=9606 GN=FLOT2 PE=1 SV=1|Flotillin OS=Homo sapiens OX=9606 GN=FLOT2 PE=1 SV=1|Flotillin-2 OS=Homo sapiens OX=9606 GN=FLOT2 PE=1 SV=2	65461.8|58216.1|58081.1	20	7.81804	0.146543	30.5201	0.892343	0.390616	0.999947	-4.68097	CA	no_hit
DPP7	Q9UHL4	Dipeptidyl peptidase 2 OS=Homo sapiens OX=9606 GN=DPP7 PE=1 SV=3	57501.2	10	7.47417	-0.0942728	27.3502	-0.892146	0.390717	0.999947	-4.68104	CA	no_hit
THBD	P07204	Thrombomodulin OS=Homo sapiens OX=9606 GN=THBD PE=1 SV=2	65516.9	4	7.14571	-0.0972526	26.1424	-0.891393	0.391104	0.999947	-4.68129	CA	no_hit
METTL3	Q86U44	N6-adenosine-methyltransferase catalytic subunit OS=Homo sapiens OX=9606 GN=METTL3 PE=1 SV=2	76126.2	11	7.62484	0.0861338	27.7044	0.891326	0.391139	0.999947	-4.68131	CA	no_hit
AAGAB	Q6PD74|Q6PD74-2	Alpha- and gamma-adaptin-binding protein p34 OS=Homo sapiens OX=9606 GN=AAGAB PE=1 SV=1|Isoform 2 of Alpha- and gamma-adaptin-binding protein p34 OS=Homo sapiens OX=9606 GN=AAGAB|Alpha- and gamma-adaptin-binding protein p34 OS=Homo sapiens OX=9606 GN=AAGAB PE=1 SV=1	39477.1|26222.3	3	7.15929	-0.115365	26.418	-0.890133	0.391752	0.999947	-4.68172	CA	no_hit
PPP6R3	E9PKF6|H7BXH2|Q5H9R7|Q5H9R7-2|Q5H9R7-5|Q5H9R7-6	Serine/threonine-protein phosphatase 6 regulatory subunit 3 OS=Homo sapiens OX=9606 GN=PPP6R3 PE=1 SV=1|Serine/threonine-protein phosphatase 6 regulatory subunit 3 OS=Homo sapiens OX=9606 GN=PPP6R3 PE=1 SV=1|Serine/threonine-protein phosphatase 6 regulatory subunit 3 OS=Homo sapiens OX=9606 GN=PPP6R3 PE=1 SV=2|Isoform 2 of Serine/threonine-protein phosphatase 6 regulatory subunit 3 OS=Homo sapien…	107971.0|106648.0|112266.0|111555.0|113386.0|108683.0	21	7.84566	-0.0880335	29.4199	-0.890034	0.391804	0.999947	-4.68175	CA	no_hit
HUWE1	Q7Z6Z7|Q7Z6Z7-2	E3 ubiquitin-protein ligase HUWE1 OS=Homo sapiens OX=9606 GN=HUWE1 PE=1 SV=3|Isoform 2 of E3 ubiquitin-protein ligase HUWE1 OS=Homo sapiens OX=9606 GN=HUWE1	543627.0|541935.0	90	7.98649	-0.101067	32.153	-0.889832	0.391907	0.999947	-4.68182	CA	no_hit
CIAPIN1	Q6FI81|Q6FI81-3	Anamorsin OS=Homo sapiens OX=9606 GN=CIAPIN1 PE=1 SV=2|Isoform 3 of Anamorsin OS=Homo sapiens OX=9606 GN=CIAPIN1|Anamorsin OS=Homo sapiens OX=9606 GN=CIAPIN1 PE=1 SV=2	42649.1|41033.2	10	7.81508	-0.105864	29.1212	-0.889742	0.391954	0.999947	-4.68185	CA	no_hit
SORBS3	O60504|O60504-2	Vinexin OS=Homo sapiens OX=9606 GN=SORBS3 PE=1 SV=2|Isoform Beta of Vinexin OS=Homo sapiens OX=9606 GN=SORBS3	84040.8|41149.4	8	7.12251	-0.104819	27.4046	-0.889546	0.392055	0.999947	-4.68191	CA	no_hit
ARL2BP	Q9Y2Y0|Q9Y2Y0-2|H3BU49	ADP-ribosylation factor-like protein 2-binding protein OS=Homo sapiens OX=9606 GN=ARL2BP PE=1 SV=1|Isoform 2 of ADP-ribosylation factor-like protein 2-binding protein OS=Homo sapiens OX=9606 GN=ARL2BP|ADP-ribosylation factor-like protein 2-binding protein OS=Homo sapiens OX=9606 GN=ARL2BP PE=1 SV=1|ADP-ribosylation factor-like protein 2-binding protein OS=Homo sapiens OX=9606 GN=ARL2BP PE=1 SV=1|…	20996.6|19886.1|15381.8	2	7.02681	-0.140051	26.0449	-0.889481	0.392088	0.999947	-4.68193	CA	no_hit
DTYMK	P23919	Thymidylate kinase OS=Homo sapiens OX=9606 GN=DTYMK PE=1 SV=4	28842.8	13	7.95645	-0.0881906	29.6746	-0.888927	0.392373	0.999947	-4.68212	CA	no_hit
CHTOP	Q9Y3Y2|Q9Y3Y2-3|Q9Y3Y2-4	Chromatin target of PRMT1 protein OS=Homo sapiens OX=9606 GN=CHTOP PE=1 SV=2|Isoform 2 of Chromatin target of PRMT1 protein OS=Homo sapiens OX=9606 GN=CHTOP|Isoform 3 of Chromatin target of PRMT1 protein OS=Homo sapiens OX=9606 GN=CHTOP	30030.8|30463.1|25555.3	4	7.14103	0.268923	27.8262	0.88876	0.392459	0.999947	-4.68218	CA	no_hit
SF3B6	Q9Y3B4	Splicing factor 3B subunit 6 OS=Homo sapiens OX=9606 GN=SF3B6 PE=1 SV=1	18340.1	4	7.44999	0.247857	28.1486	0.888737	0.392471	0.999947	-4.68218	CA	no_hit
RBM15B	Q8NDT2	Putative RNA-binding protein 15B OS=Homo sapiens OX=9606 GN=RBM15B PE=1 SV=3	110208	9	6.82318	0.224643	27.6388	0.888722	0.392479	0.999947	-4.68219	CA	no_hit
XPNPEP1	Q9NQW7-3	Isoform 3 of Xaa-Pro aminopeptidase 1 OS=Homo sapiens OX=9606 GN=XPNPEP1	86994.9	22	7.79542	-0.0899275	30.0776	-0.888358	0.392667	0.999947	-4.68231	CA	no_hit
THEM6	Q8WUY1	Protein THEM6 OS=Homo sapiens OX=9606 GN=THEM6 PE=1 SV=2	24439.2	8	7.78806	-0.130154	28.7167	-0.888216	0.39274	0.999947	-4.68236	CA	no_hit
HABP4	Q5JVS0|Q5JVS0-2	Intracellular hyaluronan-binding protein 4 OS=Homo sapiens OX=9606 GN=HABP4 PE=1 SV=1|Intracellular hyaluronan-binding protein 4 OS=Homo sapiens OX=9606 GN=HABP4 PE=1 SV=1|Isoform 2 of Intracellular hyaluronan-binding protein 4 OS=Homo sapiens OX=9606 GN=HABP4	51651.5|38964.3	4	7.01314	0.153633	25.8934	0.88784	0.392934	0.999947	-4.68248	CA	no_hit
NUCB1	Q02818	Nucleobindin-1 OS=Homo sapiens OX=9606 GN=NUCB1 PE=1 SV=4	62668.3	18	8.02779	0.241402	28.8002	0.887726	0.392992	0.999947	-4.68252	CA	no_hit
KPNB1	Q14974	Importin subunit beta-1 OS=Homo sapiens OX=9606 GN=KPNB1 PE=1 SV=2	111500	32	8.71621	-0.108121	31.9295	-0.887496	0.393111	0.999947	-4.6826	CA	no_hit
VPS35L	H3BNX2|Q7Z3J2|C9J7I2	VPS35 endosomal protein sorting factor-like OS=Homo sapiens OX=9606 GN=VPS35L PE=1 SV=2|VPS35 endosomal protein sorting factor-like OS=Homo sapiens OX=9606 GN=VPS35L PE=1 SV=2|VPS35 endosomal protein sorting factor-like OS=Homo sapiens OX=9606 GN=VPS35L PE=1 SV=2|VPS35 endosomal protein sorting factor-like OS=Homo sapiens OX=9606 GN=VPS35L PE=1 SV=2|VPS35 endosomal protein sorting factor-like OS=…	22300.8|130938.0|111053.0	18	7.27982	-0.107693	28.761	-0.886837	0.393451	0.999947	-4.68282	CA	no_hit
SASS6	Q6UVJ0	Spindle assembly abnormal protein 6 homolog OS=Homo sapiens OX=9606 GN=SASS6 PE=1 SV=1	95550.3	2	6.26311	-0.13095	25.7545	-0.88675	0.393496	0.999947	-4.68285	CA	no_hit
EIF3L	B0QY89|Q9Y262	Eukaryotic translation initiation factor 3 subunit L OS=Homo sapiens OX=9606 GN=EIF3L PE=1 SV=1|Eukaryotic translation initiation factor 3 subunit L OS=Homo sapiens OX=9606 GN=EIF3L PE=1 SV=1	82644.6|78168.2	22	8.50266	-0.104162	30.8672	-0.886634	0.393556	0.999947	-4.68289	CA	no_hit
RCL1	Q9Y2P8	RNA 3'-terminal phosphate cyclase-like protein OS=Homo sapiens OX=9606 GN=RCL1 PE=1 SV=3	48269.5	7	7.23935	0.190286	28.2468	0.88652	0.393615	0.999947	-4.68293	CA	no_hit
CTU2	H3BSW6|Q2VPK5|Q2VPK5-5|Q2VPK5-3	Cytoplasmic tRNA 2-thiolation protein 2 OS=Homo sapiens OX=9606 GN=CTU2 PE=1 SV=1|Cytoplasmic tRNA 2-thiolation protein 2 OS=Homo sapiens OX=9606 GN=CTU2 PE=1 SV=1|Isoform 3 of Cytoplasmic tRNA 2-thiolation protein 2 OS=Homo sapiens OX=9606 GN=CTU2|Cytoplasmic tRNA 2-thiolation protein 2 OS=Homo sapiens OX=9606 GN=CTU2 PE=1 SV=1|Cytoplasmic tRNA 2-thiolation protein 2 OS=Homo sapiens OX=9606 GN=C…	72139.5|63295.6|59600.8|51307.3	5	6.8636	0.0839763	26.3307	0.88575	0.394013	0.999947	-4.68318	CA	no_hit
TSPAN13	O95857	Tetraspanin-13 OS=Homo sapiens OX=9606 GN=TSPAN13 PE=2 SV=1	24033.6	2	6.99381	-0.210697	25.356	-0.885418	0.394184	0.999947	-4.68329	CA	no_hit
NCAPH	E9PHA2|Q15003|Q15003-2	Condensin complex subunit 2 OS=Homo sapiens OX=9606 GN=NCAPH PE=1 SV=1|Condensin complex subunit 2 OS=Homo sapiens OX=9606 GN=NCAPH PE=1 SV=3|Condensin complex subunit 2 OS=Homo sapiens OX=9606 GN=NCAPH PE=1 SV=3|Isoform 2 of Condensin complex subunit 2 OS=Homo sapiens OX=9606 GN=NCAPH	97834.7|98824.2|81883.3	17	7.67244	-0.0929223	29.2989	-0.885172	0.394311	0.999947	-4.68338	CA	no_hit
RPL14	P50914	60S ribosomal protein L14 OS=Homo sapiens OX=9606 GN=RPL14 PE=1 SV=4	34786.7	12	8.70789	0.221417	31.4125	0.88494	0.394431	0.999947	-4.68345	CA	no_hit
STARD7	Q9NQZ5	StAR-related lipid transfer protein 7, mitochondrial OS=Homo sapiens OX=9606 GN=STARD7 PE=1 SV=2	48732.5	2	6.37193	0.121773	25.0065	0.884632	0.394591	0.999947	-4.68356	CA	no_hit
PDCD10	C9J5C3|Q9BUL8	Programmed cell death protein 10 (Fragment) OS=Homo sapiens OX=9606 GN=PDCD10 PE=1 SV=1|Programmed cell death protein 10 OS=Homo sapiens OX=9606 GN=PDCD10 PE=1 SV=1	29655.3|31074.2	7	7.65876	-0.10725	28.8051	-0.884497	0.394661	0.999947	-4.6836	CA	no_hit
UPP1	Q16831	Uridine phosphorylase 1 OS=Homo sapiens OX=9606 GN=UPP1 PE=1 SV=1	40129.2	8	7.15066	-0.10199	27.203	-0.884415	0.394703	0.999947	-4.68363	CA	no_hit
MATR3	A8MXP9	Matrin-3 OS=Homo sapiens OX=9606 GN=MATR3 PE=1 SV=1	122017	38	8.4878	0.287993	32.3852	0.883933	0.394952	0.999947	-4.68379	CA	no_hit
HINT2	Q9BX68	Histidine triad nucleotide-binding protein 2, mitochondrial OS=Homo sapiens OX=9606 GN=HINT2 PE=1 SV=1	19337.7	4	7.84383	0.112403	27.3482	0.882821	0.395528	0.999947	-4.68416	CA	no_hit
NAGK	Q9UJ70|Q9UJ70-2	N-acetyl-D-glucosamine kinase OS=Homo sapiens OX=9606 GN=NAGK PE=1 SV=4|Isoform 2 of N-acetyl-D-glucosamine kinase OS=Homo sapiens OX=9606 GN=NAGK	41648.7|46365.0	9	7.6318	-0.118421	28.2739	-0.882567	0.39566	0.999947	-4.68425	CA	no_hit
PSMD4	Q5VWC4	26S proteasome non-ATPase regulatory subunit 4 OS=Homo sapiens OX=9606 GN=PSMD4 PE=1 SV=1	48582.4	9	8.09489	-0.109819	28.9917	-0.882378	0.395758	0.999947	-4.68431	CA	no_hit
RCC2	Q9P258	Protein RCC2 OS=Homo sapiens OX=9606 GN=RCC2 PE=1 SV=2	66829.3	19	8.1919	-0.083173	30.1512	-0.882181	0.39586	0.999947	-4.68437	CA	no_hit
AKT1	P31749	RAC-alpha serine/threonine-protein kinase OS=Homo sapiens OX=9606 GN=AKT1 PE=1 SV=2	67001.4	6	7.18445	-0.0985854	27.7494	-0.882072	0.395916	0.999947	-4.68441	CA	no_hit
PREX1	Q8TCU6	Phosphatidylinositol 3,4,5-trisphosphate-dependent Rac exchanger 1 protein OS=Homo sapiens OX=9606 GN=PREX1 PE=1 SV=3	218881	2	7.12307	0.112436	26.8443	0.881971	0.395969	0.999947	-4.68444	CA	no_hit
PAFAH1B2	P68402	Platelet-activating factor acetylhydrolase IB subunit beta OS=Homo sapiens OX=9606 GN=PAFAH1B2 PE=1 SV=1	29983.1	4	7.4295	-0.127437	27.7548	-0.881834	0.39604	0.999947	-4.68449	CA	no_hit
PTGES3	Q15185|Q15185-4|Q15185-3	Prostaglandin E synthase 3 OS=Homo sapiens OX=9606 GN=PTGES3 PE=1 SV=1|Isoform 4 of Prostaglandin E synthase 3 OS=Homo sapiens OX=9606 GN=PTGES3|Prostaglandin E synthase 3 OS=Homo sapiens OX=9606 GN=PTGES3 PE=1 SV=1|Isoform 3 of Prostaglandin E synthase 3 OS=Homo sapiens OX=9606 GN=PTGES3|Isoform 4 of Prostaglandin E synthase 3 OS=Homo sapiens OX=9606 GN=PTGES3	22621.0|20401.2|18580.3	8	8.84343	-0.120304	30.3684	-0.881806	0.396054	0.999947	-4.6845	CA	no_hit
LMBRD2	Q68DH5	G-protein coupled receptor-associated protein LMBRD2 OS=Homo sapiens OX=9606 GN=LMBRD2 PE=1 SV=1	91900.1	2	6.4615	-0.0971923	24.5273	-0.881635	0.396143	0.999947	-4.68456	CA	no_hit
TRAPPC1	Q9Y5R8	Trafficking protein particle complex subunit 1 OS=Homo sapiens OX=9606 GN=TRAPPC1 PE=1 SV=1	19672.5	4	7.23503	-0.0838925	26.6472	-0.8816	0.396161	0.999947	-4.68457	CA	no_hit
LAMB1	G3XAI2|P07942	Laminin subunit beta-1 OS=Homo sapiens OX=9606 GN=LAMB1 PE=1 SV=1|Laminin subunit beta-1 OS=Homo sapiens OX=9606 GN=LAMB1 PE=1 SV=2	233560.0|231008.0	24	7.59984	0.10452	29.9106	0.881519	0.396203	0.999947	-4.6846	CA	no_hit
SLC46A1	Q96NT5|Q96NT5-2	Proton-coupled folate transporter OS=Homo sapiens OX=9606 GN=SLC46A1 PE=1 SV=1|Isoform 2 of Proton-coupled folate transporter OS=Homo sapiens OX=9606 GN=SLC46A1	53483.9|49750.6	3	6.38853	-0.112442	23.8021	-0.88124	0.396348	0.999947	-4.68469	CA	no_hit
ZFAND1	E5RIS3|Q8TCF1|Q8TCF1-3|Q8TCF1-4	AN1-type zinc finger protein 1 OS=Homo sapiens OX=9606 GN=ZFAND1 PE=1 SV=1|AN1-type zinc finger protein 1 OS=Homo sapiens OX=9606 GN=ZFAND1 PE=1 SV=1|Isoform 3 of AN1-type zinc finger protein 1 OS=Homo sapiens OX=9606 GN=ZFAND1|Isoform 4 of AN1-type zinc finger protein 1 OS=Homo sapiens OX=9606 GN=ZFAND1	24082.5|39588.9|38651.4|34043.3	3	6.73465	-0.115762	25.7798	-0.881217	0.39636	0.999947	-4.6847	CA	no_hit
ACACA	A0A087X126|Q13085|Q13085-2|Q13085-3|Q13085-4	Acetyl-CoA carboxylase 1 OS=Homo sapiens OX=9606 GN=ACACA PE=1 SV=1|Acetyl-CoA carboxylase 1 OS=Homo sapiens OX=9606 GN=ACACA PE=1 SV=2|Acetyl-CoA carboxylase 1 OS=Homo sapiens OX=9606 GN=ACACA PE=1 SV=2|Isoform 2 of Acetyl-CoA carboxylase 1 OS=Homo sapiens OX=9606 GN=ACACA|Isoform 3 of Acetyl-CoA carboxylase 1 OS=Homo sapiens OX=9606 GN=ACACA|Isoform 4 of Acetyl-CoA carboxylase 1 OS=Homo sapiens…	13318.9|299950.0|293782.0|291031.0|304696.0	65	7.90879	-0.0985379	31.3901	-0.881004	0.39647	0.999947	-4.68477	CA	no_hit
RUFY1	Q96T51	RUN and FYVE domain-containing protein 1 OS=Homo sapiens OX=9606 GN=RUFY1 PE=1 SV=2	97886.3	16	7.56947	-0.0971886	29.5106	-0.880967	0.396489	0.999947	-4.68478	CA	no_hit
NUP88	Q99567	Nuclear pore complex protein Nup88 OS=Homo sapiens OX=9606 GN=NUP88 PE=1 SV=2	98622.7	18	7.70705	0.0873552	29.9071	0.880293	0.396839	0.999947	-4.685	CA	no_hit
CGGBP1	Q9UFW8	CGG triplet repeat-binding protein 1 OS=Homo sapiens OX=9606 GN=CGGBP1 PE=1 SV=2	23352.6	3	6.72383	0.13311	26.4683	0.879165	0.397425	0.999947	-4.68538	CA	no_hit
MAP4	E7EVA0|F8W9U4|P27816-5	Microtubule-associated protein OS=Homo sapiens OX=9606 GN=MAP4 PE=1 SV=1|Microtubule-associated protein OS=Homo sapiens OX=9606 GN=MAP4 PE=1 SV=1|Isoform 5 of Microtubule-associated protein 4 OS=Homo sapiens OX=9606 GN=MAP4|Microtubule-associated protein OS=Homo sapiens OX=9606 GN=MAP4 PE=1 SV=1|Microtubule-associated protein OS=Homo sapiens OX=9606 GN=MAP4 PE=1 SV=1	317427.0|112996.0|110734.0	58	8.28574	0.0823919	31.7619	0.879089	0.397465	0.999947	-4.6854	CA	no_hit
MAD2L1	Q13257	Mitotic spindle assembly checkpoint protein MAD2A OS=Homo sapiens OX=9606 GN=MAD2L1 PE=1 SV=1	27621	8	7.72657	-0.0824191	28.3313	-0.878944	0.39754	0.999947	-4.68545	CA	no_hit
UFD1	Q92890|Q92890-1	Ubiquitin recognition factor in ER-associated degradation protein 1 OS=Homo sapiens OX=9606 GN=UFD1 PE=1 SV=3|Isoform Long of Ubiquitin recognition factor in ER-associated degradation protein 1 OS=Homo sapiens OX=9606 GN=UFD1	41456.0|46343.5	9	8.05358	-0.10924	28.661	-0.878839	0.397595	0.999947	-4.68549	CA	no_hit
GSK3A	A8MT37|P49840	Glycogen synthase kinase-3 alpha OS=Homo sapiens OX=9606 GN=GSK3A PE=1 SV=2|Glycogen synthase kinase-3 alpha OS=Homo sapiens OX=9606 GN=GSK3A PE=1 SV=2	51488.6|58097.7	5	7.45488	-0.0960676	28.3611	-0.878821	0.397604	0.999947	-4.68549	CA	no_hit
AVL9	B8ZZW5|Q8NBF6|Q8NBF6-2	Late secretory pathway protein AVL9 homolog OS=Homo sapiens OX=9606 GN=AVL9 PE=1 SV=1|Late secretory pathway protein AVL9 homolog OS=Homo sapiens OX=9606 GN=AVL9 PE=1 SV=1|Isoform 2 of Late secretory pathway protein AVL9 homolog OS=Homo sapiens OX=9606 GN=AVL9|Late secretory pathway protein AVL9 homolog OS=Homo sapiens OX=9606 GN=AVL9 PE=1 SV=1|Late secretory pathway protein AVL9 homolog OS=Homo …	80442.6|82891.8|75044.9	7	7.15468	-0.0980251	27.0586	-0.878668	0.397684	0.999947	-4.68554	CA	no_hit
MRI1	Q9BV20	Methylthioribose-1-phosphate isomerase OS=Homo sapiens OX=9606 GN=MRI1 PE=1 SV=1	41901.1	8	7.32836	-0.0890935	28.1104	-0.878442	0.397802	0.999947	-4.68562	CA	no_hit
CKAP2	Q8WWK9|Q8WWK9-5|Q8WWK9-6	Cytoskeleton-associated protein 2 OS=Homo sapiens OX=9606 GN=CKAP2 PE=1 SV=1|Isoform 3 of Cytoskeleton-associated protein 2 OS=Homo sapiens OX=9606 GN=CKAP2|Isoform 4 of Cytoskeleton-associated protein 2 OS=Homo sapiens OX=9606 GN=CKAP2	100325.0|100238.0|93015.5	6	6.7683	0.178779	26.8594	0.877841	0.398114	0.999947	-4.68582	CA	no_hit
WASF2	Q9Y6W5	Wiskott-Aldrich syndrome protein family member 2 OS=Homo sapiens OX=9606 GN=WASF2 PE=1 SV=3	62996.3	8	7.50668	-0.0872678	28.2962	-0.87769	0.398193	0.999947	-4.68587	CA	no_hit
PRNP	A2A2V1|P04156	Major prion protein (Fragment) OS=Homo sapiens OX=9606 GN=PRNP PE=1 SV=1|Major prion protein OS=Homo sapiens OX=9606 GN=PRNP PE=1 SV=1	30531.1|30913.3	3	6.87891	0.0975236	26.2454	0.877463	0.398311	0.999947	-4.68594	CA	no_hit
VPS50	Q96JG6	Syndetin OS=Homo sapiens OX=9606 GN=VPS50 PE=1 SV=3	134166	16	7.2569	-0.100621	28.4708	-0.87707	0.398516	0.999947	-4.68607	CA	no_hit
RBBP9	O75884	Serine hydrolase RBBP9 OS=Homo sapiens OX=9606 GN=RBBP9 PE=1 SV=2	25169.3	5	7.31666	-0.114125	27.7146	-0.877027	0.398538	0.999947	-4.68609	CA	no_hit
ENY2	Q9NPA8|Q9NPA8-2	Transcription and mRNA export factor ENY2 OS=Homo sapiens OX=9606 GN=ENY2 PE=1 SV=1|Isoform 2 of Transcription and mRNA export factor ENY2 OS=Homo sapiens OX=9606 GN=ENY2	15590.0|14741.5	4	7.30485	0.155984	27.1616	0.876765	0.398674	0.999947	-4.68618	CA	no_hit
NAGA	P17050	Alpha-N-acetylgalactosaminidase OS=Homo sapiens OX=9606 GN=NAGA PE=1 SV=2	51001.8	5	6.64833	-0.264301	25.0132	-0.876576	0.398773	0.999947	-4.68624	CA	no_hit
BLVRB	P30043	Flavin reductase (NADPH) OS=Homo sapiens OX=9606 GN=BLVRB PE=1 SV=3	24957.3	10	8.78689	-0.10199	29.8479	-0.876509	0.398808	0.999947	-4.68626	CA	no_hit
PSMA2	A0A024RA52|P25787	Proteasome subunit alpha type OS=Homo sapiens OX=9606 GN=PSMA2 PE=1 SV=1|Proteasome subunit alpha type-2 OS=Homo sapiens OX=9606 GN=PSMA2 PE=1 SV=2	30255.2	10	8.6885	-0.109483	28.6485	-0.876278	0.398928	0.999947	-4.68634	CA	no_hit
ENO2	F5H0C8|P09104	Gamma-enolase OS=Homo sapiens OX=9606 GN=ENO2 PE=1 SV=1|Gamma-enolase OS=Homo sapiens OX=9606 GN=ENO2 PE=1 SV=3|Gamma-enolase OS=Homo sapiens OX=9606 GN=ENO2 PE=1 SV=3	40805.6|55490.5	8	7.37842	-0.0928441	26.9095	-0.876171	0.398984	0.999947	-4.68637	CA	no_hit
OGA	O60502|O60502-2|O60502-4	Protein O-GlcNAcase OS=Homo sapiens OX=9606 GN=OGA PE=1 SV=2|Protein O-GlcNAcase OS=Homo sapiens OX=9606 GN=OGA PE=1 SV=2|Isoform 2 of Protein O-GlcNAcase OS=Homo sapiens OX=9606 GN=OGA|Isoform 4 of Protein O-GlcNAcase OS=Homo sapiens OX=9606 GN=OGA	122185.0|113997.0|115596.0	14	7.57062	-0.0901304	29.0048	-0.876097	0.399022	0.999947	-4.6864	CA	no_hit
DCAKD	K7ESP4|Q8WVC6	Dephospho-CoA kinase domain-containing protein (Fragment) OS=Homo sapiens OX=9606 GN=DCAKD PE=1 SV=1|Dephospho-CoA kinase domain-containing protein OS=Homo sapiens OX=9606 GN=DCAKD PE=1 SV=1	27926.5|30297.8	5	7.46408	-0.0978111	26.9958	-0.875261	0.399458	0.999947	-4.68667	CA	no_hit
TNFAIP2	Q03169	Tumor necrosis factor alpha-induced protein 2 OS=Homo sapiens OX=9606 GN=TNFAIP2 PE=2 SV=2	83054.1	19	7.57484	-0.101184	29.4228	-0.874764	0.399717	0.999947	-4.68684	CA	no_hit
MRPL44	Q9H9J2	39S ribosomal protein L44, mitochondrial OS=Homo sapiens OX=9606 GN=MRPL44 PE=1 SV=1	44242.2	10	7.64801	0.0924412	28.6571	0.87448	0.399866	0.999947	-4.68693	CA	no_hit
PRPSAP2	O60256|O60256-3	Phosphoribosyl pyrophosphate synthase-associated protein 2 OS=Homo sapiens OX=9606 GN=PRPSAP2 PE=1 SV=1|Phosphoribosyl pyrophosphate synthase-associated protein 2 OS=Homo sapiens OX=9606 GN=PRPSAP2 PE=1 SV=1|Isoform 3 of Phosphoribosyl pyrophosphate synthase-associated protein 2 OS=Homo sapiens OX=9606 GN=PRPSAP2	48599.5|42616.4	10	7.76431	-0.0854532	28.7879	-0.874281	0.39997	0.999947	-4.687	CA	no_hit
ATP1B3	P54709	Sodium/potassium-transporting ATPase subunit beta-3 OS=Homo sapiens OX=9606 GN=ATP1B3 PE=1 SV=1	38831	8	7.32908	0.1383	27.2174	0.873507	0.400374	0.999947	-4.68725	CA	no_hit
ALDH9A1	P49189	4-trimethylaminobutyraldehyde dehydrogenase OS=Homo sapiens OX=9606 GN=ALDH9A1 PE=1 SV=3	62892.9	20	8.14527	-0.101476	30.1854	-0.87319	0.400539	0.999947	-4.68736	CA	no_hit
RAB8B	Q92930	Ras-related protein Rab-8B OS=Homo sapiens OX=9606 GN=RAB8B PE=1 SV=2	29824.3	5	7.74819	-0.104737	28.942	-0.87273	0.40078	0.999947	-4.68751	CA	no_hit
EXOSC5	Q9NQT4	Exosome complex component RRP46 OS=Homo sapiens OX=9606 GN=EXOSC5 PE=1 SV=1	29092.4	4	7.38673	0.141783	26.85	0.872569	0.400864	0.999947	-4.68756	CA	no_hit
TNS3	E9PCX8|Q68CZ2	Tensin-3 (Fragment) OS=Homo sapiens OX=9606 GN=TNS3 PE=1 SV=8|Tensin-3 OS=Homo sapiens OX=9606 GN=TNS3 PE=1 SV=2	153019.0|177965.0	31	7.84449	0.0956473	30.7076	0.872083	0.401118	0.999947	-4.68772	CA	no_hit
RBMX2	A0A1W2PP04|Q9Y388	RNA-binding motif protein, X-linked 2 OS=Homo sapiens OX=9606 GN=RBMX2 PE=1 SV=1|RNA-binding motif protein, X-linked 2 OS=Homo sapiens OX=9606 GN=RBMX2 PE=1 SV=2	44260.9|50926.4	4	6.49908	0.206972	26.784	0.871985	0.40117	0.999947	-4.68776	CA	no_hit
MOSPD2	Q8NHP6	Motile sperm domain-containing protein 2 OS=Homo sapiens OX=9606 GN=MOSPD2 PE=1 SV=1	74348.3	9	7.19979	0.080524	28.41	0.871411	0.40147	0.999947	-4.68795	CA	no_hit
RPS11	P62280	40S ribosomal protein S11 OS=Homo sapiens OX=9606 GN=RPS11 PE=1 SV=3	24978.4	11	8.5697	0.187755	30.9144	0.871395	0.401478	0.999947	-4.68795	CA	no_hit
C11orf98	E9PRG8	Uncharacterized protein C11orf98 OS=Homo sapiens OX=9606 GN=C11orf98 PE=4 SV=2	19700.8	4	7.12045	0.169171	28.3353	0.871369	0.401492	0.999947	-4.68796	CA	no_hit
CLEC16A	Q2KHT3-2	Isoform 2 of Protein CLEC16A OS=Homo sapiens OX=9606 GN=CLEC16A	118520	7	7.06442	-0.133798	26.8571	-0.871017	0.401676	0.999947	-4.68808	CA	no_hit
PHACTR4	Q8IZ21|Q8IZ21-2|Q8IZ21-3	Phosphatase and actin regulator 4 OS=Homo sapiens OX=9606 GN=PHACTR4 PE=1 SV=1|Isoform 2 of Phosphatase and actin regulator 4 OS=Homo sapiens OX=9606 GN=PHACTR4|Isoform 3 of Phosphatase and actin regulator 4 OS=Homo sapiens OX=9606 GN=PHACTR4	94514.2|95431.7|92740.5	4	6.44895	0.172609	24.0876	0.870656	0.401865	0.999947	-4.6882	CA	no_hit
PRTFDC1	Q9NRG1|Q9NRG1-2	Phosphoribosyltransferase domain-containing protein 1 OS=Homo sapiens OX=9606 GN=PRTFDC1 PE=1 SV=1|Isoform 2 of Phosphoribosyltransferase domain-containing protein 1 OS=Homo sapiens OX=9606 GN=PRTFDC1|Phosphoribosyltransferase domain-containing protein 1 OS=Homo sapiens OX=9606 GN=PRTFDC1 PE=1 SV=1	30391.1|25612.7	4	7.32617	-0.14257	26.8431	-0.870444	0.401976	0.999947	-4.68827	CA	no_hit
FLII	Q13045|Q13045-2	Protein flightless-1 homolog OS=Homo sapiens OX=9606 GN=FLII PE=1 SV=2|Isoform 2 of Protein flightless-1 homolog OS=Homo sapiens OX=9606 GN=FLII	172000.0|165745.0	36	7.86564	-0.0915427	30.7983	-0.870404	0.401997	0.999947	-4.68828	CA	no_hit
MTMR2	C9JEX3|Q13614|Q13614-2	Myotubularin-related protein 2 (Fragment) OS=Homo sapiens OX=9606 GN=MTMR2 PE=1 SV=8|Myotubularin-related protein 2 OS=Homo sapiens OX=9606 GN=MTMR2 PE=1 SV=4|Isoform 2 of Myotubularin-related protein 2 OS=Homo sapiens OX=9606 GN=MTMR2	74336.4|84248.3|75861.1	4	6.97886	-0.0967641	27.2317	-0.869616	0.40241	0.999947	-4.68854	CA	no_hit
GTPBP10	A4D1E9	GTP-binding protein 10 OS=Homo sapiens OX=9606 GN=GTPBP10 PE=1 SV=1	54446.4	8	7.11073	0.136605	27.1875	0.868888	0.402792	0.999947	-4.68878	CA	no_hit
SDE2	Q6IQ49|Q6IQ49-2	Replication stress response regulator SDE2 OS=Homo sapiens OX=9606 GN=SDE2 PE=1 SV=1|Isoform 2 of Replication stress response regulator SDE2 OS=Homo sapiens OX=9606 GN=SDE2	60795.0|59558.4	10	7.19875	0.119154	28.5215	0.868483	0.403005	0.999947	-4.68891	CA	no_hit
YJU2	Q9BW85	Splicing factor YJU2 OS=Homo sapiens OX=9606 GN=YJU2 PE=1 SV=1	45865.6	4	6.70397	0.175654	25.228	0.868445	0.403024	0.999947	-4.68892	CA	no_hit
ATP9A	O75110	Probable phospholipid-transporting ATPase IIA OS=Homo sapiens OX=9606 GN=ATP9A PE=1 SV=3	133982	7	6.8517	0.0824957	27.0839	0.867948	0.403285	0.999947	-4.68909	CA	no_hit
PPP4R2	Q9NY27	Serine/threonine-protein phosphatase 4 regulatory subunit 2 OS=Homo sapiens OX=9606 GN=PPP4R2 PE=1 SV=3	55177.4	10	7.52855	-0.0907124	28.9995	-0.867408	0.403569	0.999947	-4.68927	CA	no_hit
FAHD2A	Q96GK7	Fumarylacetoacetate hydrolase domain-containing protein 2A OS=Homo sapiens OX=9606 GN=FAHD2A PE=1 SV=1	40696.2	6	7.48712	-0.0926137	28.0524	-0.867253	0.40365	0.999947	-4.68932	CA	no_hit
PNKP	Q96T60	Bifunctional polynucleotide phosphatase/kinase OS=Homo sapiens OX=9606 GN=PNKP PE=1 SV=1	66071.5	11	7.08688	0.0965787	28.4917	0.867164	0.403697	0.999947	-4.68935	CA	no_hit
MRPL11	Q9Y3B7	39S ribosomal protein L11, mitochondrial OS=Homo sapiens OX=9606 GN=MRPL11 PE=1 SV=1	26203.2	9	7.76499	0.116698	28.3381	0.866599	0.403994	0.999947	-4.68953	CA	no_hit
ANXA8L1	Q5VT79	Annexin A8-like protein 1 OS=Homo sapiens OX=9606 GN=ANXA8L1 PE=2 SV=2	45297.4	5	7.00173	-0.181205	26.1304	-0.866305	0.404148	0.999947	-4.68963	CA	no_hit
ECD	O95905|O95905-3	Protein ecdysoneless homolog OS=Homo sapiens OX=9606 GN=ECD PE=1 SV=1|Isoform 3 of Protein ecdysoneless homolog OS=Homo sapiens OX=9606 GN=ECD	85203.4|89008.4	7	7.19674	-0.0842897	27.5022	-0.866175	0.404217	0.999947	-4.68967	CA	no_hit
MNAT1	P51948	CDK-activating kinase assembly factor MAT1 OS=Homo sapiens OX=9606 GN=MNAT1 PE=1 SV=1	44470.1	8	7.21071	0.114021	27.6737	0.865645	0.404496	0.999947	-4.68984	CA	no_hit
LNPK	Q9C0E8|Q9C0E8-2|Q9C0E8-4	Endoplasmic reticulum junction formation protein lunapark OS=Homo sapiens OX=9606 GN=LNPK PE=1 SV=2|Isoform 2 of Endoplasmic reticulum junction formation protein lunapark OS=Homo sapiens OX=9606 GN=LNPK|Isoform 4 of Endoplasmic reticulum junction formation protein lunapark OS=Homo sapiens OX=9606 GN=LNPK	54440.7|54099.6|57547.2	9	7.16753	-0.119852	27.9487	-0.865502	0.404571	0.999947	-4.68989	CA	no_hit
PLGRKT	Q9HBL7	Plasminogen receptor (KT) OS=Homo sapiens OX=9606 GN=PLGRKT PE=1 SV=1	21448.8	5	7.56285	-0.0907008	28.1886	-0.864512	0.405092	0.999947	-4.69022	CA	no_hit
DDAH2	O95865	N(G),N(G)-dimethylarginine dimethylaminohydrolase 2 OS=Homo sapiens OX=9606 GN=DDAH2 PE=1 SV=1	32040	8	7.5148	-0.103581	27.0577	-0.863327	0.405716	0.999947	-4.6906	CA	no_hit
RAP2B	P61225	Ras-related protein Rap-2b OS=Homo sapiens OX=9606 GN=RAP2B PE=1 SV=1	24065.6	2	7.49327	-0.162413	26.8078	-0.863288	0.405737	0.999947	-4.69062	CA	no_hit
ALKBH5	Q6P6C2|Q6P6C2-1|Q6P6C2-3	RNA demethylase ALKBH5 OS=Homo sapiens OX=9606 GN=ALKBH5 PE=1 SV=2|Isoform 1 of RNA demethylase ALKBH5 OS=Homo sapiens OX=9606 GN=ALKBH5|Isoform 3 of RNA demethylase ALKBH5 OS=Homo sapiens OX=9606 GN=ALKBH5	52175.9|60511.8|50170.7	7	7.24179	0.13312	27.6162	0.863068	0.405853	0.999947	-4.69069	CA	no_hit
ITIH3	A0A087WW43|E7ET33|Q06033|Q06033-2	Inter-alpha-trypsin inhibitor heavy chain H3 OS=Homo sapiens OX=9606 GN=ITIH3 PE=1 SV=1|Inter-alpha-trypsin inhibitor heavy chain H3 OS=Homo sapiens OX=9606 GN=ITIH3 PE=1 SV=1|Inter-alpha-trypsin inhibitor heavy chain H3 OS=Homo sapiens OX=9606 GN=ITIH3 PE=1 SV=2|Isoform 2 of Inter-alpha-trypsin inhibitor heavy chain H3 OS=Homo sapiens OX=9606 GN=ITIH3	89005.5|92302.3|118020.0|117499.0	4	7.20015	0.156934	27.7035	0.861992	0.40642	0.999947	-4.69104	CA	no_hit
PSMD12	O00232	26S proteasome non-ATPase regulatory subunit 12 OS=Homo sapiens OX=9606 GN=PSMD12 PE=1 SV=3	66350.6	26	8.555	-0.0944675	31.3506	-0.861963	0.406436	0.999947	-4.69105	CA	no_hit
XPO5	Q9HAV4	Exportin-5 OS=Homo sapiens OX=9606 GN=XPO5 PE=1 SV=1	157801	24	7.47851	-0.104818	29.8176	-0.861926	0.406455	0.999947	-4.69106	CA	no_hit
SSH3	Q8TE77|Q8TE77-3	Protein phosphatase Slingshot homolog 3 OS=Homo sapiens OX=9606 GN=SSH3 PE=1 SV=2|Isoform 3 of Protein phosphatase Slingshot homolog 3 OS=Homo sapiens OX=9606 GN=SSH3	77551.6|60939.1	5	6.62784	-0.112742	25.5435	-0.861822	0.40651	0.999947	-4.6911	CA	no_hit
RAVER1	A0A087WZ13|E9PAU2|Q8IY67-2	Ribonucleoprotein PTB-binding 1 OS=Homo sapiens OX=9606 GN=RAVER1 PE=1 SV=1|Ribonucleoprotein PTB-binding 1 OS=Homo sapiens OX=9606 GN=RAVER1 PE=1 SV=1|Ribonucleoprotein PTB-binding 1 OS=Homo sapiens OX=9606 GN=RAVER1 PE=1 SV=1|Ribonucleoprotein PTB-binding 1 OS=Homo sapiens OX=9606 GN=RAVER1 PE=1 SV=1|Isoform 2 of Ribonucleoprotein PTB-binding 1 OS=Homo sapiens OX=9606 GN=RAVER1	87130.5|89168.6|87146.5	8	7.07471	0.134124	27.3034	0.861742	0.406552	0.999947	-4.69112	CA	no_hit
S100A13	Q99584	Protein S100-A13 OS=Homo sapiens OX=9606 GN=S100A13 PE=1 SV=1	15418.8	6	8.38565	-0.119678	29.0147	-0.861558	0.406649	0.999947	-4.69118	CA	no_hit
ARHGEF11	O15085-2|O15085	Isoform 2 of Rho guanine nucleotide exchange factor 11 OS=Homo sapiens OX=9606 GN=ARHGEF11|Rho guanine nucleotide exchange factor 11 OS=Homo sapiens OX=9606 GN=ARHGEF11 PE=1 SV=1|Isoform 2 of Rho guanine nucleotide exchange factor 11 OS=Homo sapiens OX=9606 GN=ARHGEF11	196474.0|191576.0	11	6.89028	0.114952	27.6712	0.860609	0.407151	0.999947	-4.69149	CA	no_hit
DPH6	Q7L8W6	Diphthine--ammonia ligase OS=Homo sapiens OX=9606 GN=DPH6 PE=1 SV=3	35192.6	4	6.74864	-0.0887979	25.8187	-0.860421	0.40725	0.999947	-4.69156	CA	no_hit
TRIM16	O95361	Tripartite motif-containing protein 16 OS=Homo sapiens OX=9606 GN=TRIM16 PE=1 SV=3	76443.8	20	7.87716	-0.0832063	29.6061	-0.860237	0.407347	0.999947	-4.69162	CA	no_hit
ATG5	Q9H1Y0	Autophagy protein 5 OS=Homo sapiens OX=9606 GN=ATG5 PE=1 SV=2	38738.5	6	6.9018	0.144962	26.8529	0.859893	0.407529	0.999947	-4.69173	CA	no_hit
AFF4	Q9UHB7	AF4/FMR2 family member 4 OS=Homo sapiens OX=9606 GN=AFF4 PE=1 SV=1	164894	11	6.84795	0.228785	27.7642	0.859796	0.40758	0.999947	-4.69176	CA	no_hit
TAF6L	Q9Y6J9	TAF6-like RNA polymerase II p300/CBP-associated factor-associated factor 65 kDa subunit 6L OS=Homo sapiens OX=9606 GN=TAF6L PE=1 SV=1	74426.3	7	6.77041	0.10945	27.2025	0.85914	0.407927	0.999947	-4.69197	CA	no_hit
NEURL4	I3L100|I3L2W2|Q96JN8|Q96JN8-2	Neuralized-like protein 4 (Fragment) OS=Homo sapiens OX=9606 GN=NEURL4 PE=1 SV=8|Neuralized-like protein 4 OS=Homo sapiens OX=9606 GN=NEURL4 PE=1 SV=1|Neuralized-like protein 4 OS=Homo sapiens OX=9606 GN=NEURL4 PE=1 SV=2|Isoform 2 of Neuralized-like protein 4 OS=Homo sapiens OX=9606 GN=NEURL4	166294.0|178446.0|181347.0|180857.0	3	6.27003	0.161636	24.7657	0.858529	0.408251	0.999947	-4.69217	CA	no_hit
PCIF1	Q9H4Z3	mRNA (2'-O-methyladenosine-N(6)-)-methyltransferase OS=Homo sapiens OX=9606 GN=PCIF1 PE=1 SV=1	91873.8	10	6.90517	-0.0793746	26.8829	-0.85846	0.408287	0.999947	-4.6922	CA	no_hit
WDFY1	Q8IWB7	WD repeat and FYVE domain-containing protein 1 OS=Homo sapiens OX=9606 GN=WDFY1 PE=1 SV=1	53099.6	10	7.27944	-0.0933854	27.3771	-0.858365	0.408338	0.999947	-4.69223	CA	no_hit
H2AX	P16104	Histone H2AX OS=Homo sapiens OX=9606 GN=H2AX PE=1 SV=2	19090.1	4	7.83573	0.300417	28.965	0.858128	0.408463	0.999947	-4.6923	CA	no_hit
FPGT	O14772|O14772-2	Fucose-1-phosphate guanylyltransferase OS=Homo sapiens OX=9606 GN=FPGT PE=1 SV=3|Fucose-1-phosphate guanylyltransferase OS=Homo sapiens OX=9606 GN=FPGT PE=1 SV=3|Isoform 5 of Fucose-1-phosphate guanylyltransferase OS=Homo sapiens OX=9606 GN=FPGT	80799.1|46200.2	4	7.40508	-0.0938641	27.7028	-0.857501	0.408795	0.999947	-4.69251	CA	no_hit
MCM3	P25205|P25205-2	DNA replication licensing factor MCM3 OS=Homo sapiens OX=9606 GN=MCM3 PE=1 SV=3|Isoform 2 of DNA replication licensing factor MCM3 OS=Homo sapiens OX=9606 GN=MCM3	110108.0|115032.0	37	8.23112	0.0919783	31.0861	0.857308	0.408898	0.999947	-4.69257	CA	no_hit
ECE1	A0A3B3ISF9|B4DKB2|P42892|P42892-2|P42892-3|P42892-4	Endothelin-converting enzyme 1 OS=Homo sapiens OX=9606 GN=ECE1 PE=1 SV=1|Endothelin-converting enzyme 1 OS=Homo sapiens OX=9606 GN=ECE1 PE=1 SV=1|Endothelin-converting enzyme 1 OS=Homo sapiens OX=9606 GN=ECE1 PE=1 SV=2|Isoform A of Endothelin-converting enzyme 1 OS=Homo sapiens OX=9606 GN=ECE1|Isoform C of Endothelin-converting enzyme 1 OS=Homo sapiens OX=9606 GN=ECE1|Isoform D of Endothelin-conv…	108165.0|95878.5|100075.0|98720.3|98473.9|99933.7	12	7.53702	0.109694	28.3948	0.857187	0.408962	0.999947	-4.69261	CA	no_hit
RNASEL	Q05823|Q05823-2	2-5A-dependent ribonuclease OS=Homo sapiens OX=9606 GN=RNASEL PE=1 SV=2|Isoform 2 of 2-5A-dependent ribonuclease OS=Homo sapiens OX=9606 GN=RNASEL|2-5A-dependent ribonuclease OS=Homo sapiens OX=9606 GN=RNASEL PE=1 SV=2	103140.0|88903.9	7	6.88877	-0.0969393	26.8814	-0.85669	0.409225	0.999947	-4.69277	CA	no_hit
MSH6	P52701	DNA mismatch repair protein Msh6 OS=Homo sapiens OX=9606 GN=MSH6 PE=1 SV=2	185238	43	7.8673	-0.0897567	31.2562	-0.856436	0.40936	0.999947	-4.69285	CA	no_hit
USP40	Q9NVE5|Q9NVE5-3	Ubiquitin carboxyl-terminal hydrolase 40 OS=Homo sapiens OX=9606 GN=USP40 PE=1 SV=3|Isoform 3 of Ubiquitin carboxyl-terminal hydrolase 40 OS=Homo sapiens OX=9606 GN=USP40	166583.0|168011.0	3	6.47764	-0.105617	24.8918	-0.856084	0.409546	0.999947	-4.69297	CA	no_hit
VARS1	P26640	Valine--tRNA ligase OS=Homo sapiens OX=9606 GN=VARS1 PE=1 SV=4	158982	44	8.15559	-0.0913826	31.2563	-0.855912	0.409638	0.999947	-4.69303	CA	no_hit
PIGB	F5H1S1|Q92521	Mannosyltransferase OS=Homo sapiens OX=9606 GN=PIGB PE=1 SV=2|GPI mannosyltransferase 3 OS=Homo sapiens OX=9606 GN=PIGB PE=1 SV=1	74139.6|74025.6	4	6.60832	0.104507	25.1778	0.855599	0.409804	0.999947	-4.69313	CA	no_hit
NDUFA3	O95167|Q6FGG4	NADH dehydrogenase [ubiquinone] 1 alpha subcomplex subunit 3 OS=Homo sapiens OX=9606 GN=NDUFA3 PE=1 SV=1|NADH dehydrogenase (Ubiquinone) 1 alpha subcomplex, 3, 9kDa, isoform CRA_e OS=Homo sapiens OX=9606 GN=NDUFA3 PE=1 SV=1	11098.1	3	7.11672	0.175421	26.2596	0.855534	0.409839	0.999947	-4.69315	CA	no_hit
LPCAT1	Q8NF37	Lysophosphatidylcholine acyltransferase 1 OS=Homo sapiens OX=9606 GN=LPCAT1 PE=1 SV=2	67041.6	10	7.78189	-0.114908	28.3182	-0.85537	0.409926	0.999947	-4.6932	CA	no_hit
WASHC4	A0A087X256|Q2M389	WASH complex subunit 4 OS=Homo sapiens OX=9606 GN=WASHC4 PE=1 SV=1|WASH complex subunit 4 OS=Homo sapiens OX=9606 GN=WASHC4 PE=1 SV=2	165125.0|165025.0	20	7.727	-0.0884318	29.6029	-0.85521	0.41001	0.999947	-4.69325	CA	no_hit
CETN2	P41208	Centrin-2 OS=Homo sapiens OX=9606 GN=CETN2 PE=1 SV=1	27026.8	5	7.3918	0.147466	27.9306	0.854655	0.410305	0.999947	-4.69343	CA	no_hit
ANXA4	P09525|P09525-2	Annexin A4 OS=Homo sapiens OX=9606 GN=ANXA4 PE=1 SV=4|Isoform 2 of Annexin A4 OS=Homo sapiens OX=9606 GN=ANXA4	42780.8|32141.0	25	8.86909	-0.100707	32.1432	-0.854435	0.410422	0.999947	-4.69351	CA	no_hit
LRPAP1	D6REW6|P30533	Alpha-2-macroglobulin receptor-associated protein OS=Homo sapiens OX=9606 GN=LRPAP1 PE=1 SV=1|Alpha-2-macroglobulin receptor-associated protein OS=Homo sapiens OX=9606 GN=LRPAP1 PE=1 SV=1|Alpha-2-macroglobulin receptor-associated protein OS=Homo sapiens OX=9606 GN=LRPAP1 PE=1 SV=1	13890.9|51783.9	13	7.65823	0.1716	28.996	0.85431	0.410489	0.999947	-4.69355	CA	no_hit
TEX264	Q9Y6I9	Testis-expressed protein 264 OS=Homo sapiens OX=9606 GN=TEX264 PE=1 SV=1	38102.6	9	7.81001	-0.112363	29.0947	-0.854195	0.41055	0.999947	-4.69358	CA	no_hit
SACM1L	A0A5F9ZHN7|Q9NTJ5	Phosphatidylinositide phosphatase SAC1 OS=Homo sapiens OX=9606 GN=SACM1L PE=1 SV=1|Phosphatidylinositide phosphatase SAC1 OS=Homo sapiens OX=9606 GN=SACM1L PE=1 SV=2	80092.3|77171.8	18	7.82651	-0.0793418	29.4968	-0.854112	0.410593	0.999947	-4.69361	CA	no_hit
XPO7	Q9UIA9	Exportin-7 OS=Homo sapiens OX=9606 GN=XPO7 PE=1 SV=3	138886	32	7.90737	-0.0997495	30.2996	-0.853952	0.410679	0.999947	-4.69366	CA	no_hit
RAB4B	P61018	Ras-related protein Rab-4B OS=Homo sapiens OX=9606 GN=RAB4B PE=1 SV=1	26899.1	3	6.71633	-0.10469	25.5643	-0.853569	0.410882	0.999947	-4.69379	CA	no_hit
EIF3K	K7ERF1|Q9UBQ5	Eukaryotic translation initiation factor 3 subunit K OS=Homo sapiens OX=9606 GN=EIF3K PE=1 SV=1|Eukaryotic translation initiation factor 3 subunit K OS=Homo sapiens OX=9606 GN=EIF3K PE=1 SV=1|Eukaryotic translation initiation factor 3 subunit K OS=Homo sapiens OX=9606 GN=EIF3K PE=1 SV=1	25959.5|28979.0	6	8.35037	-0.0914174	28.7818	-0.852937	0.411218	0.999947	-4.69399	CA	no_hit
TMCO1	Q9UM00|Q9UM00-1	Calcium load-activated calcium channel OS=Homo sapiens OX=9606 GN=TMCO1 PE=1 SV=2|Isoform 3 of Calcium load-activated calcium channel OS=Homo sapiens OX=9606 GN=TMCO1	33848.9|27169.2	4	7.98177	-0.131319	28.0842	-0.852928	0.411223	0.999947	-4.69399	CA	no_hit
PSIP1	O75475	PC4 and SFRS1-interacting protein OS=Homo sapiens OX=9606 GN=PSIP1 PE=1 SV=1	85734.1	16	8.11455	0.138127	30.7235	0.852665	0.411363	0.999947	-4.69408	CA	no_hit
RAC1	P63000|P63000-2	Ras-related C3 botulinum toxin substrate 1 OS=Homo sapiens OX=9606 GN=RAC1 PE=1 SV=1|Isoform B of Ras-related C3 botulinum toxin substrate 1 OS=Homo sapiens OX=9606 GN=RAC1	27006.9|29935.6	7	8.34168	-0.10418	29.593	-0.852109	0.411659	0.999947	-4.69426	CA	no_hit
HADHB	P55084	Trifunctional enzyme subunit beta, mitochondrial OS=Homo sapiens OX=9606 GN=HADHB PE=1 SV=3	62193.9	21	8.45806	0.0737814	30.9305	0.852079	0.411675	0.999947	-4.69427	CA	no_hit
KMT2B	Q9UMN6	Histone-lysine N-methyltransferase 2B OS=Homo sapiens OX=9606 GN=KMT2B PE=1 SV=1	332952	7	6.51213	0.127667	25.9663	0.851918	0.411761	0.999947	-4.69432	CA	no_hit
CYBC1	J3KSJ5|J3QRG5|Q9BQA9|Q9BQA9-2|J3KTF4	Cytochrome b-245 chaperone 1 OS=Homo sapiens OX=9606 GN=CYBC1 PE=1 SV=1|Cytochrome b-245 chaperone 1 OS=Homo sapiens OX=9606 GN=CYBC1 PE=1 SV=1|Cytochrome b-245 chaperone 1 OS=Homo sapiens OX=9606 GN=CYBC1 PE=1 SV=1|Isoform 2 of Cytochrome b-245 chaperone 1 OS=Homo sapiens OX=9606 GN=CYBC1|Cytochrome b-245 chaperone 1 OS=Homo sapiens OX=9606 GN=CYBC1 PE=1 SV=1|Cytochrome b-245 chaperone 1 (Fragme…	24486.0|19538.8|23916.9|22580.2|11321.4	4	7.37128	-0.128994	26.8716	-0.851879	0.411782	0.999947	-4.69433	CA	no_hit
RABGGTA	Q92696	Geranylgeranyl transferase type-2 subunit alpha OS=Homo sapiens OX=9606 GN=RABGGTA PE=1 SV=2	72198	17	7.24598	-0.0845833	29.0663	-0.850489	0.412522	0.999947	-4.69478	CA	no_hit
TTPAL	Q5QPC2|Q9BTX7	Alpha-tocopherol transfer protein-like (Fragment) OS=Homo sapiens OX=9606 GN=TTPAL PE=1 SV=1|Alpha-tocopherol transfer protein-like OS=Homo sapiens OX=9606 GN=TTPAL PE=1 SV=2|Alpha-tocopherol transfer protein-like OS=Homo sapiens OX=9606 GN=TTPAL PE=1 SV=2	36342.4|44727.1	2	6.3283	-0.110071	23.876	-0.850389	0.412576	0.999947	-4.69482	CA	no_hit
ARMC10	Q8N2F6|Q8N2F6-3	Armadillo repeat-containing protein 10 OS=Homo sapiens OX=9606 GN=ARMC10 PE=1 SV=1|Isoform 3 of Armadillo repeat-containing protein 10 OS=Homo sapiens OX=9606 GN=ARMC10	43030.3|36212.8	7	7.08872	-0.11385	25.8417	-0.849483	0.413059	0.999947	-4.69511	CA	no_hit
TMEM87B	A0A494BZZ8|Q96K49|Q96K49-2	Transmembrane protein 87B (Fragment) OS=Homo sapiens OX=9606 GN=TMEM87B PE=1 SV=1|Transmembrane protein 87B OS=Homo sapiens OX=9606 GN=TMEM87B PE=1 SV=1|Isoform 2 of Transmembrane protein 87B OS=Homo sapiens OX=9606 GN=TMEM87B	72169.5|73001.0|72869.9	4	7.00892	-0.132251	27.1233	-0.849305	0.413153	0.999947	-4.69517	CA	no_hit
COX6B1	P14854	Cytochrome c oxidase subunit 6B1 OS=Homo sapiens OX=9606 GN=COX6B1 PE=1 SV=2	12239	6	8.09952	0.197132	28.4966	0.849034	0.413298	0.999947	-4.69526	CA	no_hit
CALD1	Q05682-5	Isoform 5 of Caldesmon OS=Homo sapiens OX=9606 GN=CALD1	80702.4	29	8.06385	0.0949301	31.0639	0.848978	0.413328	0.999947	-4.69527	CA	no_hit
CBX1	J3KS05|P83916|B5MD17	Chromobox protein homolog 1 (Fragment) OS=Homo sapiens OX=9606 GN=CBX1 PE=1 SV=8|Chromobox protein homolog 1 OS=Homo sapiens OX=9606 GN=CBX1 PE=1 SV=1|Chromobox protein homolog 1 (Fragment) OS=Homo sapiens OX=9606 GN=CBX1 PE=1 SV=1|Chromobox protein homolog 1 (Fragment) OS=Homo sapiens OX=9606 GN=CBX1 PE=1 SV=8|Chromobox protein homolog 1 OS=Homo sapiens OX=9606 GN=CBX1 PE=1 SV=1	27737.2|30036.4|27032.9	4	7.20224	0.145953	28.2188	0.848897	0.413371	0.999947	-4.6953	CA	no_hit
BAG5	Q9UL15|Q9UL15-2	BAG family molecular chaperone regulator 5 OS=Homo sapiens OX=9606 GN=BAG5 PE=1 SV=1|Isoform 2 of BAG family molecular chaperone regulator 5 OS=Homo sapiens OX=9606 GN=BAG5	62993.6|68236.1	11	7.21812	0.0857467	27.8898	0.84878	0.413434	0.999947	-4.69534	CA	no_hit
NUP98	P52948|P52948-5	Nuclear pore complex protein Nup98-Nup96 OS=Homo sapiens OX=9606 GN=NUP98 PE=1 SV=4|Isoform 5 of Nuclear pore complex protein Nup98-Nup96 OS=Homo sapiens OX=9606 GN=NUP98	224759.0|222694.0	44	7.85431	0.0987532	31.0161	0.848507	0.41358	0.999947	-4.69543	CA	no_hit
DOCK5	Q9H7D0	Dedicator of cytokinesis protein 5 OS=Homo sapiens OX=9606 GN=DOCK5 PE=1 SV=3	260004	37	7.59322	-0.0972582	30.5157	-0.848464	0.413602	0.999947	-4.69544	CA	no_hit
PDAP1	Q13442	28 kDa heat- and acid-stable phosphoprotein OS=Homo sapiens OX=9606 GN=PDAP1 PE=1 SV=1	29135.4	11	7.94372	0.143486	29.1118	0.848321	0.413679	0.999947	-4.69549	CA	no_hit
ECSIT	Q9BQ95|Q9BQ95-2|Q9BQ95-4|K7EPL5	Evolutionarily conserved signaling intermediate in Toll pathway, mitochondrial OS=Homo sapiens OX=9606 GN=ECSIT PE=1 SV=1|Isoform 2 of Evolutionarily conserved signaling intermediate in Toll pathway, mitochondrial OS=Homo sapiens OX=9606 GN=ECSIT|Isoform 4 of Evolutionarily conserved signaling intermediate in Toll pathway, mitochondrial OS=Homo sapiens OX=9606 GN=ECSIT|Evolutionarily conserved-si…	53413.7|36824.7|38270.5|29211.8	4	6.63323	-0.101938	25.7381	-0.84827	0.413706	0.999947	-4.6955	CA	no_hit
DYNC1H1	Q14204	Cytoplasmic dynein 1 heavy chain 1 OS=Homo sapiens OX=9606 GN=DYNC1H1 PE=1 SV=5	623942	192	8.50994	-0.103382	33.8638	-0.848185	0.413752	0.999947	-4.69553	CA	no_hit
TIMM8A	O60220	Mitochondrial import inner membrane translocase subunit Tim8 A OS=Homo sapiens OX=9606 GN=TIMM8A PE=1 SV=1	13044.6	3	7.10624	0.226461	26.0482	0.847721	0.414	0.999947	-4.69568	CA	no_hit
TXNL1	O43396	Thioredoxin-like protein 1 OS=Homo sapiens OX=9606 GN=TXNL1 PE=1 SV=3	38105.6	10	7.69945	-0.120617	28.6559	-0.847526	0.414104	0.999947	-4.69574	CA	no_hit
ETF1	P62495|P62495-2	Eukaryotic peptide chain release factor subunit 1 OS=Homo sapiens OX=9606 GN=ETF1 PE=1 SV=3|Eukaryotic peptide chain release factor subunit 1 OS=Homo sapiens OX=9606 GN=ETF1 PE=1 SV=3|Isoform 2 of Eukaryotic peptide chain release factor subunit 1 OS=Homo sapiens OX=9606 GN=ETF1	60483.9|55701.2	19	8.43237	-0.0864184	30.6333	-0.847202	0.414277	0.999947	-4.69585	CA	no_hit
ABRAXAS2	Q15018	BRISC complex subunit Abraxas 2 OS=Homo sapiens OX=9606 GN=ABRAXAS2 PE=1 SV=2	52575.7	7	7.24607	-0.0945693	26.5795	-0.847114	0.414324	0.999947	-4.69588	CA	no_hit
RBMX	P38159|P38159-2	RNA-binding motif protein, X chromosome OS=Homo sapiens OX=9606 GN=RBMX PE=1 SV=3|Isoform 2 of RNA-binding motif protein, X chromosome OS=Homo sapiens OX=9606 GN=RBMX	46261.0|44472.1	9	8.43879	0.209912	30.8005	0.846686	0.414553	0.999947	-4.69601	CA	no_hit
SERPINB5	P36952	Serpin B5 OS=Homo sapiens OX=9606 GN=SERPINB5 PE=1 SV=2	54089.4	8	7.10009	0.184669	26.3263	0.84667	0.414561	0.999947	-4.69602	CA	no_hit
WDR54	Q9H977|Q9H977-4	WD repeat-containing protein 54 OS=Homo sapiens OX=9606 GN=WDR54 PE=1 SV=1|Isoform 2 of WD repeat-containing protein 54 OS=Homo sapiens OX=9606 GN=WDR54	37712.0|39296.8	3	6.42359	-0.121242	24.4818	-0.84664	0.414578	0.999947	-4.69603	CA	no_hit
EXOC1	Q9NV70|Q9NV70-2	Exocyst complex component 1 OS=Homo sapiens OX=9606 GN=EXOC1 PE=1 SV=4|Isoform 2 of Exocyst complex component 1 OS=Homo sapiens OX=9606 GN=EXOC1|Isoform 2 of Exocyst complex component 1 OS=Homo sapiens OX=9606 GN=EXOC1	126805.0|124498.0	15	7.31626	-0.0996832	29.1983	-0.845681	0.415091	0.999947	-4.69634	CA	no_hit
HDAC1	Q13547	Histone deacetylase 1 OS=Homo sapiens OX=9606 GN=HDAC1 PE=1 SV=1	67806.2	12	7.83767	0.104214	29.6606	0.845263	0.415315	0.999947	-4.69647	CA	no_hit
AKT1S1	Q96B36|Q96B36-3	Proline-rich AKT1 substrate 1 OS=Homo sapiens OX=9606 GN=AKT1S1 PE=1 SV=1|Isoform 3 of Proline-rich AKT1 substrate 1 OS=Homo sapiens OX=9606 GN=AKT1S1|Proline-rich AKT1 substrate 1 OS=Homo sapiens OX=9606 GN=AKT1S1 PE=1 SV=1	29419.8|31297.6	5	7.52341	-0.120533	26.6377	-0.844587	0.415677	0.999947	-4.69669	CA	no_hit
EMC2	Q15006	ER membrane protein complex subunit 2 OS=Homo sapiens OX=9606 GN=EMC2 PE=1 SV=1	41675	9	7.88591	0.124199	28.4467	0.844571	0.415685	0.999947	-4.69669	CA	no_hit
PPAT	Q06203	Amidophosphoribosyltransferase OS=Homo sapiens OX=9606 GN=PPAT PE=1 SV=1	68199.5	12	7.66199	-0.083269	28.7235	-0.844183	0.415893	0.999947	-4.69682	CA	no_hit
CORO1B	Q9BR76	Coronin-1B OS=Homo sapiens OX=9606 GN=CORO1B PE=1 SV=1	61577.1	14	8.14138	-0.0904296	29.4854	-0.843431	0.416296	0.999947	-4.69706	CA	no_hit
MIB1	Q86YT6	E3 ubiquitin-protein ligase MIB1 OS=Homo sapiens OX=9606 GN=MIB1 PE=1 SV=1	131017	5	6.57993	0.141949	26.3418	0.843419	0.416303	0.999947	-4.69707	CA	no_hit
CKAP4	Q07065	Cytoskeleton-associated protein 4 OS=Homo sapiens OX=9606 GN=CKAP4 PE=1 SV=2	78265.1	36	8.28771	0.194854	31.6768	0.843187	0.416427	0.999947	-4.69714	CA	no_hit
MAP7	A0A087WZ40|Q14244|Q14244-6|Q14244-7	Ensconsin OS=Homo sapiens OX=9606 GN=MAP7 PE=1 SV=1|Ensconsin OS=Homo sapiens OX=9606 GN=MAP7 PE=1 SV=1|Isoform 6 of Ensconsin OS=Homo sapiens OX=9606 GN=MAP7|Isoform 7 of Ensconsin OS=Homo sapiens OX=9606 GN=MAP7|Ensconsin OS=Homo sapiens OX=9606 GN=MAP7 PE=1 SV=1	104060.0|99021.7|98141.4|103137.0	17	7.97801	0.185535	30.5104	0.84298	0.416538	0.999947	-4.69721	CA	no_hit
LMTK2	Q8IWU2	Serine/threonine-protein kinase LMTK2 OS=Homo sapiens OX=9606 GN=LMTK2 PE=1 SV=2	183945	3	6.23734	0.100365	25.0982	0.842958	0.41655	0.999947	-4.69721	CA	no_hit
NADSYN1	Q6IA69	Glutamine-dependent NAD(+) synthetase OS=Homo sapiens OX=9606 GN=NADSYN1 PE=1 SV=3	87846	11	7.38663	-0.105111	28.2097	-0.842495	0.416799	0.999947	-4.69736	CA	no_hit
KIF1C	O43896	Kinesin-like protein KIF1C OS=Homo sapiens OX=9606 GN=KIF1C PE=1 SV=3	139544	12	6.76502	0.110873	27.2903	0.841226	0.41748	0.999947	-4.69777	CA	no_hit
ITGA6	P23229|P23229-3|P23229-5	Integrin alpha-6 OS=Homo sapiens OX=9606 GN=ITGA6 PE=1 SV=5|Isoform Alpha-6X1B of Integrin alpha-6 OS=Homo sapiens OX=9606 GN=ITGA6|Isoform Alpha-6X2B of Integrin alpha-6 OS=Homo sapiens OX=9606 GN=ITGA6	149627.0|144773.0|144385.0	26	7.50338	0.0793084	29.4175	0.841187	0.417501	0.999947	-4.69778	CA	no_hit
GARS1	P41250	Glycine--tRNA ligase OS=Homo sapiens OX=9606 GN=GARS1 PE=1 SV=3	99672.7	27	8.54635	-0.0920087	31.2488	-0.841151	0.417521	0.999947	-4.69779	CA	no_hit
TIMM44	O43615	Mitochondrial import inner membrane translocase subunit TIM44 OS=Homo sapiens OX=9606 GN=TIMM44 PE=1 SV=2	64138.1	18	7.85673	-0.102232	30.0045	-0.840231	0.418015	0.999947	-4.69809	CA	no_hit
ROBO1	A0A087WTM1|A0A087WZ85|A0A0A0MSX4|Q9Y6N7|Q9Y6N7-2|Q9Y6N7-3|Q9Y6N7-4|Q9Y6N7-5|Q9Y6N7-6	Roundabout homolog 1 OS=Homo sapiens OX=9606 GN=ROBO1 PE=1 SV=1|Roundabout homolog 1 OS=Homo sapiens OX=9606 GN=ROBO1 PE=1 SV=1|Roundabout homolog 1 OS=Homo sapiens OX=9606 GN=ROBO1 PE=1 SV=1|Roundabout homolog 1 OS=Homo sapiens OX=9606 GN=ROBO1 PE=1 SV=1|Isoform 2 of Roundabout homolog 1 OS=Homo sapiens OX=9606 GN=ROBO1|Isoform 3 of Roundabout homolog 1 OS=Homo sapiens OX=9606 GN=ROBO1|Isoform 4…	198592.0|188093.0|188827.0|204165.0|204868.0|199558.0|199315.0|198580.0|191135.0	4	6.5789	0.101363	26.1778	0.839694	0.418304	0.999947	-4.69826	CA	no_hit
LPIN3	Q9BQK8|Q9BQK8-2	Phosphatidate phosphatase LPIN3 OS=Homo sapiens OX=9606 GN=LPIN3 PE=1 SV=3|Isoform 2 of Phosphatidate phosphatase LPIN3 OS=Homo sapiens OX=9606 GN=LPIN3	108672.0|108759.0	3	6.19304	0.124179	24.7327	0.839034	0.418659	0.999947	-4.69847	CA	no_hit
DCBLD2	Q96PD2|Q96PD2-2	Discoidin, CUB and LCCL domain-containing protein 2 OS=Homo sapiens OX=9606 GN=DCBLD2 PE=1 SV=1|Isoform 2 of Discoidin, CUB and LCCL domain-containing protein 2 OS=Homo sapiens OX=9606 GN=DCBLD2	98061.4|99739.2	14	7.65369	-0.119466	28.9842	-0.838439	0.41898	0.999947	-4.69866	CA	no_hit
TP53I3	Q53FA7	Quinone oxidoreductase PIG3 OS=Homo sapiens OX=9606 GN=TP53I3 PE=1 SV=2	41768.8	15	8.1112	-0.104332	29.3824	-0.838055	0.419187	0.999947	-4.69879	CA	no_hit
RND1	Q92730	Rho-related GTP-binding protein Rho6 OS=Homo sapiens OX=9606 GN=RND1 PE=1 SV=1	31838	3	6.51584	0.105156	24.521	0.838035	0.419197	0.999947	-4.69879	CA	no_hit
PGM1	P36871|A0A3B3ITK7	Phosphoglucomutase-1 OS=Homo sapiens OX=9606 GN=PGM1 PE=1 SV=3|Phosphoglucomutase-1 OS=Homo sapiens OX=9606 GN=PGM1 PE=1 SV=1|Phosphoglucomutase-1 OS=Homo sapiens OX=9606 GN=PGM1 PE=1 SV=3	72647.1|75211.1	27	8.03852	-0.0884218	30.9702	-0.837599	0.419432	0.999947	-4.69893	CA	no_hit
MDN1	Q9NU22	Midasin OS=Homo sapiens OX=9606 GN=MDN1 PE=1 SV=2	734746	51	7.21006	0.165764	30.421	0.837393	0.419544	0.999947	-4.699	CA	no_hit
ACLY	P53396|P53396-2	ATP-citrate synthase OS=Homo sapiens OX=9606 GN=ACLY PE=1 SV=3|Isoform 2 of ATP-citrate synthase OS=Homo sapiens OX=9606 GN=ACLY	143577.0|142511.0	60	9.14673	-0.092988	33.097	-0.837119	0.419691	0.999947	-4.69908	CA	no_hit
HPS6	Q86YV9	Hermansky-Pudlak syndrome 6 protein OS=Homo sapiens OX=9606 GN=HPS6 PE=1 SV=1	88284.2	8	6.81696	-0.0934253	26.2132	-0.836931	0.419793	0.999947	-4.69914	CA	no_hit
TRMT61B	Q9BVS5	tRNA (adenine(58)-N(1))-methyltransferase, mitochondrial OS=Homo sapiens OX=9606 GN=TRMT61B PE=1 SV=2	62133.8	7	6.76987	0.101265	26.4849	0.836724	0.419904	0.999947	-4.69921	CA	no_hit
SART1	O43290	U4/U6.U5 tri-snRNP-associated protein 1 OS=Homo sapiens OX=9606 GN=SART1 PE=1 SV=1	113491	20	7.43477	0.18199	29.87	0.836542	0.420003	0.999947	-4.69927	CA	no_hit
LIMCH1	Q9UPQ0|Q9UPQ0-10|Q9UPQ0-2|Q9UPQ0-3|Q9UPQ0-4	LIM and calponin homology domains-containing protein 1 OS=Homo sapiens OX=9606 GN=LIMCH1 PE=1 SV=4|Isoform 10 of LIM and calponin homology domains-containing protein 1 OS=Homo sapiens OX=9606 GN=LIMCH1|Isoform 2 of LIM and calponin homology domains-containing protein 1 OS=Homo sapiens OX=9606 GN=LIMCH1|Isoform 3 of LIM and calponin homology domains-containing protein 1 OS=Homo sapiens OX=9606 GN=…	149284.0|146008.0|146136.0|202326.0|147553.0	25	7.37467	0.097914	29.6124	0.83633	0.420117	0.999947	-4.69934	CA	no_hit
[truncated: 24,727 more rows]
